# Supplementary material for: Childhood-onset dystonia-causing KMT2B variants result in a distinctive genomic hypermethylation profile
Source: PubMed Central journal article supplement (PMC8359374; doi:10.1186/s13148-021-01145-y), 2021-08-11

Region 1: chr7:95025194–95027751

Fisher: 3.69232183739702e-171

Stouffer: 2.3285624328954e-160

Mean difference: 0.143821508375814

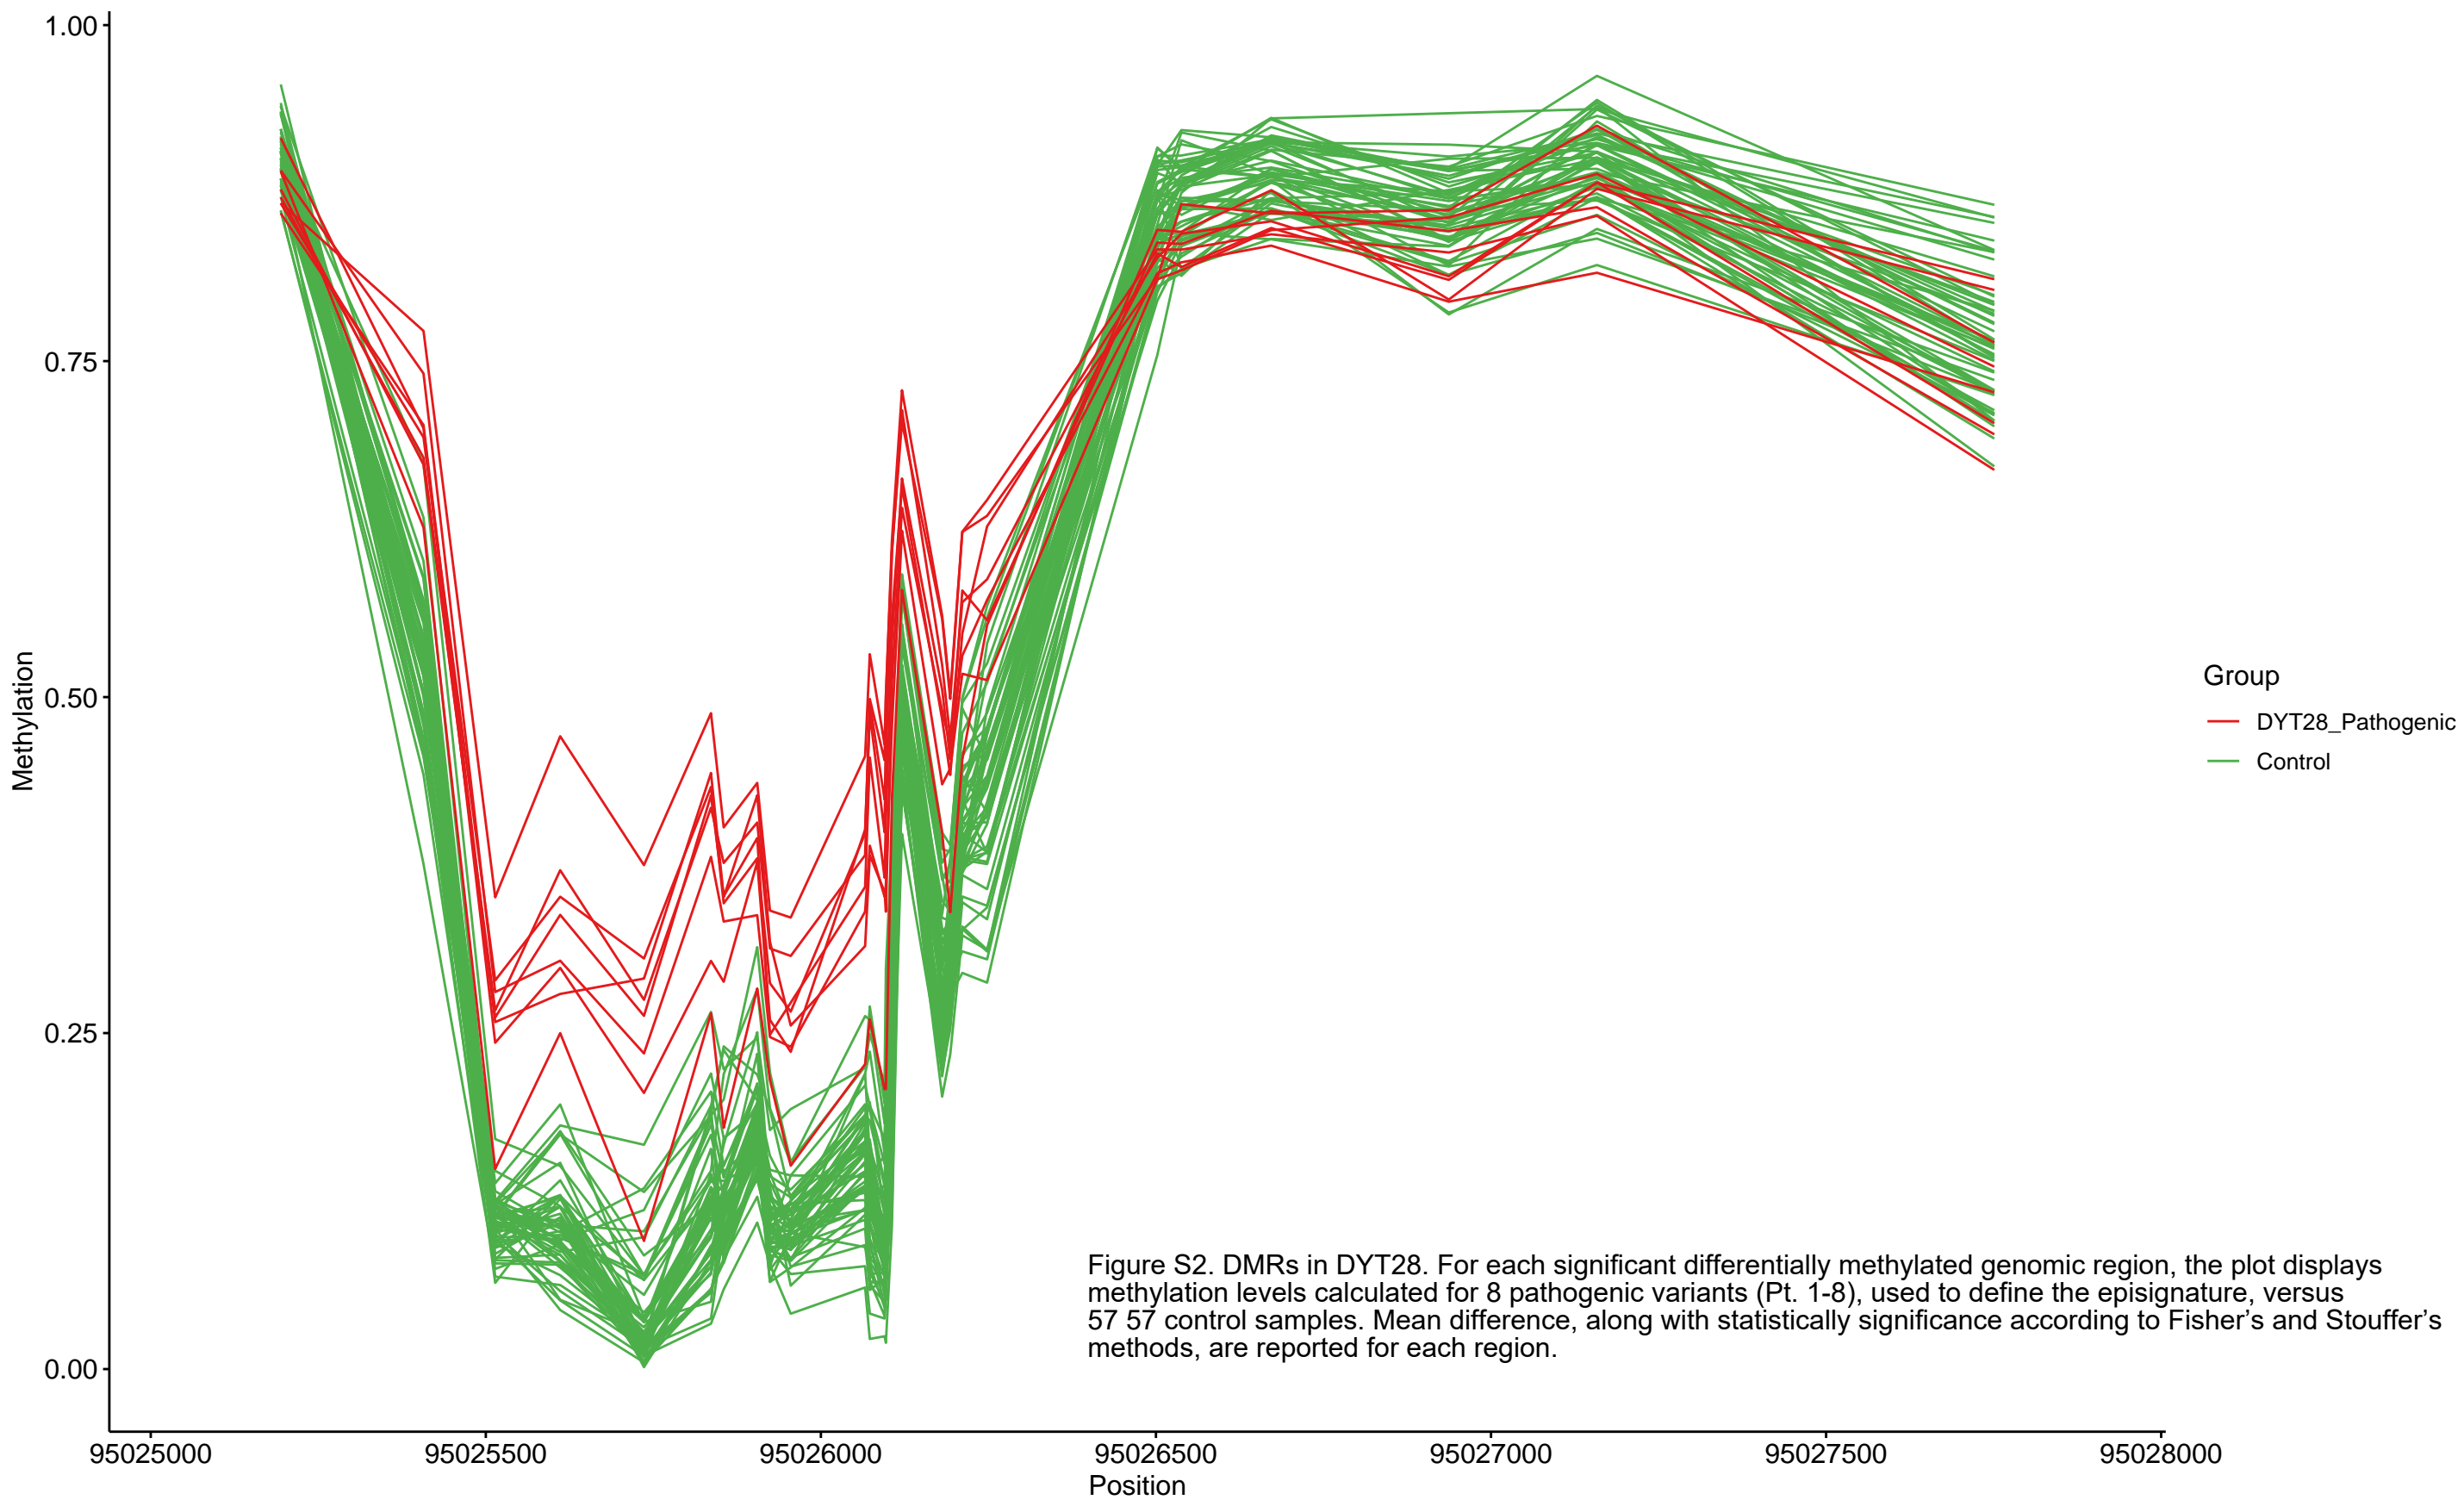

Region 2: chr6:146348158–146351044

Fisher:  $2.19334861116671e-129$

Stouffer:  $8.21124448274938e-113$

Mean difference: 0.107200717879928

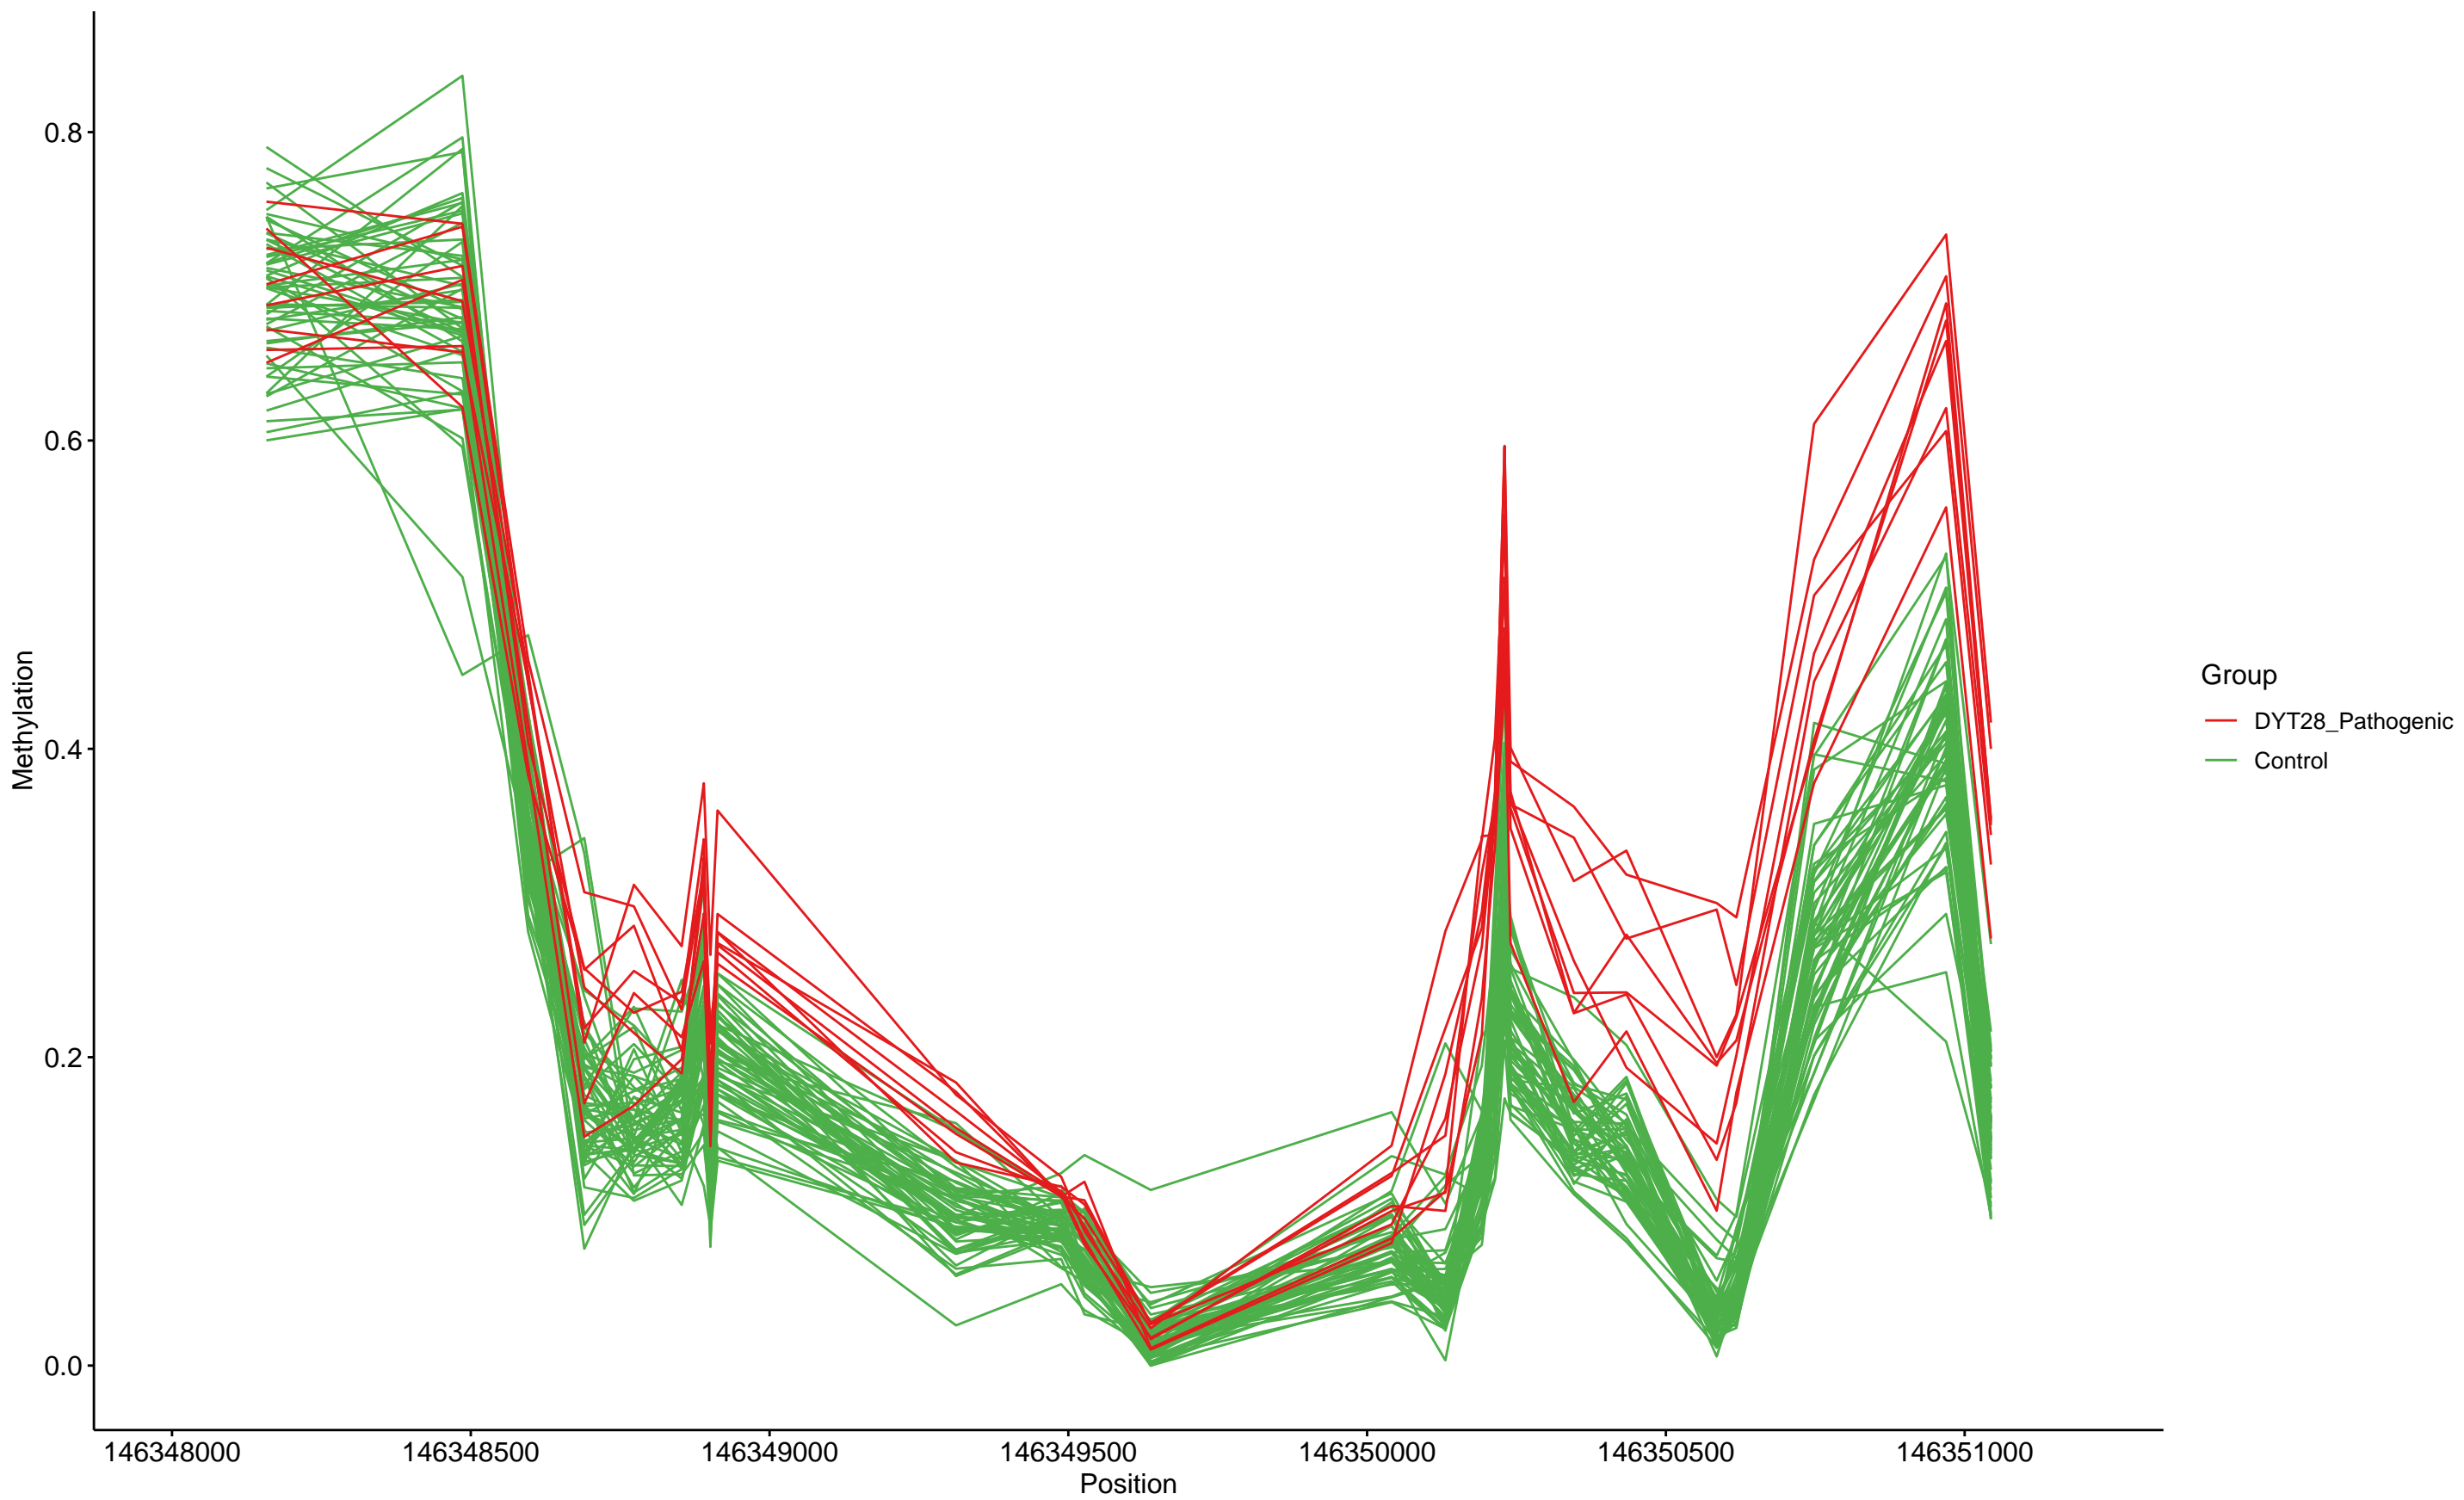

Region 3: chr6:142409046–142410760

Fisher: 3.18039375540878e-113

Stouffer: 9.24846365179647e-111

Mean difference: 0.145396417483785

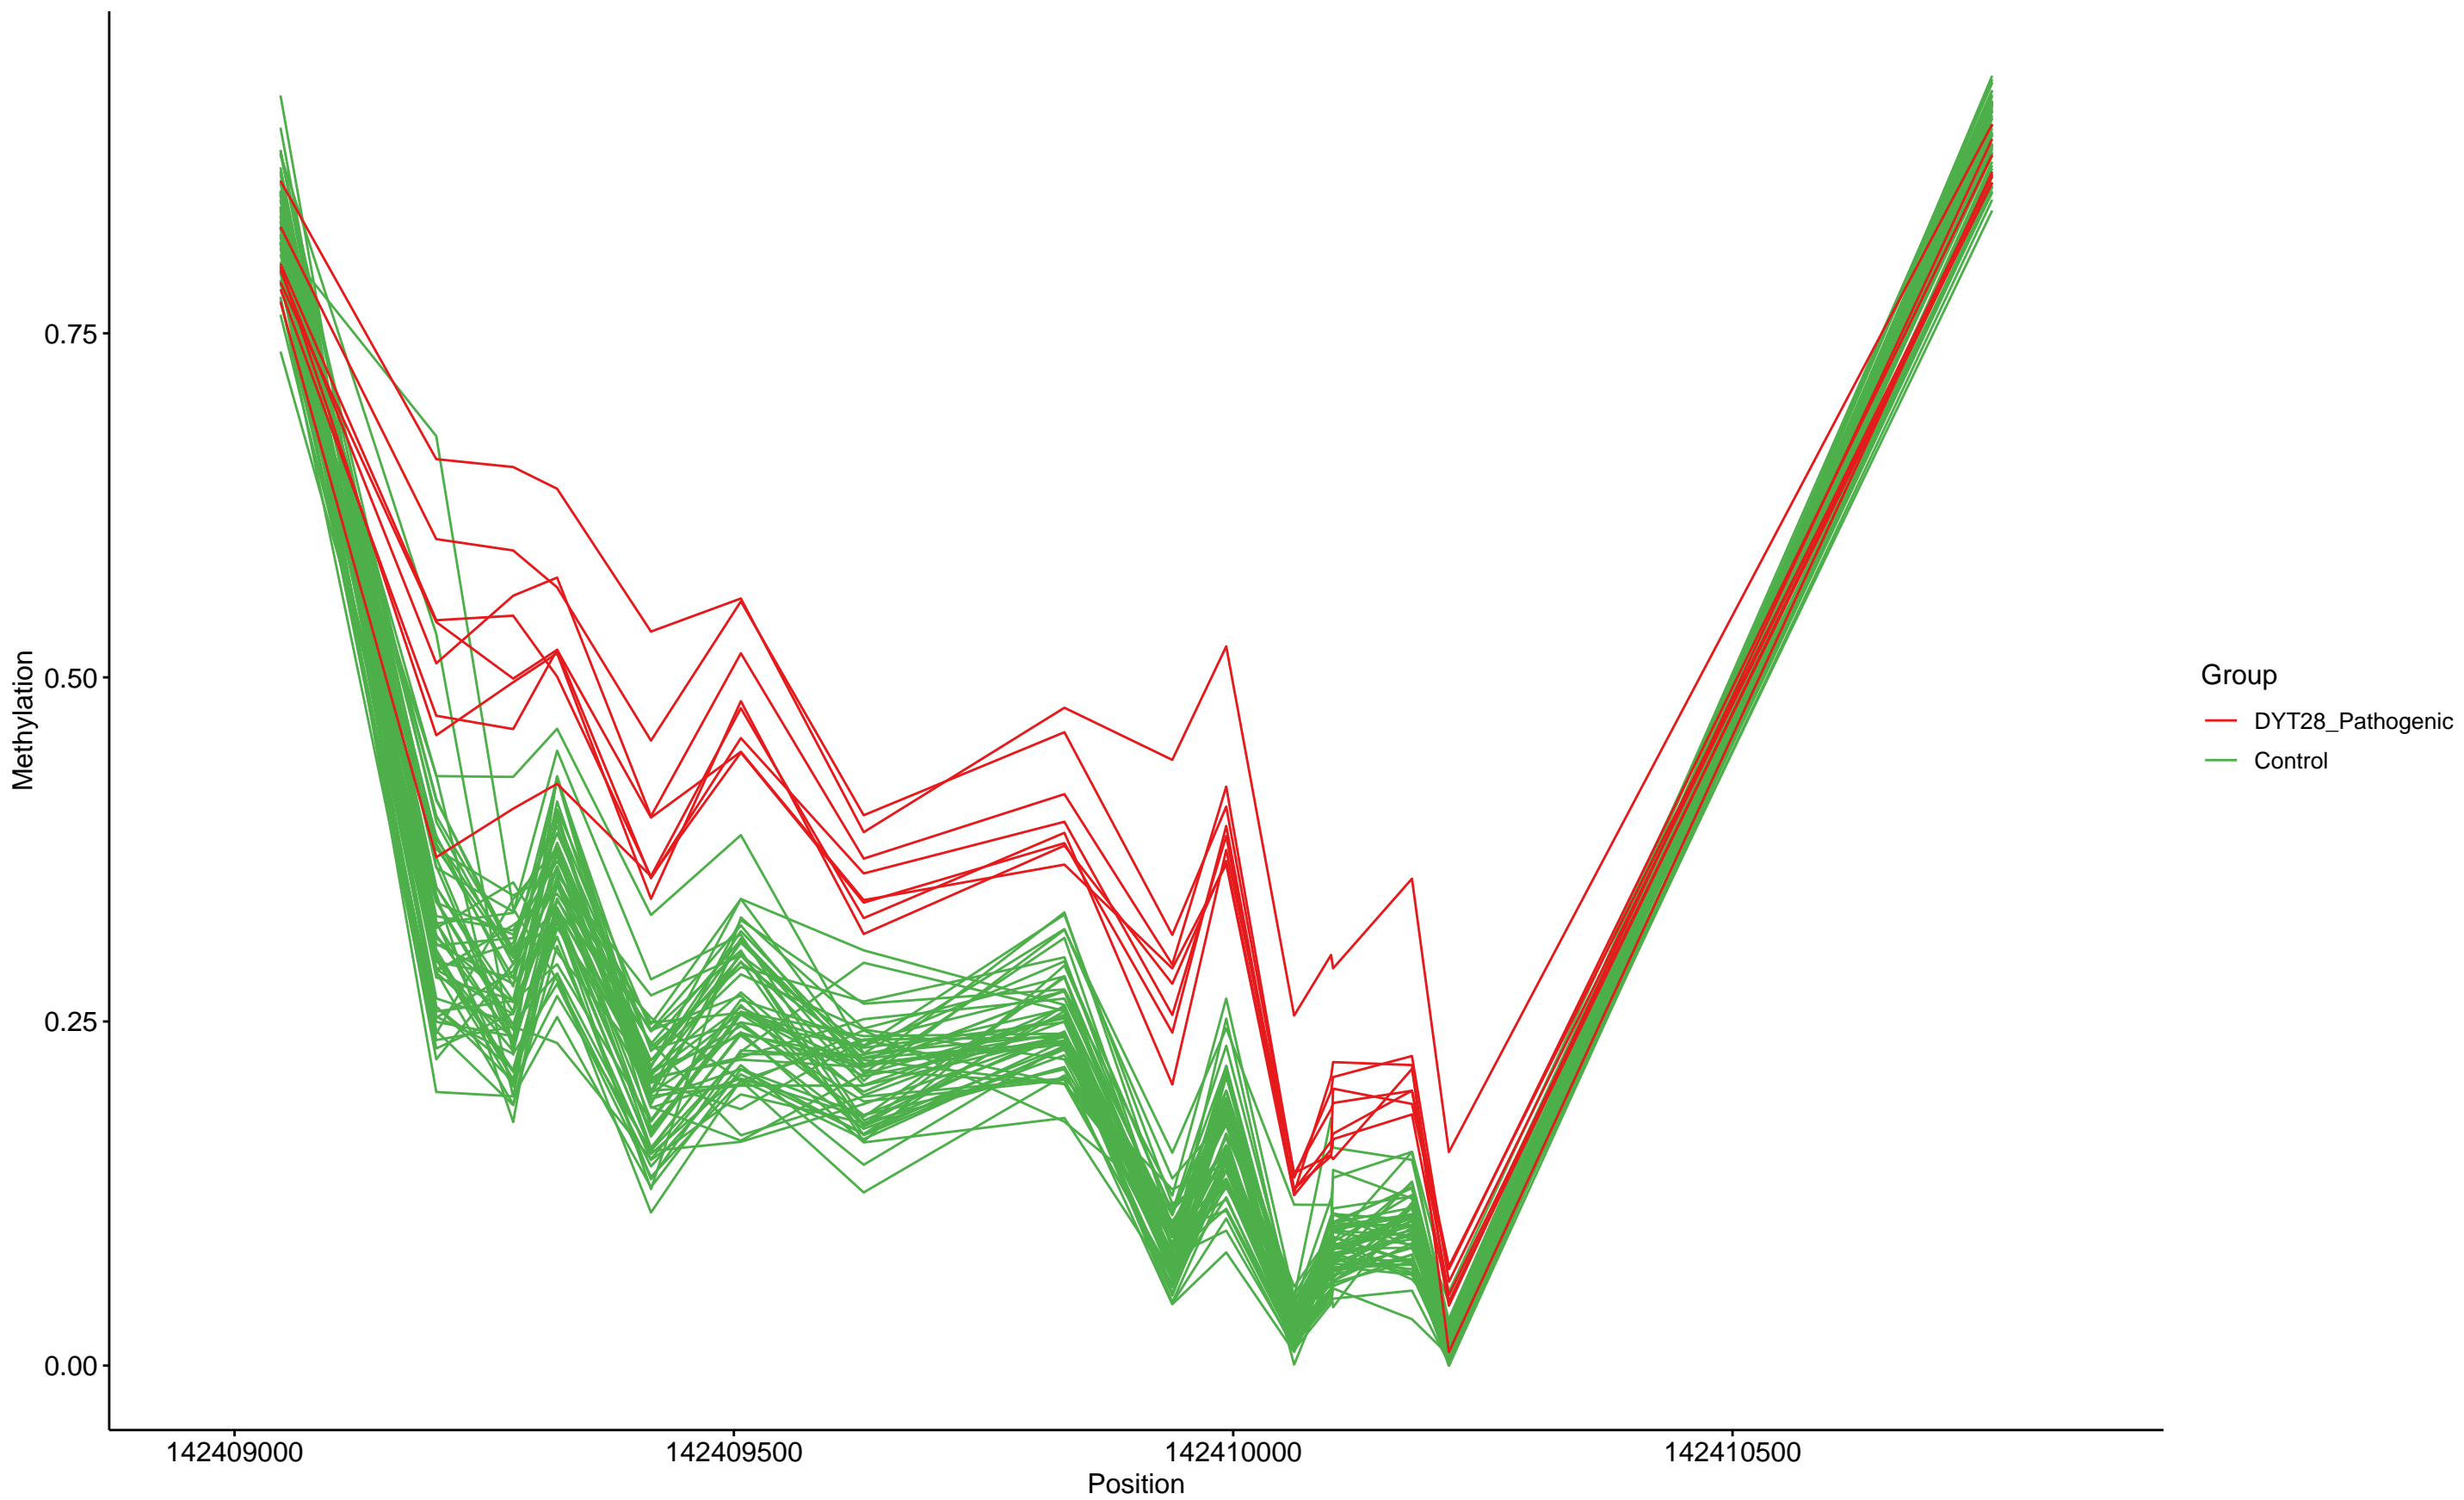

Region 4: chr6:10881086–10884891

Fisher:  $2.9660427255257e-102$

Stouffer:  $6.99764354935009e-94$

Mean difference: 0.115489823033493

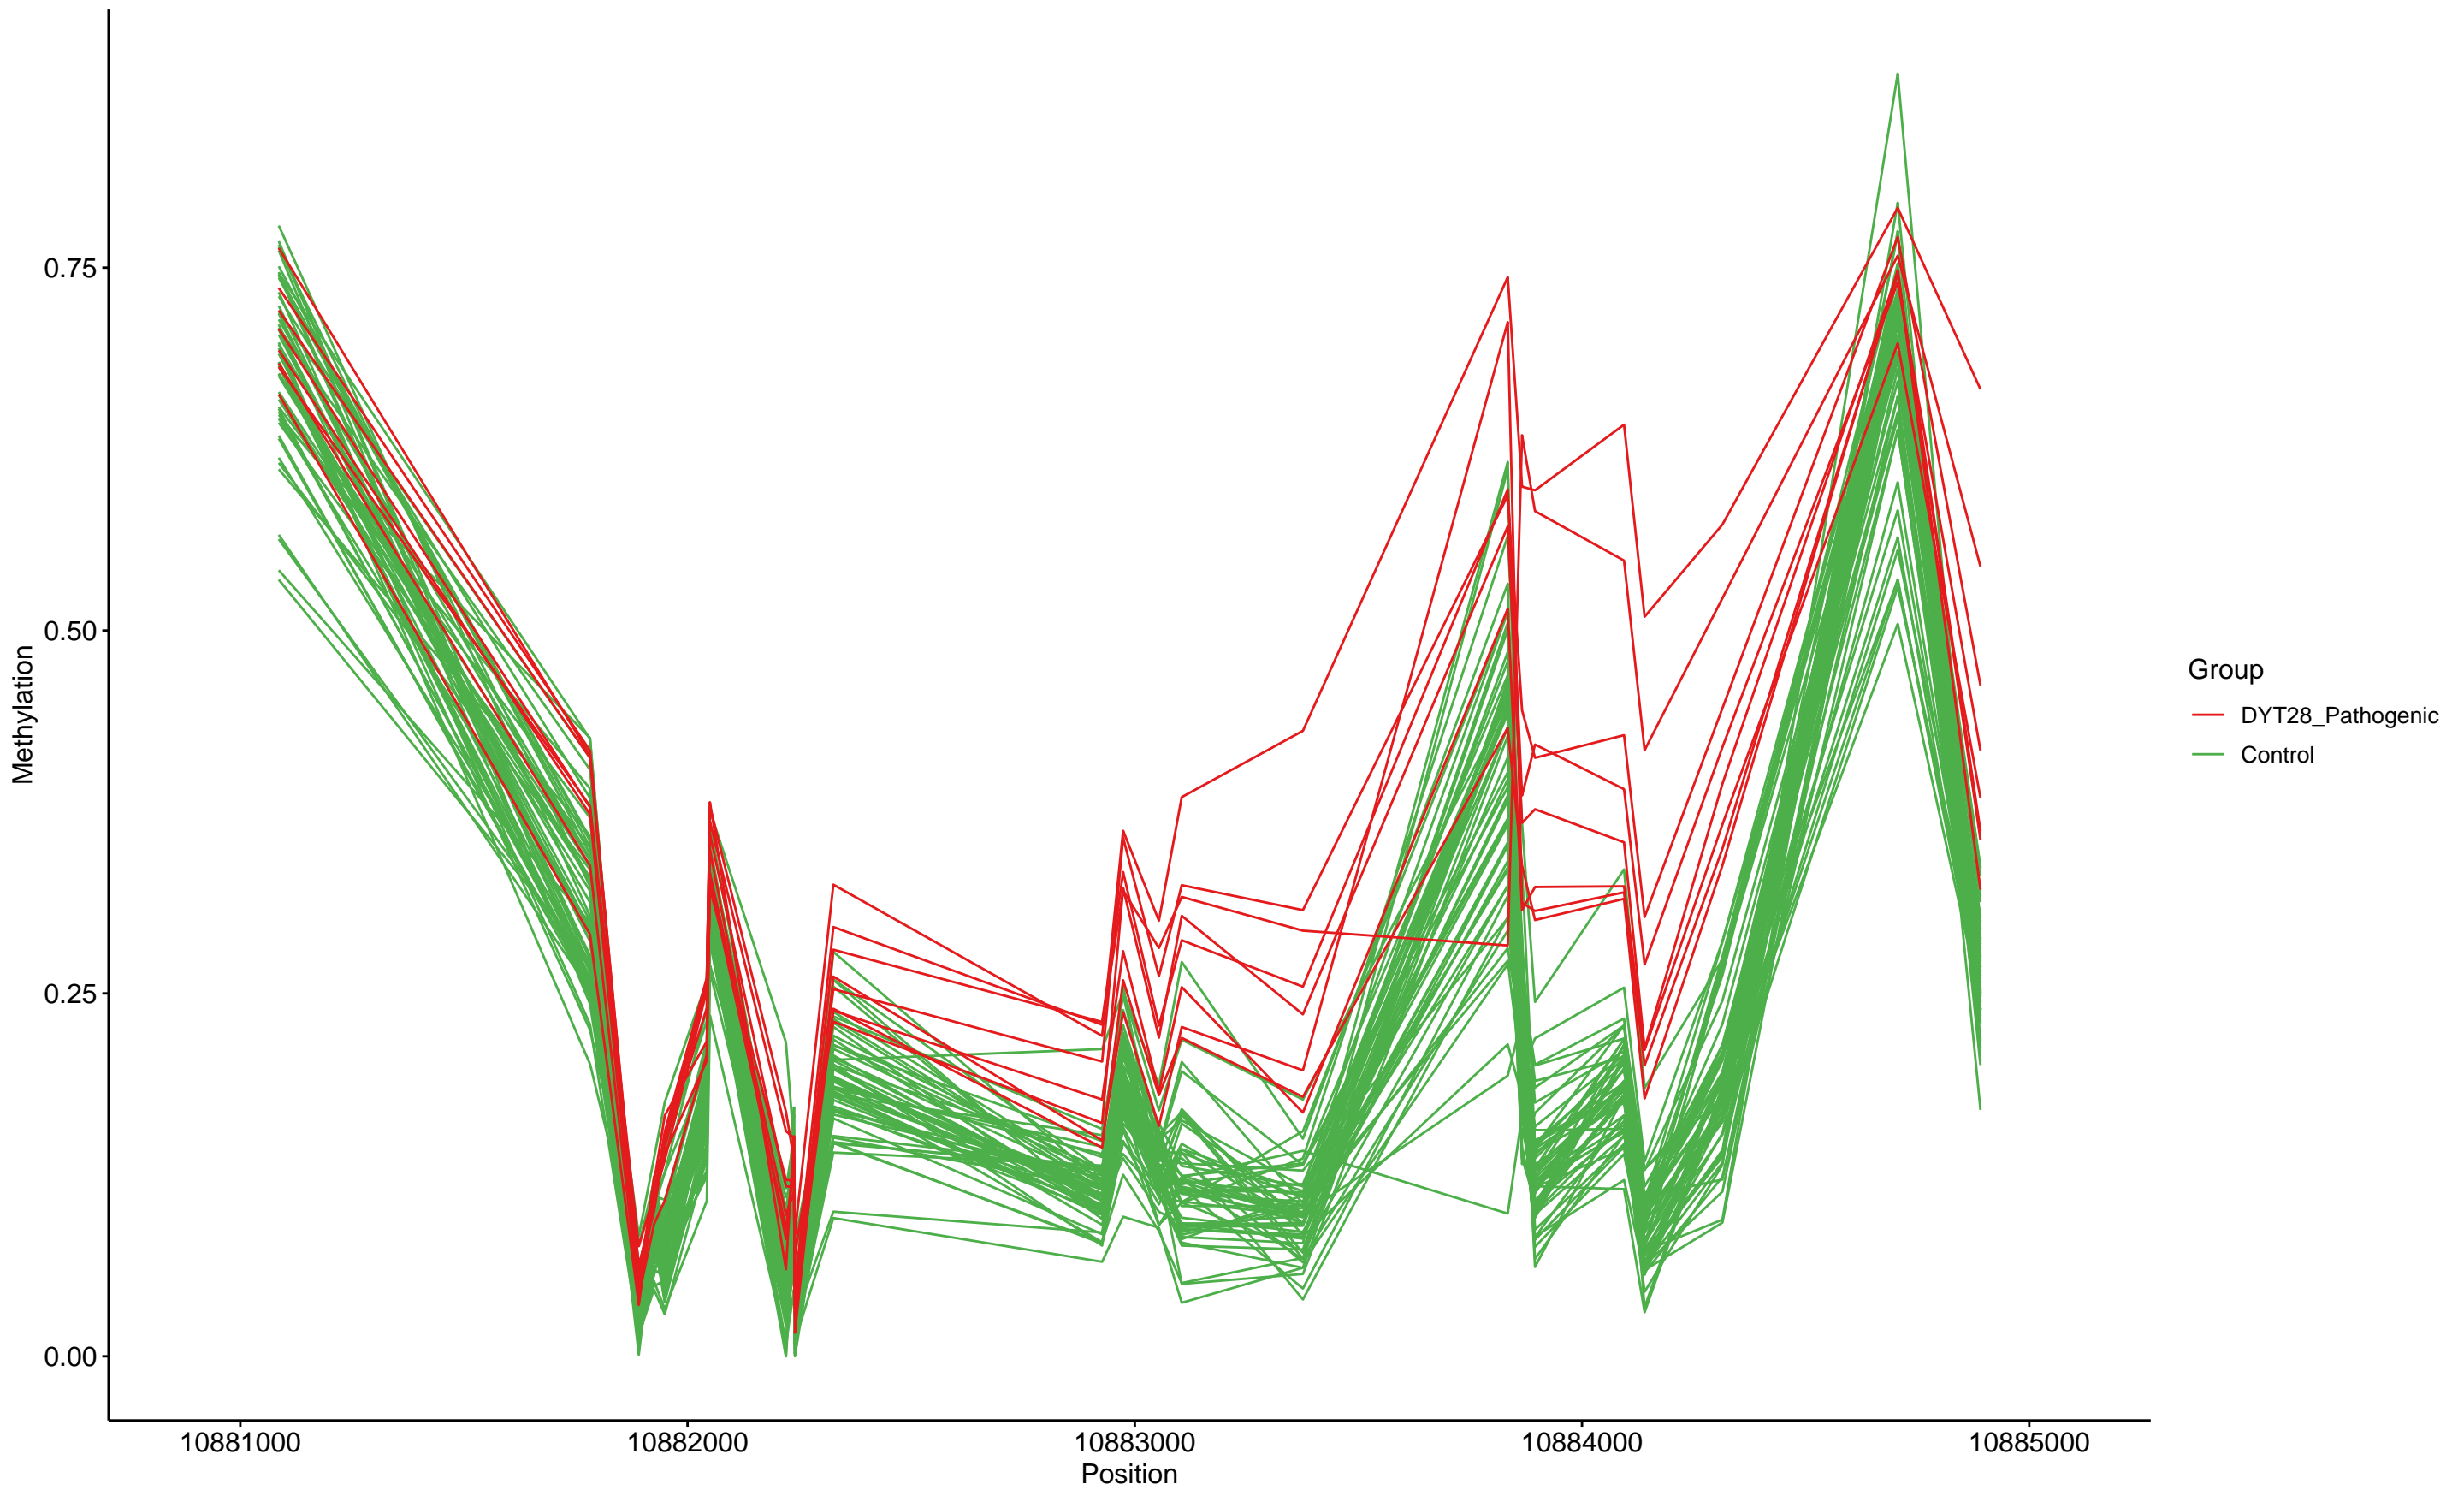



Region 5: chr15:101389568–101390350

Fisher: 4.528509977643e-94

Stouffer: 3.05097752626472e-99

Mean difference: 0.284183529441433

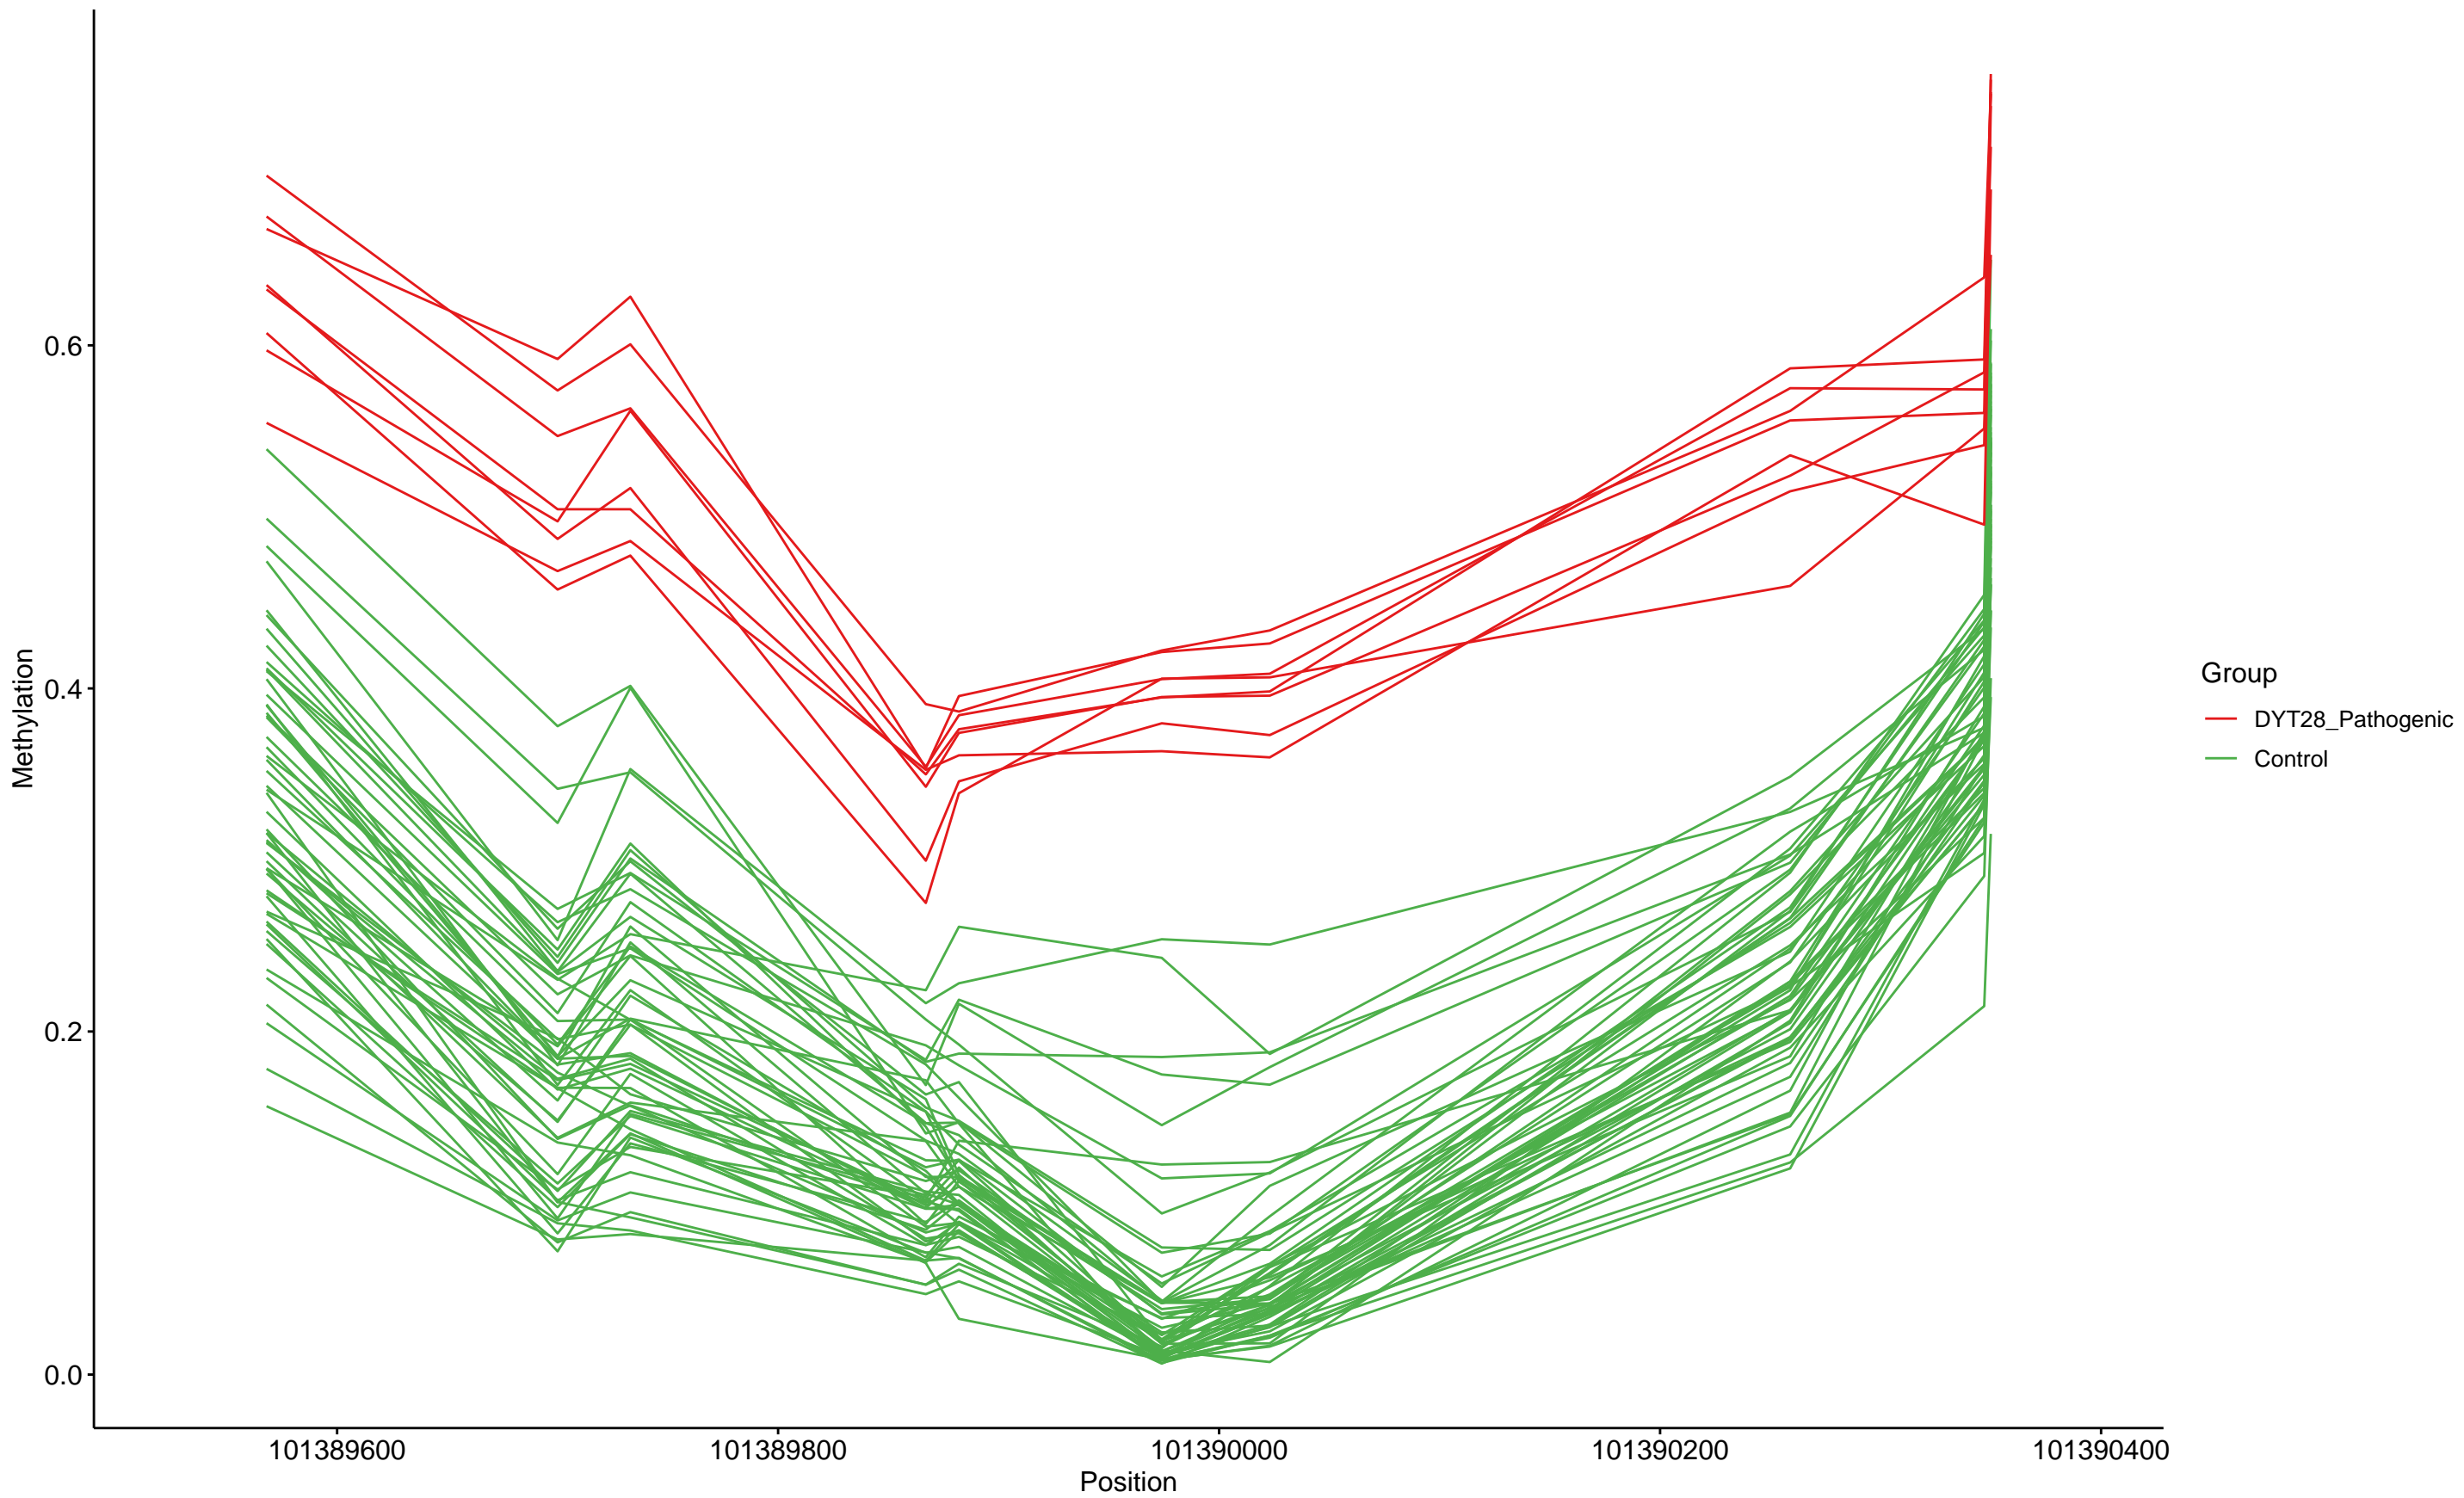

Region 6: chr7:91808223–91809117

Fisher: 2.56604838794835e-90

Stouffer: 5.00550710166191e-90

Mean difference: 0.155435004834236

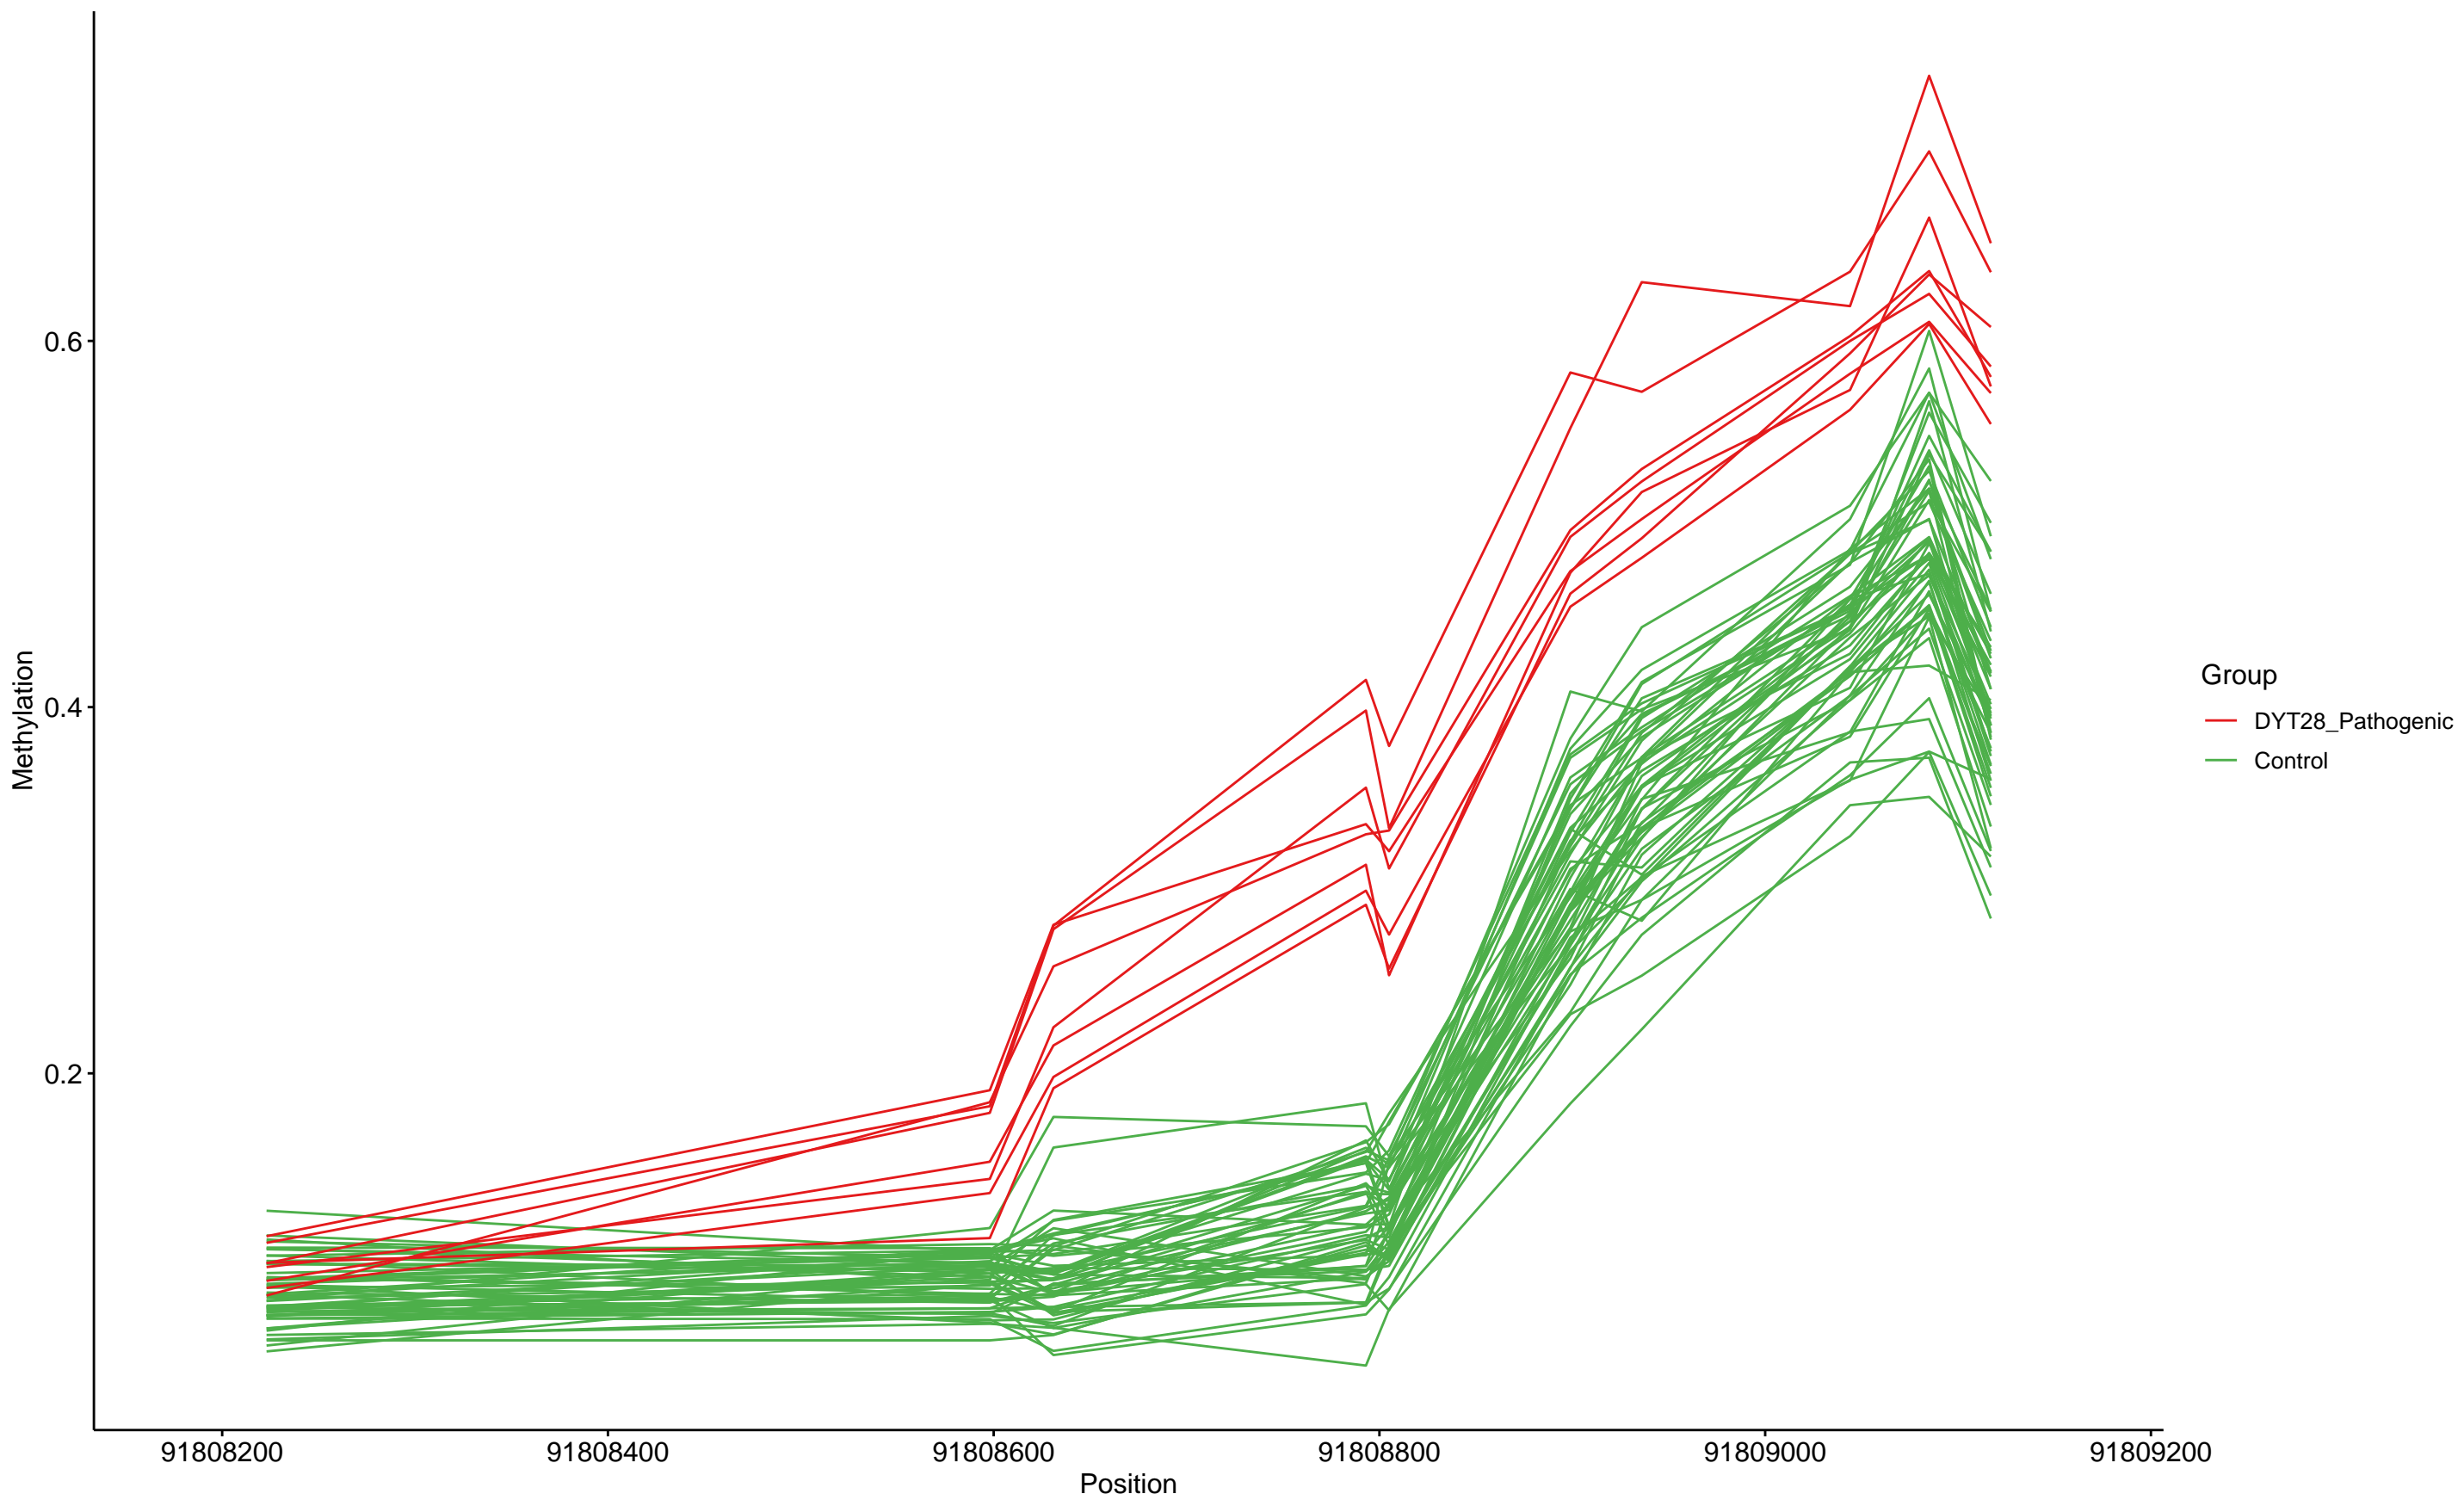

Region 7: chr12:75783428-75785295

Fisher: 1.10783830996529e-86

Stouffer: 9.03013738438034e-87

Mean difference: 0.245570650356238

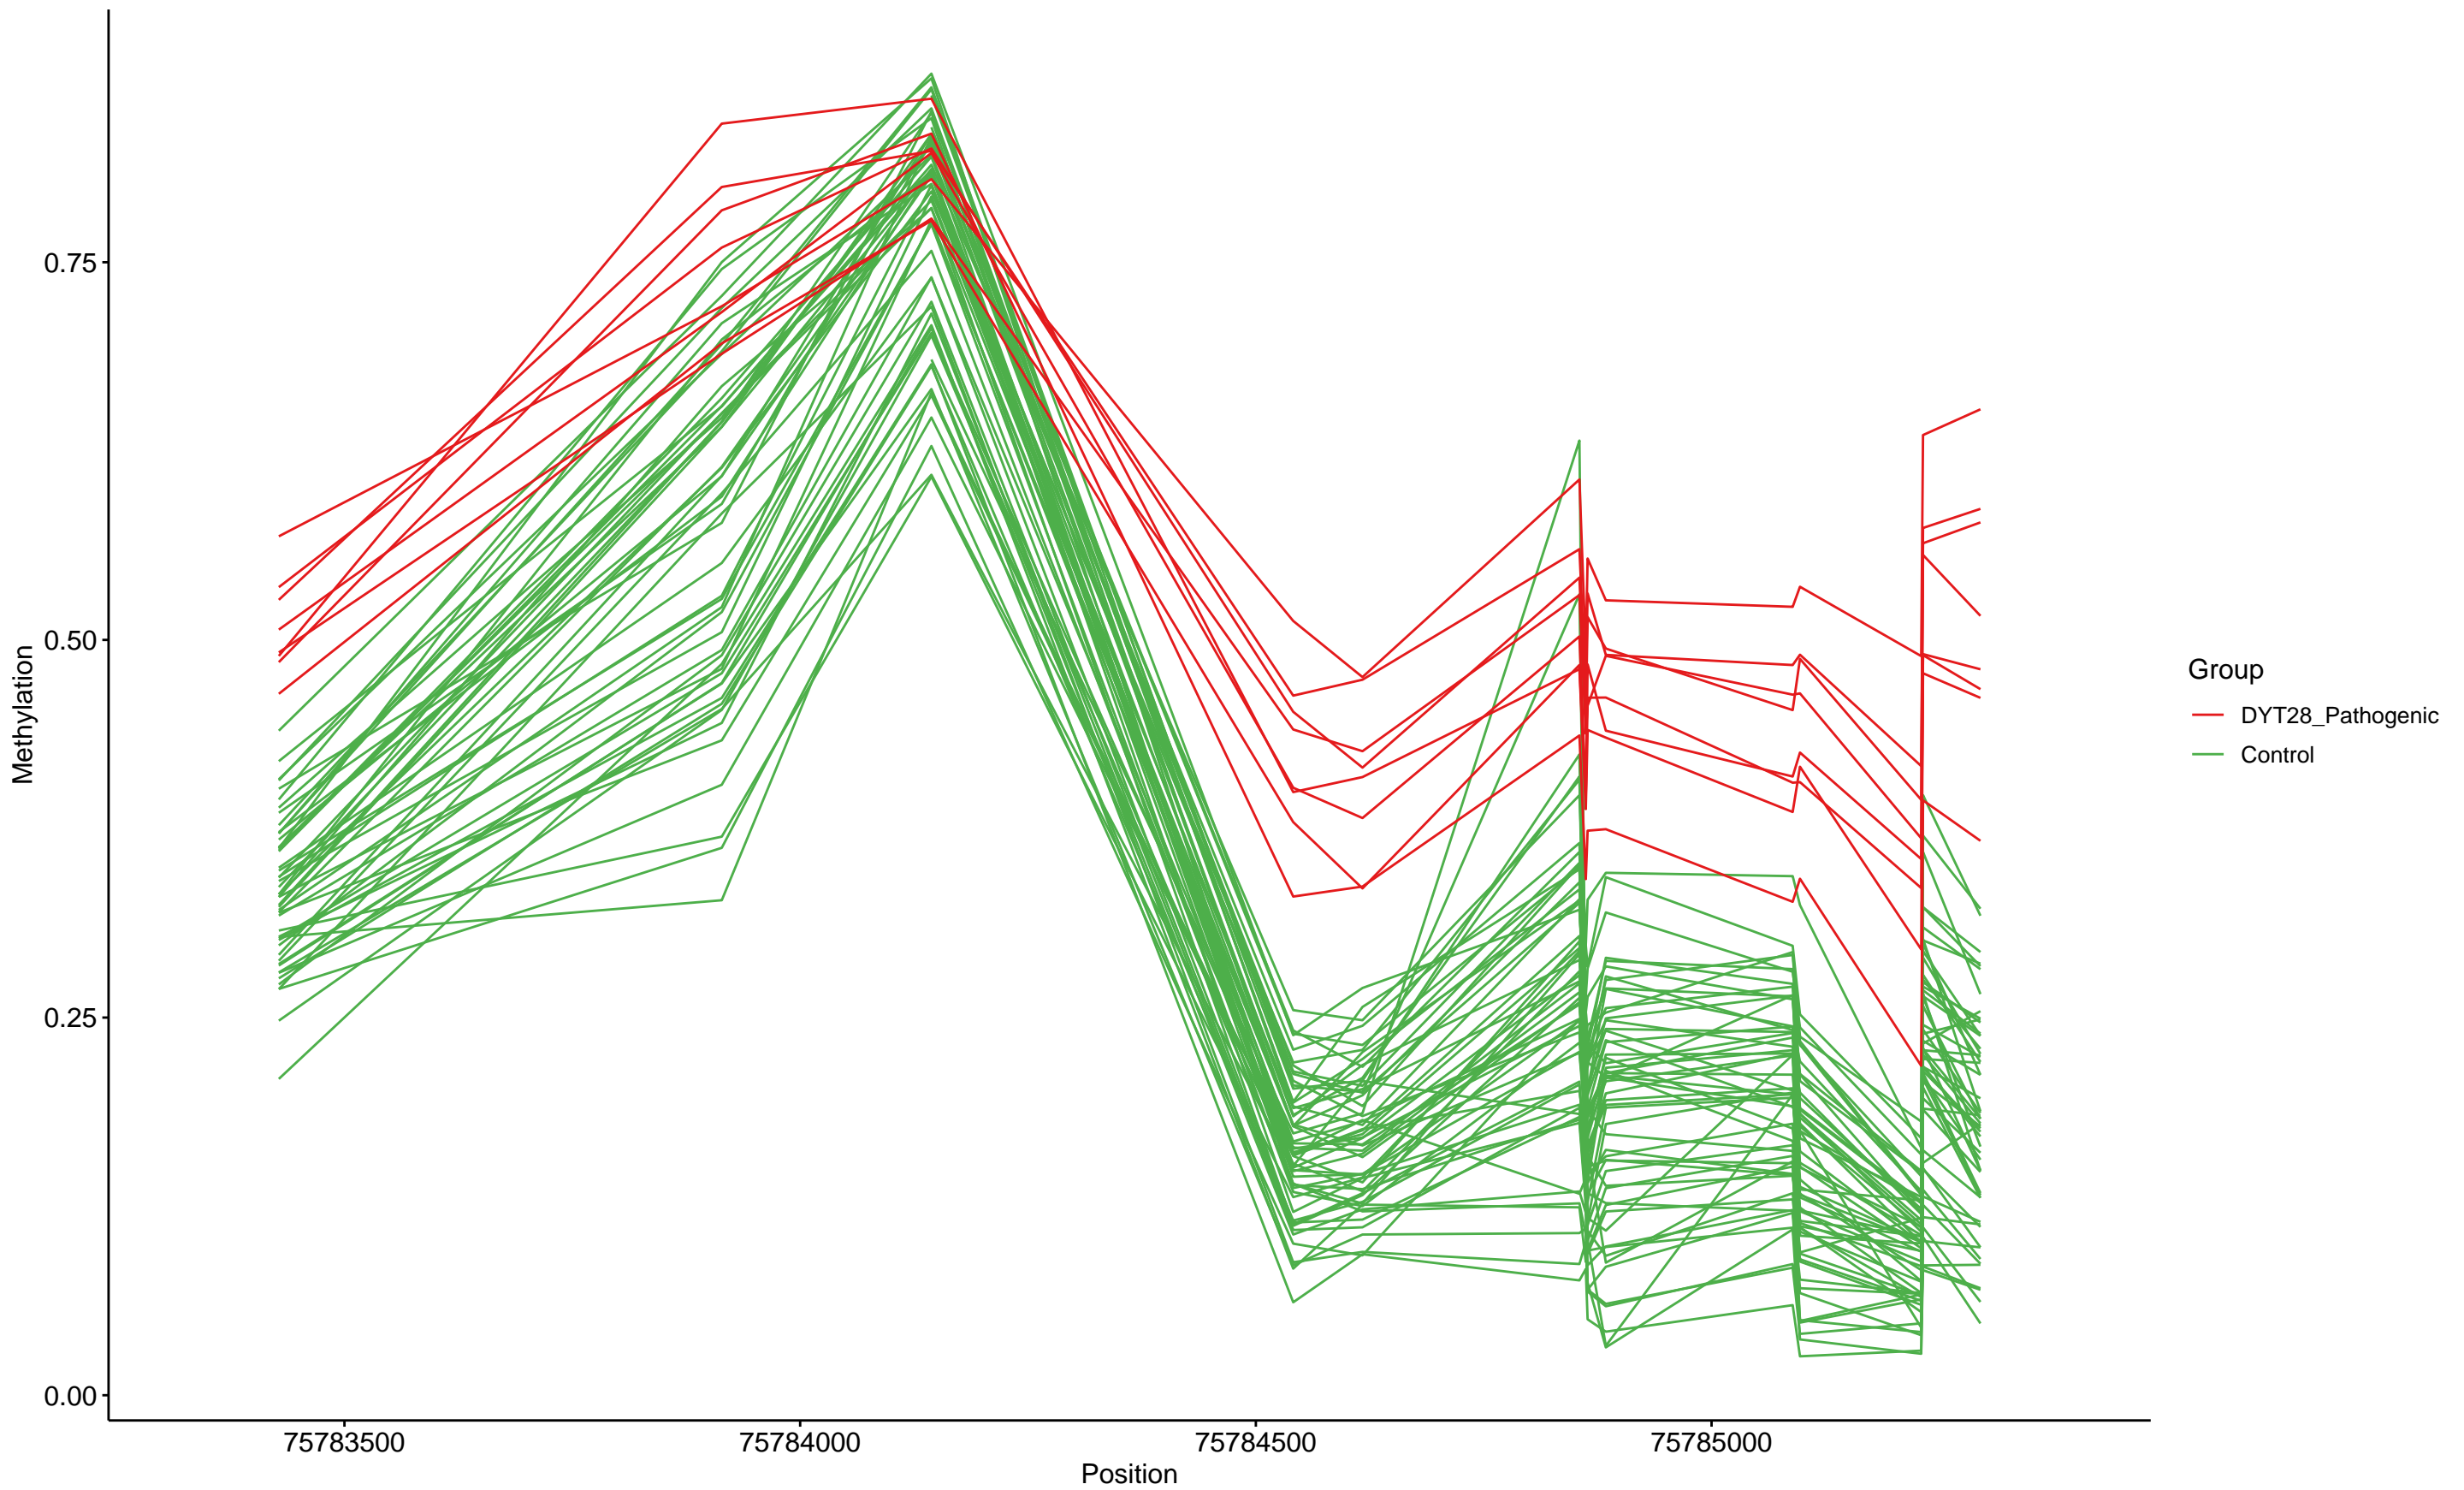



Region 8: chr2:183942179–183943938

Fisher: 1.73036834550569e-86

Stouffer: 3.16938905886449e-89

Mean difference: 0.10279889785758

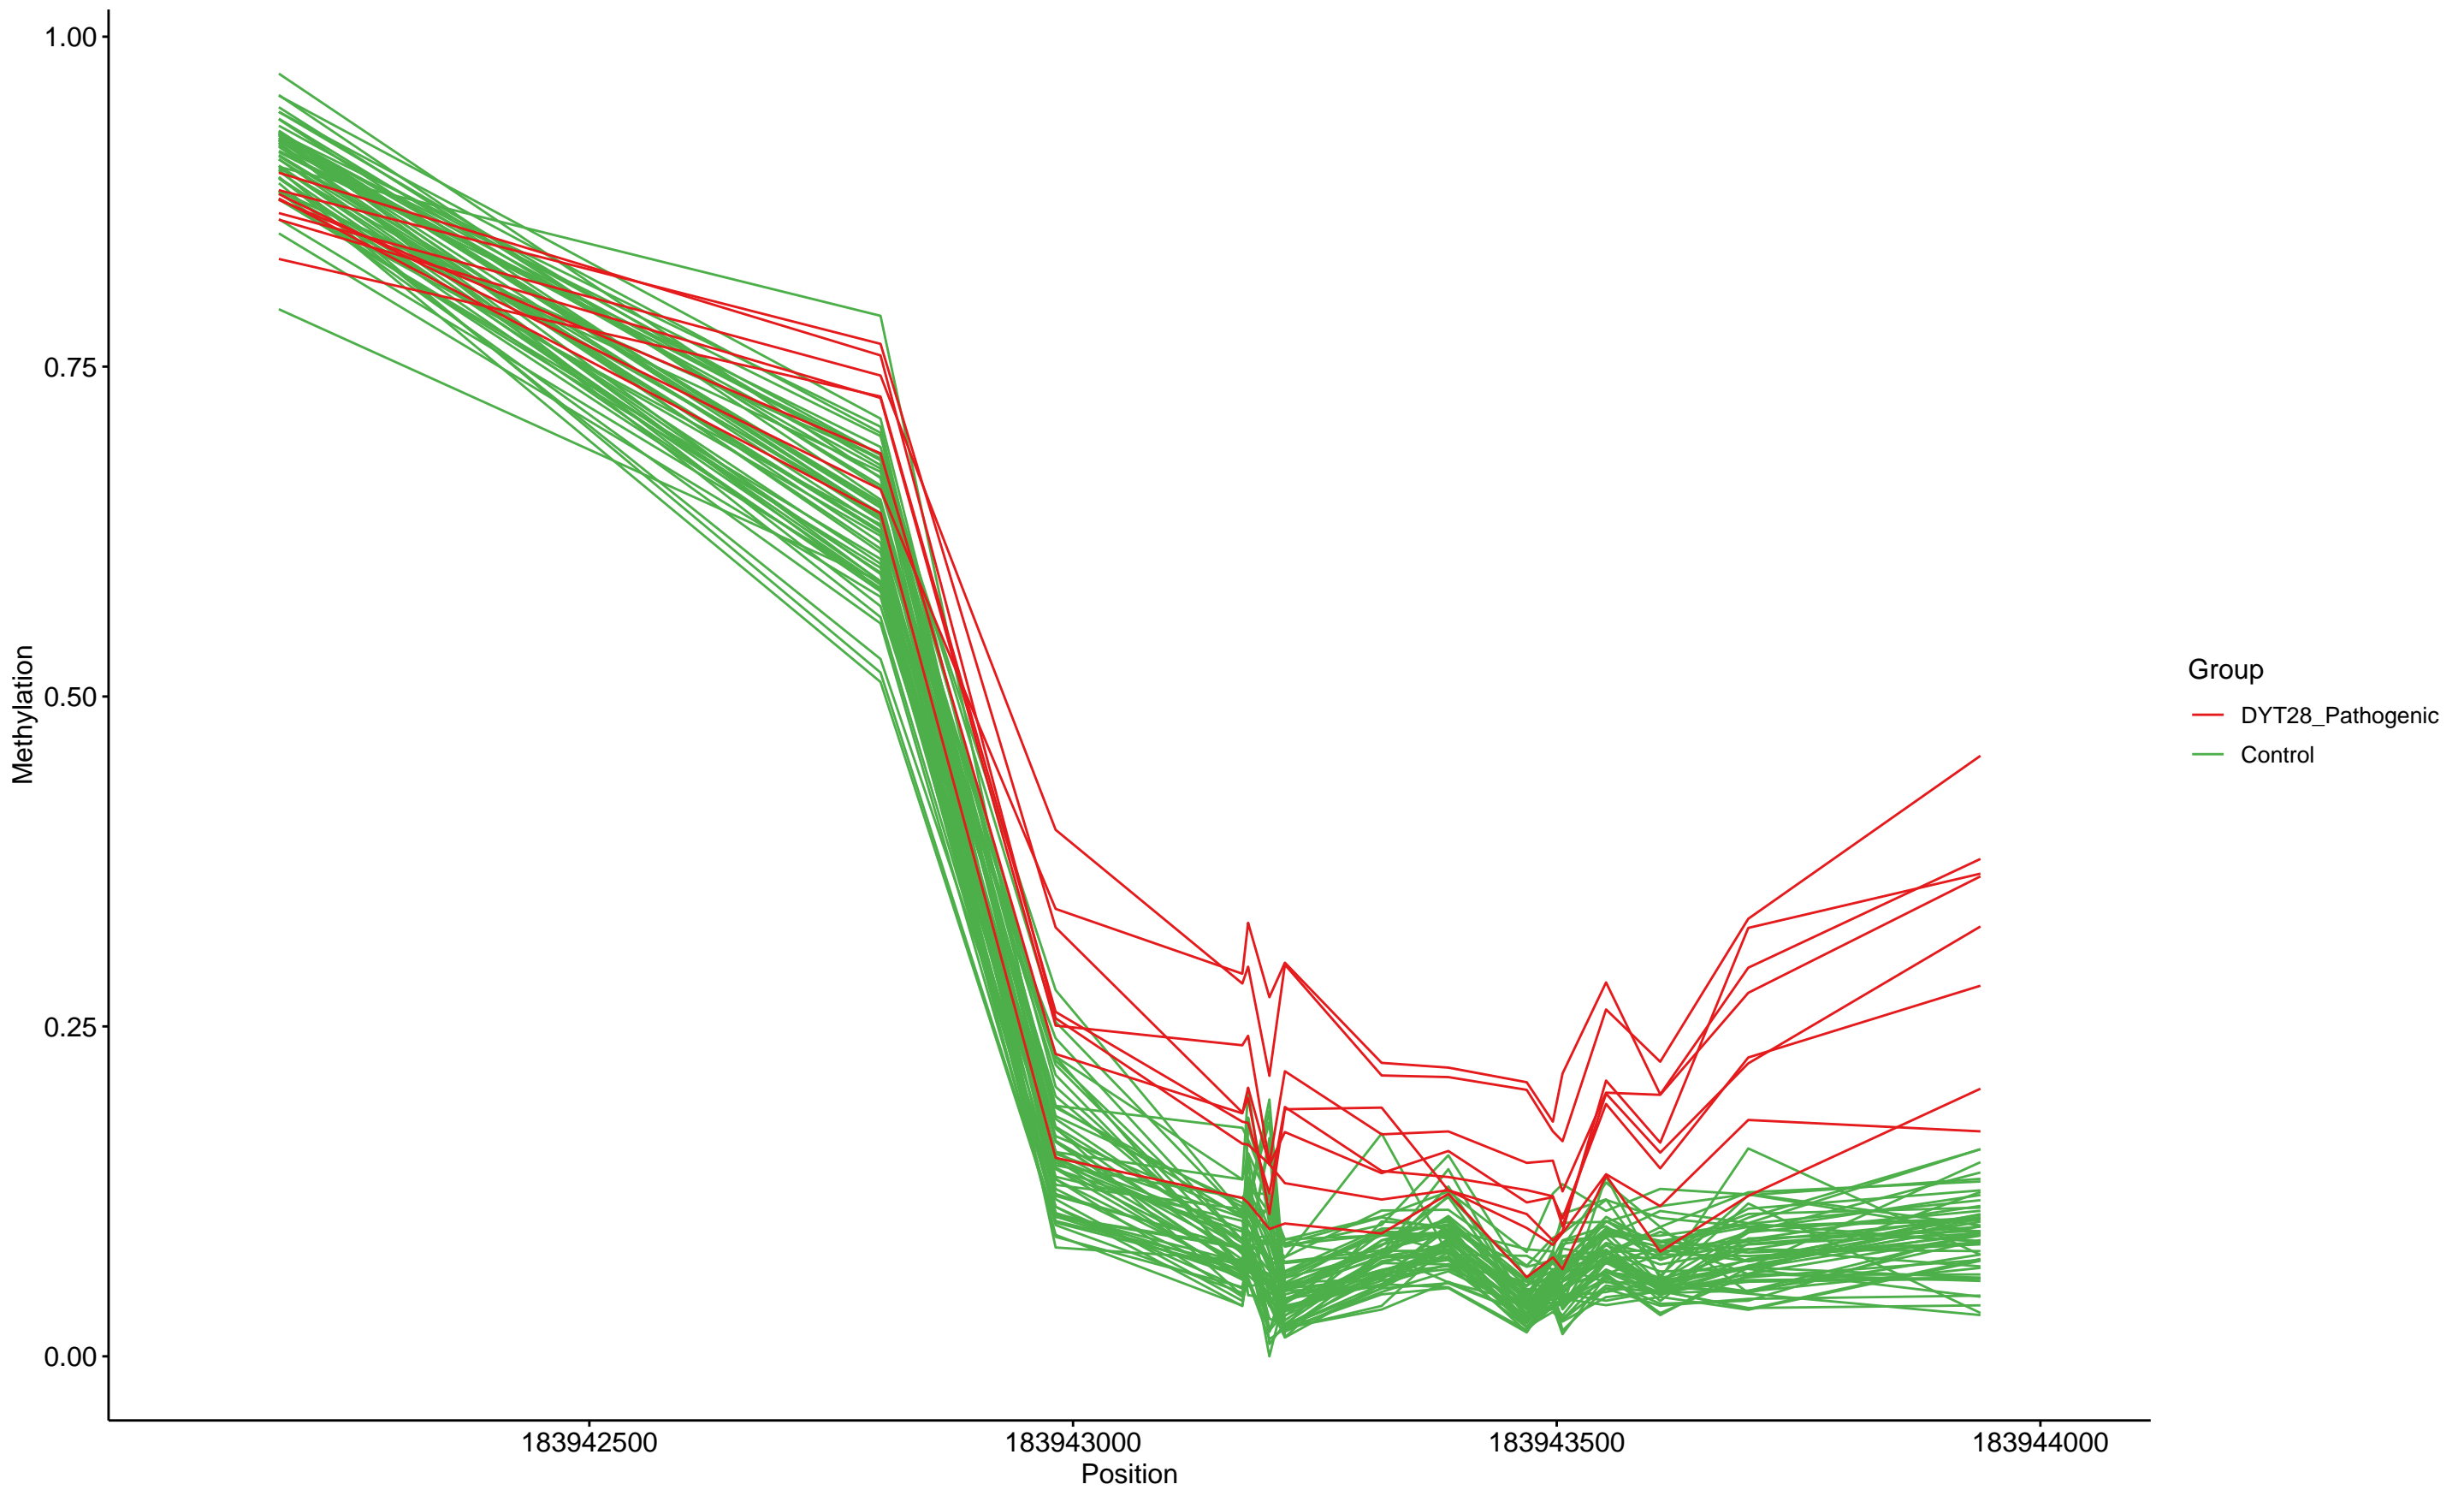



Region 9: chr4:99849709–99851281

Fisher: 1.39264169356209e-81

Stouffer: 1.44333888744599e-66

Mean difference: 0.118472273310921

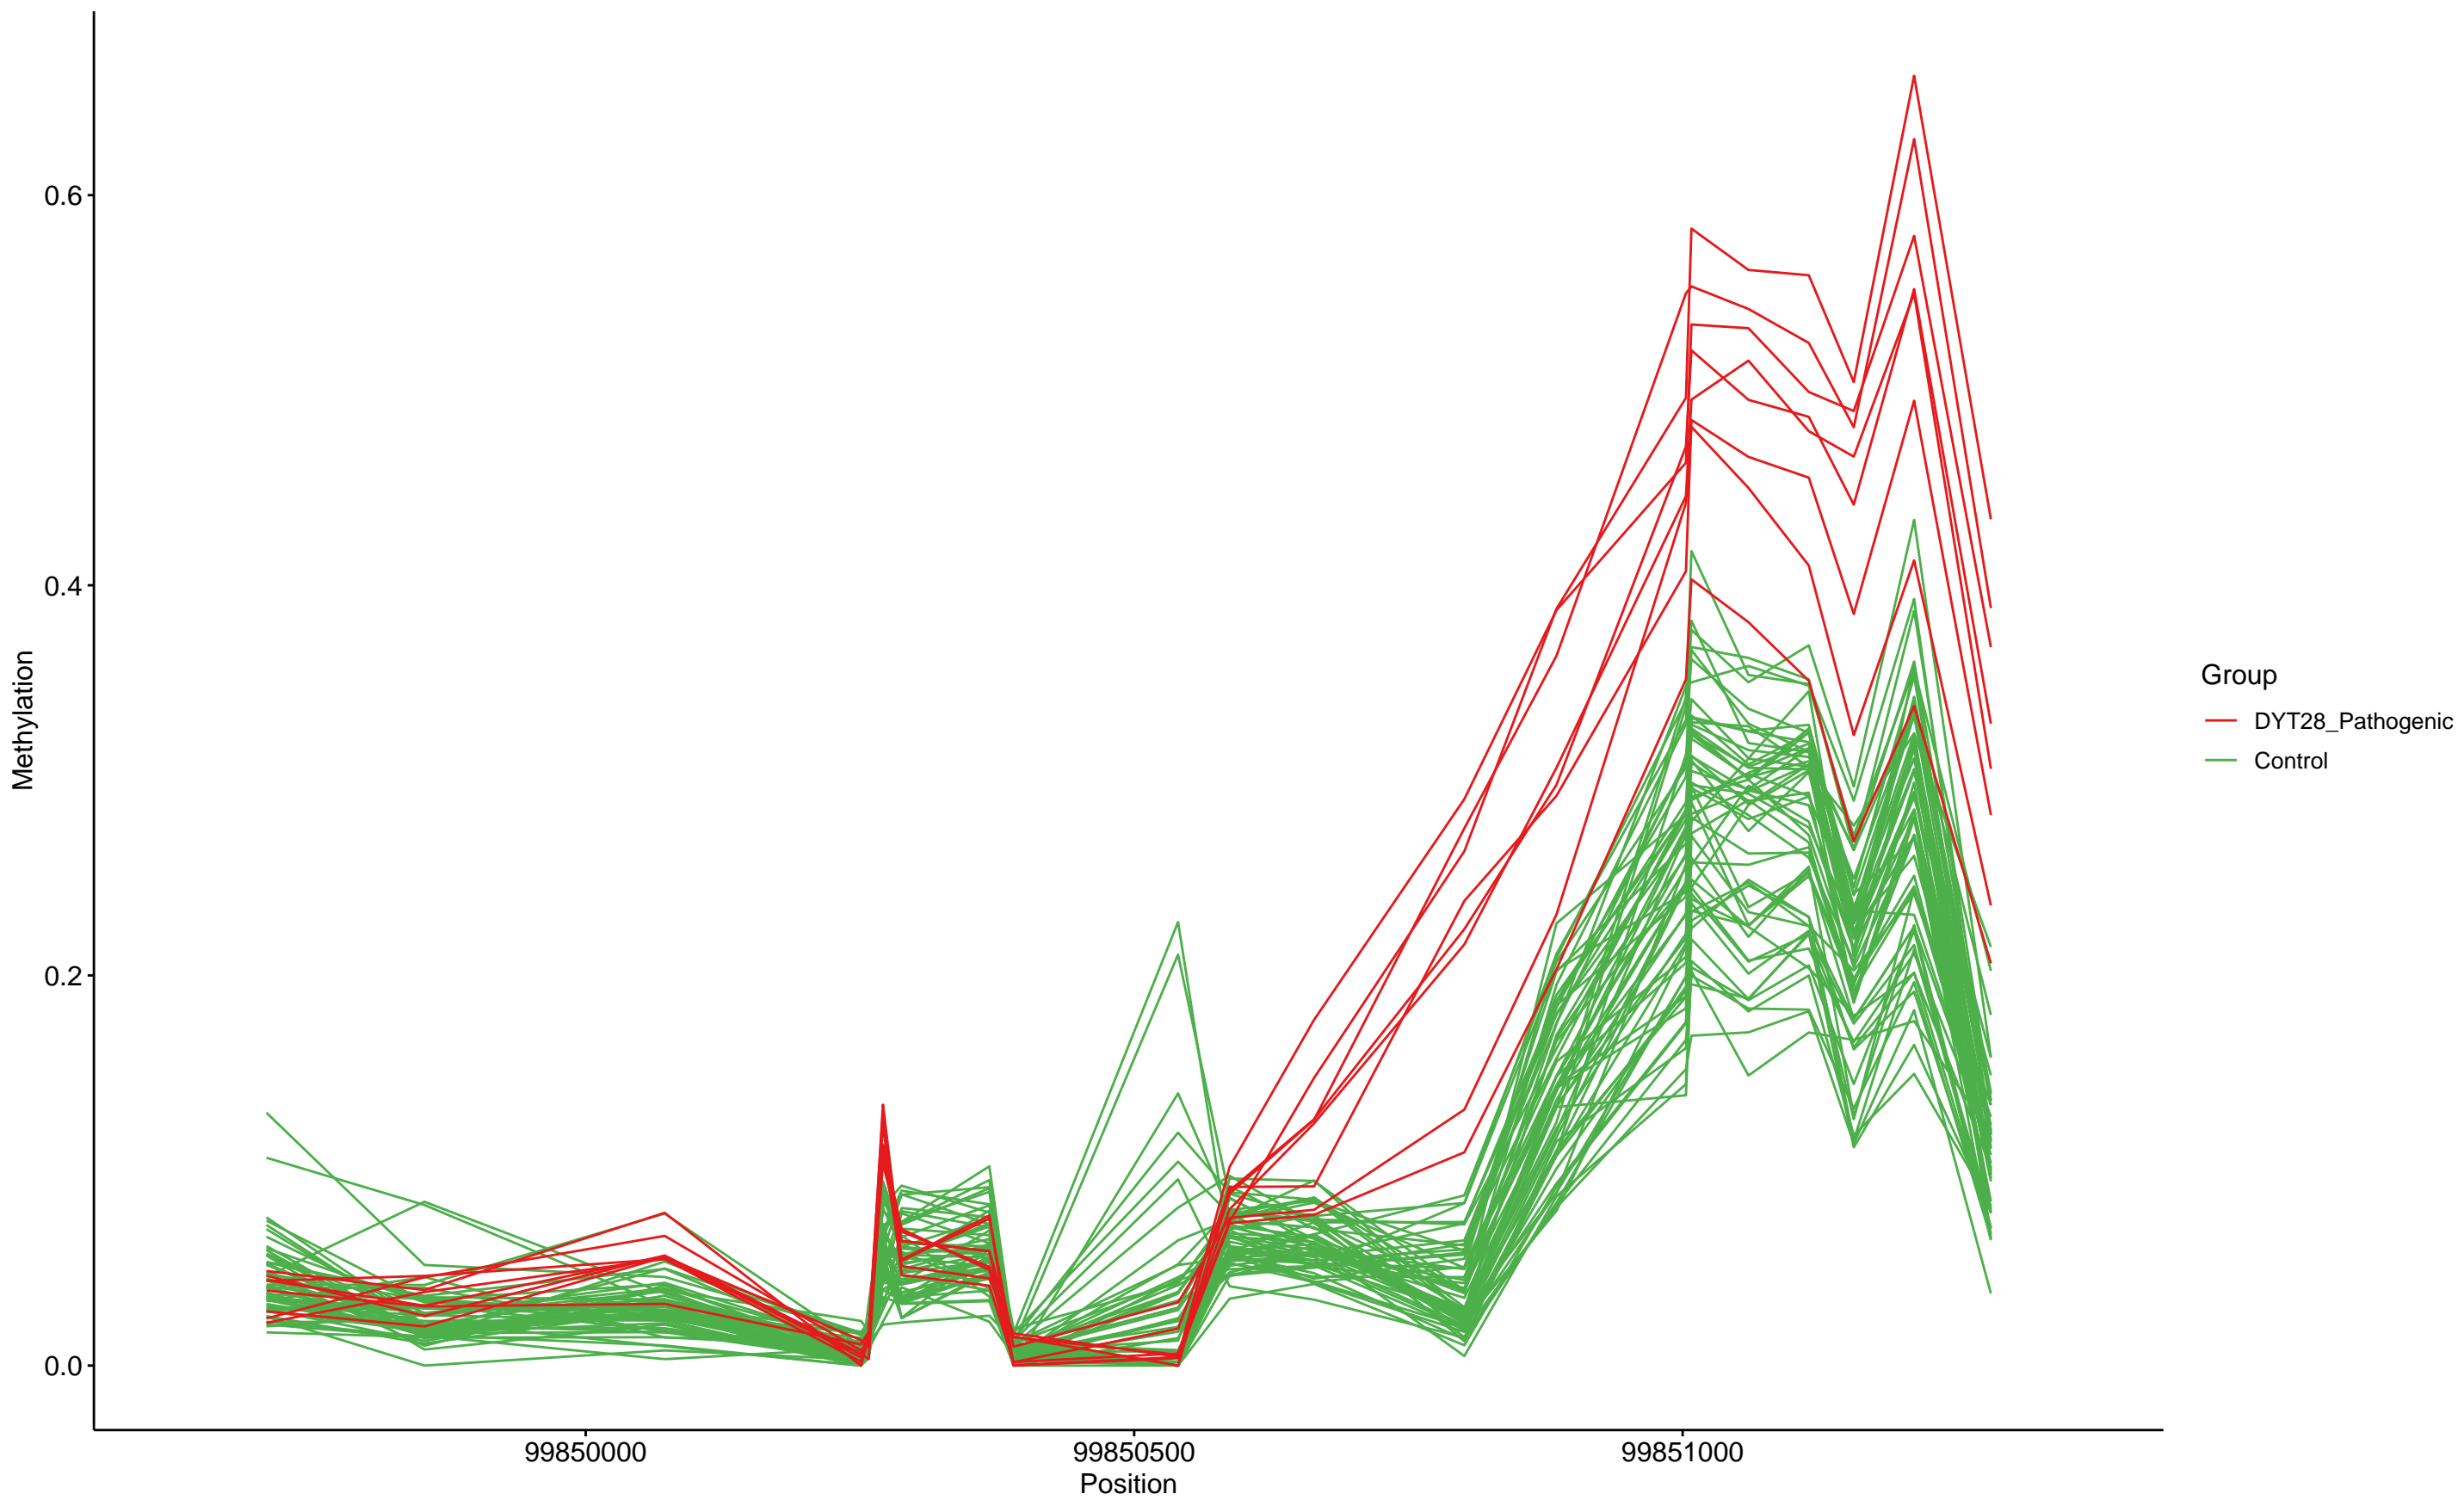

Region 10: chr1:84326185-84327482

Fisher: 1.30408365760725e-77

Stouffer: 9.07040775941965e-77

Mean difference: 0.119042091444689

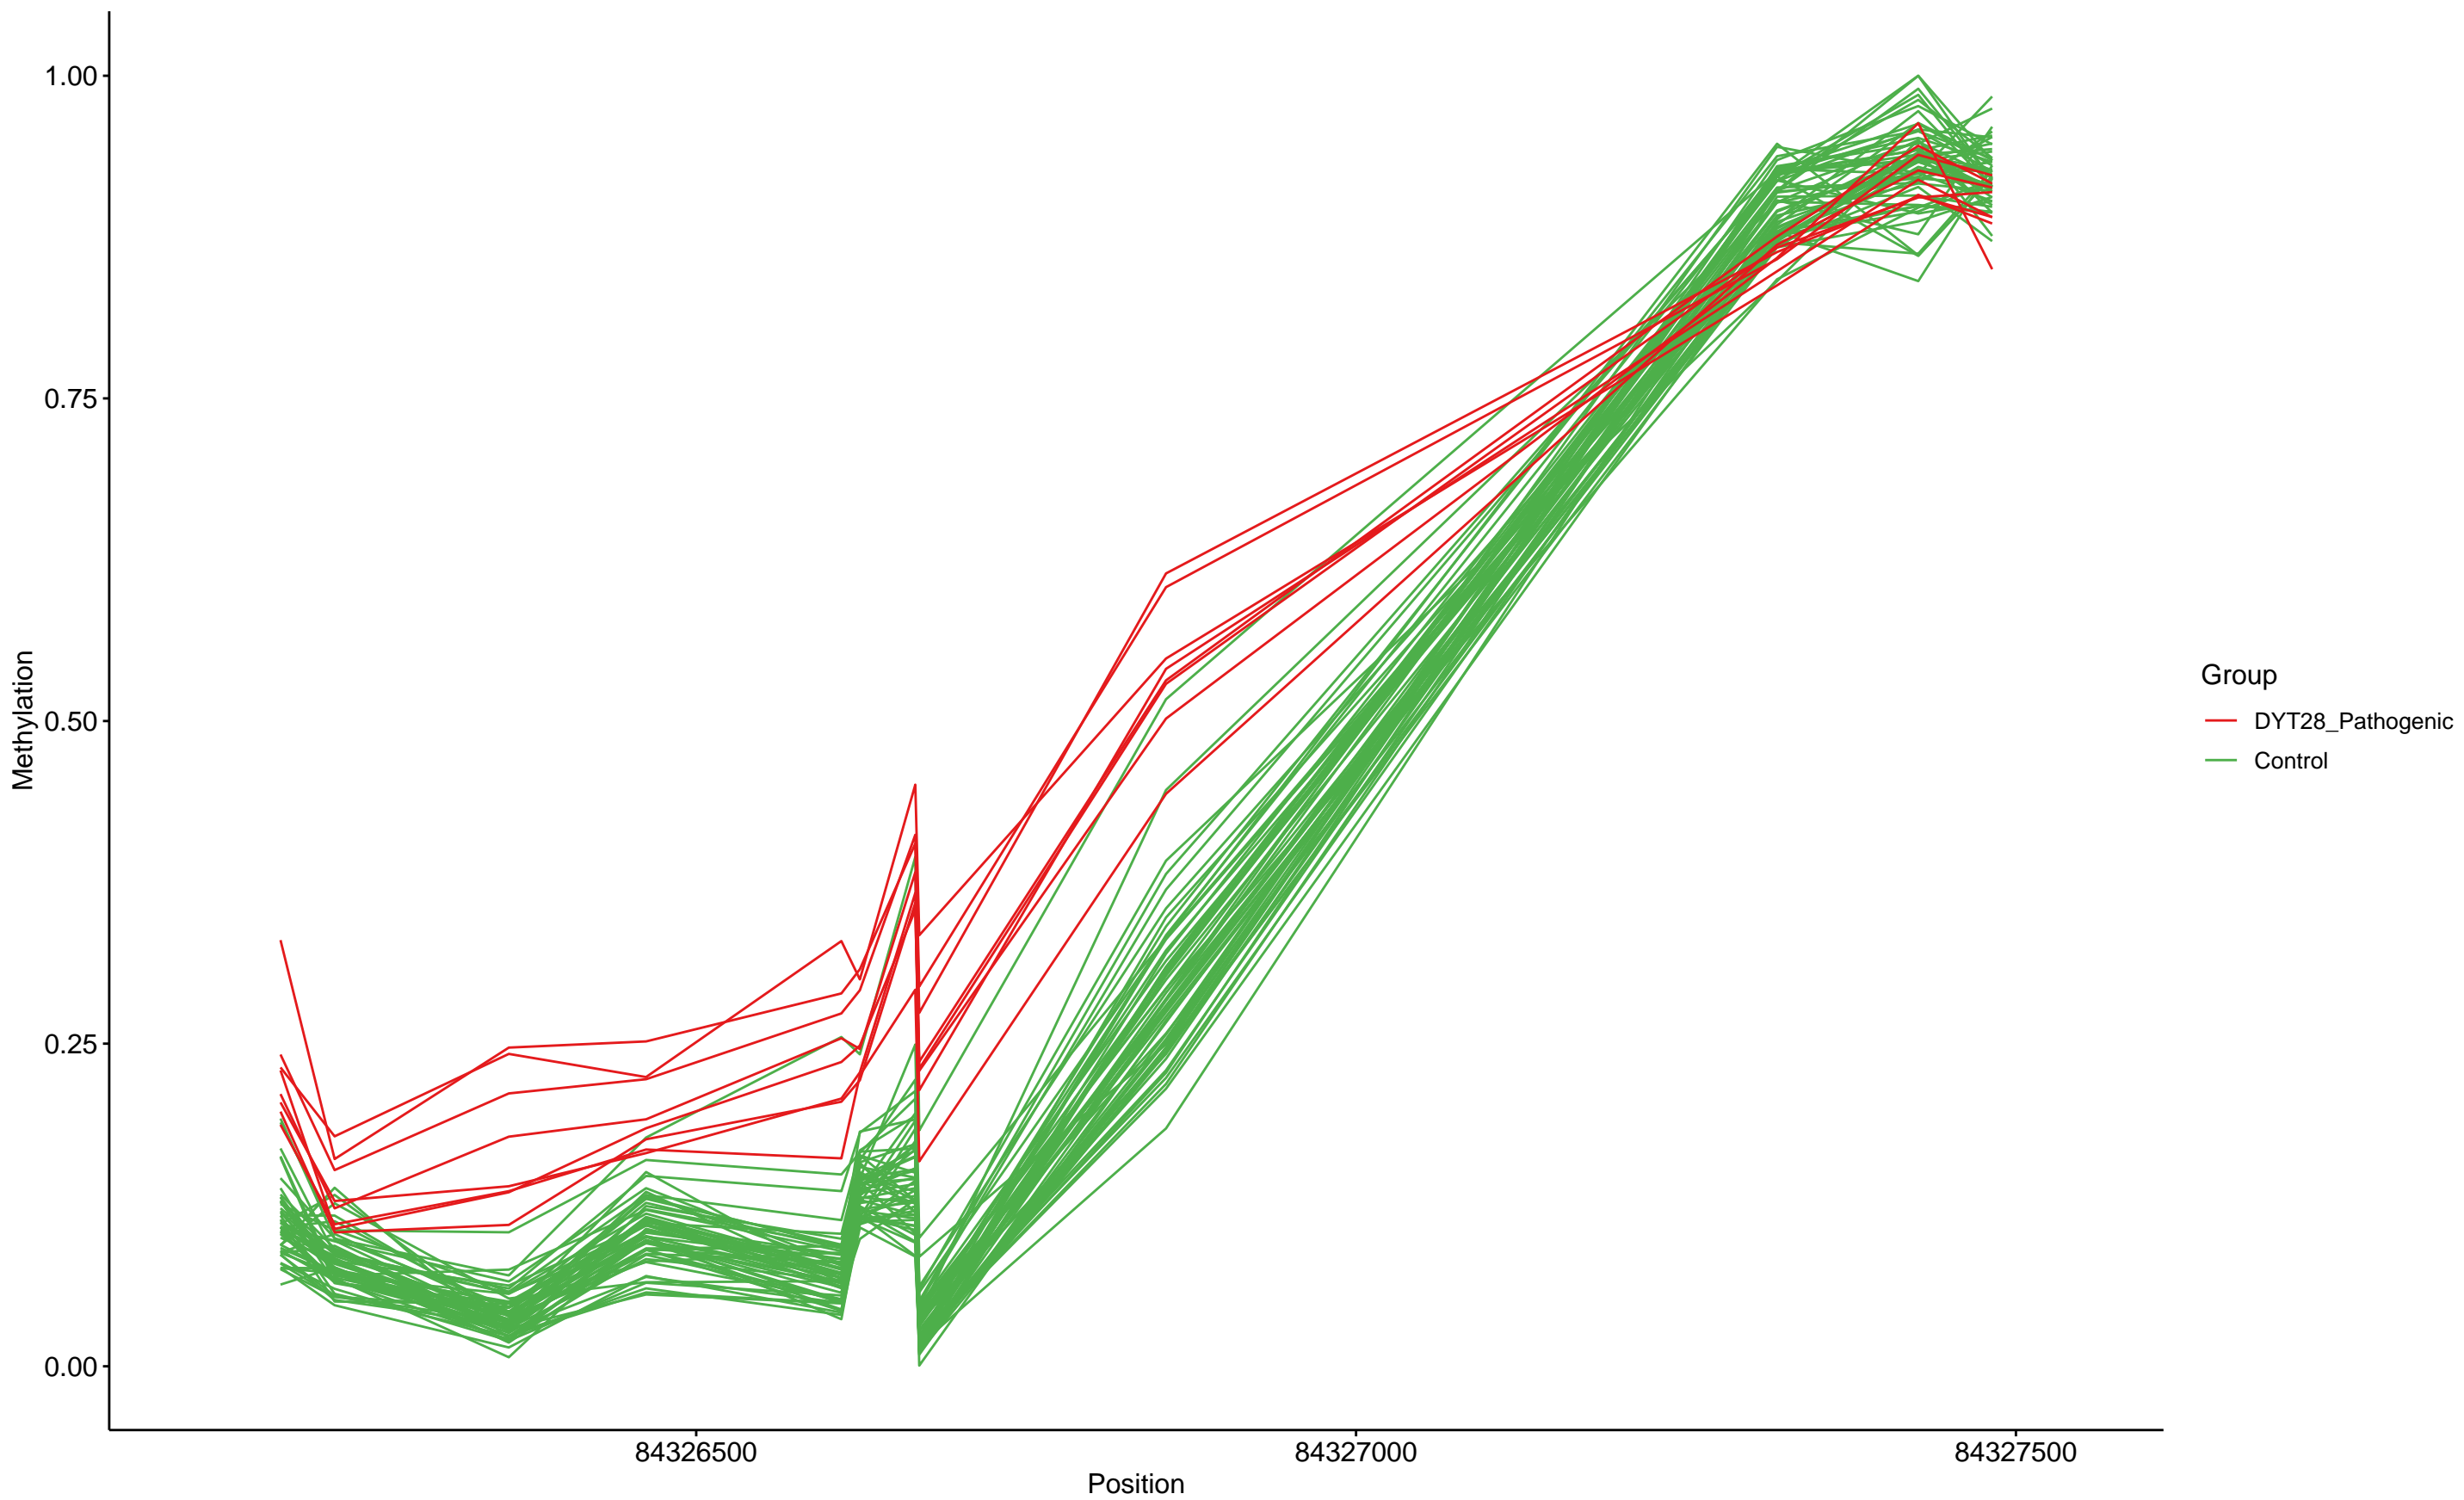

Region 11: chr6:28583971–28584464

Fisher:  $2.94735809897005e-74$

Stouffer:  $9.53012645423371e-78$

Mean difference: 0.167356205248983

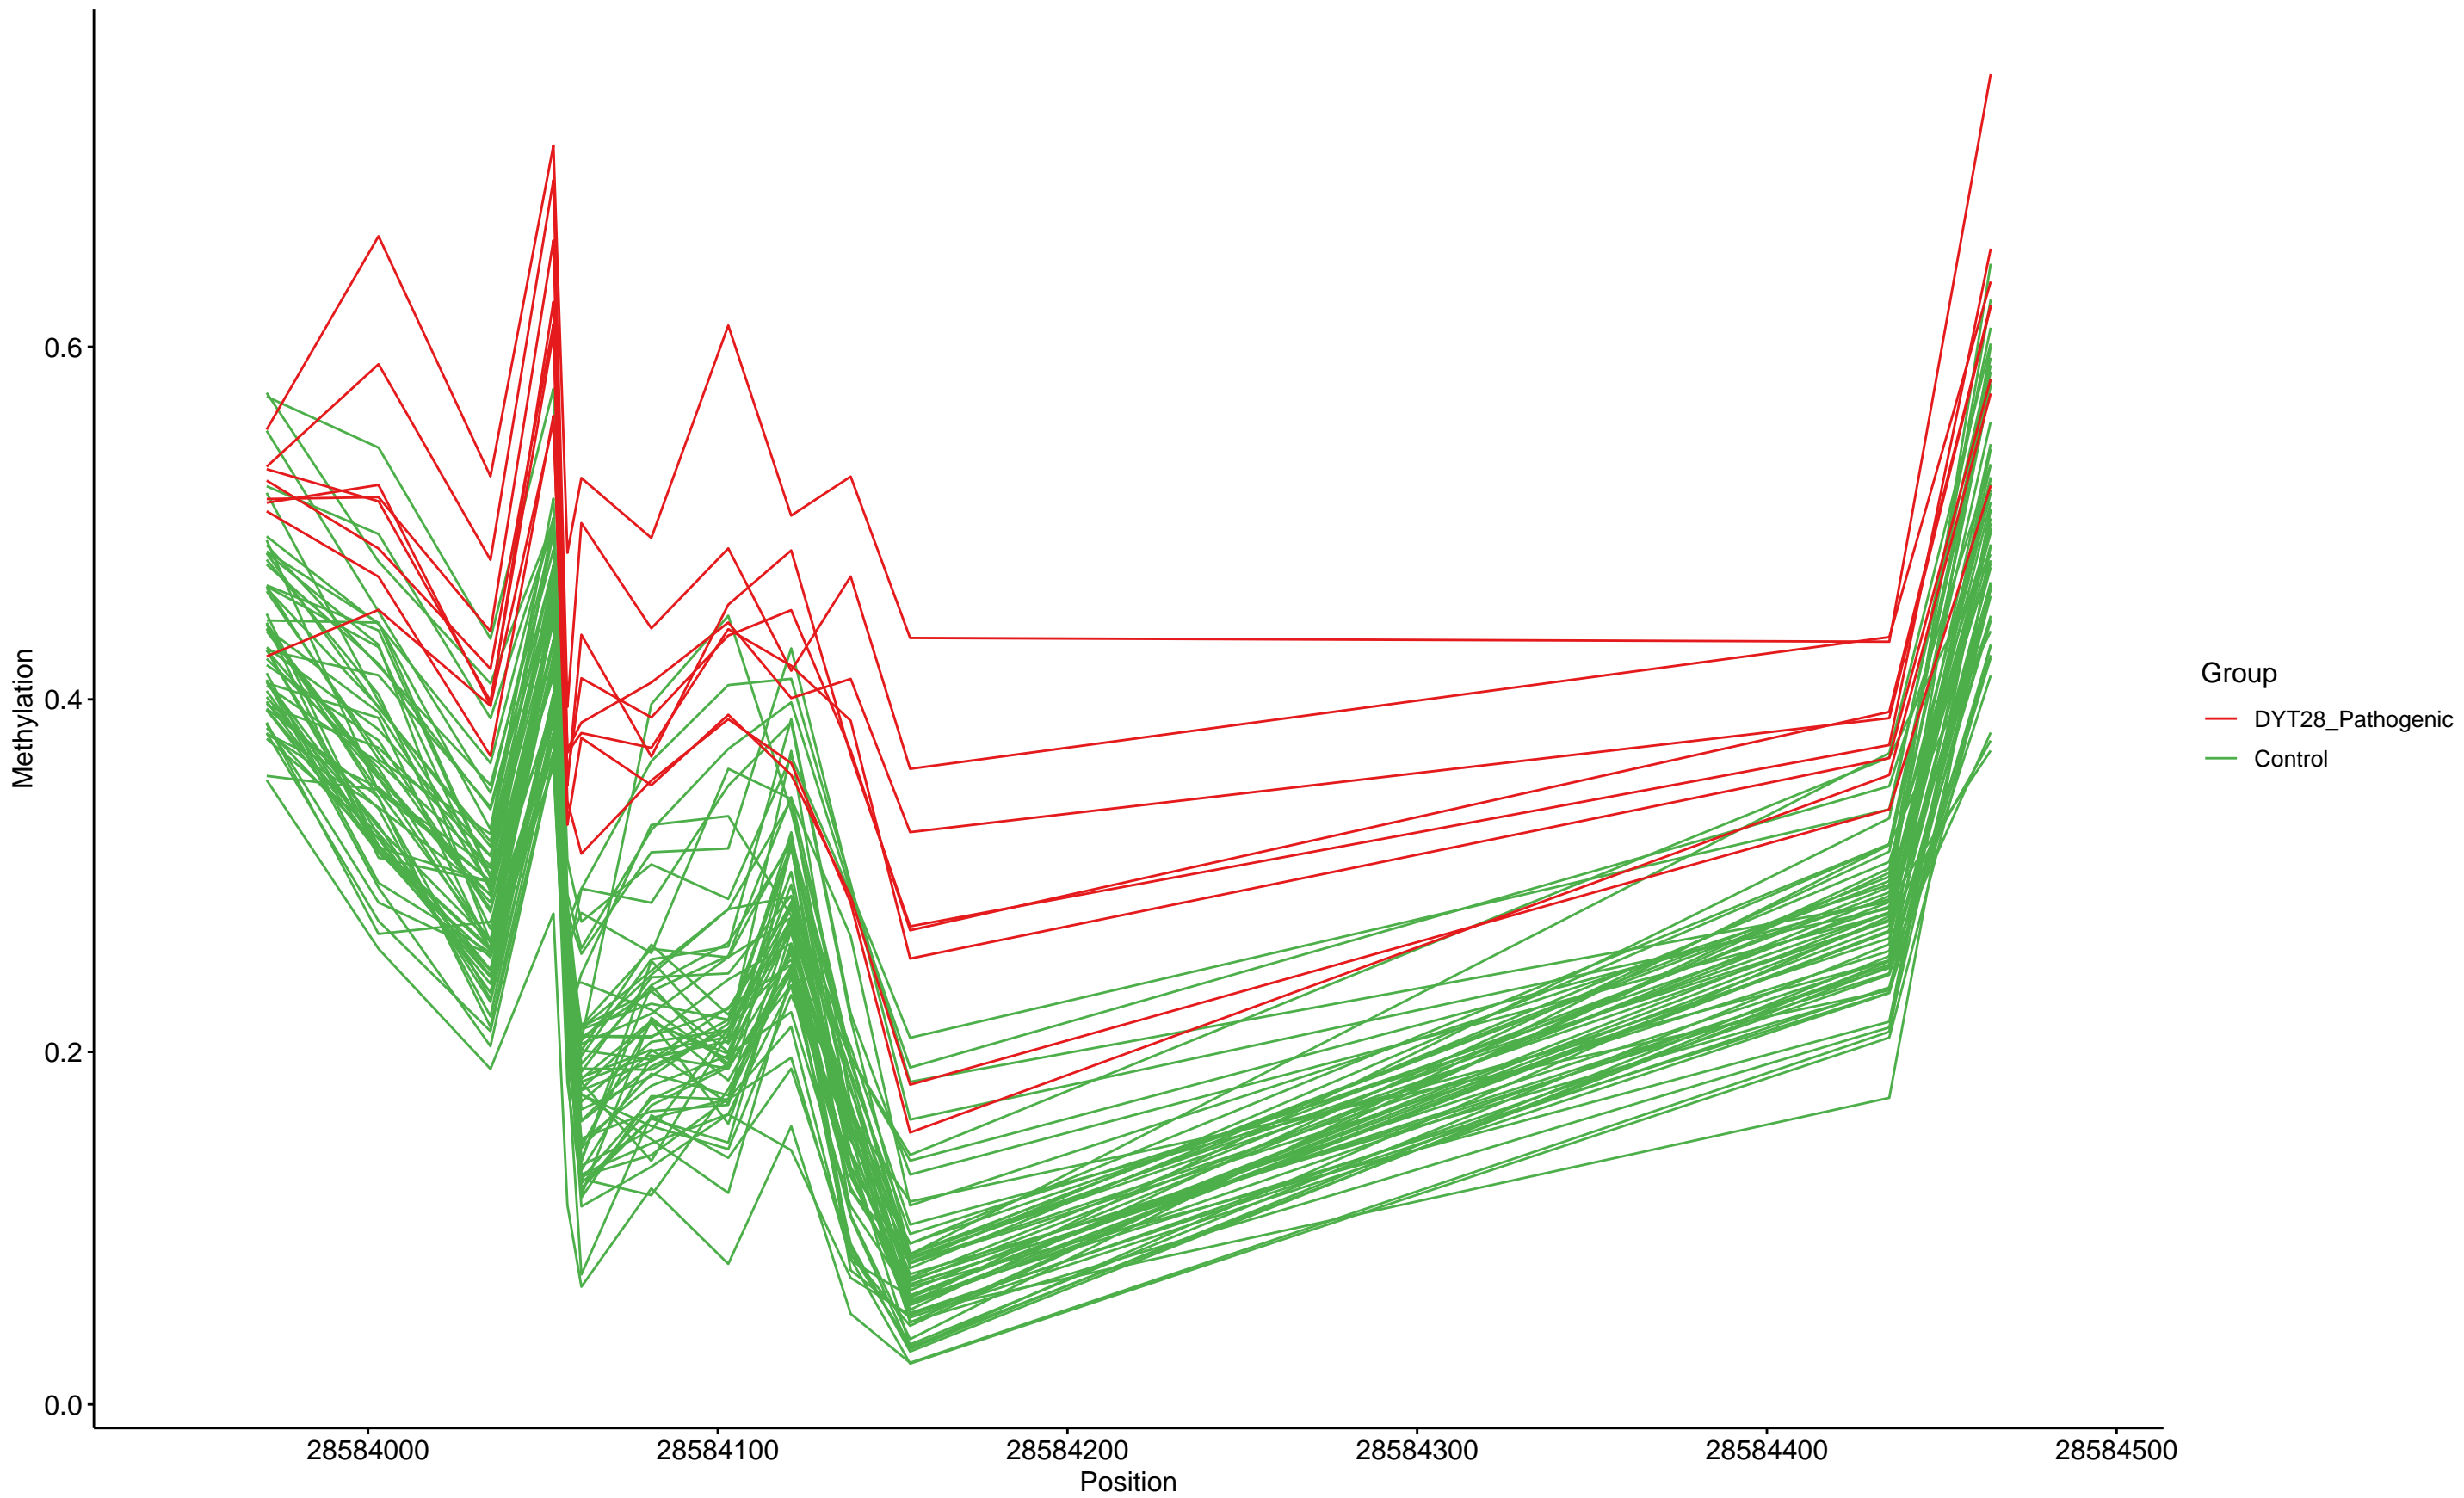

Region 12: chr5:33936171–33938909

Fisher:  $7.13487646375099e-74$

Stouffer:  $1.51882561625306e-72$

Mean difference: 0.102856825749679

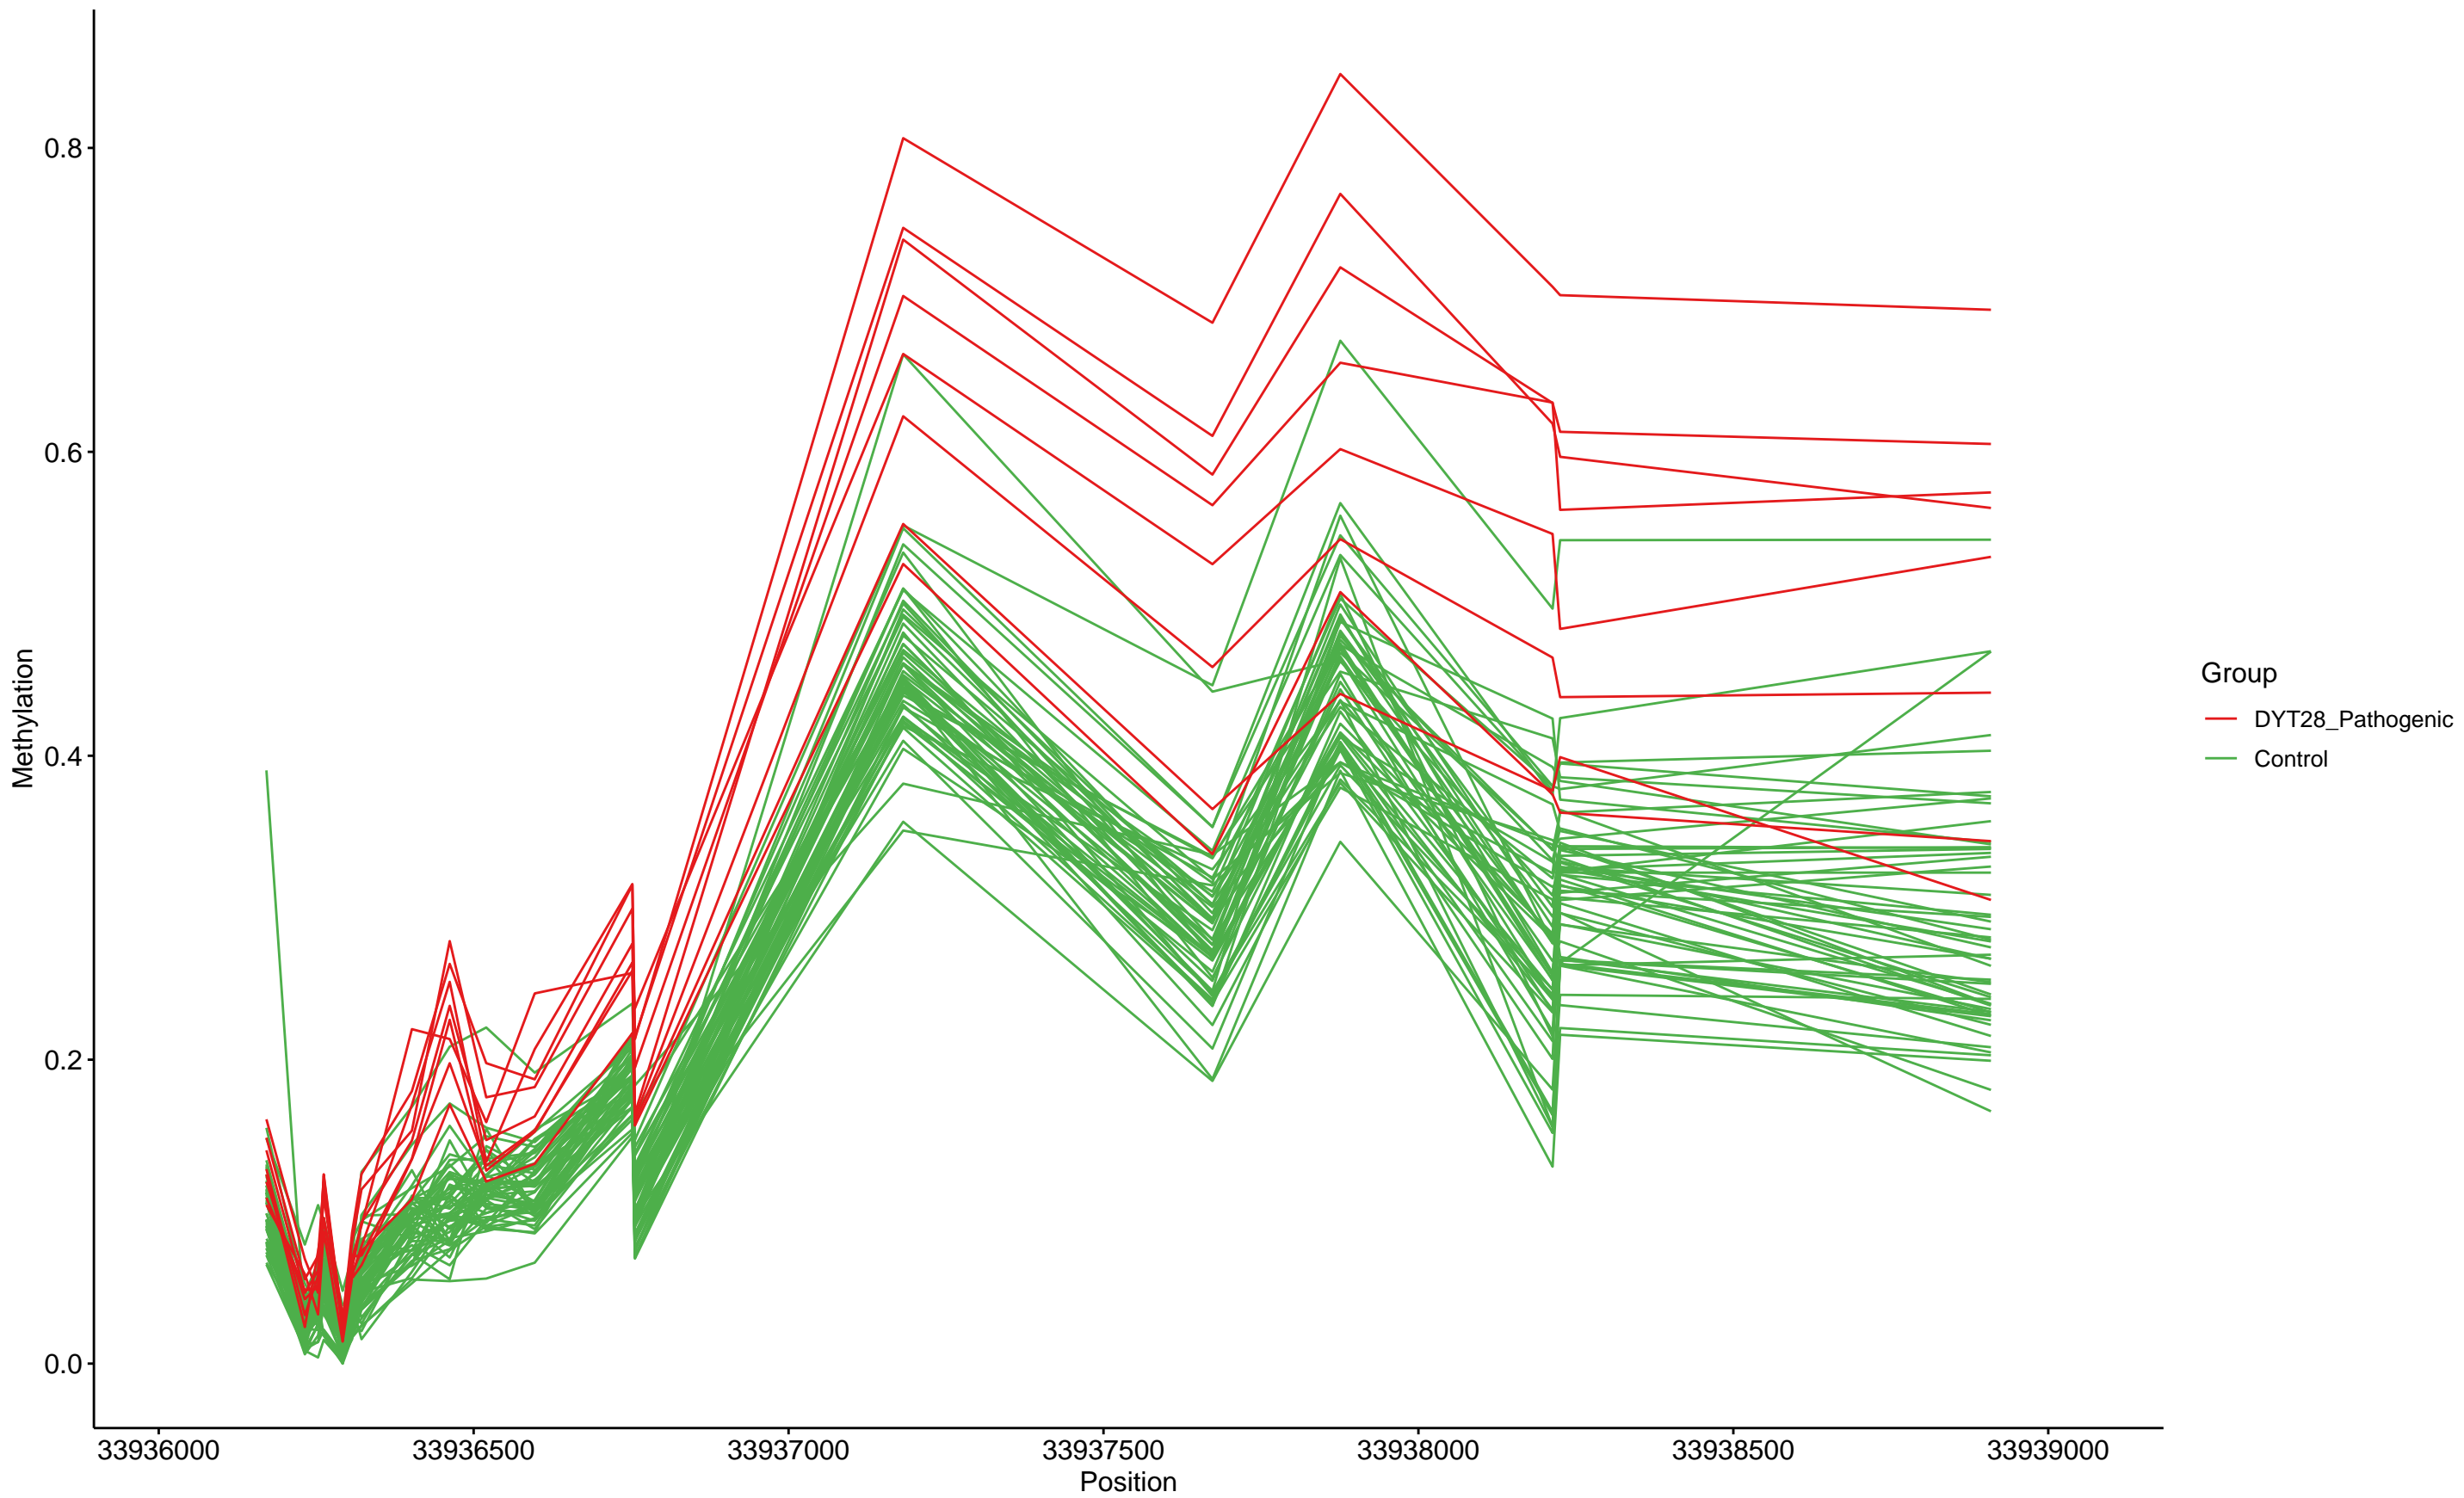



Region 13: chr8:38964297-38965492

Fisher: 3.53021685088629e-71

Stouffer: 1.22304502694469e-65

Mean difference: 0.109095964033353

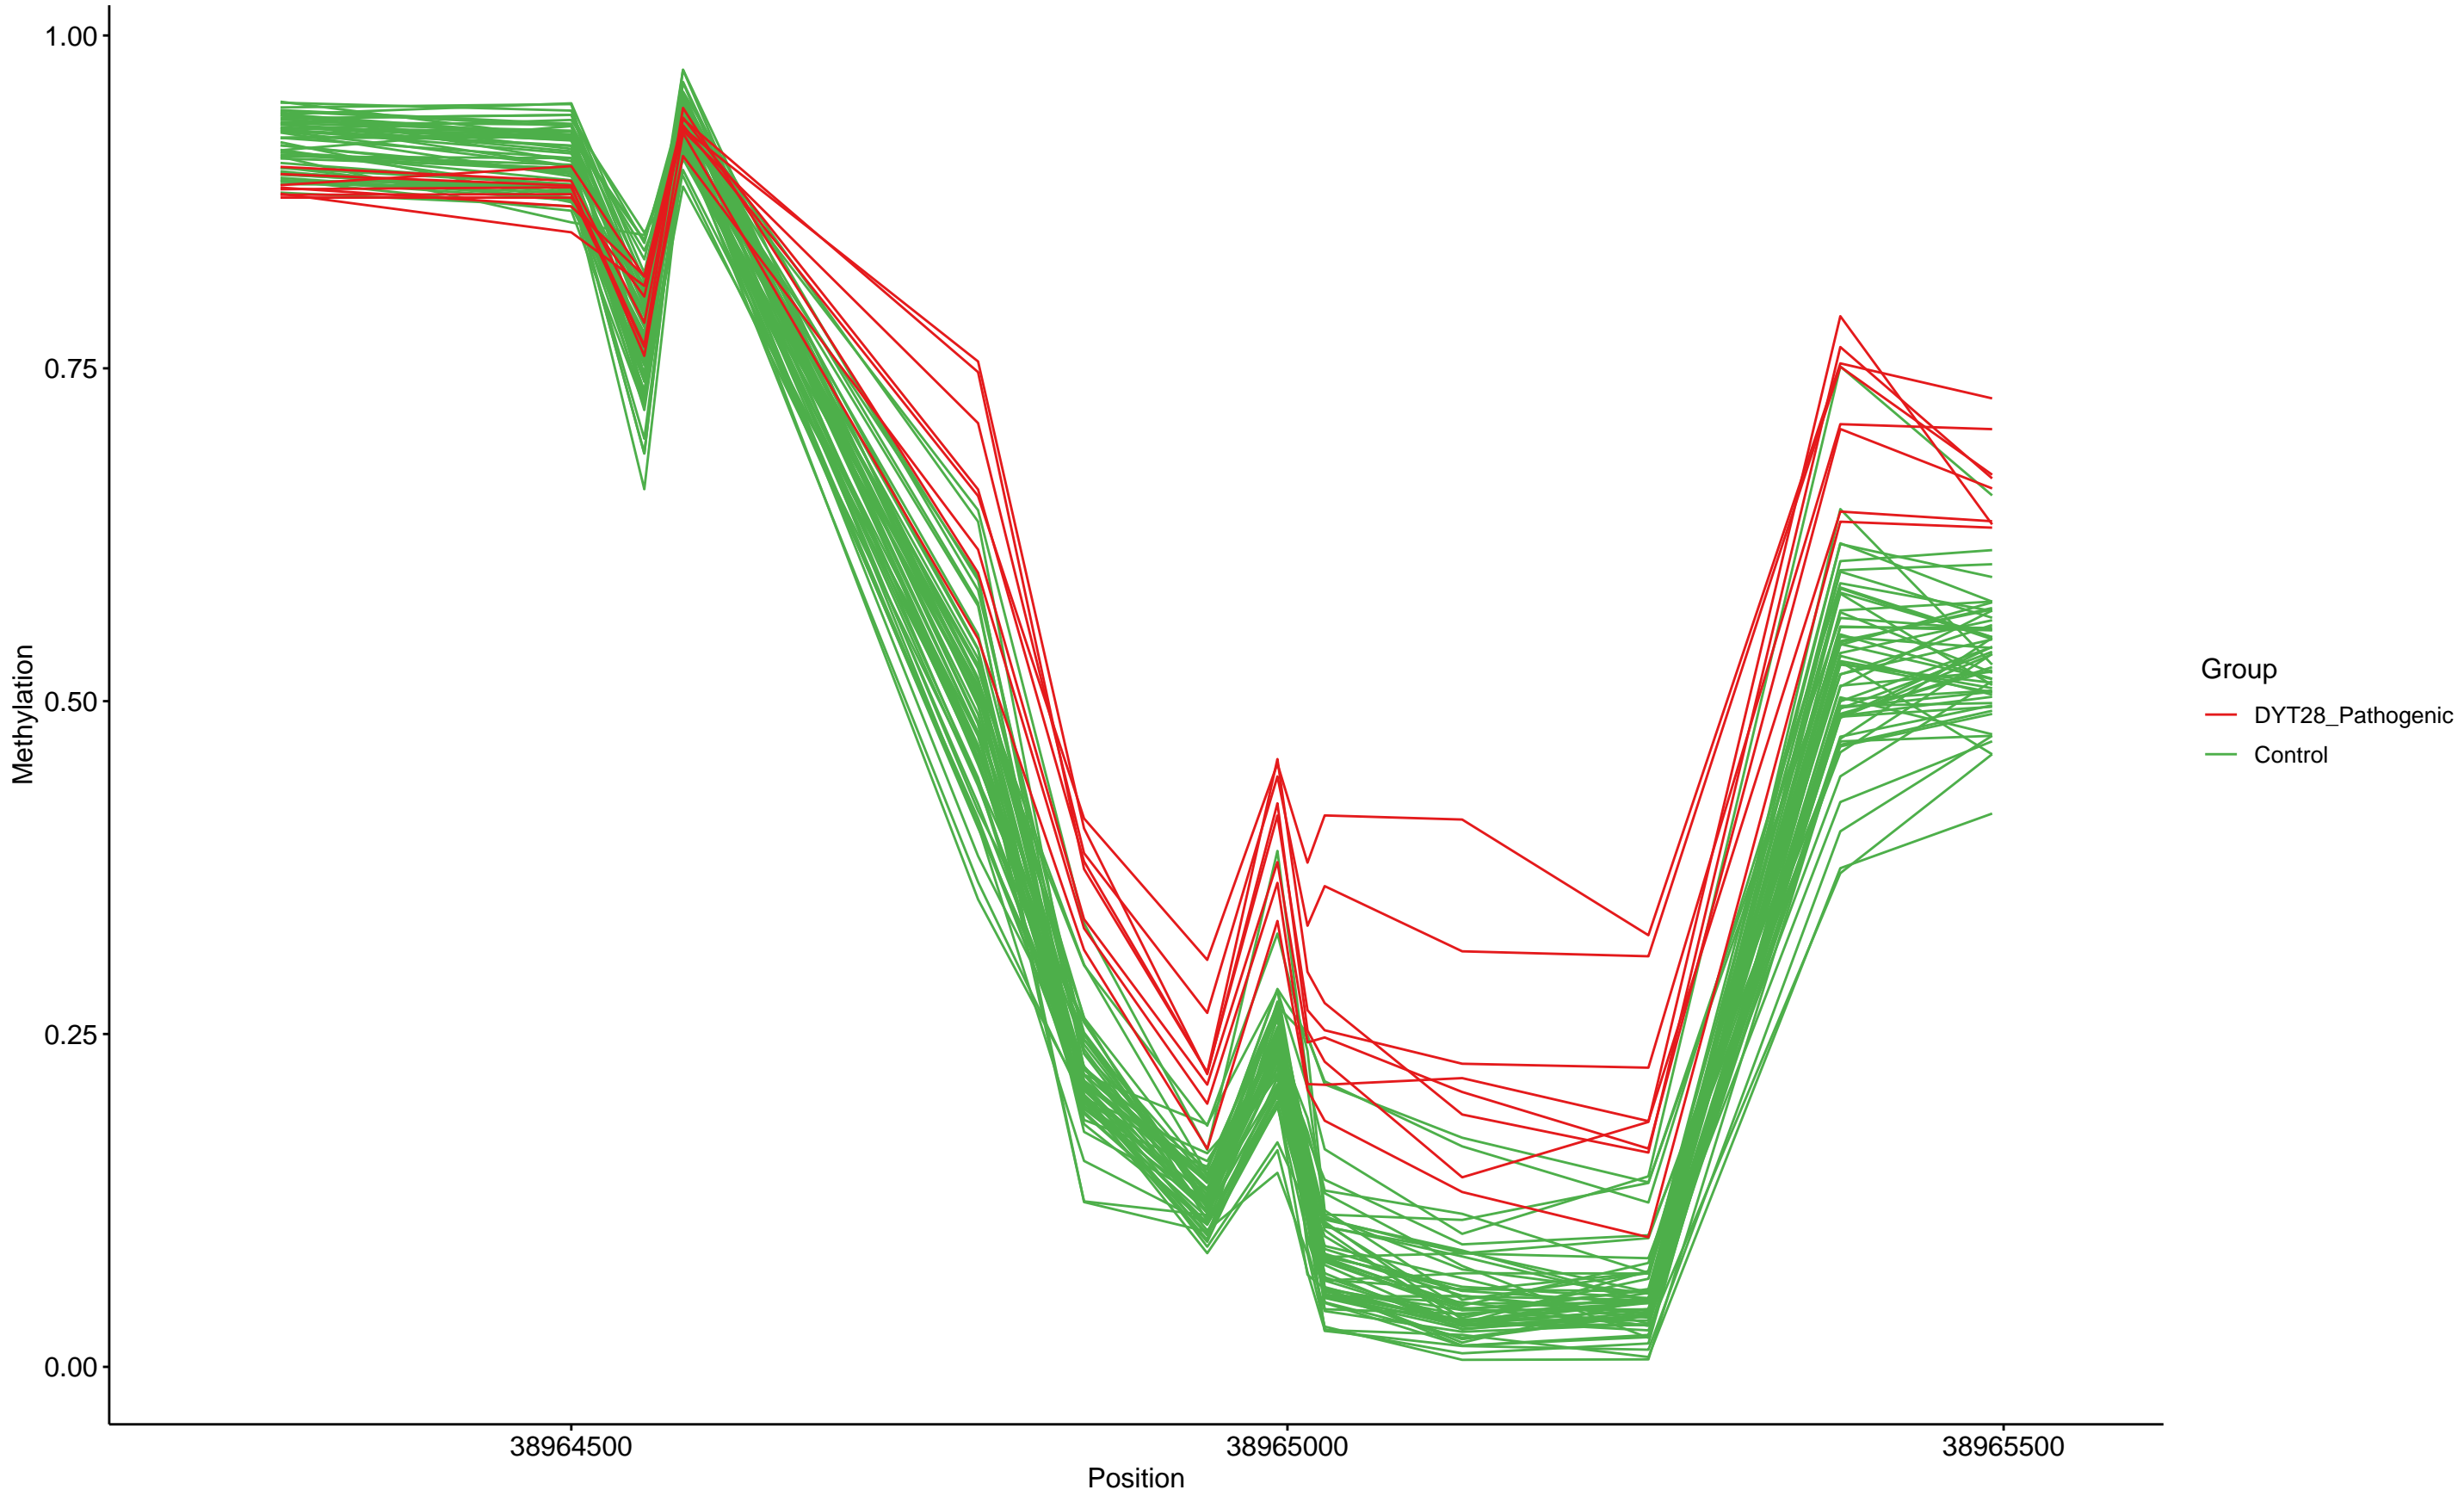

Region 14: chr11:15093744–15096341

Fisher: 8.02781251960469e-70

Stouffer: 6.74985992424857e-64

Mean difference: 0.117274540089369

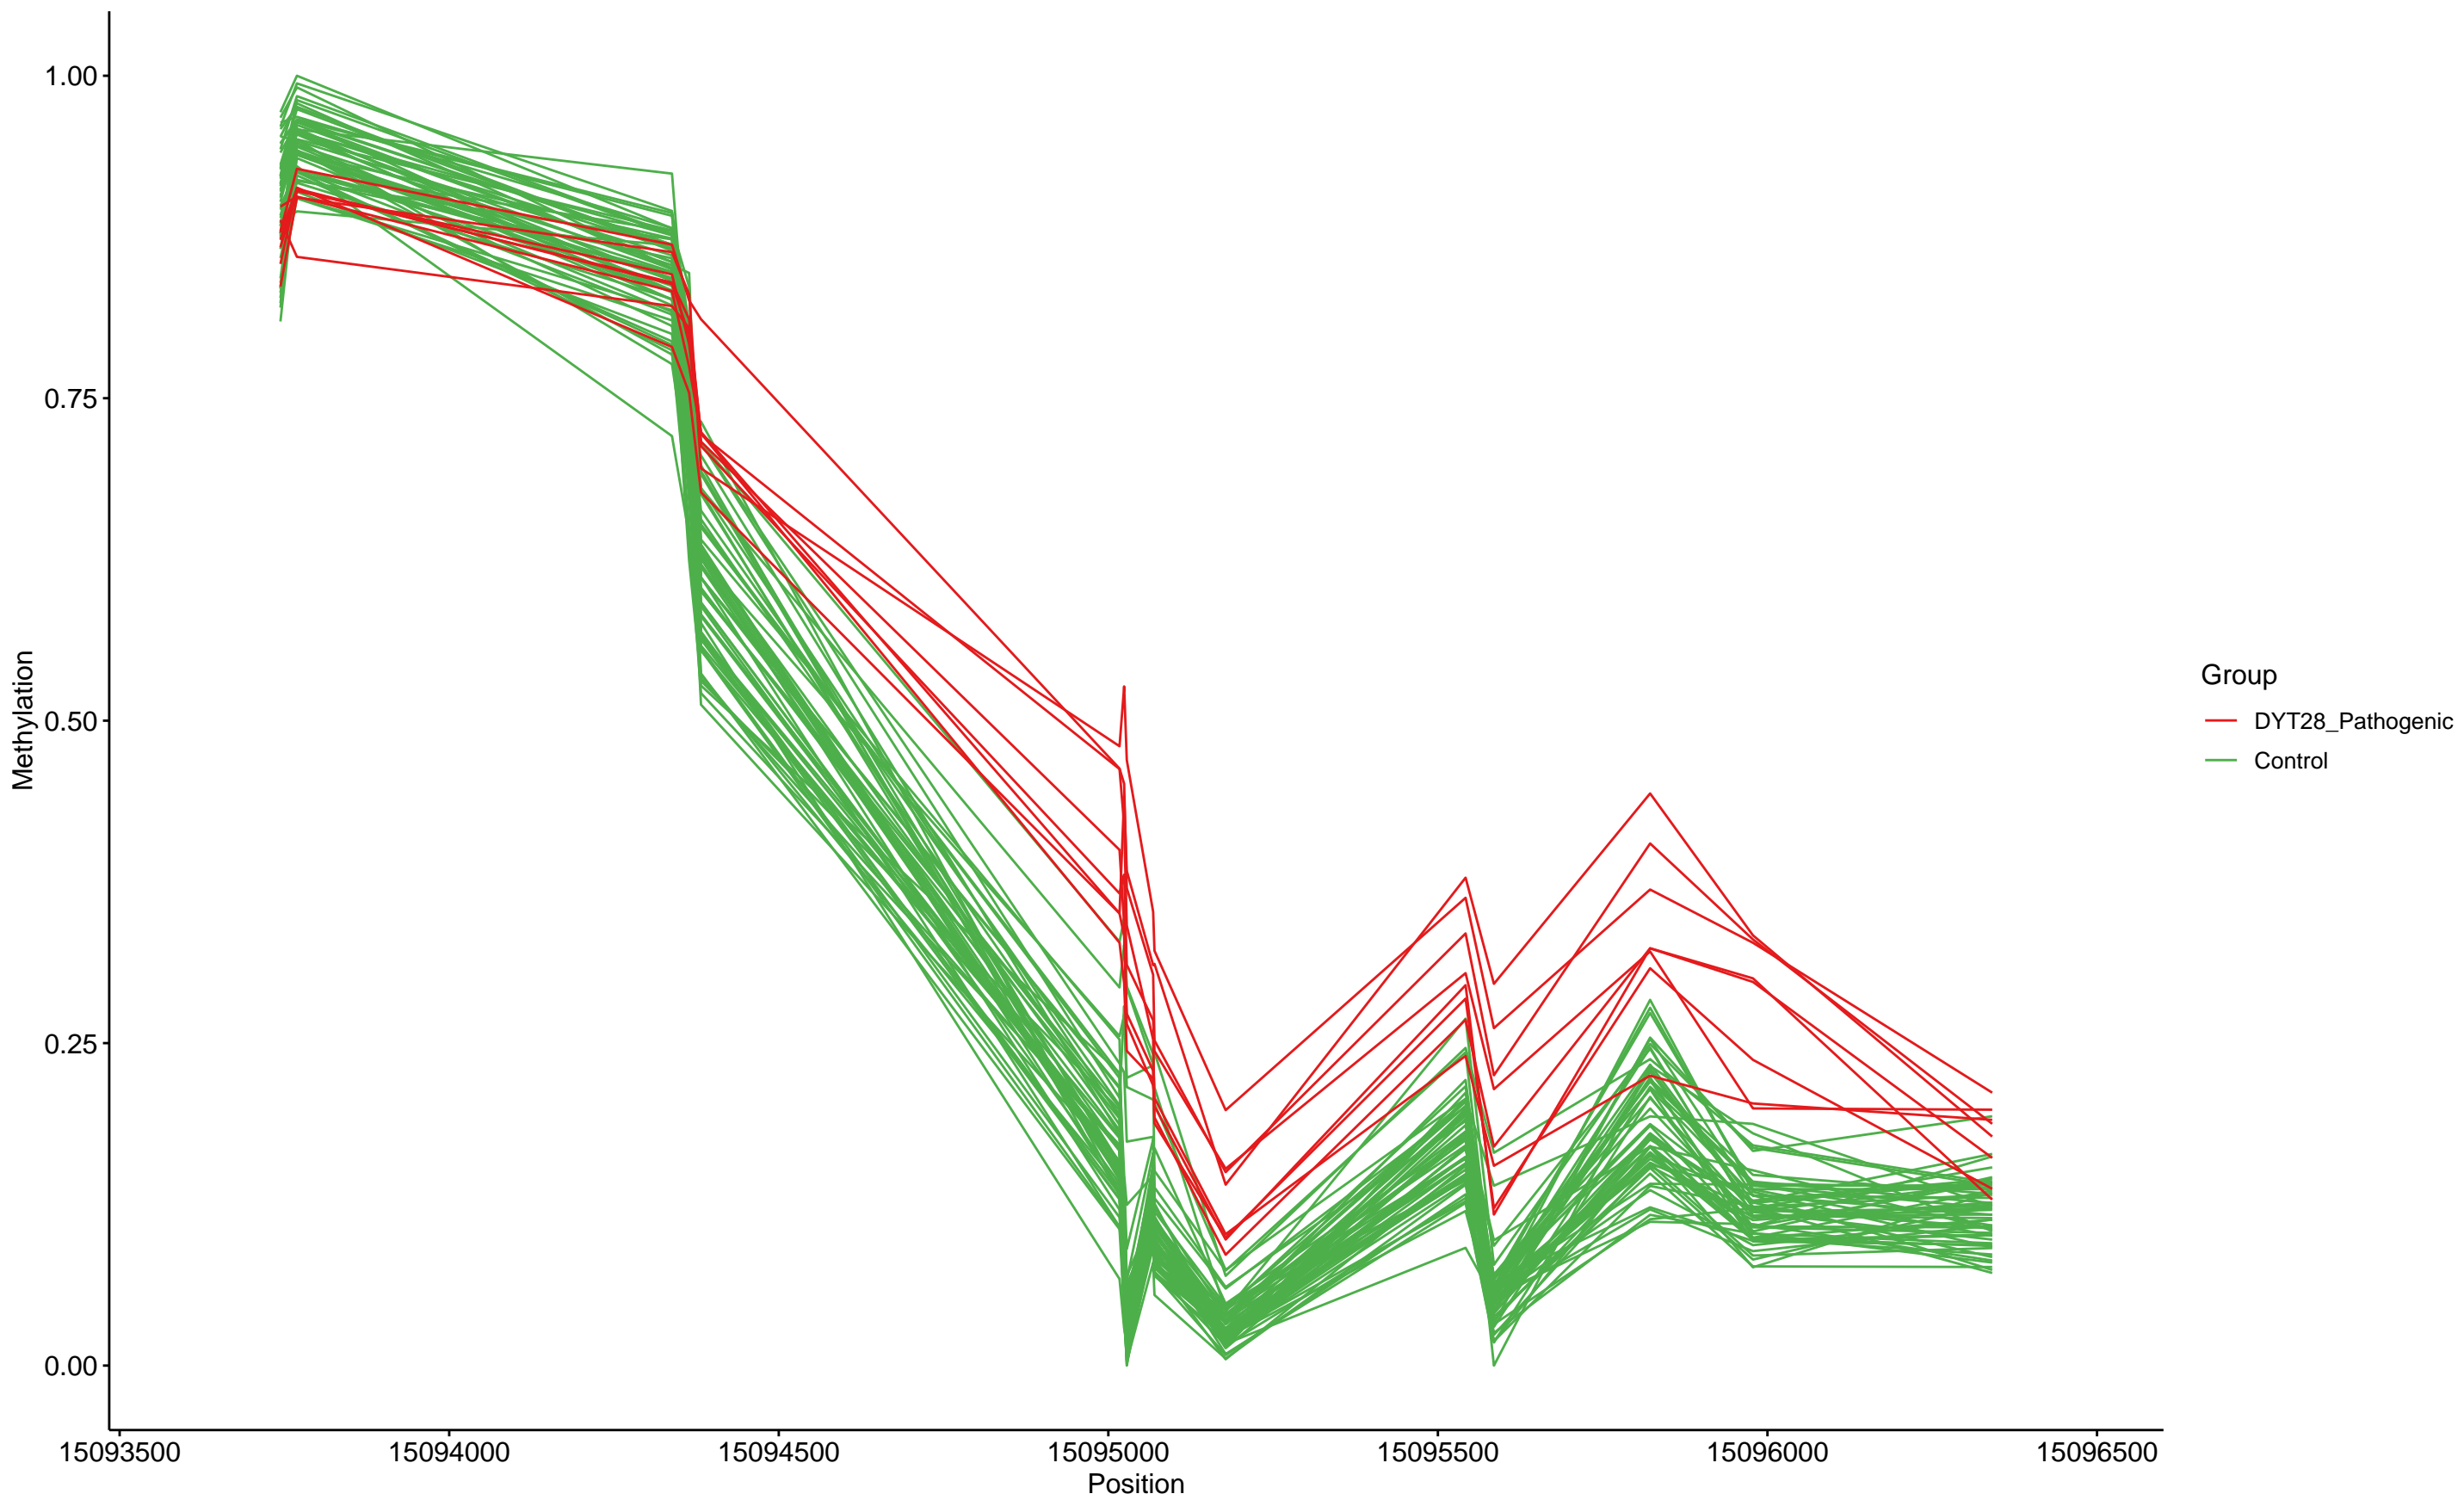

Region 15: chr6:27635558–27638391

Fisher: 1.10526278434338e-67

Stouffer: 6.06902840439401e-65

Mean difference: 0.149490228940492

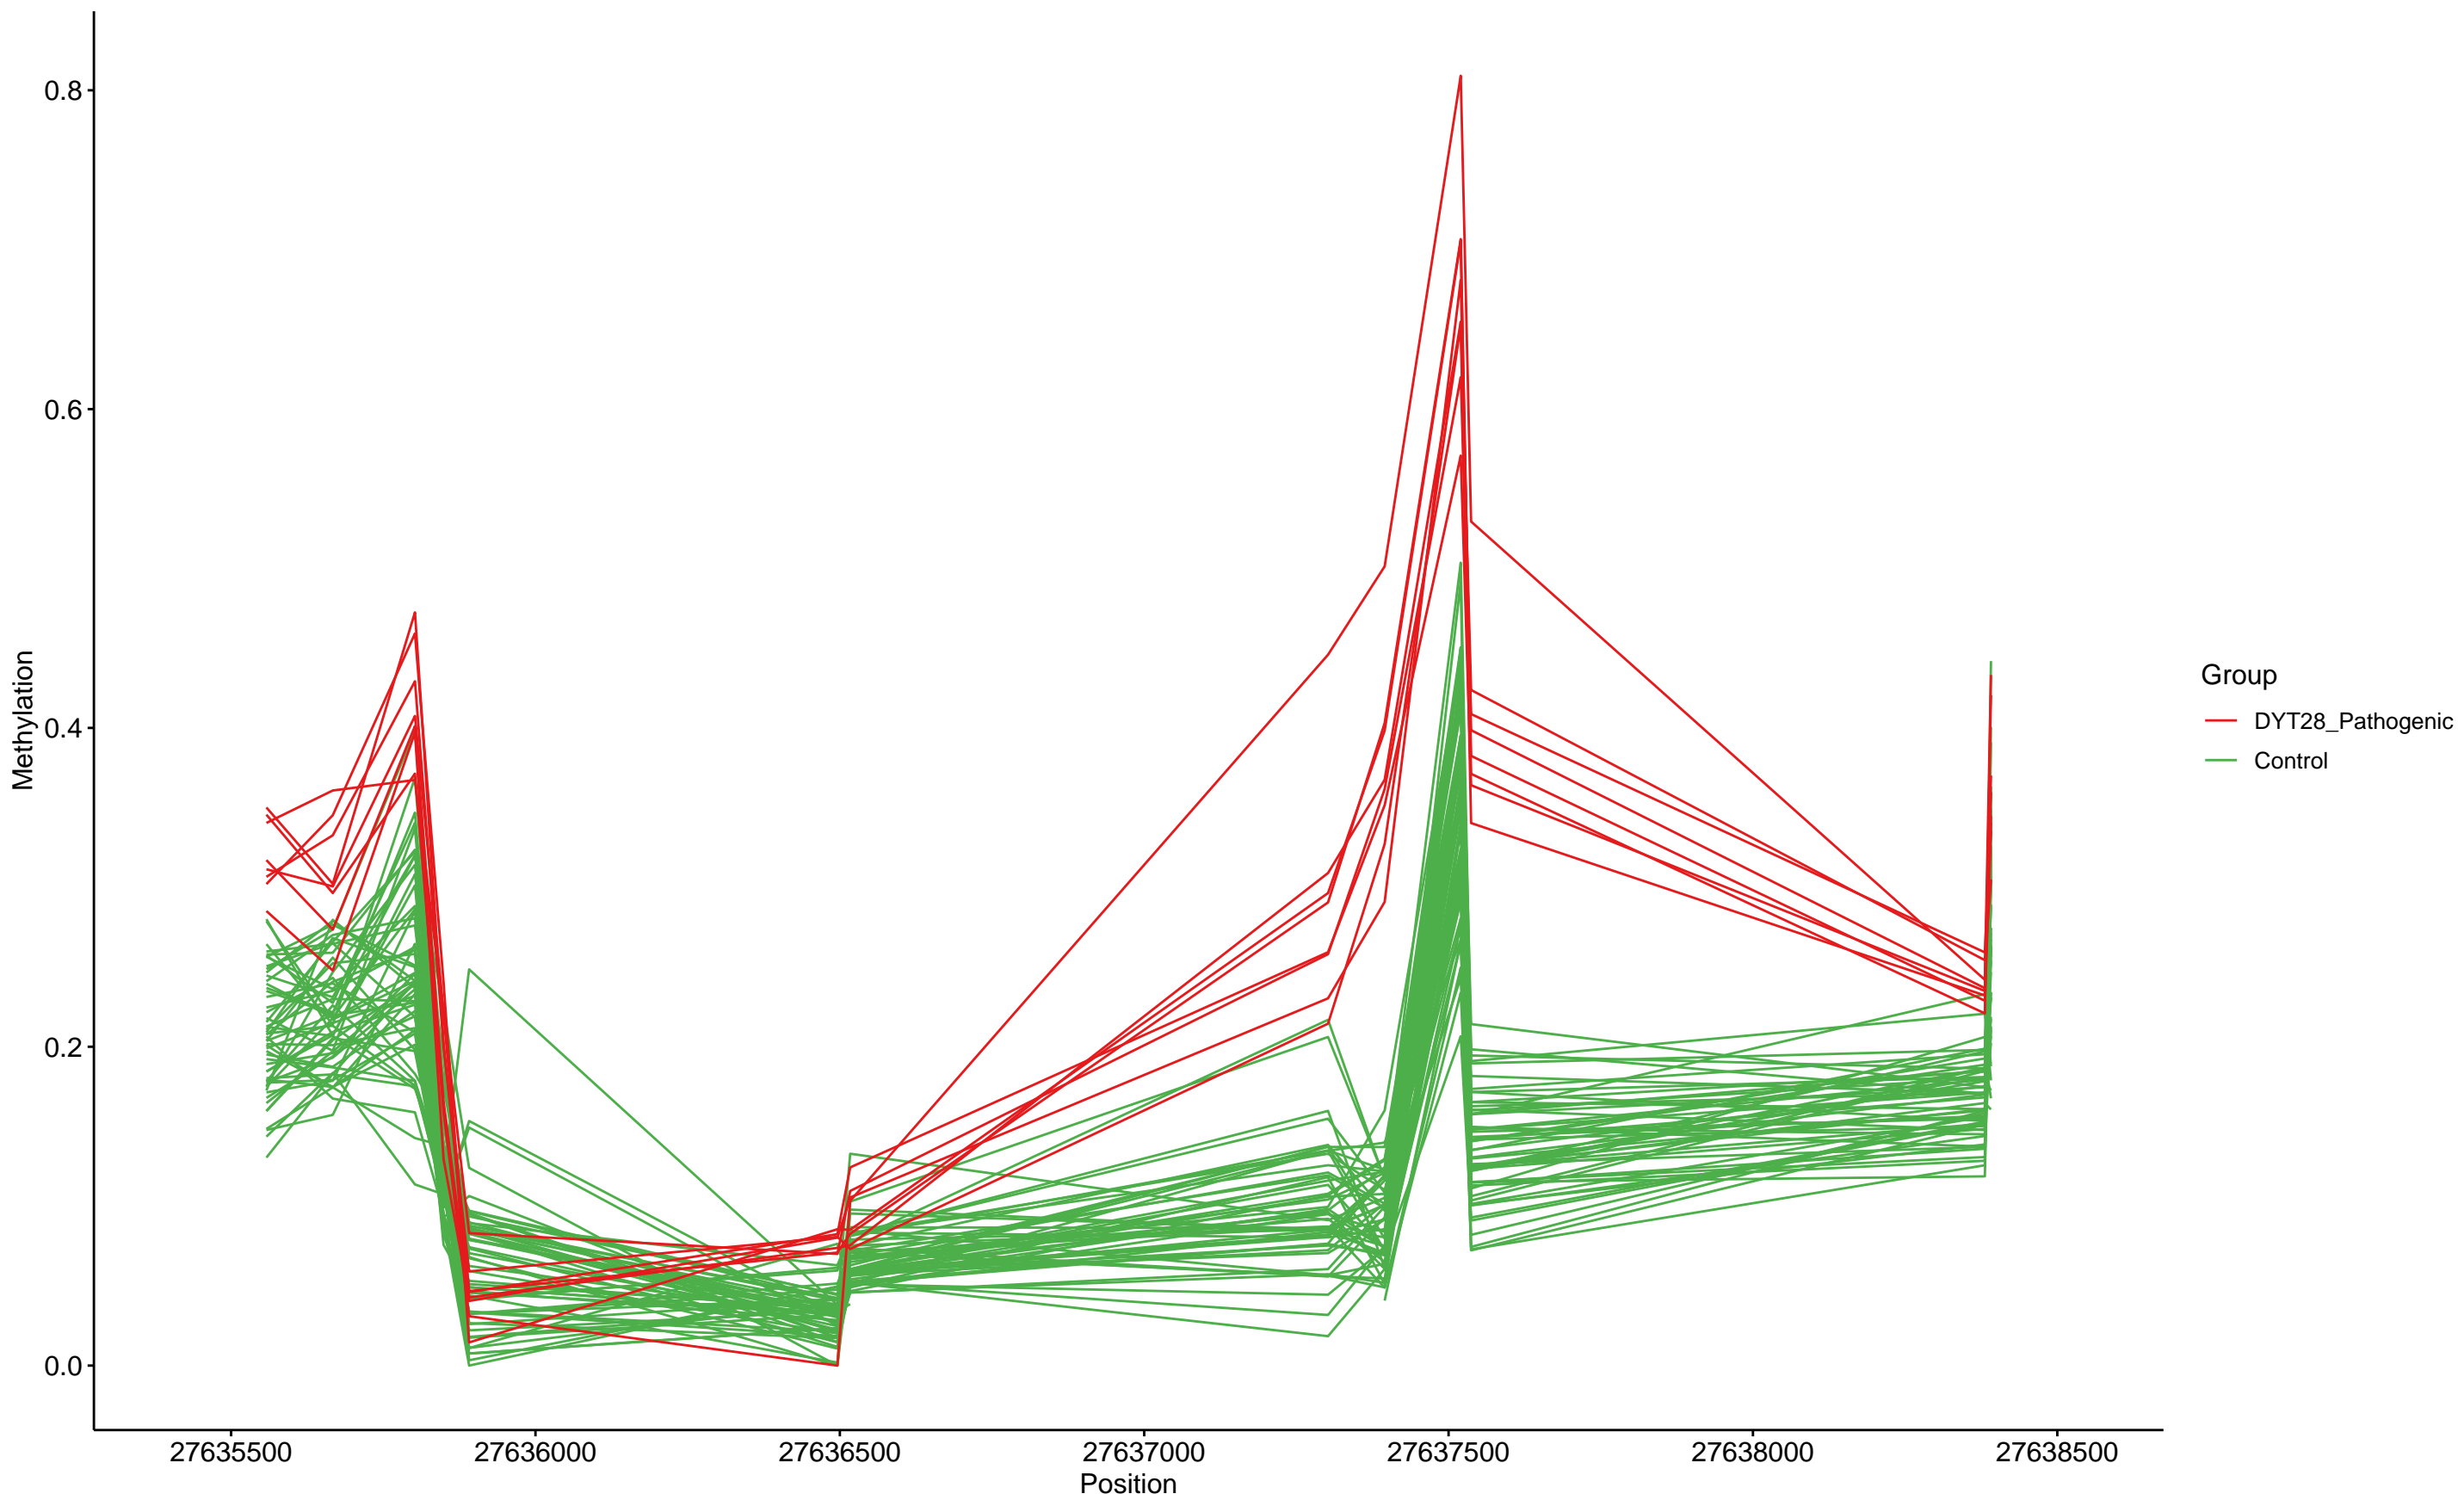

Region 16: chr2:75937132-75938721

Fisher: 2.71558395059359e-67

Stouffer: 9.7019416783507e-62

Mean difference: 0.105183063054266

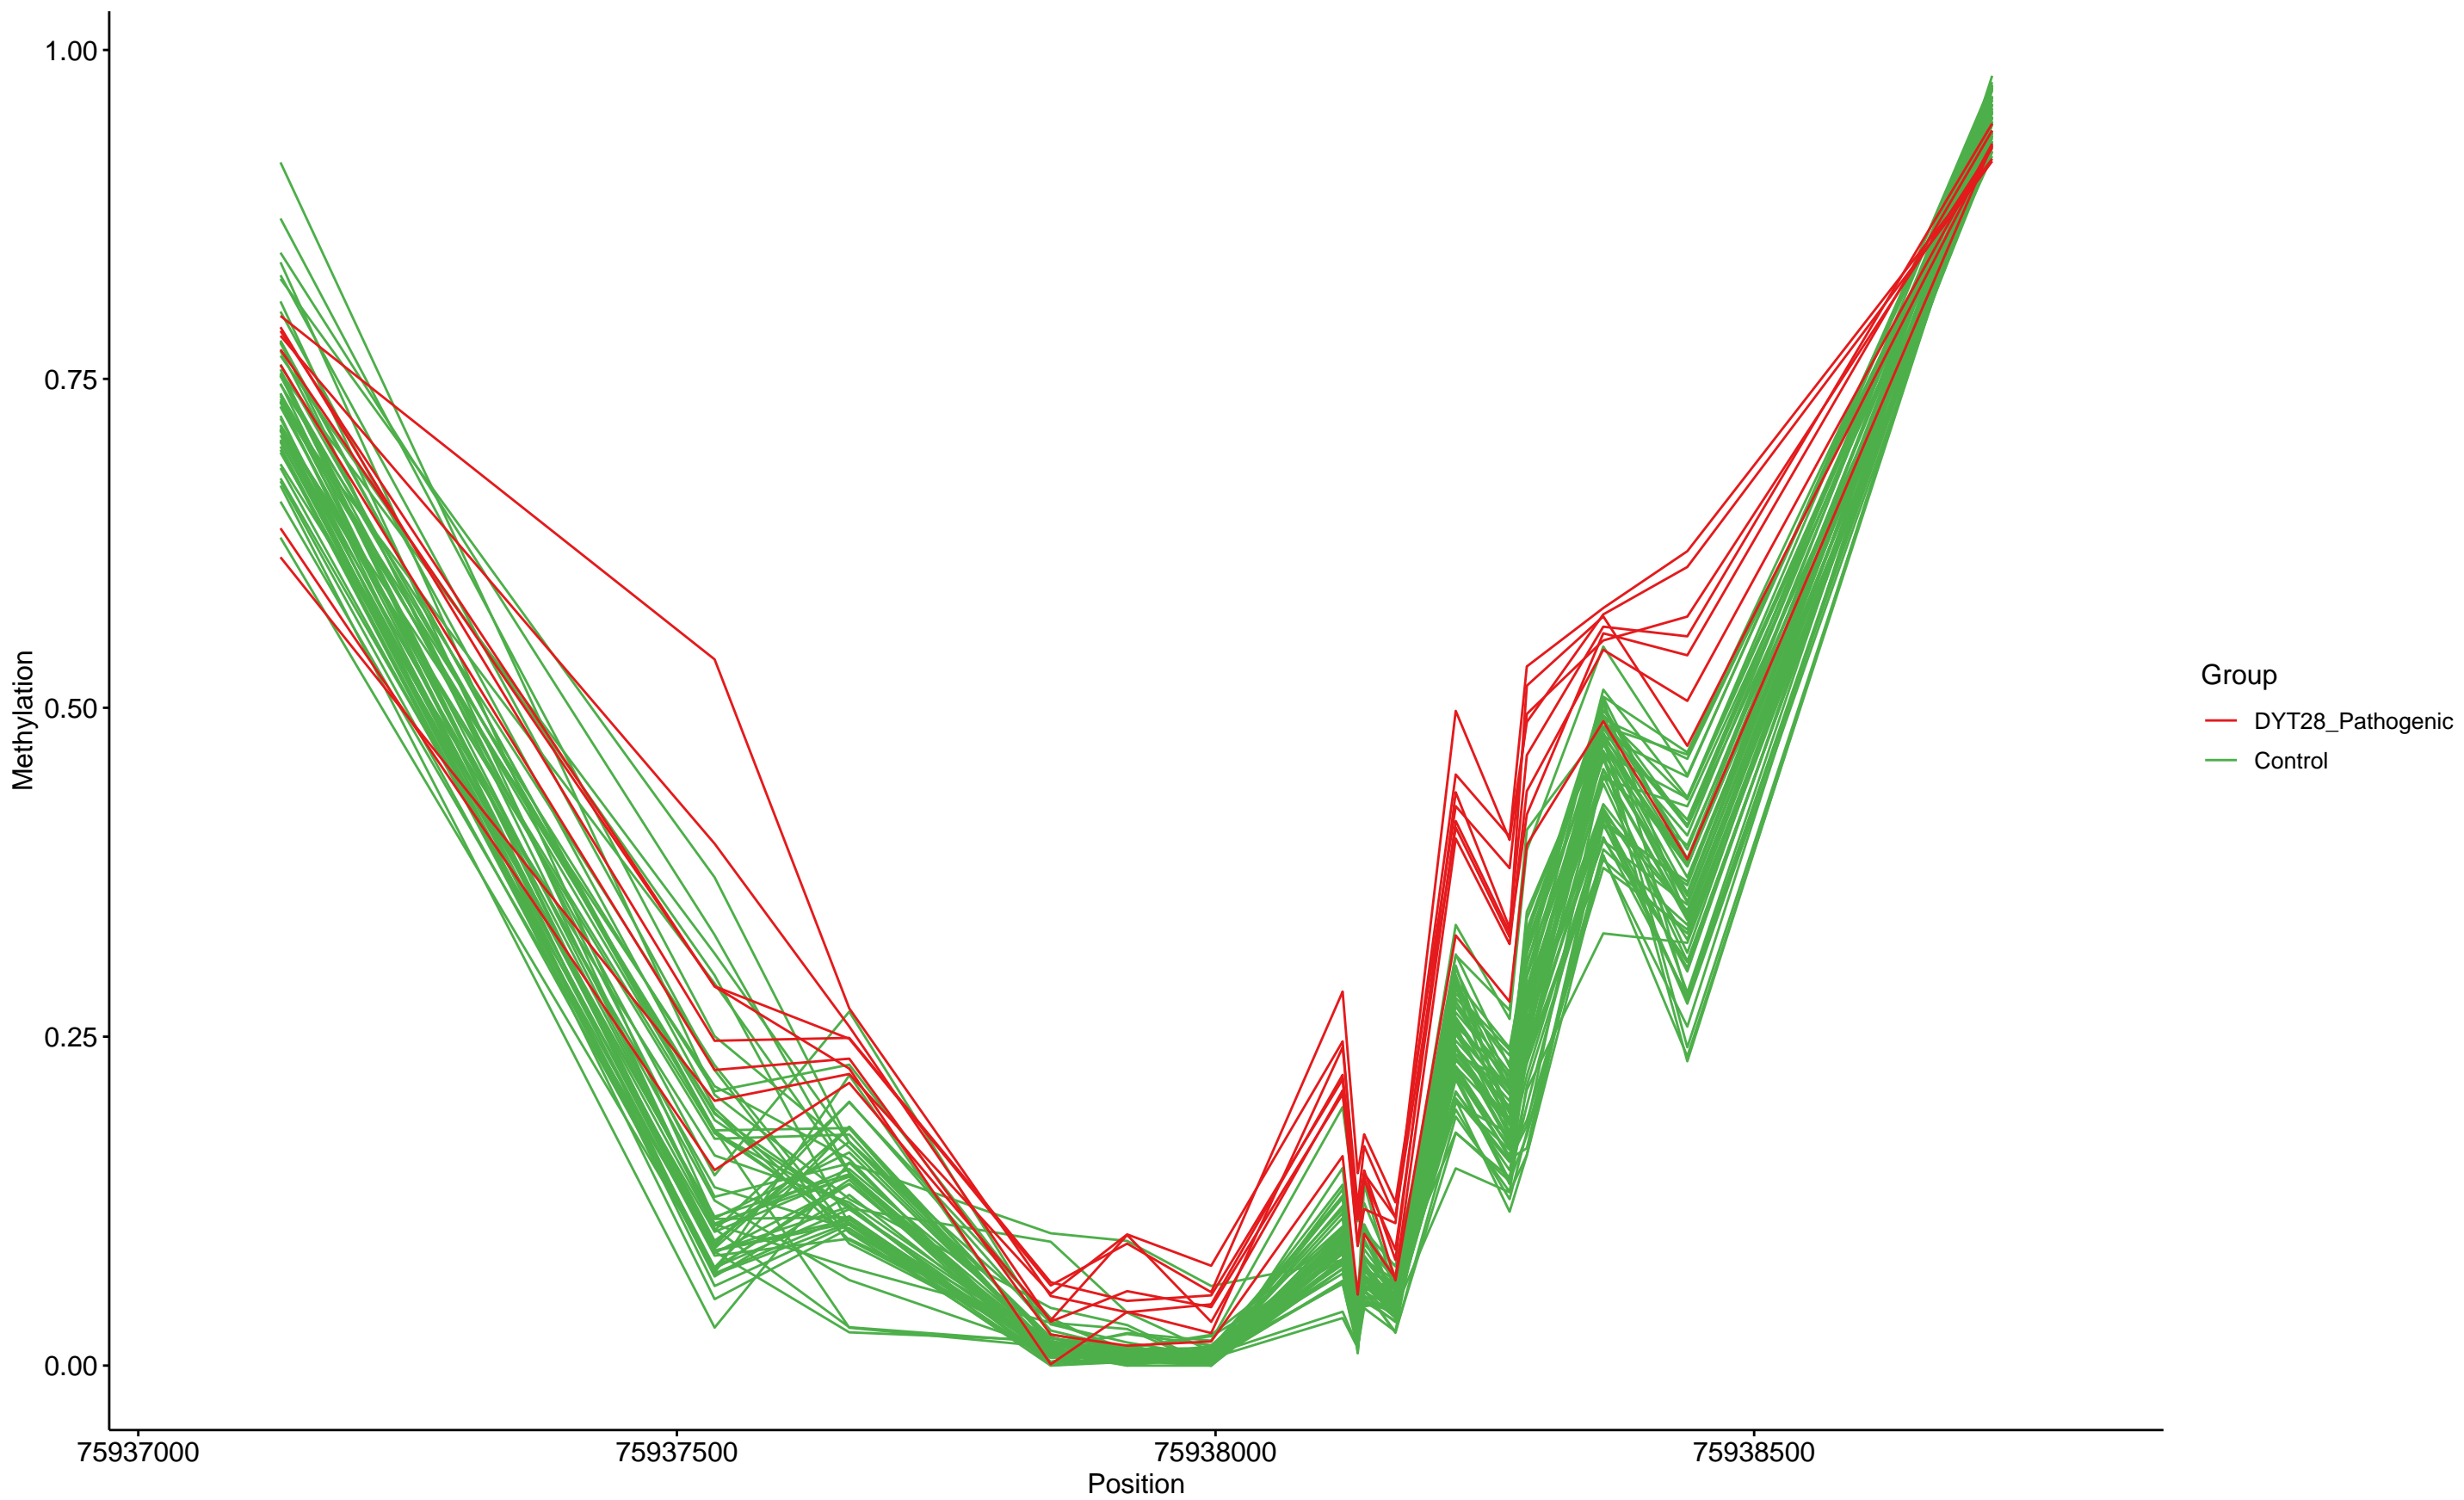



Region 17: chr17:37024042–37027030

Fisher: 6.17920059879548e-67

Stouffer: 5.78066255615958e-43

Mean difference: 0.106115411830427

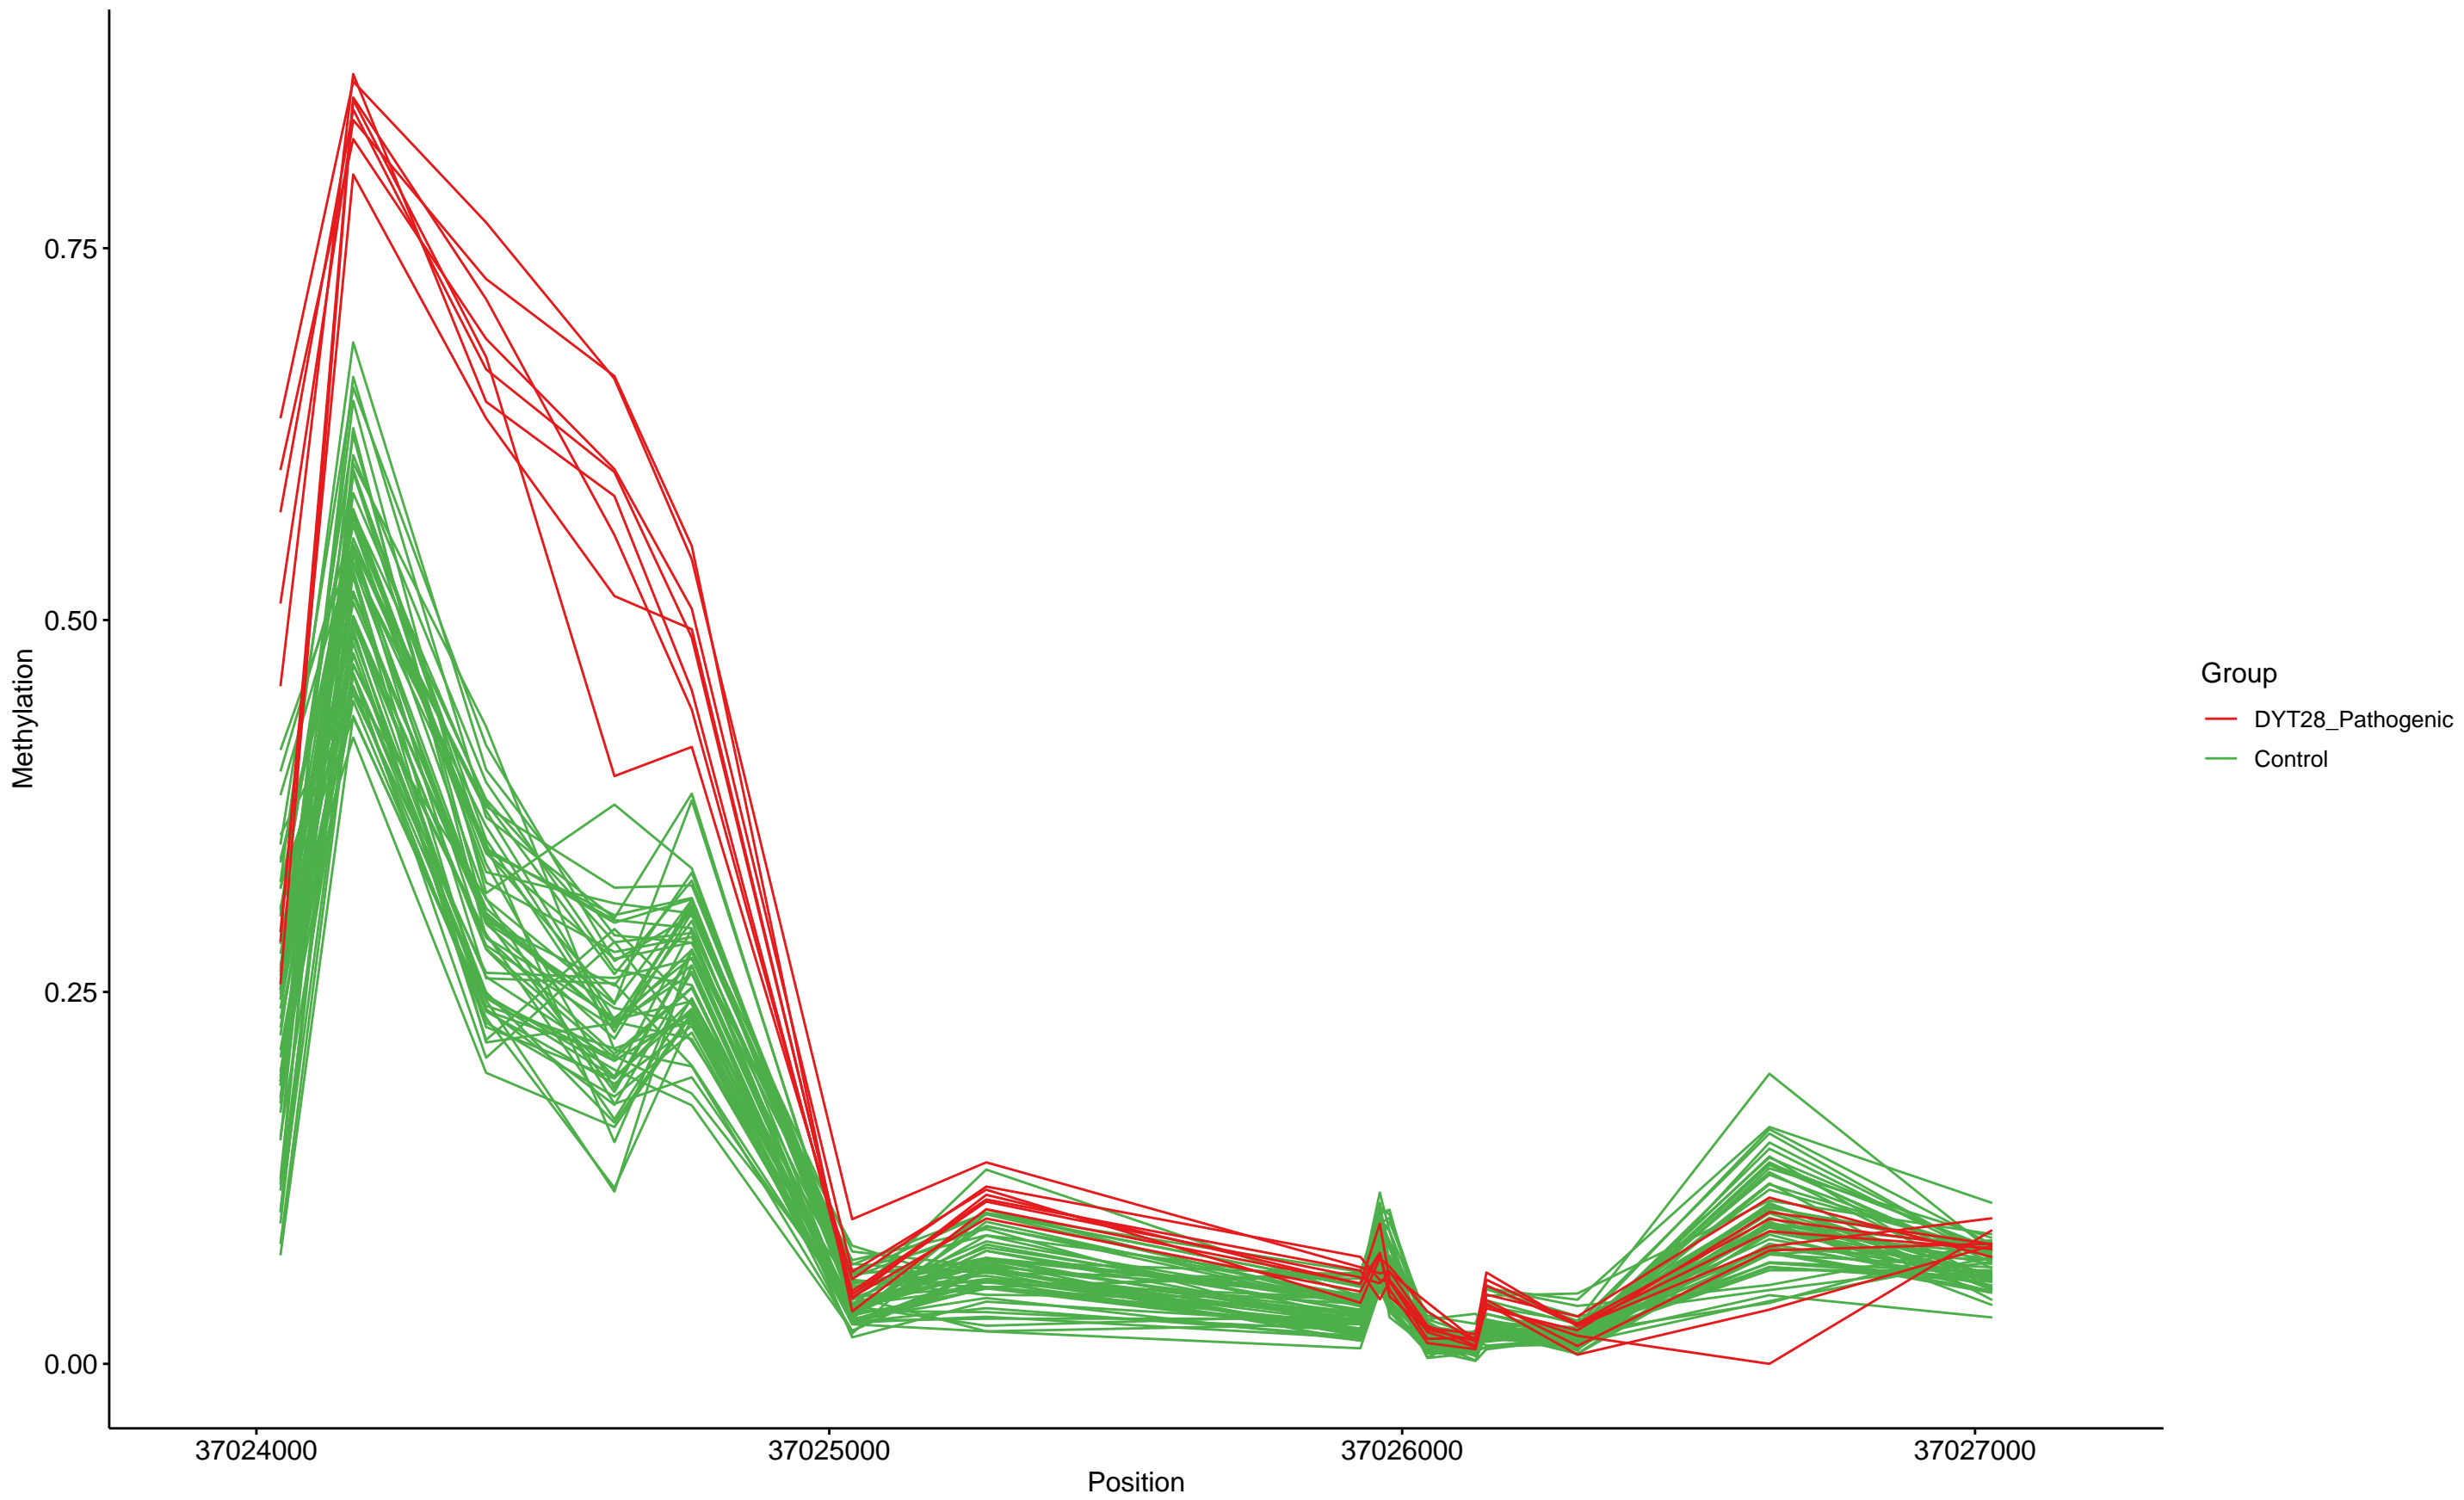

Region 18: chr3:87137900–87138700

Fisher: 1.288802736376e-63

Stouffer: 4.69725694705726e-67

Mean difference: 0.235216480114226

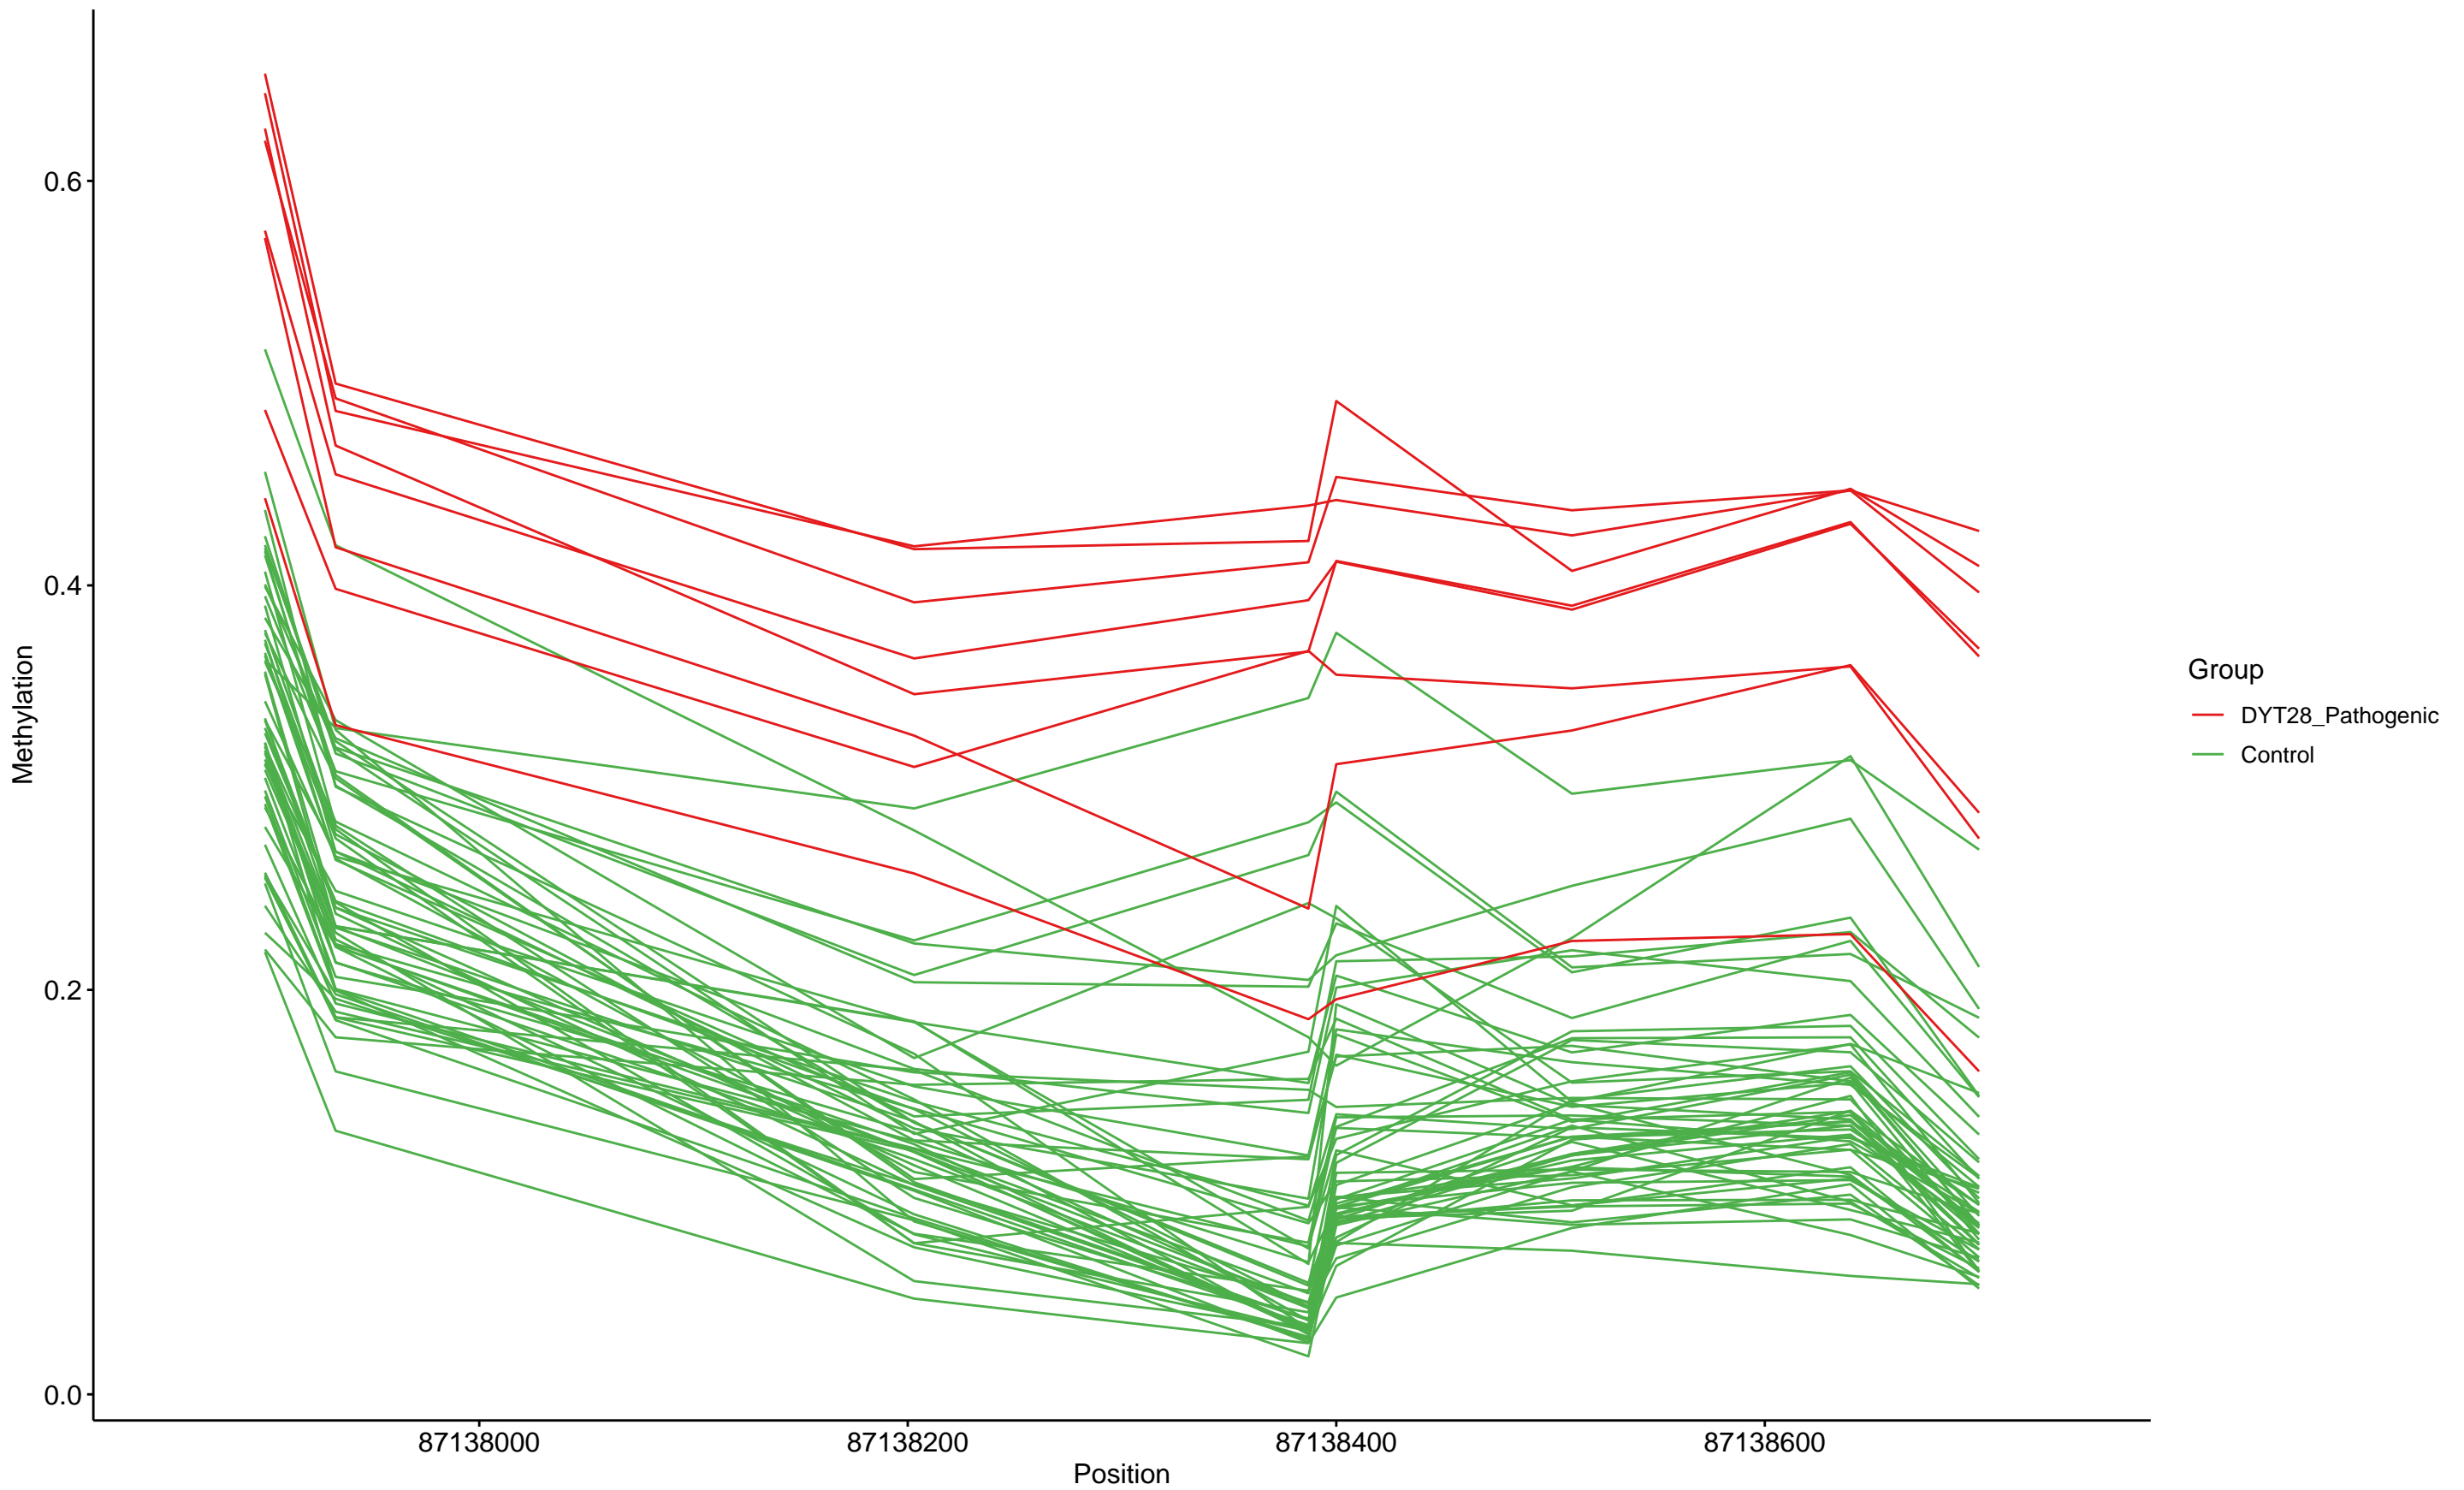

Region 19: chr1:36037583–36039866

Fisher: 1.88145585494641e-60

Stouffer: 4.66221044360347e-57

Mean difference: 0.106886431835773

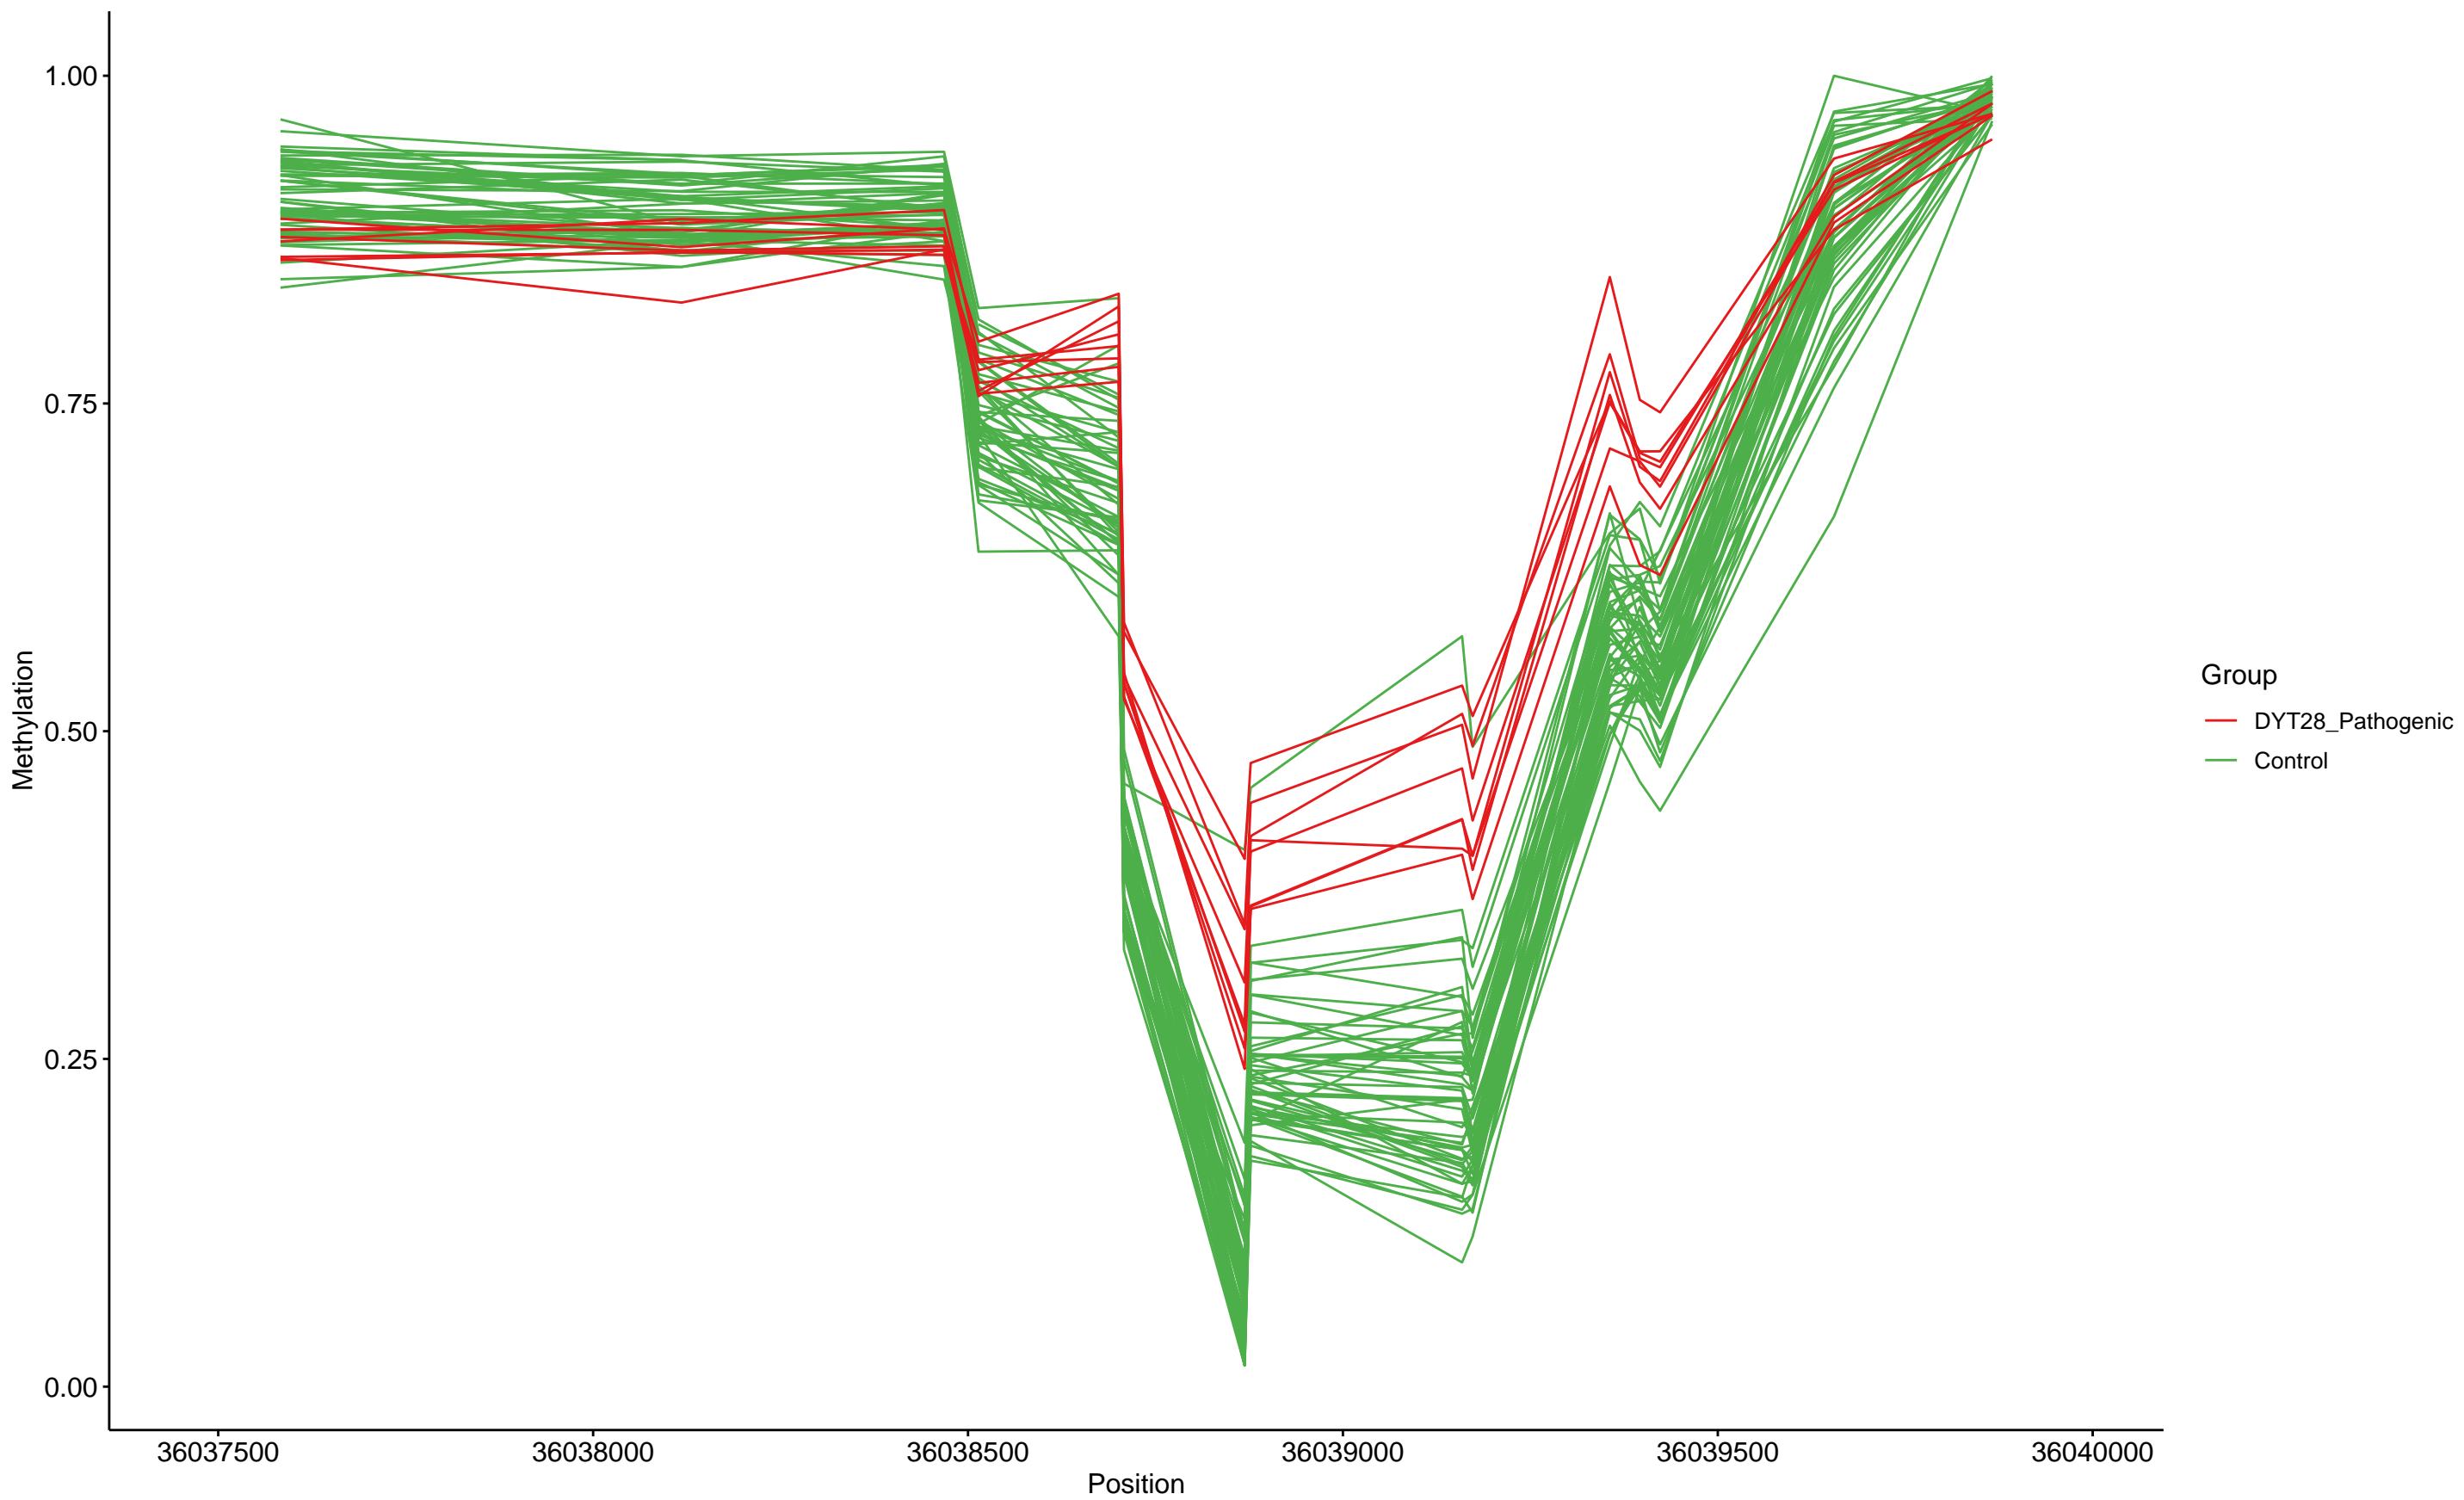

Region 20: chr12:12848516–12850082

Fisher: 2.89402569549831e-60

Stouffer: 2.66952810075269e-61

Mean difference: 0.12109234428128

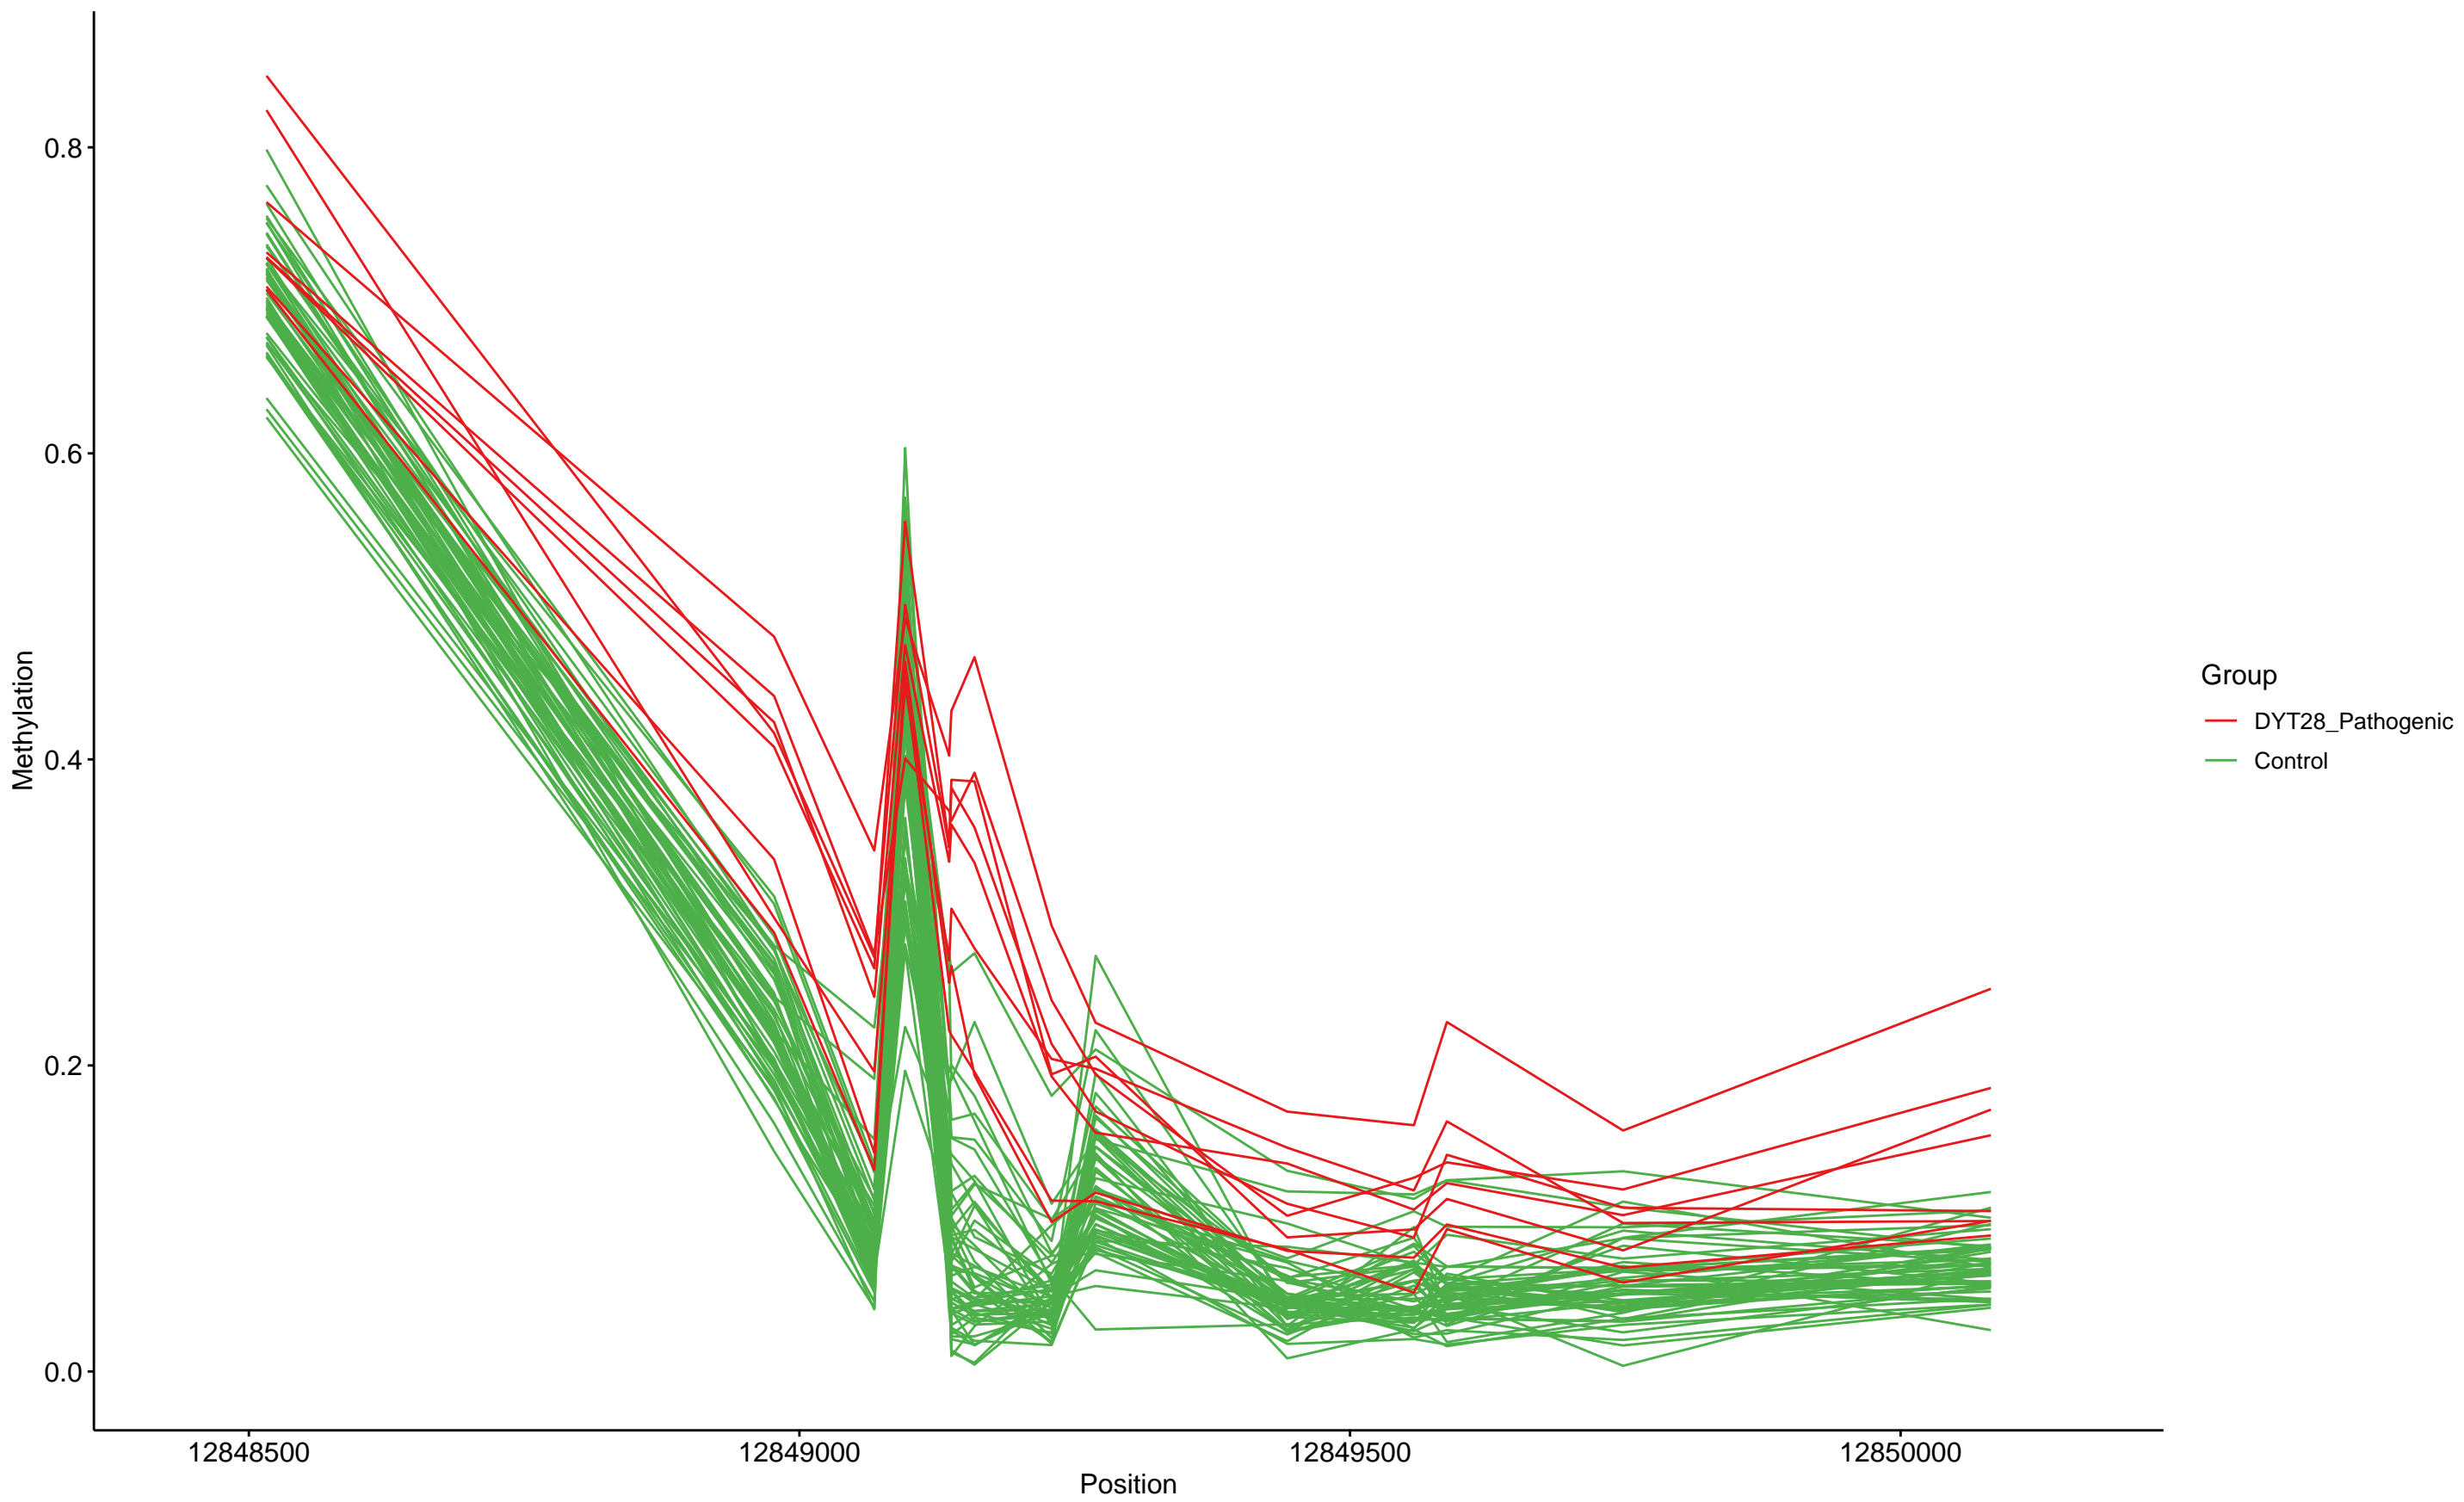



Region 21: chr3:113160071–113160821

Fisher: 3.223238808549e-59

Stouffer: 9.84807504646397e-54

Mean difference: 0.129845638868261

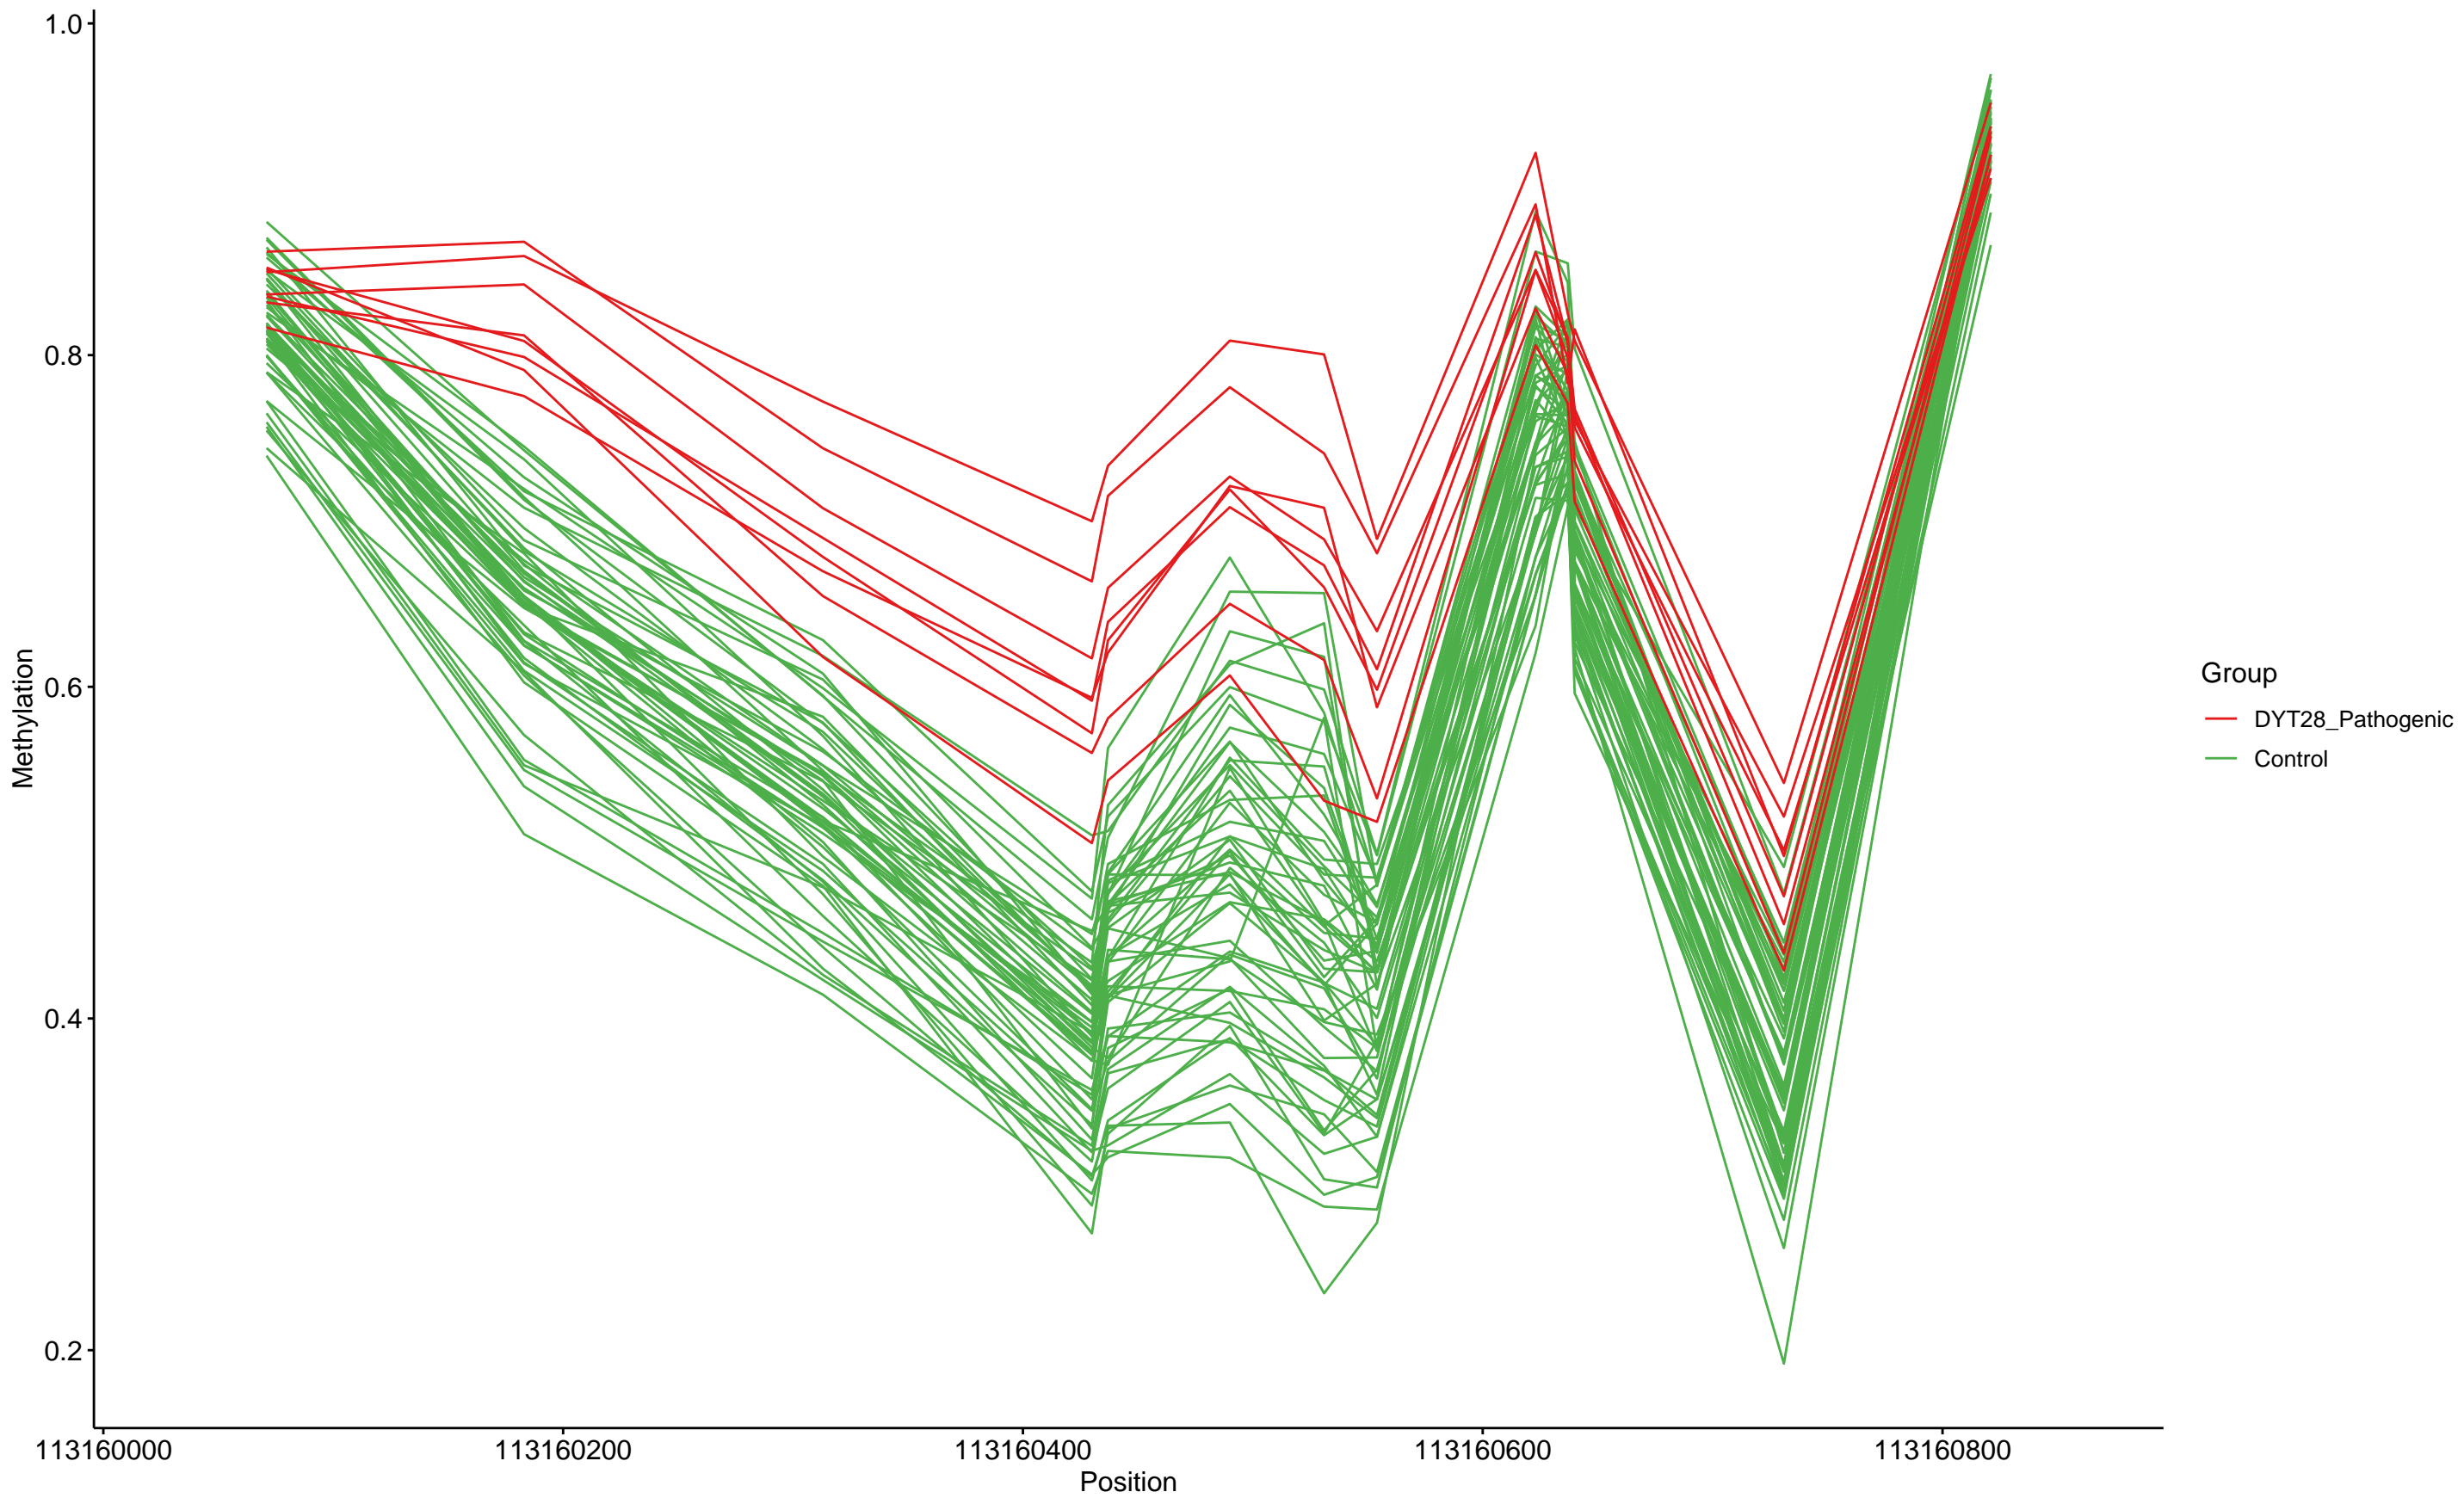

Region 22: chr5:137224284–137225509

Fisher: 5.50044349725489e-59

Stouffer: 1.46613235801281e-53

Mean difference: 0.148890785926568

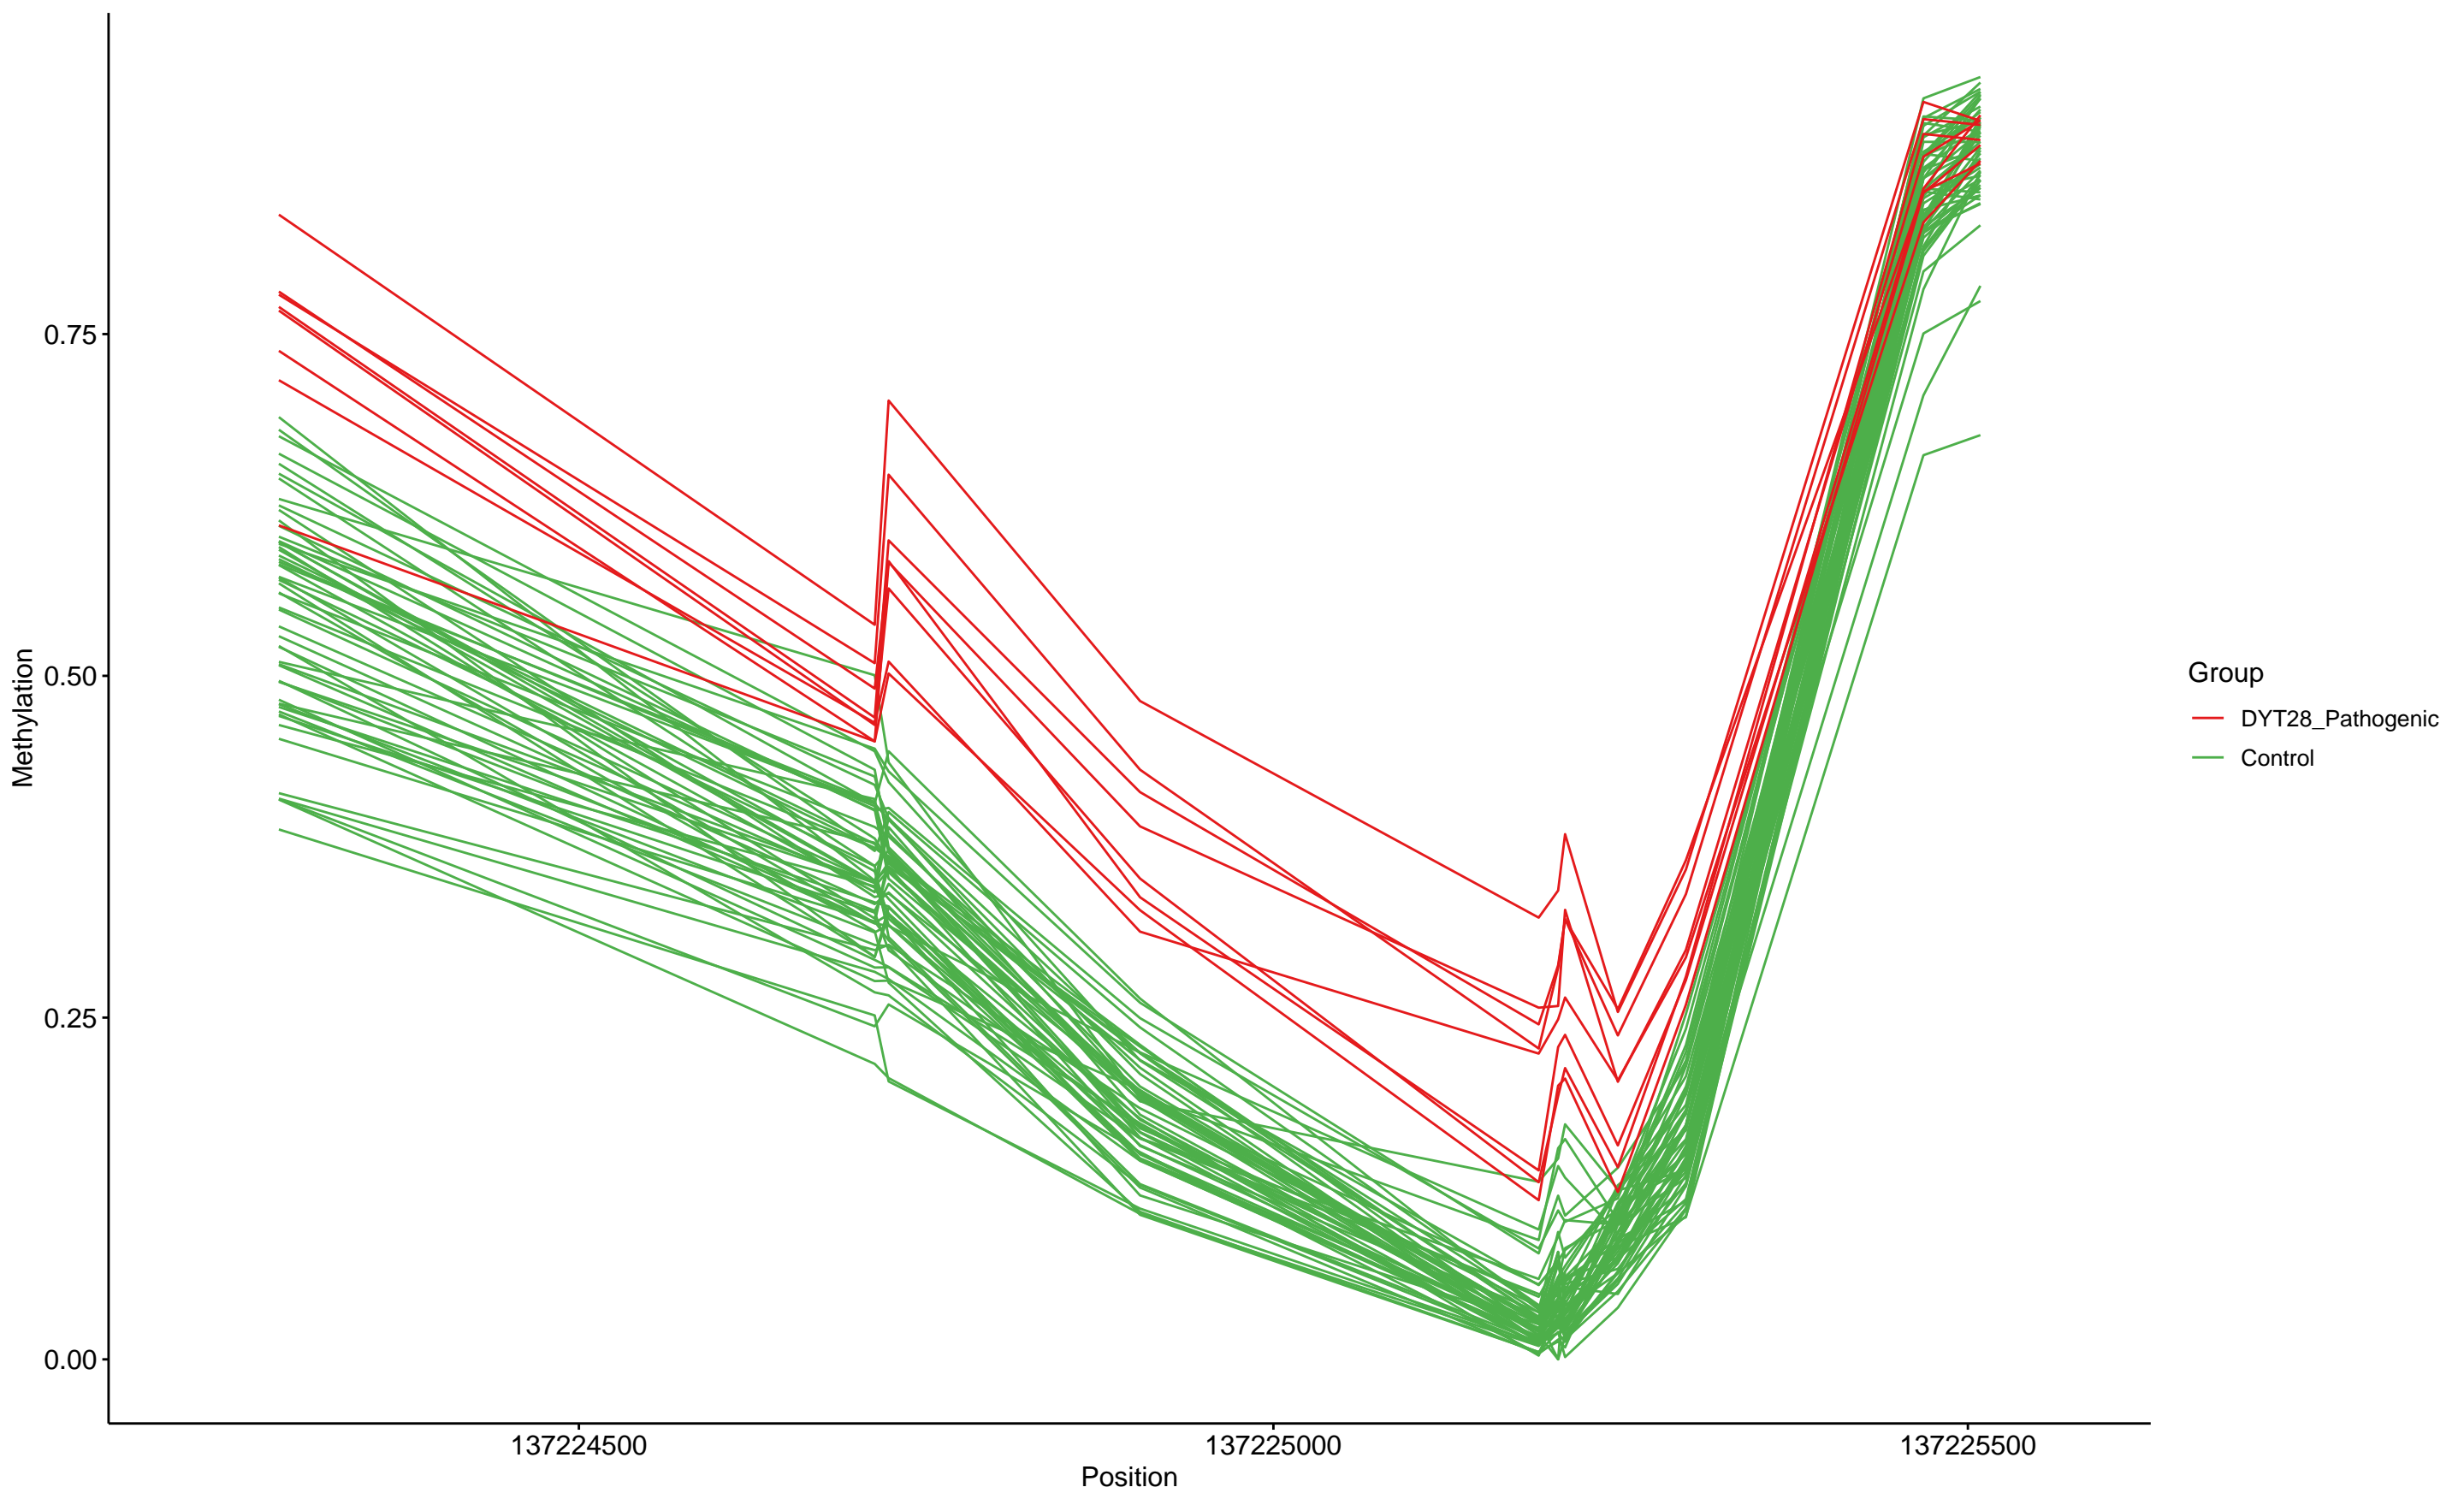

Region 23: chr3:145878177-145879710

Fisher: 8.63493225587609e-59

Stouffer: 3.07129595042155e-49

Mean difference: 0.104773988355474

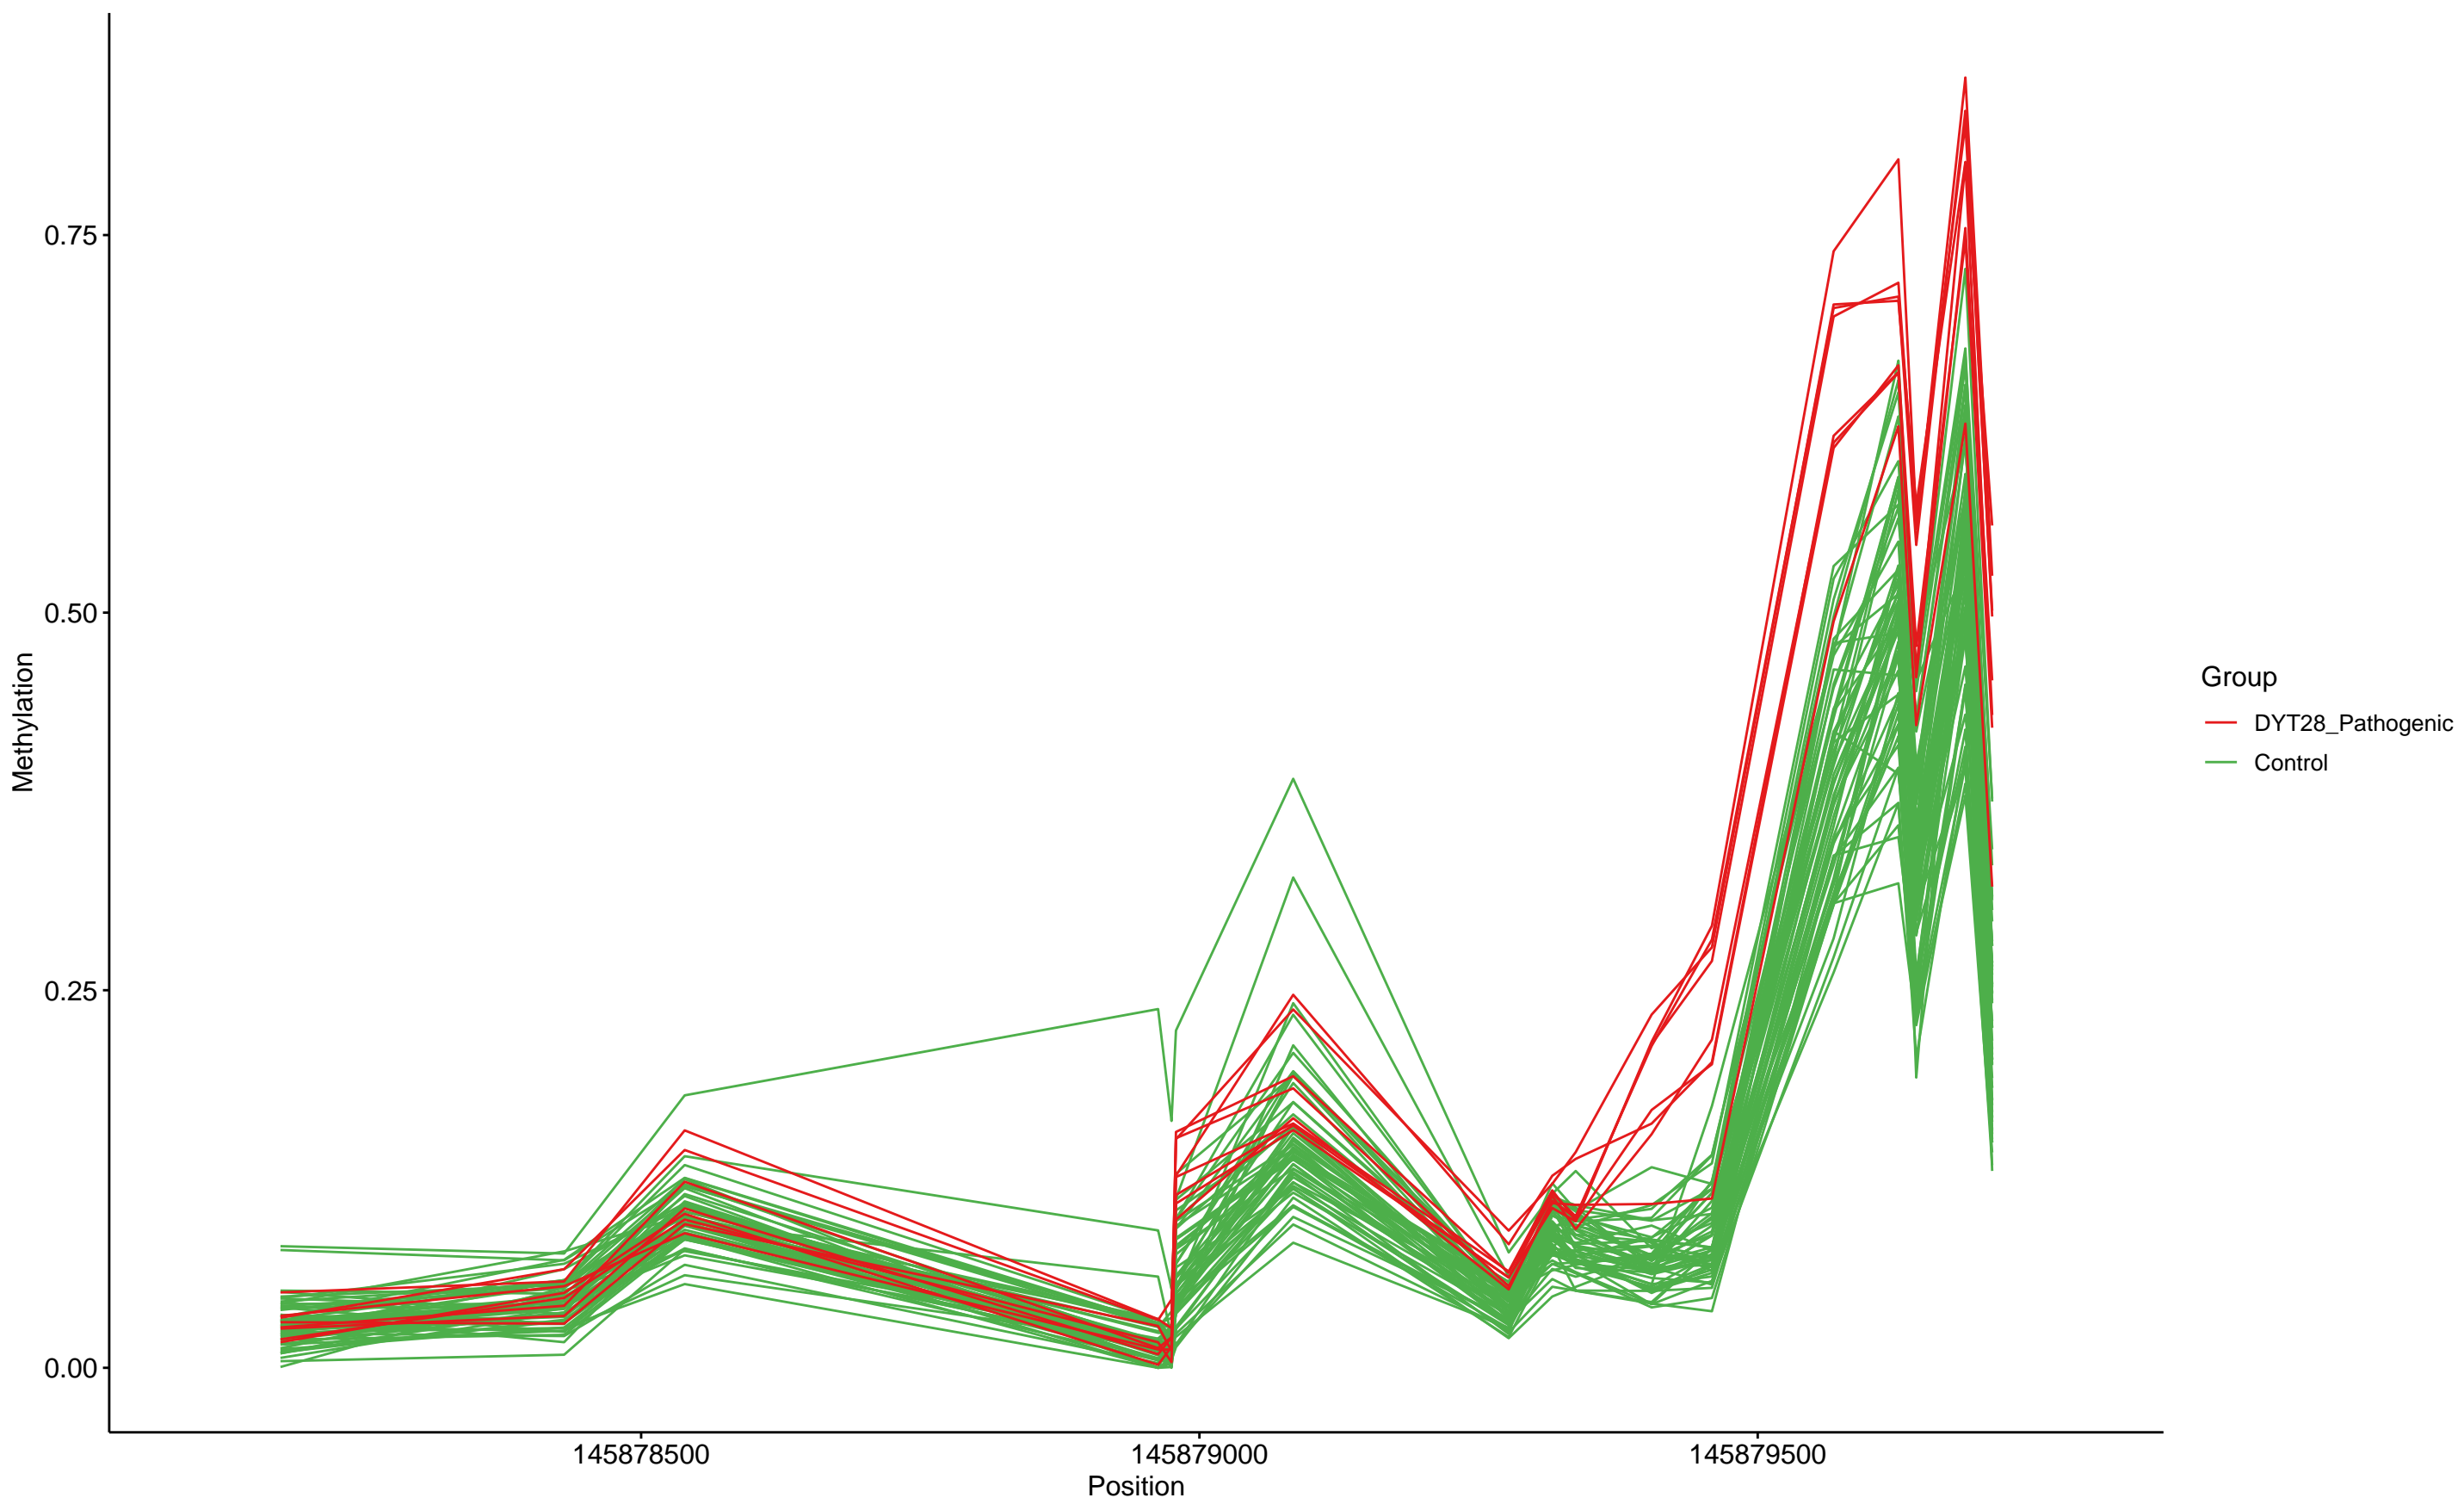

Region 24: chr4:103940711-103941681

Fisher: 4.17732623916377e-58

Stouffer: 4.3456694557931e-60

Mean difference: 0.165241547902981

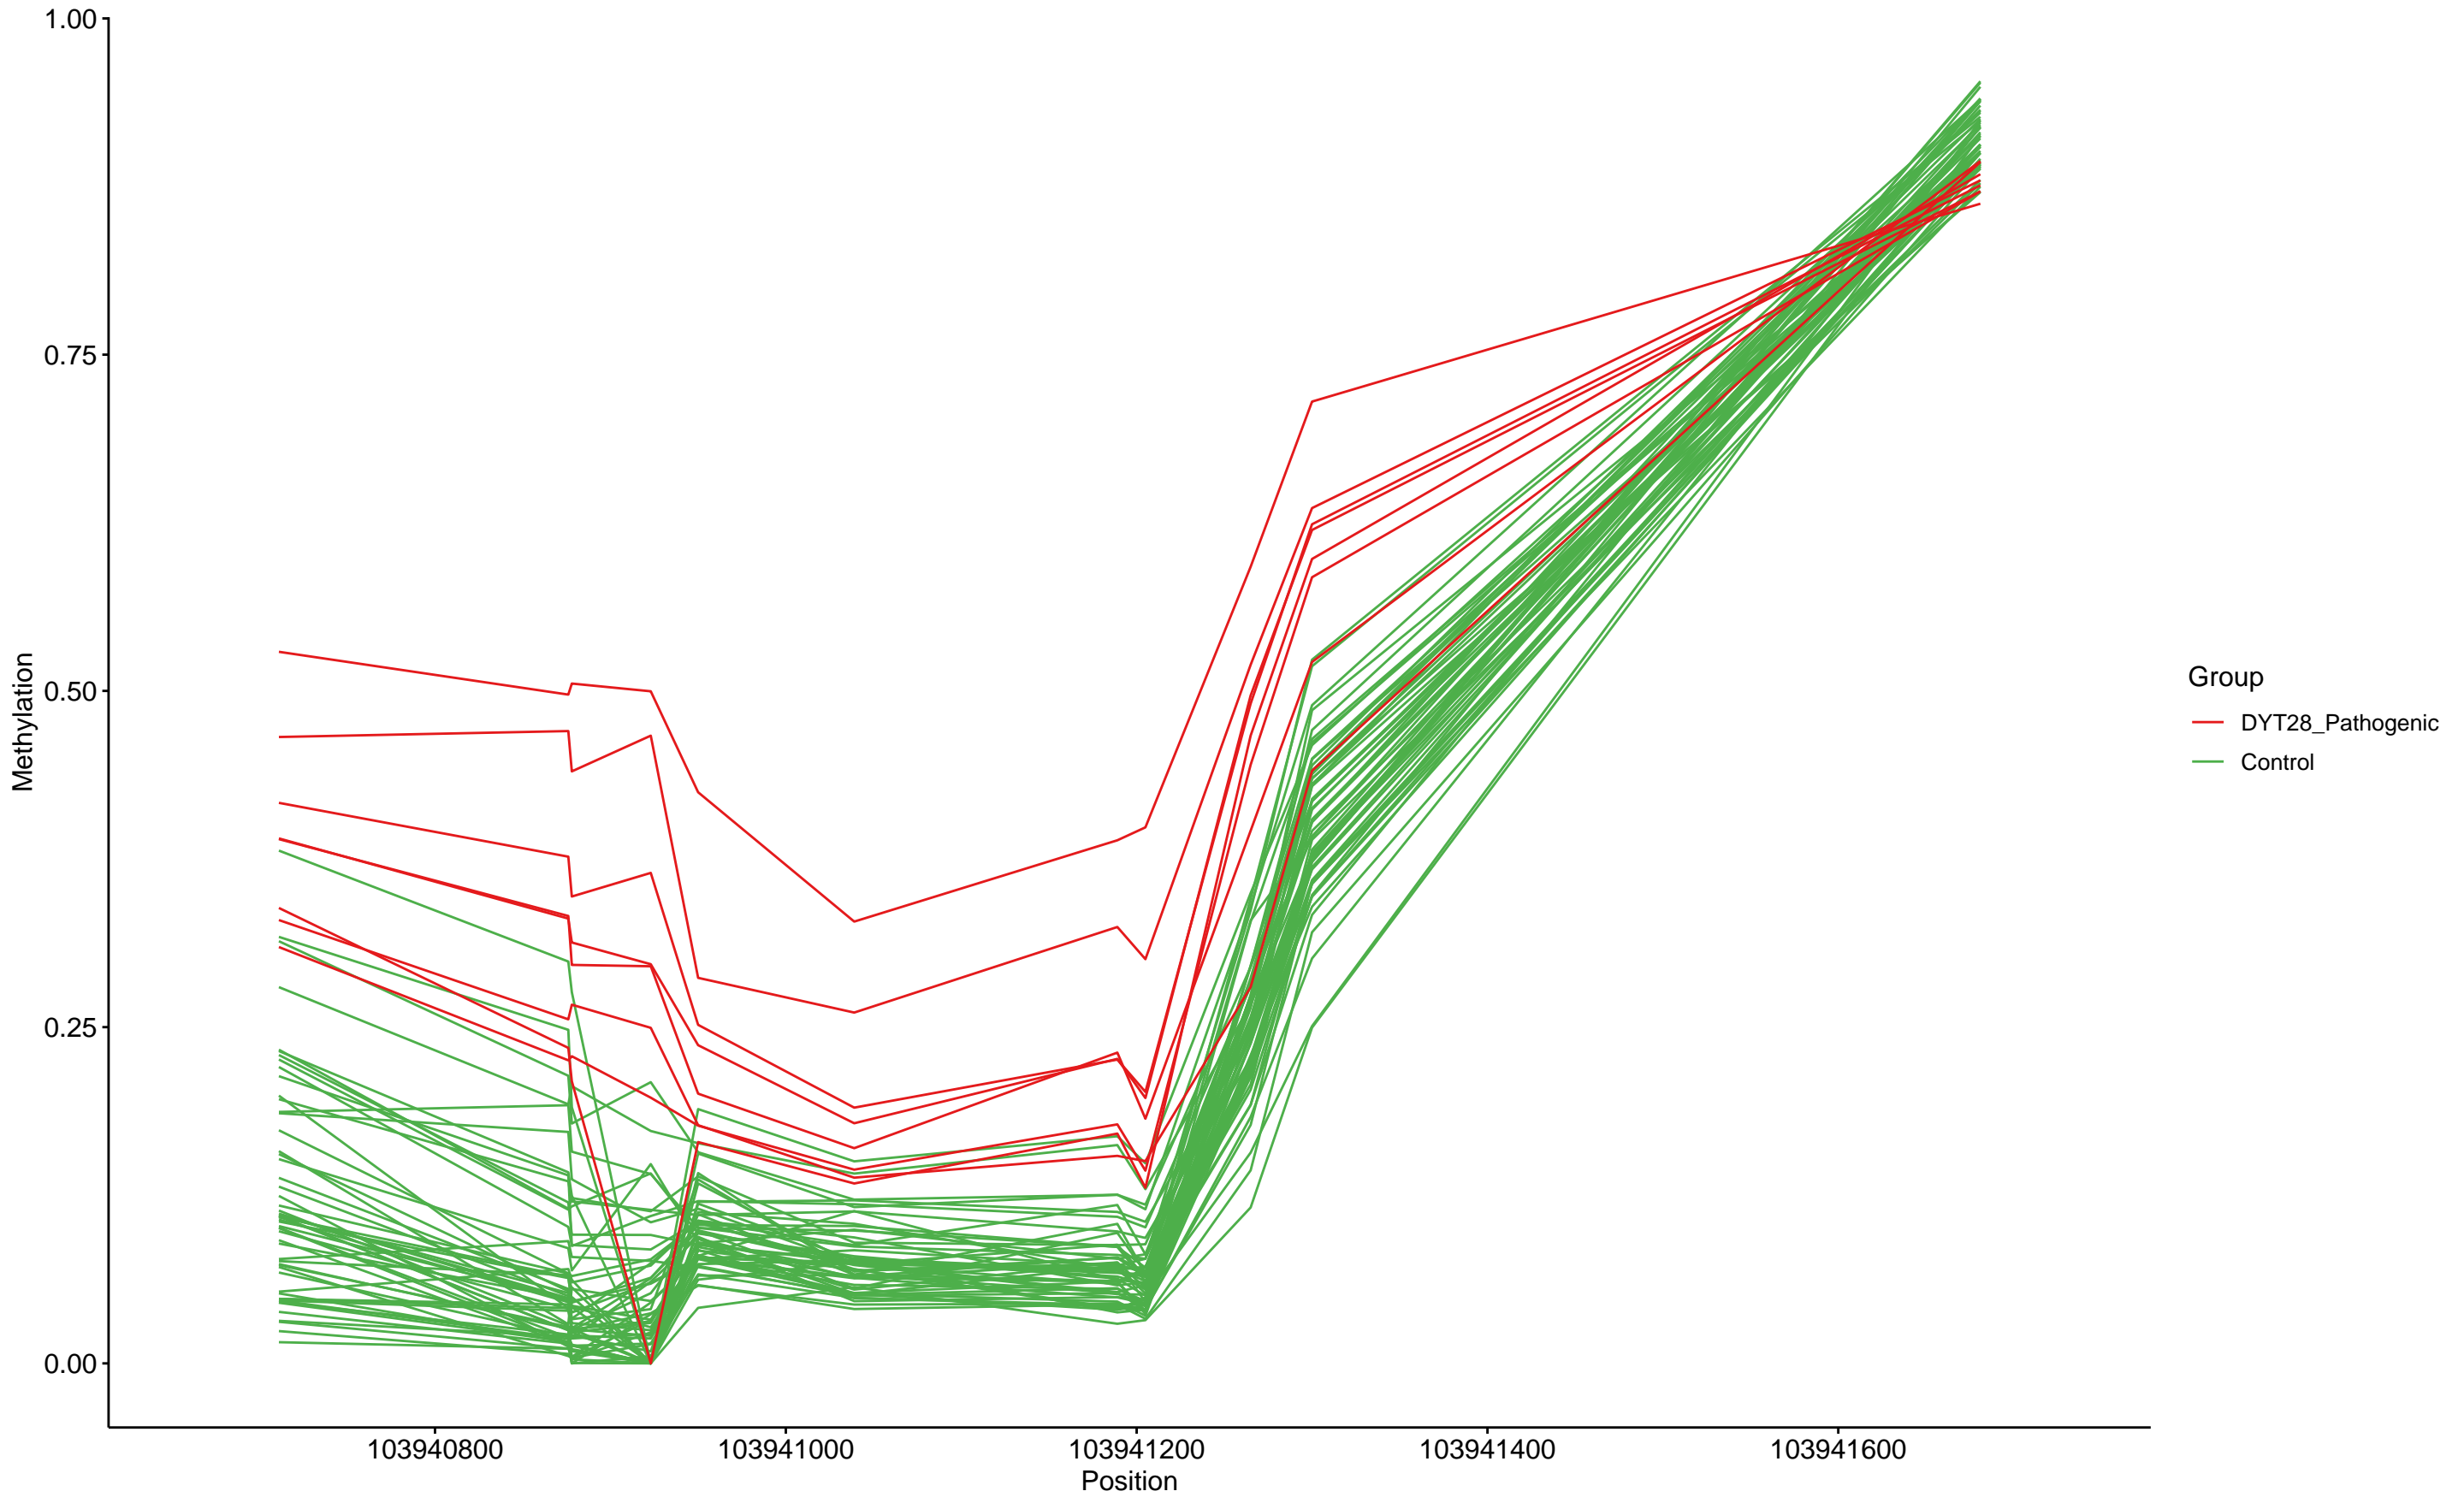



Region 25: chr2:187713554–187714279

Fisher: 2.63119976667088e-57

Stouffer: 4.86312326370894e-60

Mean difference: 0.110184061054407

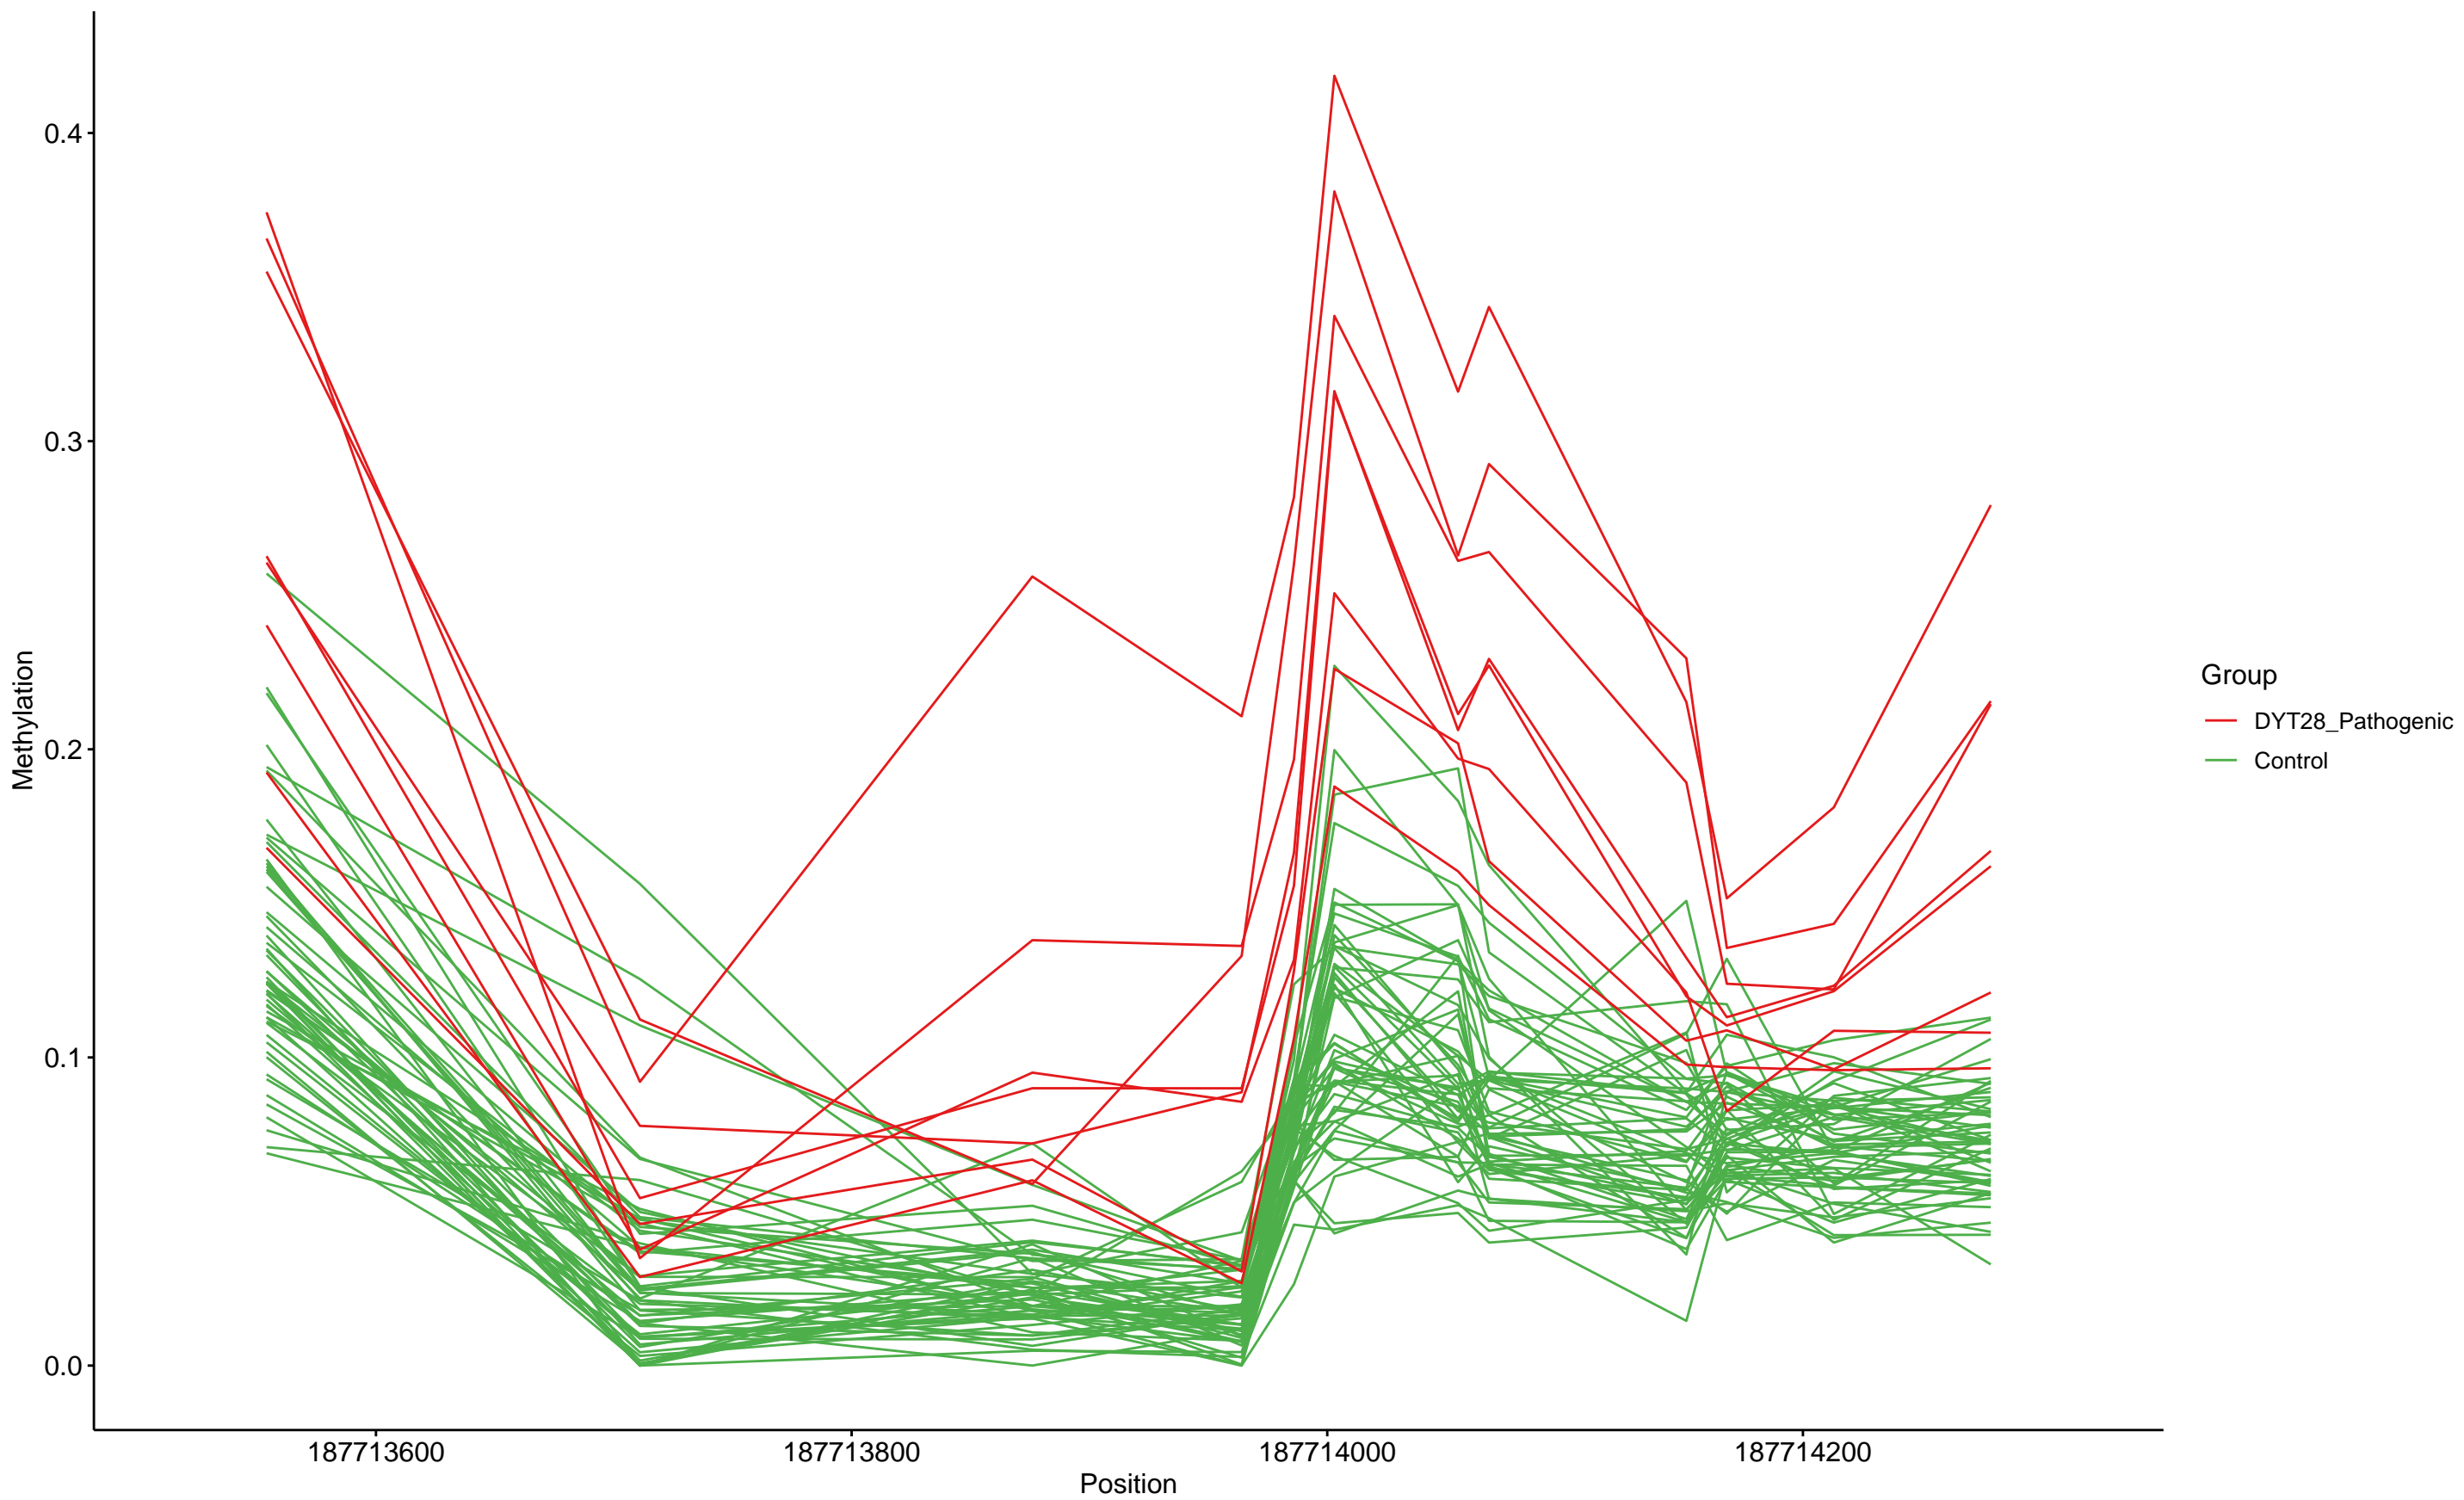

Region 26: chr12:104696685-104697983

Fisher:  $8.77281898692776e-57$

Stouffer:  $6.88677051605023e-60$

Mean difference: 0.138404089765035

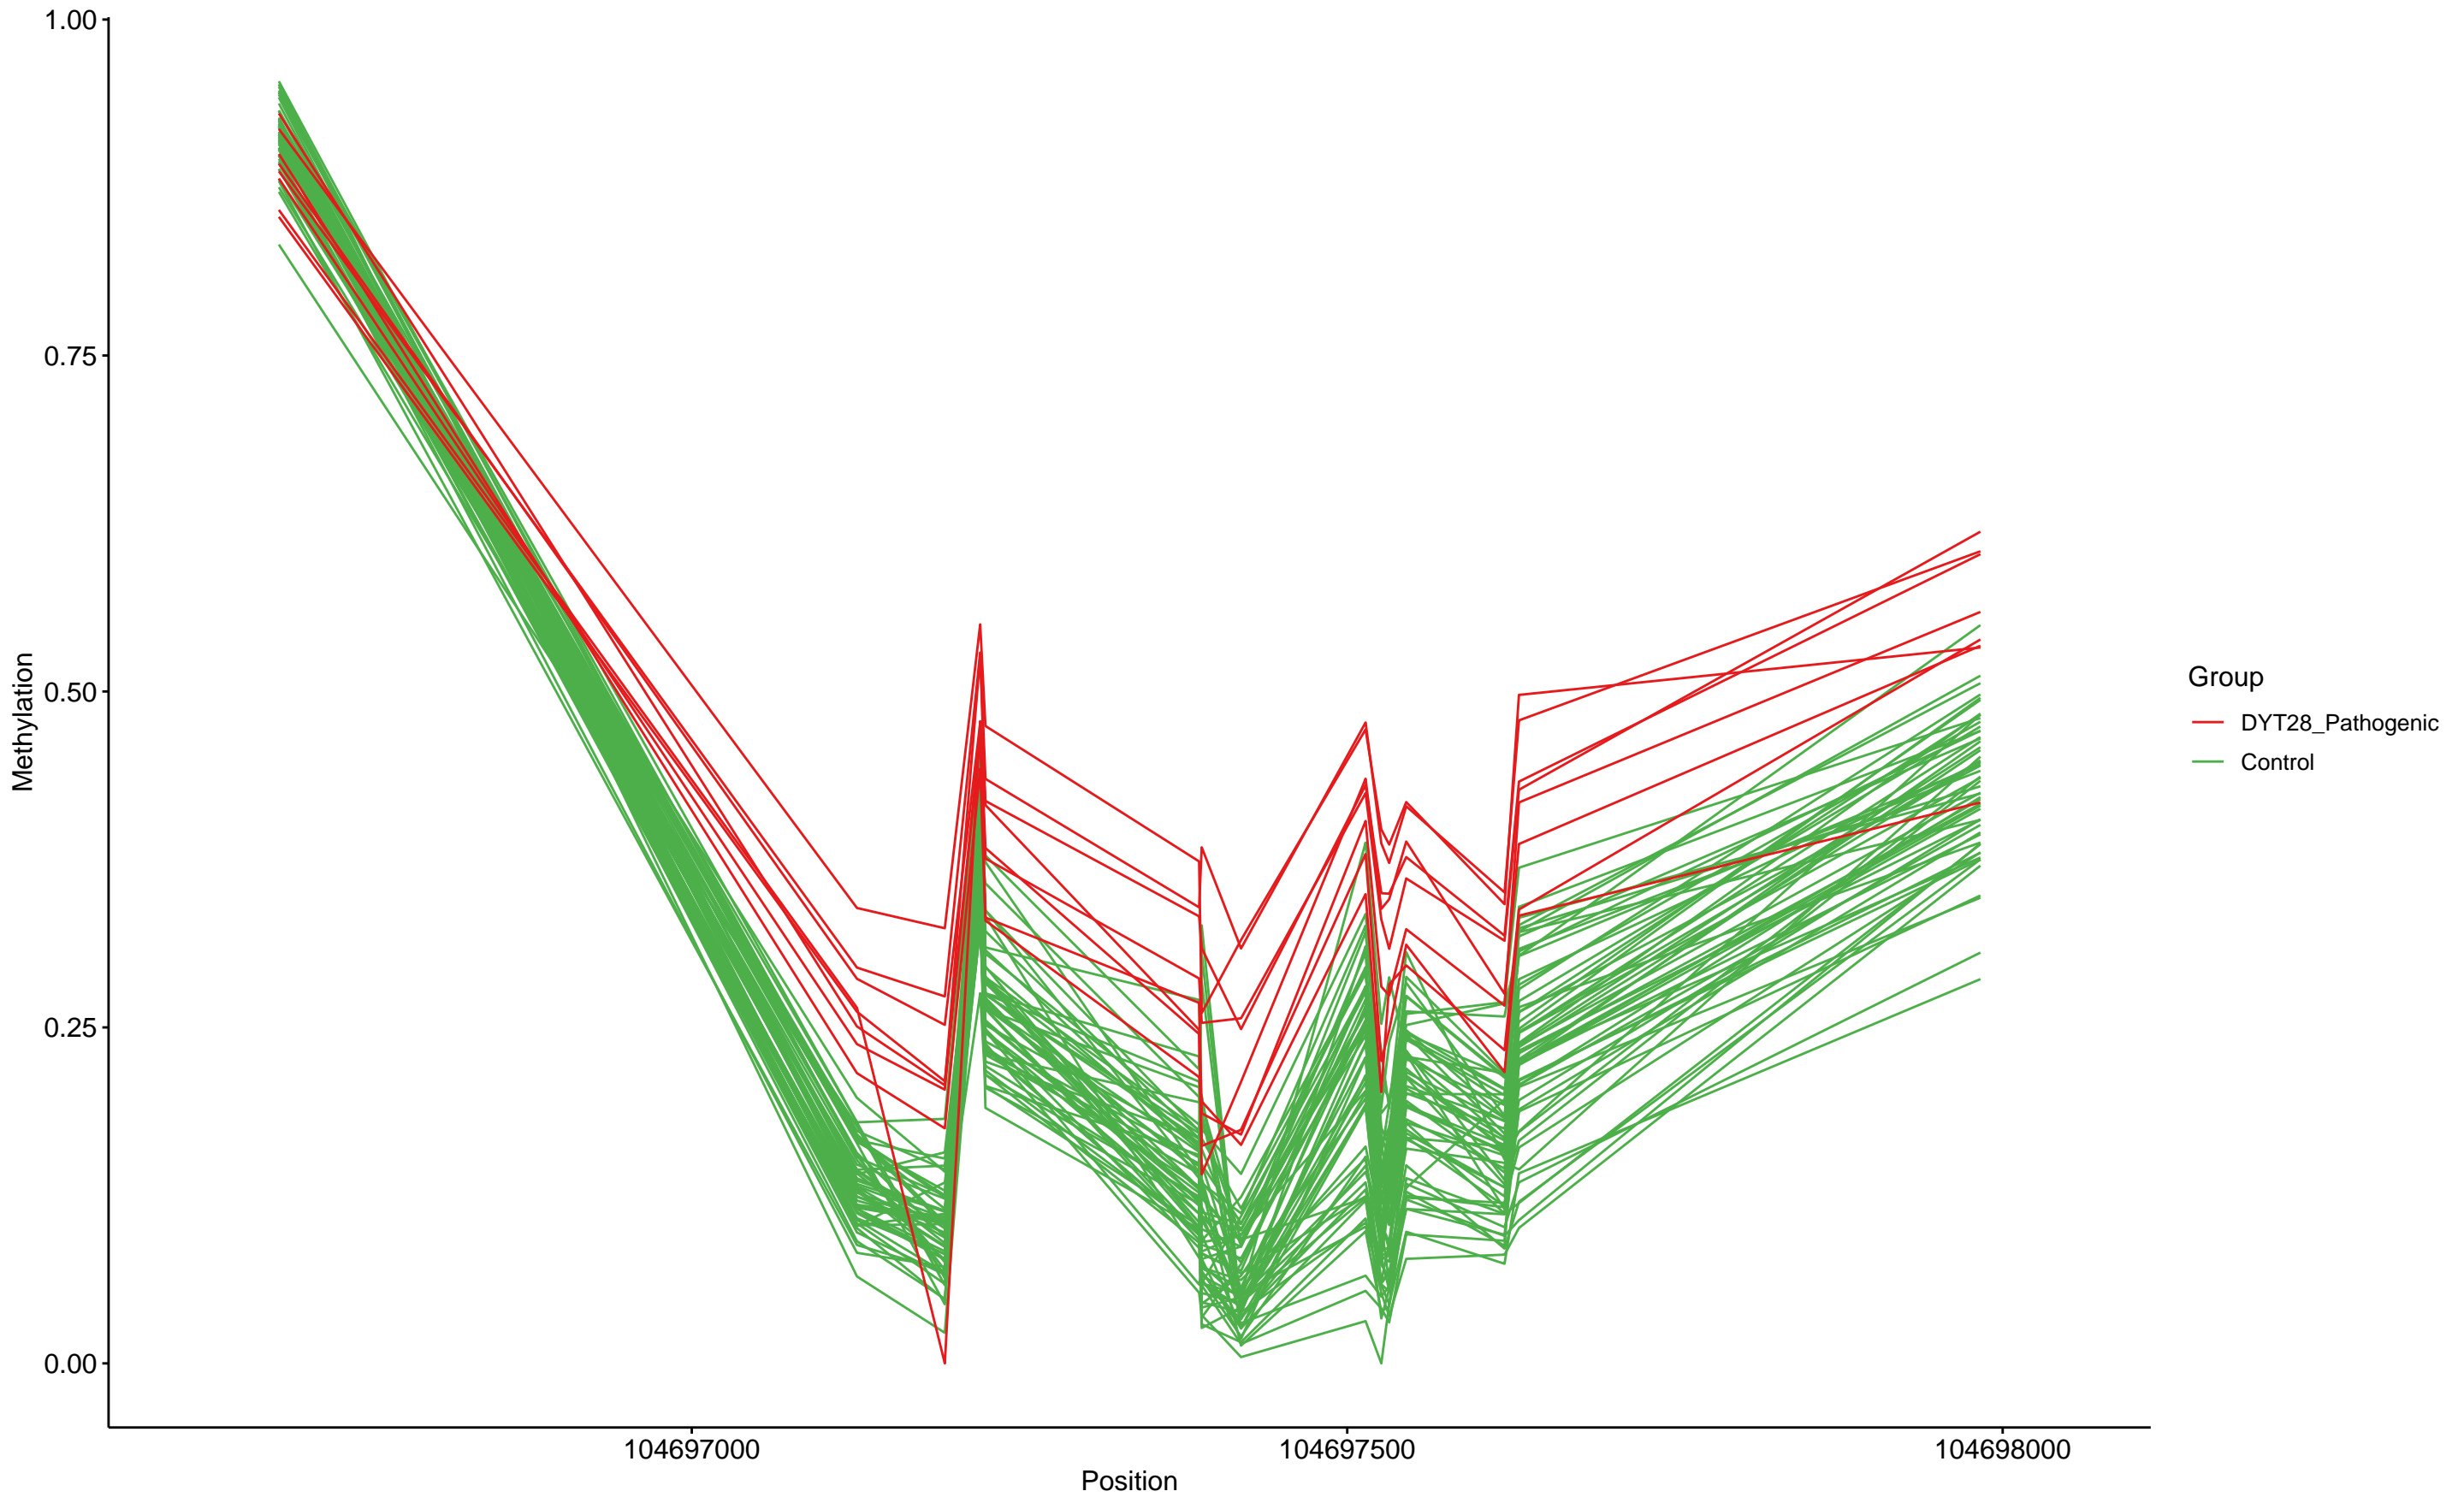

Region 27: chr1:207817838–207818818

Fisher: 6.24980335346889e-56

Stouffer: 2.60024868733515e-58

Mean difference: 0.169245249617559

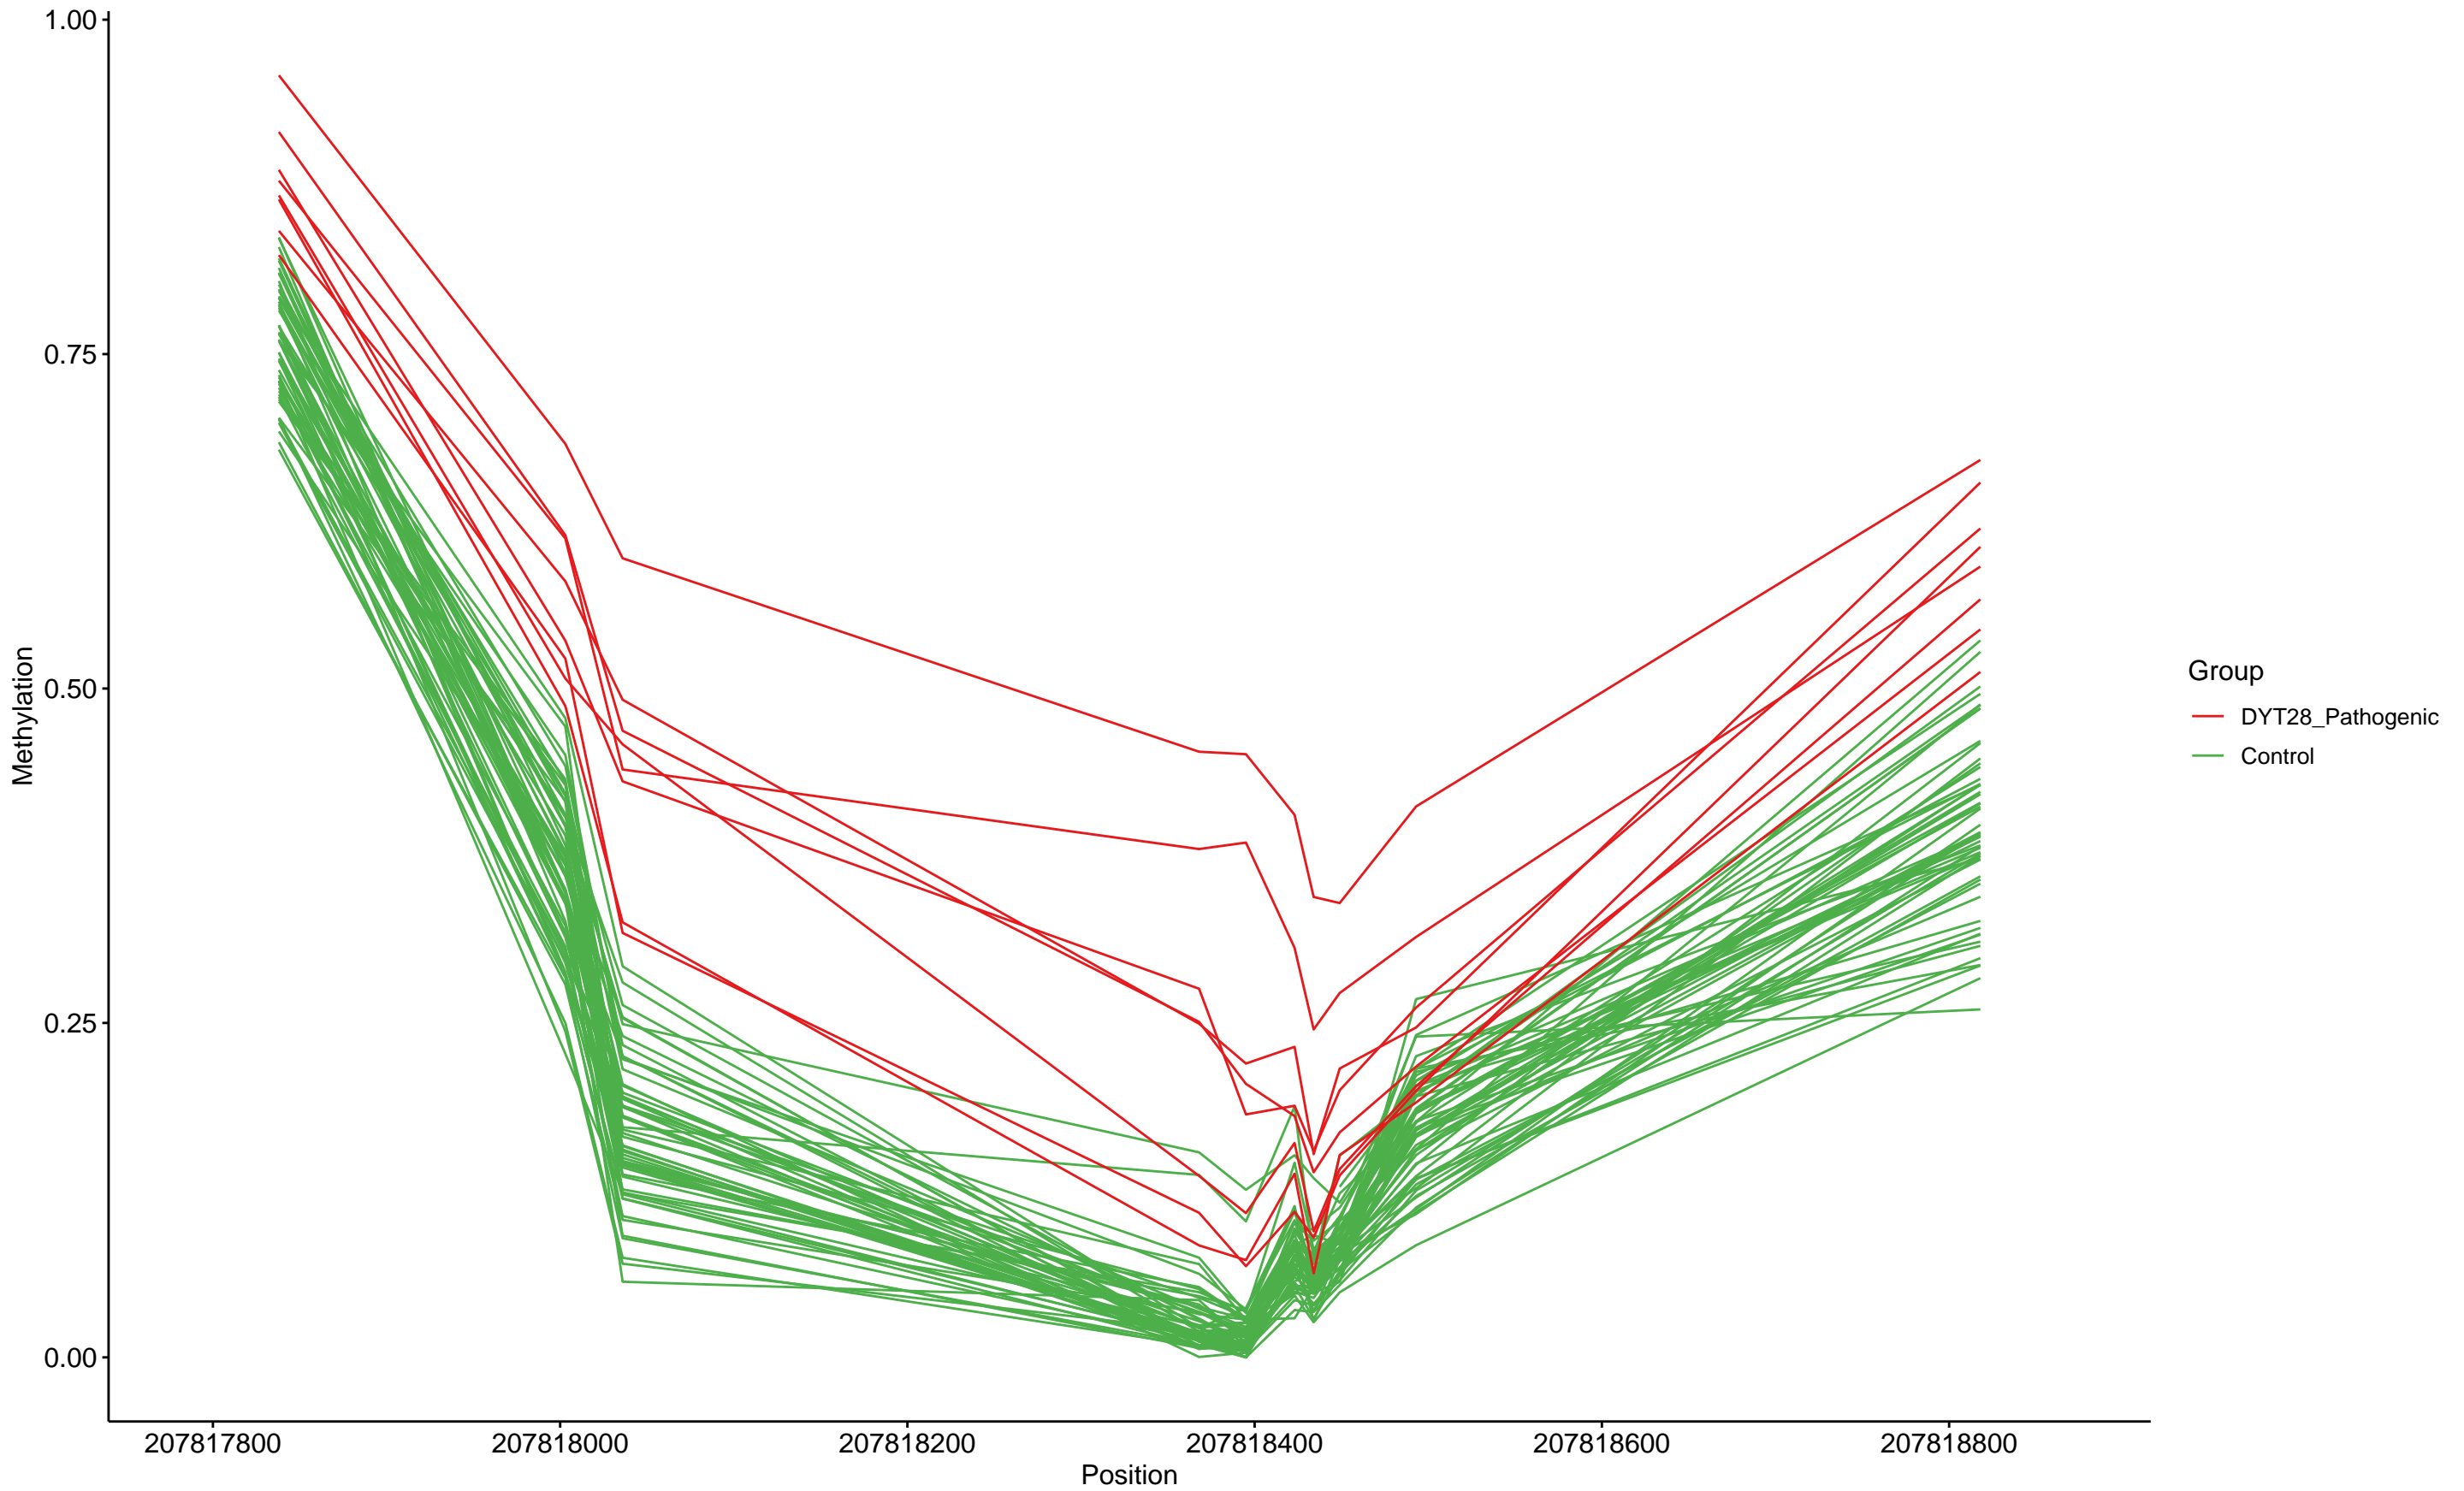

Region 28: chr14:96890120-96891077

Fisher: 3.70859934958739e-55

Stouffer: 3.4035349272261e-44

Mean difference: 0.188359990268931

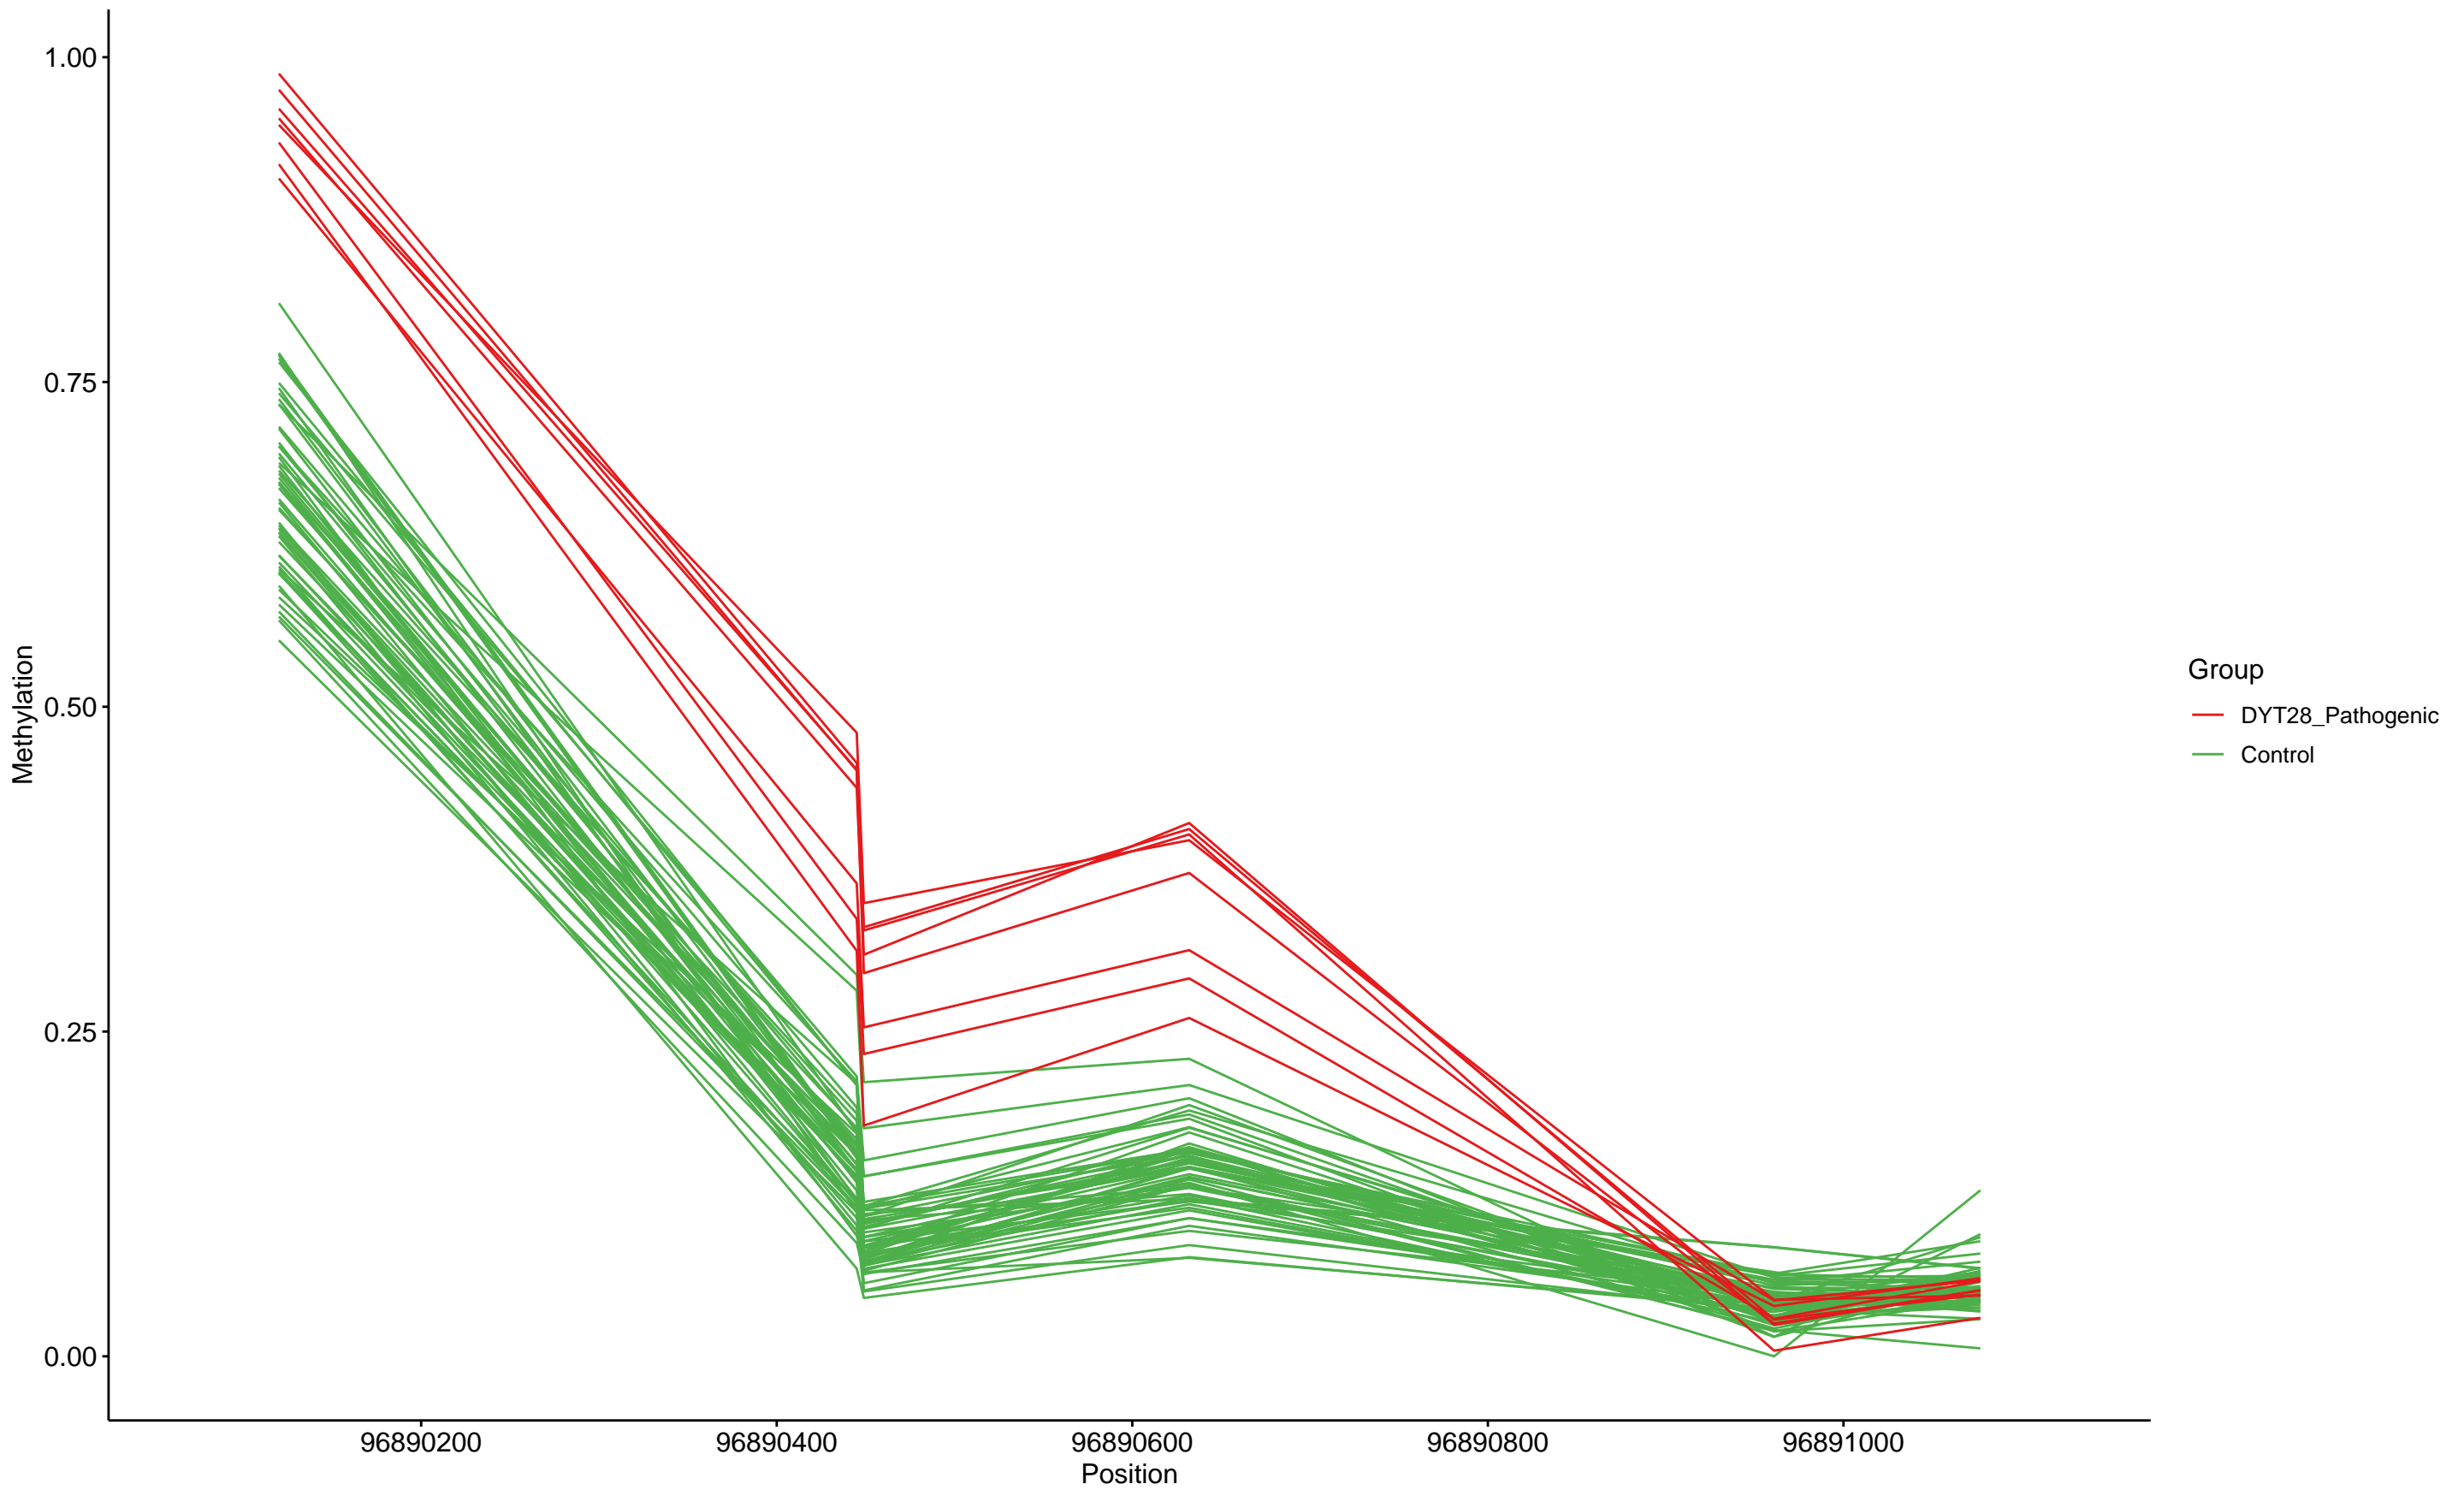



Region 29: chr2:165811765–165812478

Fisher: 1.39117011915112e-54

Stouffer: 3.10303253993836e-51

Mean difference: 0.101044444159004

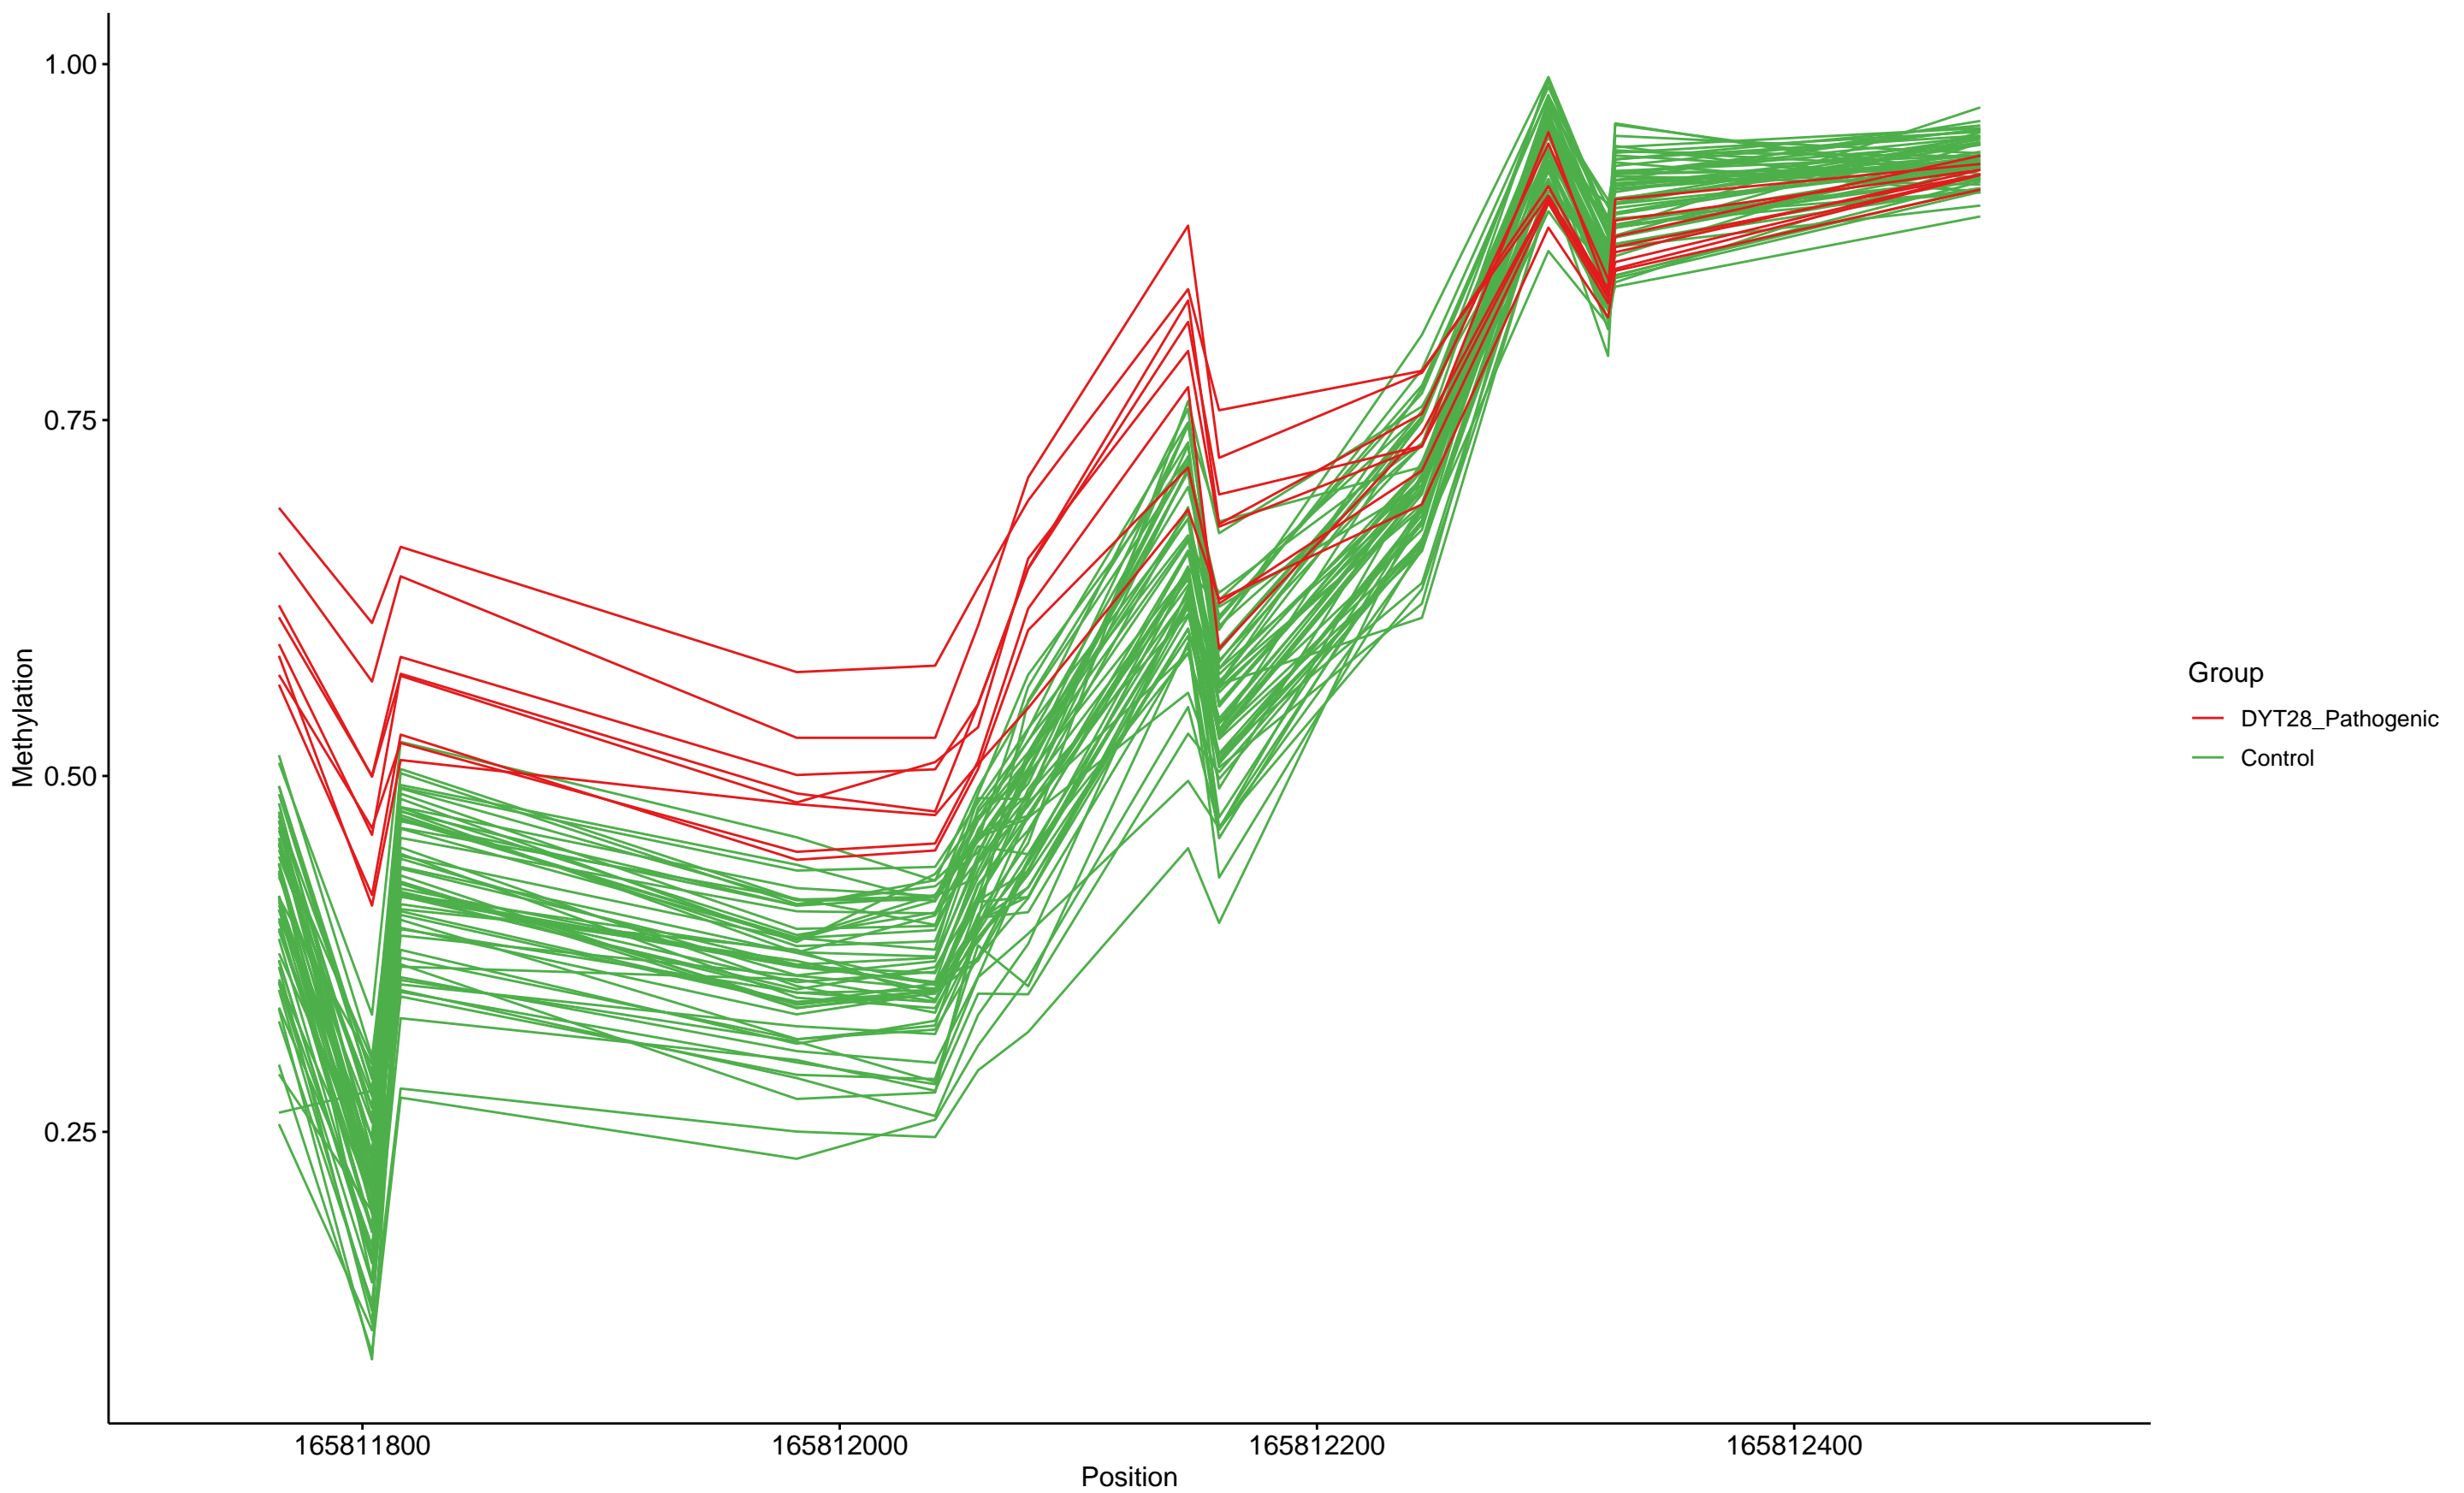

Region 30: chr6:28921103–28922226

Fisher: 2.42056843148116e-54

Stouffer: 2.07994046013991e-49

Mean difference: 0.100009828576441

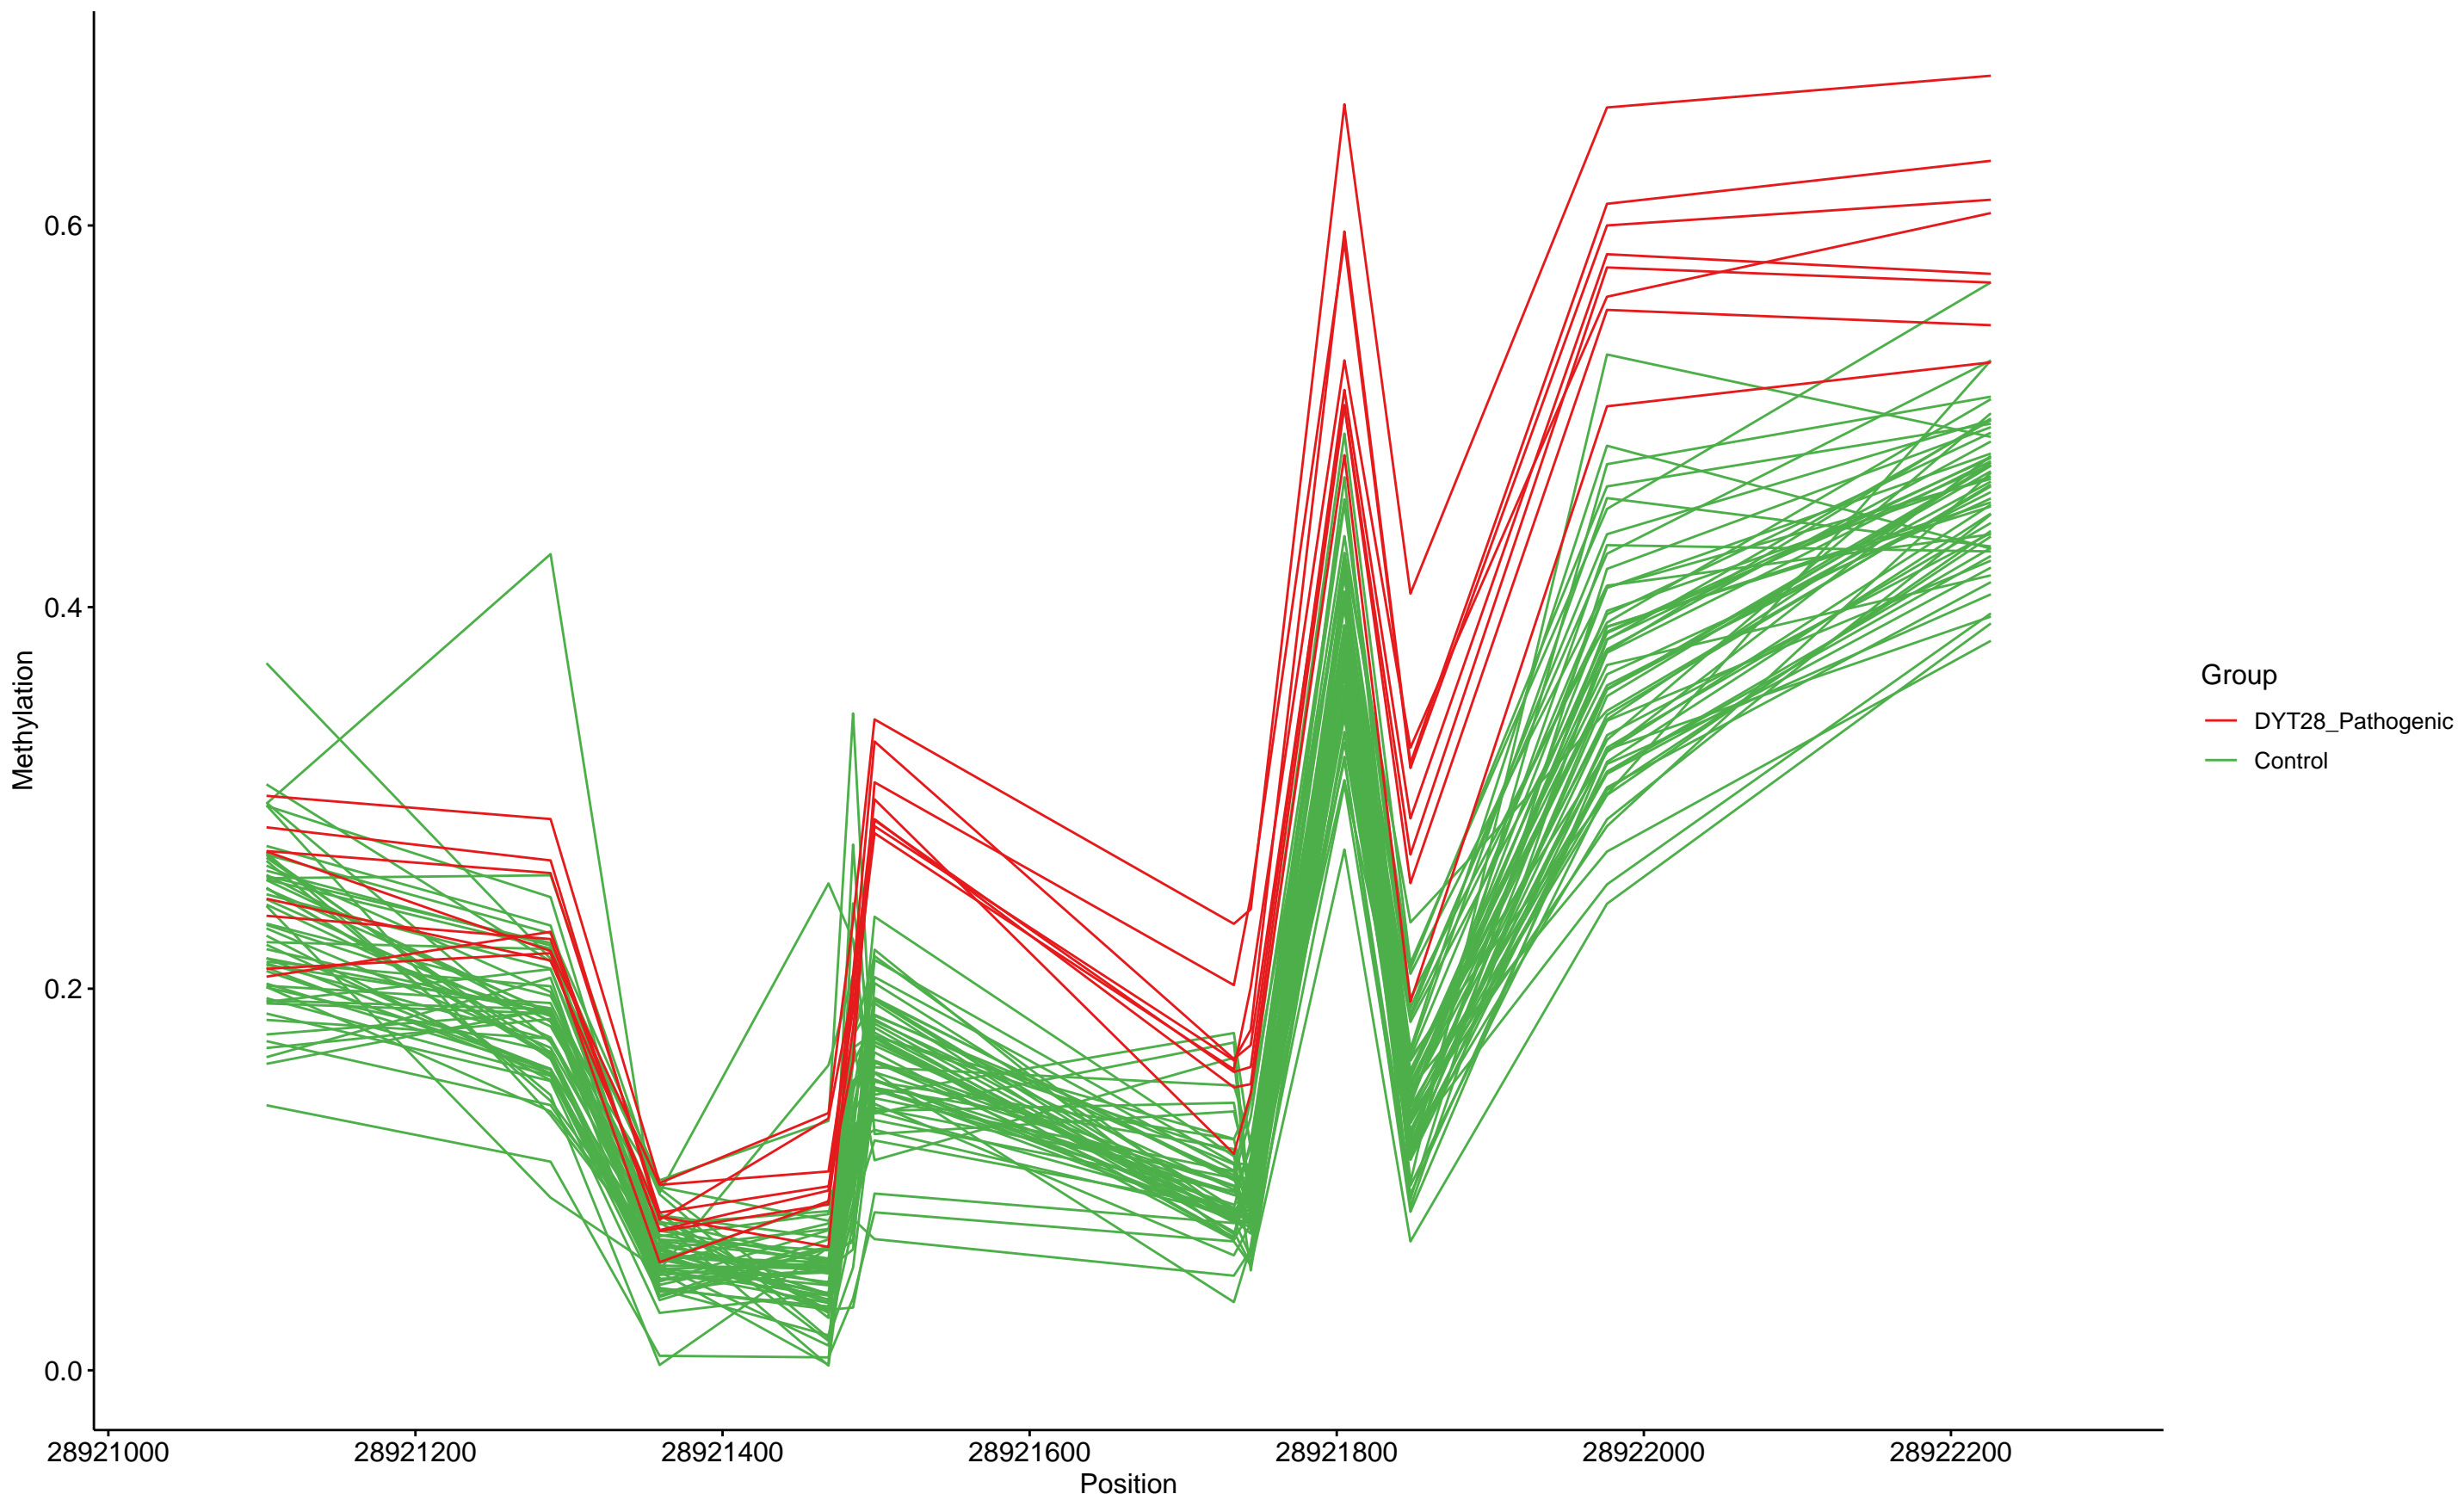

Region 31: chr14:23478970–23479801

Fisher:  $3.31526030629194e-54$

Stouffer:  $4.15498323873376e-50$

Mean difference: 0.126892498453546

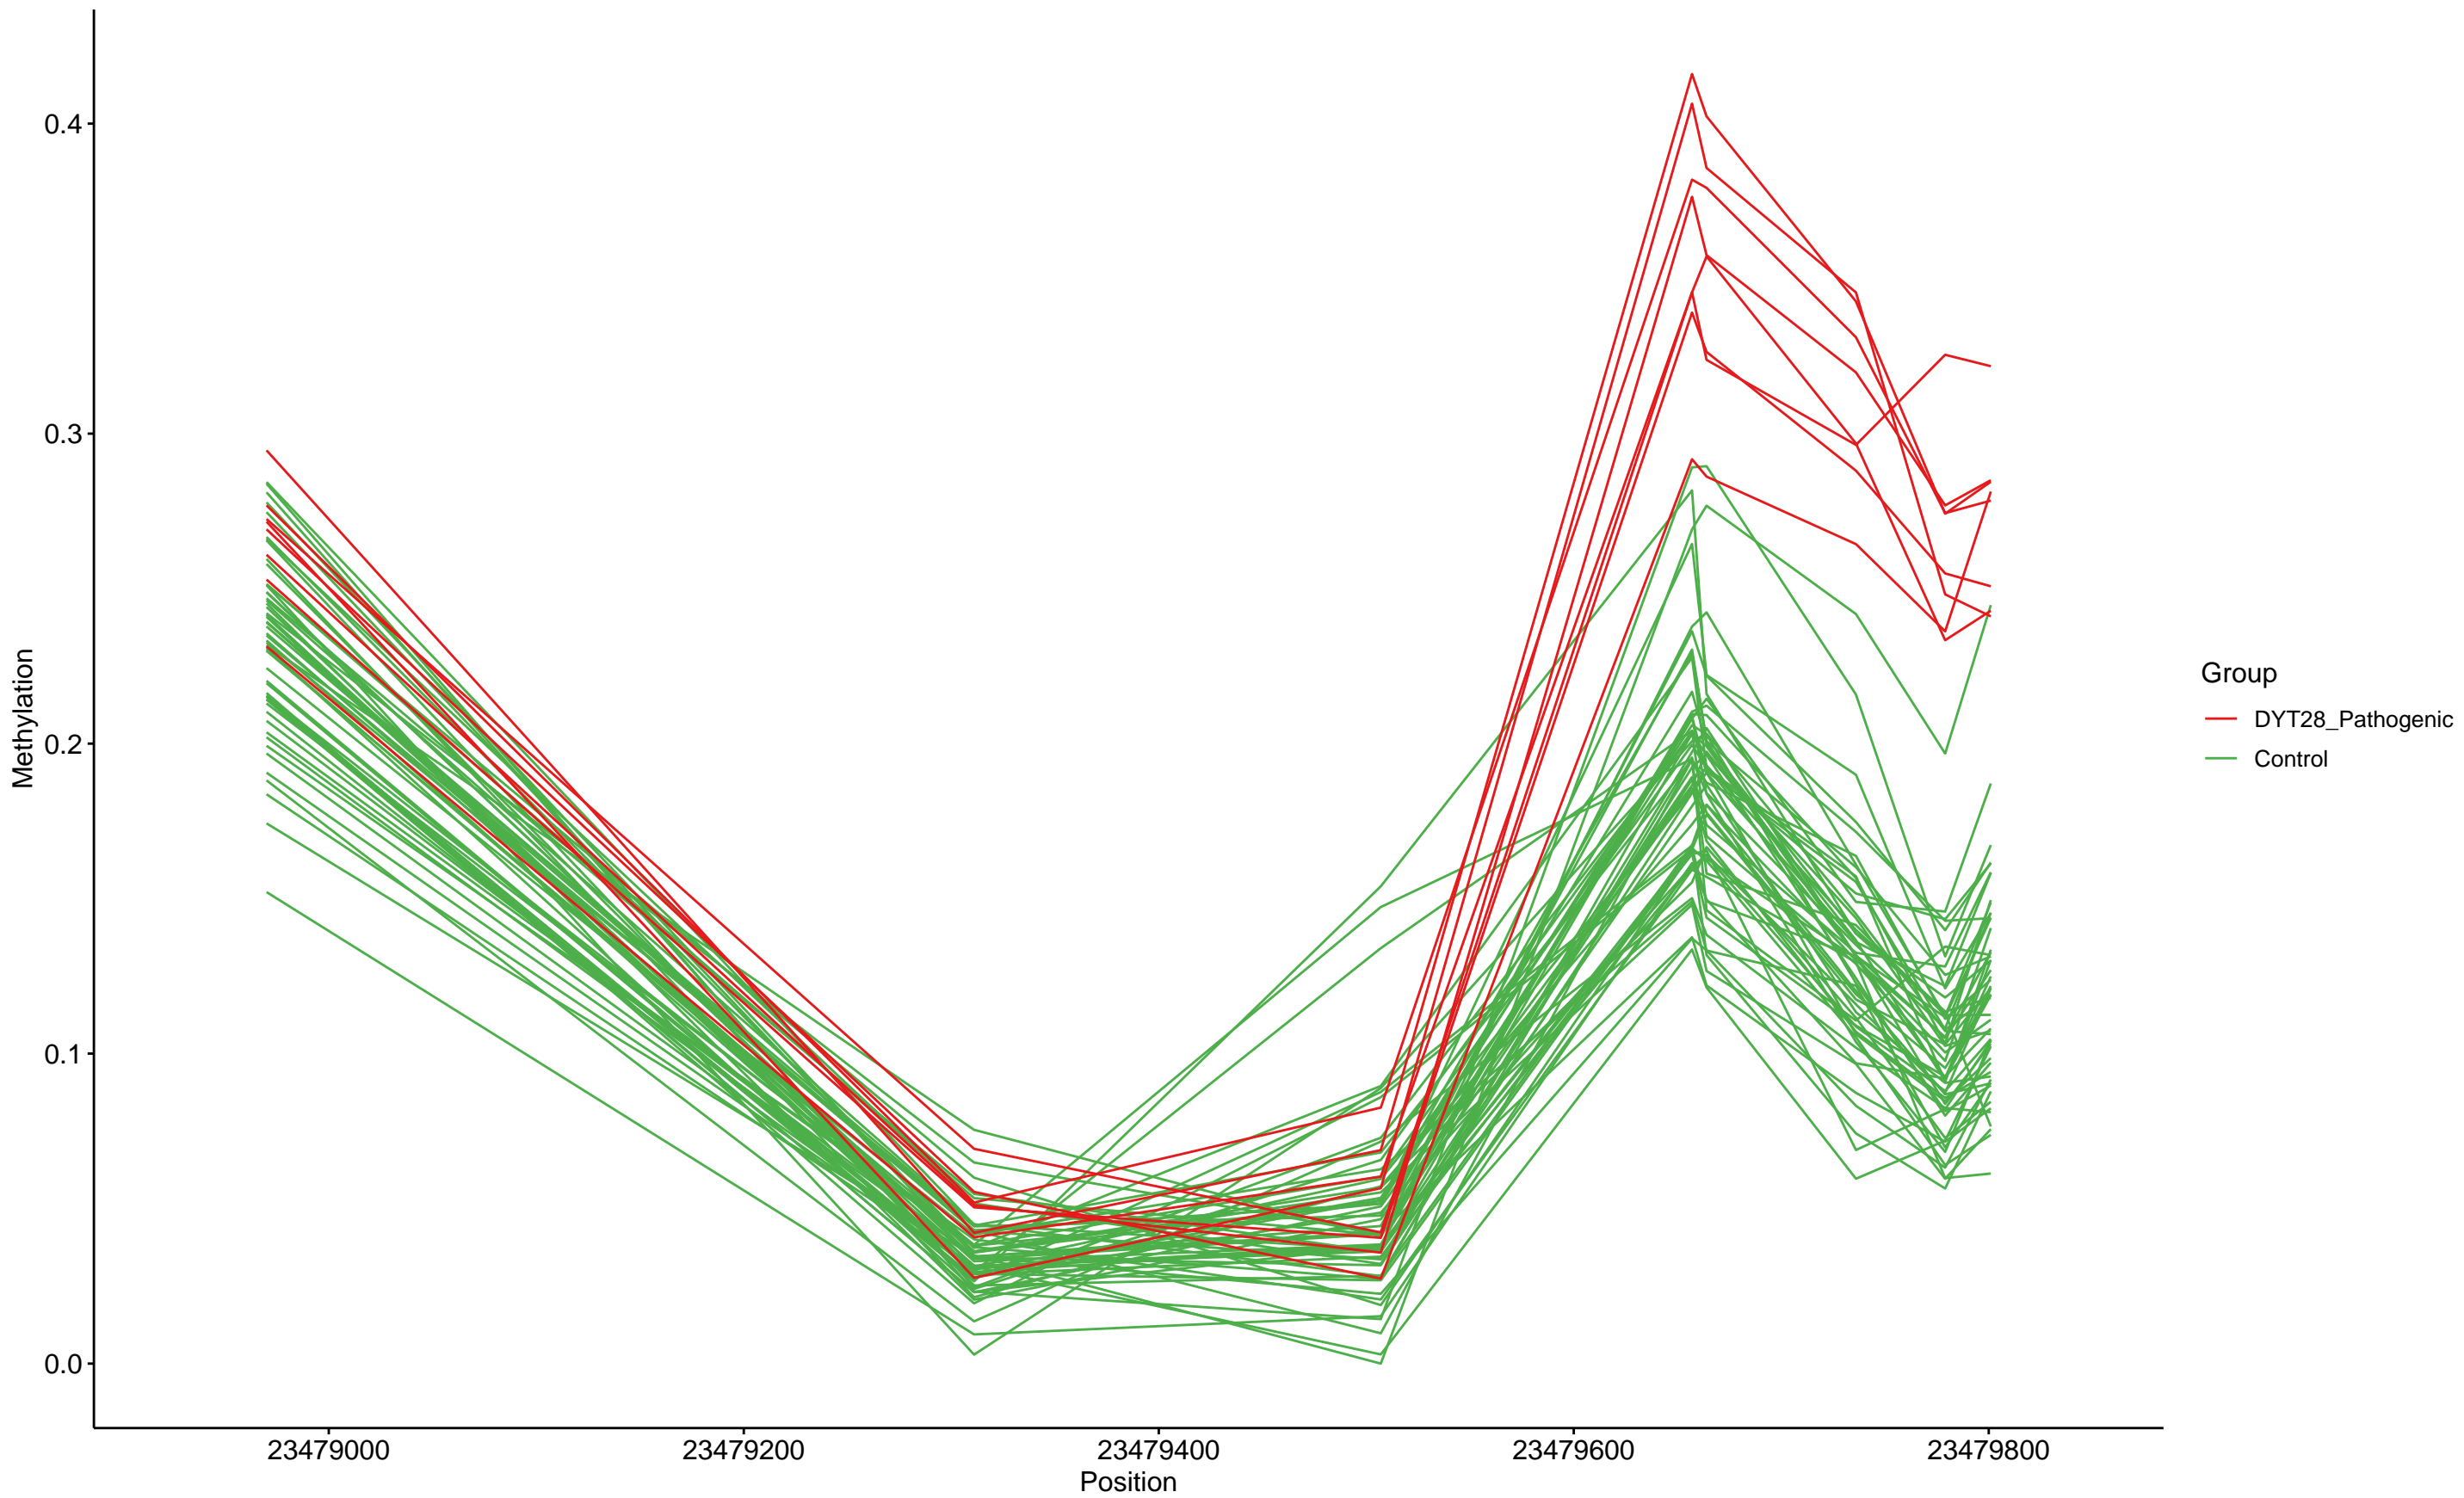



Region 32: chr4:99064102-99065442

Fisher: 5.46155097903213e-54

Stouffer: 1.37909851153382e-54

Mean difference: 0.181689642205832

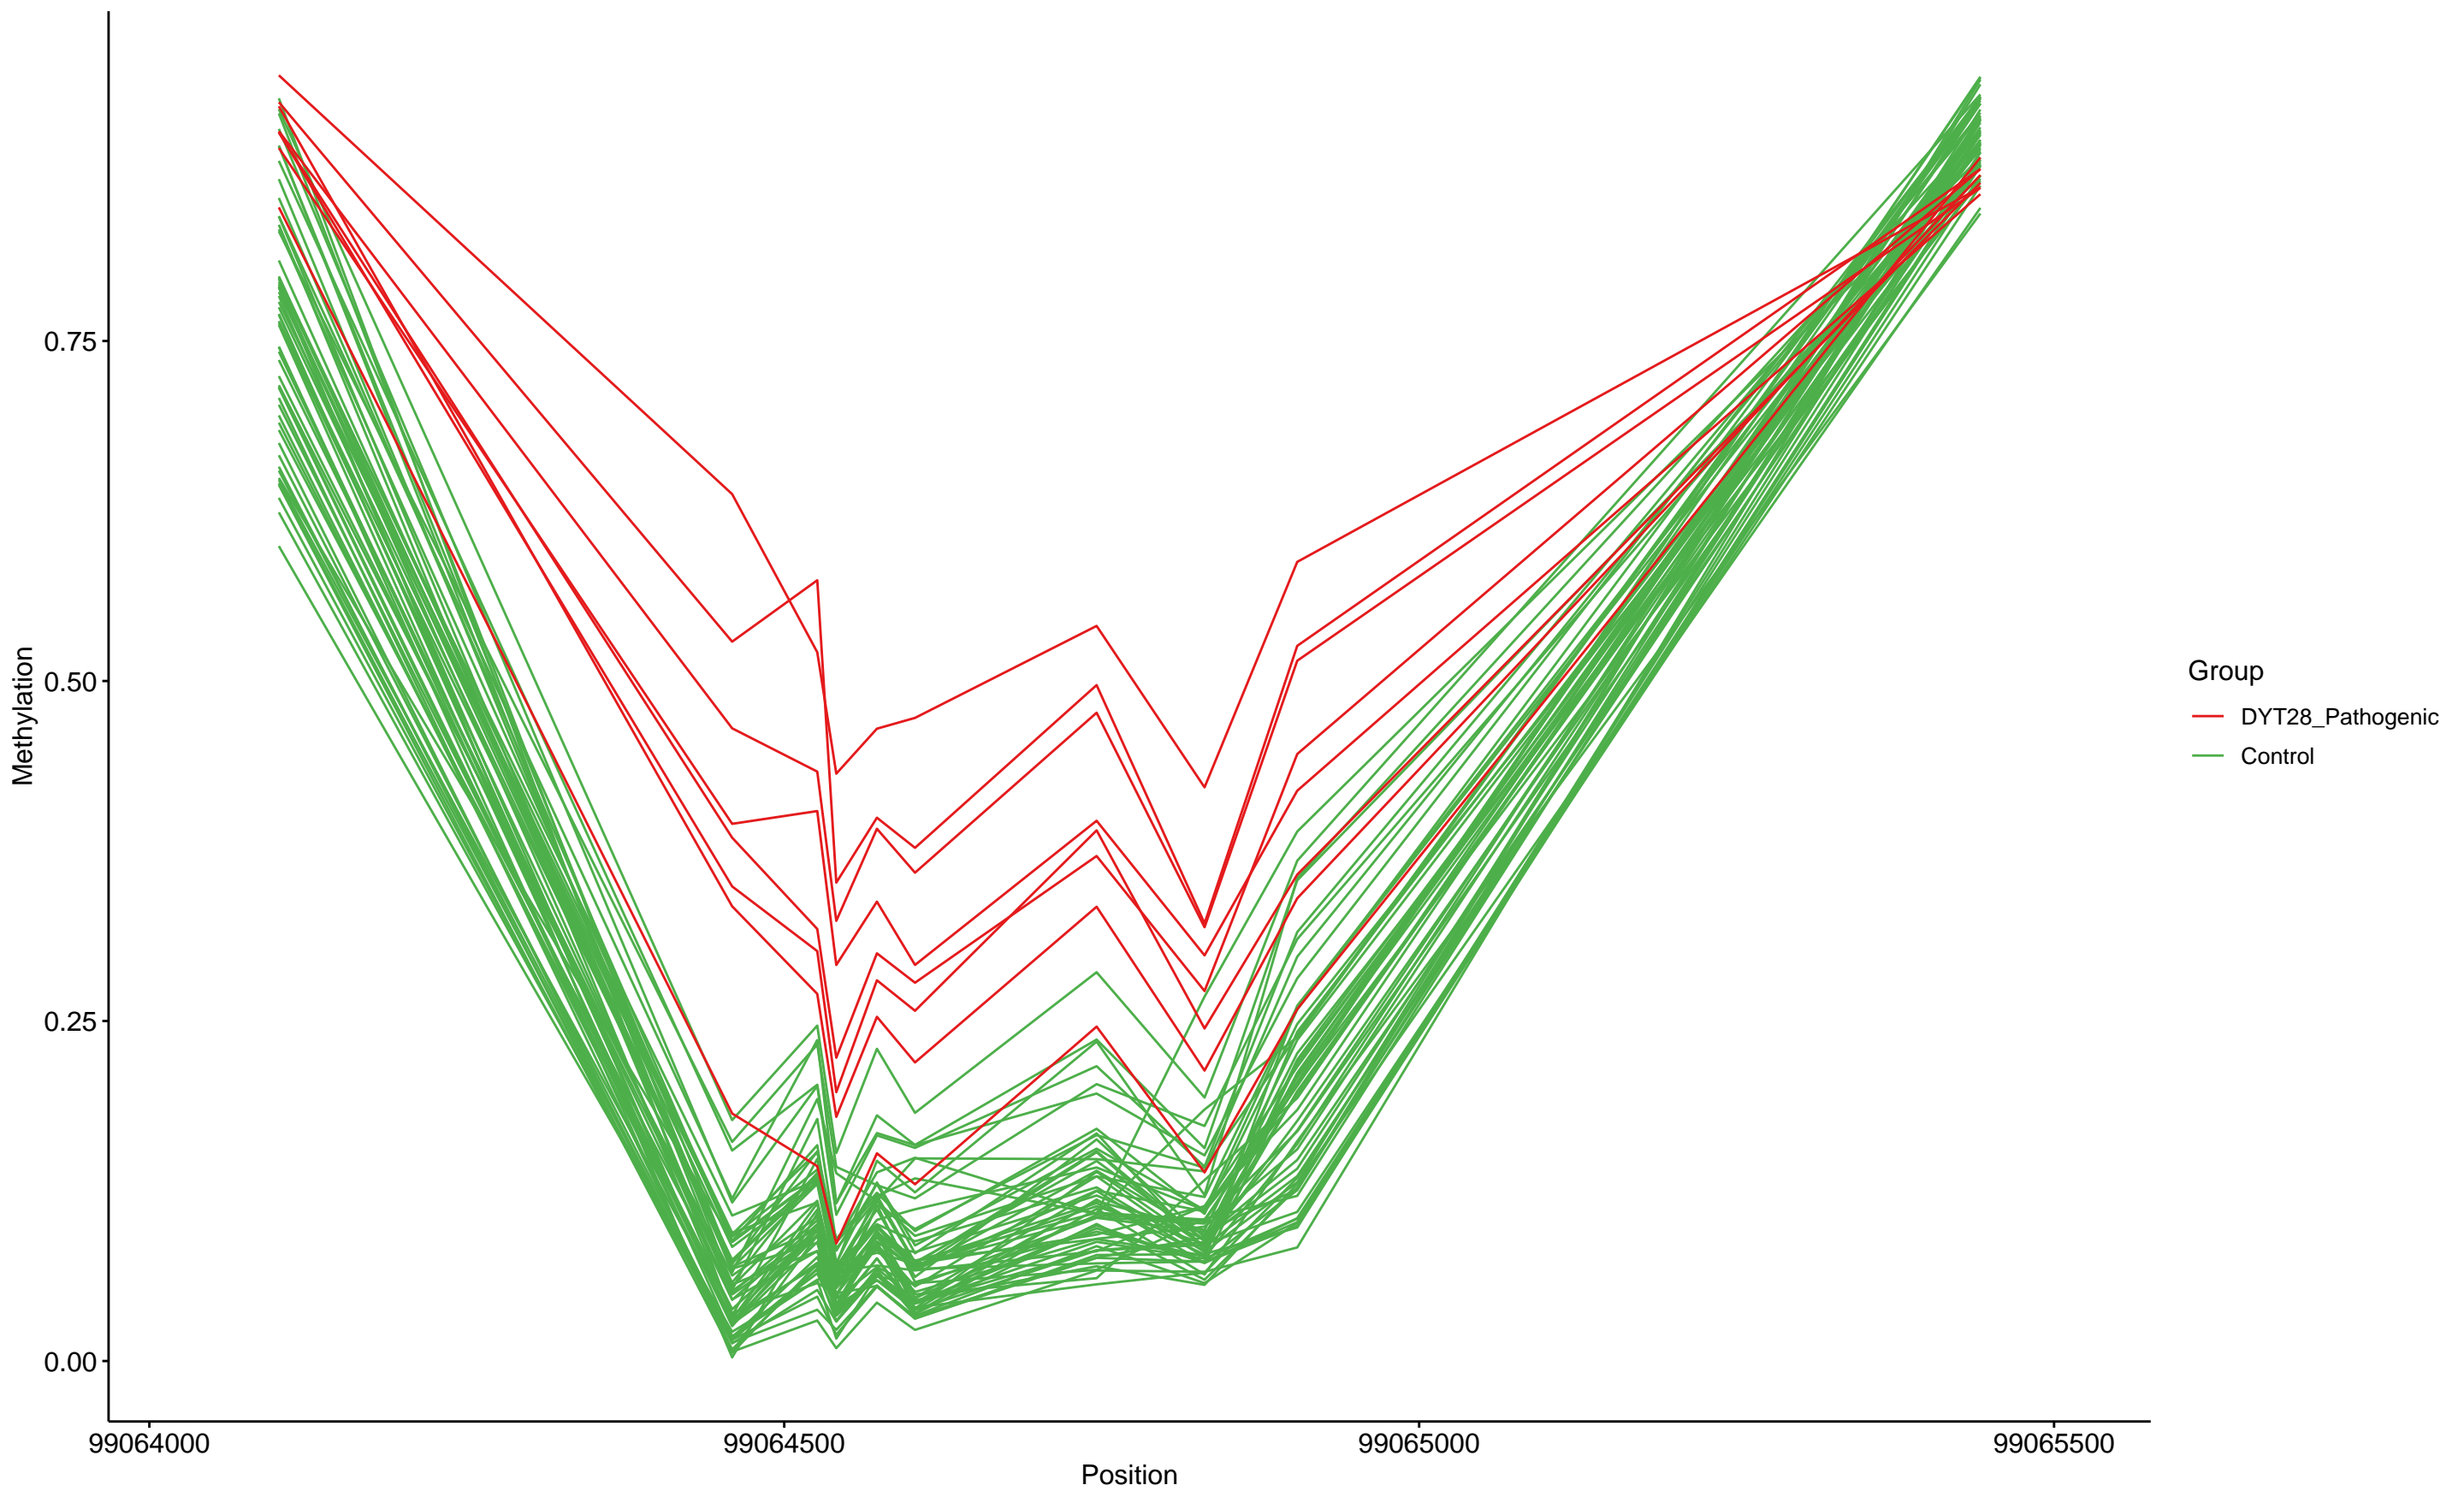



Region 33: chr17:55121964–55125008

Fisher:  $6.3350505350863e-54$

Stouffer:  $4.43477919849843e-52$

Mean difference: 0.167088091291506

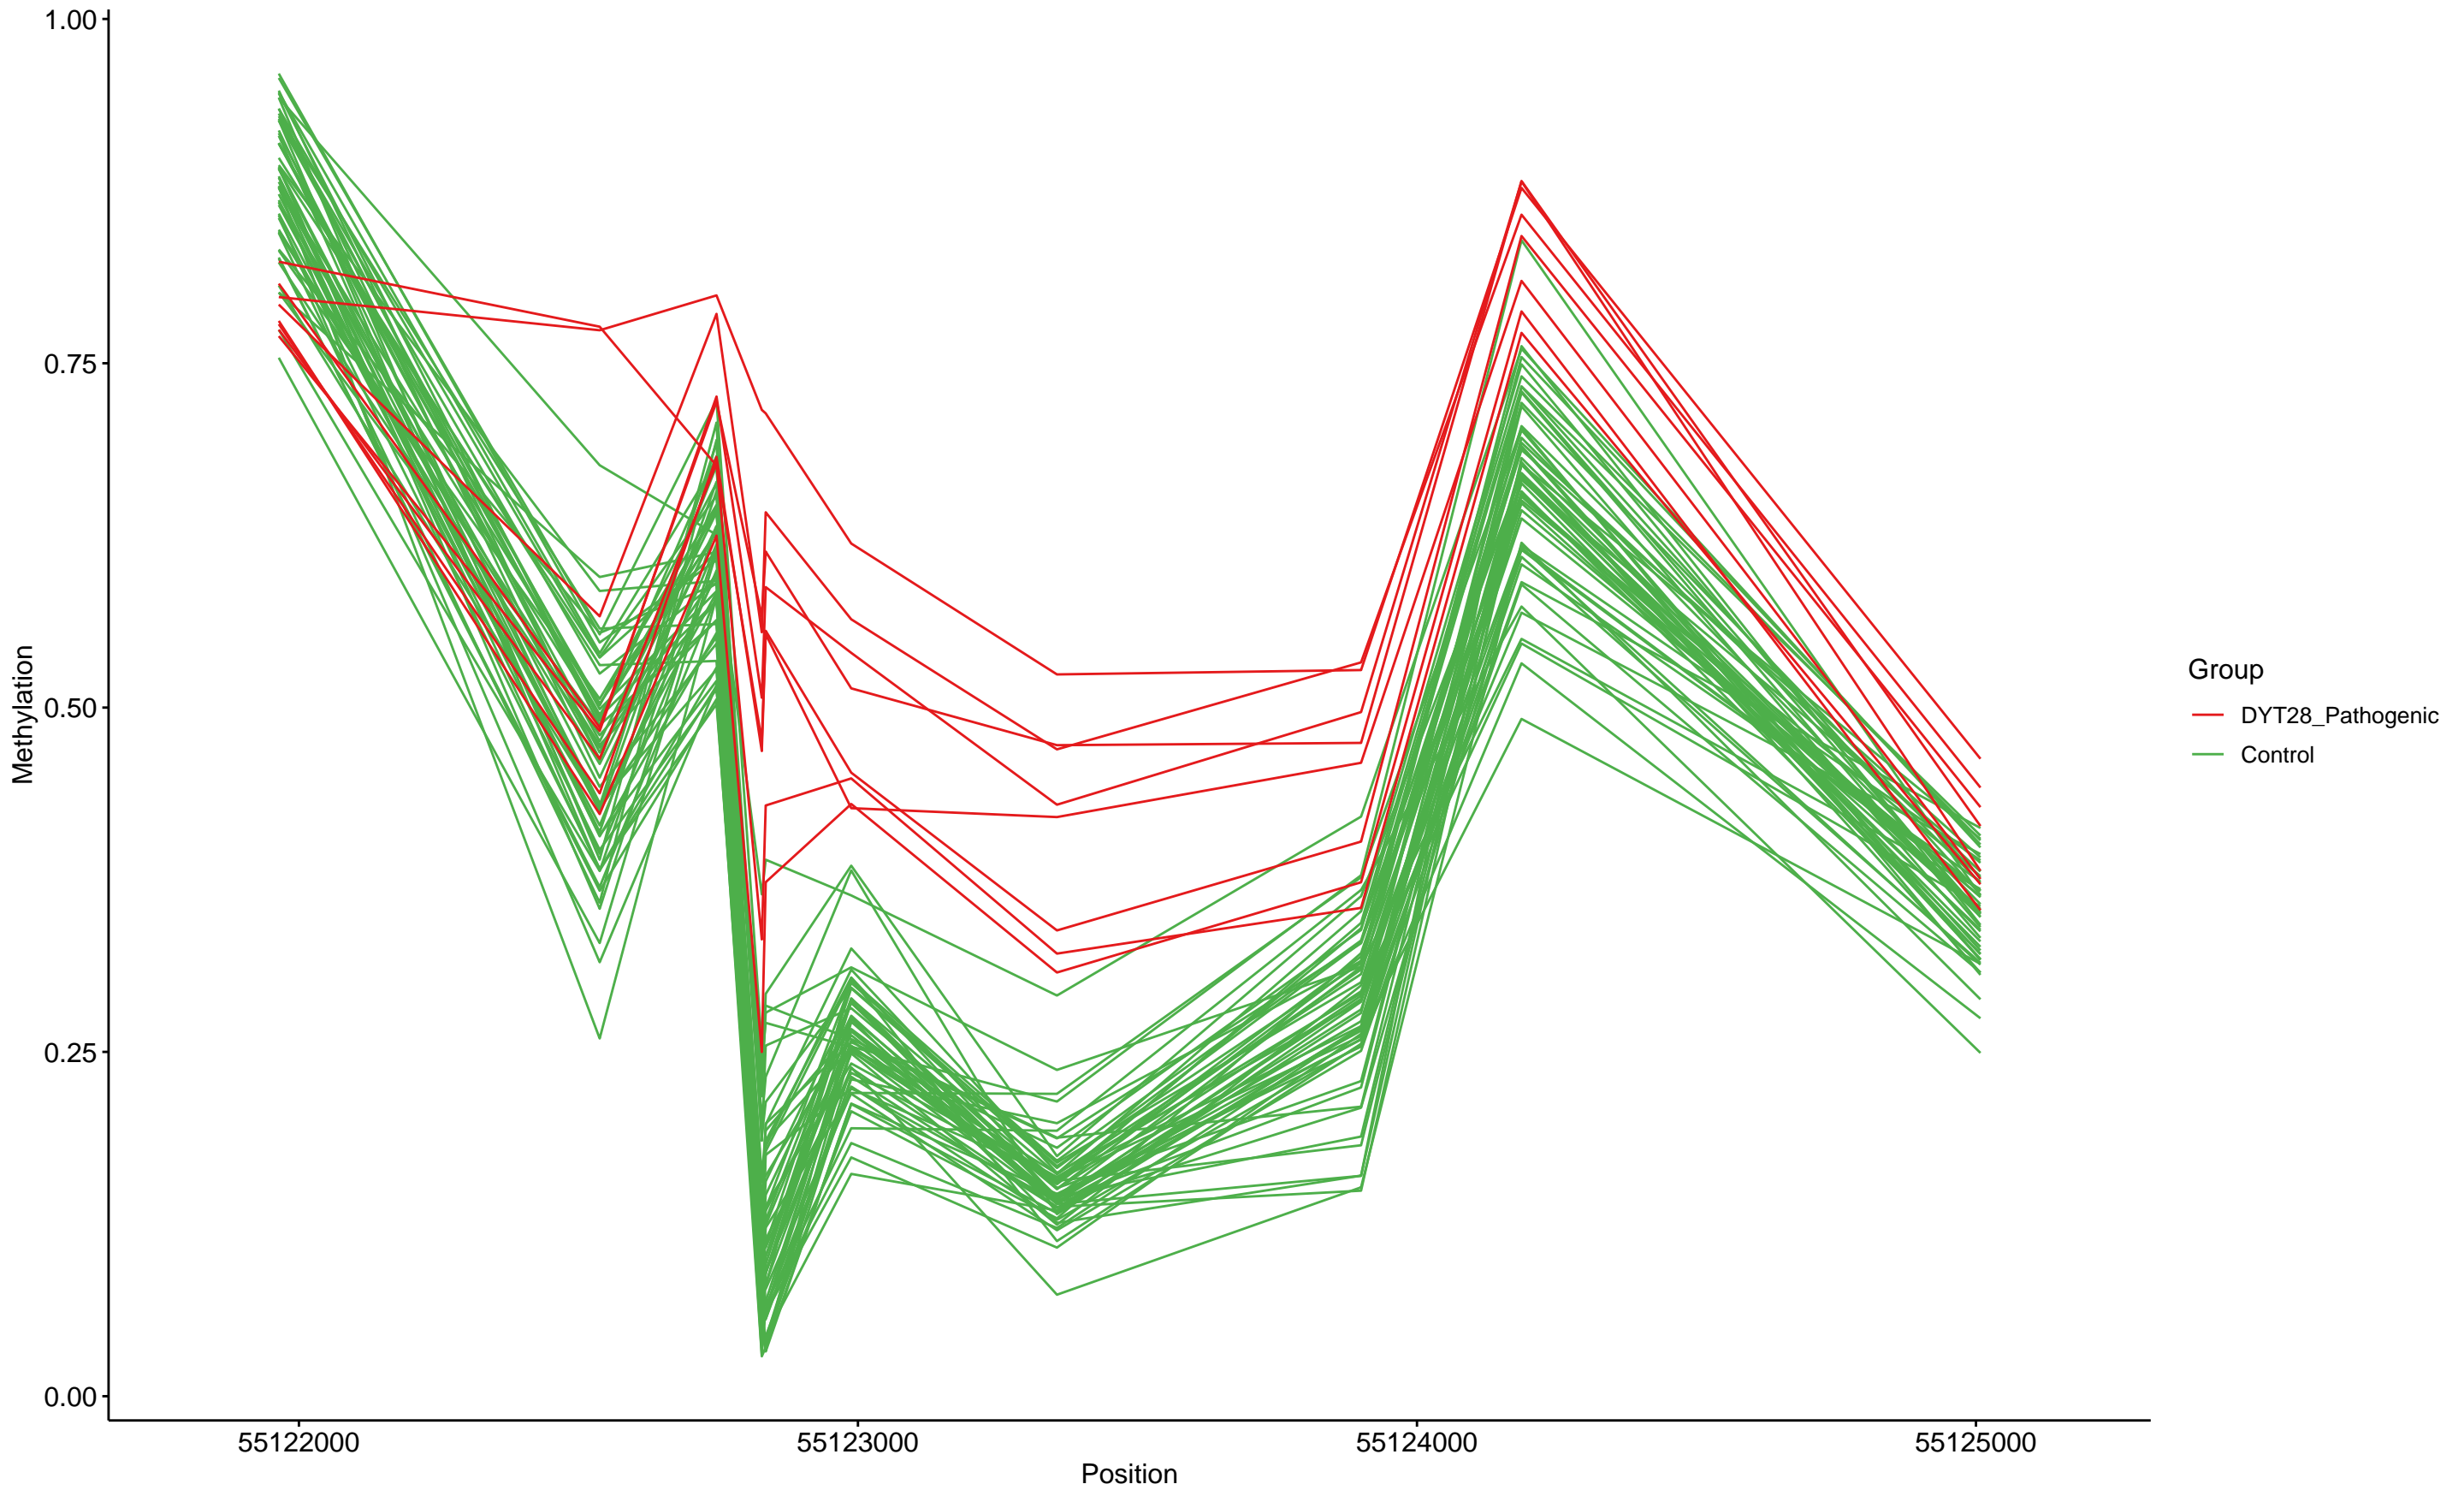

Region 34: chr6:27647896–27648895

Fisher:  $9.43837281950584e-54$

Stouffer:  $5.61756895765884e-56$

Mean difference: 0.16836676314727

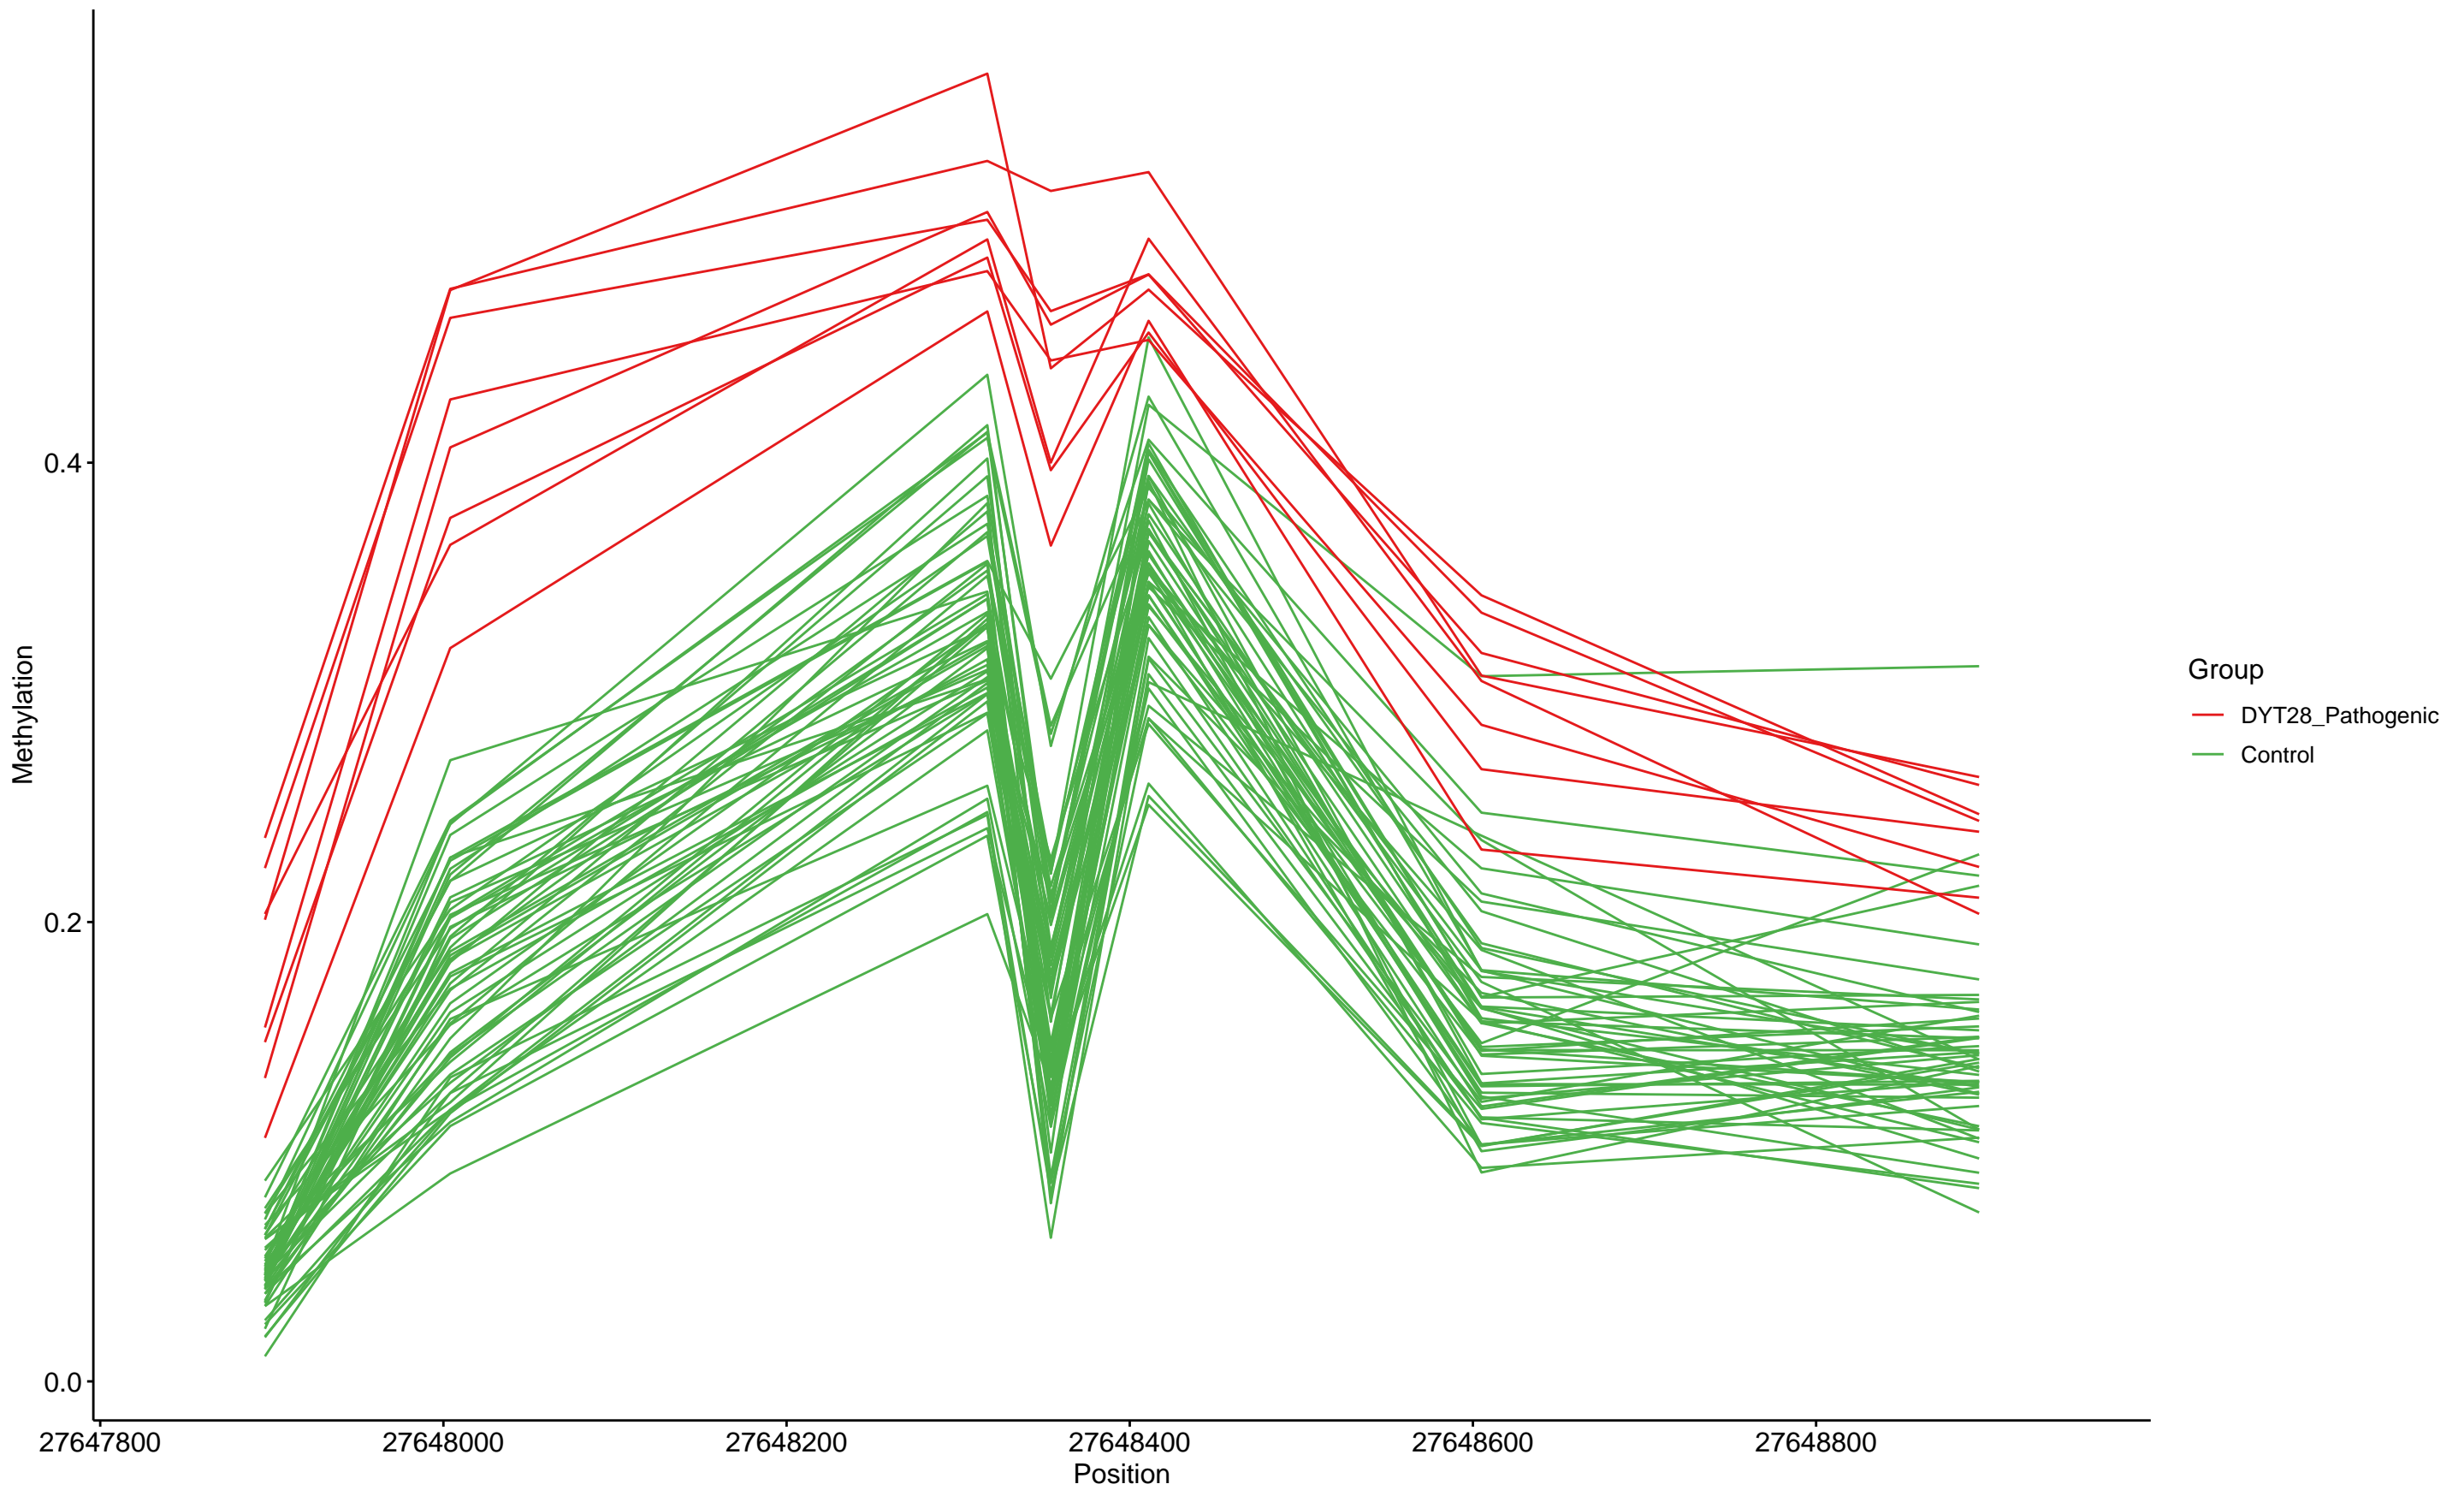

Region 35: chr4:104640197-104641896

Fisher:  $1.90215918218311e-53$

Stouffer:  $7.43714429754182e-55$

Mean difference: 0.114765031096928

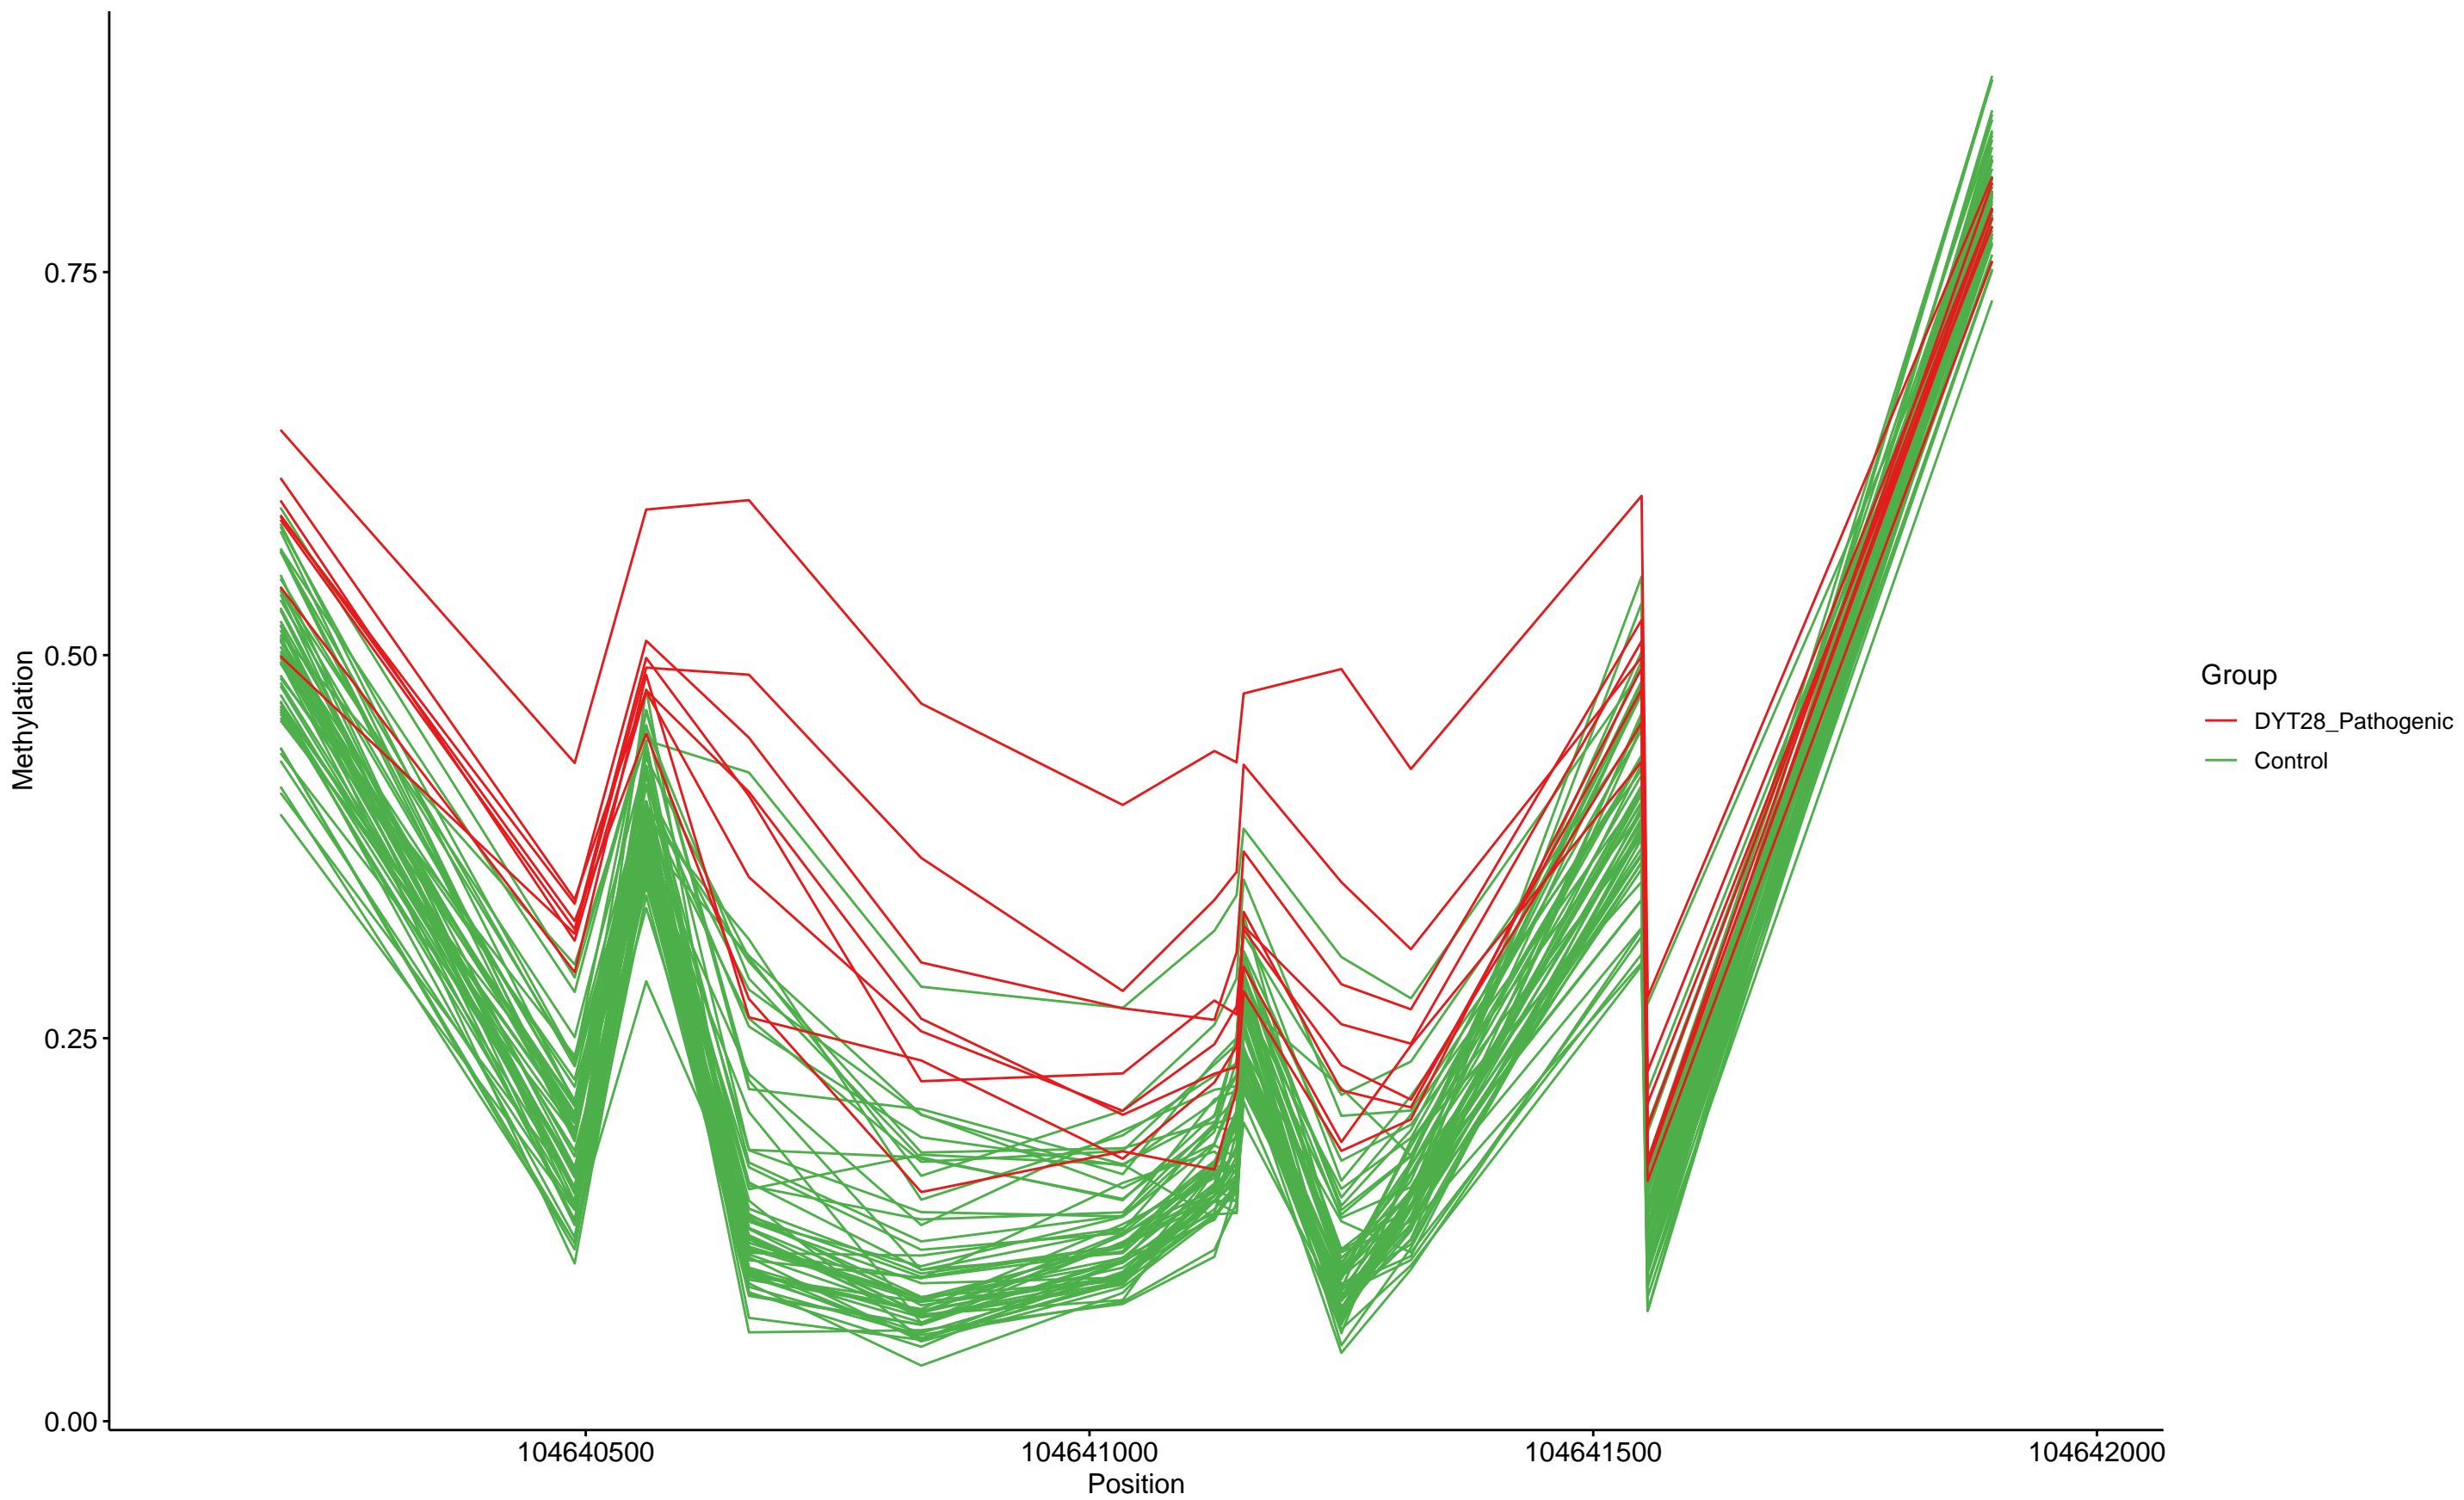



Region 36: chr14:21090883–21095414

Fisher: 3.43484863543285e-53

Stouffer: 3.80214439441548e-53

Mean difference: 0.124289977863755

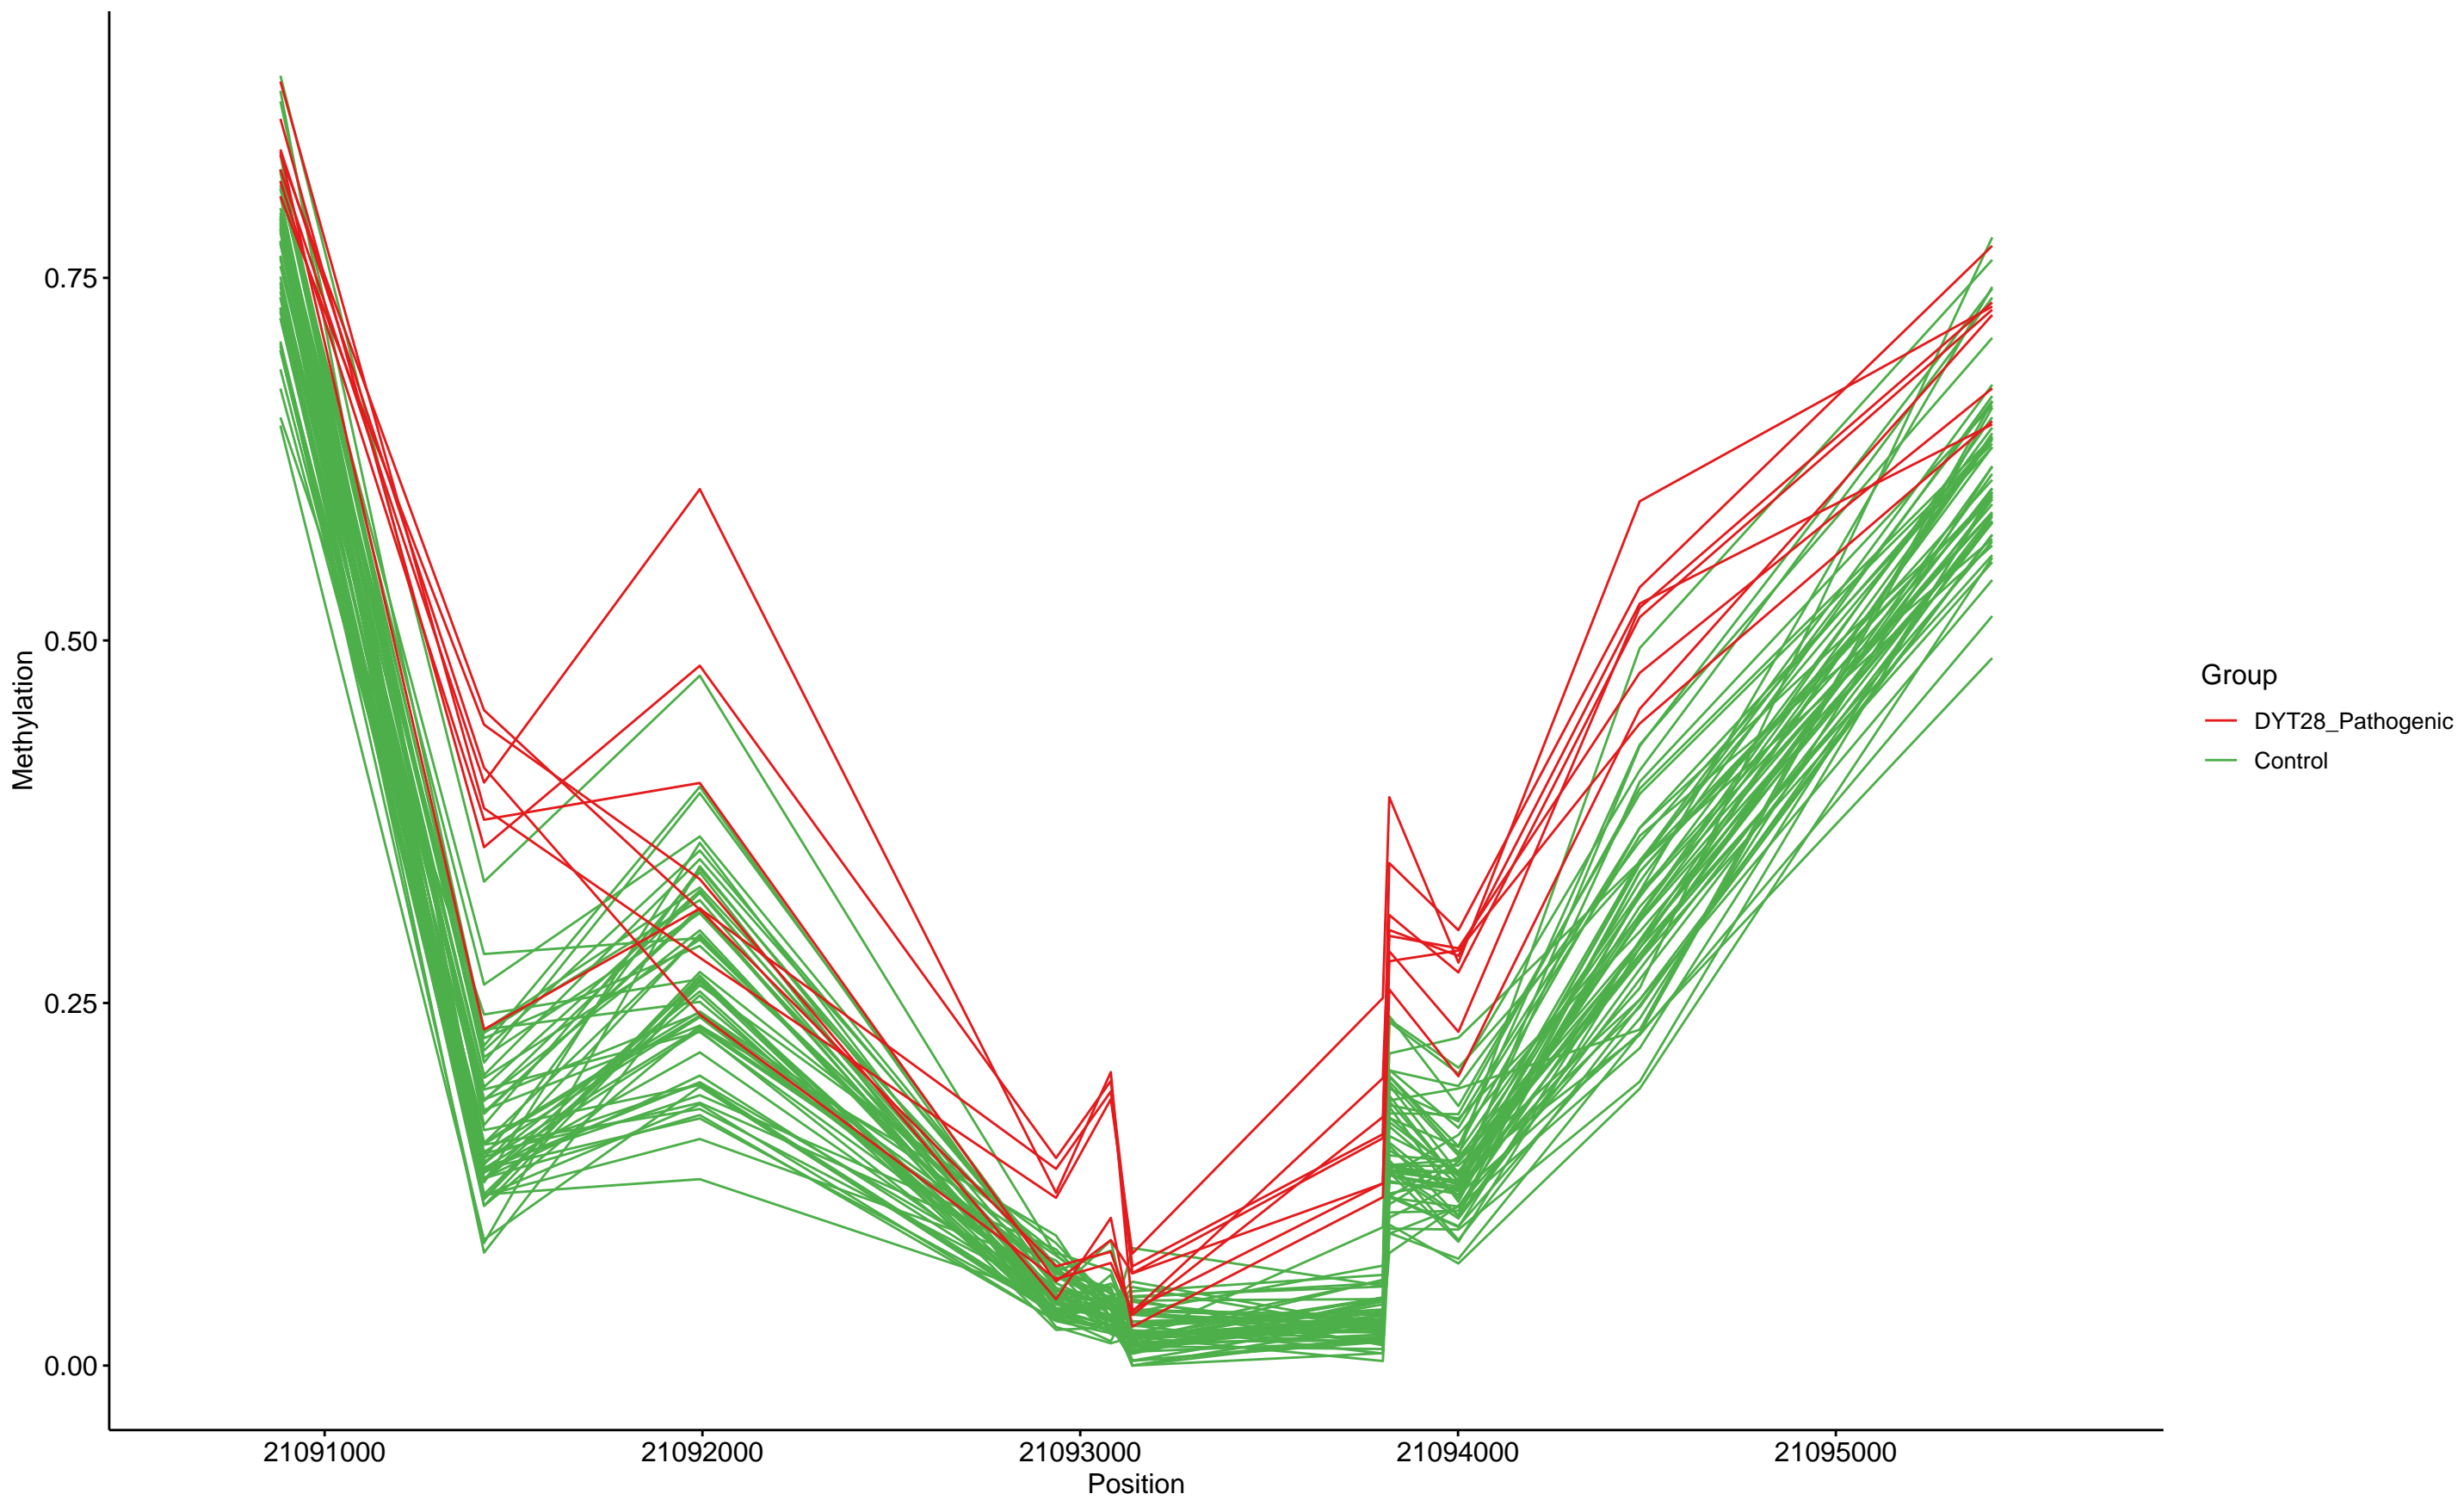



Region 37: chr2:71205052-71206528

Fisher: 2.58646502578219e-52

Stouffer: 4.45648251595386e-52

Mean difference: 0.109374718497371

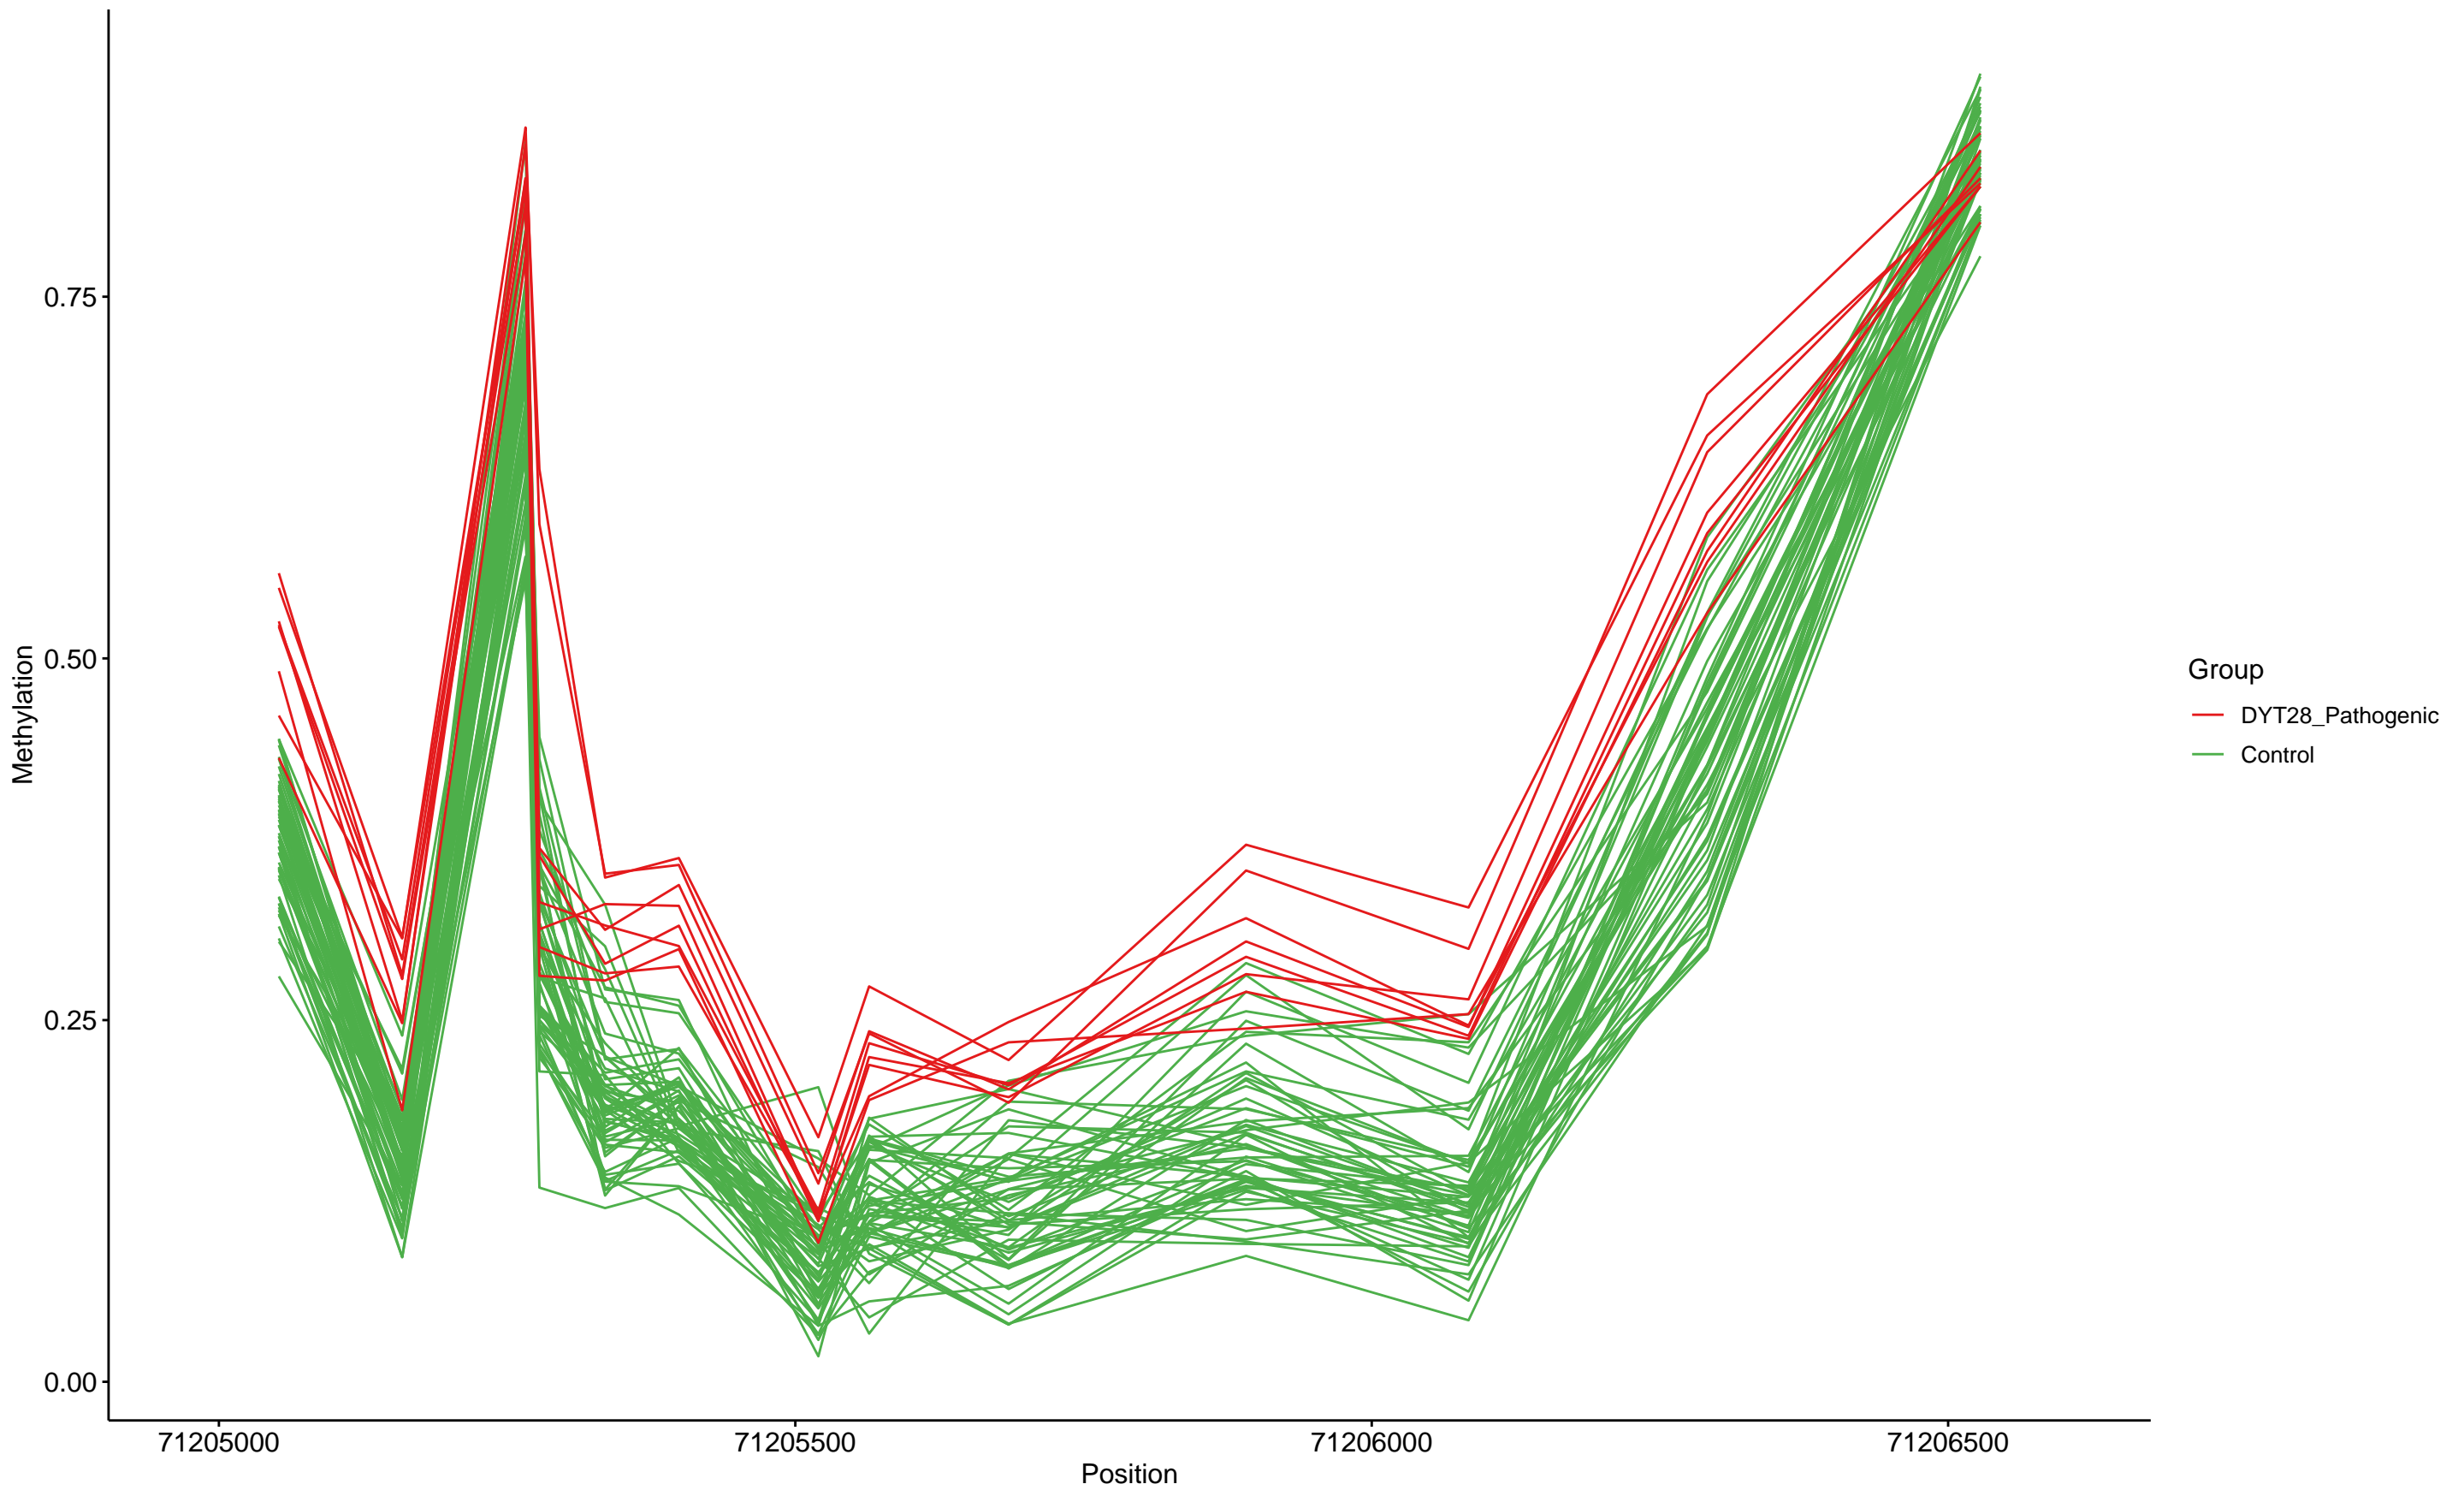

Region 38: chr3:52351355-52351963

Fisher: 7.31916098973452e-52

Stouffer: 6.63955108000881e-54

Mean difference: 0.205720262178768

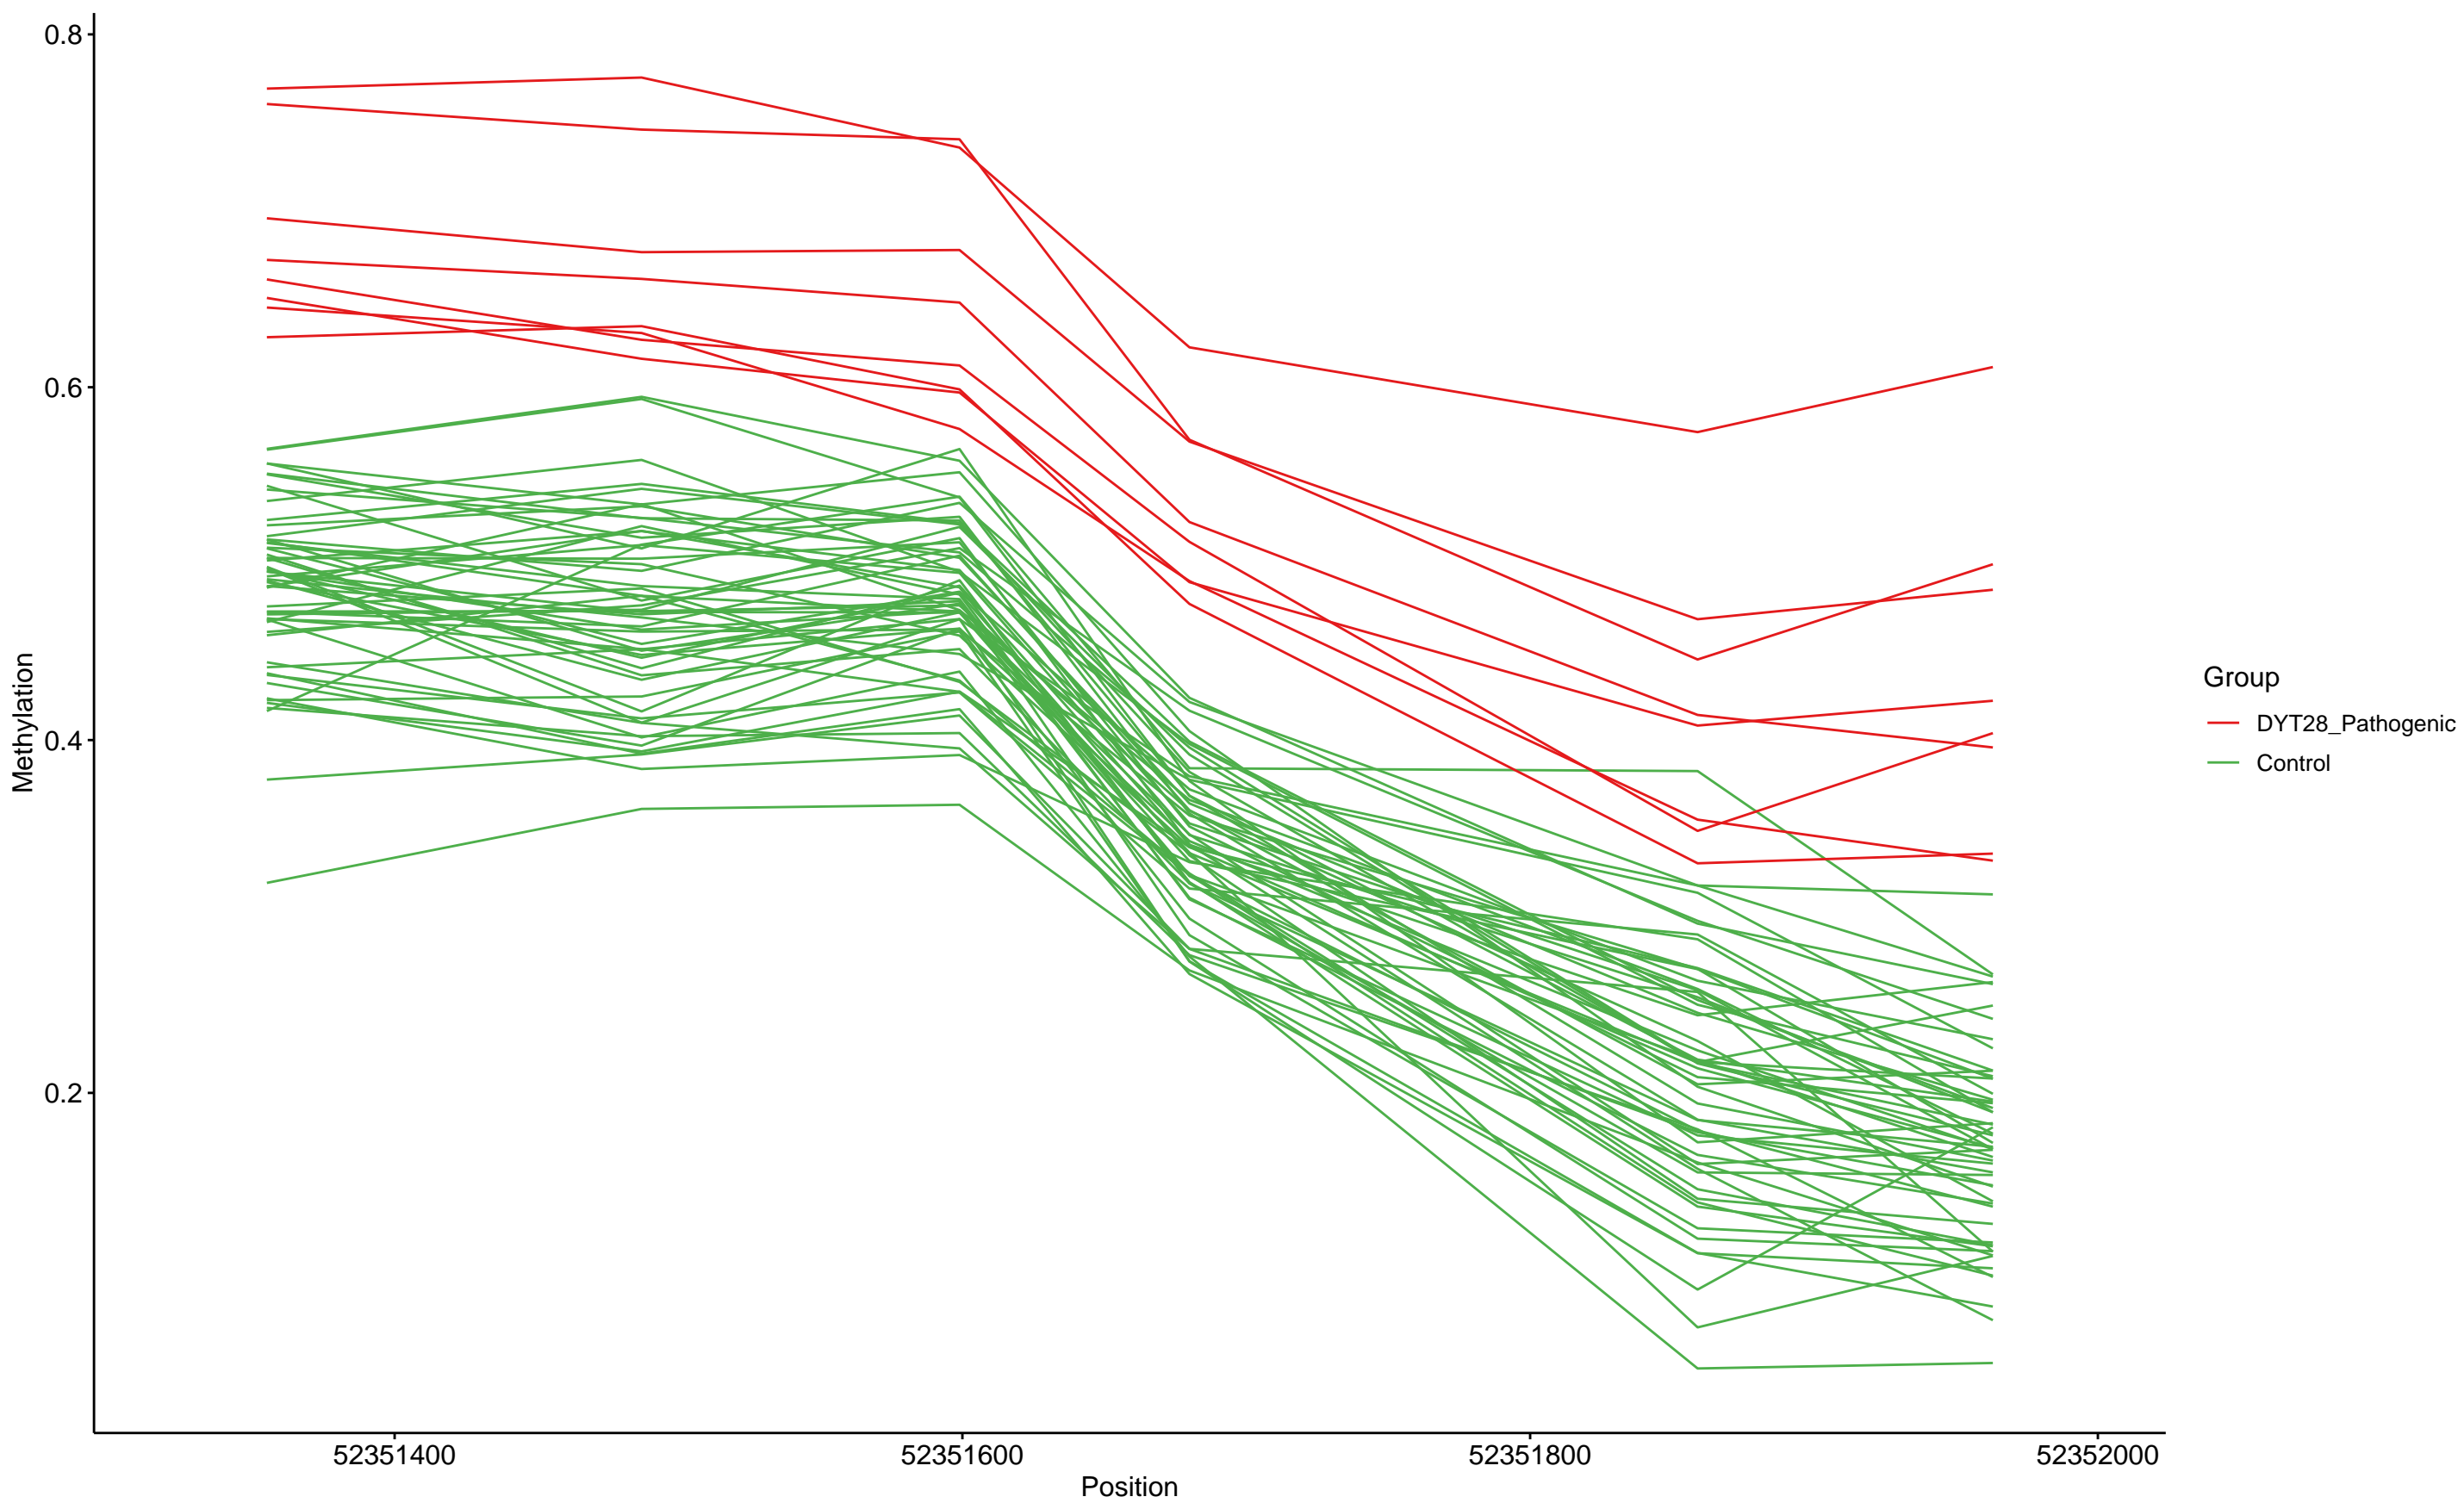

Region 39: chr4:118005533–118008020

Fisher: 1.70451067868218e-51

Stouffer: 5.58617250622211e-46

Mean difference: 0.101173939490043

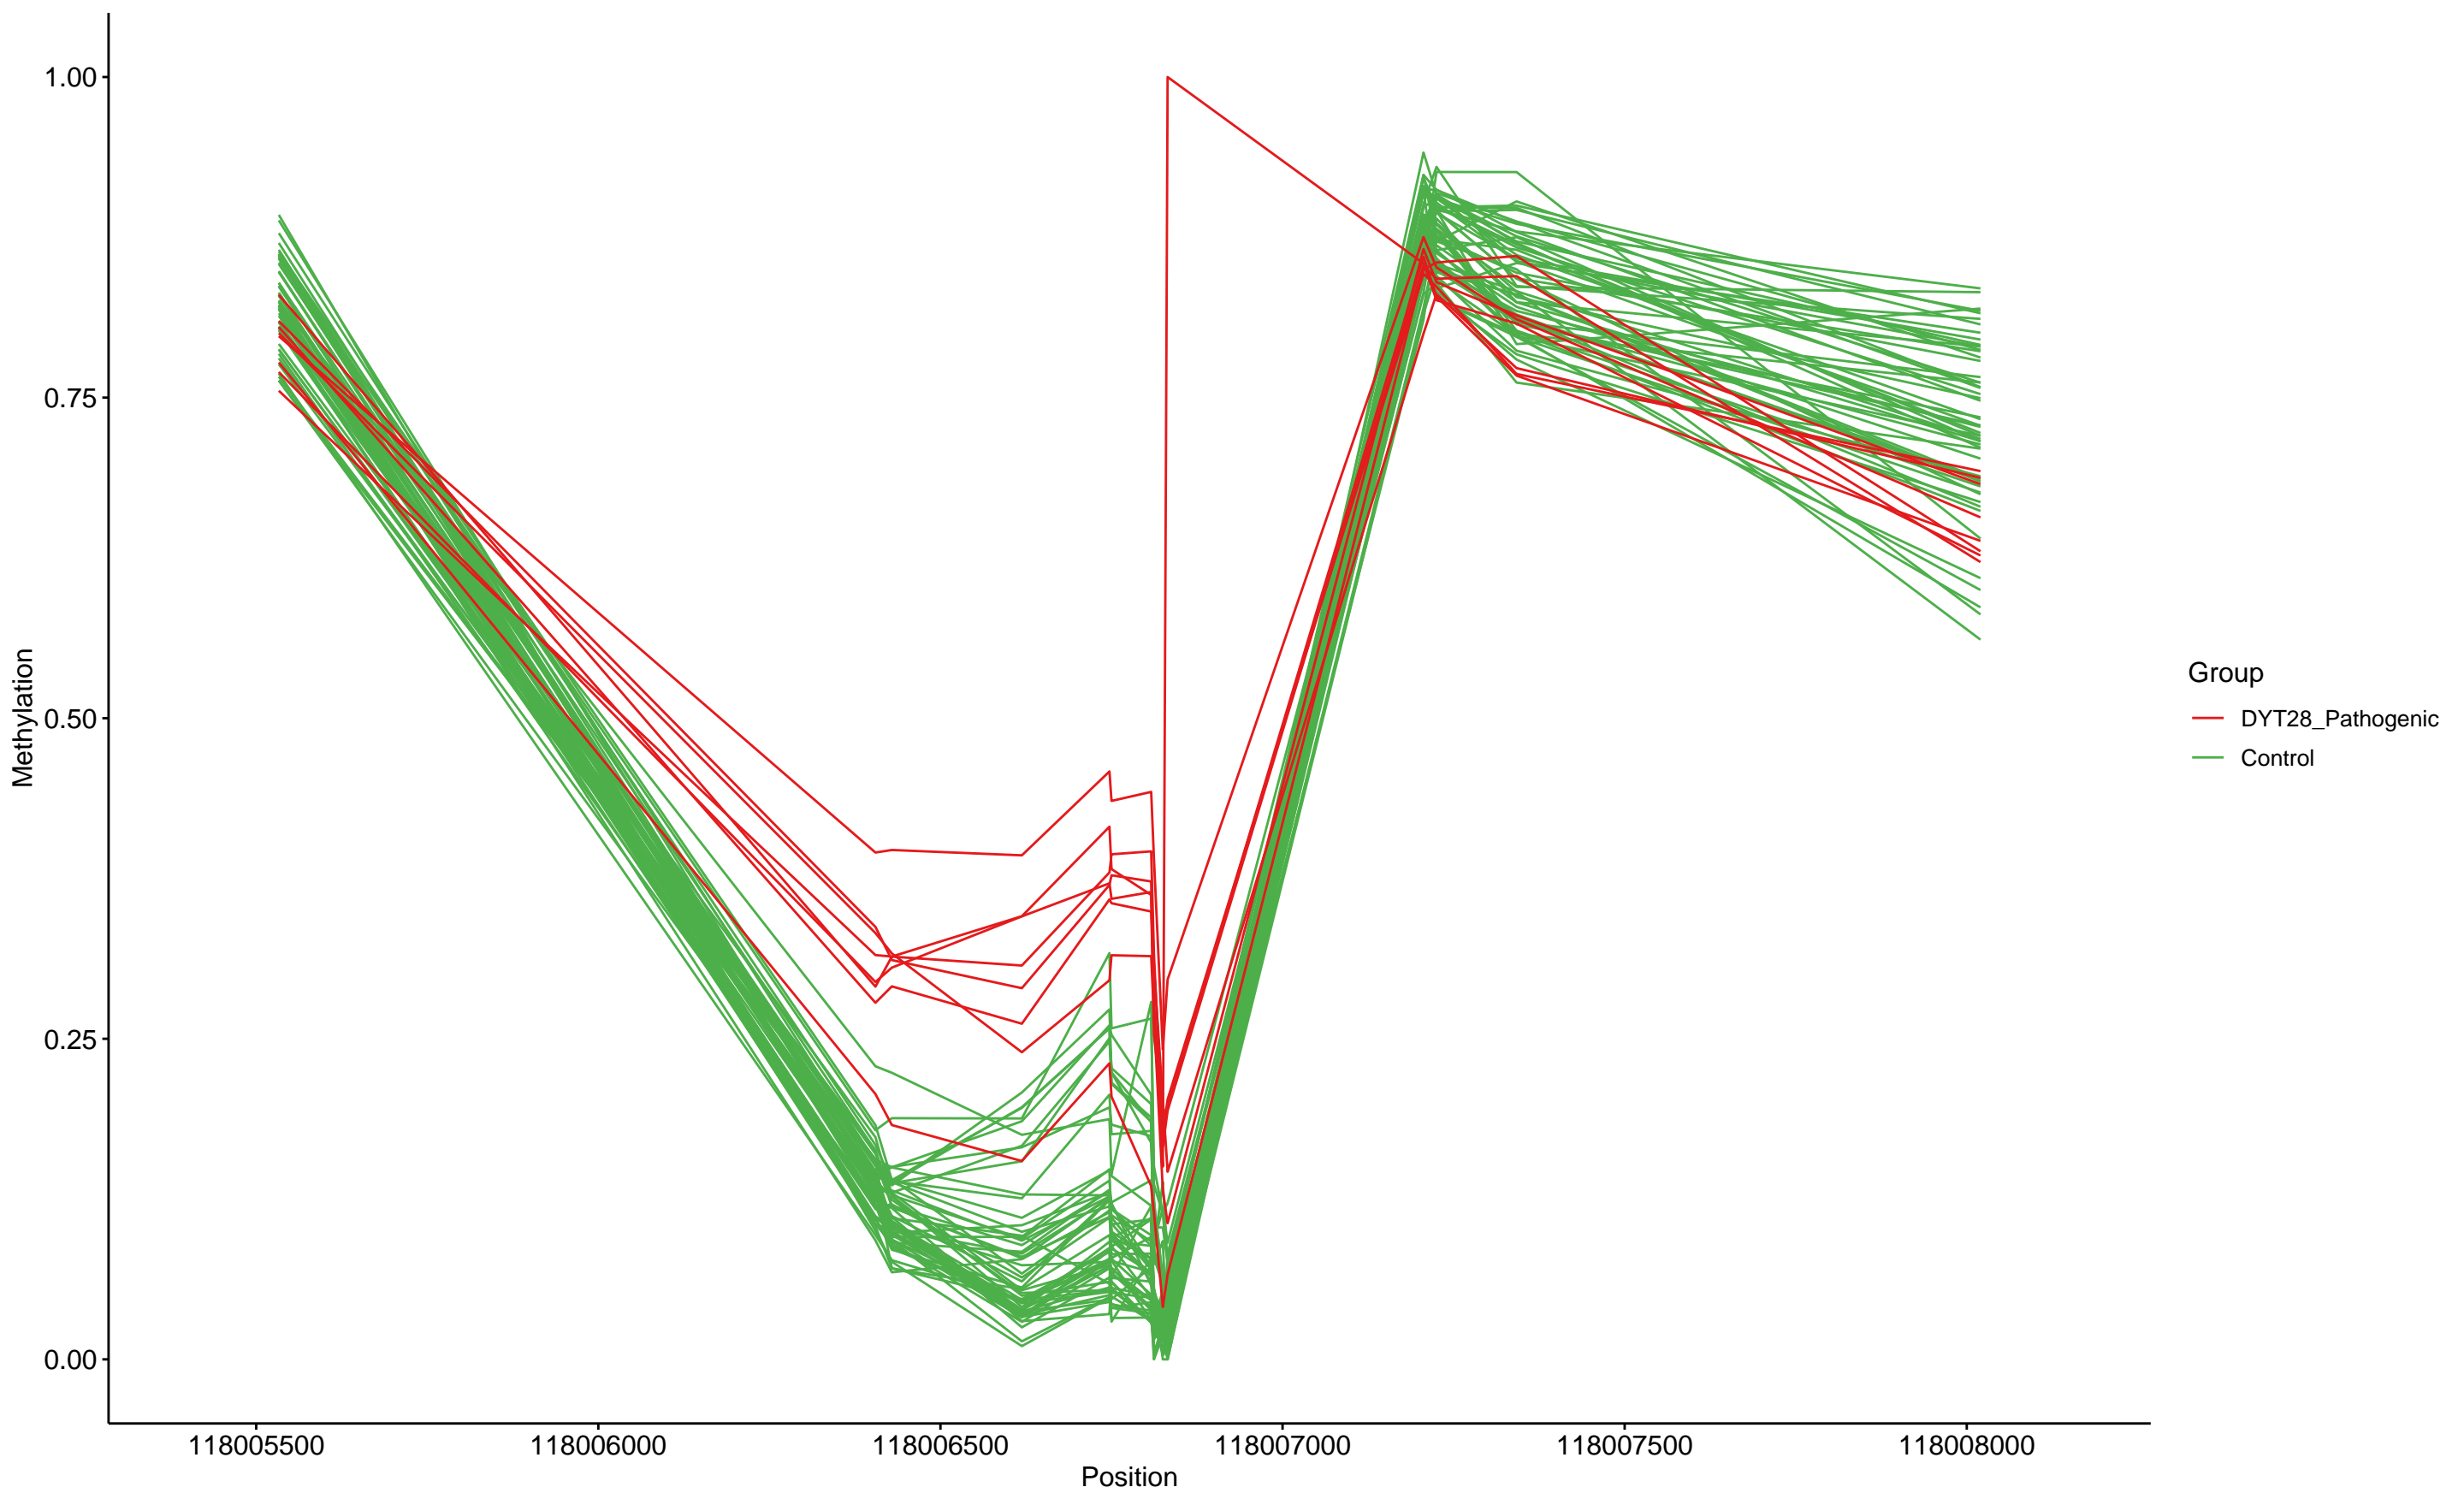

Region 40: chr6:150346721–150347870

Fisher: 3.32044396678773e-51

Stouffer: 3.02134148884769e-50

Mean difference: 0.130787812665327

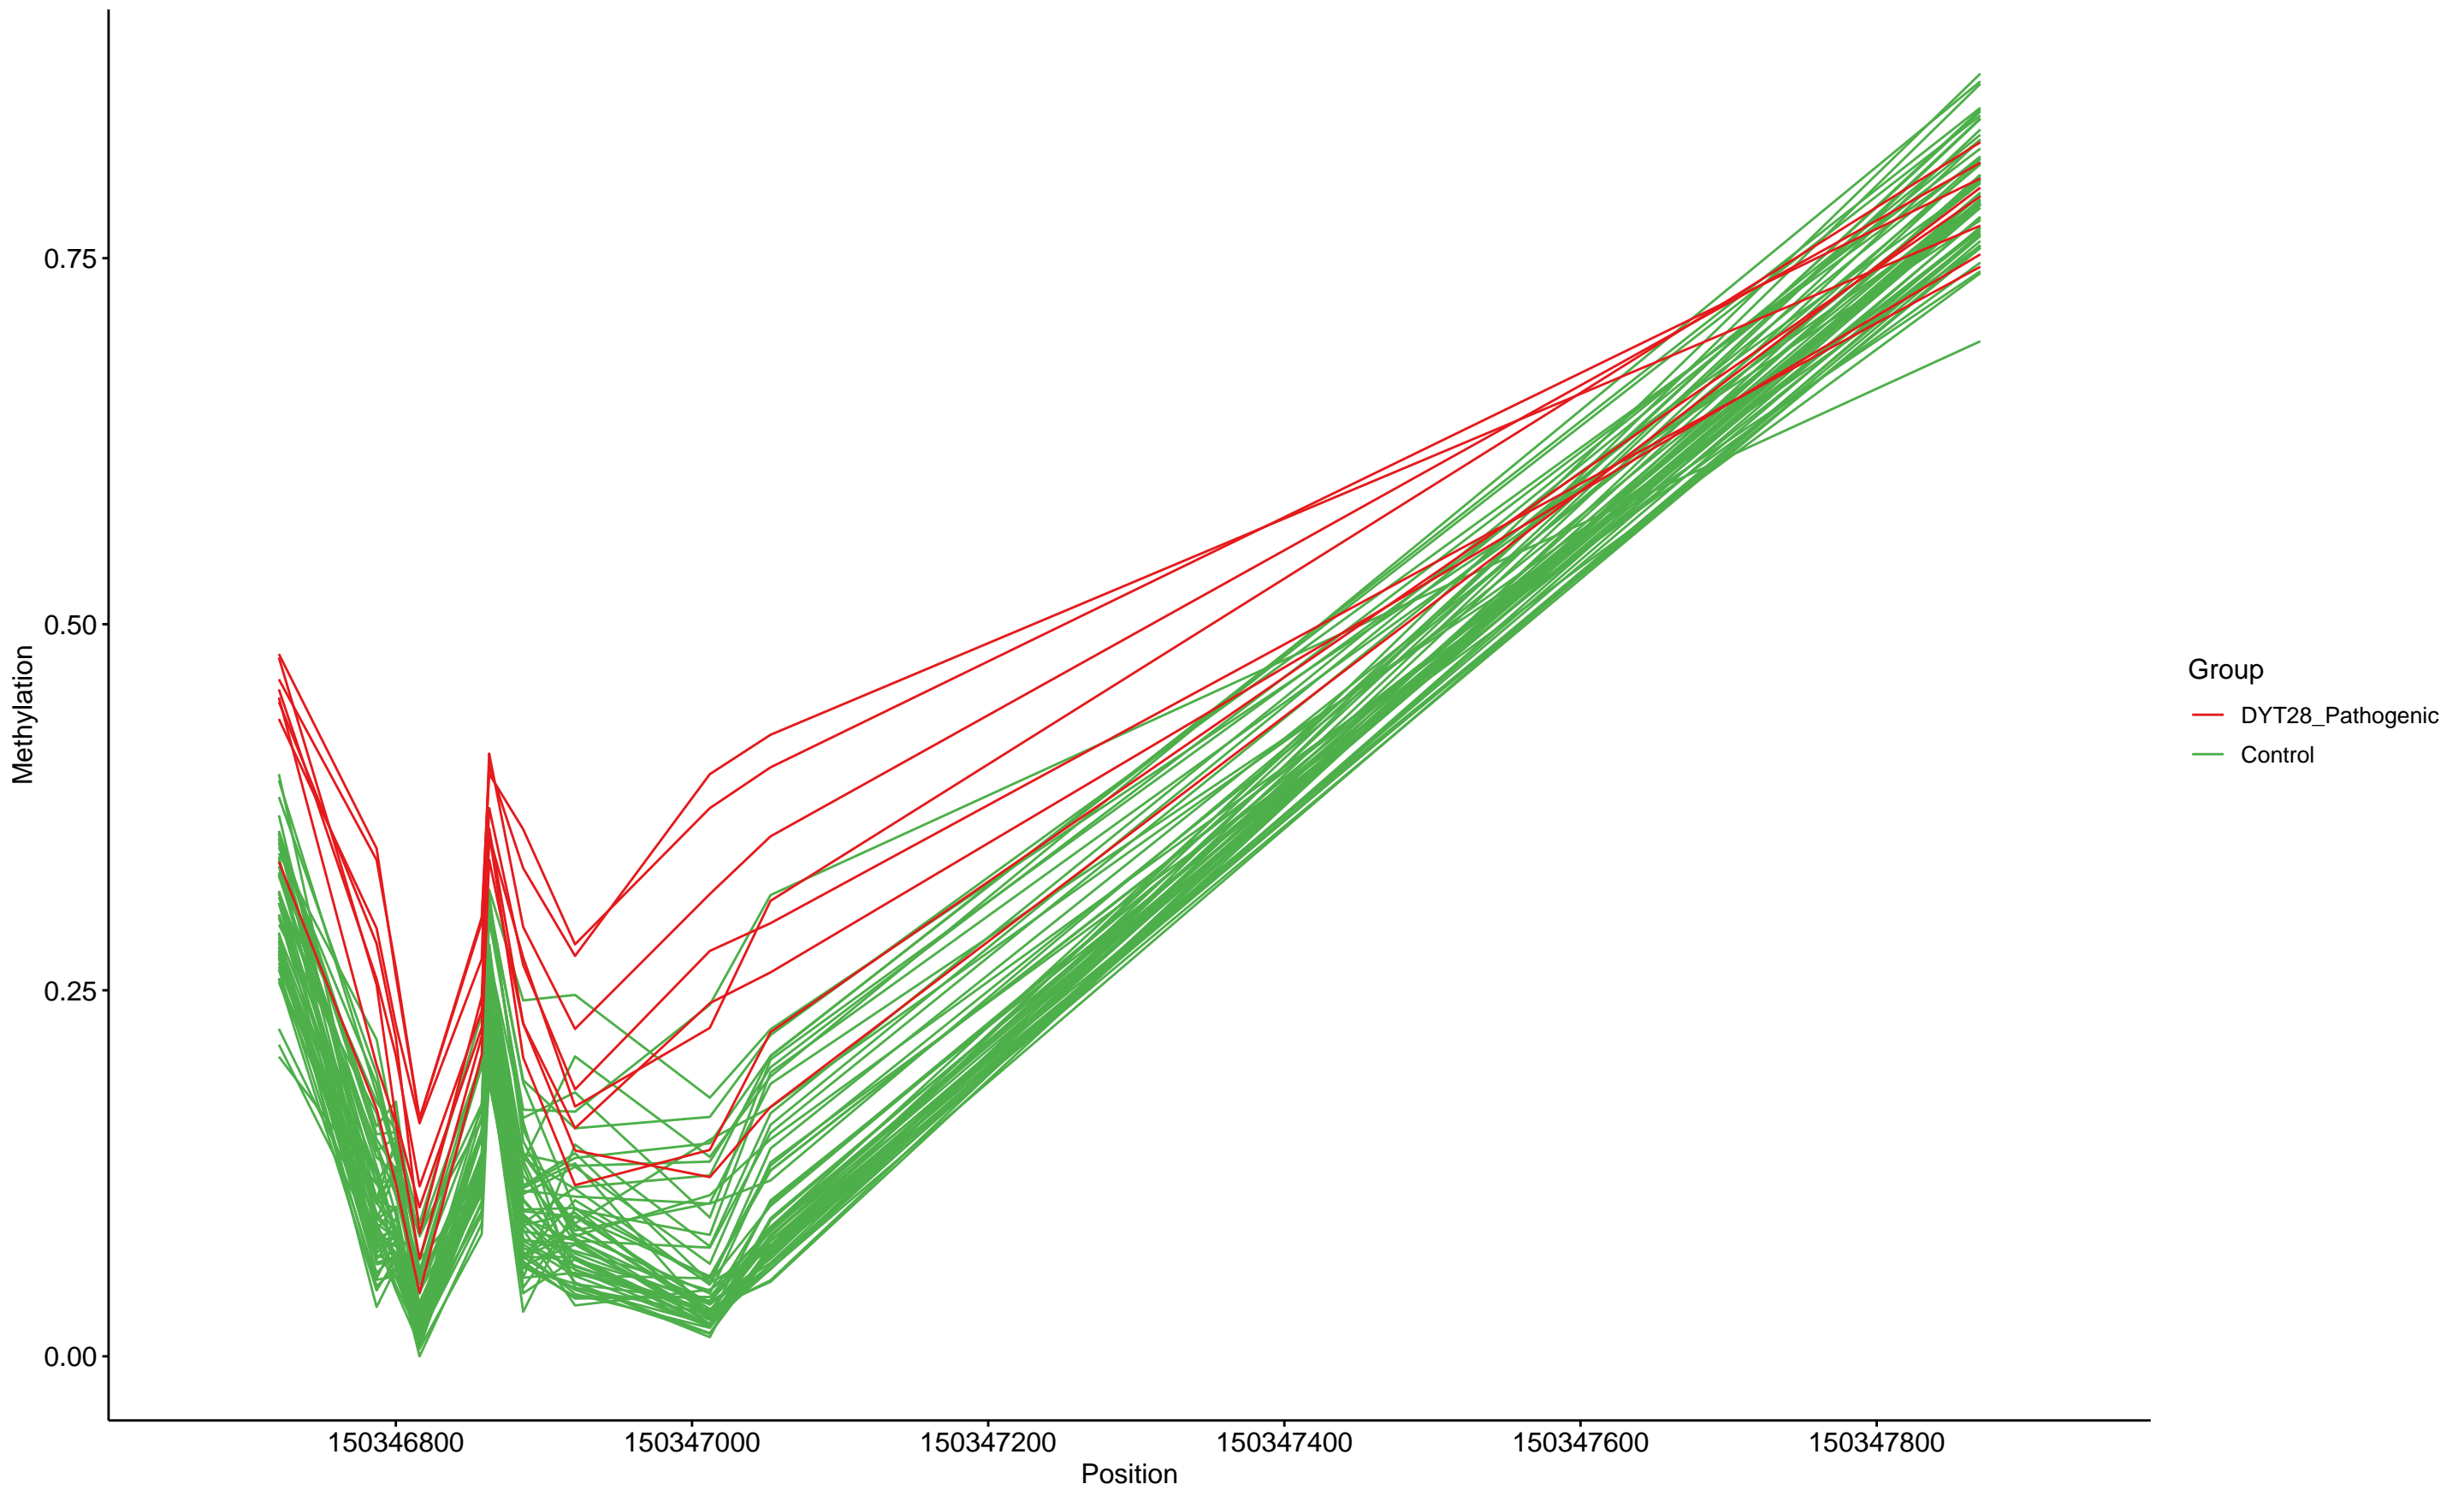



Region 41: chr16:3220475–3222180

Fisher: 1.13717261652551e-50

Stouffer: 2.08534414422522e-50

Mean difference: 0.101733524679955

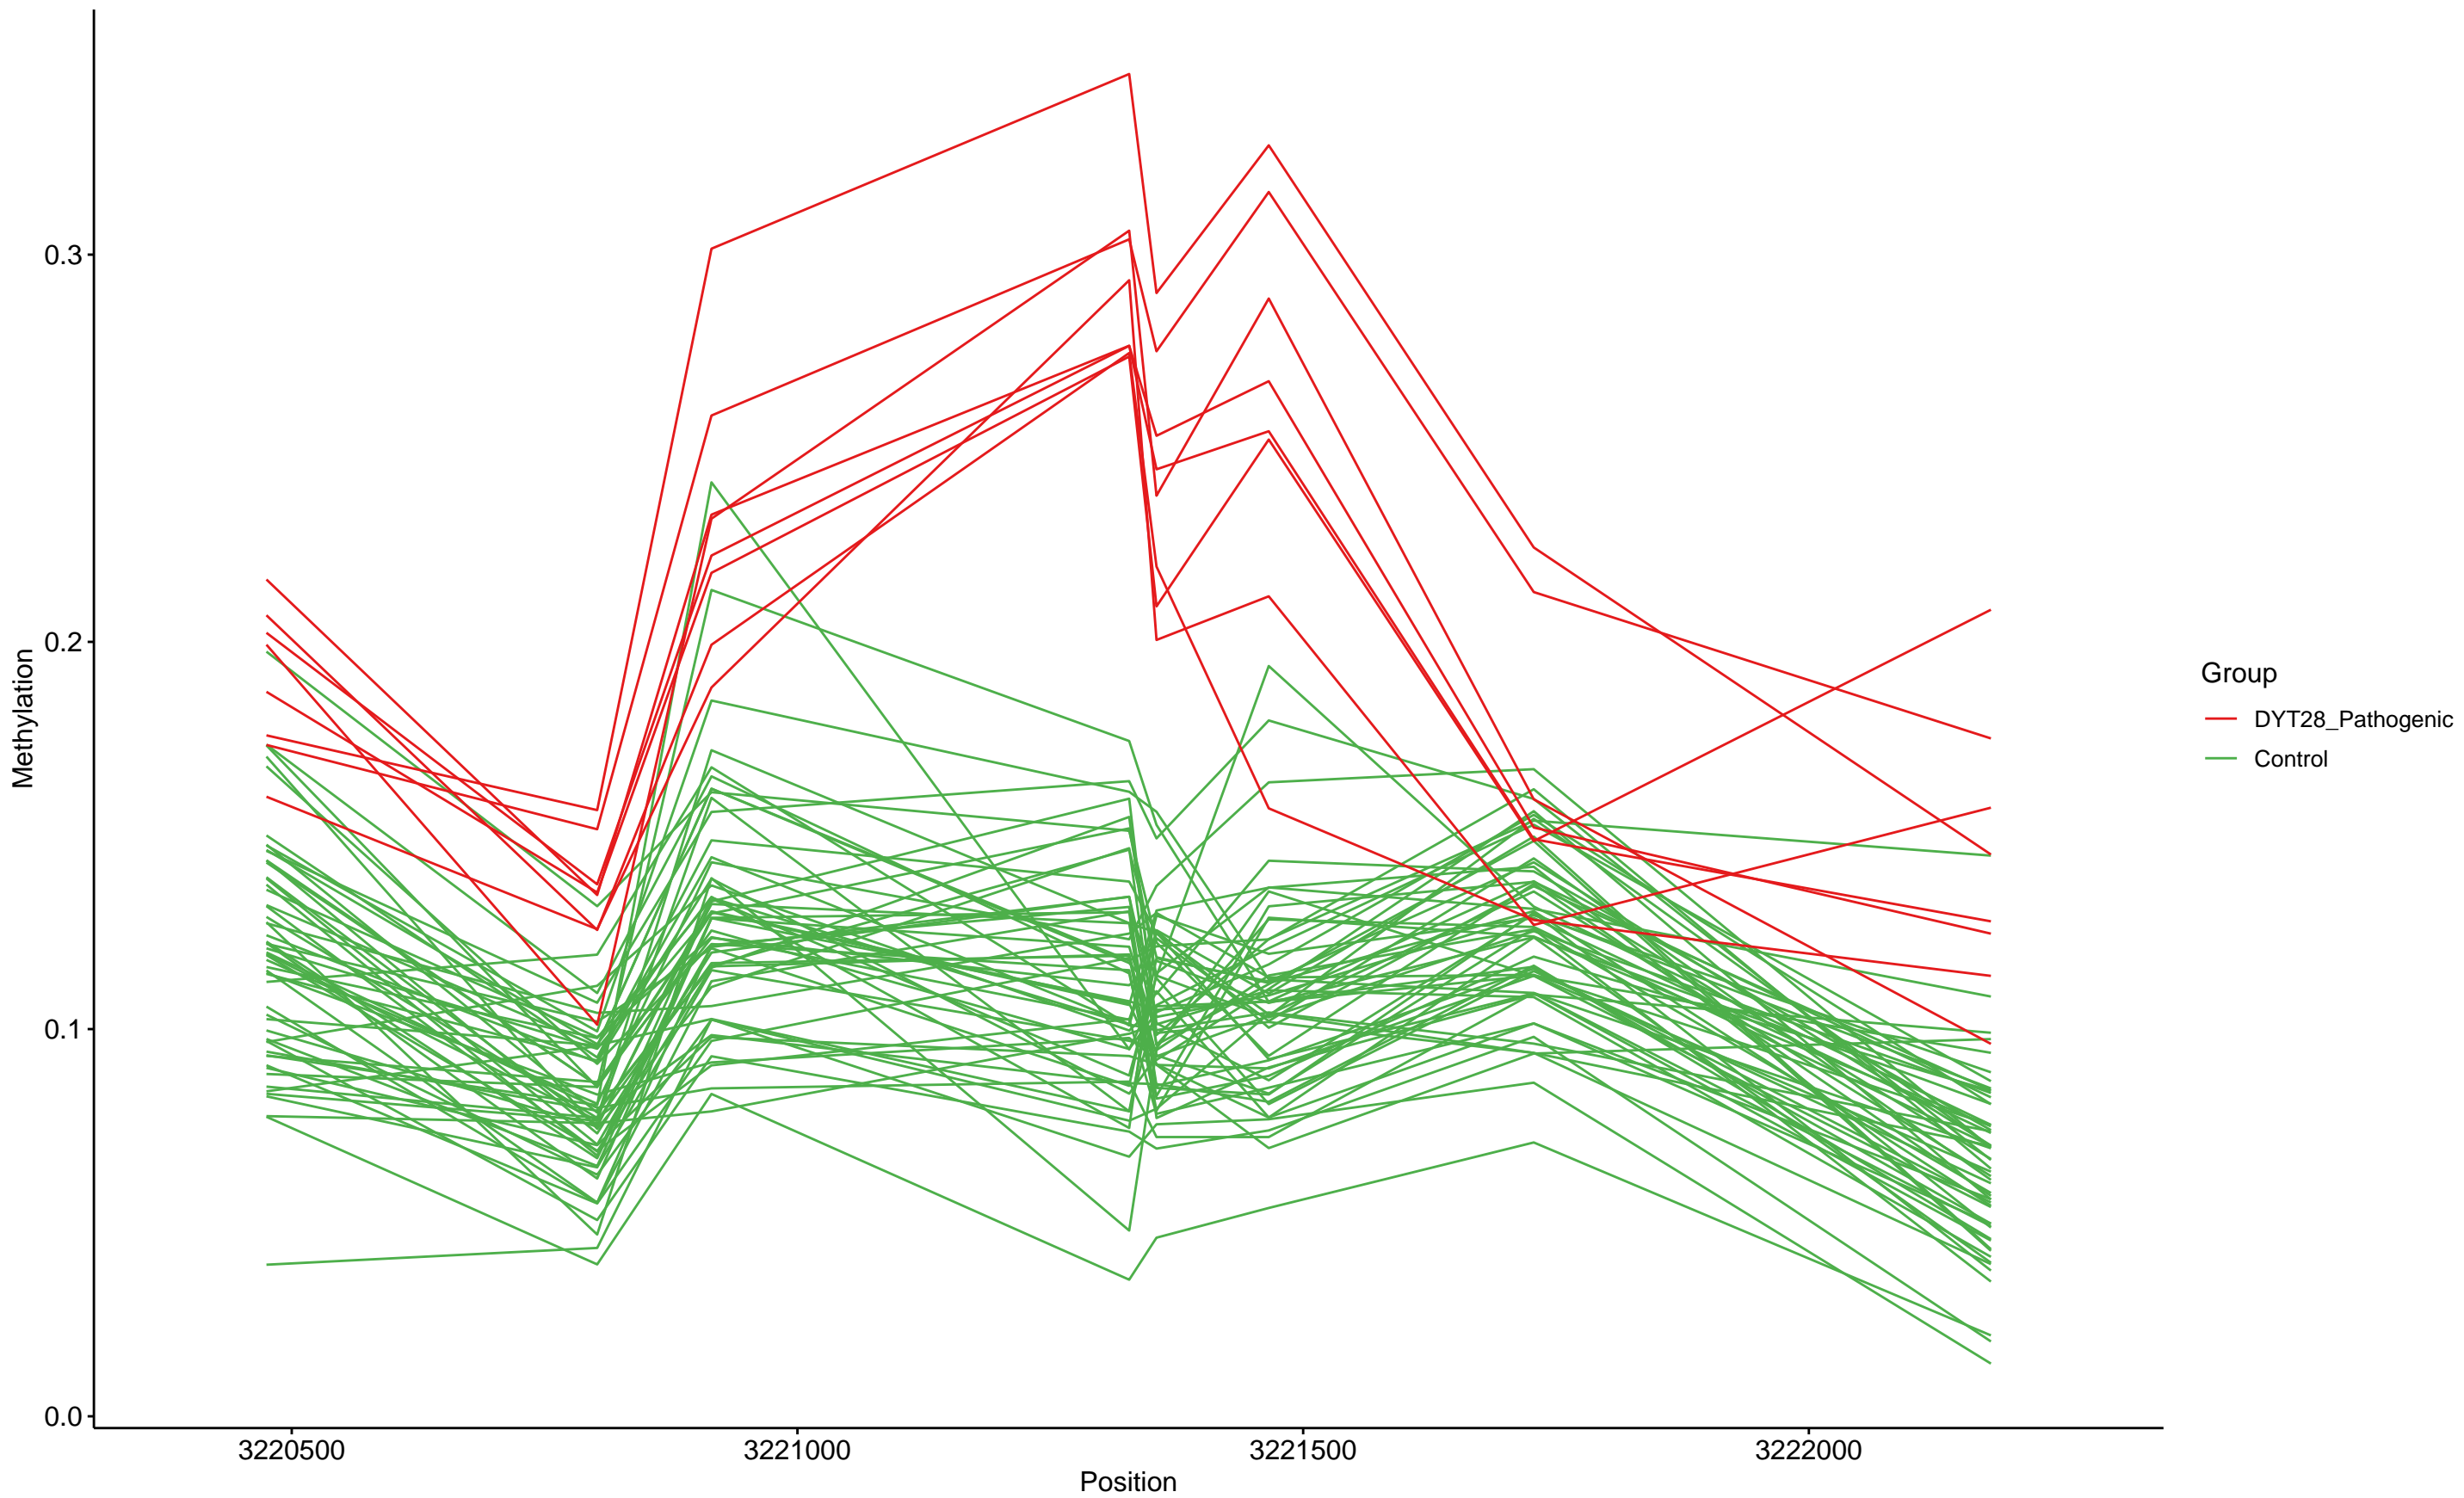

Region 42: chr6:26569014–26569596

Fisher: 1.48529923845625e-50

Stouffer: 4.27322155634641e-41

Mean difference: 0.124287166148522

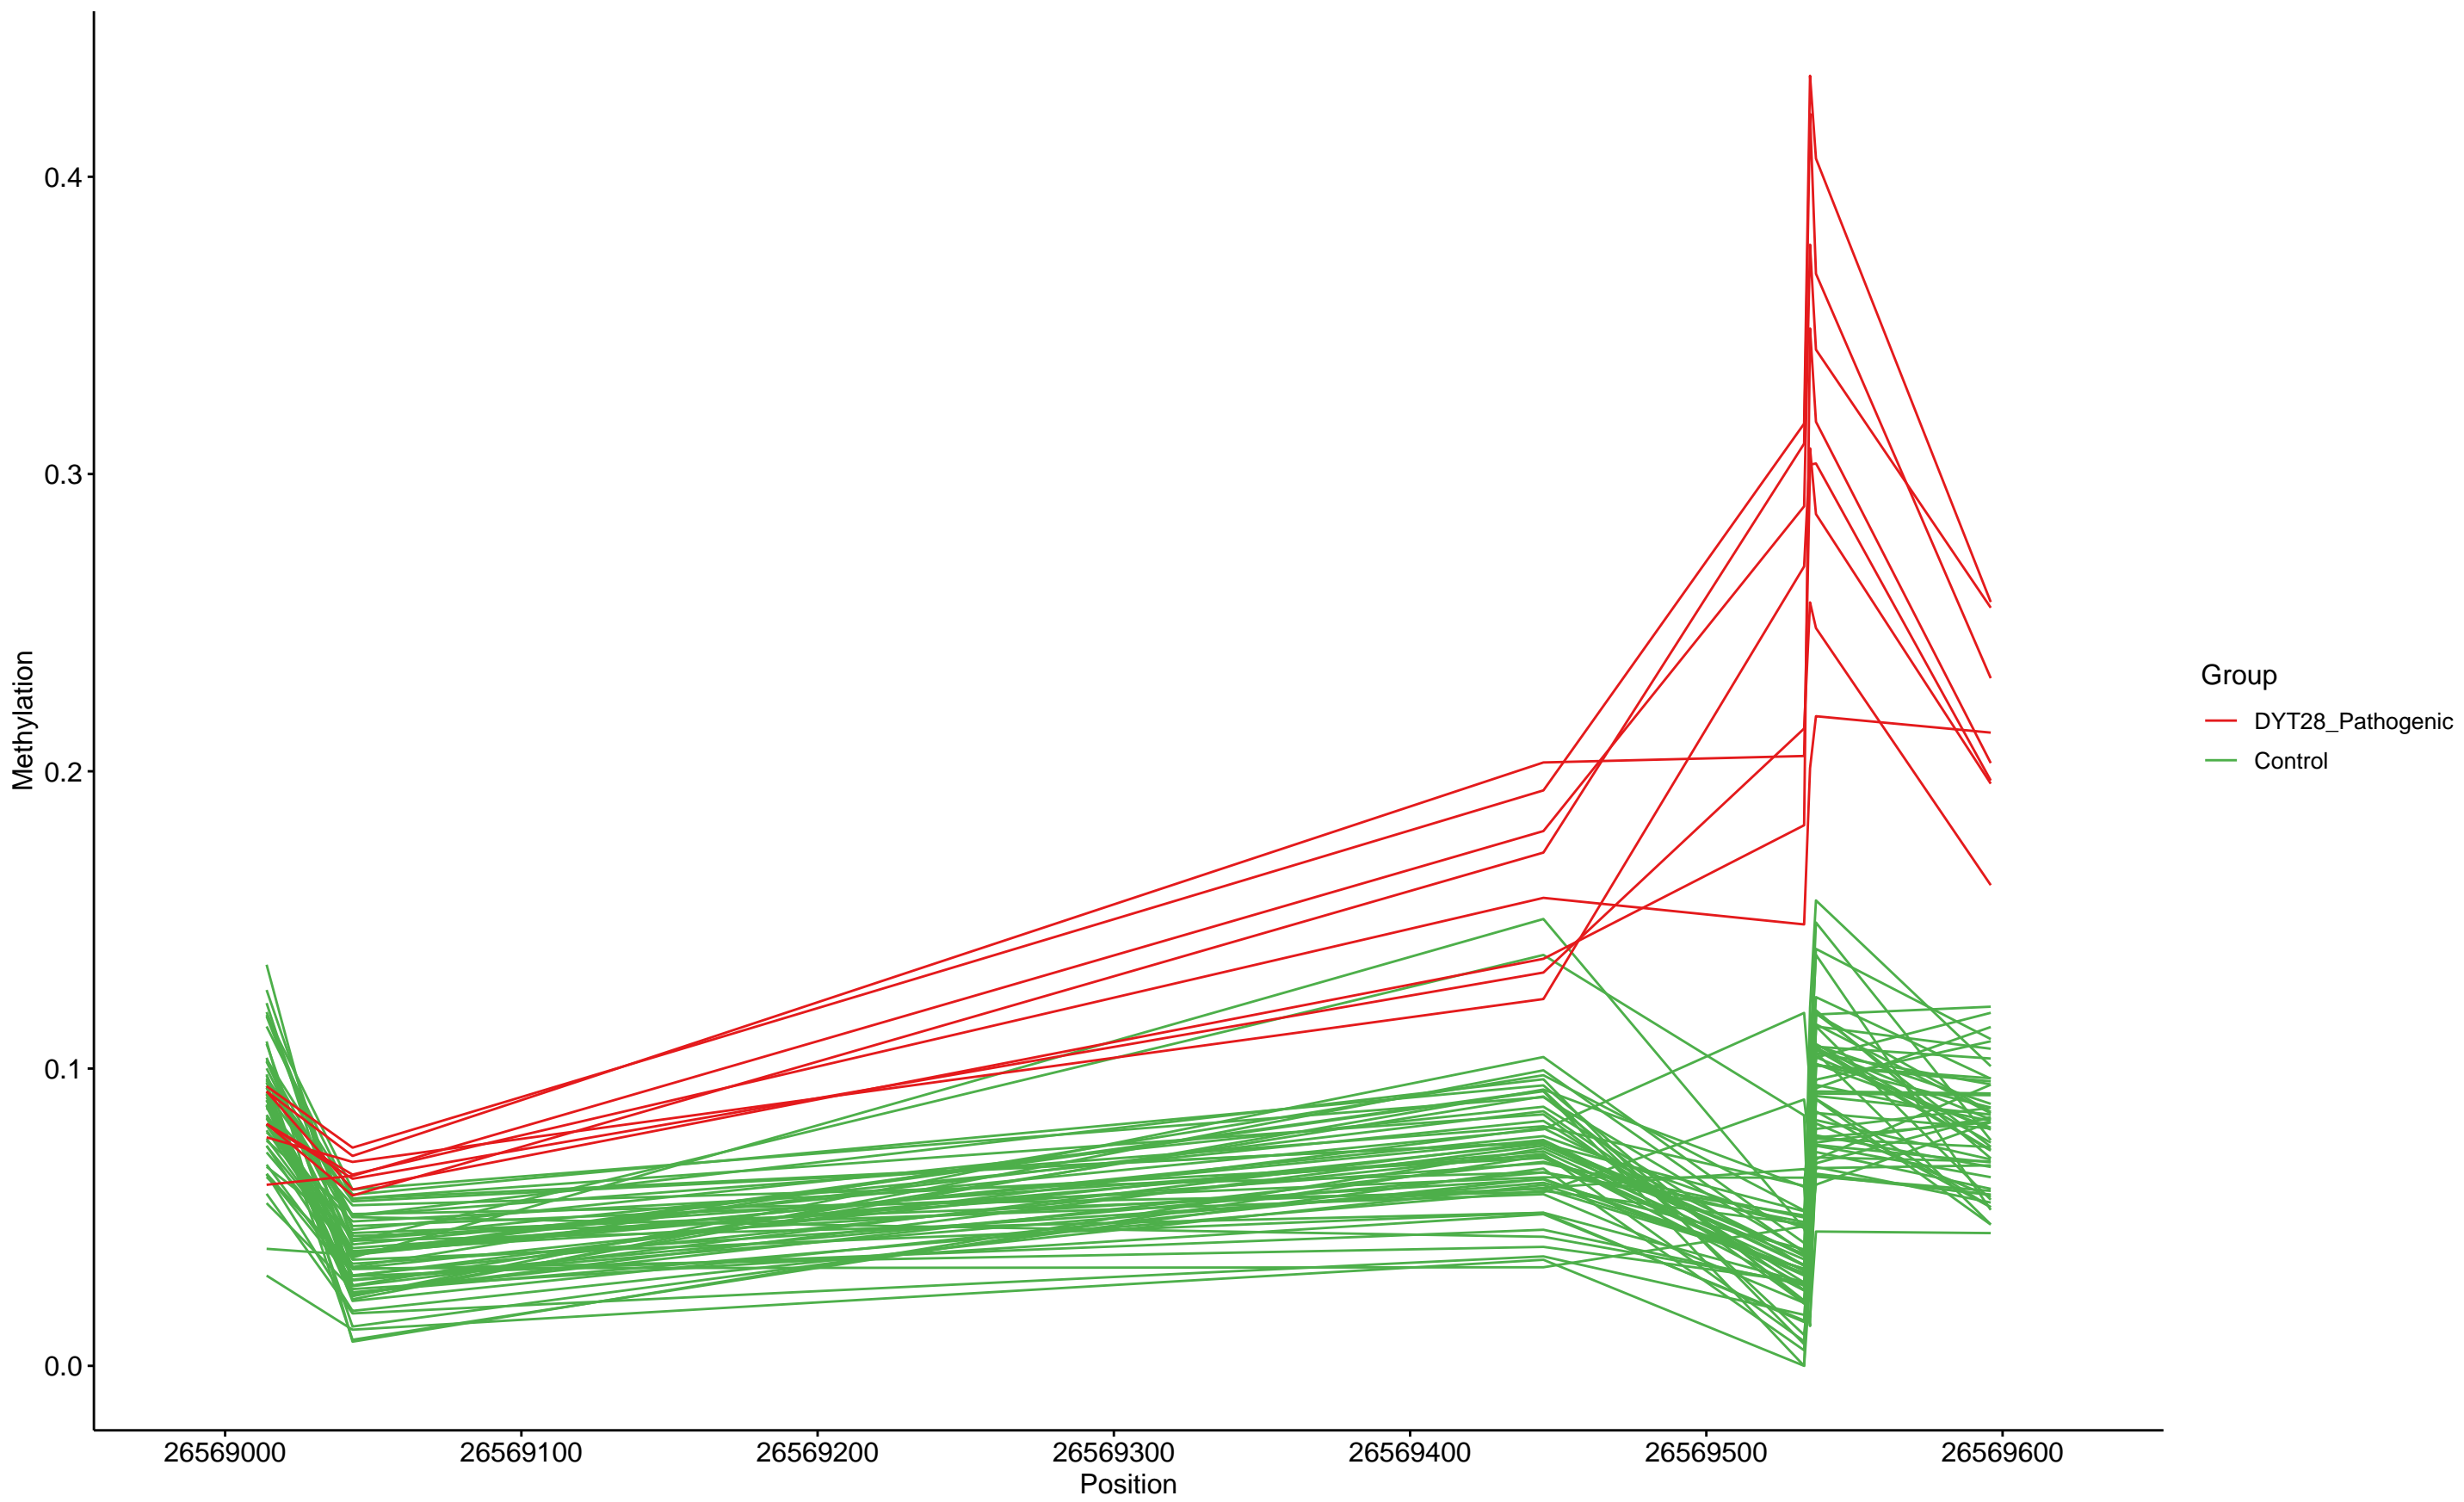

Region 43: chr6:28910953–28912166

Fisher:  $4.92718698711756e-50$

Stouffer:  $1.71925323219529e-53$

Mean difference: 0.12251715564422

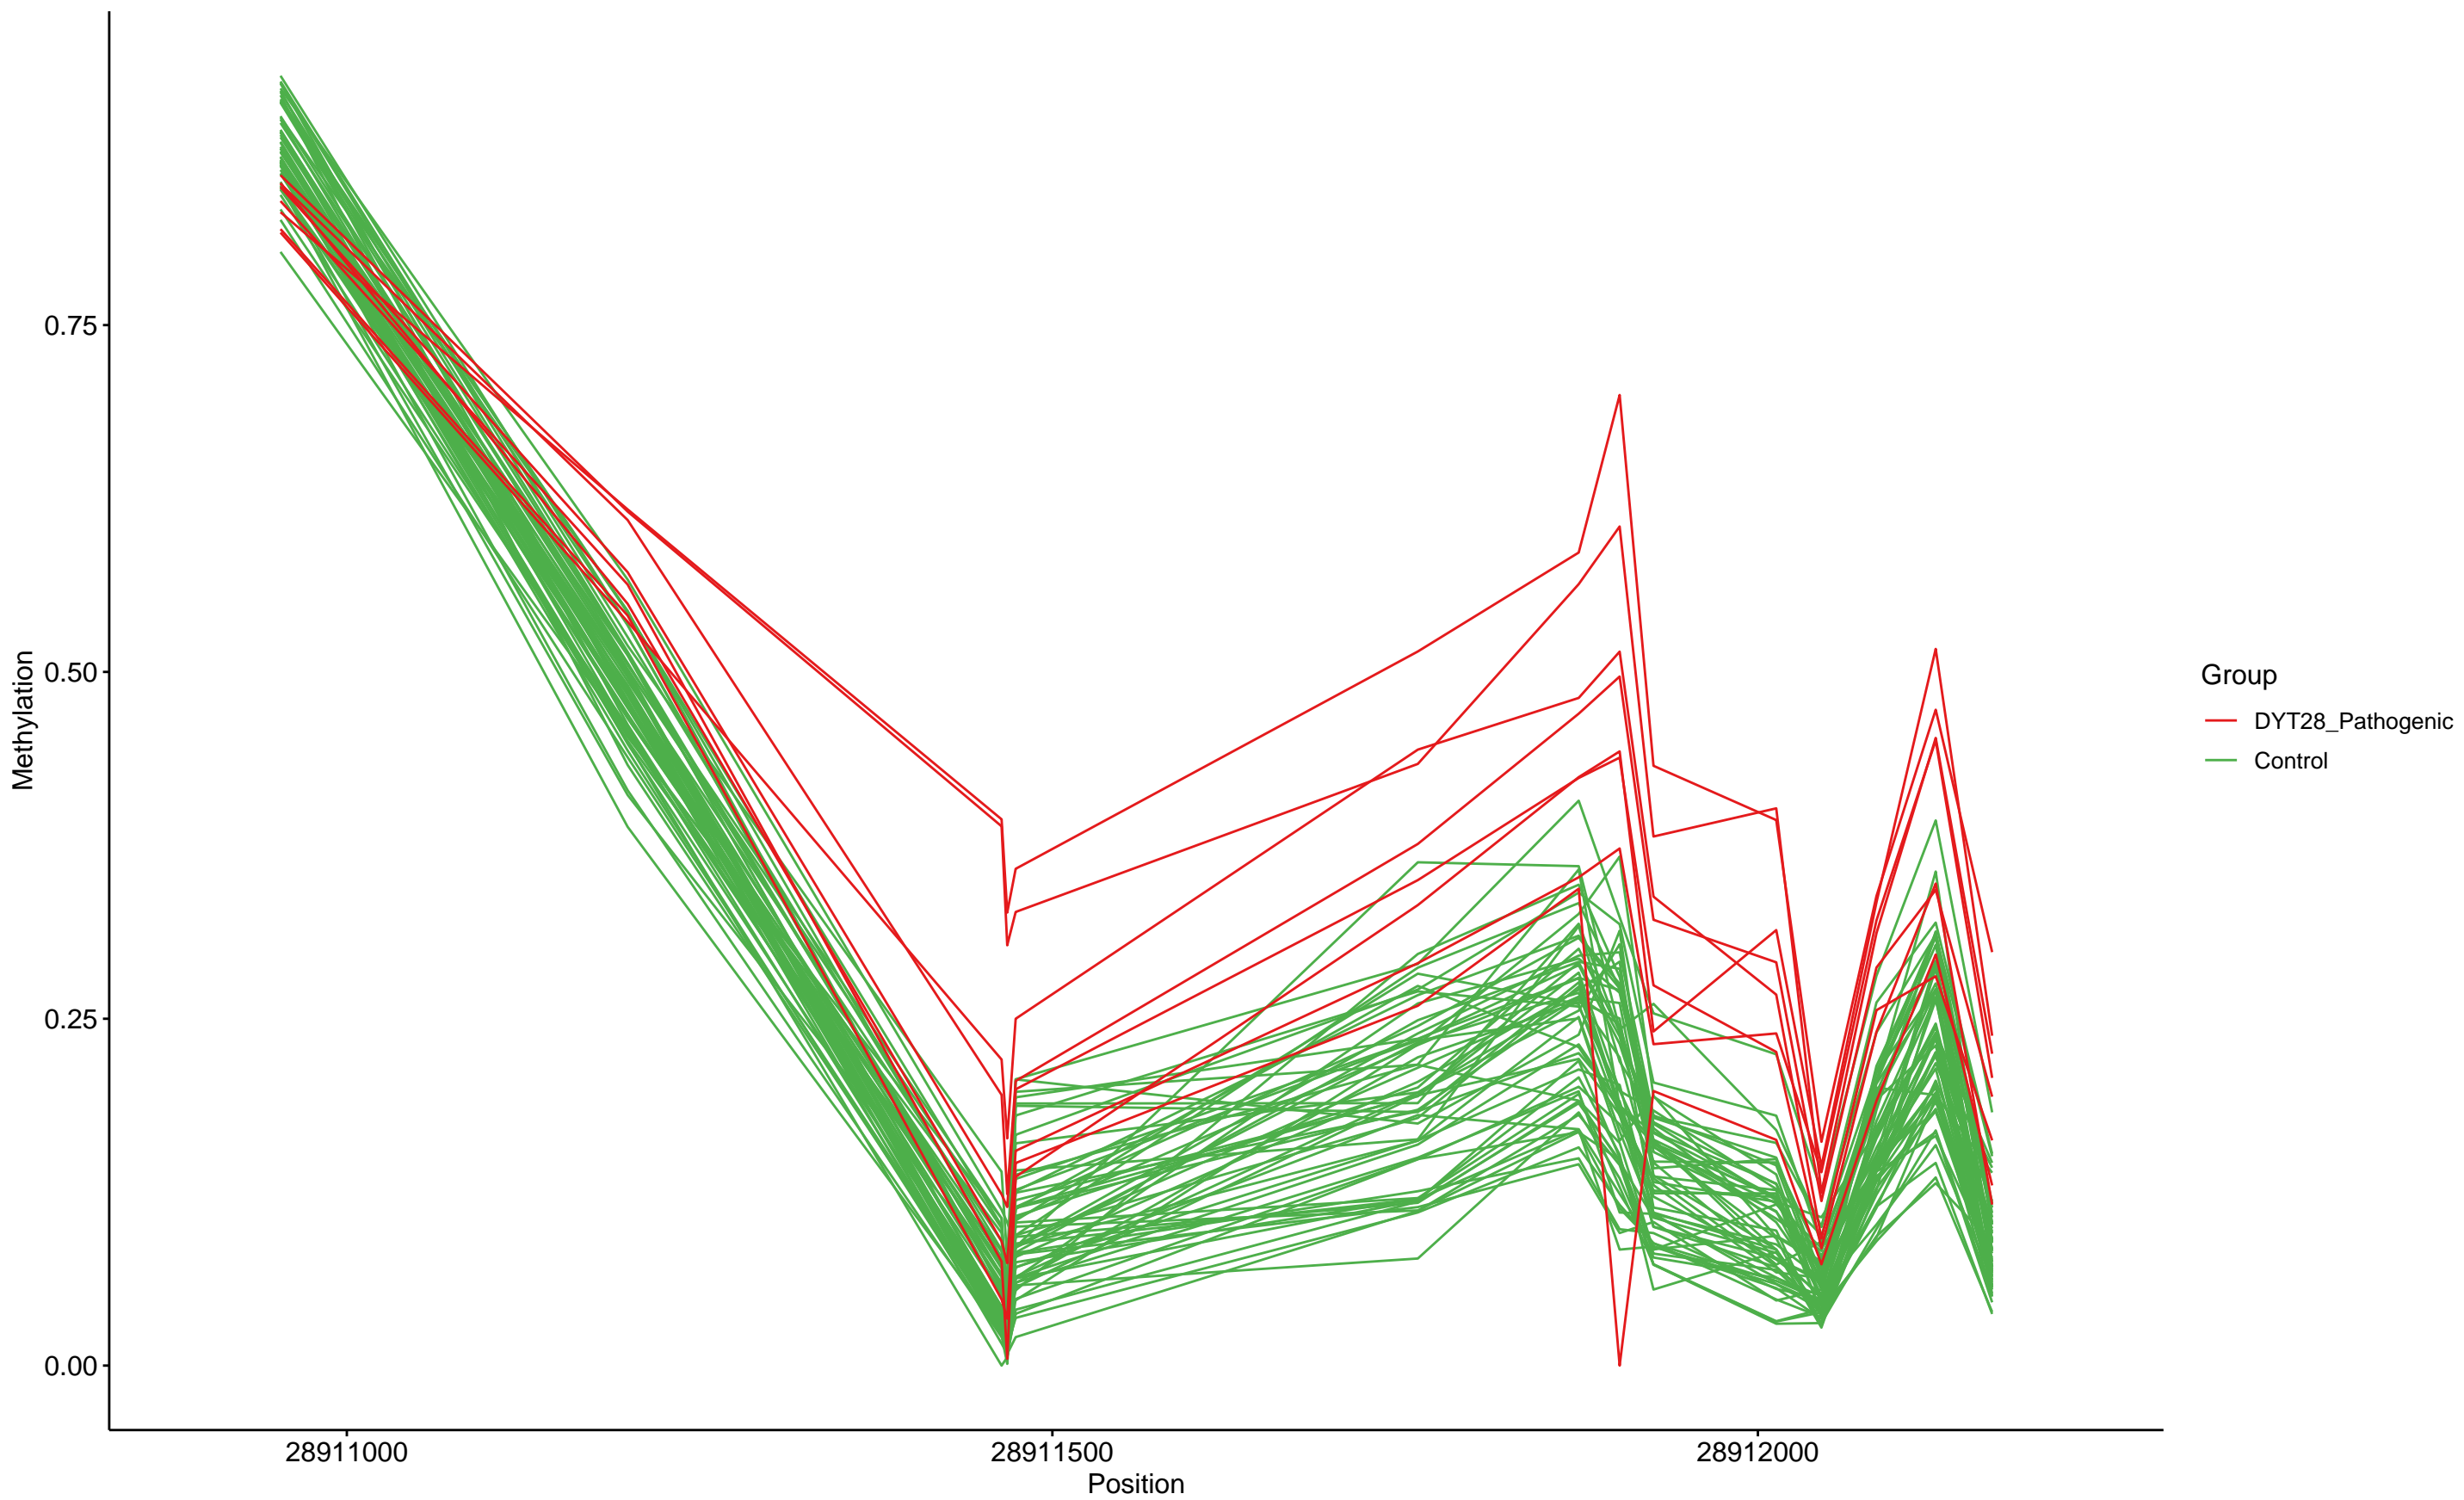

Region 44: chr1:16163479–16164122

Fisher: 2.25628516279096e-49

Stouffer: 7.06520310364333e-52

Mean difference: 0.215575694289693

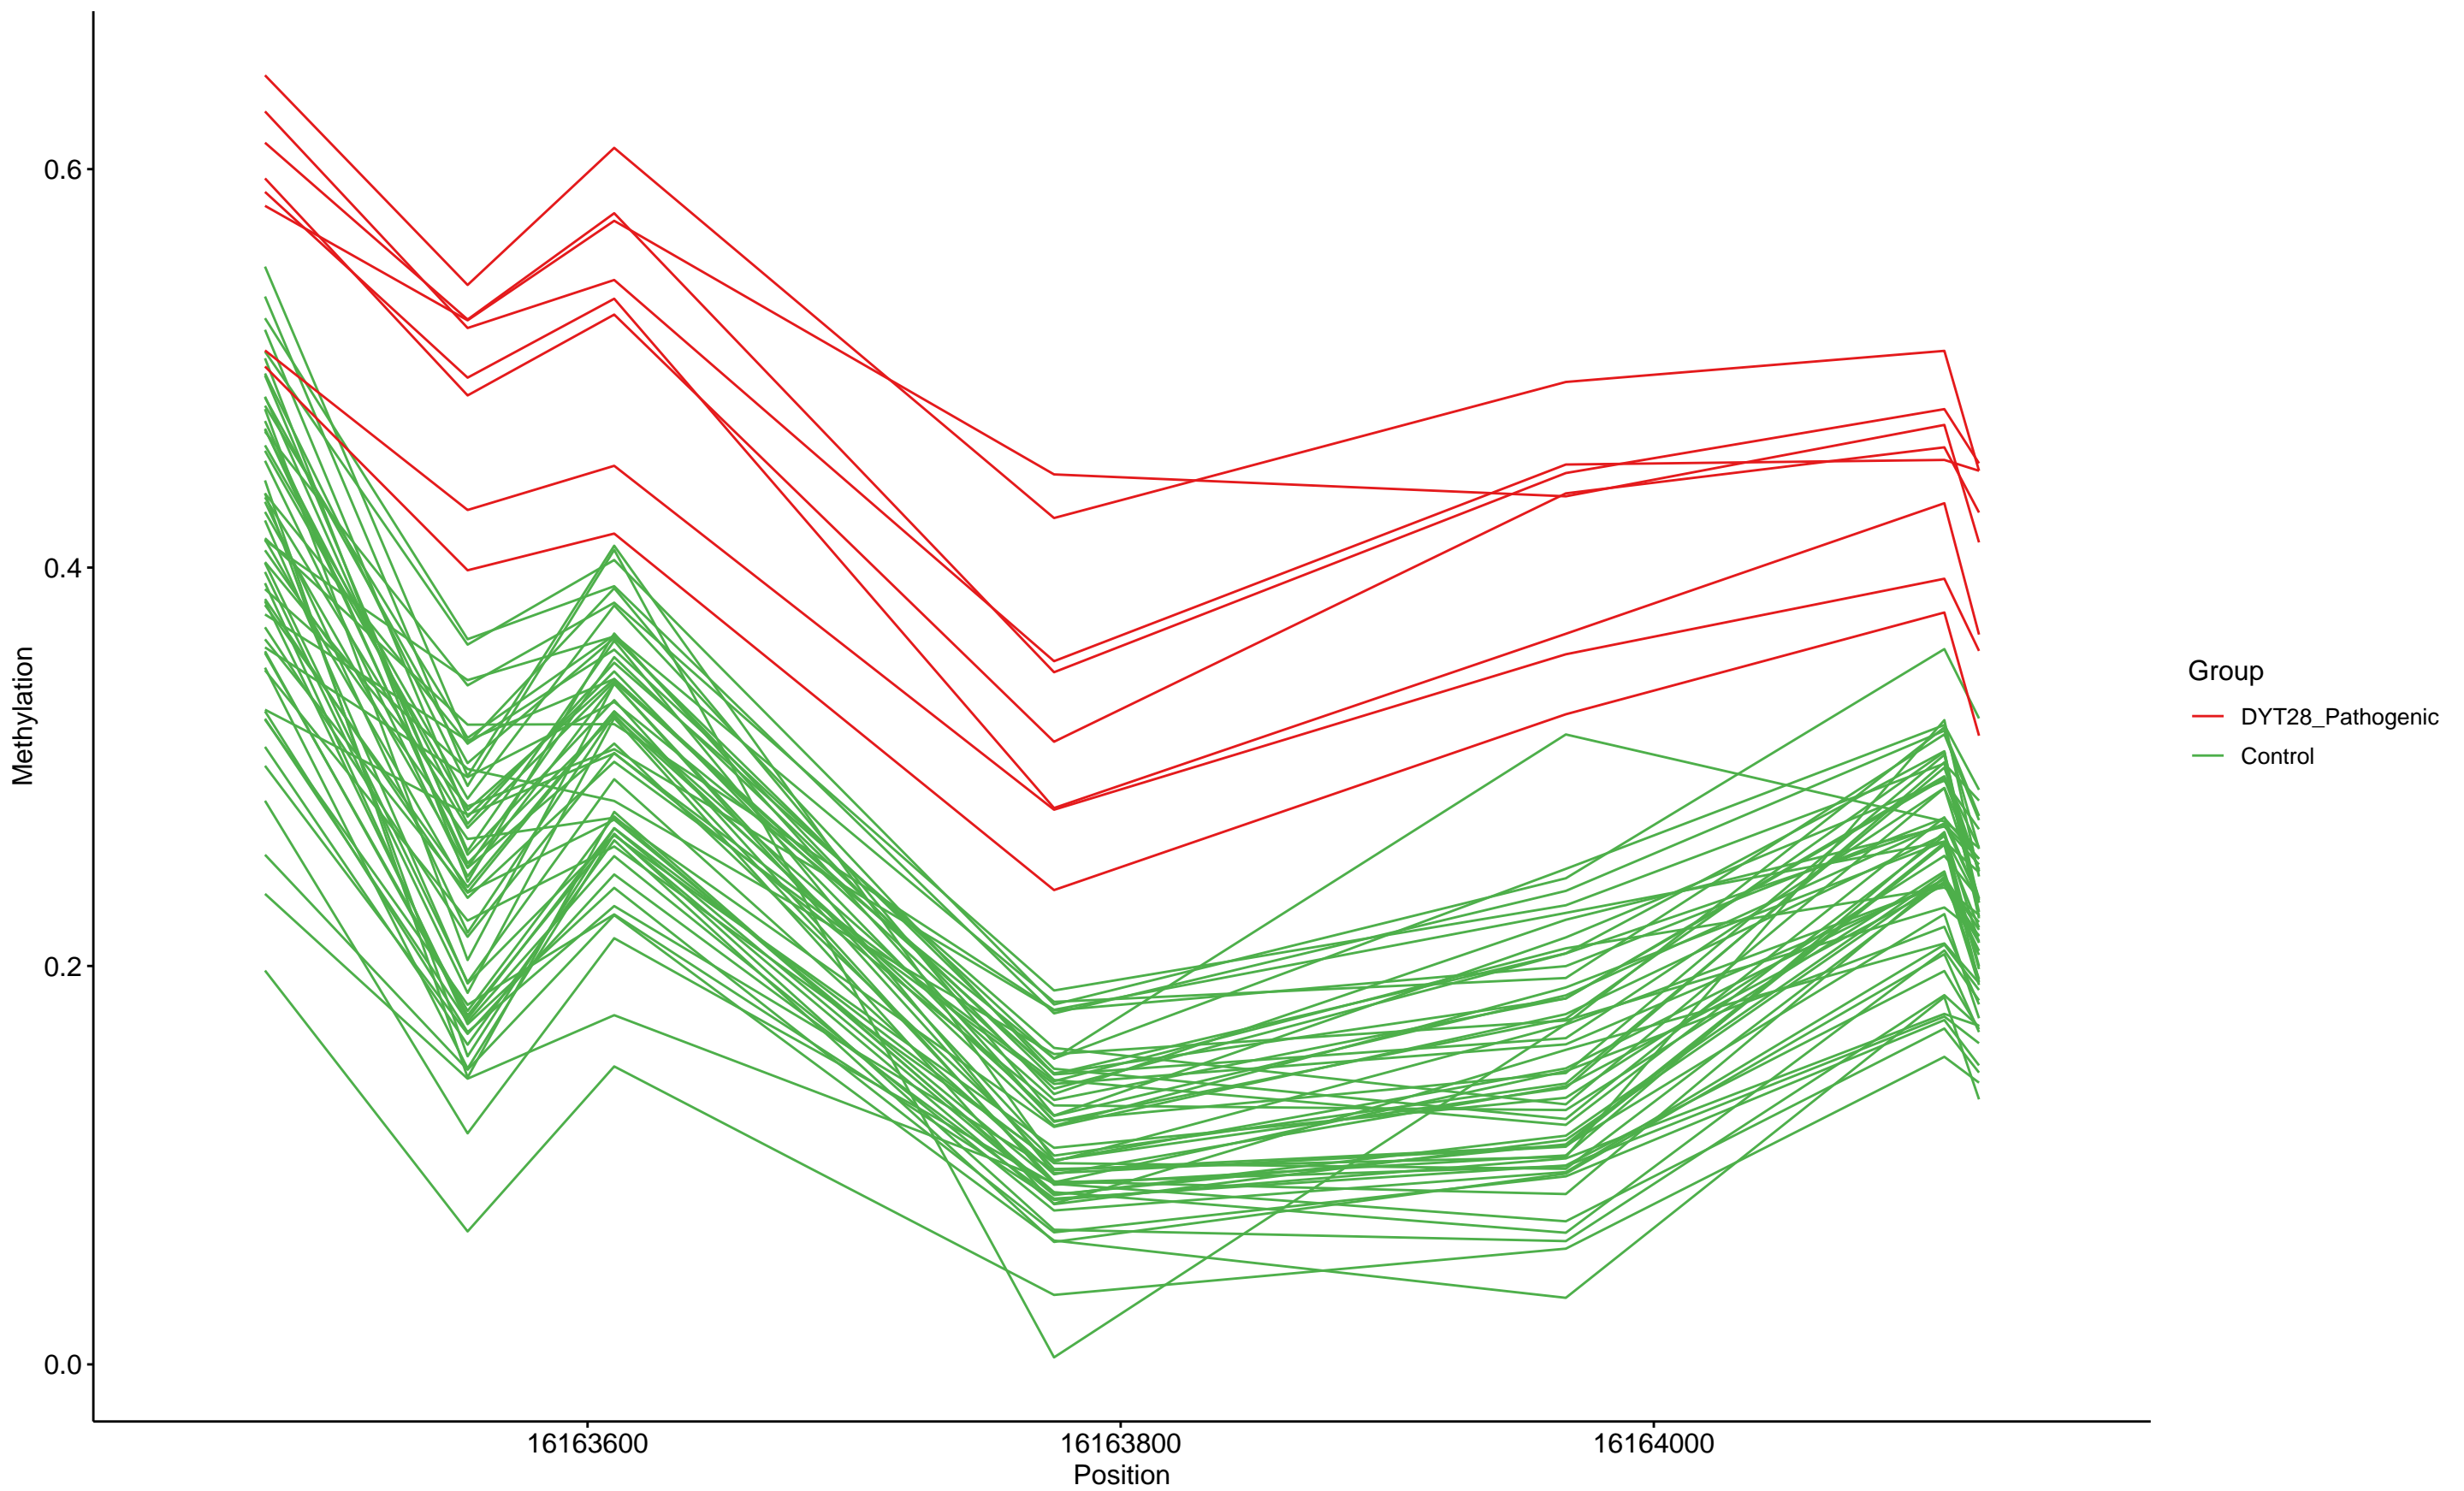



Region 45: chr20:58508123–58509559

Fisher: 1.35019670737738e-48

Stouffer: 5.27796639405131e-45

Mean difference: 0.102305729816742

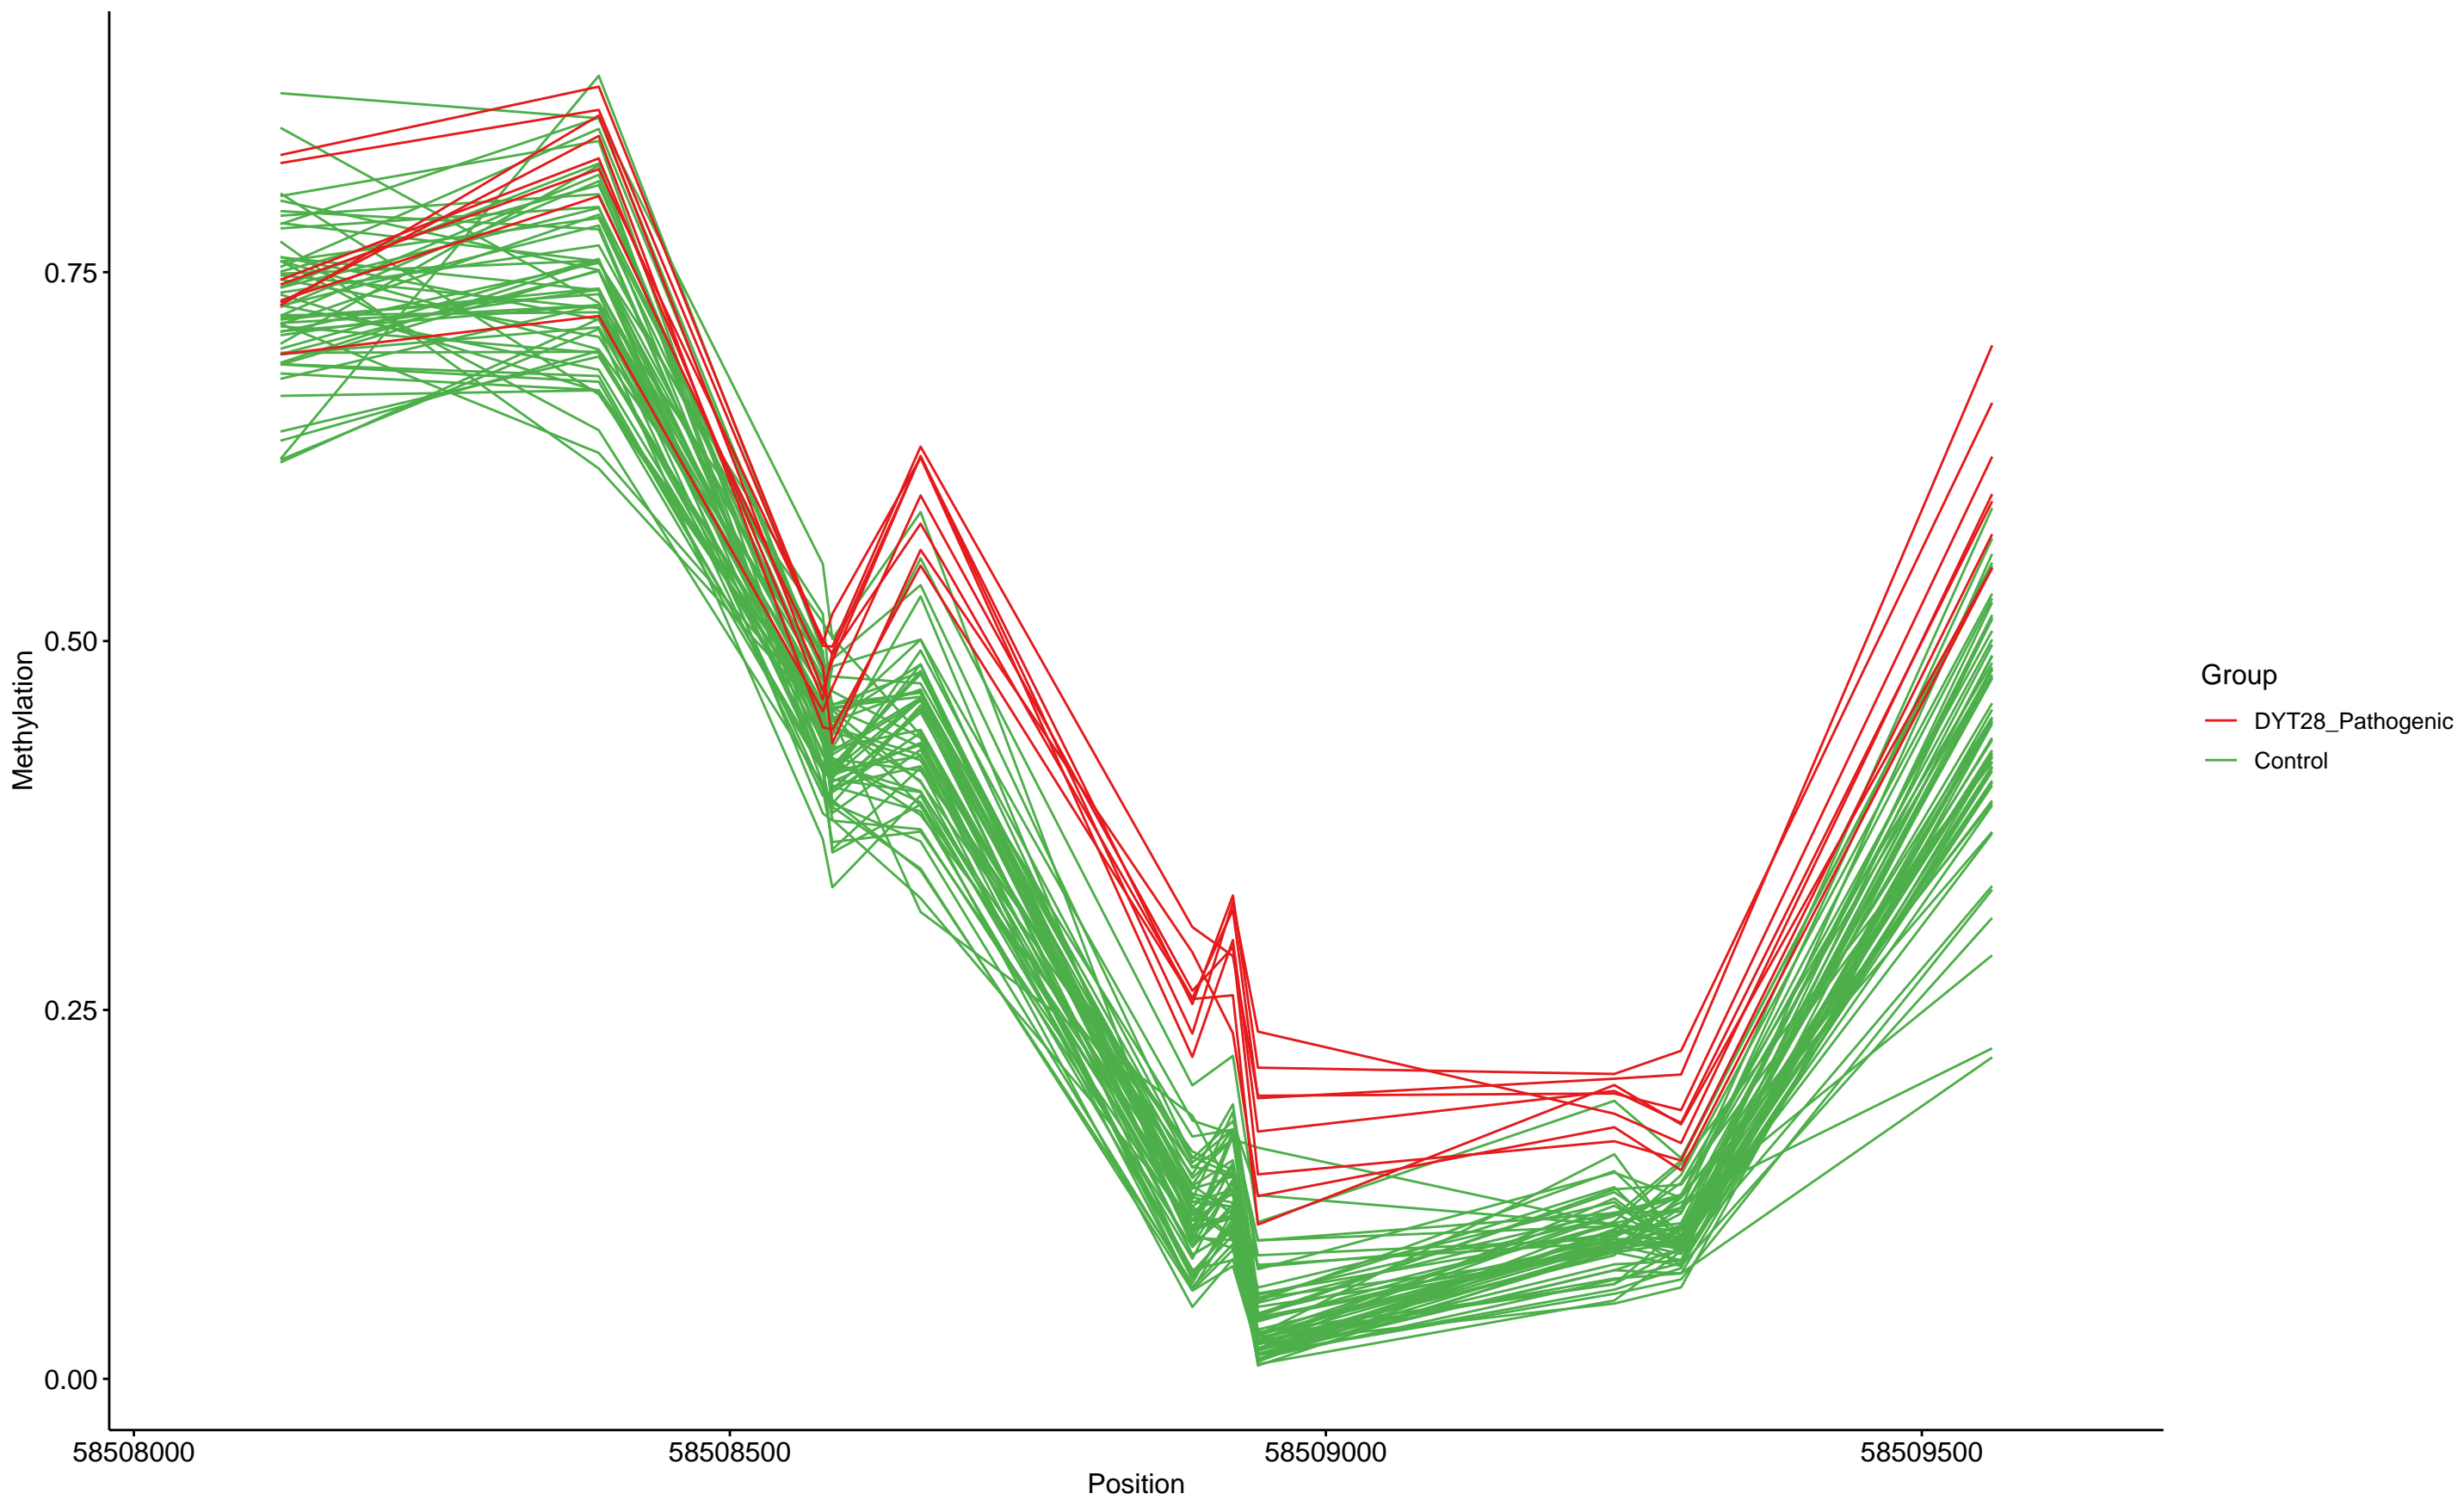

Region 46: chr7:143582146–143583199

Fisher: 4.91265302937261e-48

Stouffer: 8.50866813084876e-40

Mean difference: 0.140515528397488

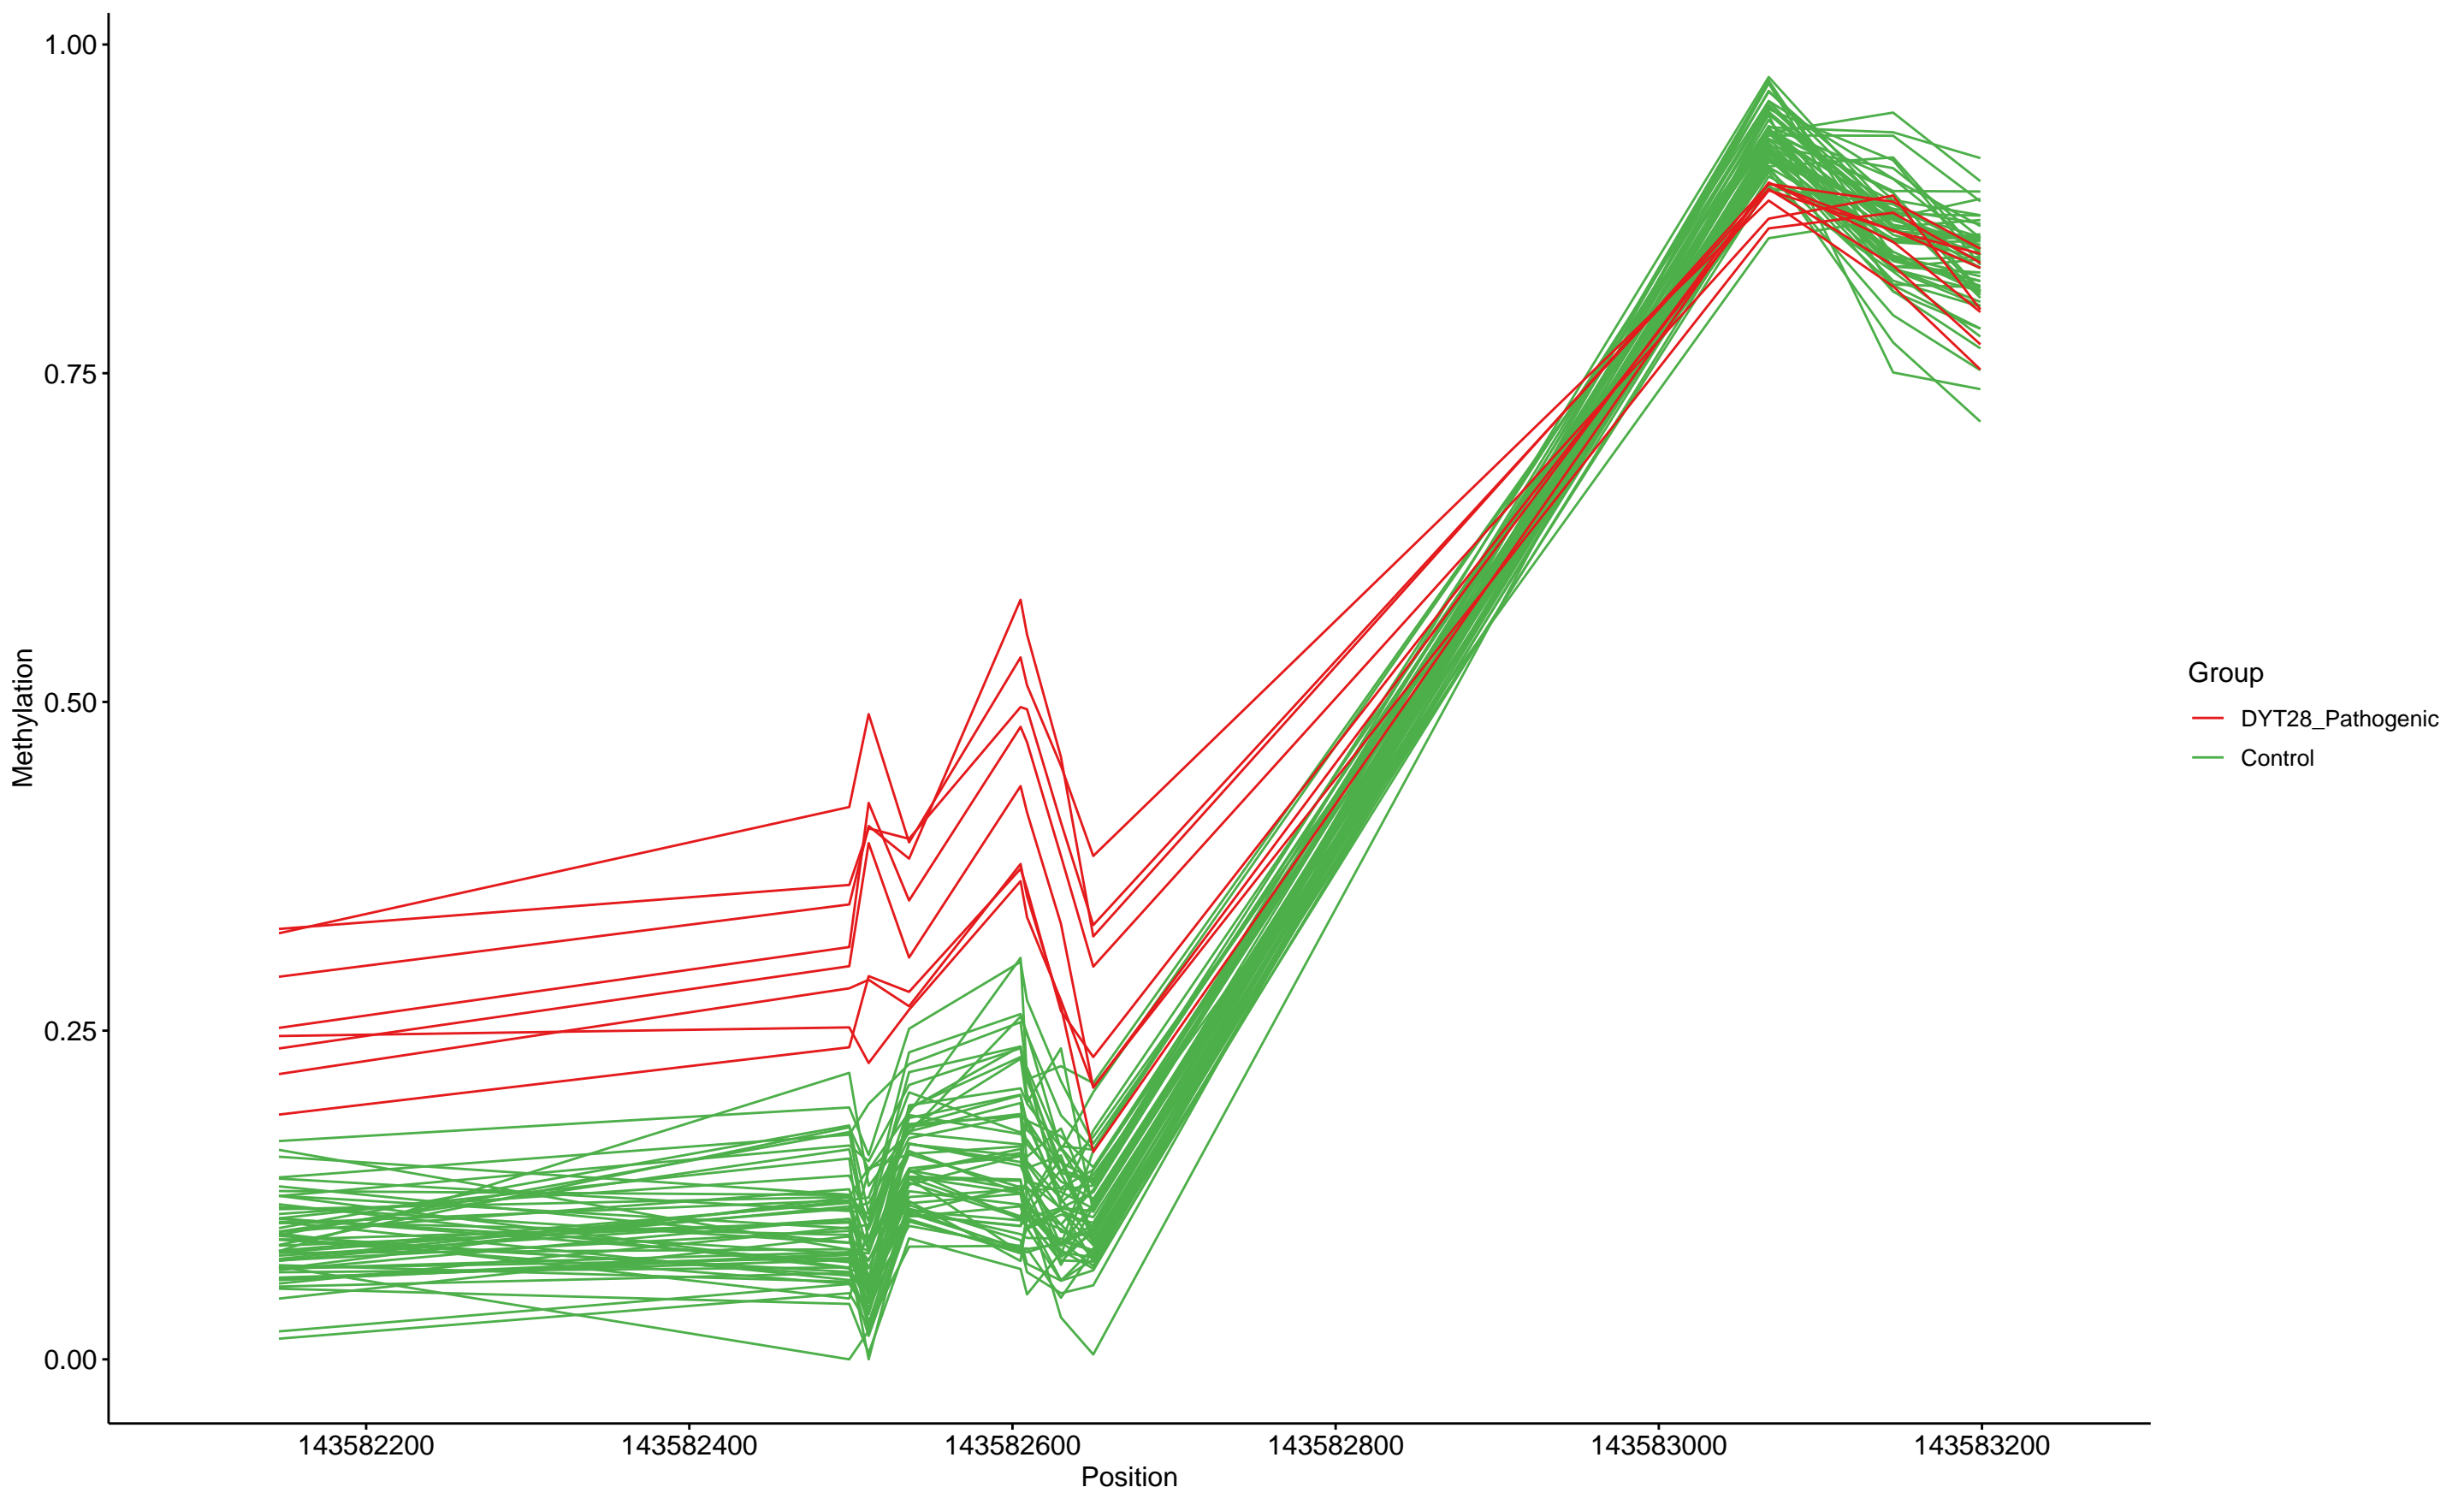

Region 47: chr7:55516267-55517538

Fisher: 6.61268622384679e-48

Stouffer: 1.00917209644072e-46

Mean difference: 0.138968096354408

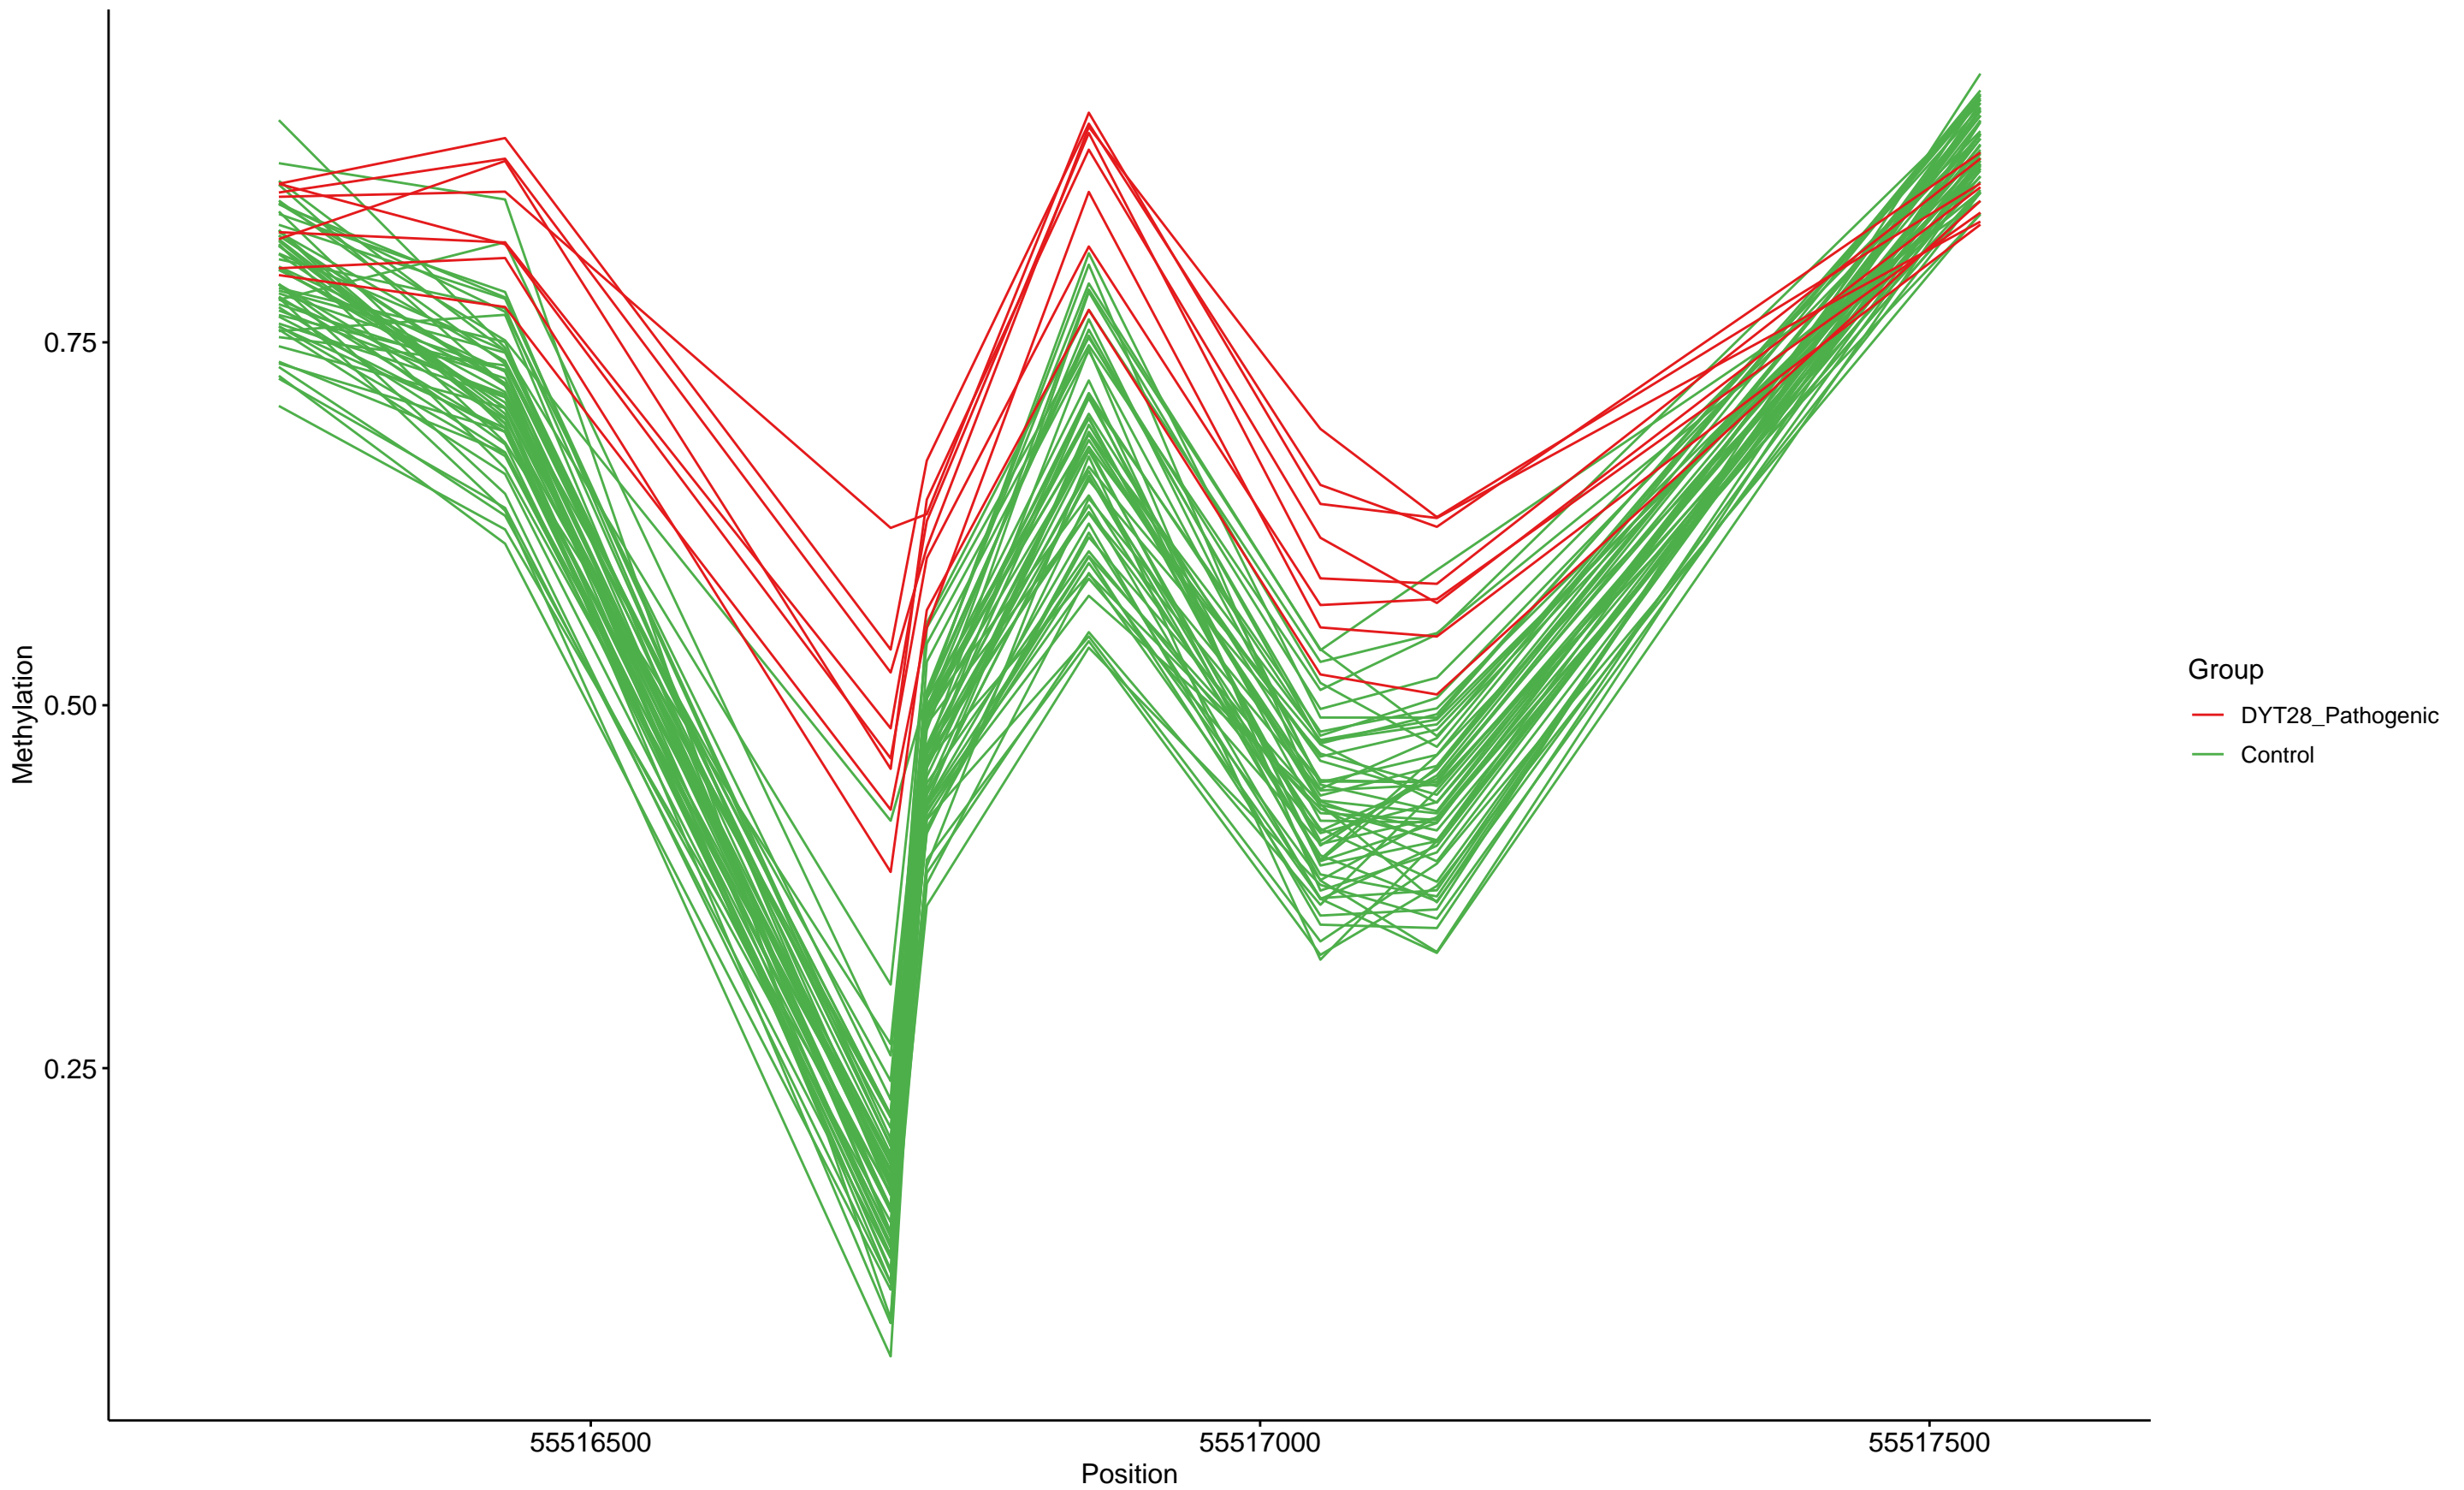

Region 48: chr17:43220288–43222258

Fisher: 1.22590246062165e-47

Stouffer: 1.91689433204529e-48

Mean difference: 0.124718795755401

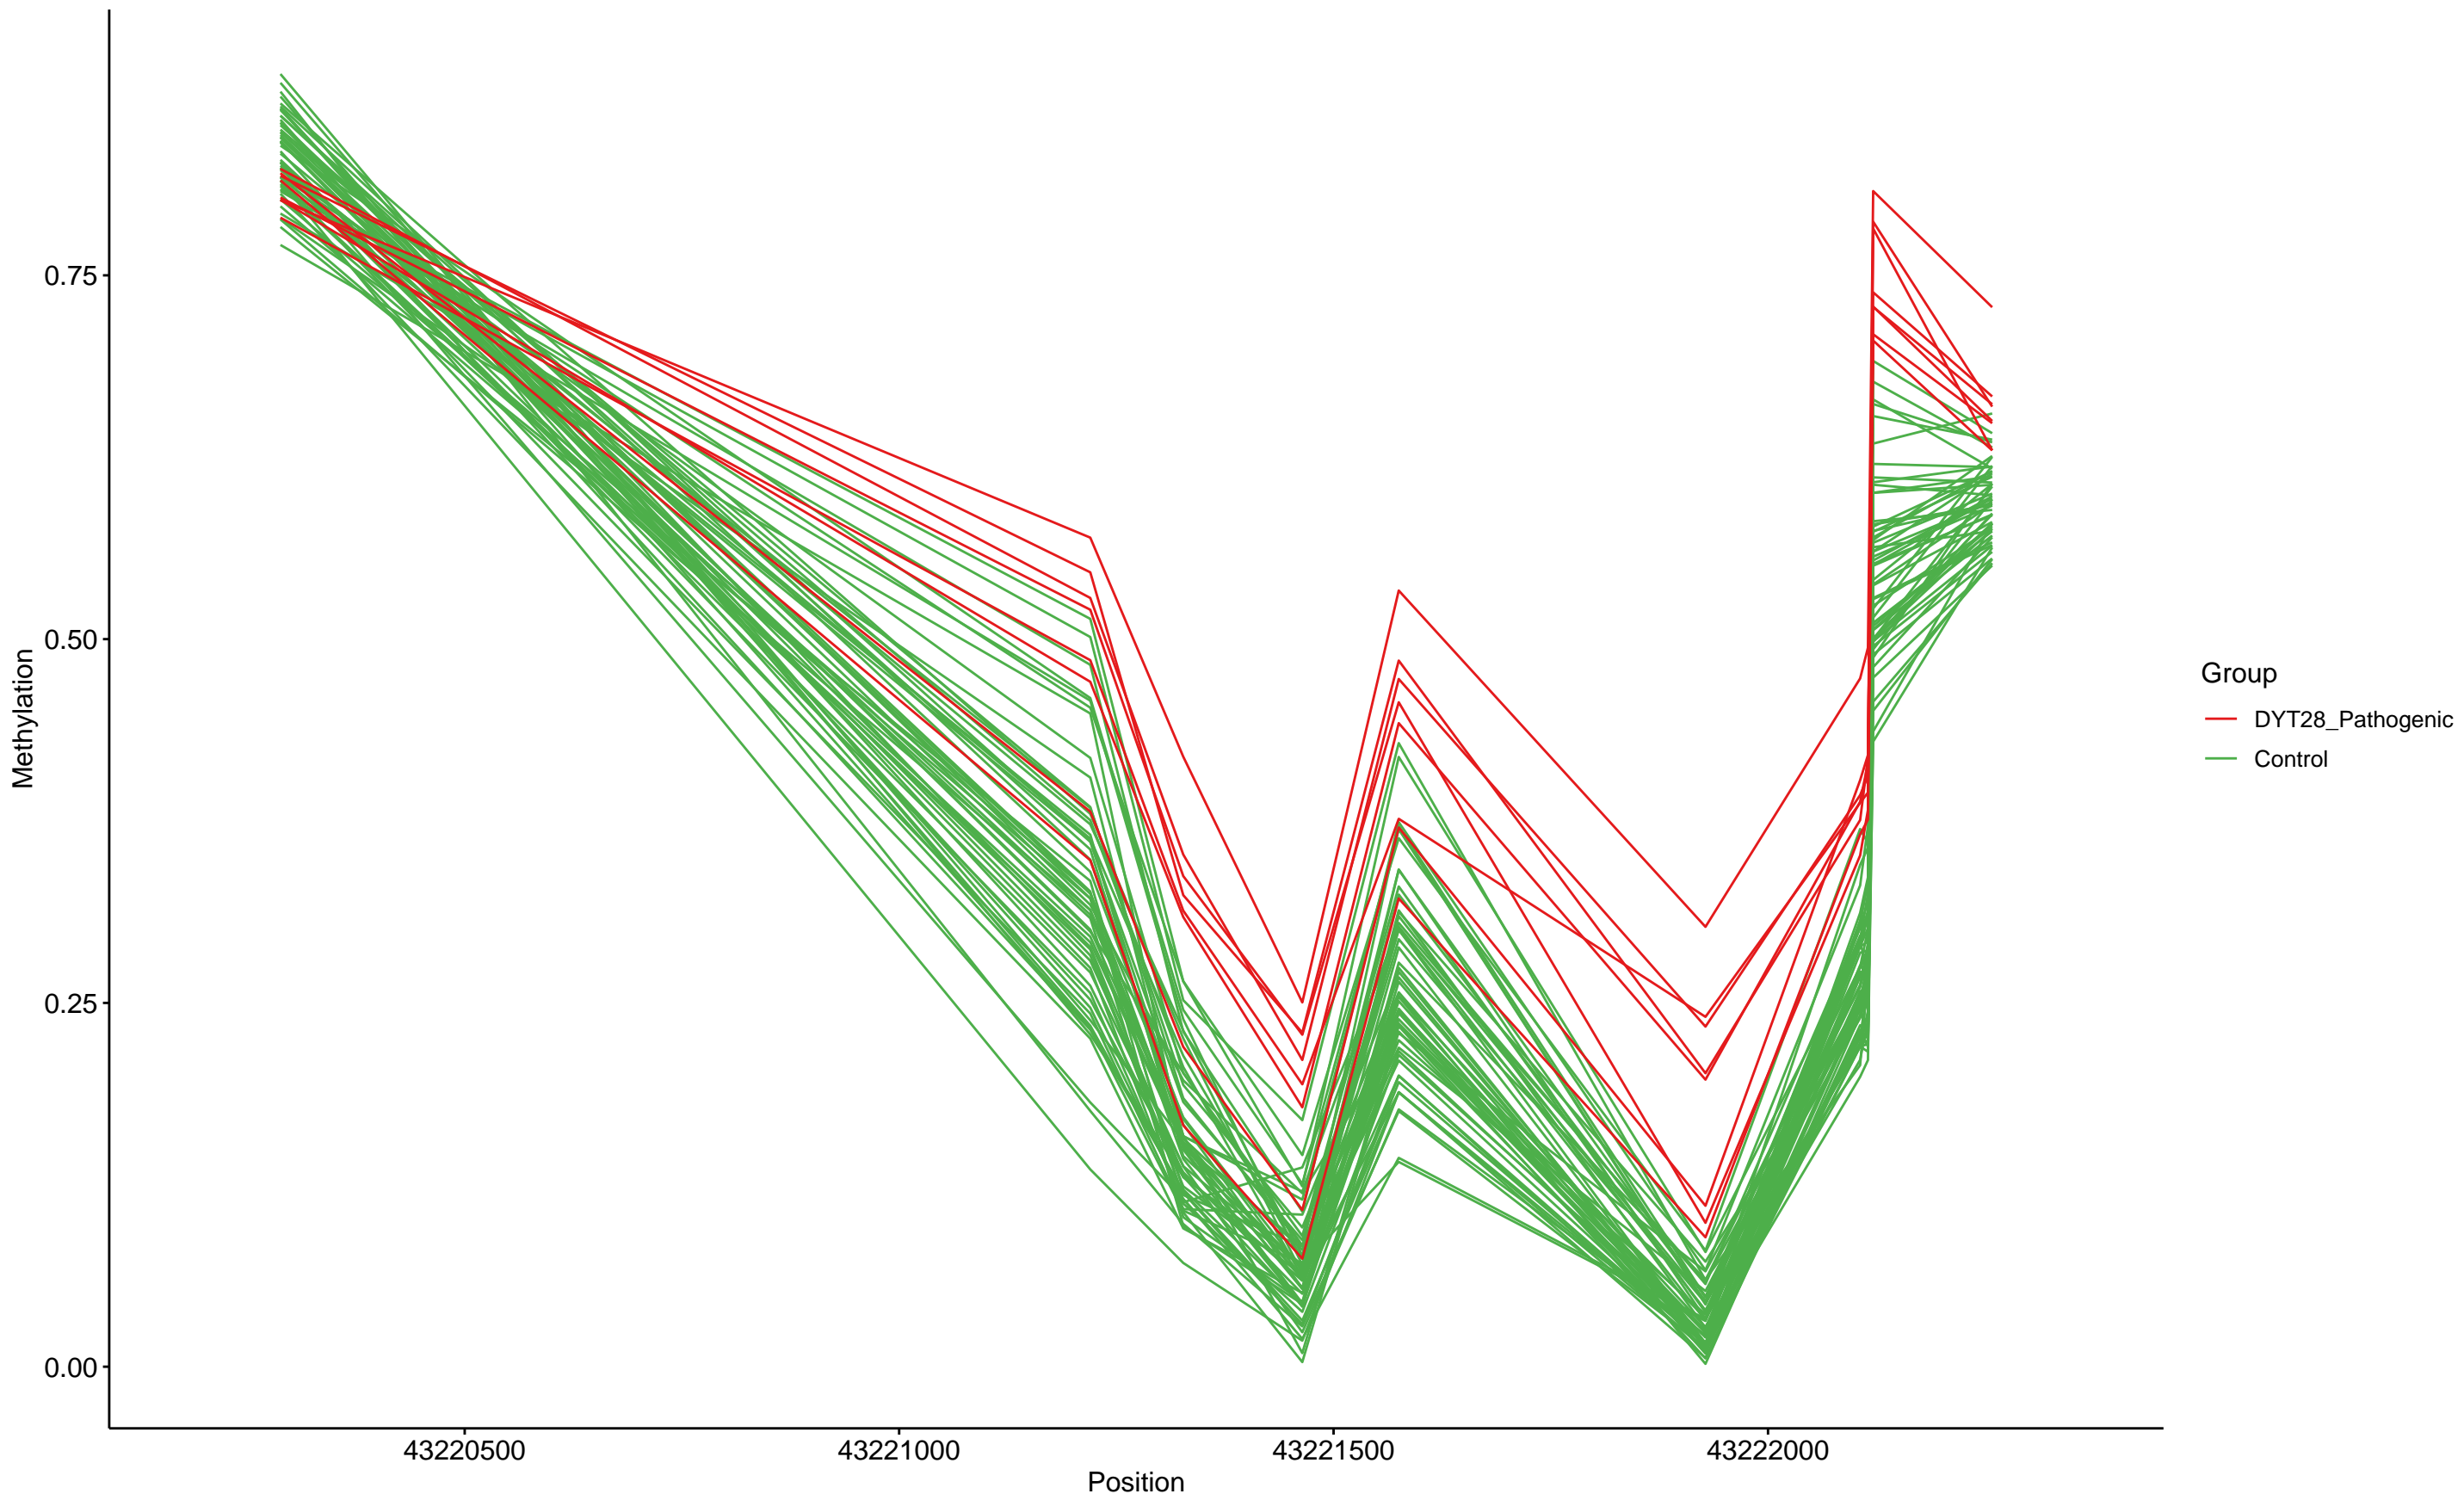



Region 49: chr1:247802464–247803706

Fisher: 1.53346620935307e-47

Stouffer: 1.62723902212587e-48

Mean difference: 0.16086311050363

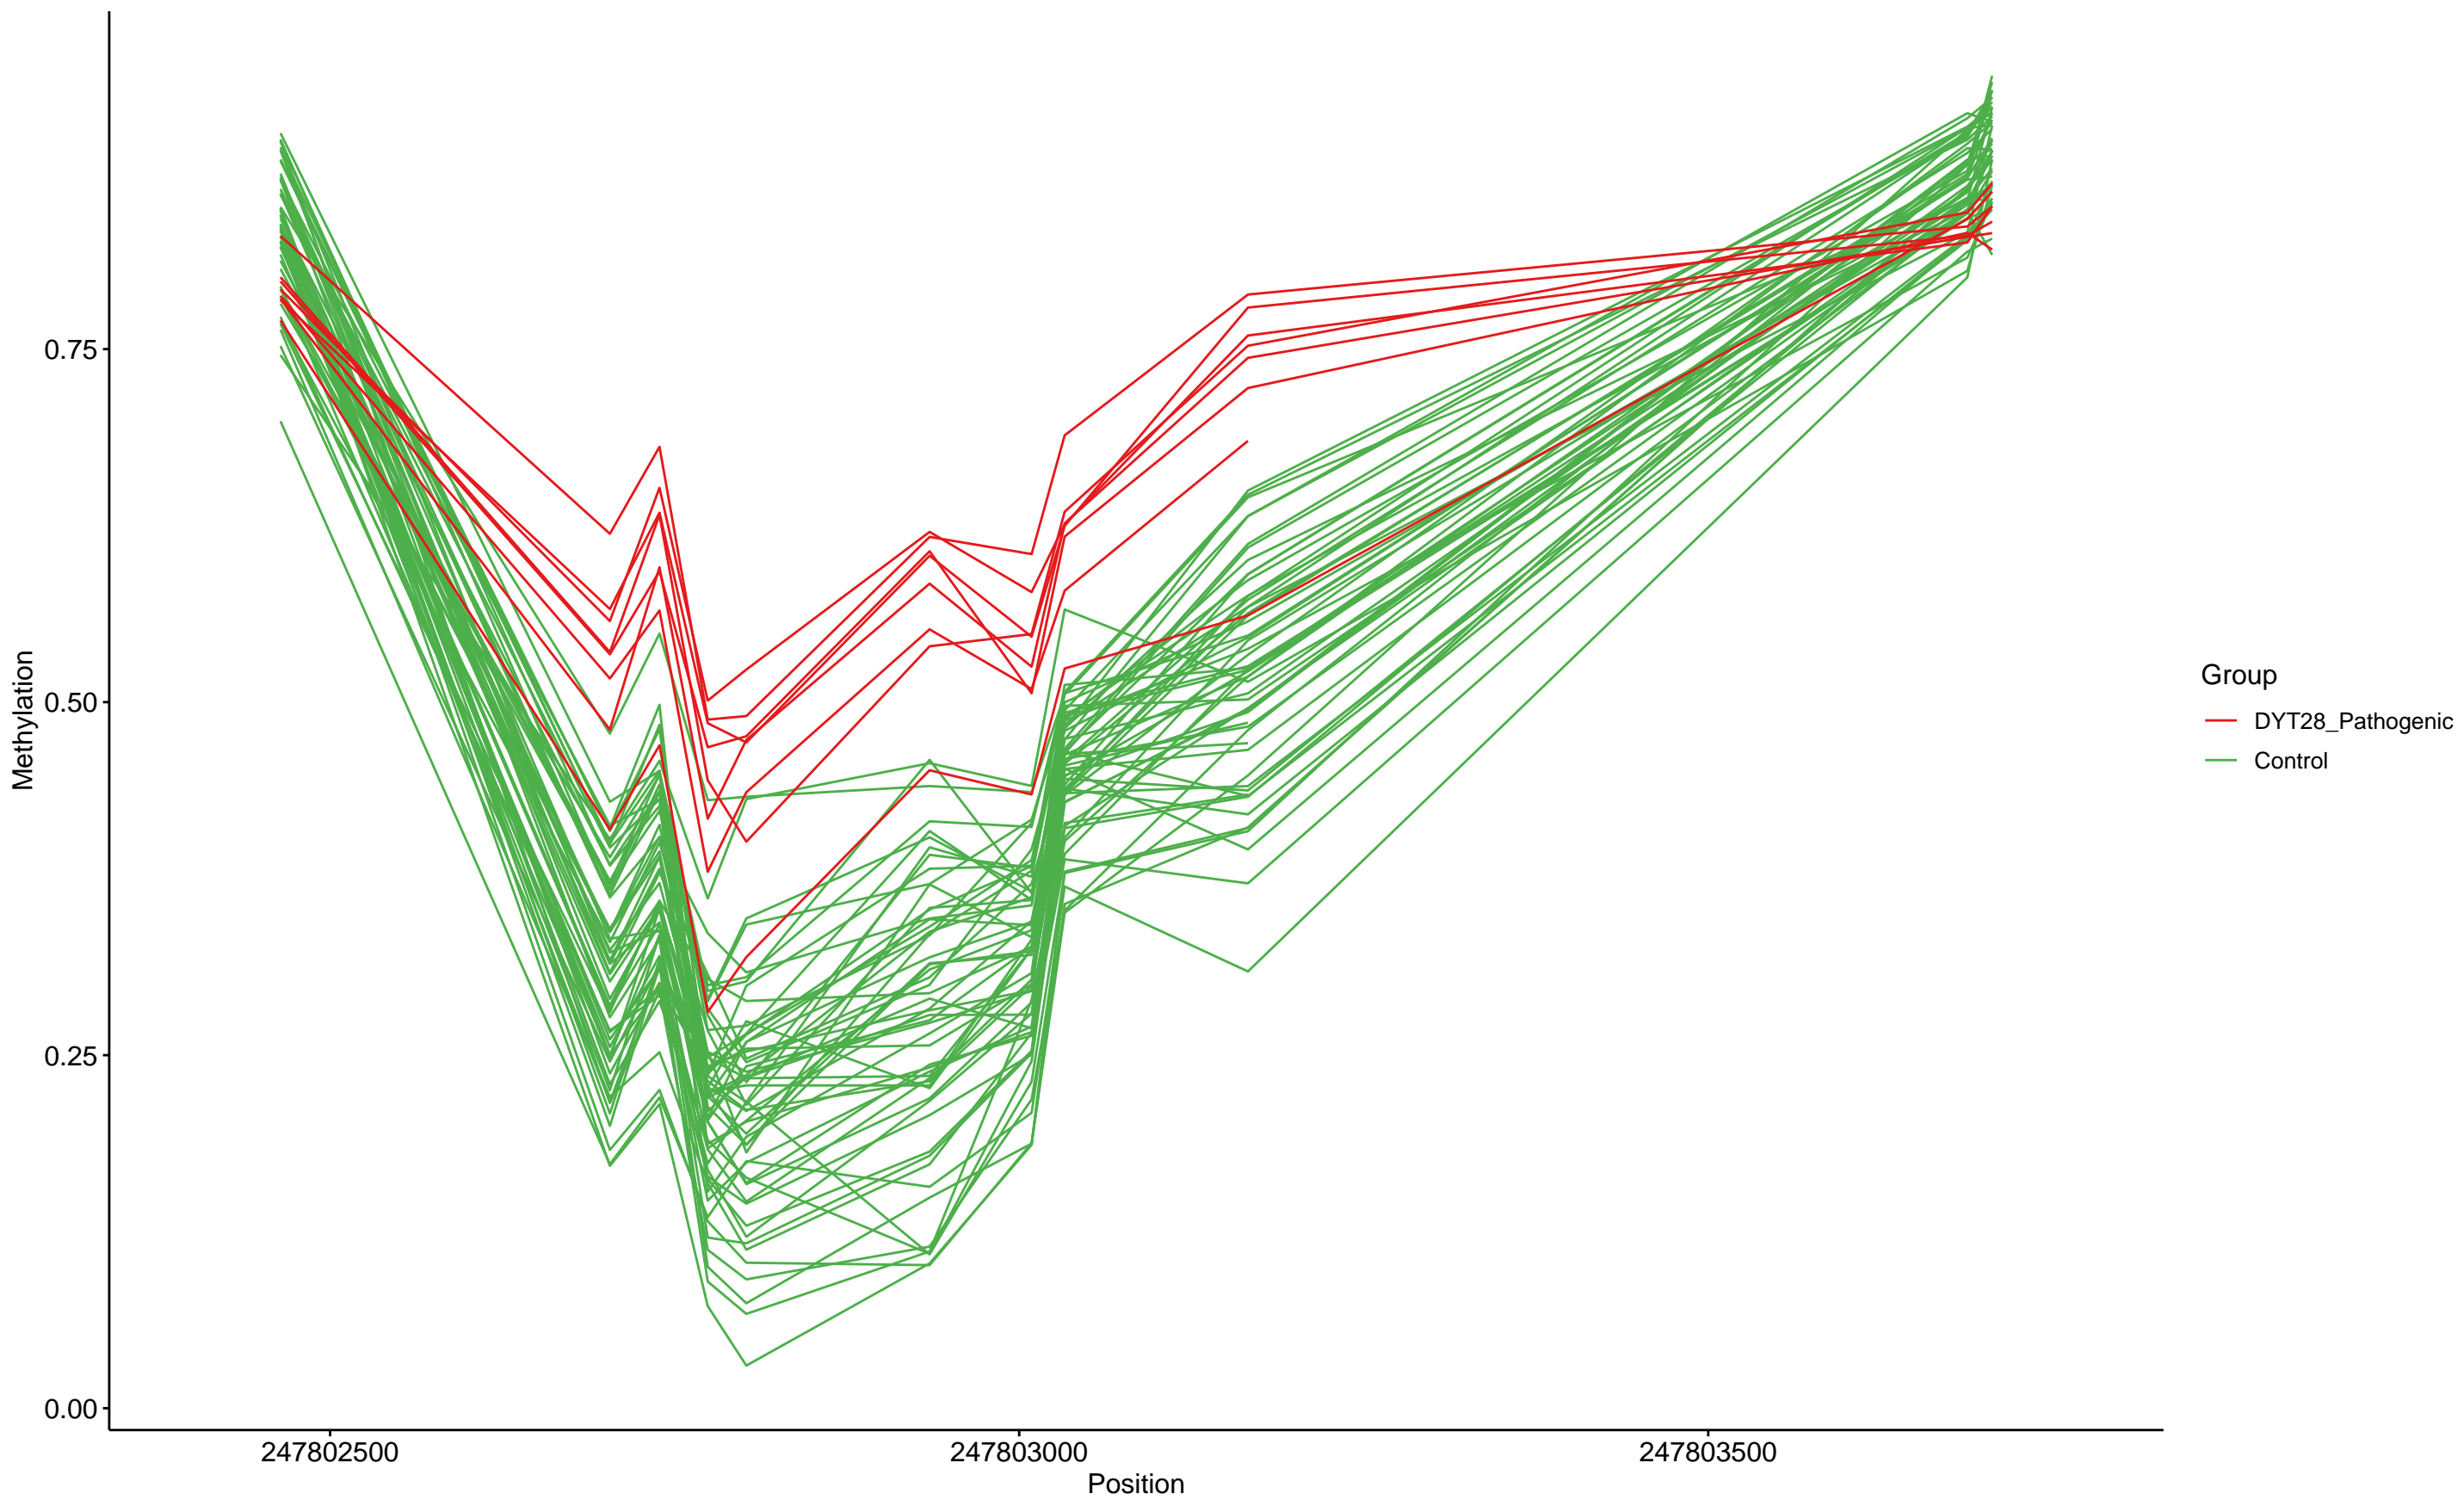

Region 50: chr18:47824260-47826196

Fisher: 1.26040001026301e-46

Stouffer: 2.0121306087614e-43

Mean difference: 0.102668305492172

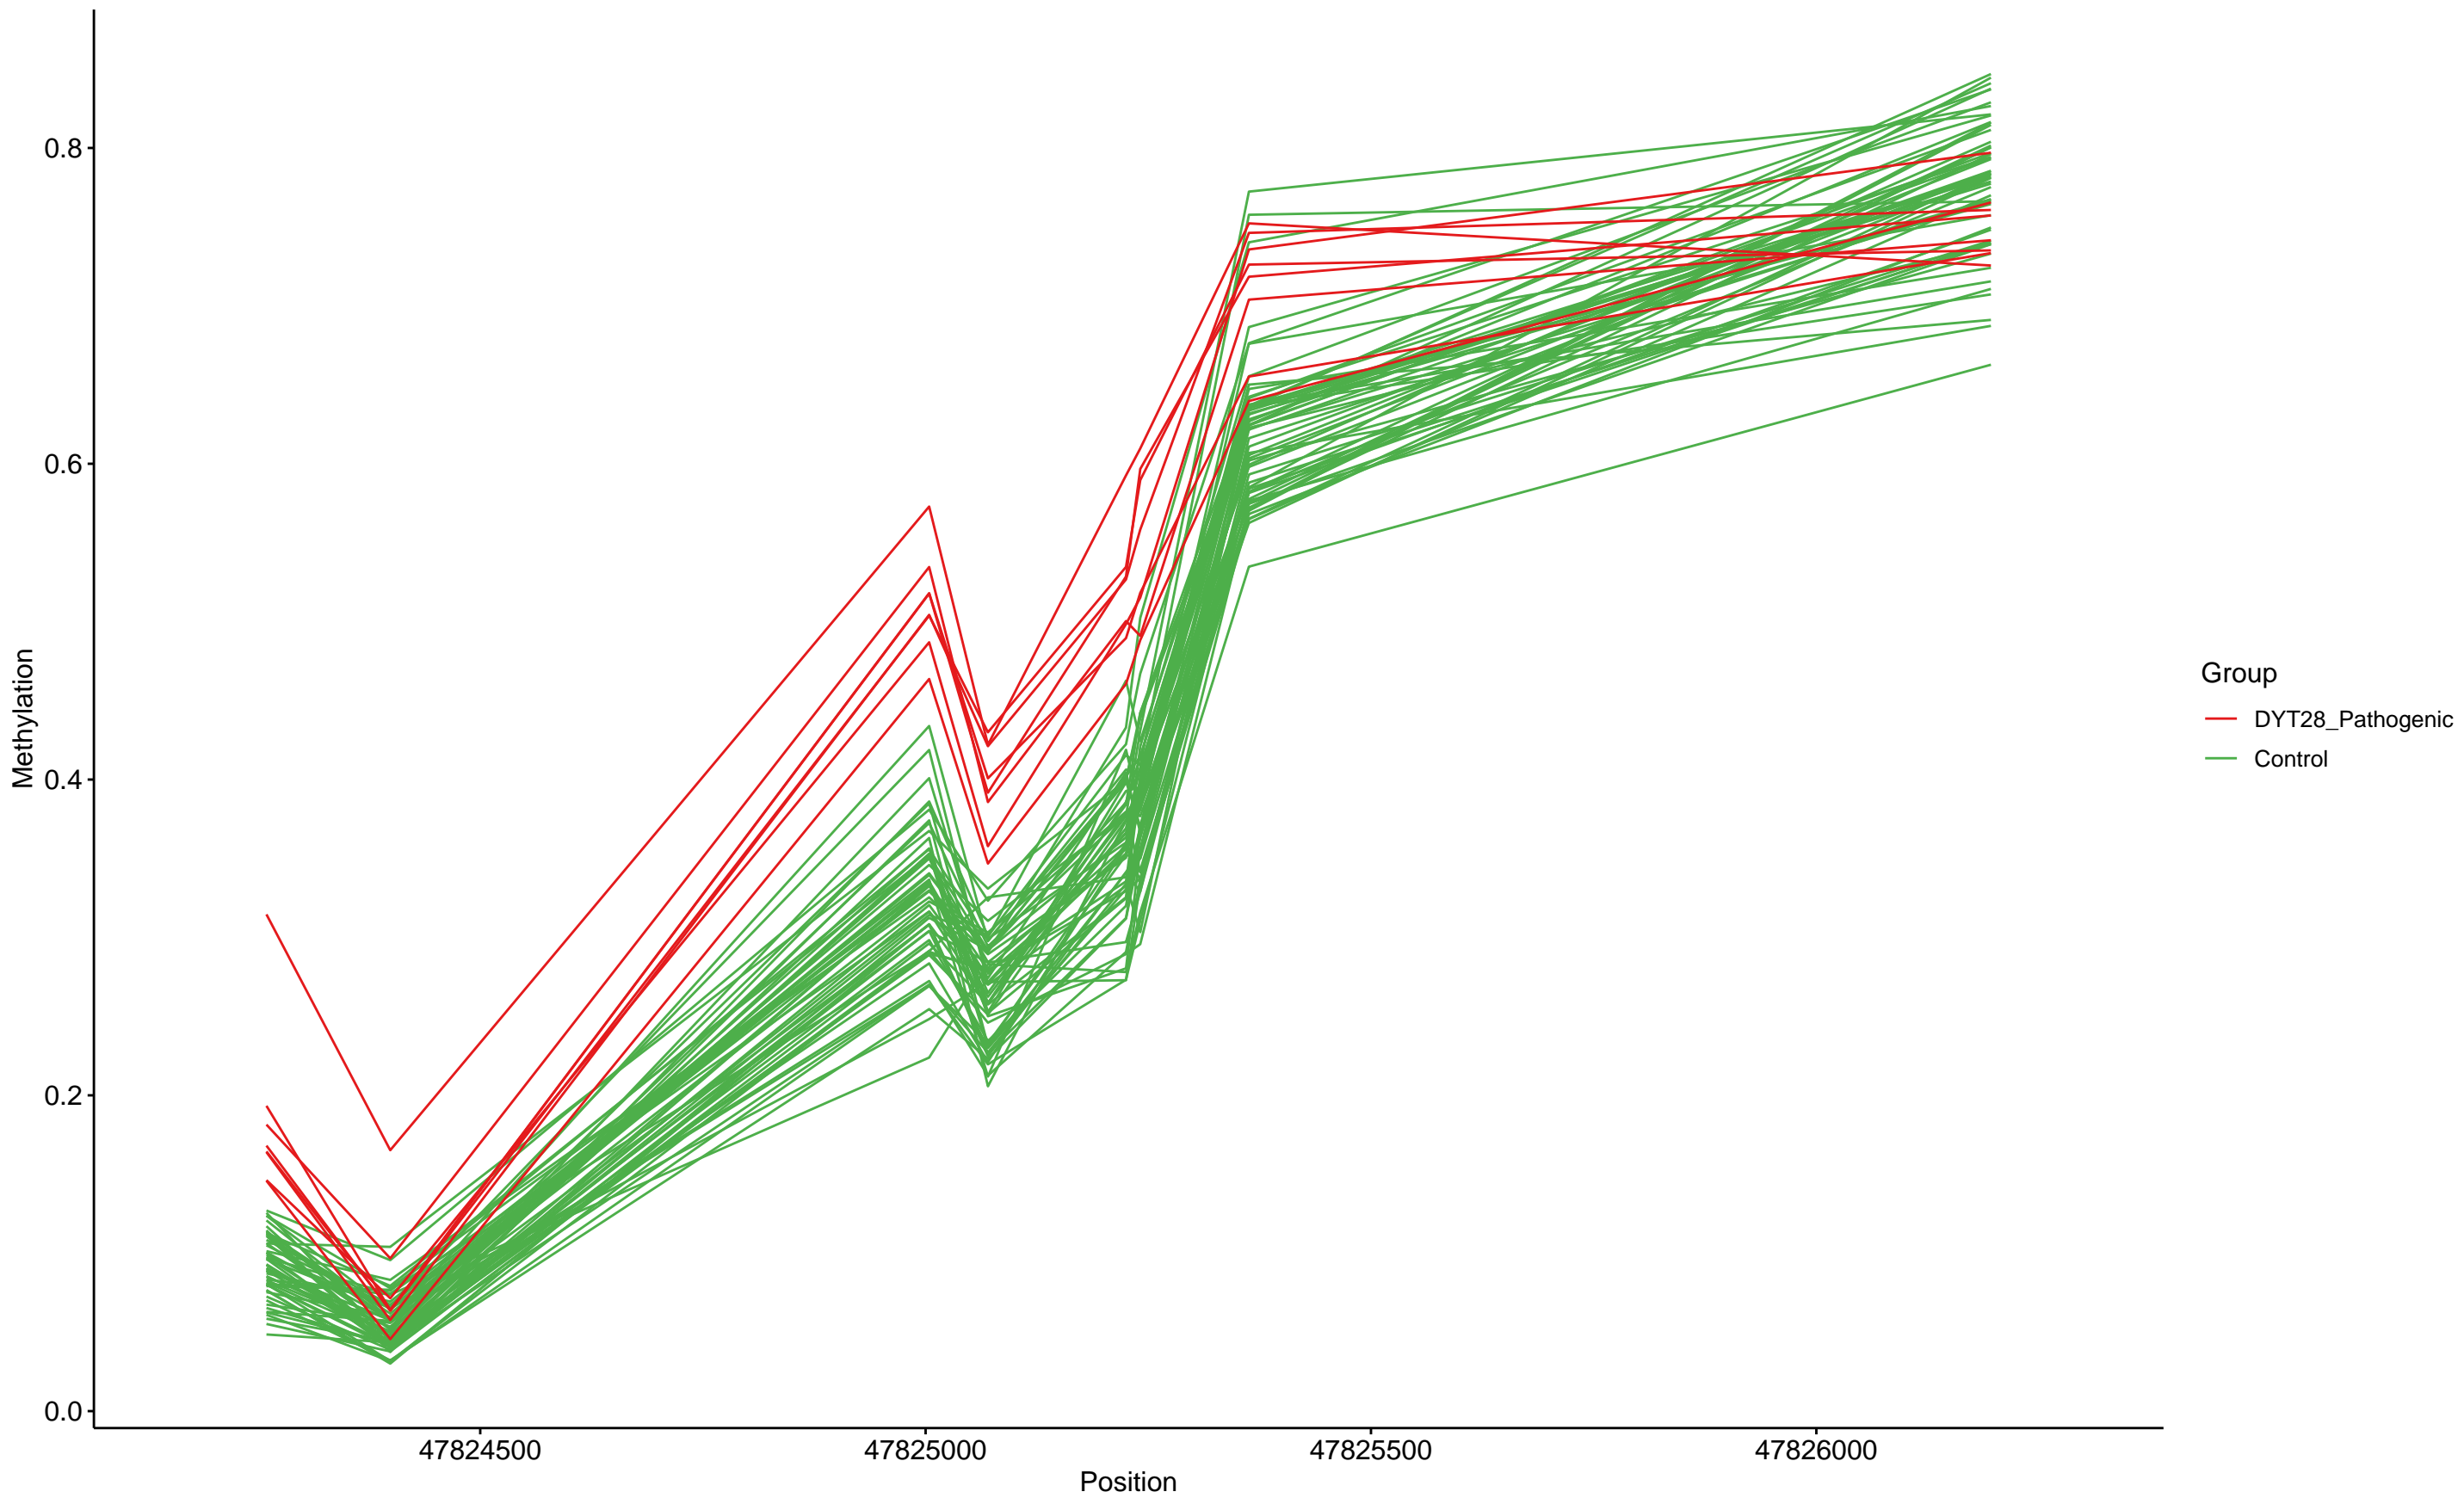

Region 51: chr16:53406197-53407594

Fisher: 3.38787634852156e-46

Stouffer: 5.28639317670953e-46

Mean difference: 0.199947059452058

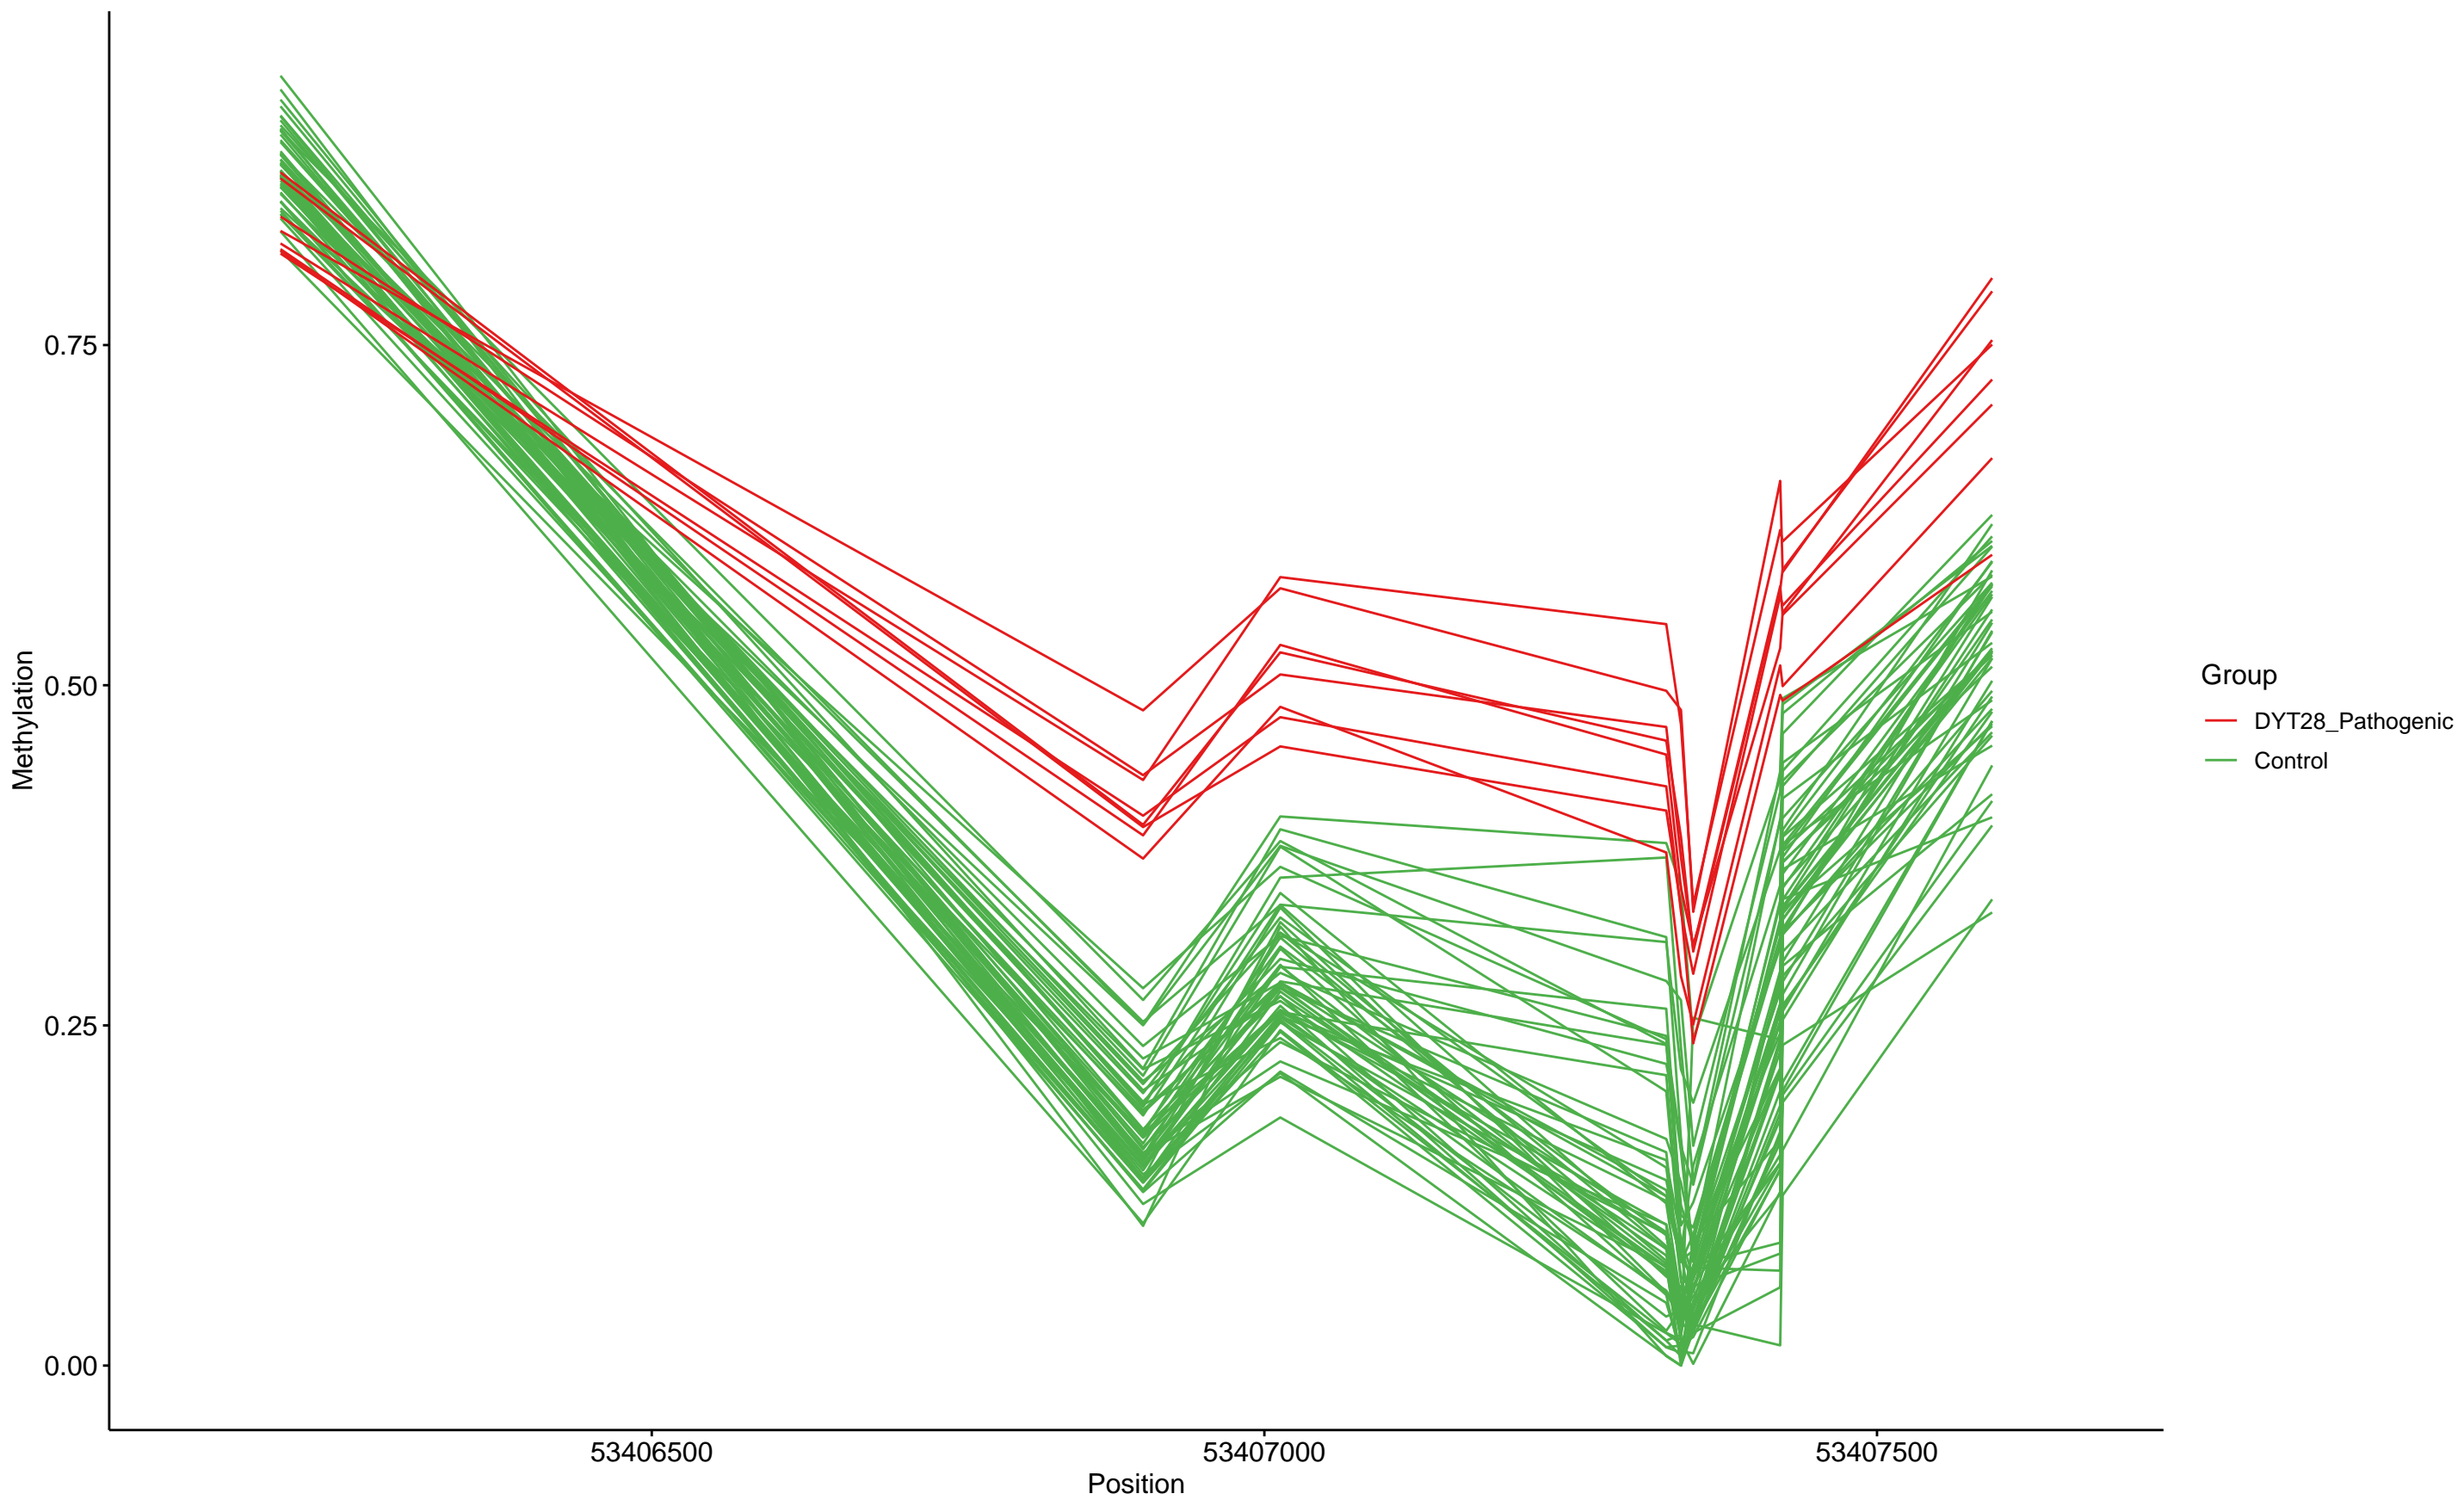

Region 52: chr3:170746012-170746586

Fisher: 5.23327635796261e-45

Stouffer: 6.08591461320962e-46

Mean difference: 0.103337783195747

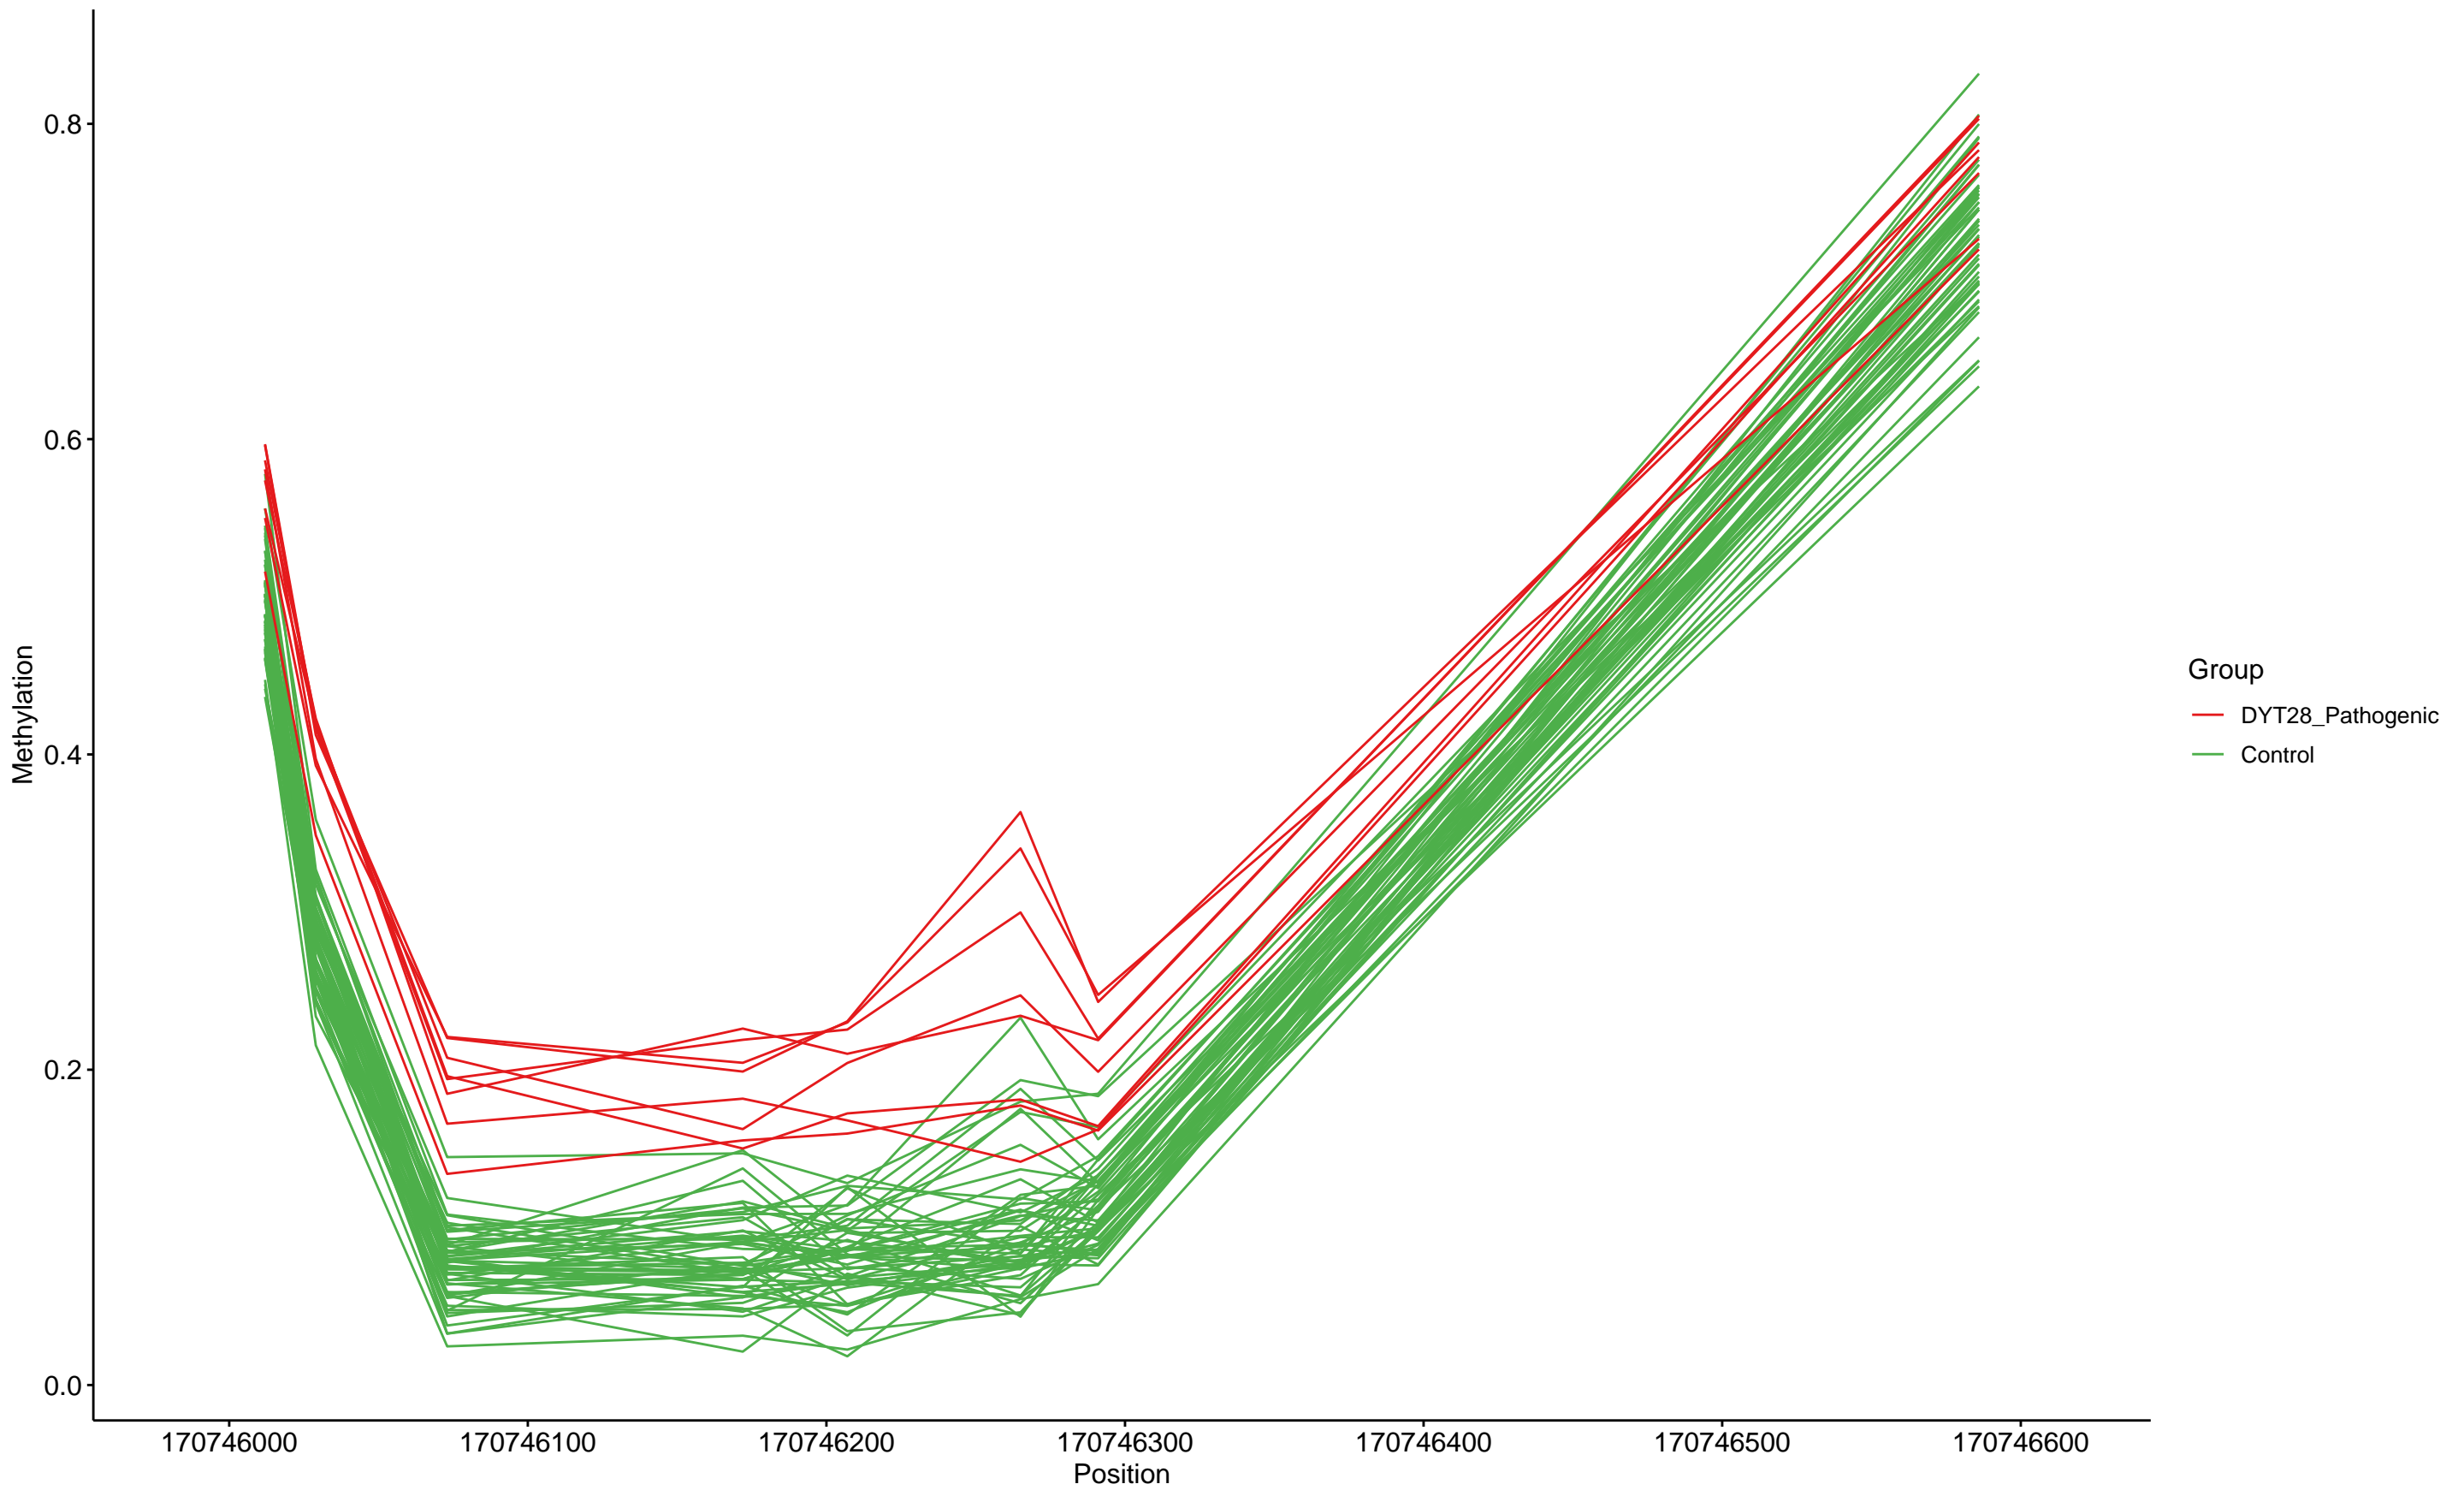



Region 53: chr5:68710325-68711640

Fisher: 1.72394597853239e-44

Stouffer: 4.31310809051567e-44

Mean difference: 0.118638851818409

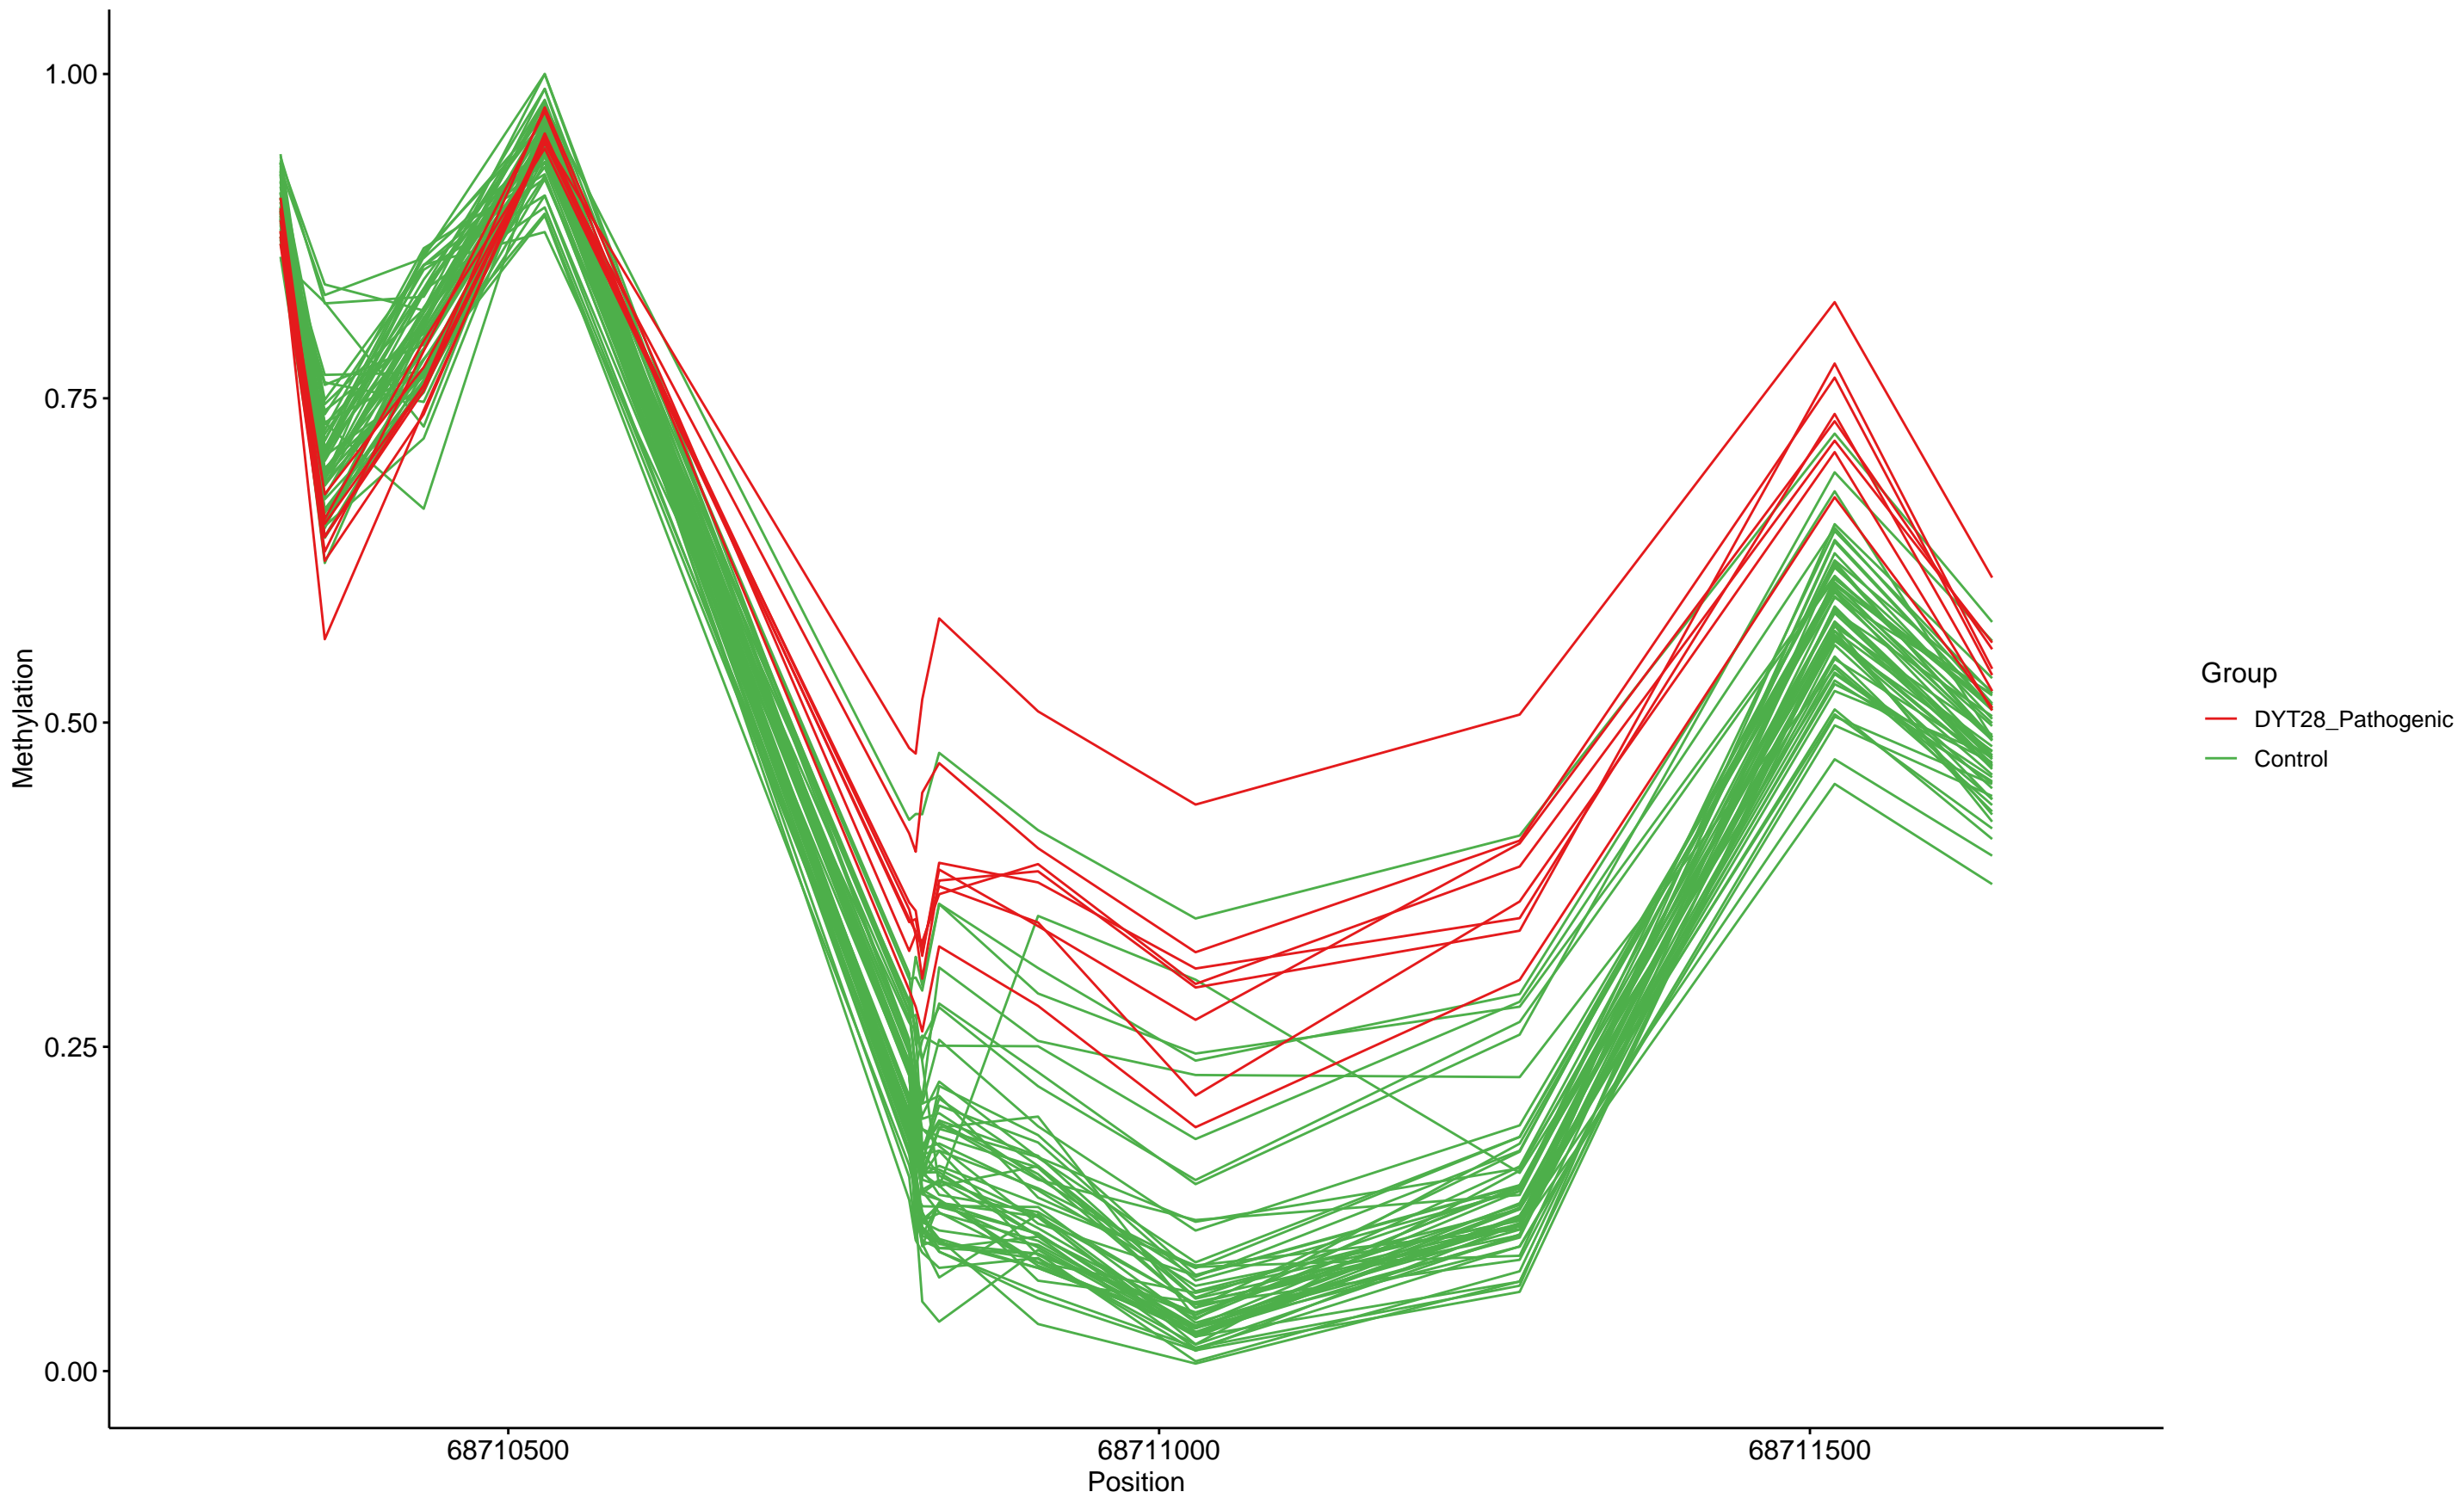

Region 54: chr17:36665826–36667782

Fisher: 3.27097205815157e-44

Stouffer: 2.47081126643173e-42

Mean difference: 0.100974466207781

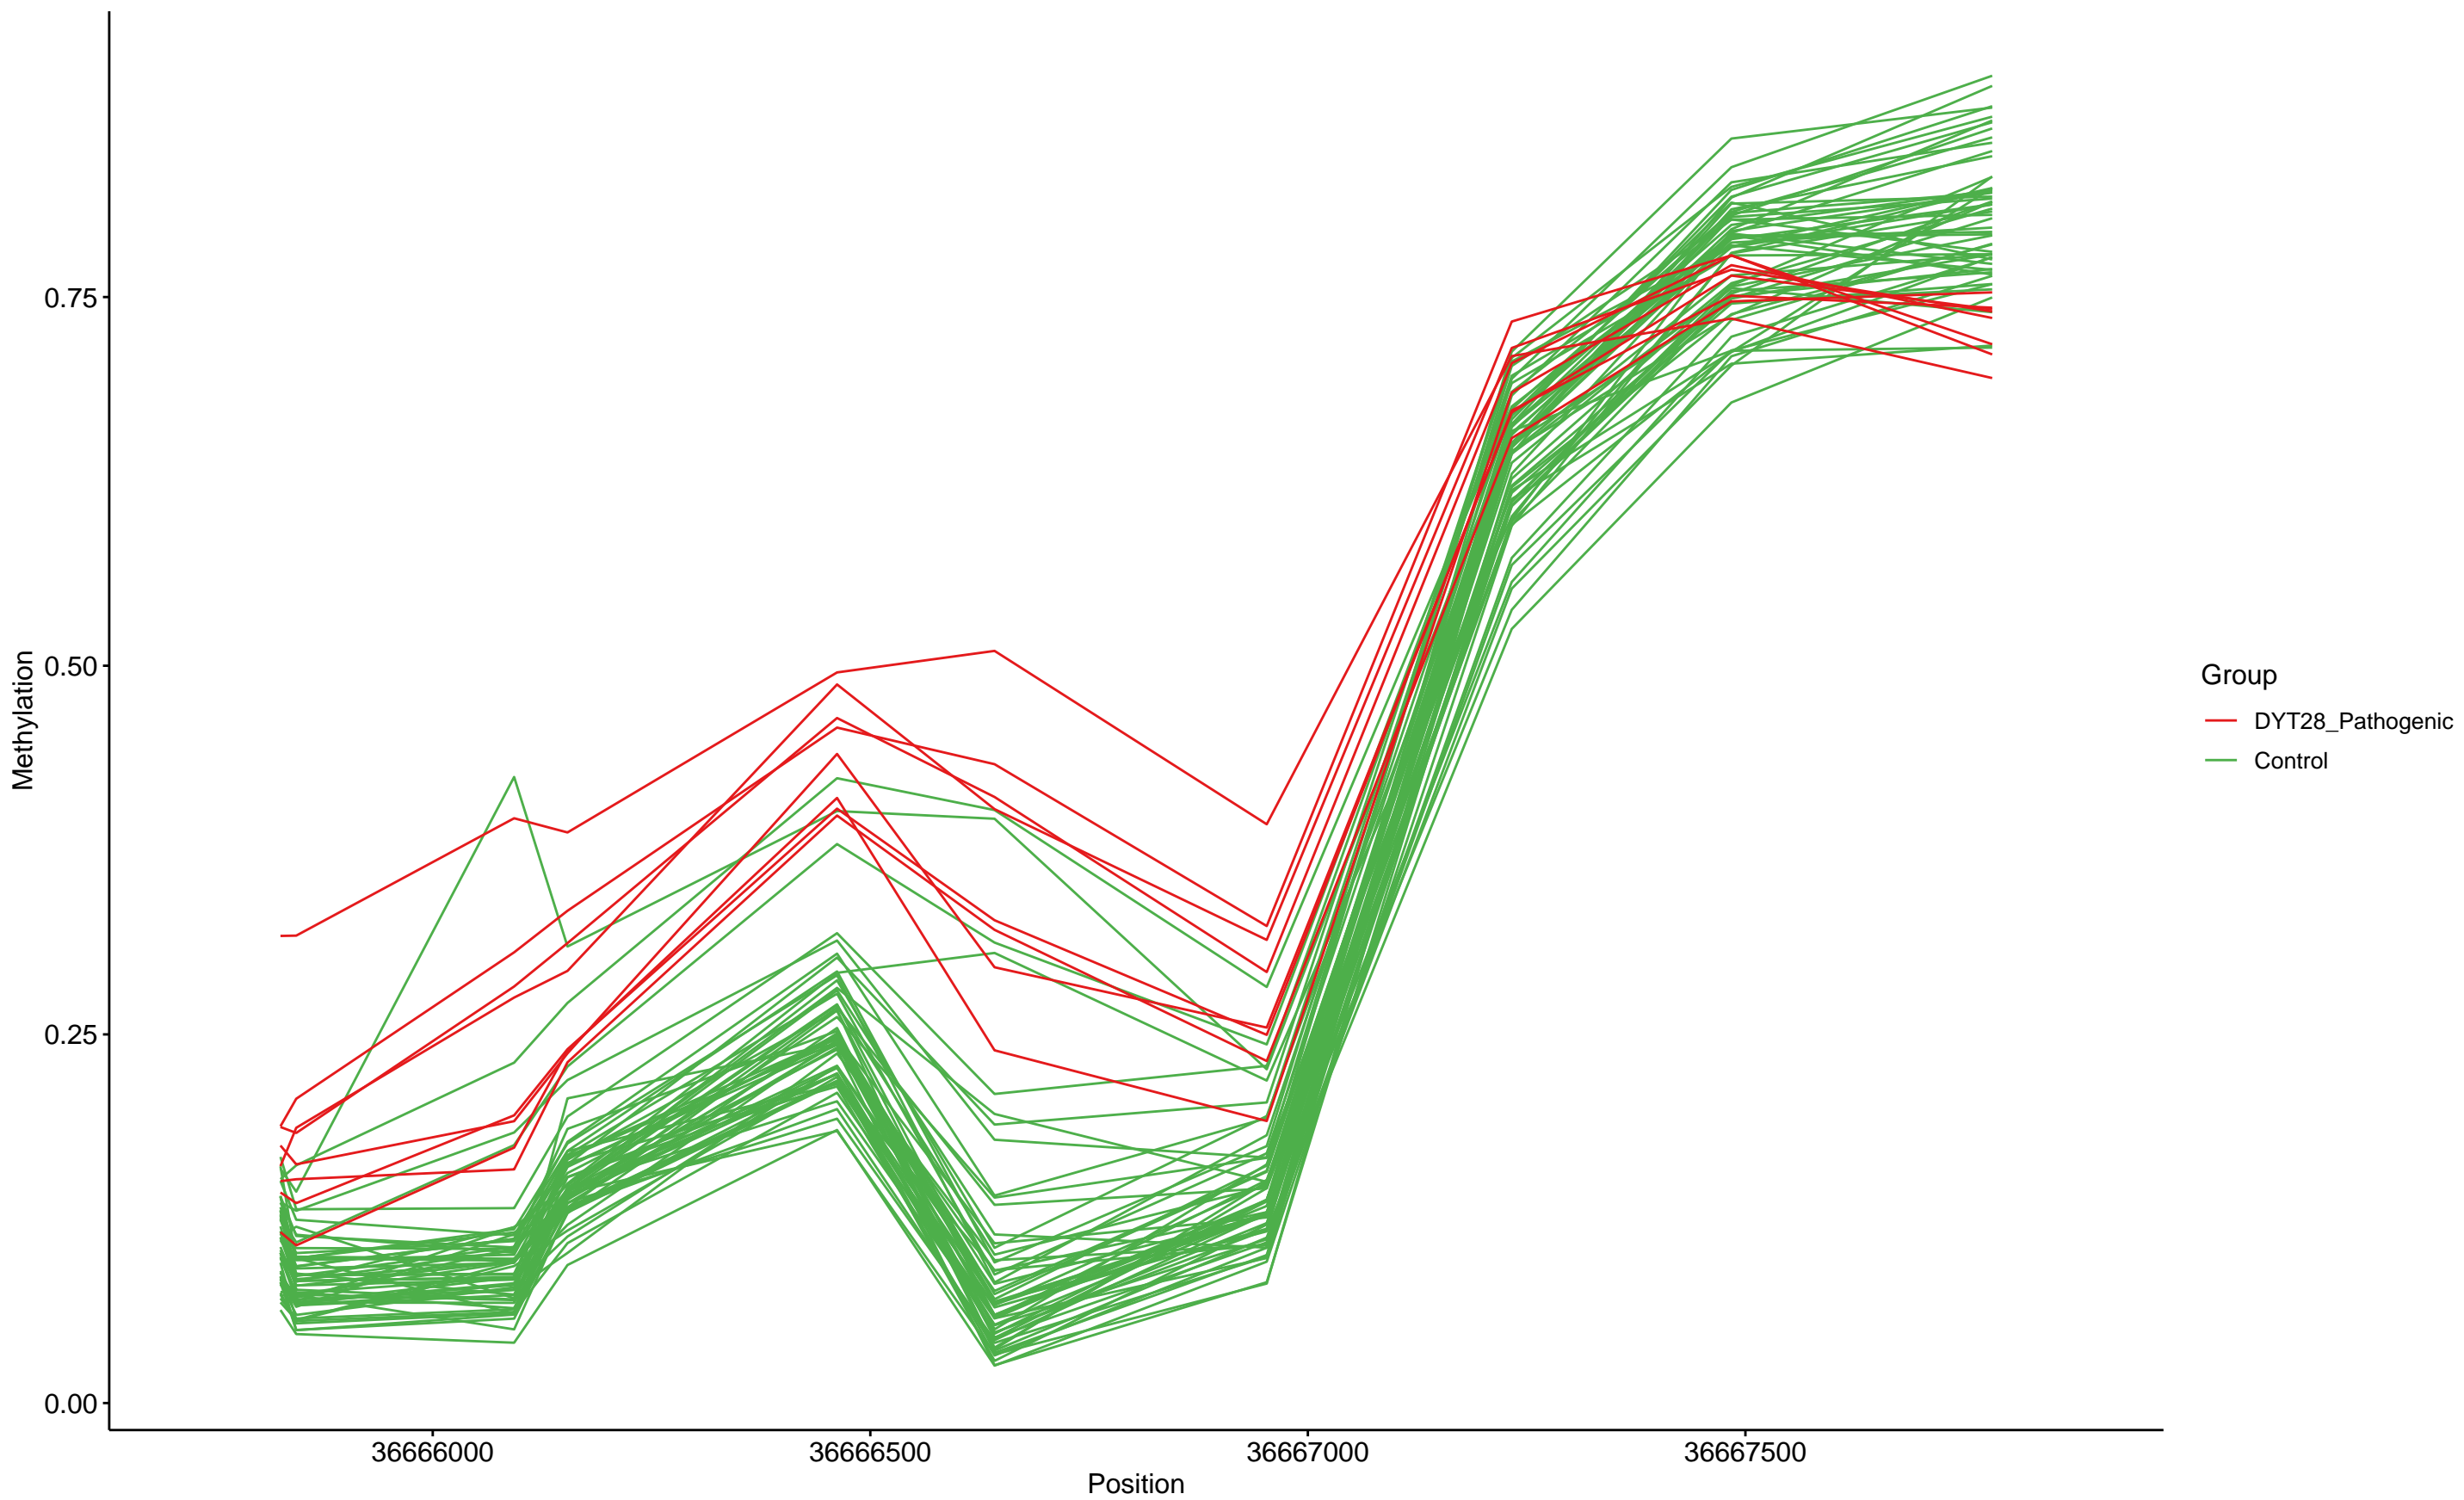

Region 55: chr12:48690449–48691036

Fisher:  $4.90805443401067e-43$

Stouffer:  $4.37399388547352e-40$

Mean difference: 0.133333947770581

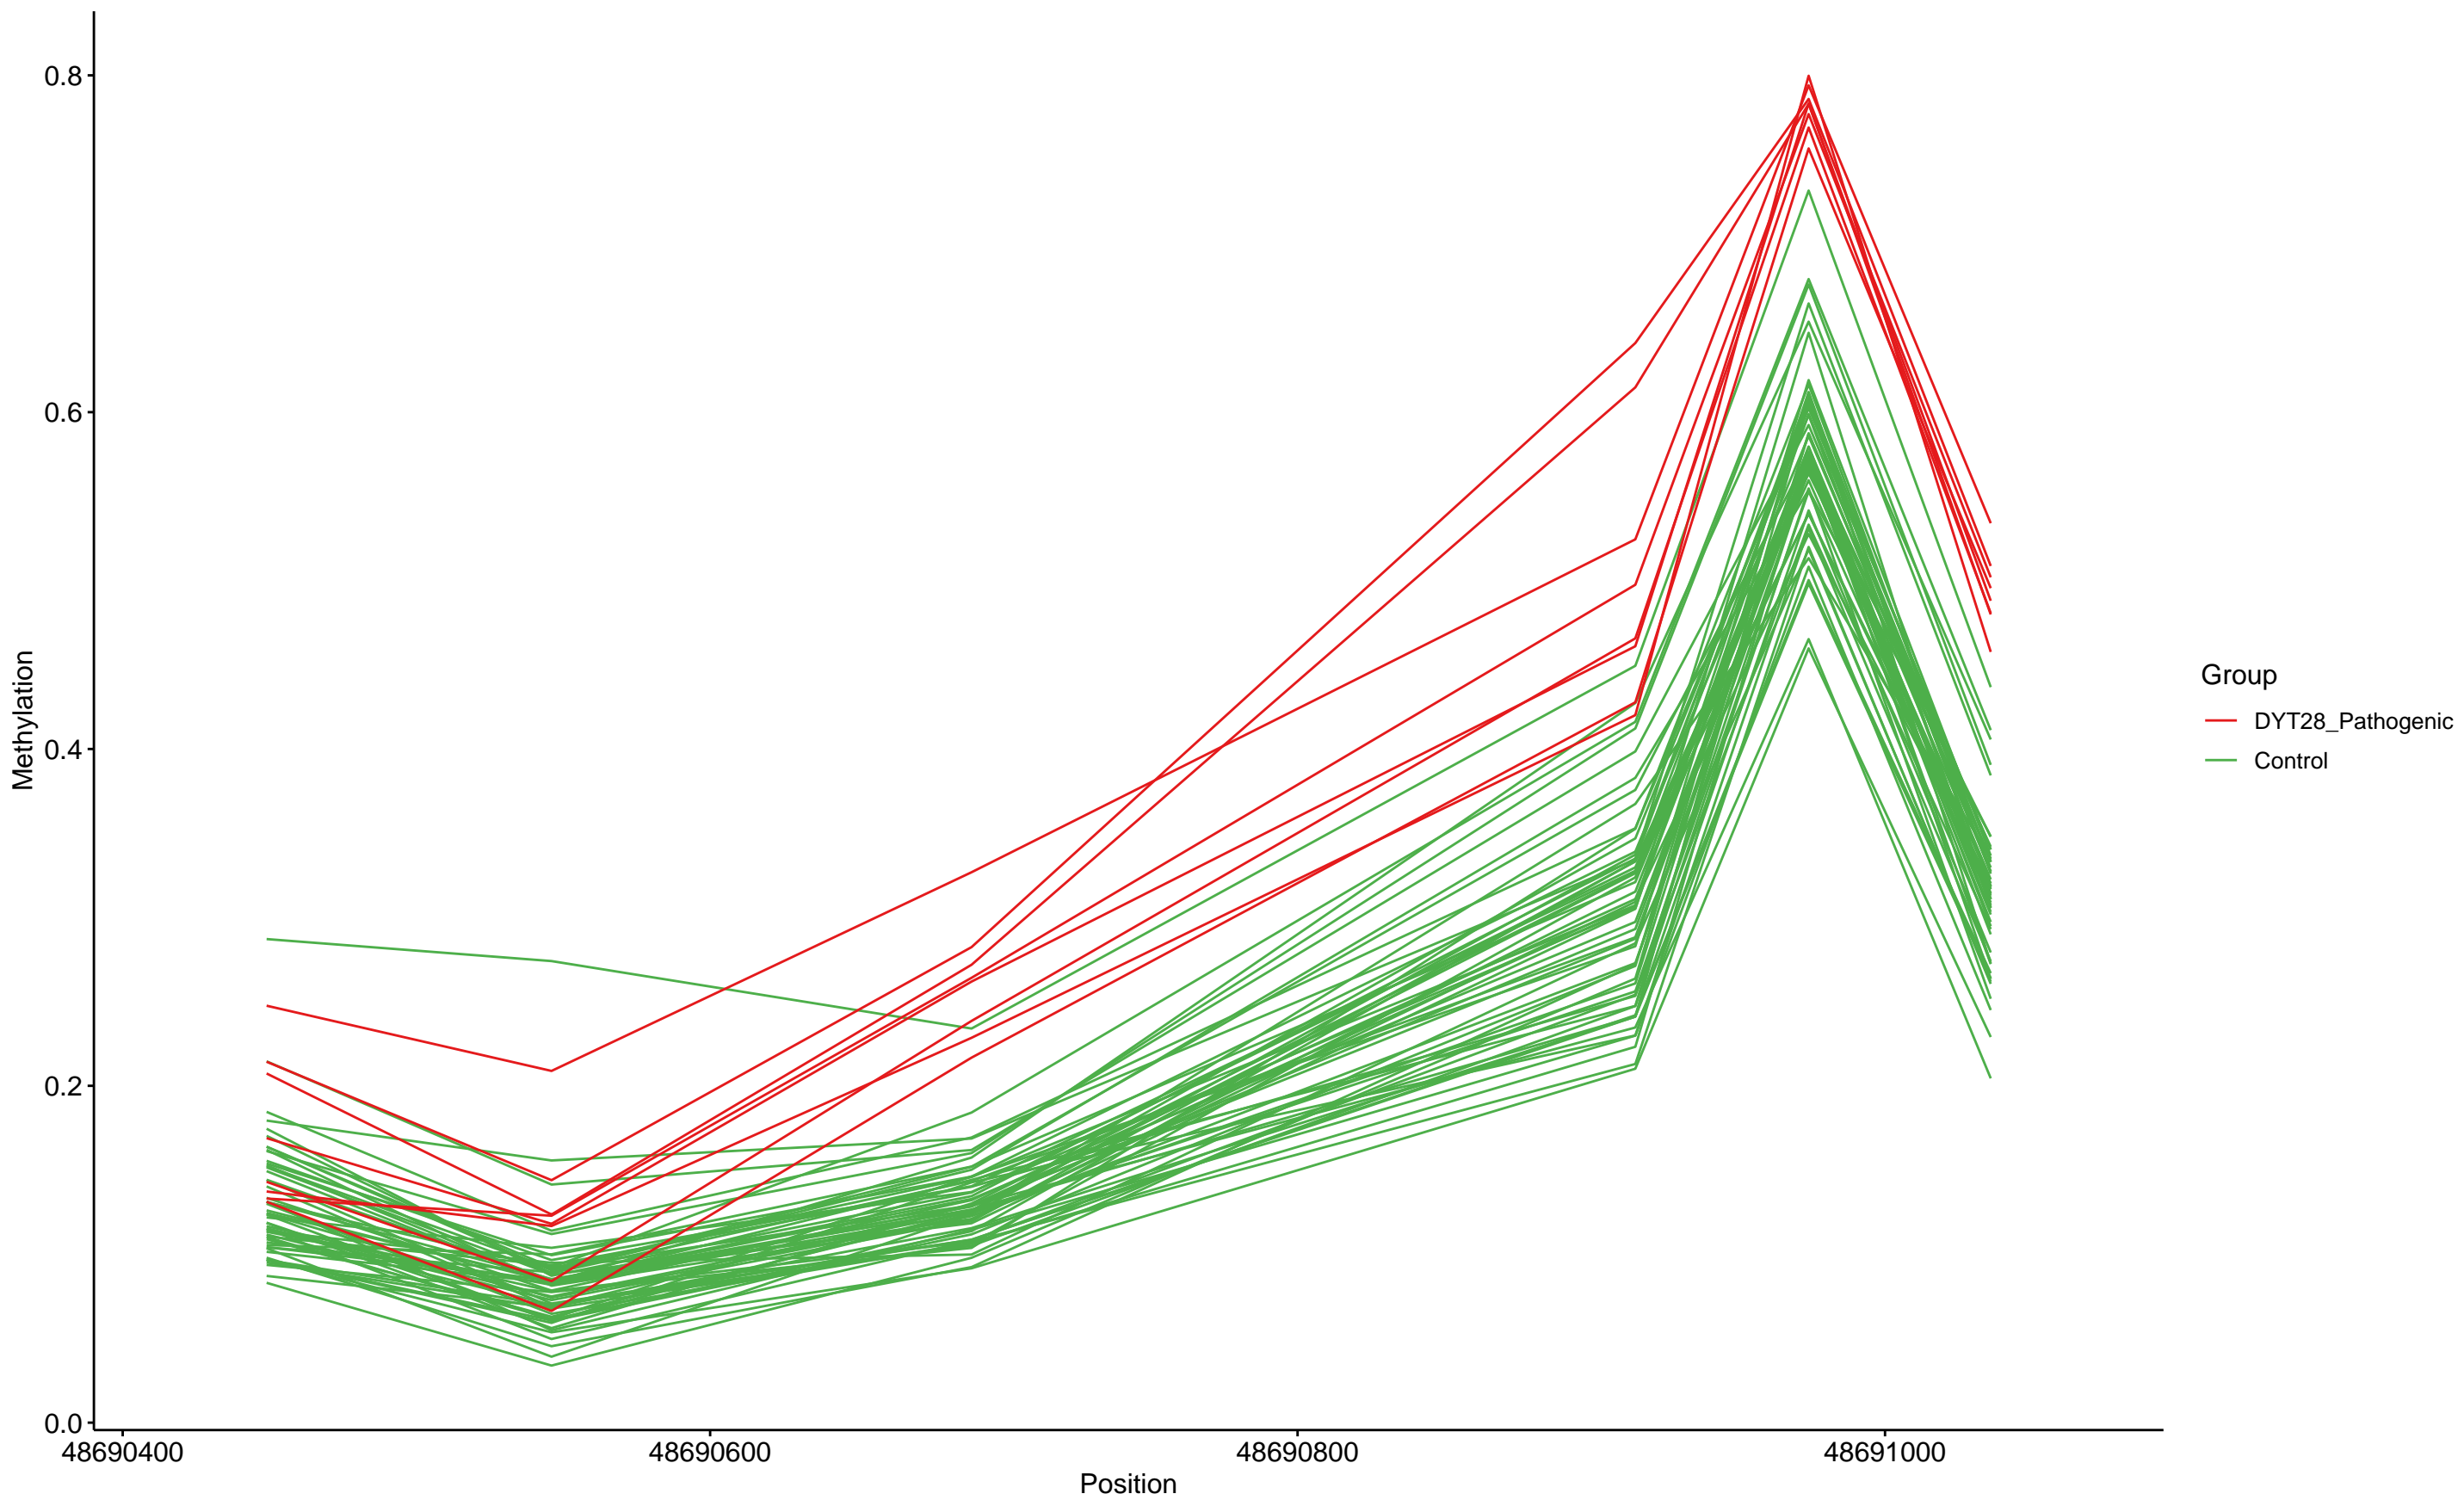

Region 56: chr1:169429525–169430464

Fisher:  $9.08705491926349e-42$

Stouffer:  $6.50734376917142e-38$

Mean difference: 0.136593064769265

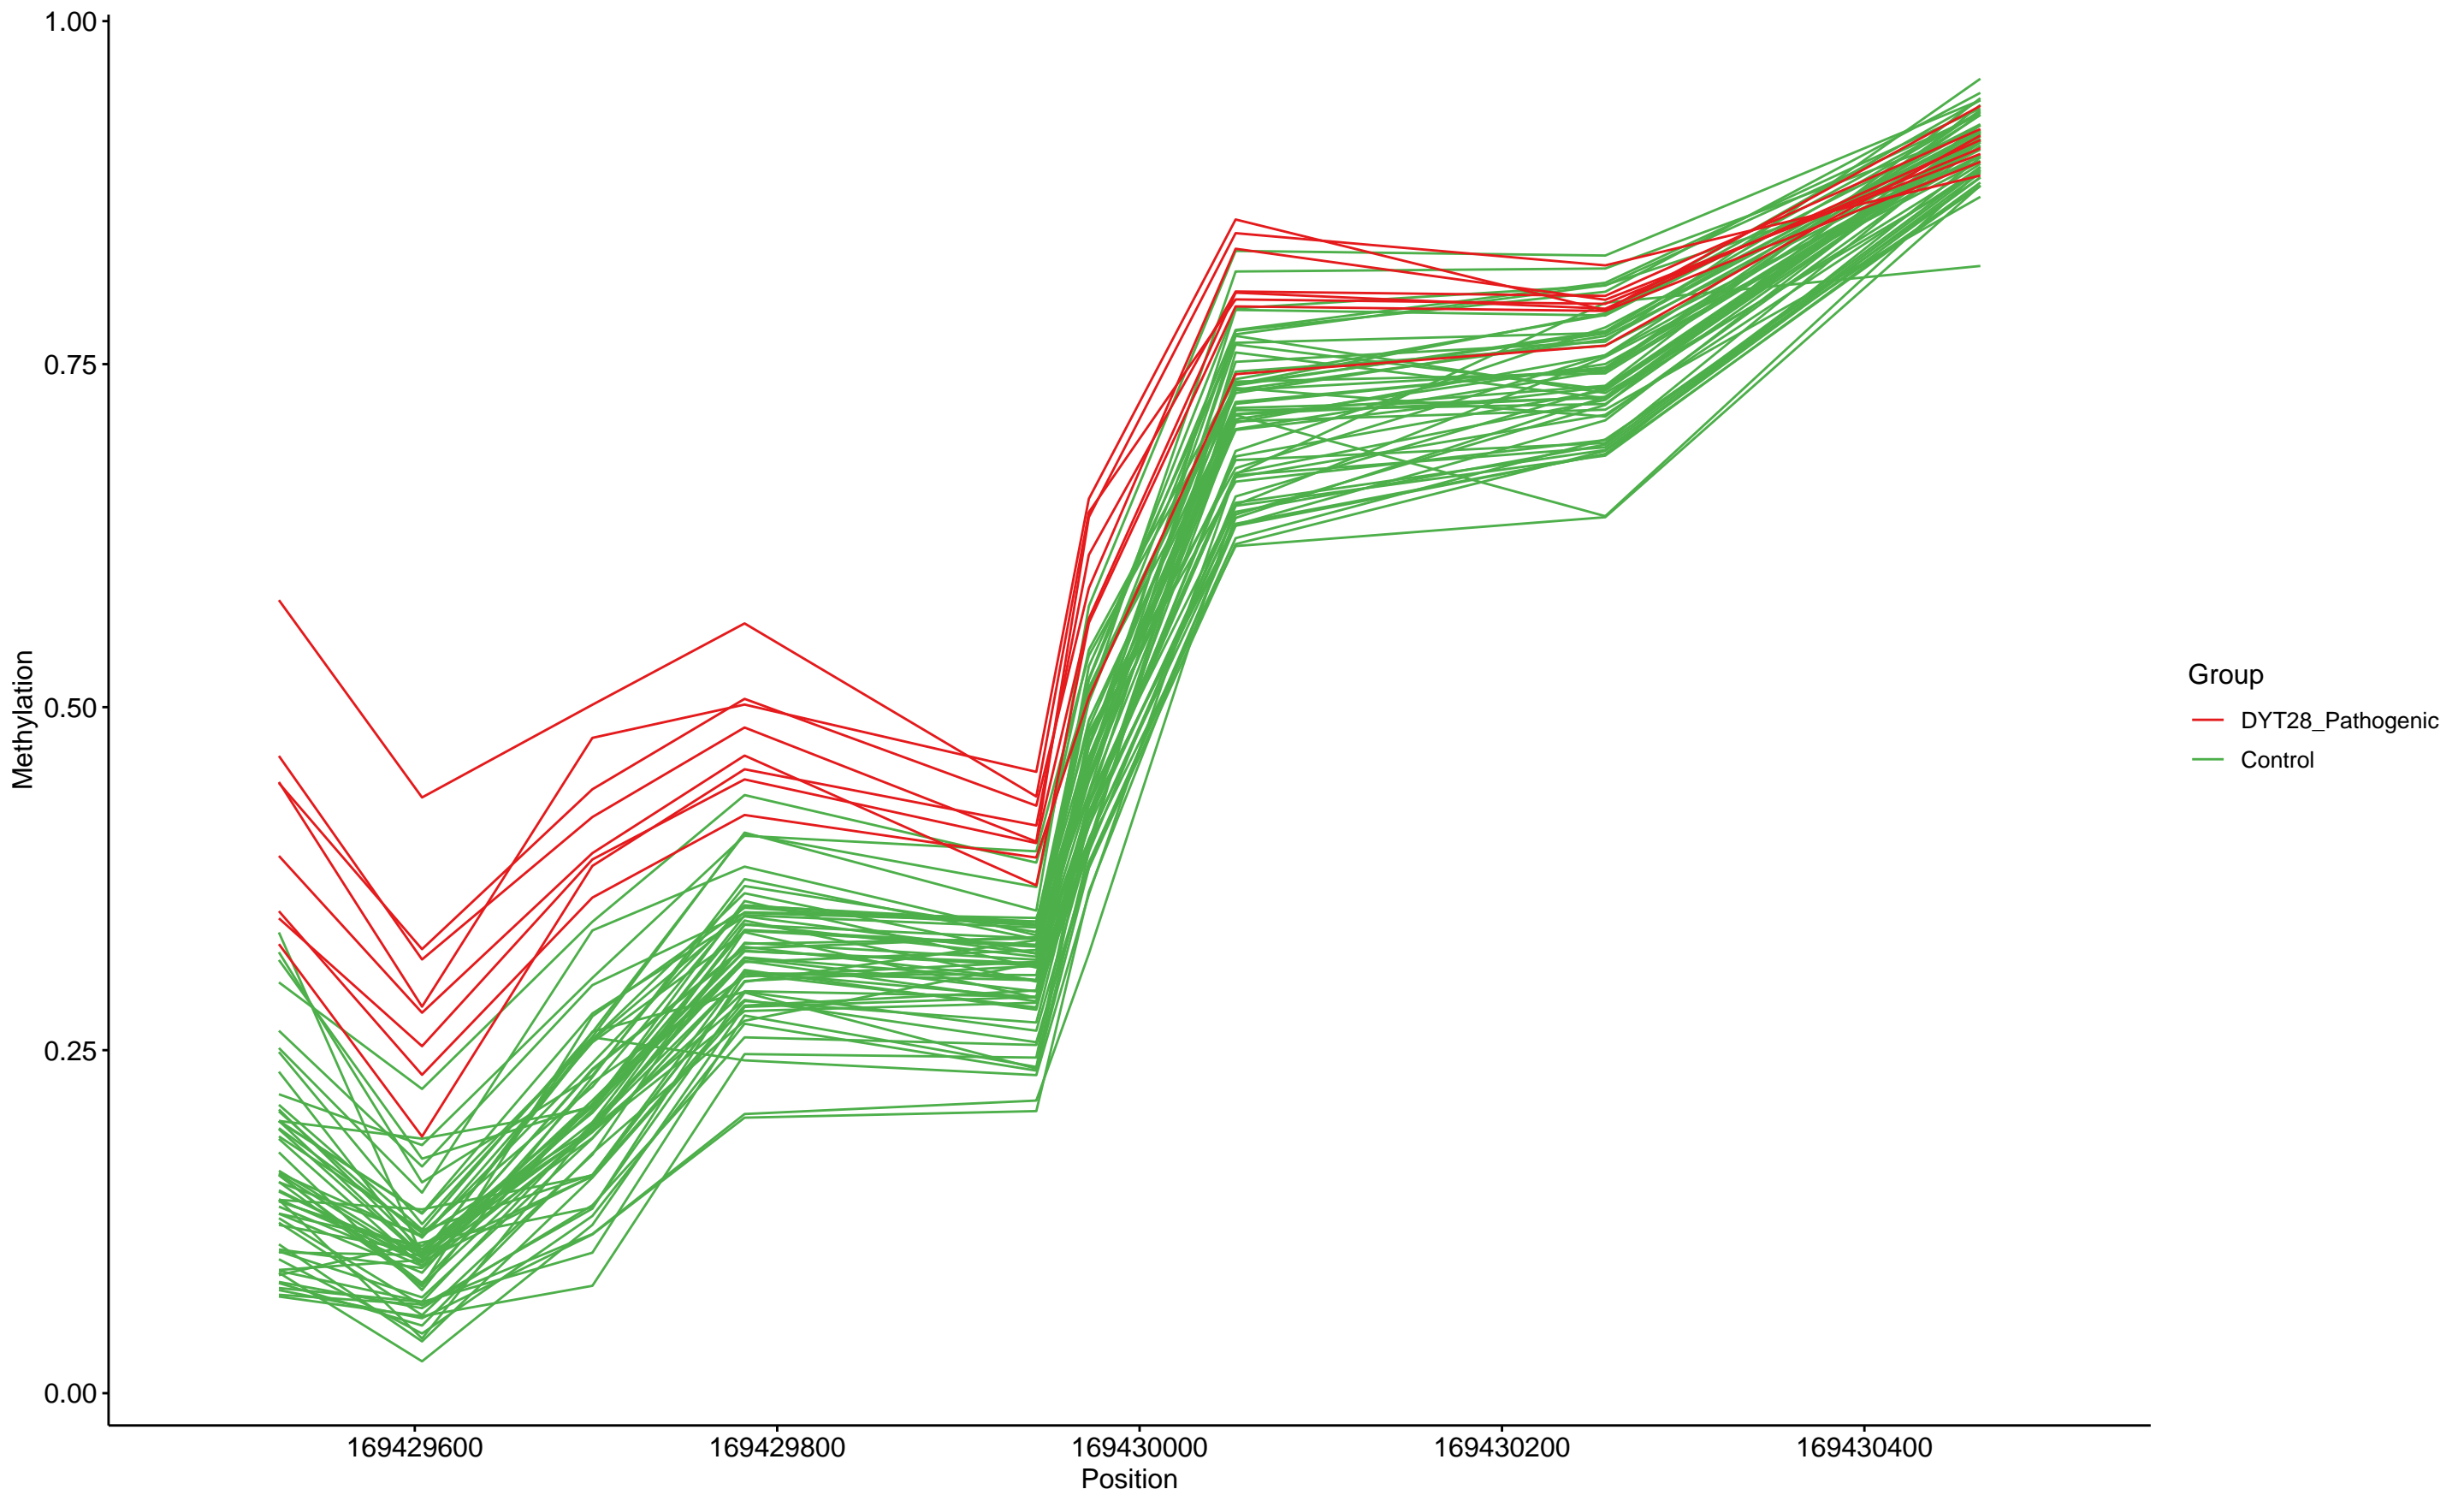



Region 57: chr20:35168979–35169886

Fisher: 6.50119421685279e-41

Stouffer: 1.11364929183172e-41

Mean difference: 0.118485370845826

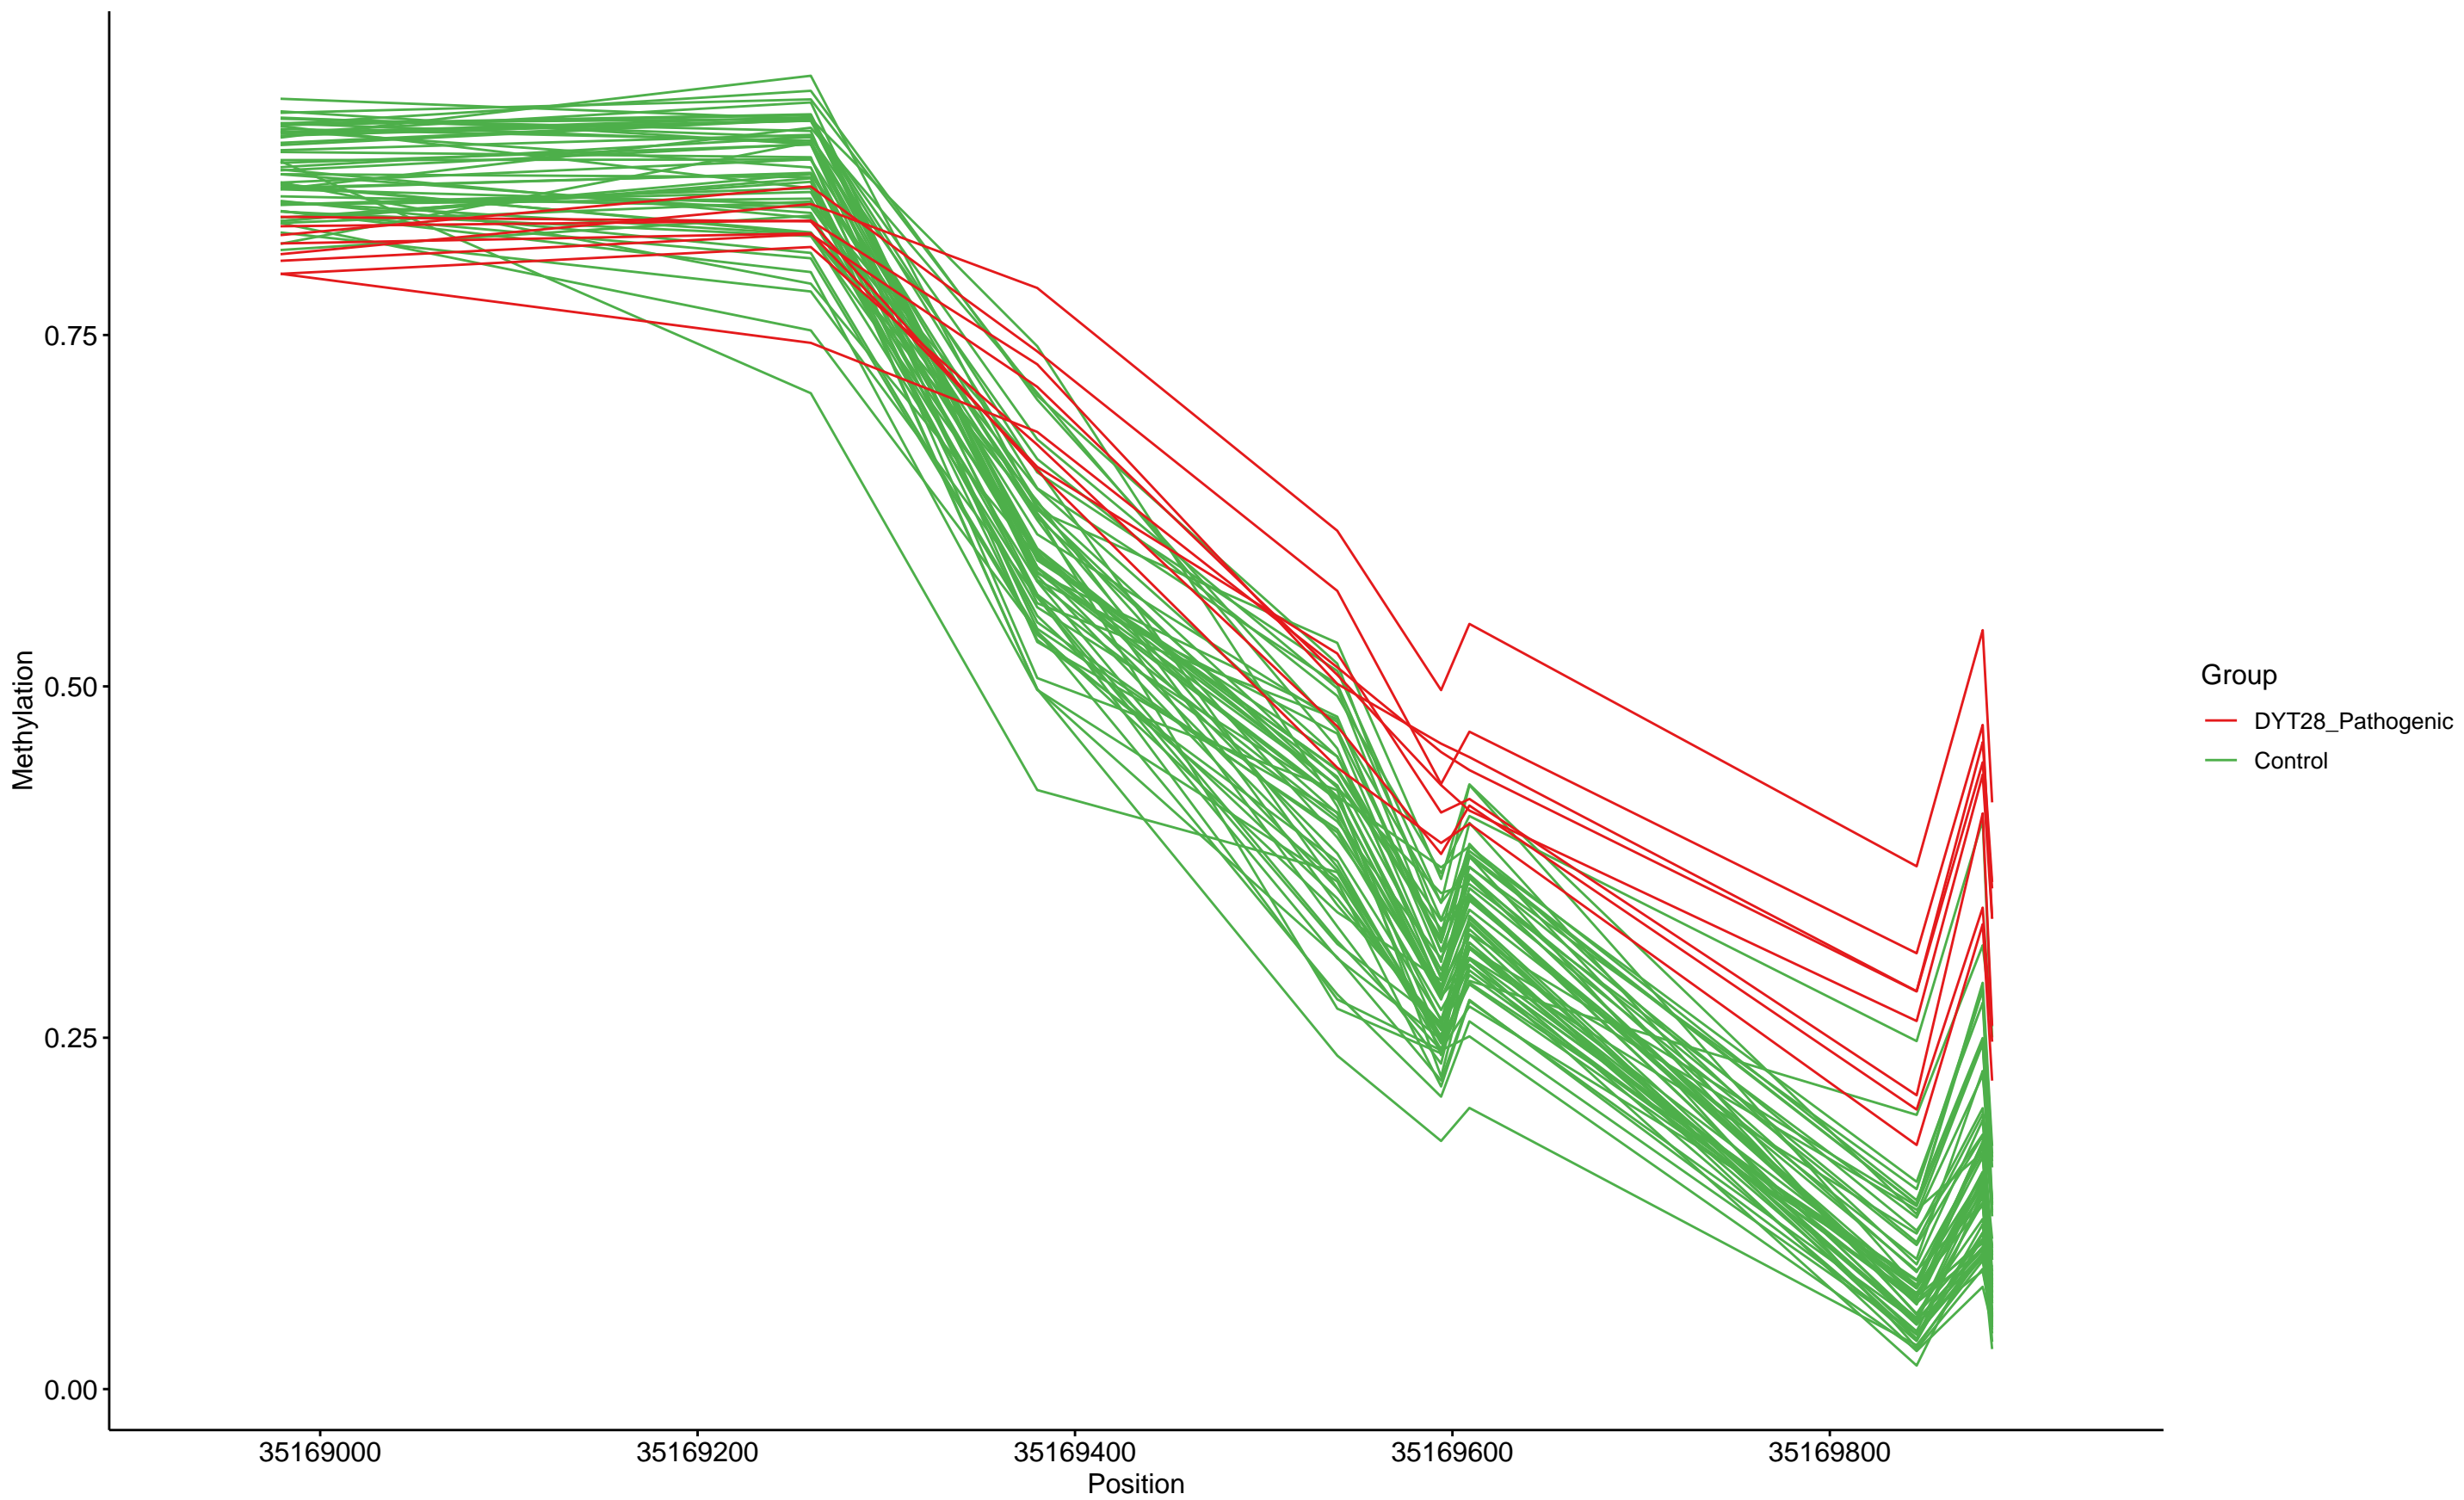

Region 58: chr14:74058370-74059170

Fisher: 2.80588722574989e-40

Stouffer: 8.56325330306994e-41

Mean difference: 0.114786425602605

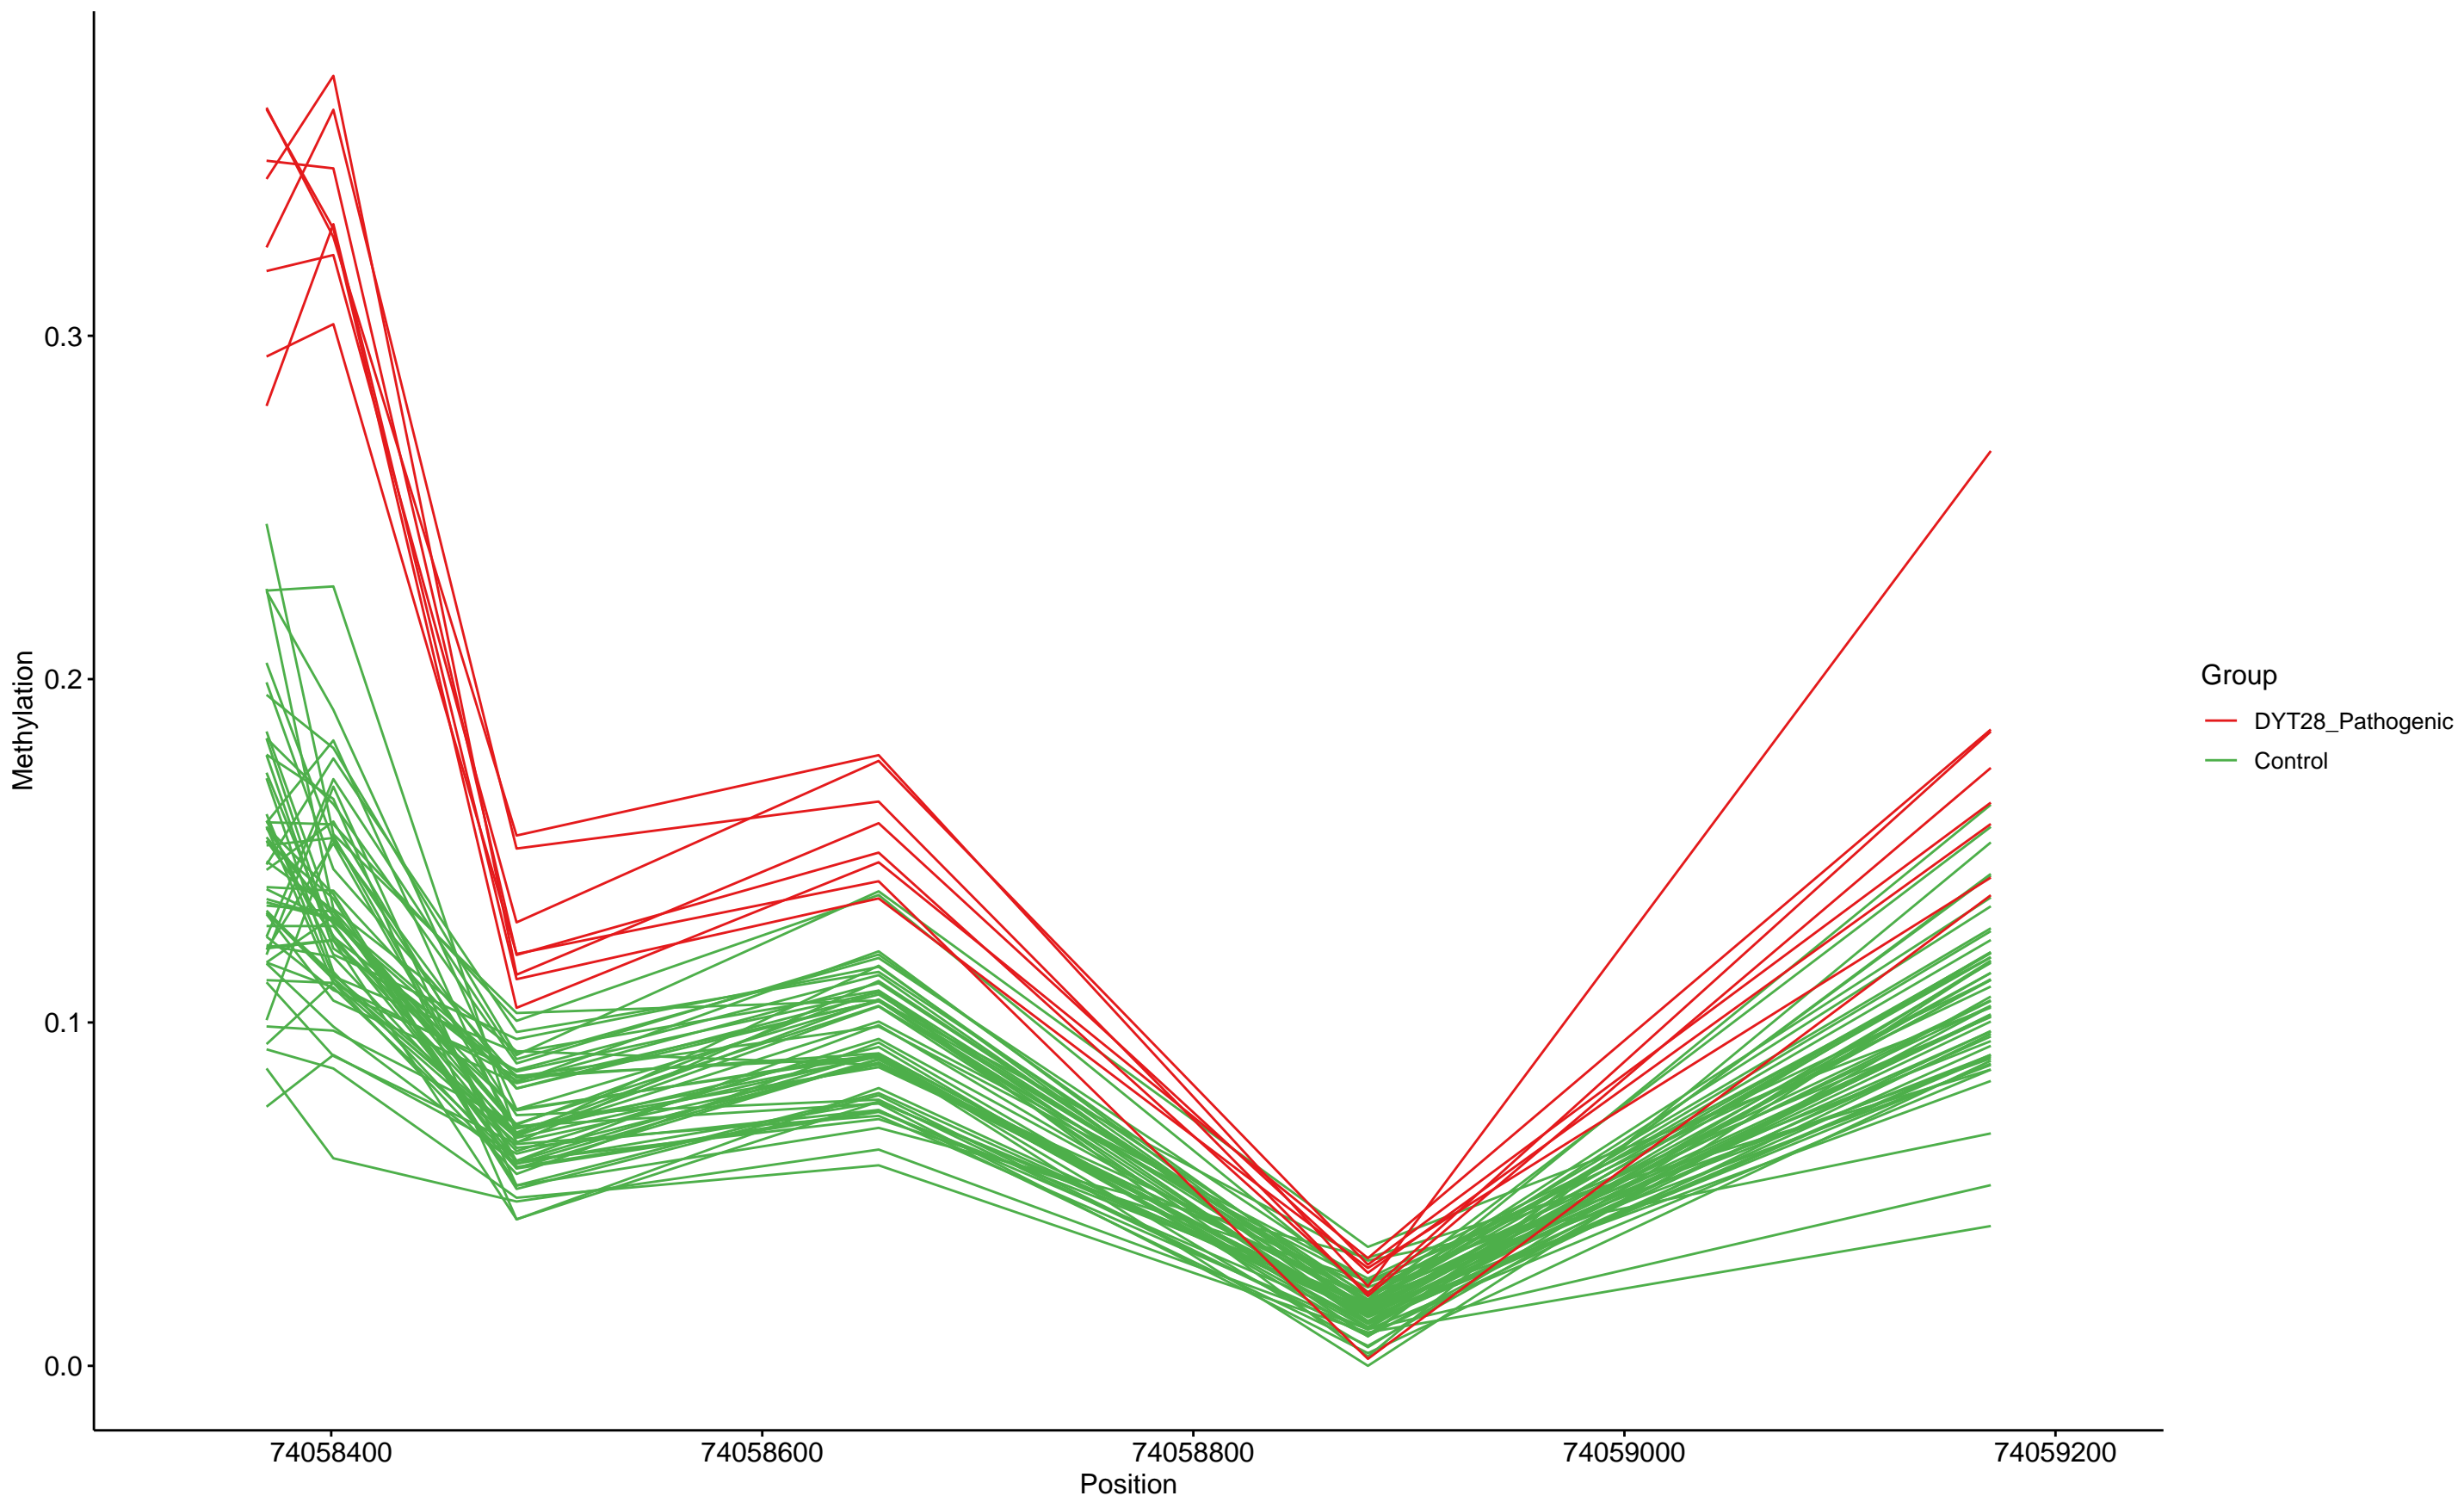

Region 59: chr5:76372556–76373803

Fisher:  $7.26259438726627e-39$

Stouffer:  $4.61439724131851e-36$

Mean difference: 0.166909860545208

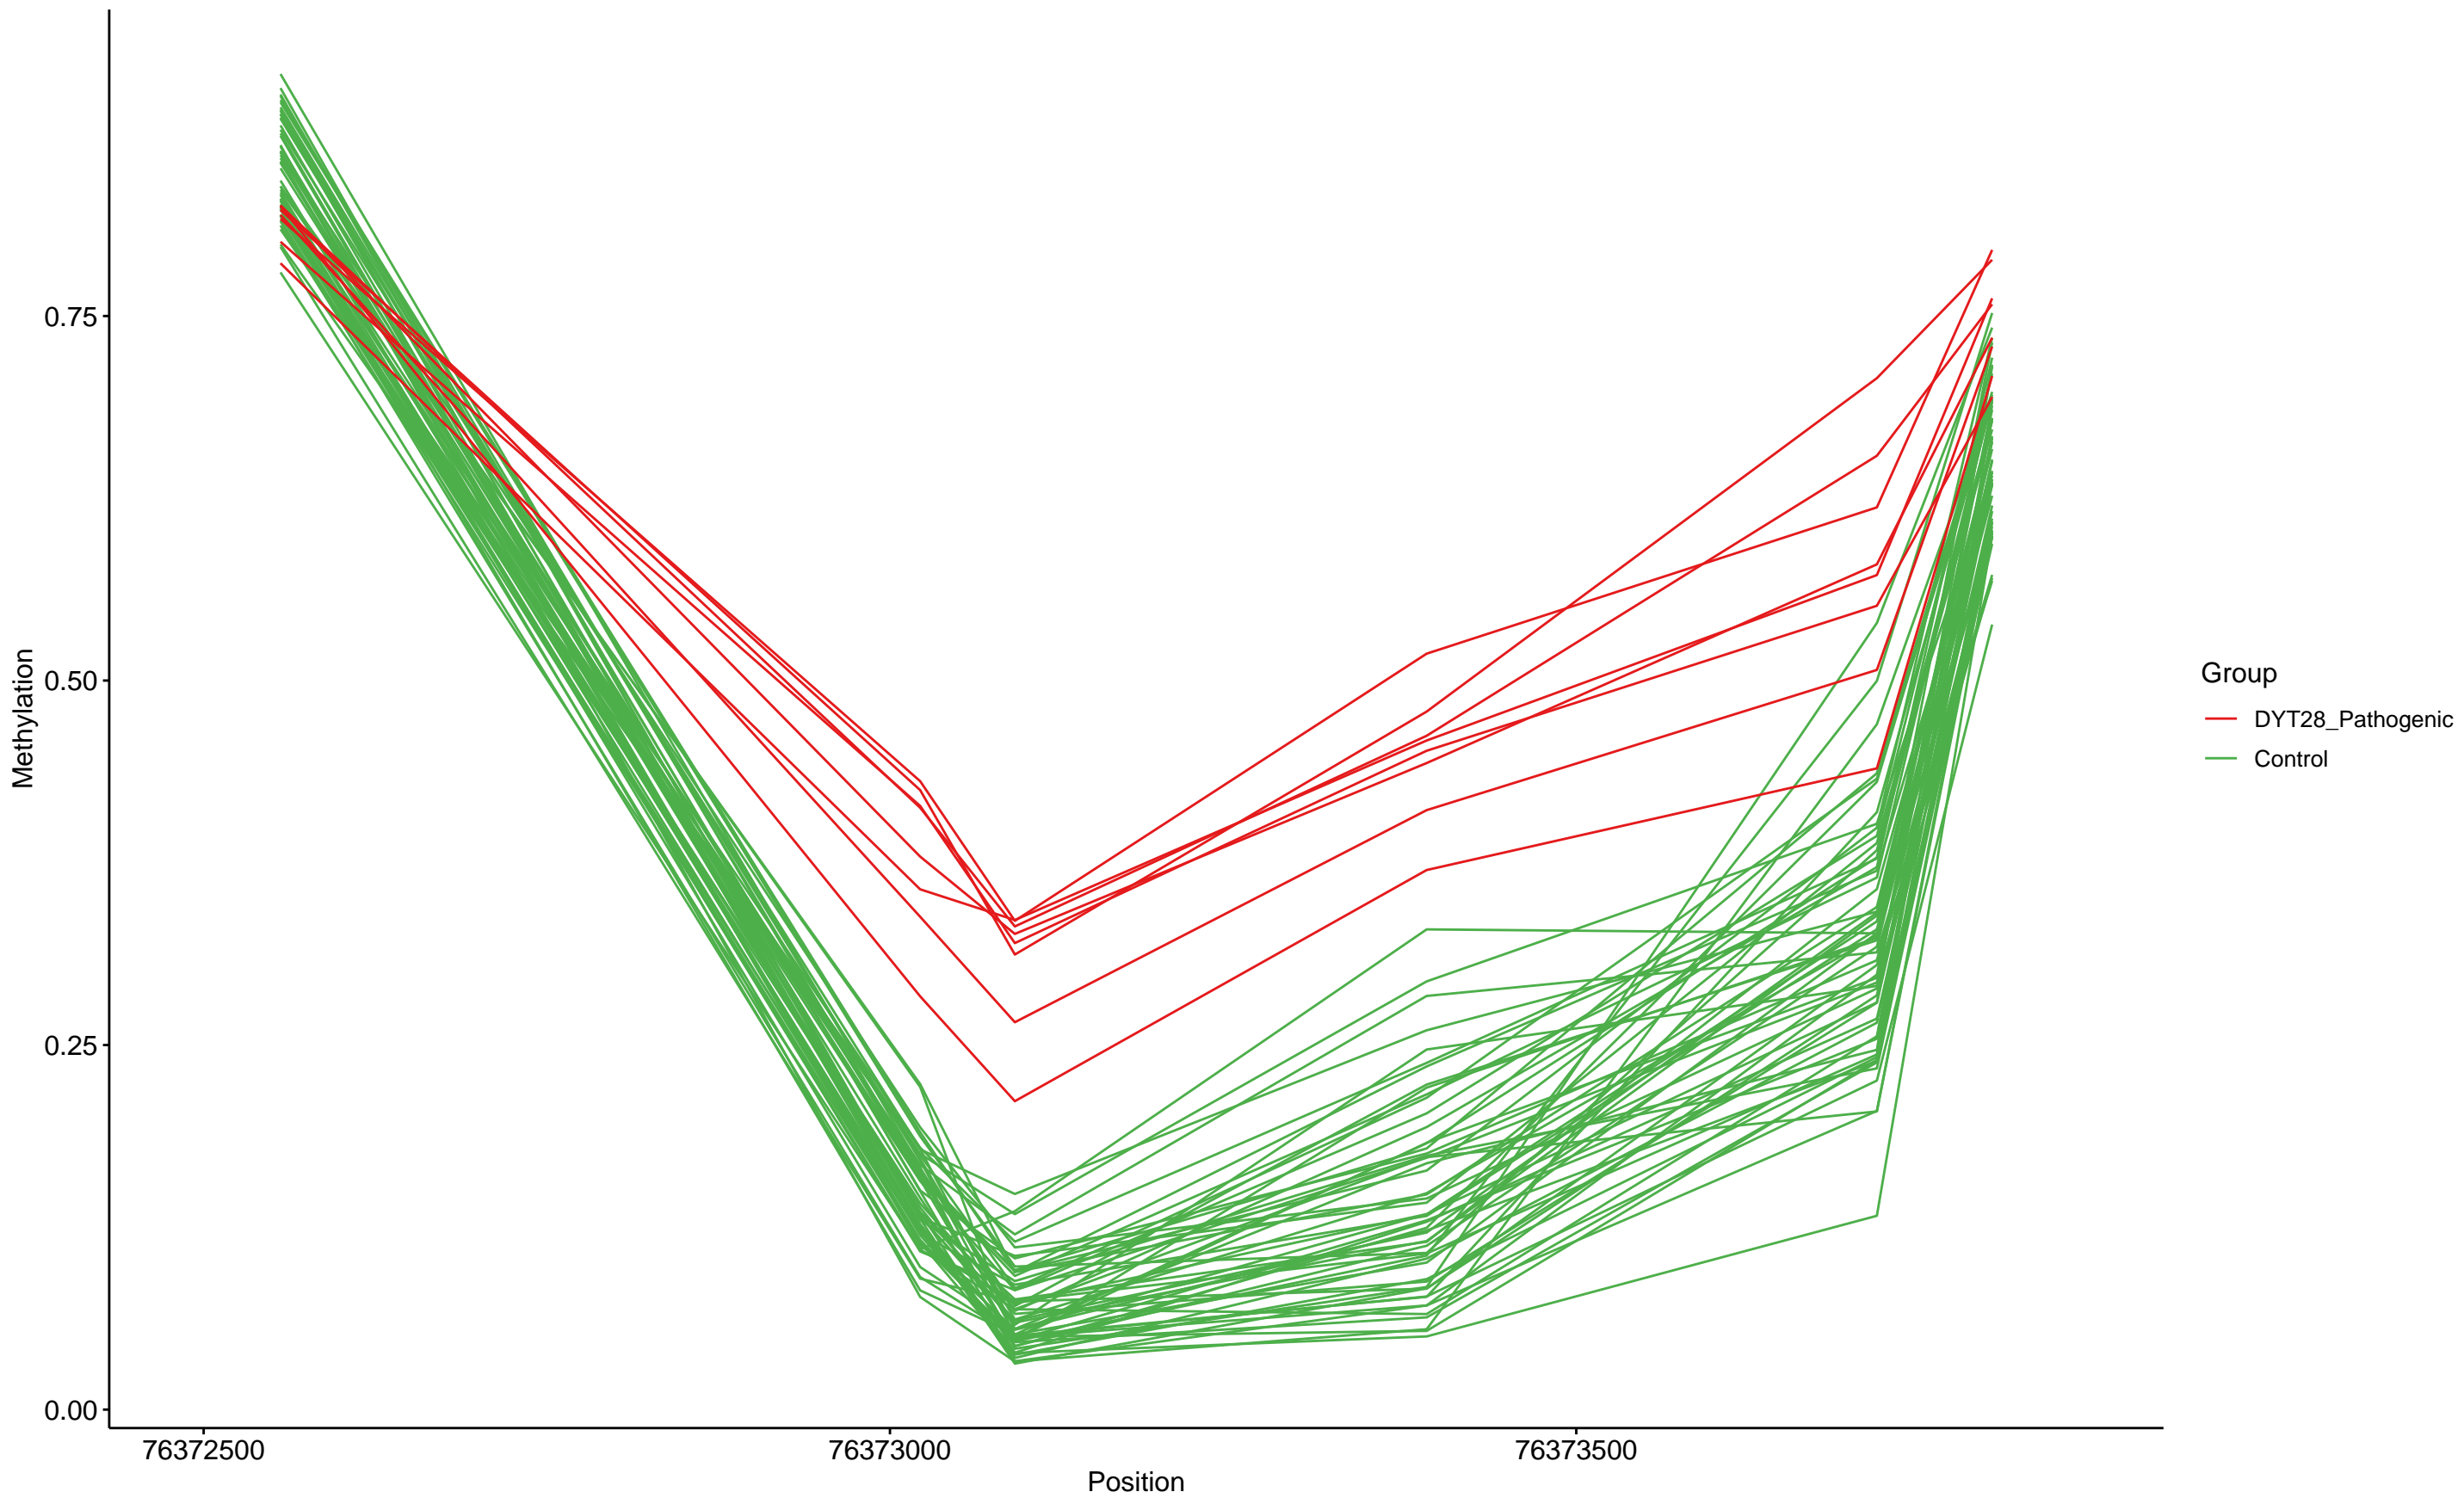

Region 60: chr6:144416220-144418218

Fisher: 1.20686257185167e-38

Stouffer: 5.50474809588906e-18

Mean difference: 0.108126350420021

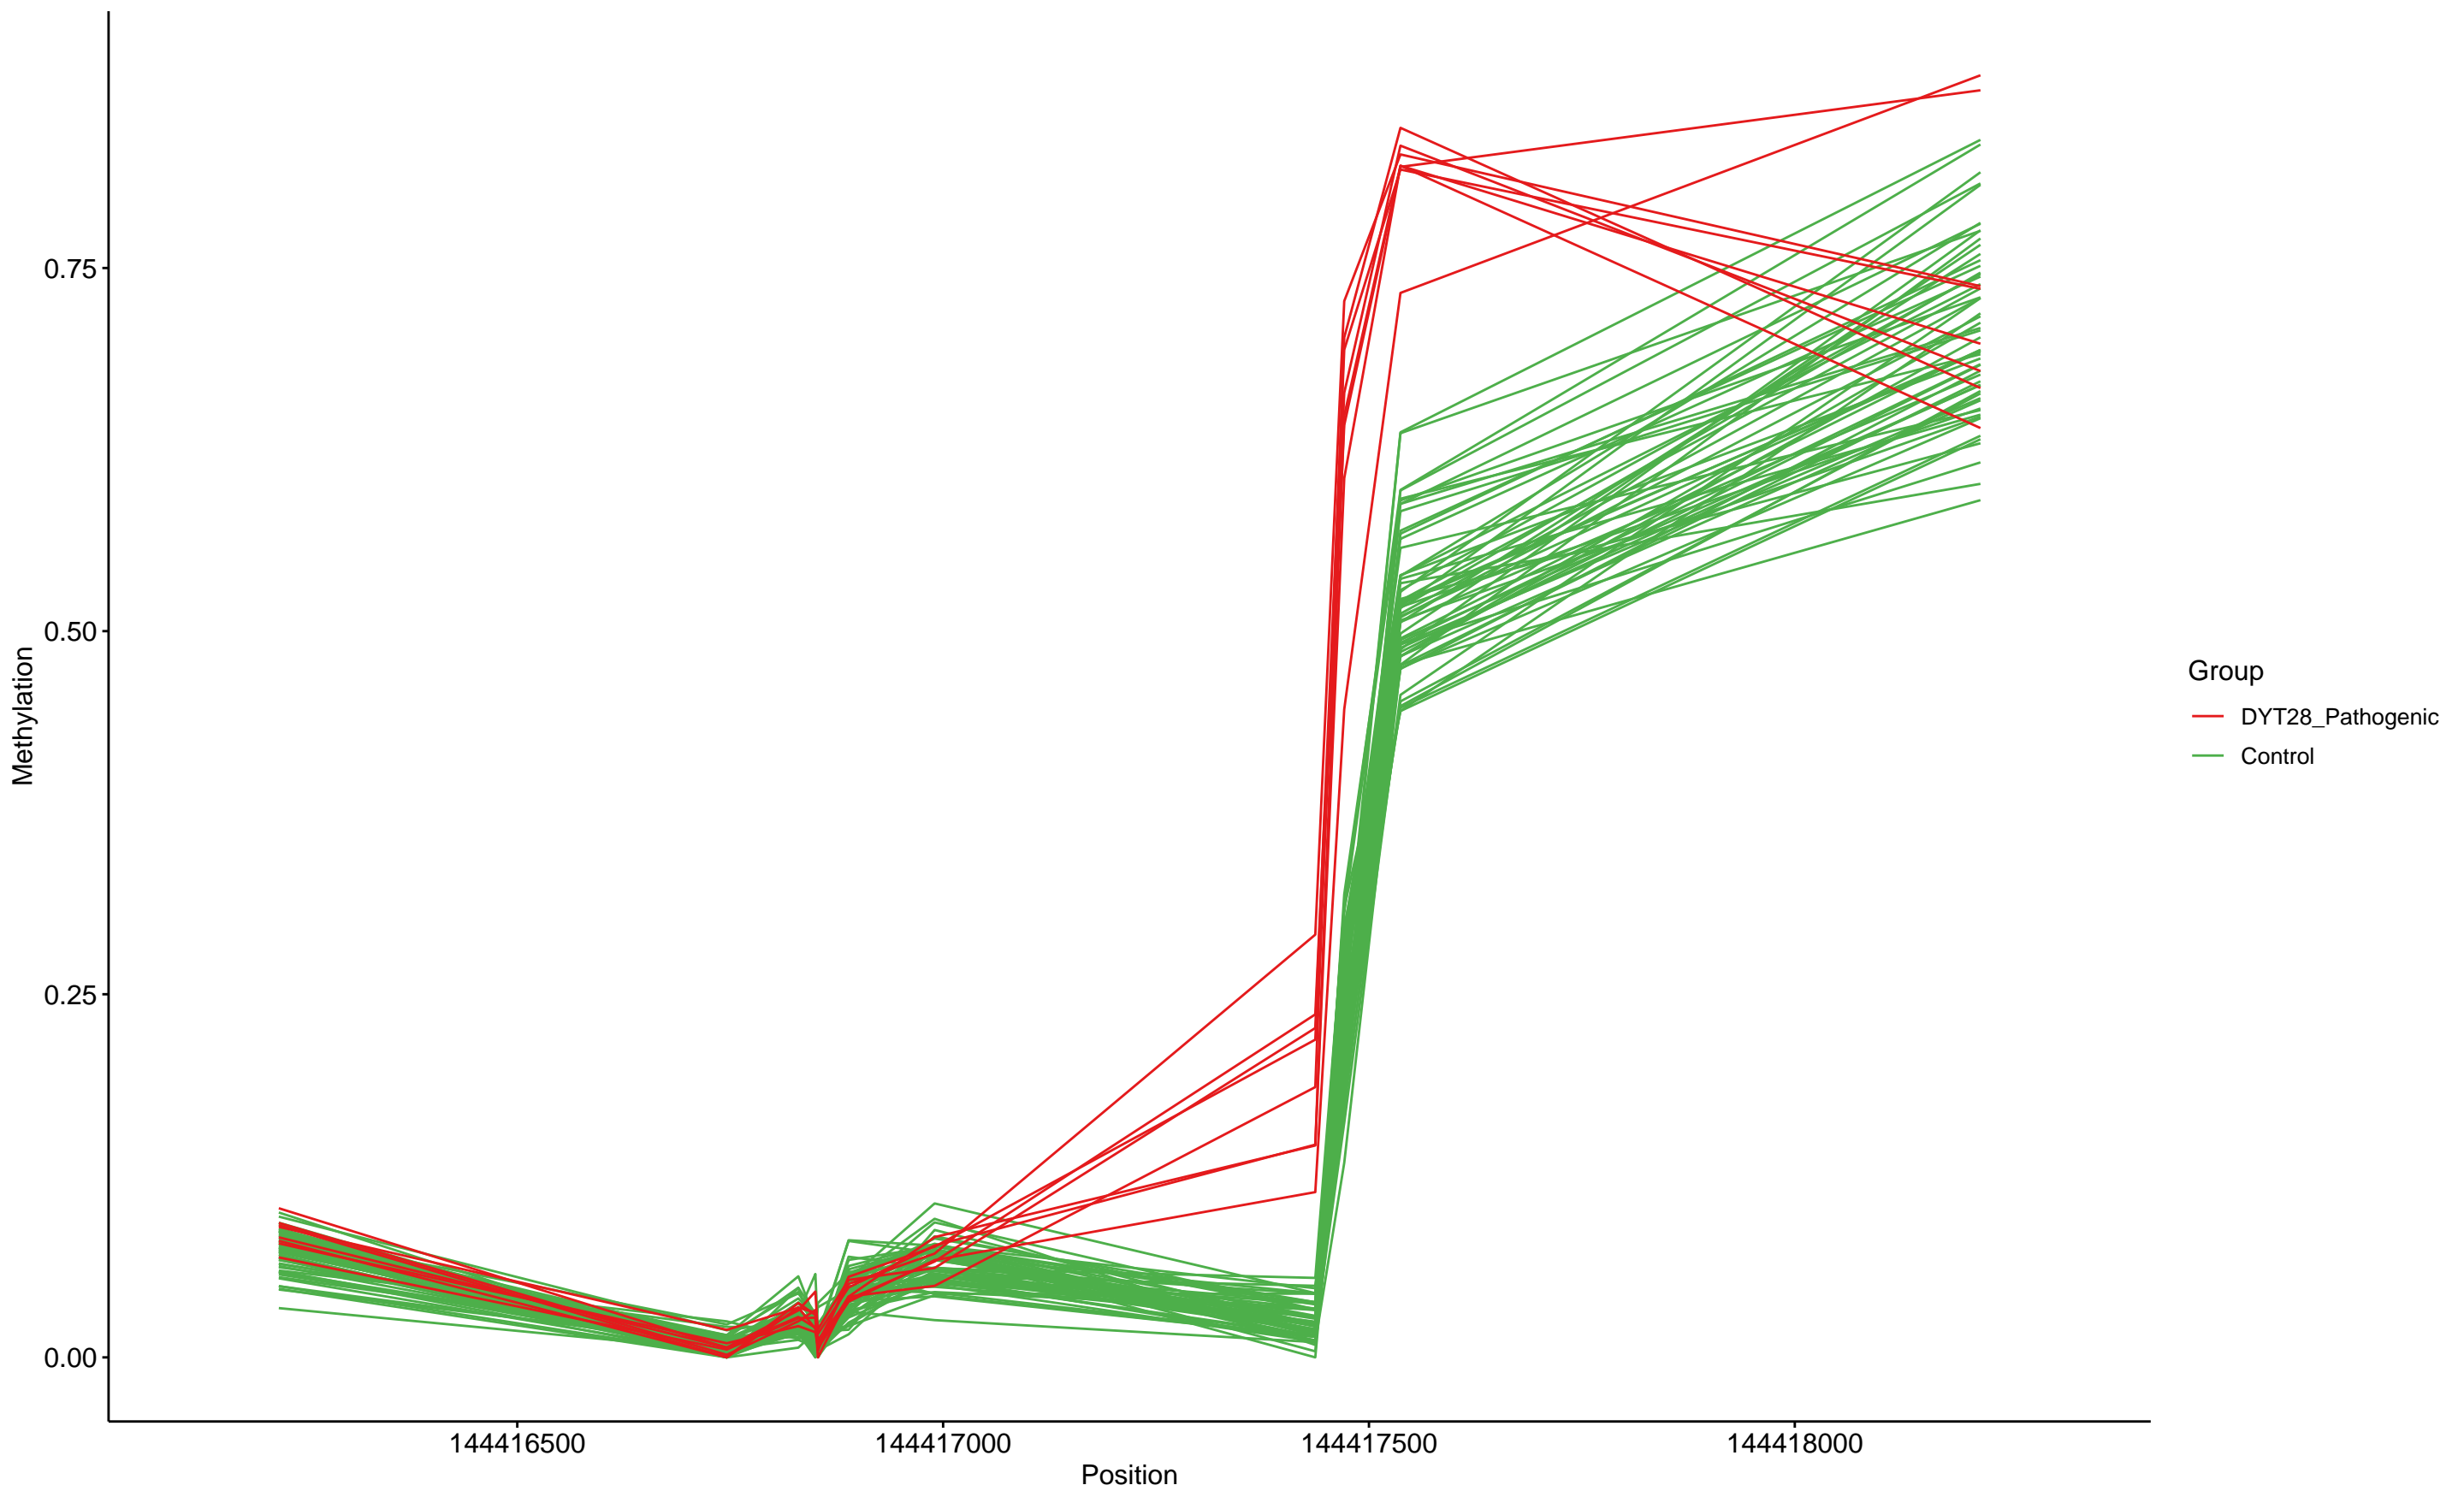



Region 61: chr7:156400281-156401919

Fisher: 1.34194531611163e-38

Stouffer: 3.38160657603539e-40

Mean difference: 0.204640061605036

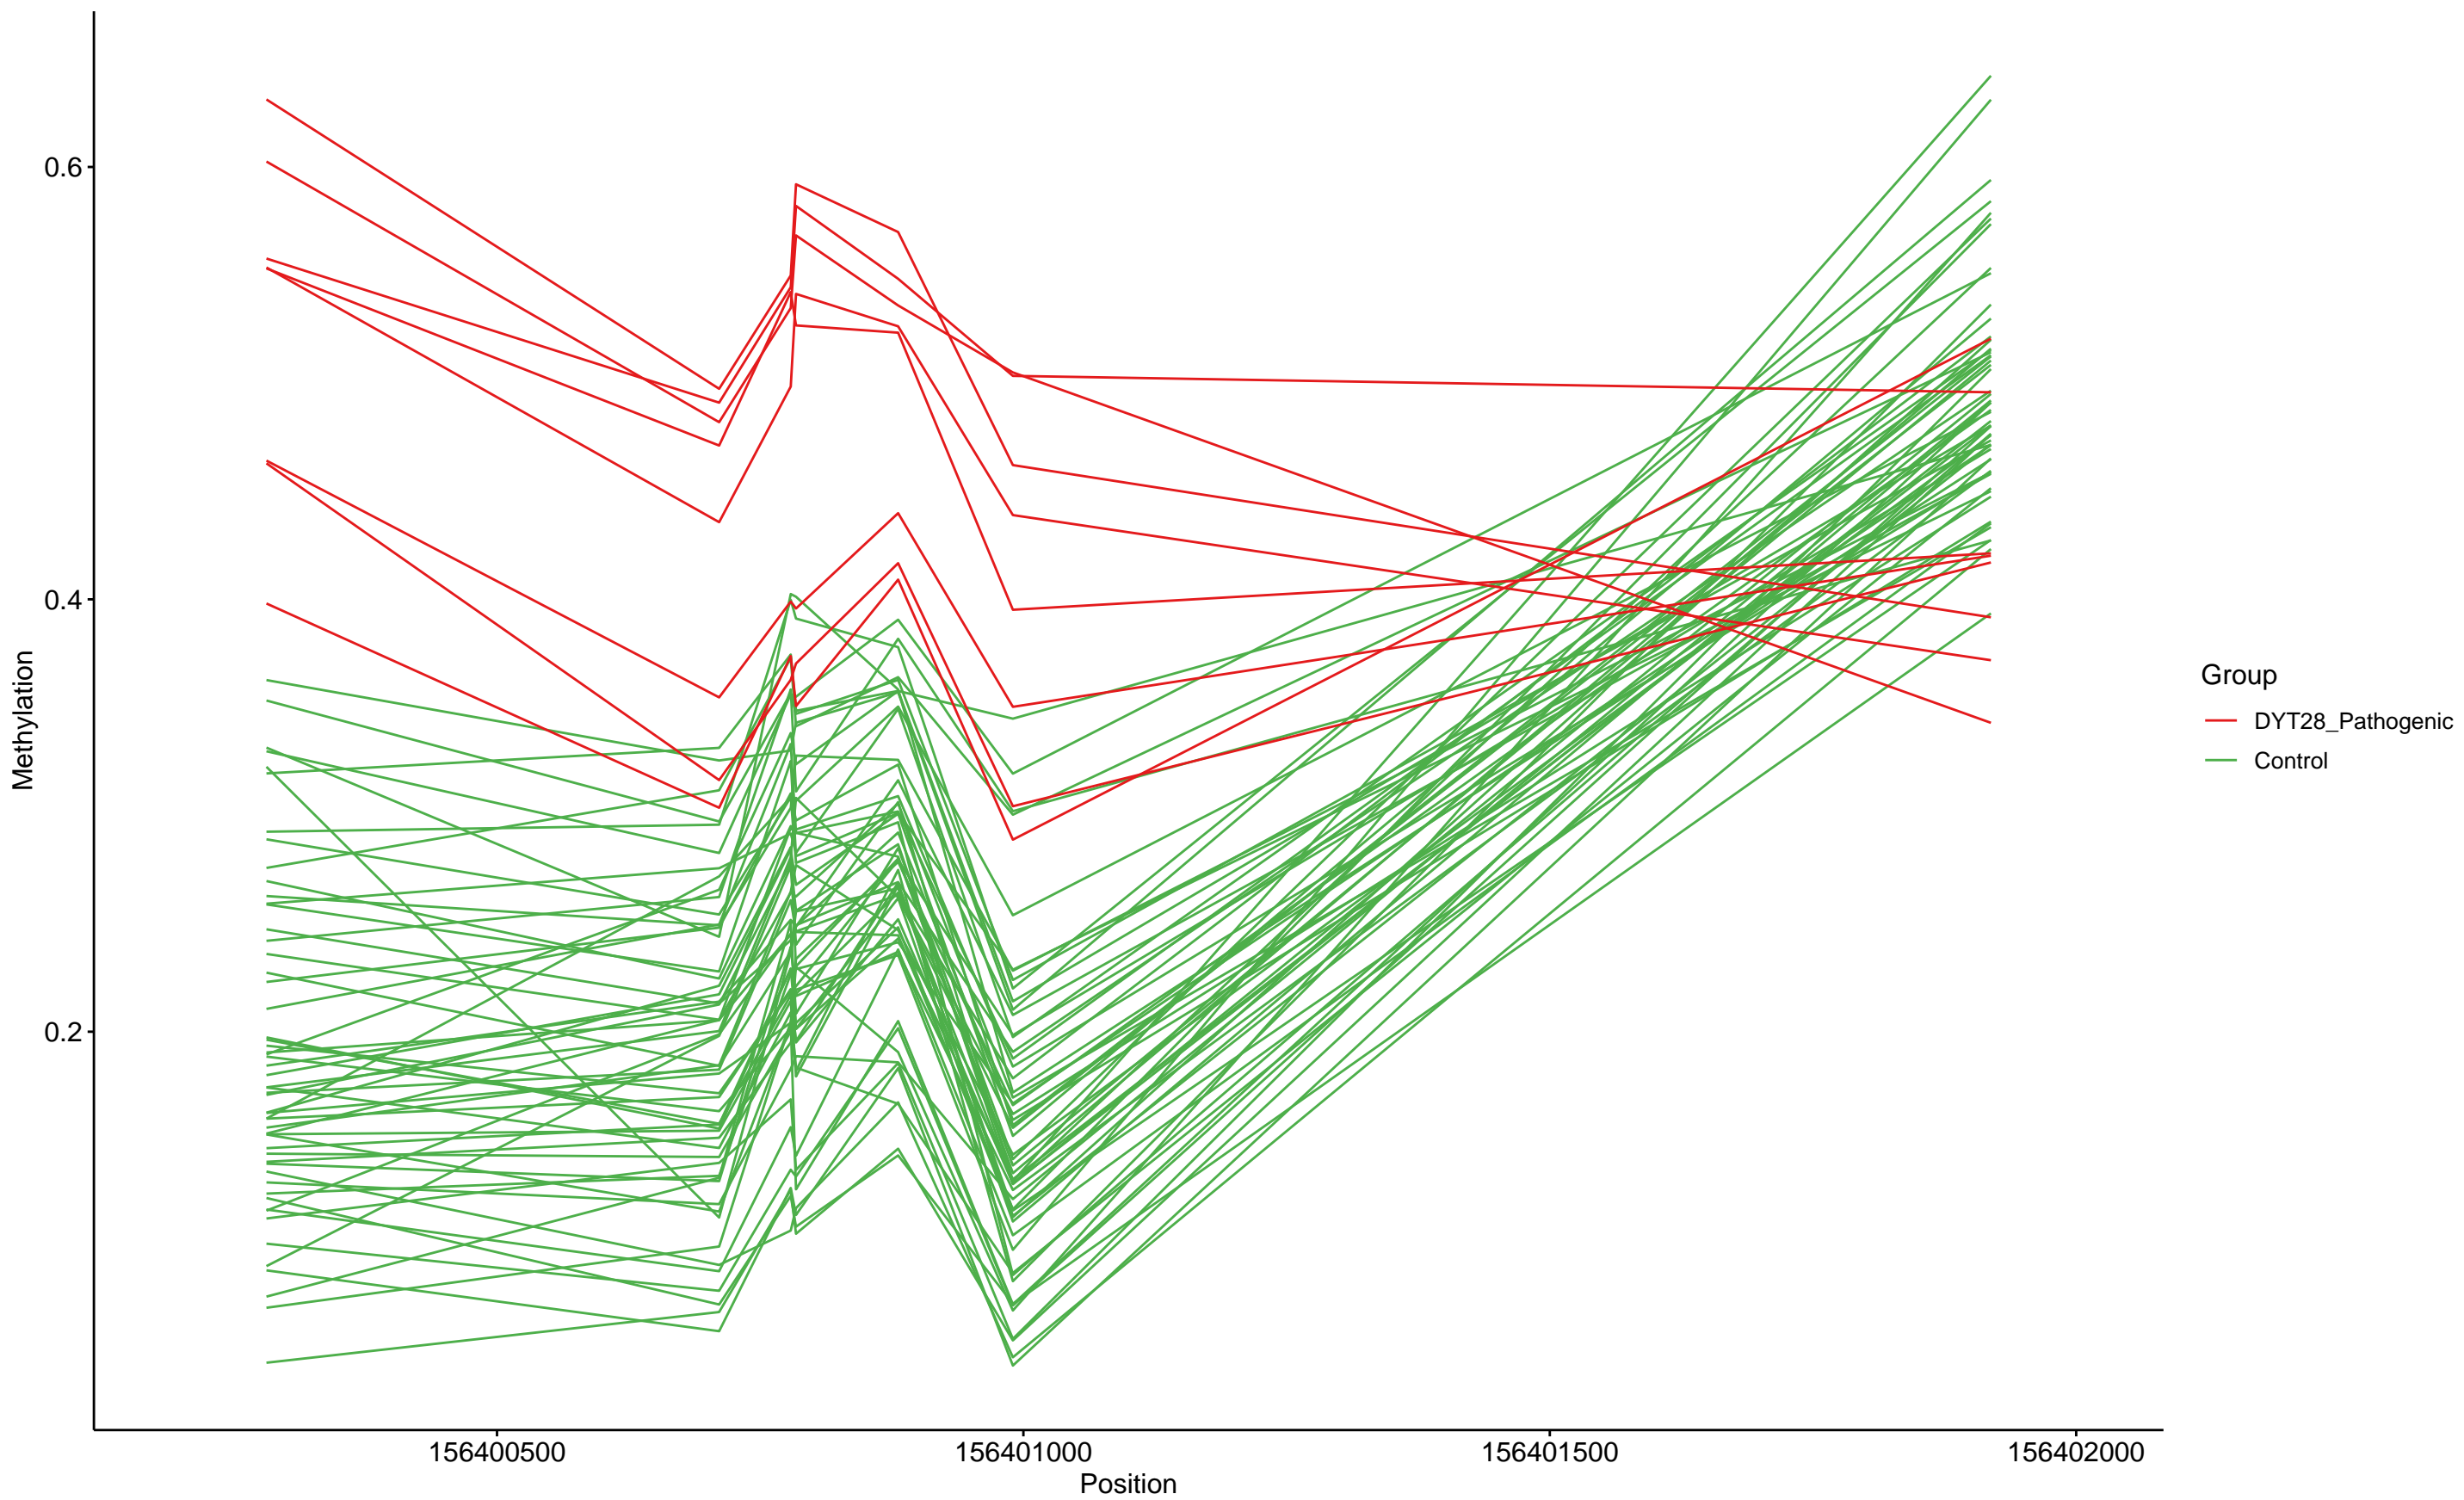

Region 62: chr15:45996521-45998079

Fisher: 1.63548388935748e-37

Stouffer: 8.4440799241222e-36

Mean difference: 0.105660254157905

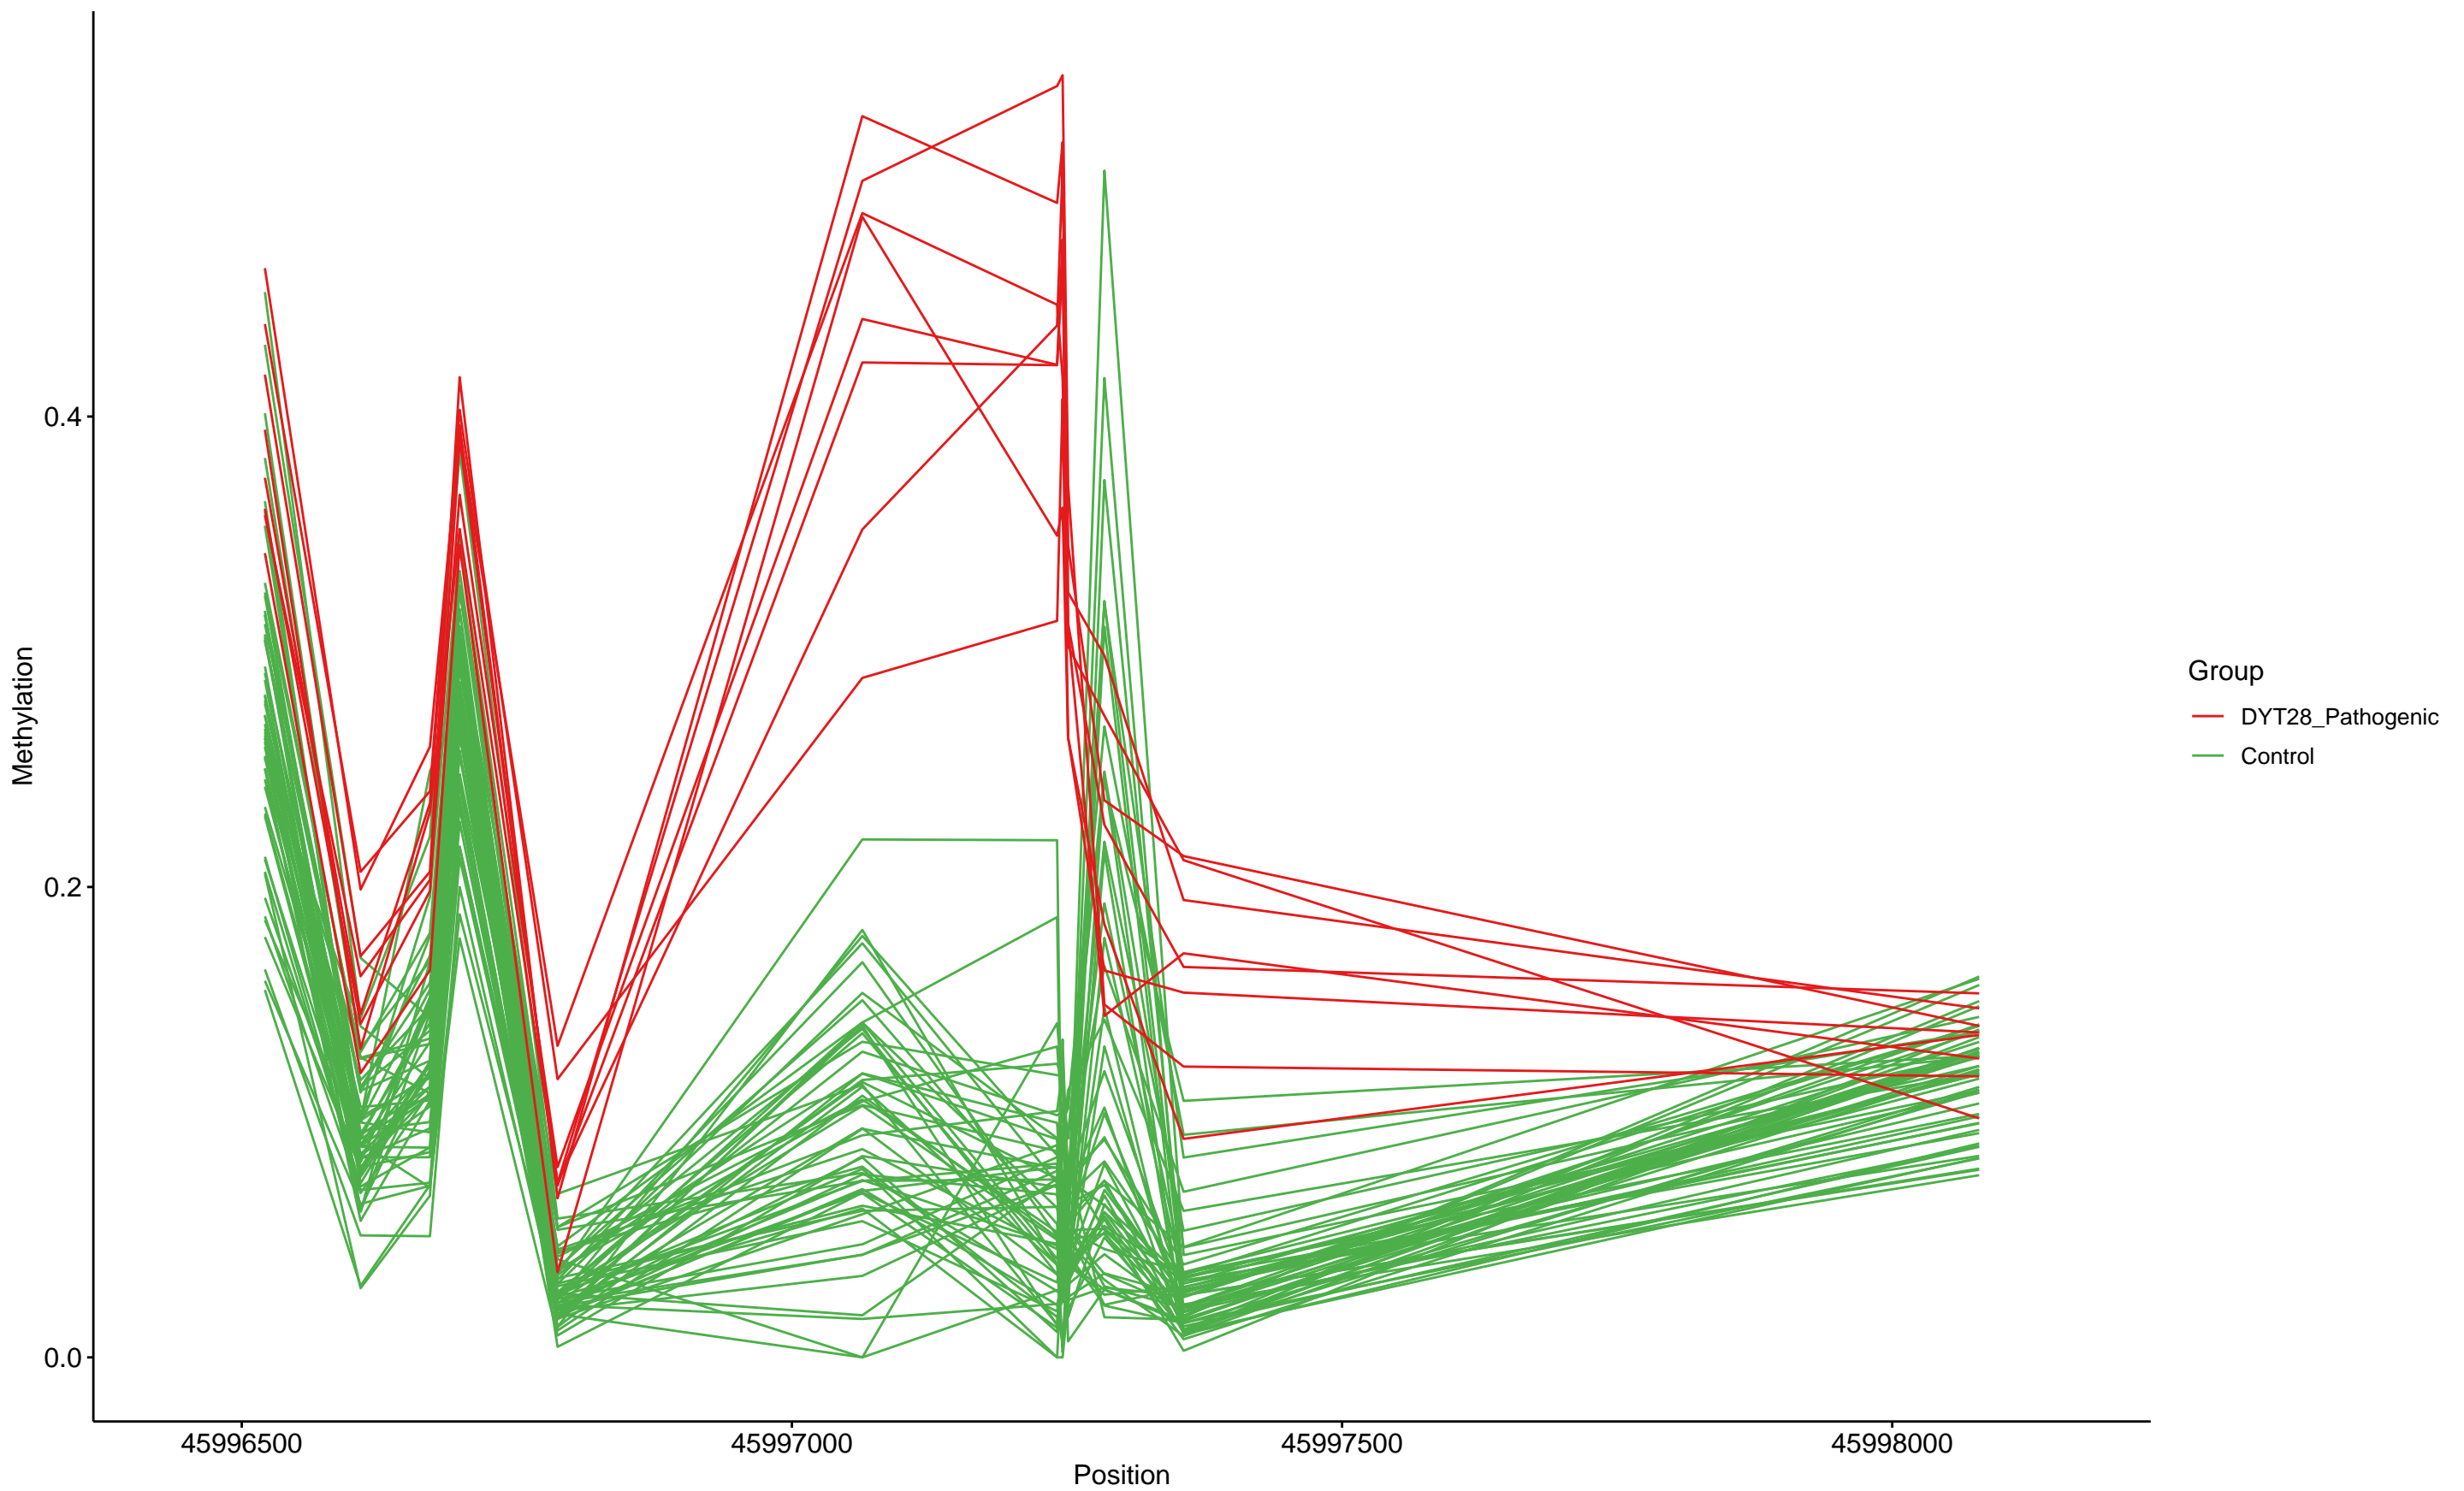

Region 63: chr6:112687964–112688930

Fisher: 4.46714809155581e-37

Stouffer: 1.48240708098266e-32

Mean difference: 0.147388027127757

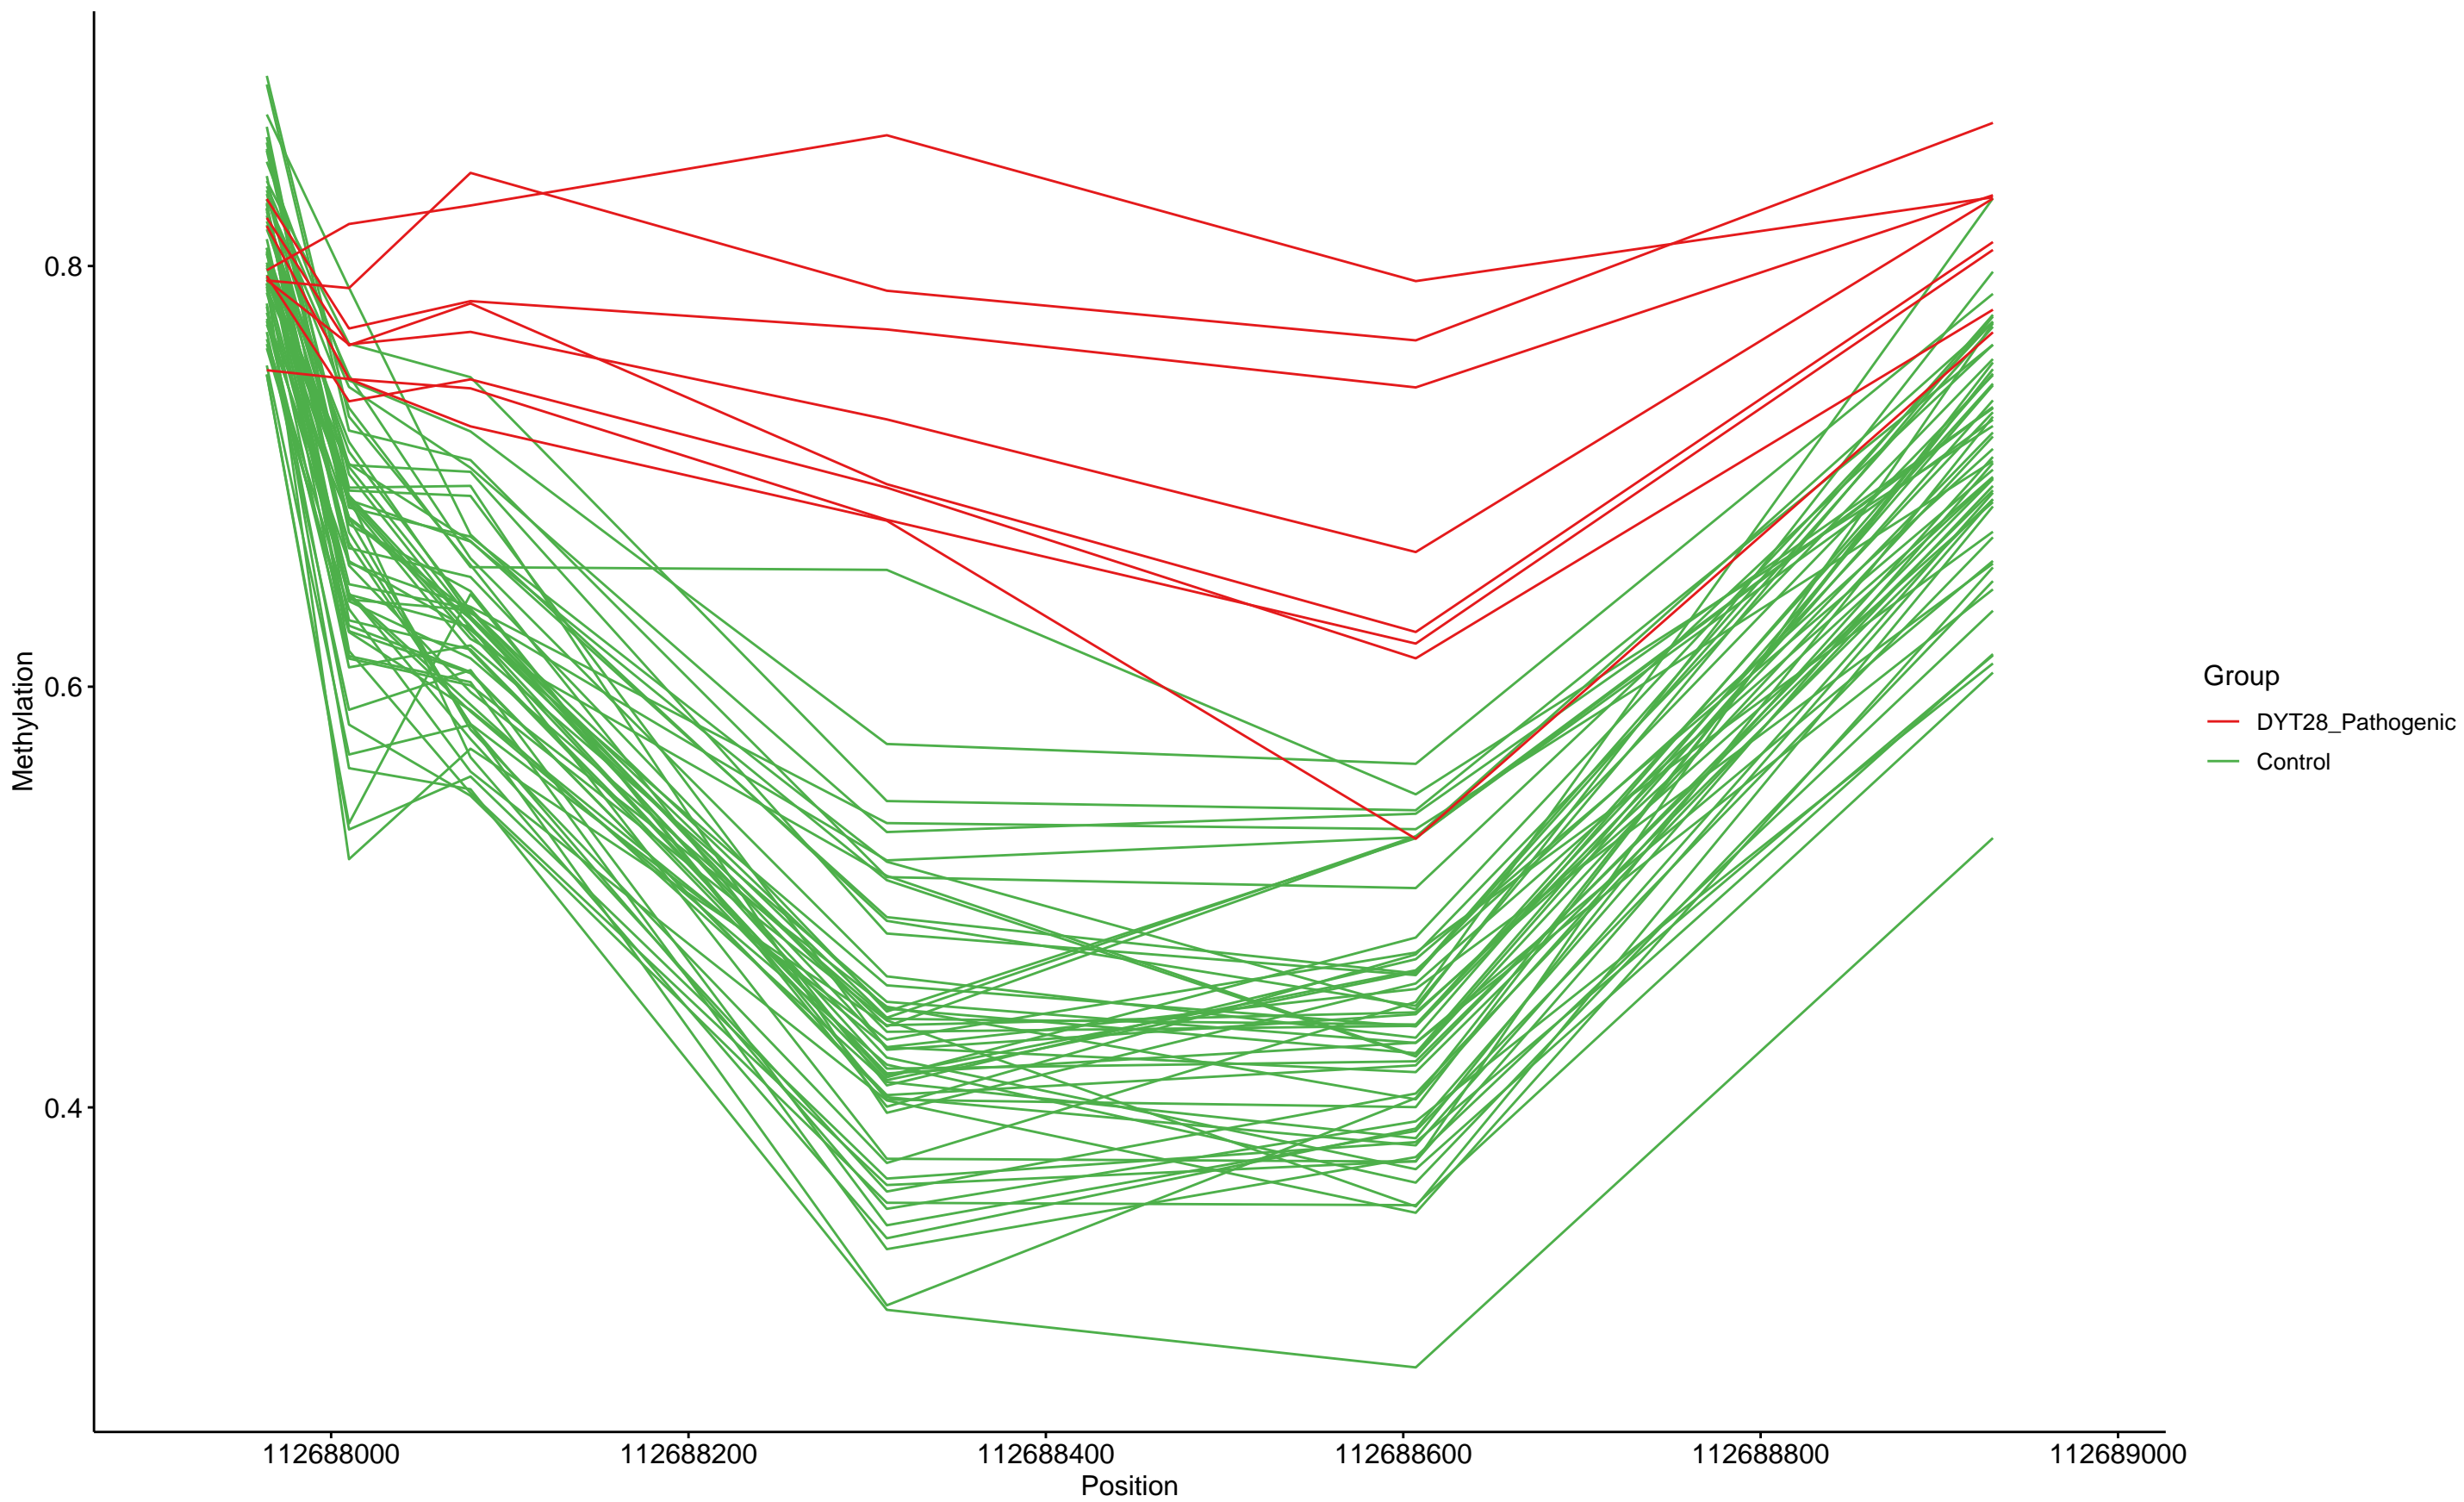



Region 64: chr19:48946564–48948880

Fisher: 5.71793510908288e-37

Stouffer: 7.08786140149124e-31

Mean difference: 0.120493933553082

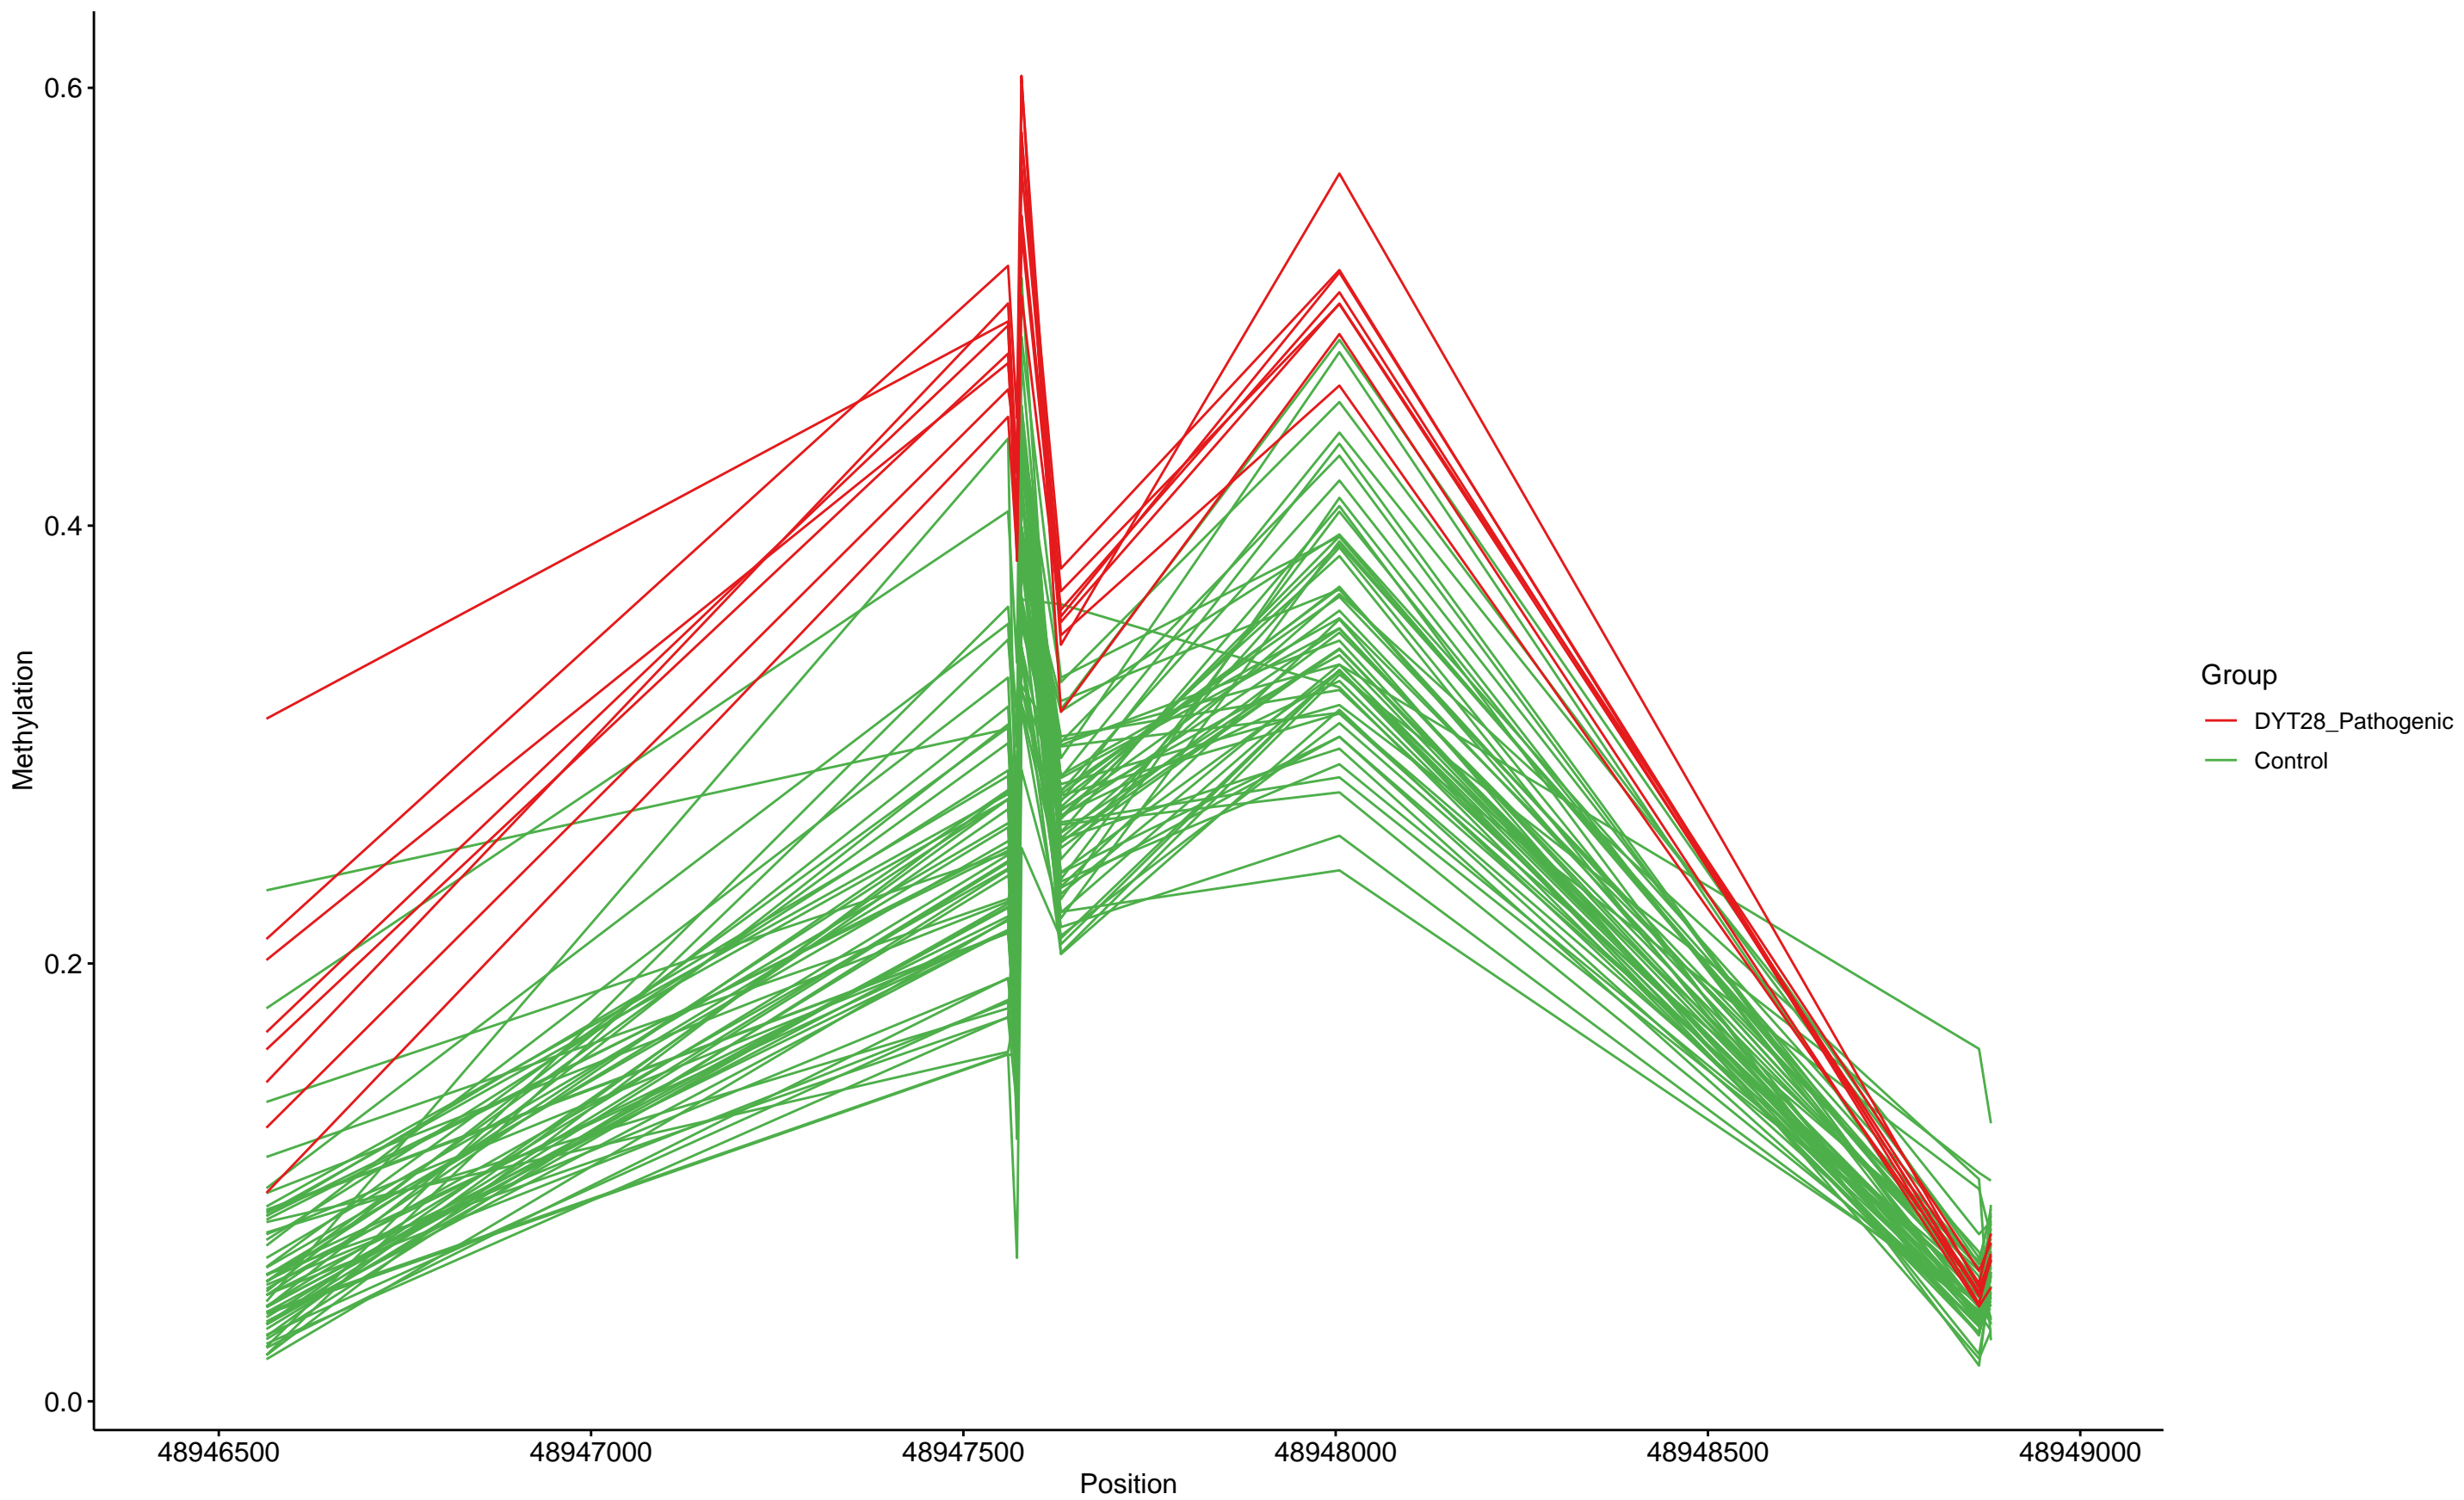



Region 65: chr12:125411780–125414015

Fisher:  $7.20782911668138e-37$

Stouffer:  $7.35060800088e-23$

Mean difference: 0.138392795683483

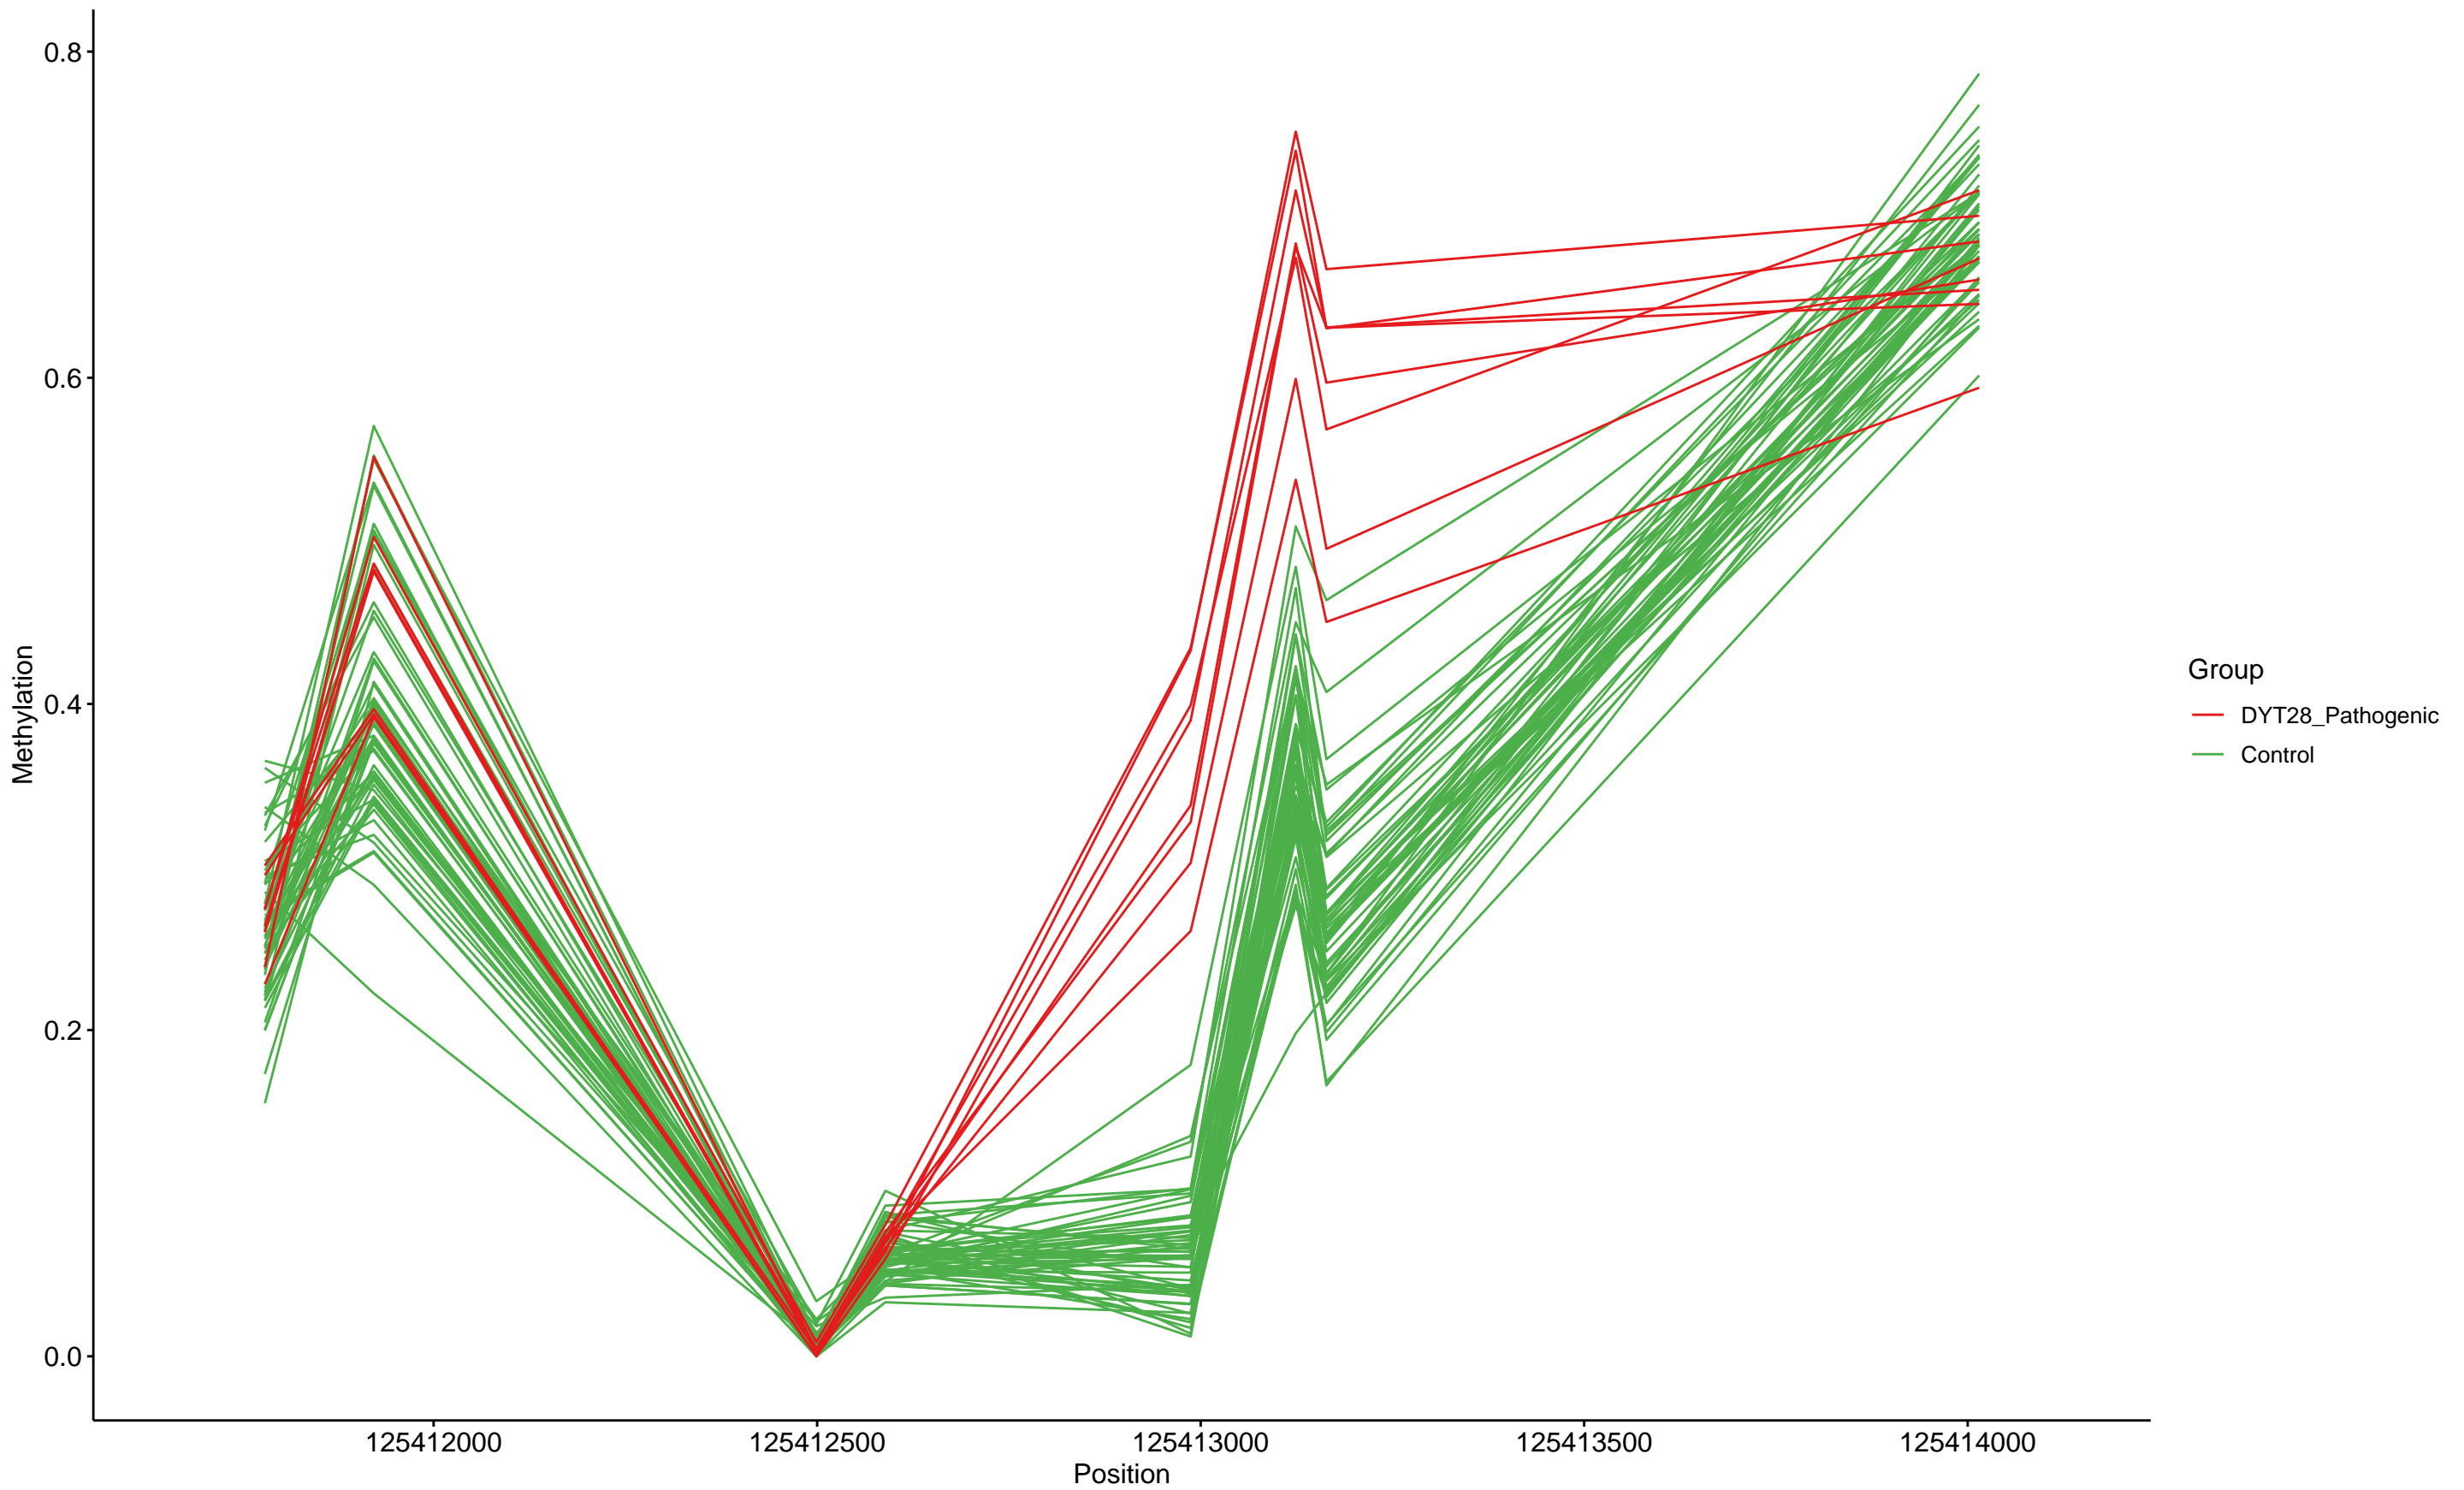

Region 66: chr18:14747082-14748439

Fisher: 1.32330652907332e-36

Stouffer: 4.748155688846e-38

Mean difference: 0.122065412924441

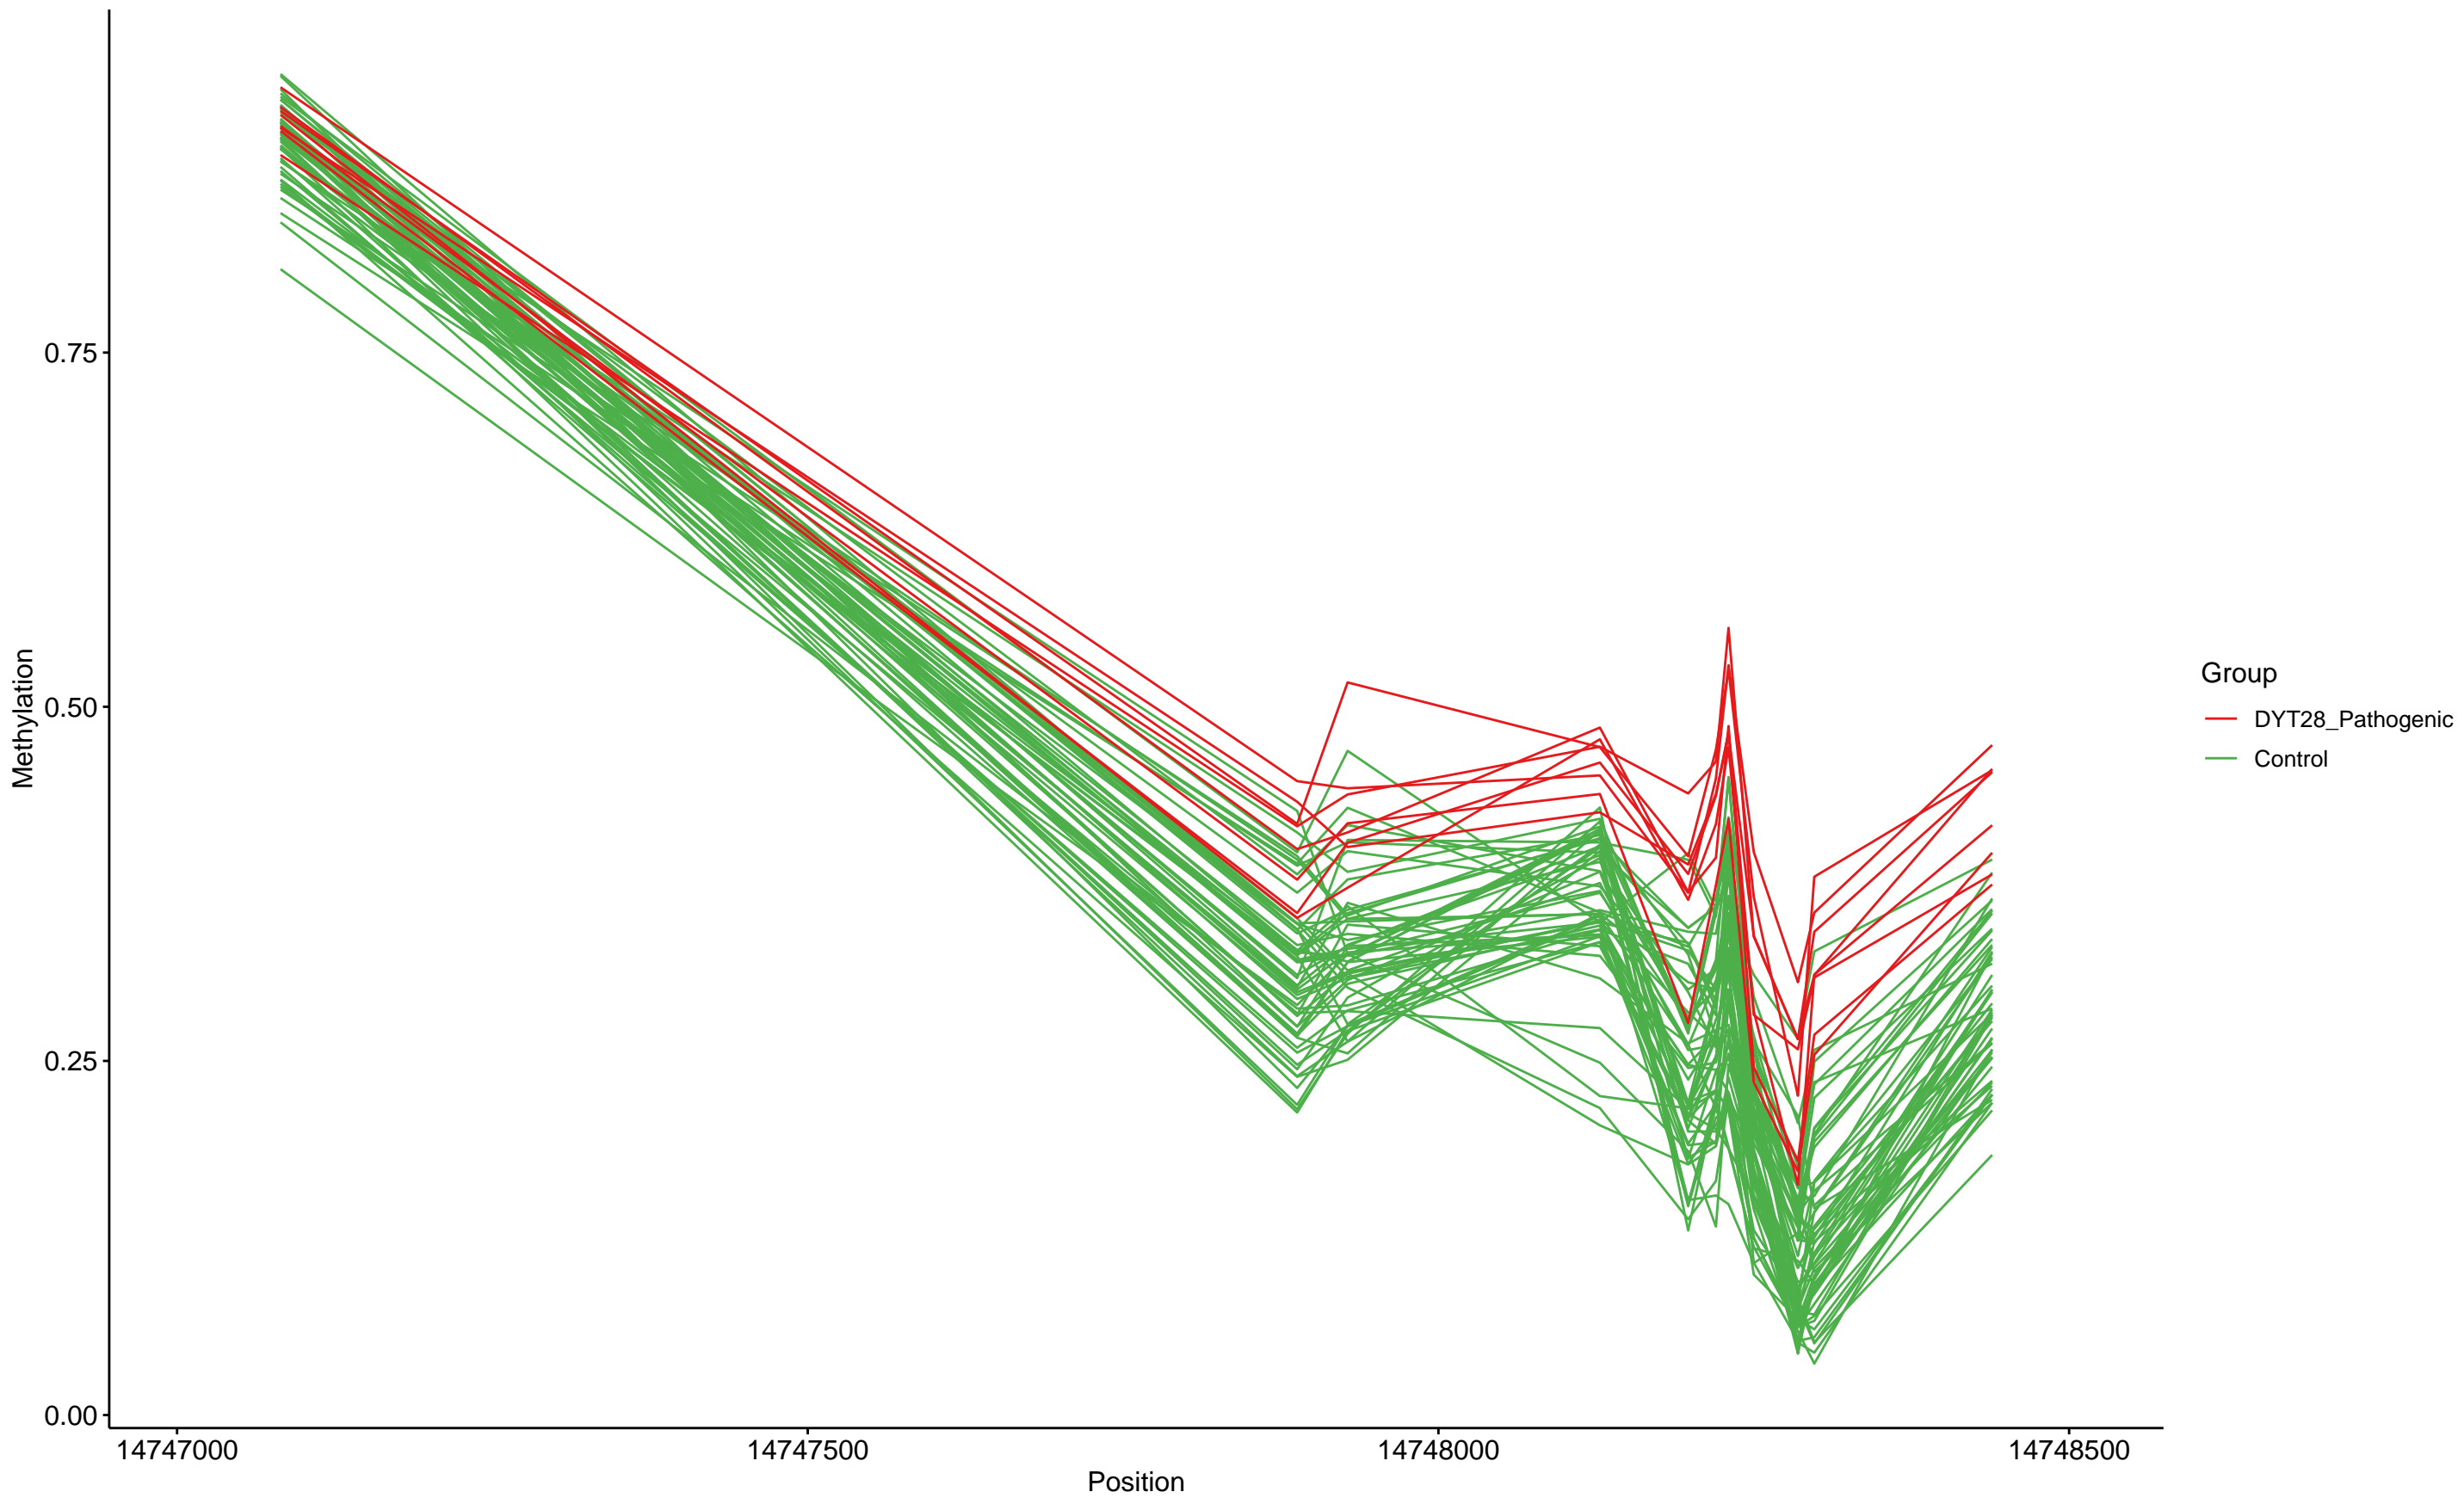

Region 67: chr12:39538106–39539558

Fisher: 1.76317289469929e-36

Stouffer: 1.34421517958593e-32

Mean difference: 0.125478884907578

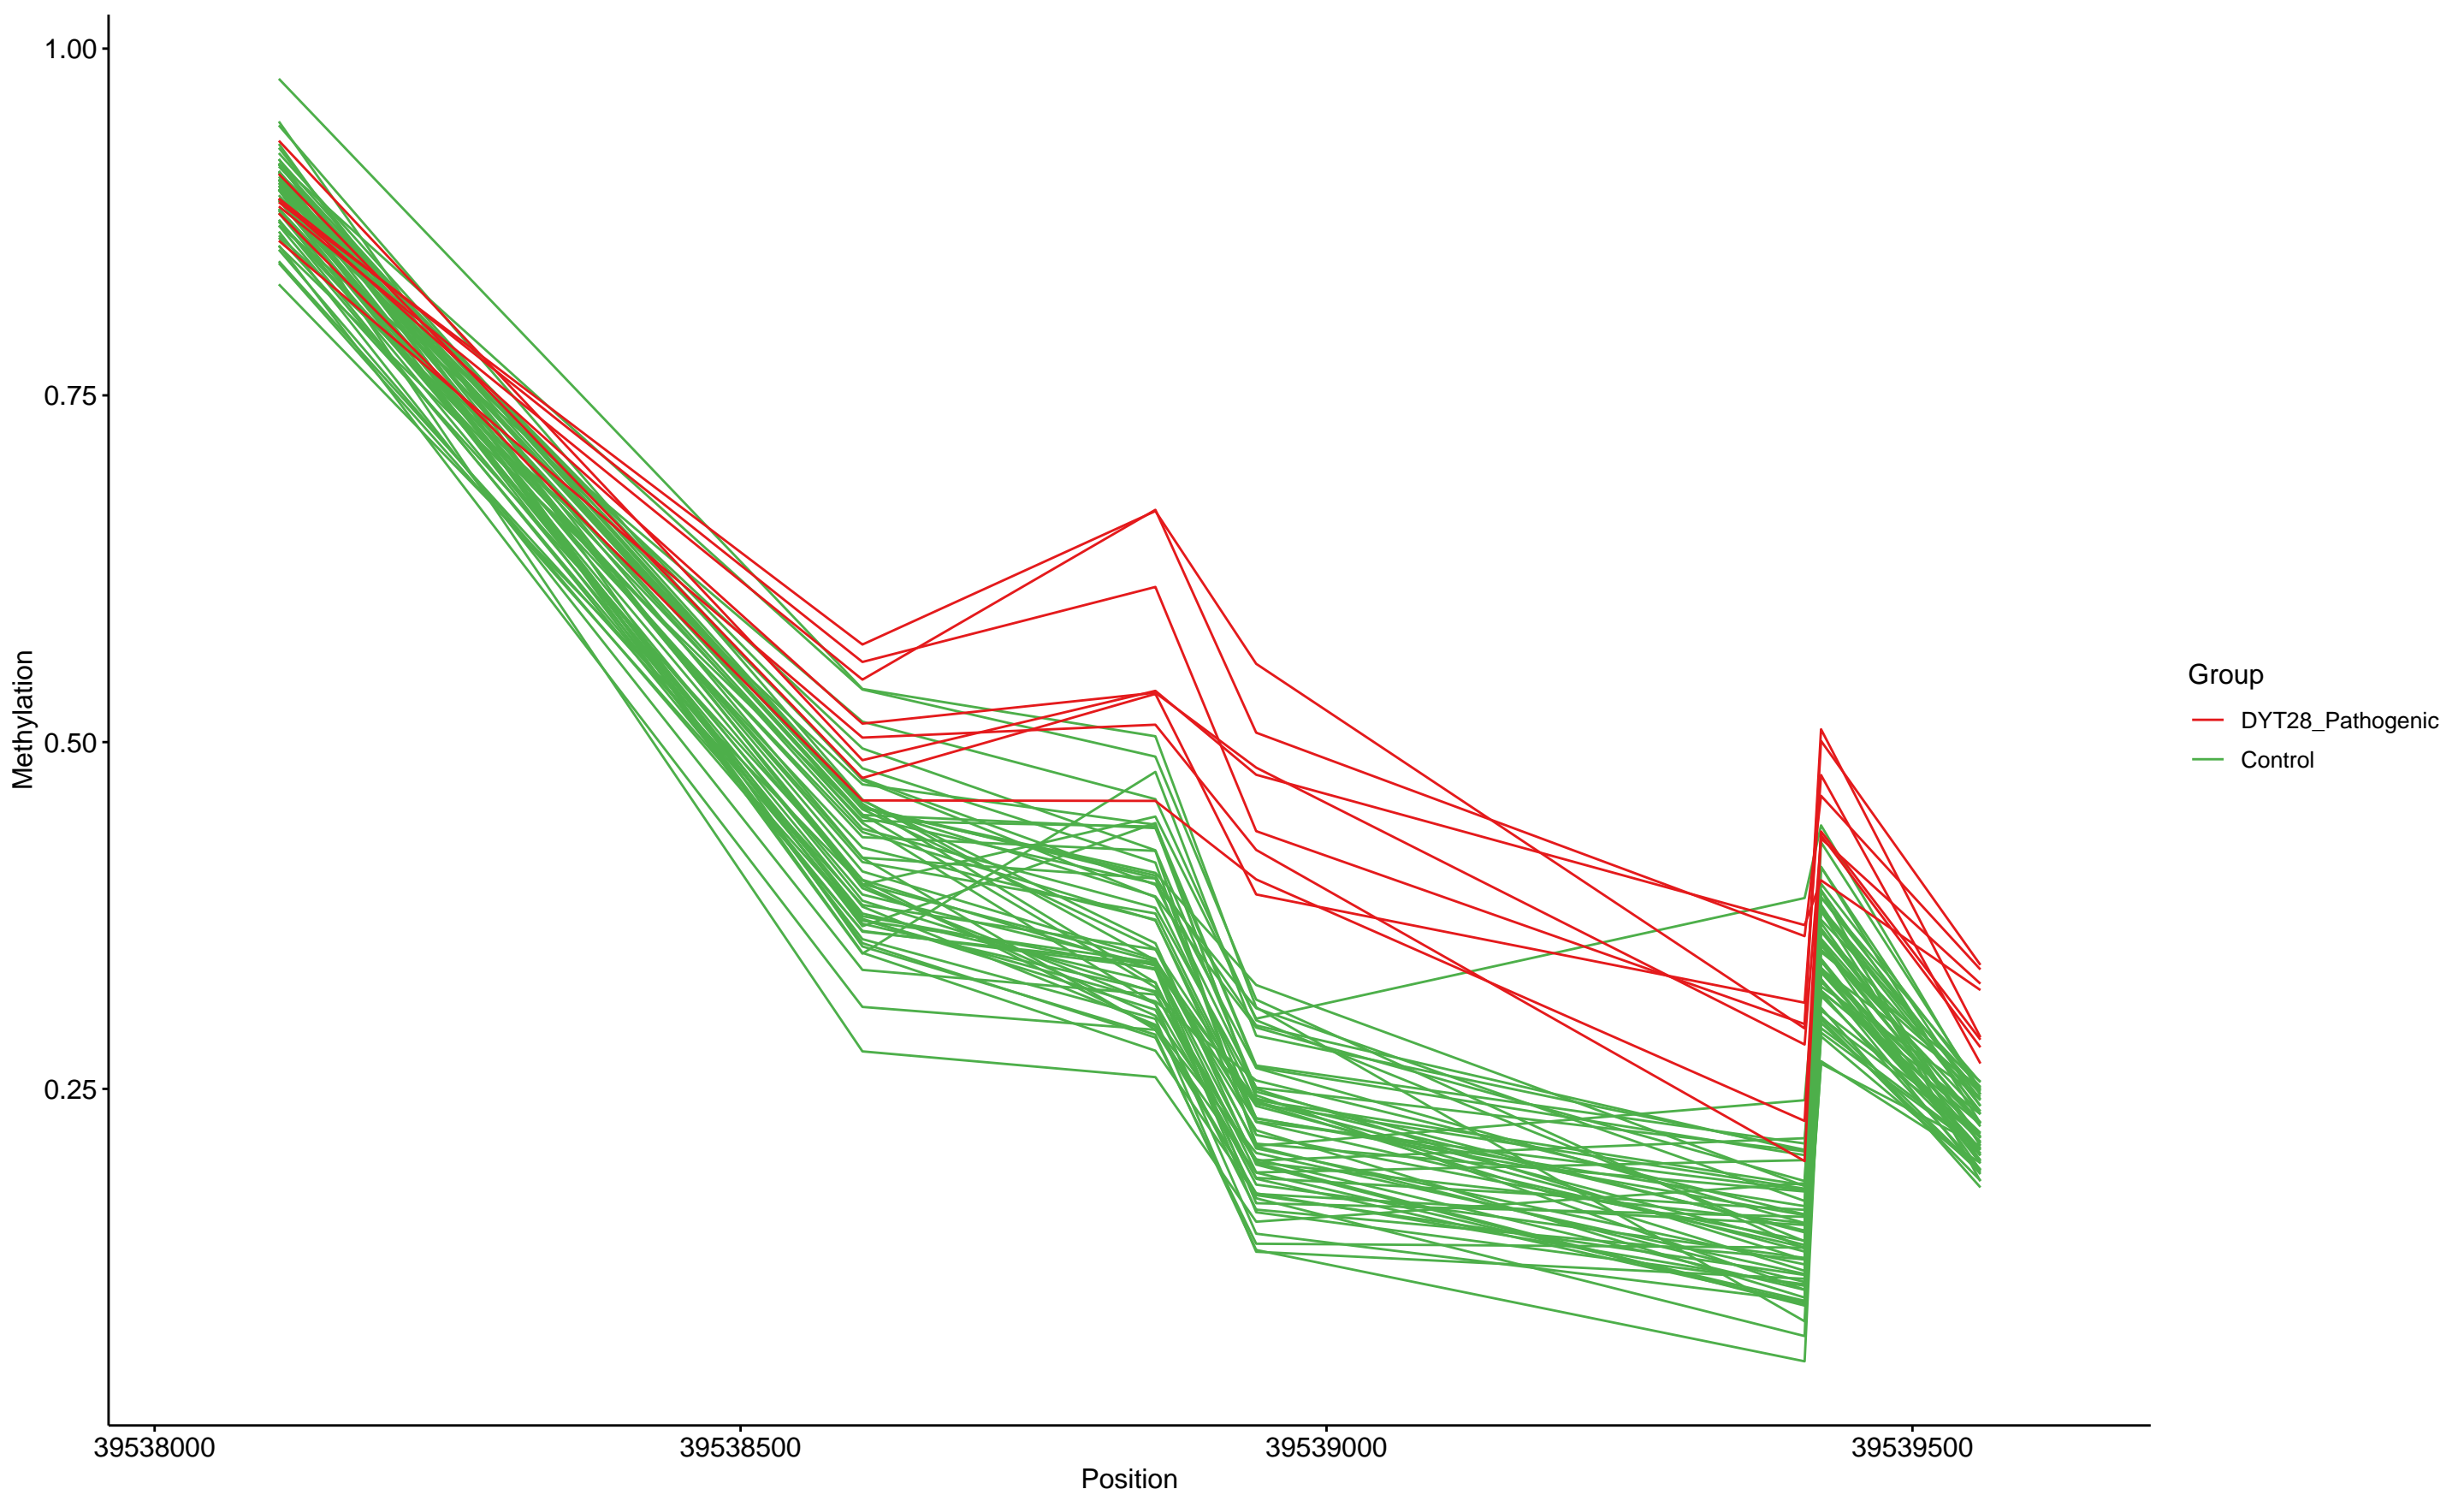

Region 68: chr18:43417389–43419501

Fisher: 3.6768082552276e-36

Stouffer: 5.94201577654531e-33

Mean difference: 0.110313643717701

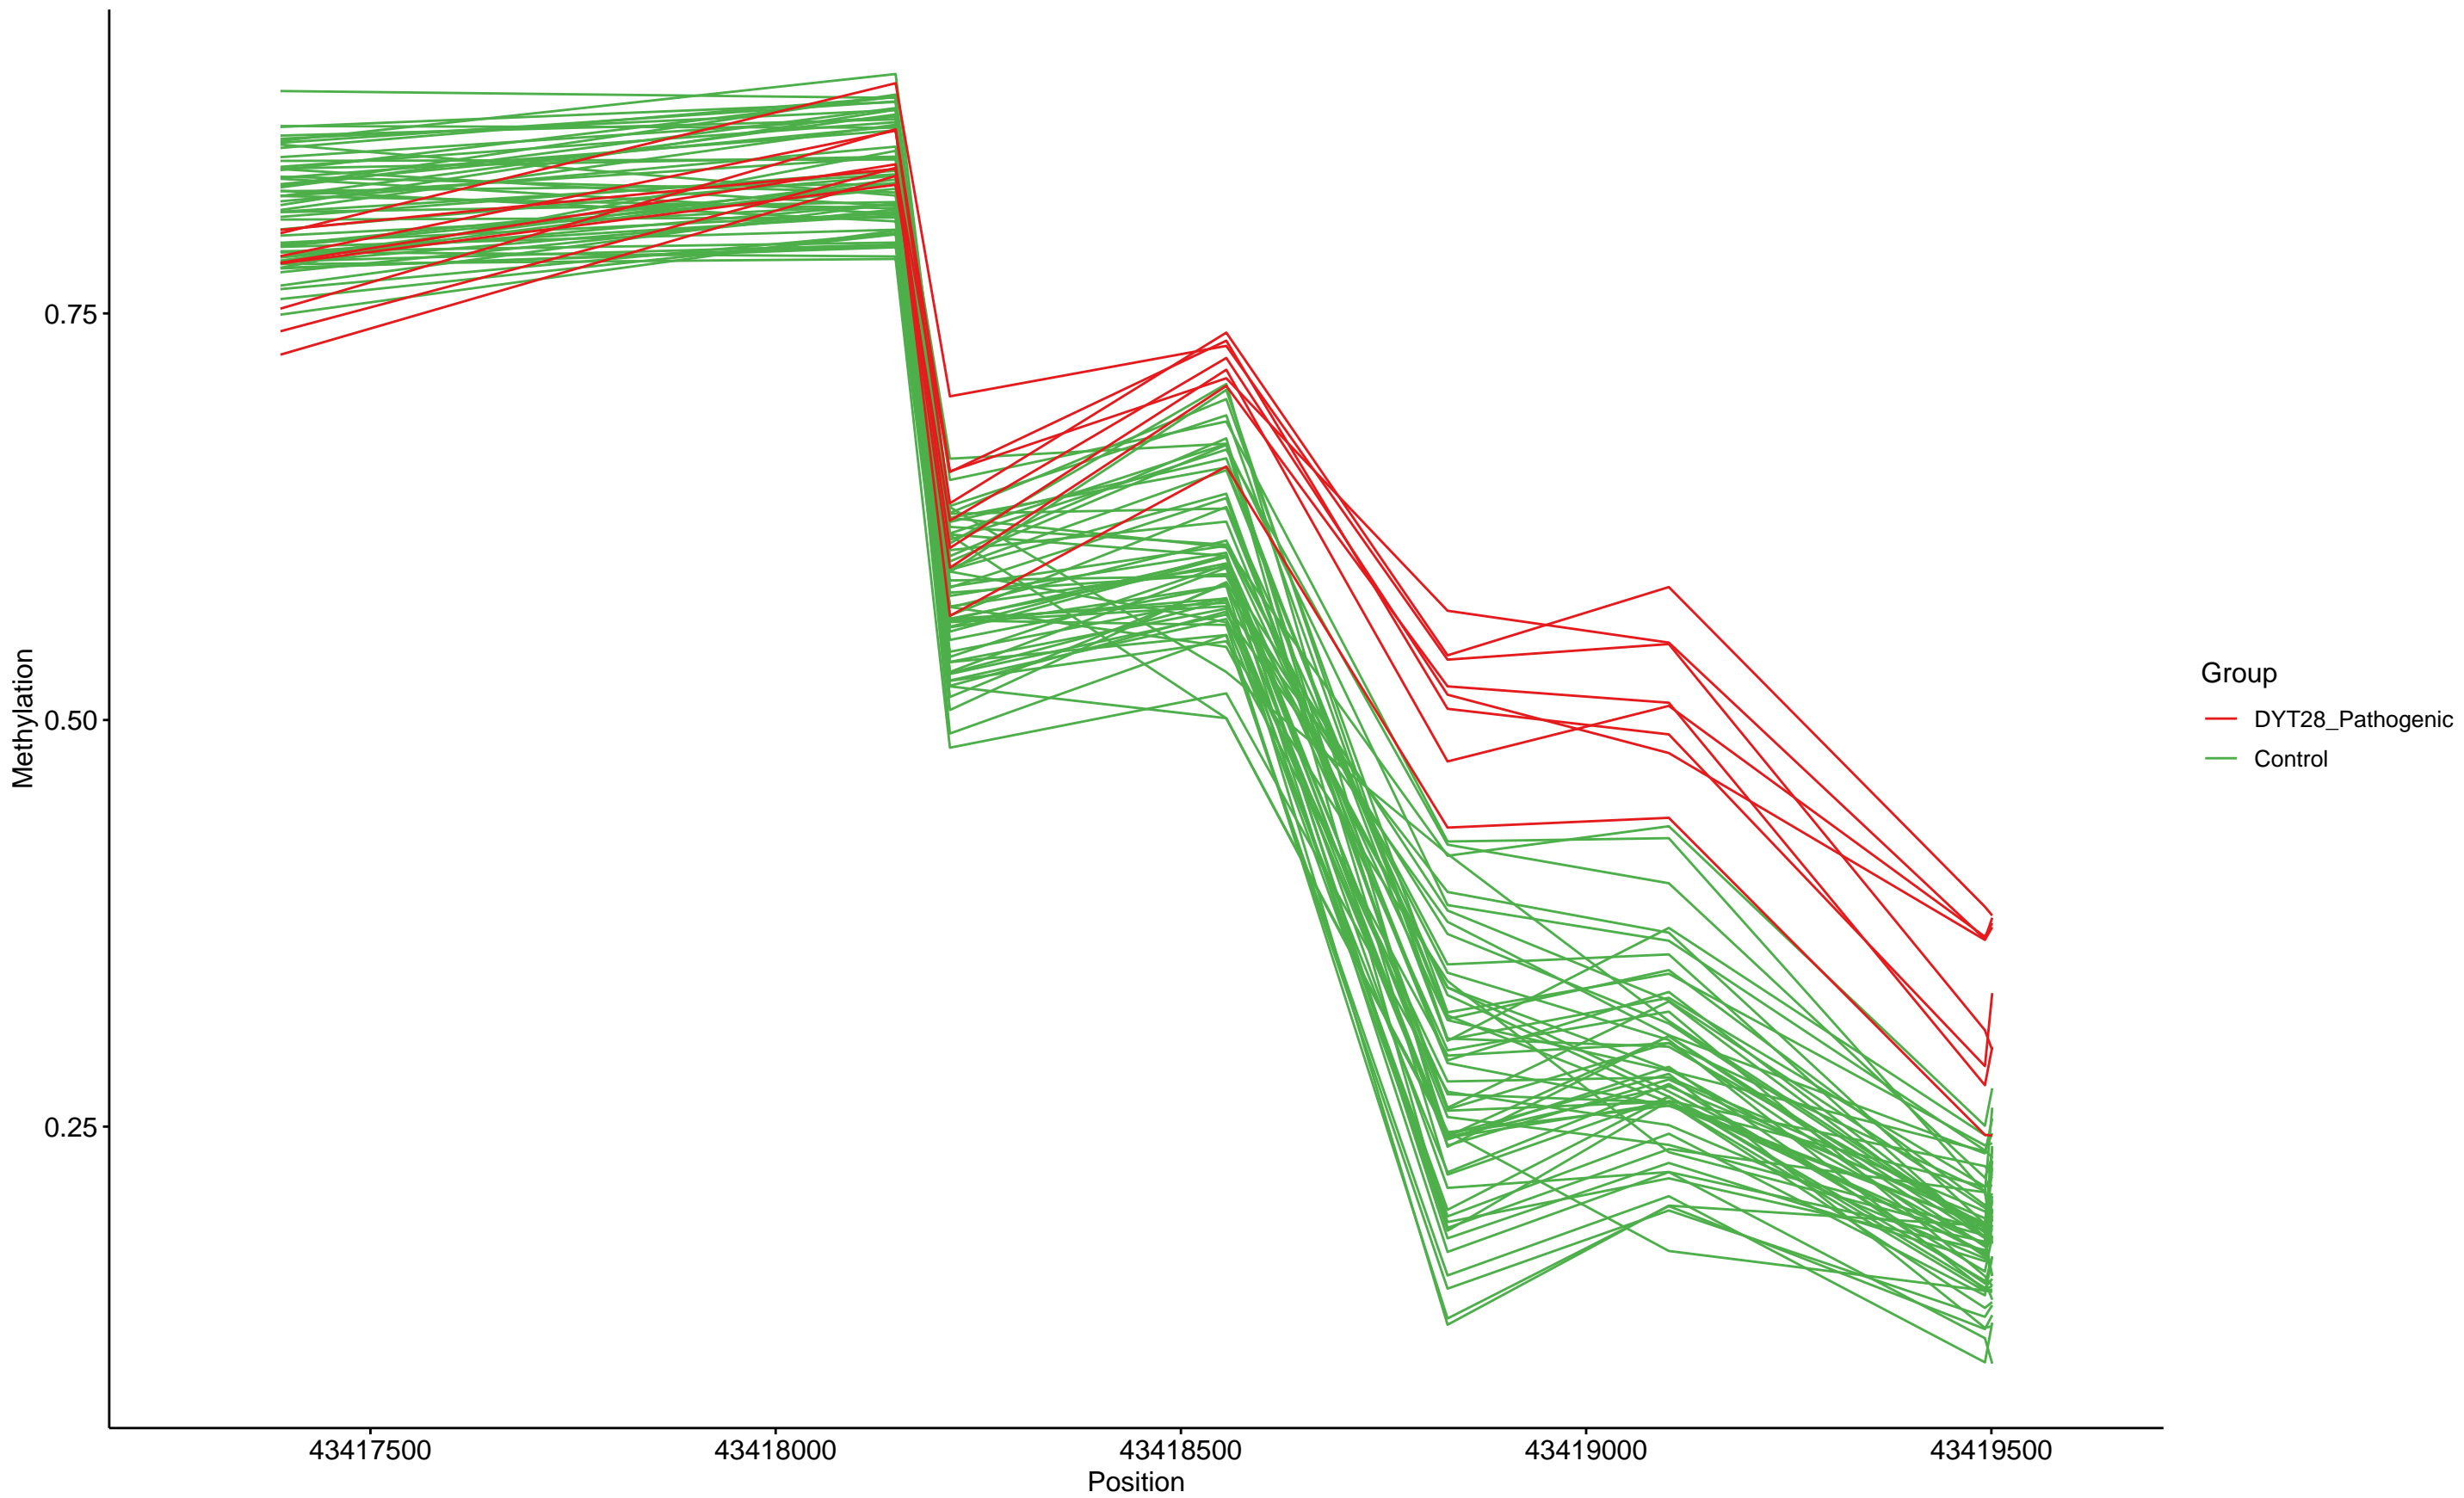



Region 69: chr11:34460107-34461028

Fisher: 5.67050432083815e-36

Stouffer: 7.99279469217054e-40

Mean difference: 0.137482600512964

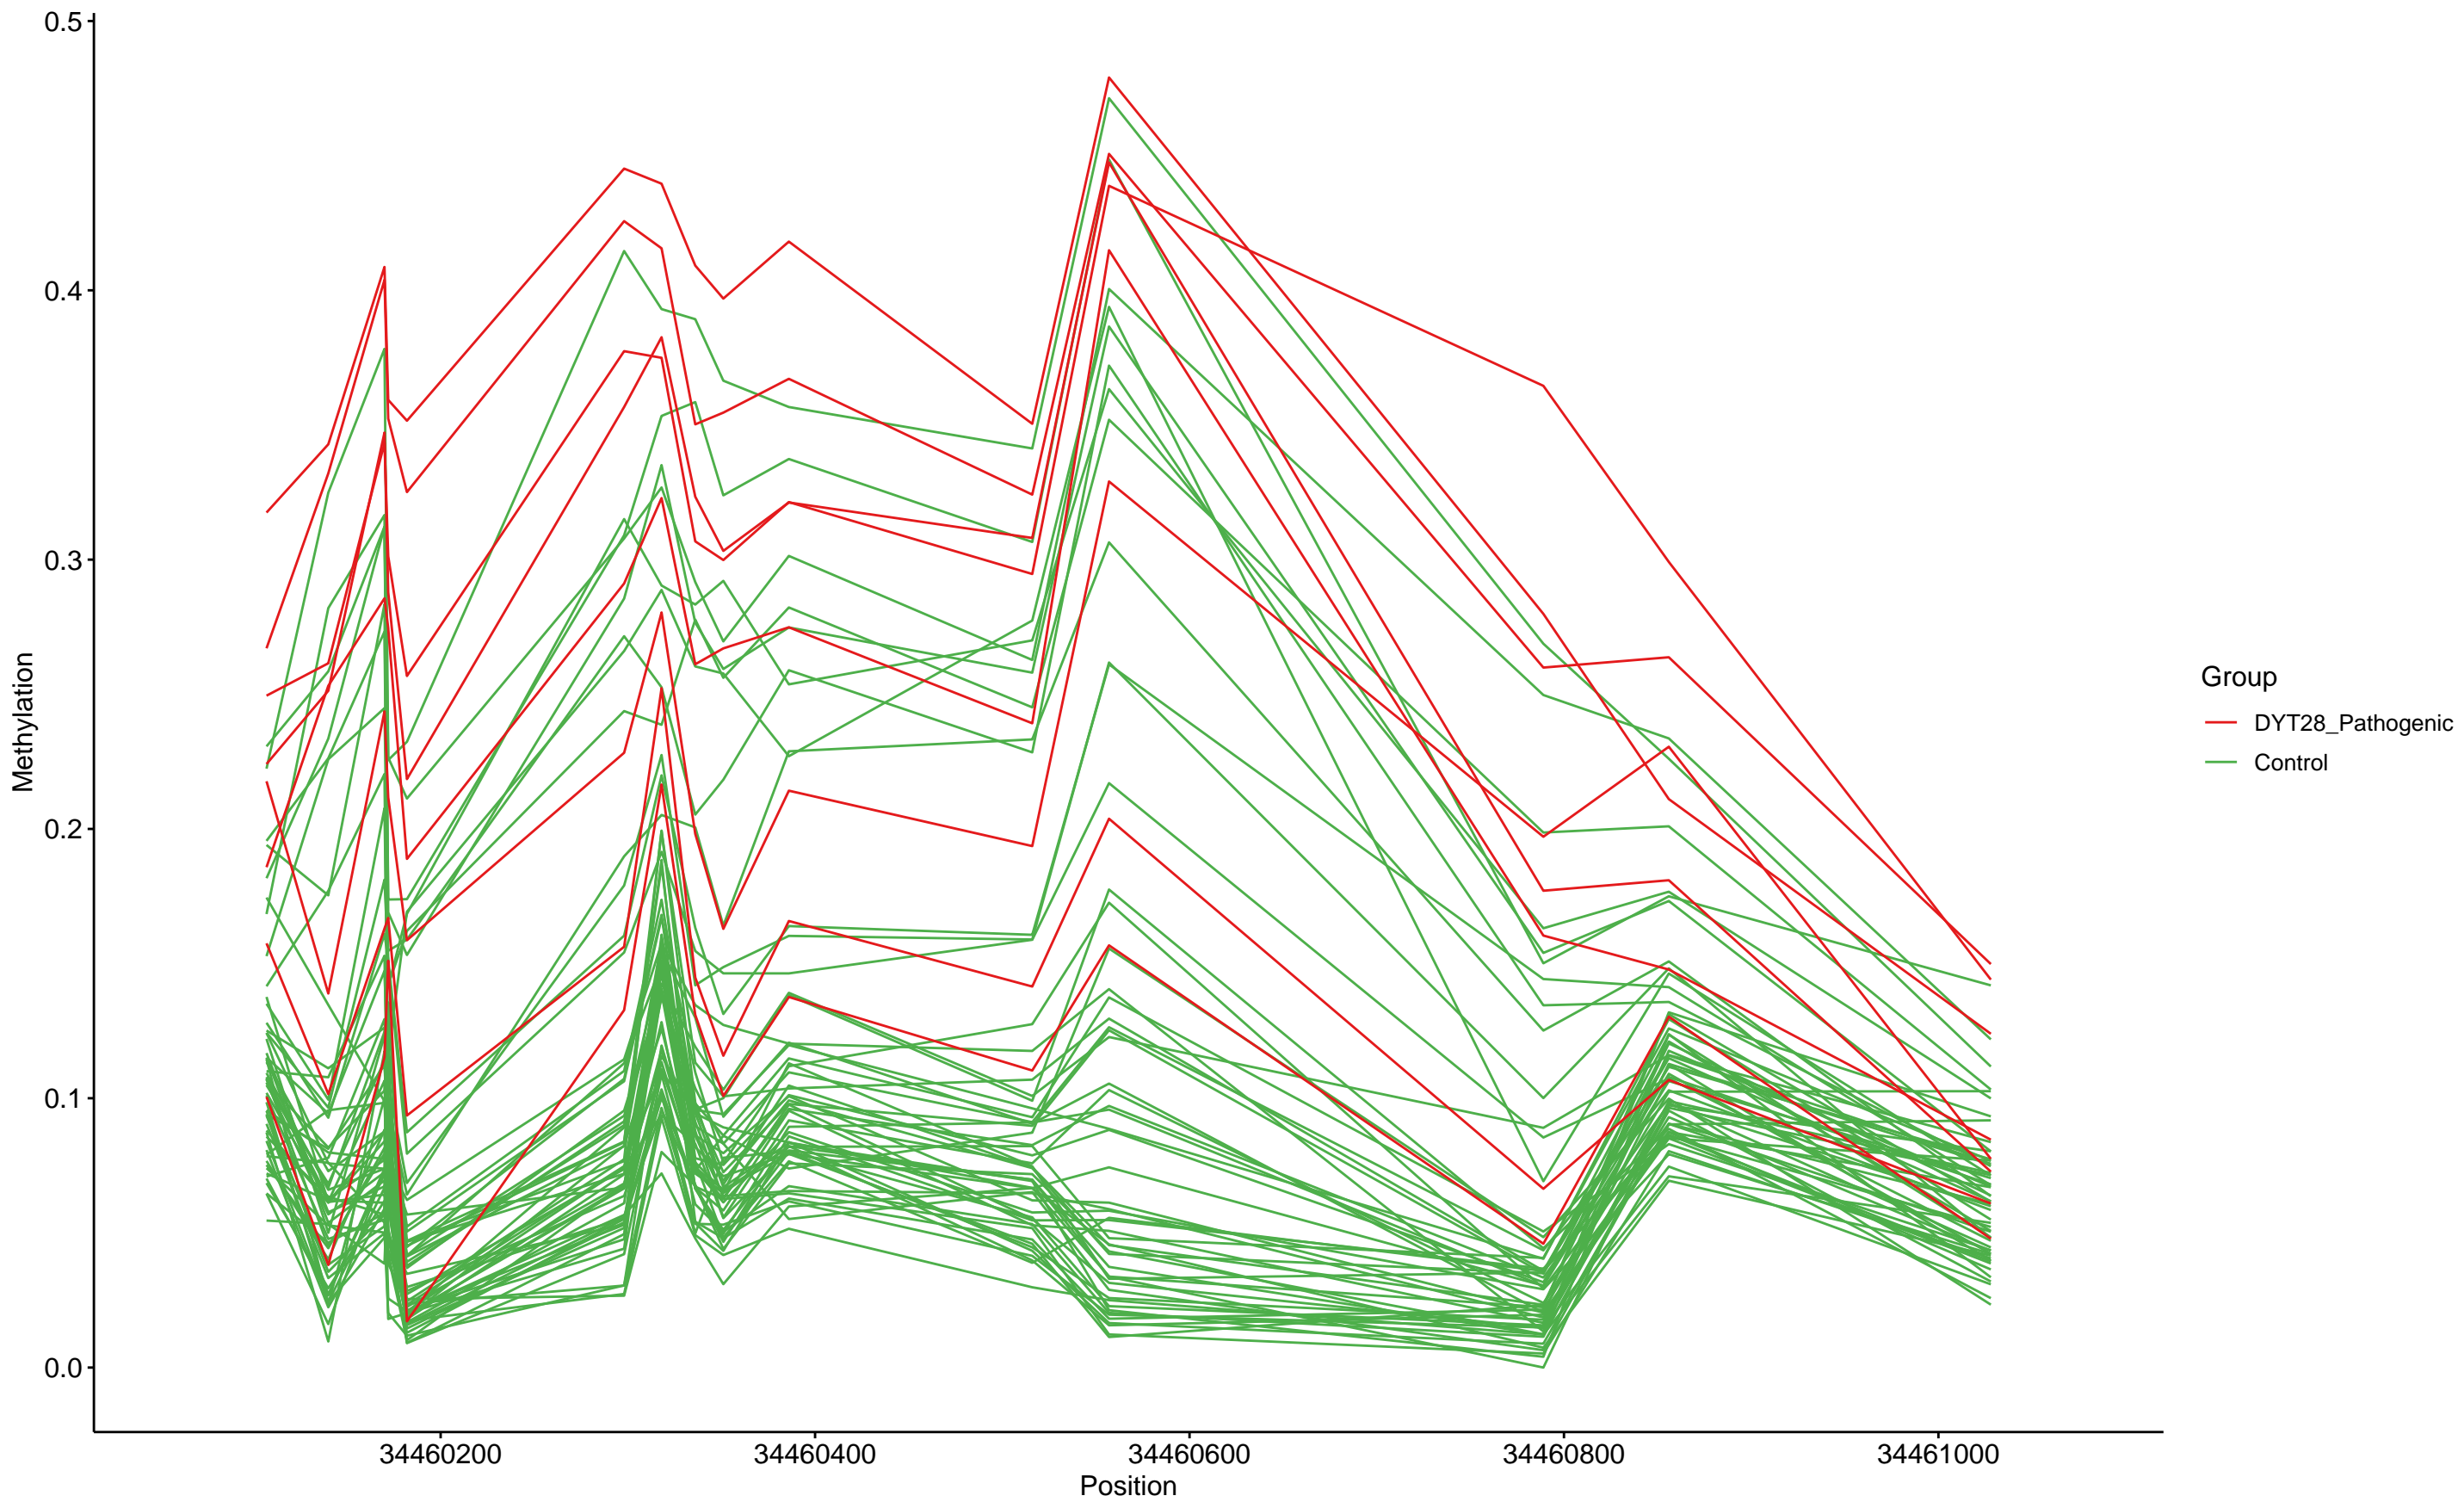

Region 70: chr3:146187126–146187962

Fisher:  $9.68285360738069e-36$

Stouffer:  $5.50053180272939e-35$

Mean difference: 0.215304306435394

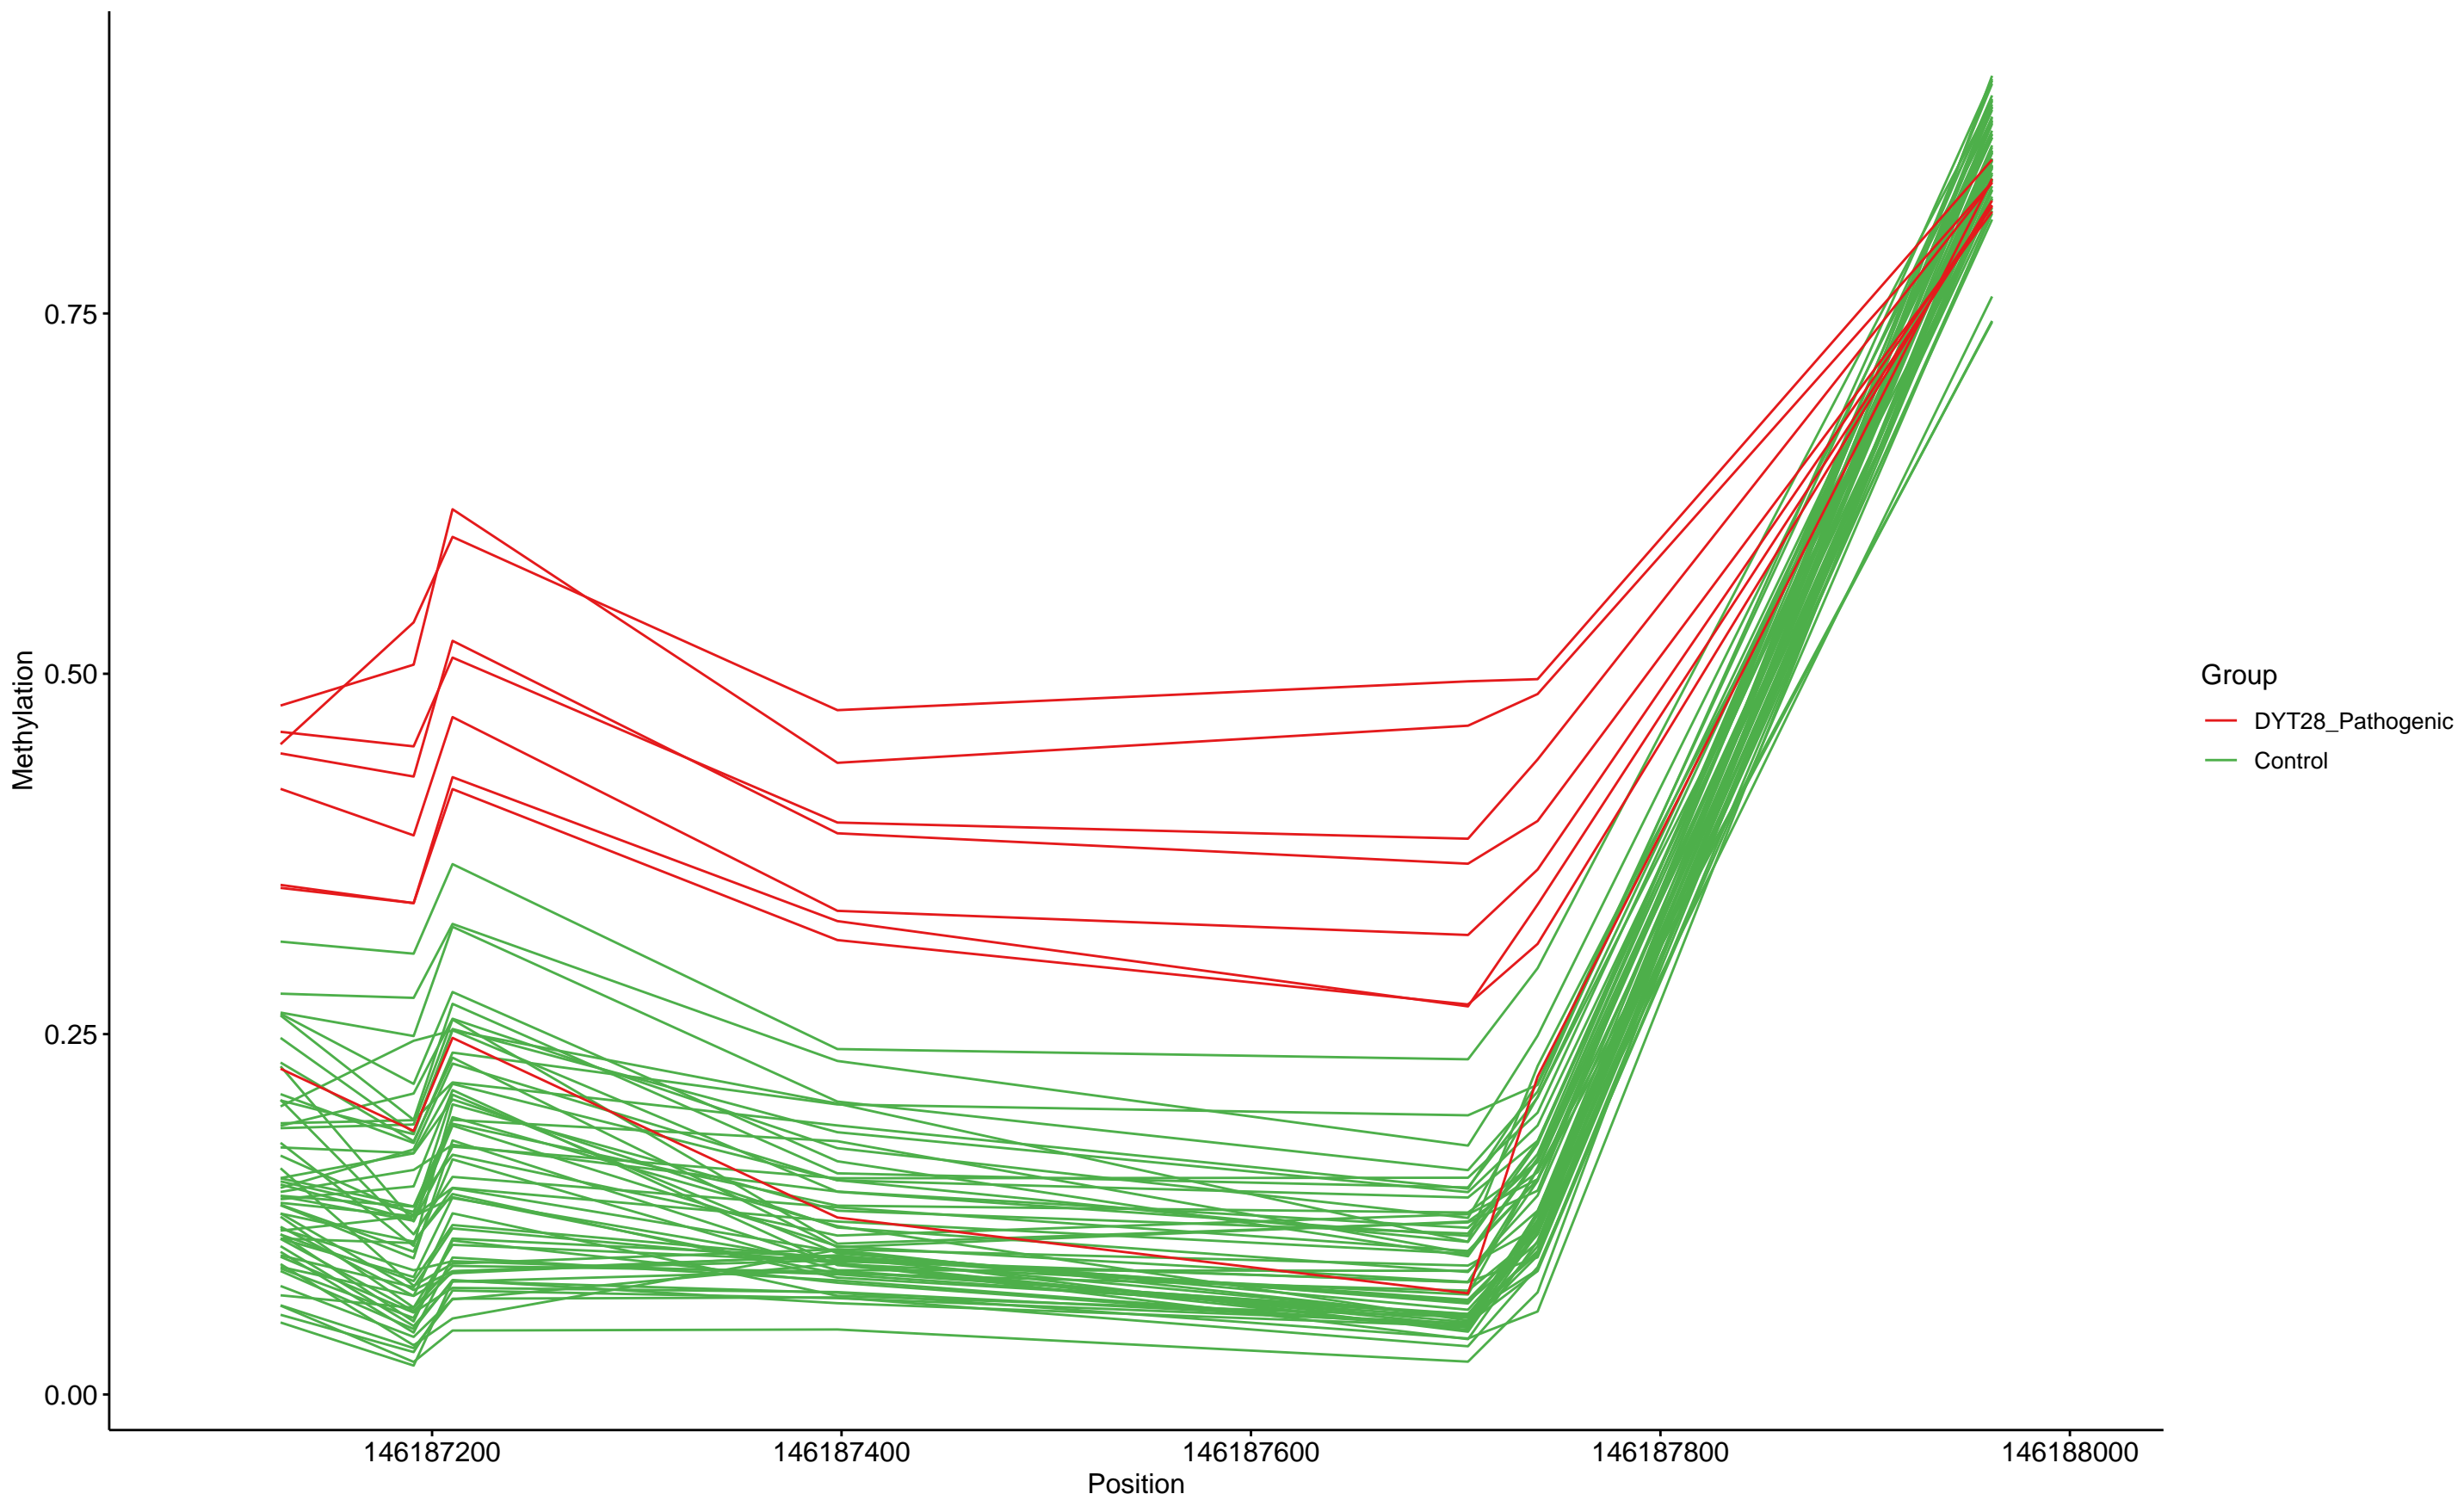

Region 71: chr1:167090618–167091161

Fisher: 1.81851469109009e-35

Stouffer: 1.19040325616299e-32

Mean difference: 0.132745337280127

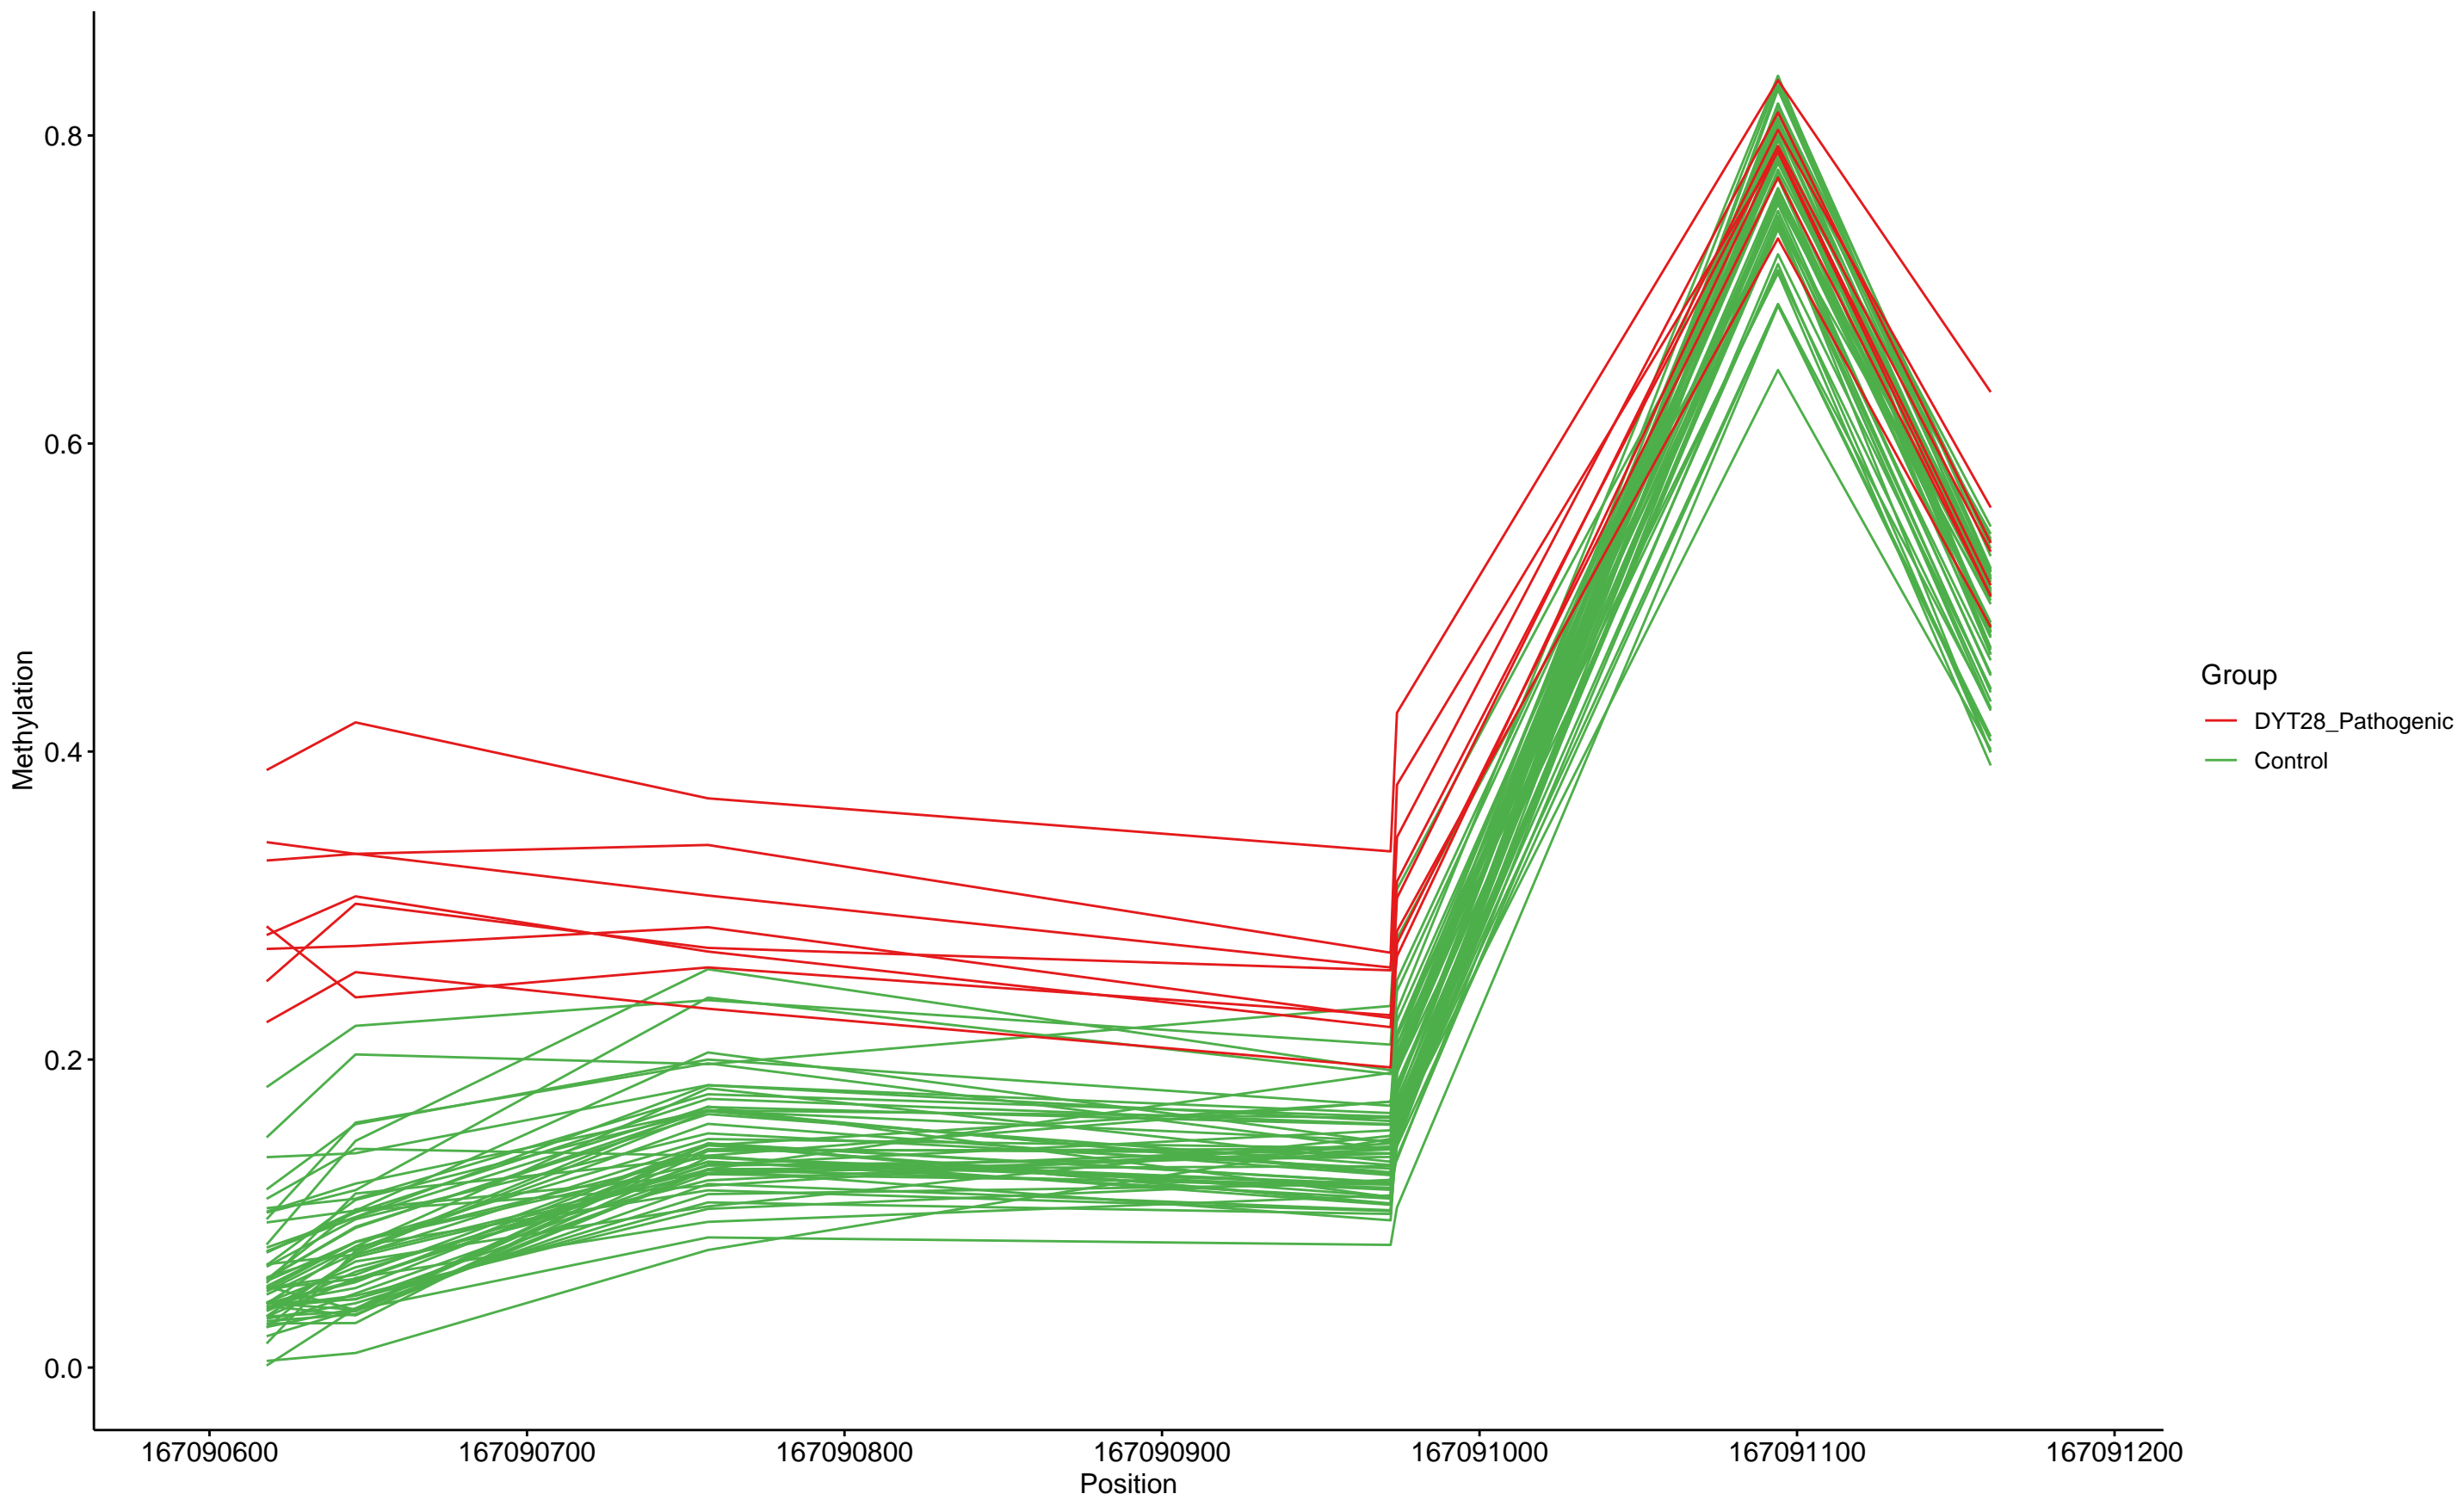

Region 72: chr5:68628240–68629755

Fisher: 3.57231059304986e-35

Stouffer: 9.43491293575303e-38

Mean difference: 0.10668254083343

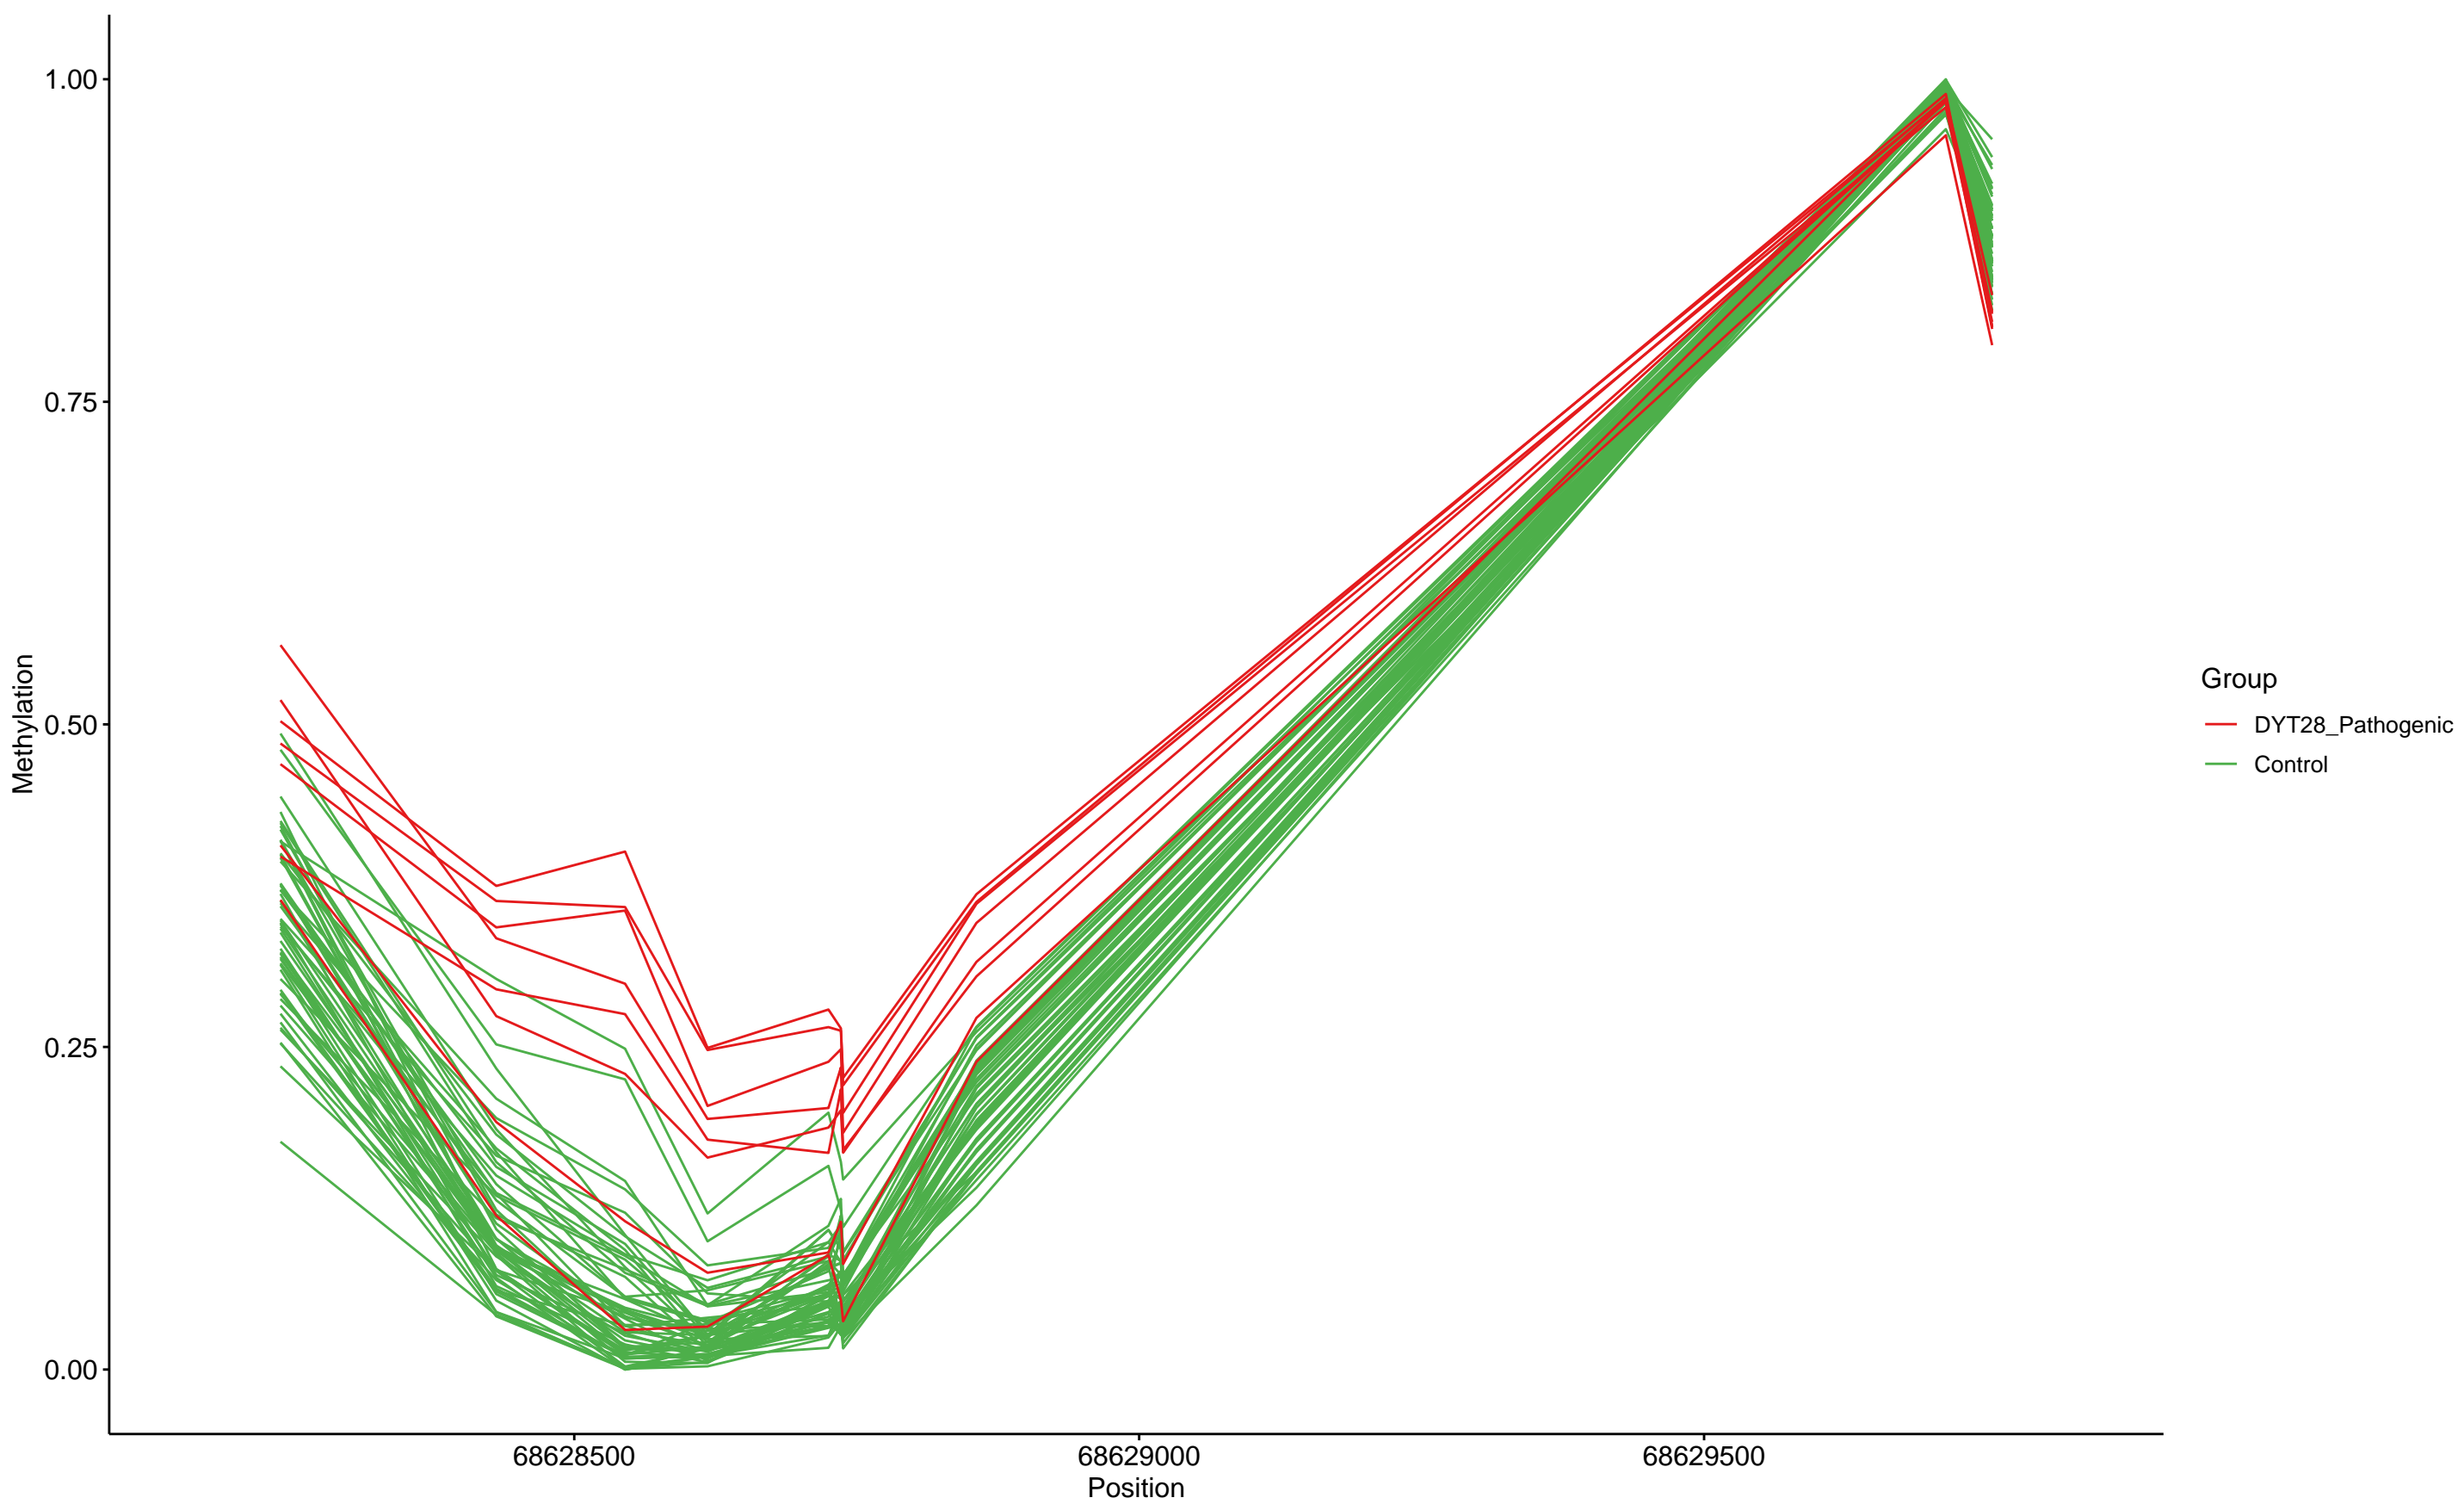



Region 73: chr6:27205383–27206664

Fisher: 4.83725964558324e-35

Stouffer: 2.3850307629284e-34

Mean difference: 0.12154083030053

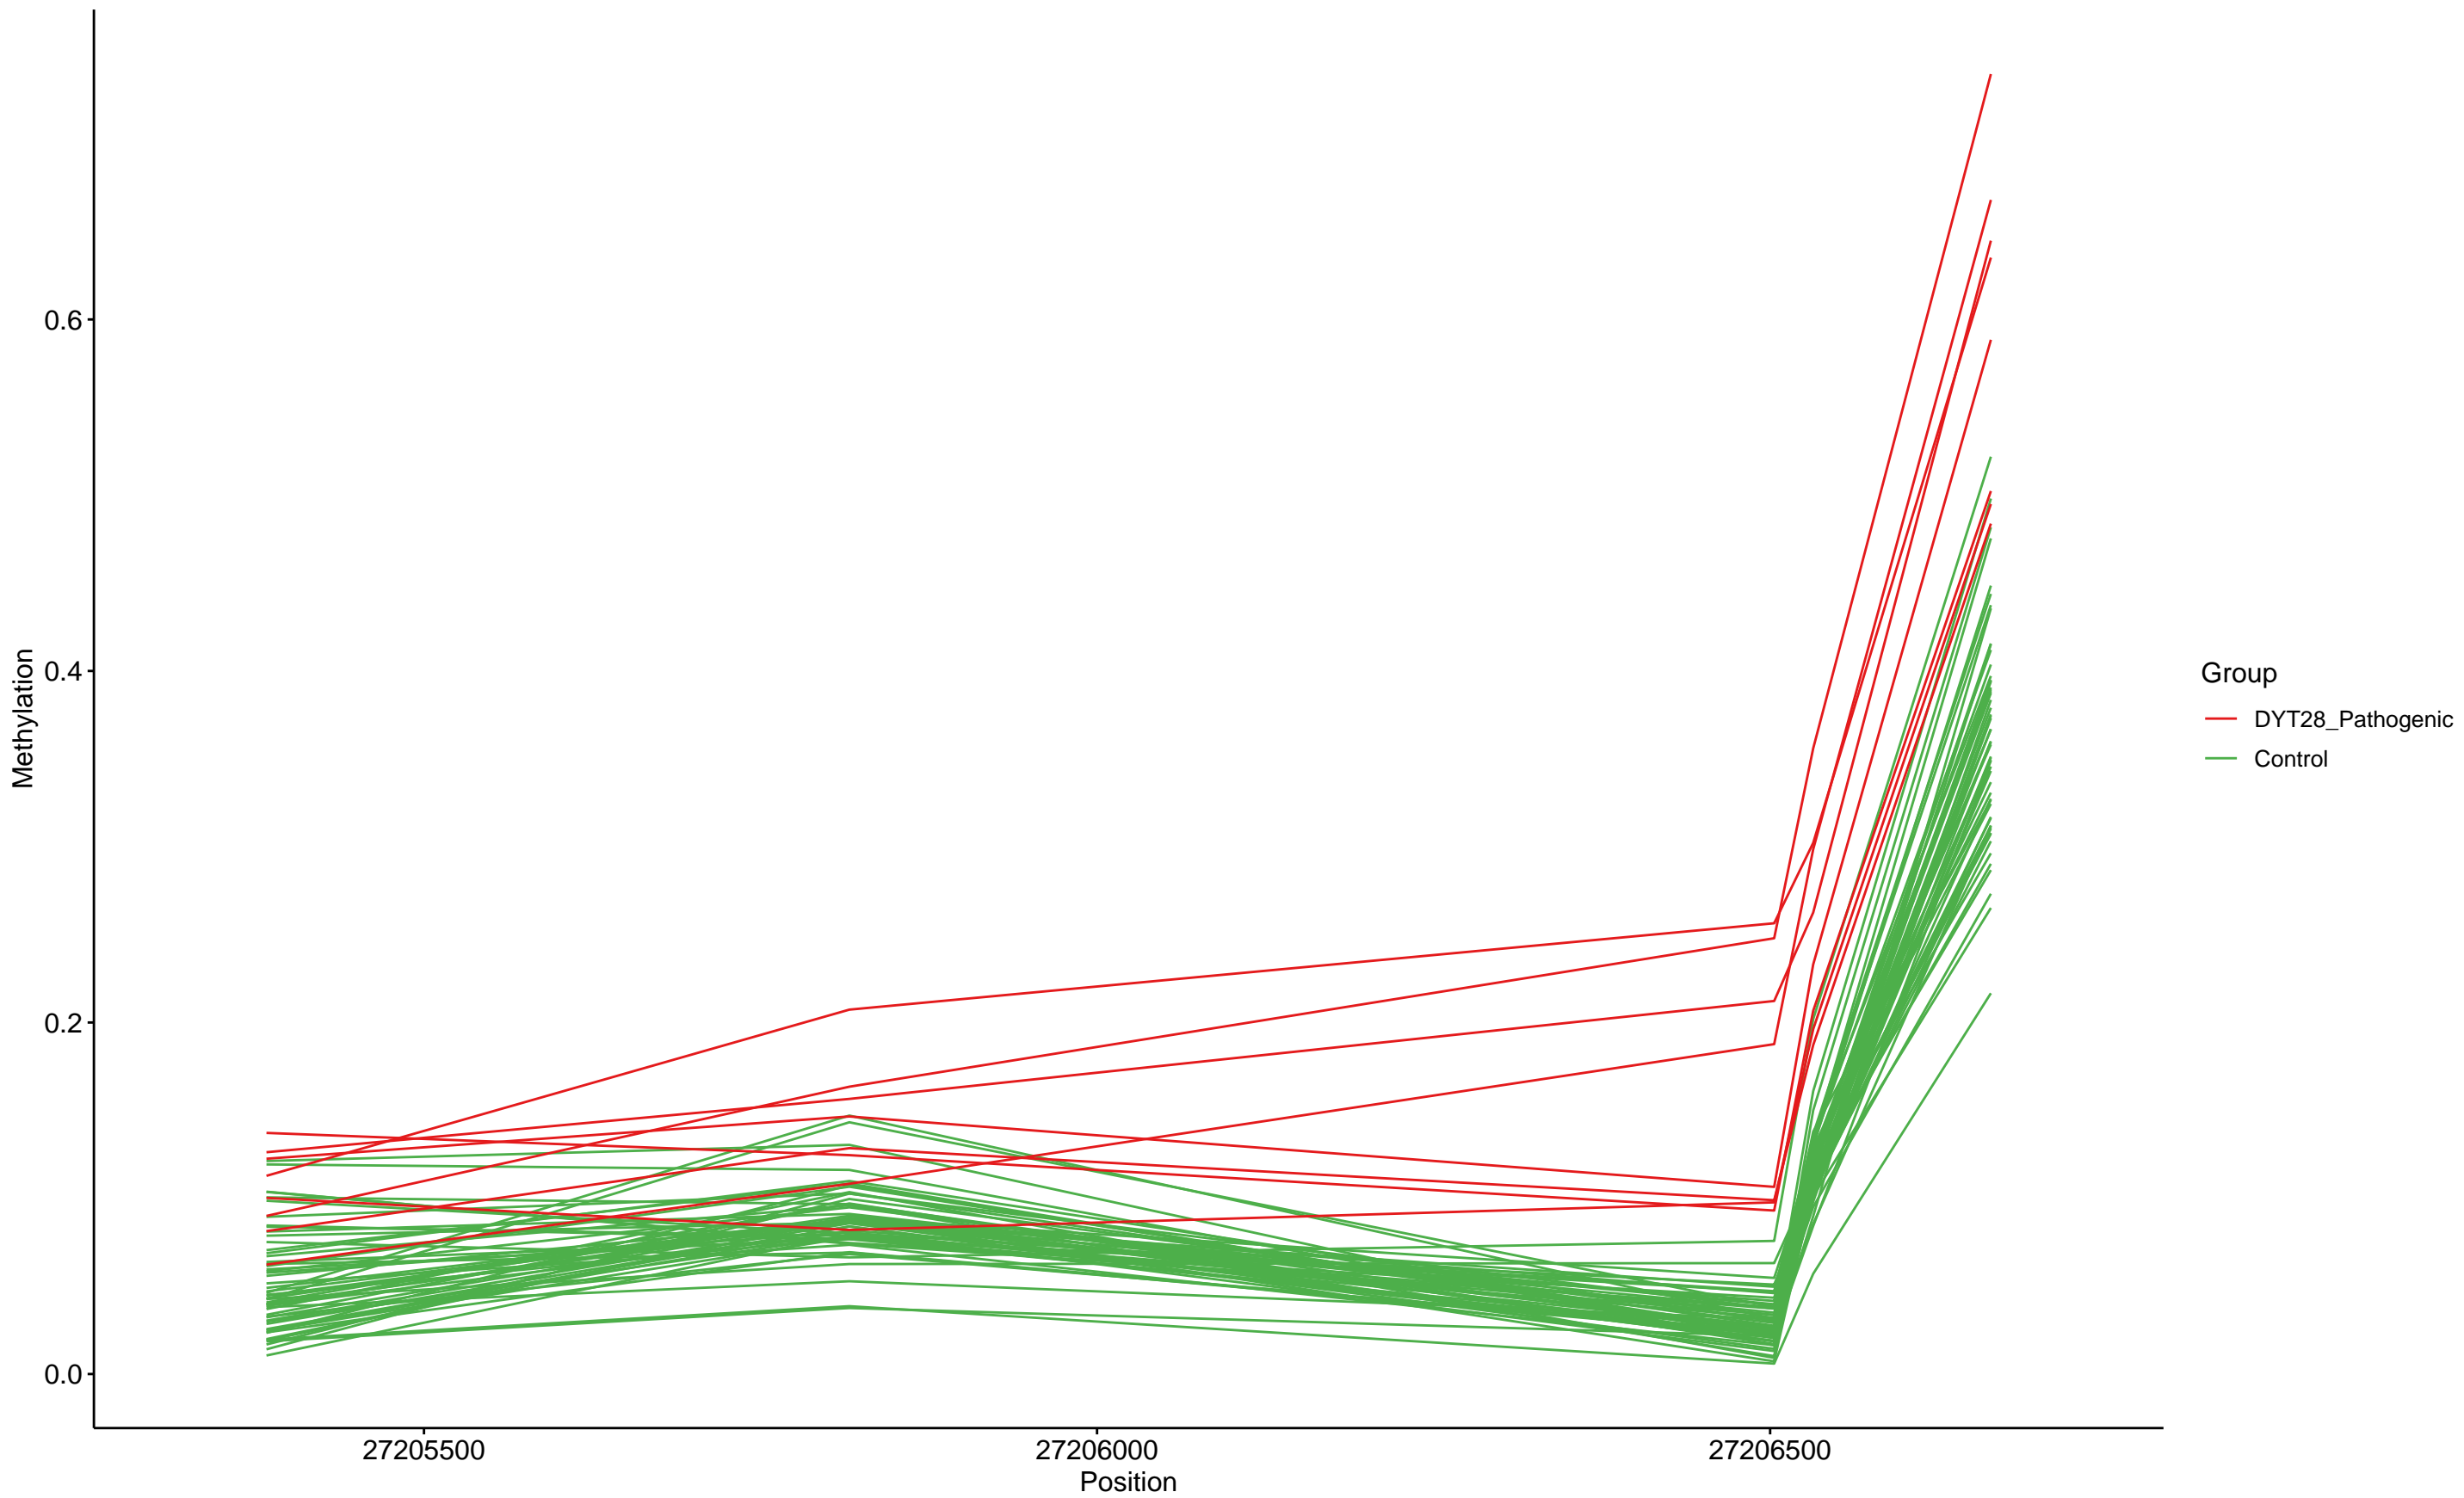

Region 74: chr8:102235334-102237217

Fisher: 2.41623232449383e-34

Stouffer: 6.37061054439019e-33

Mean difference: 0.120552293480567

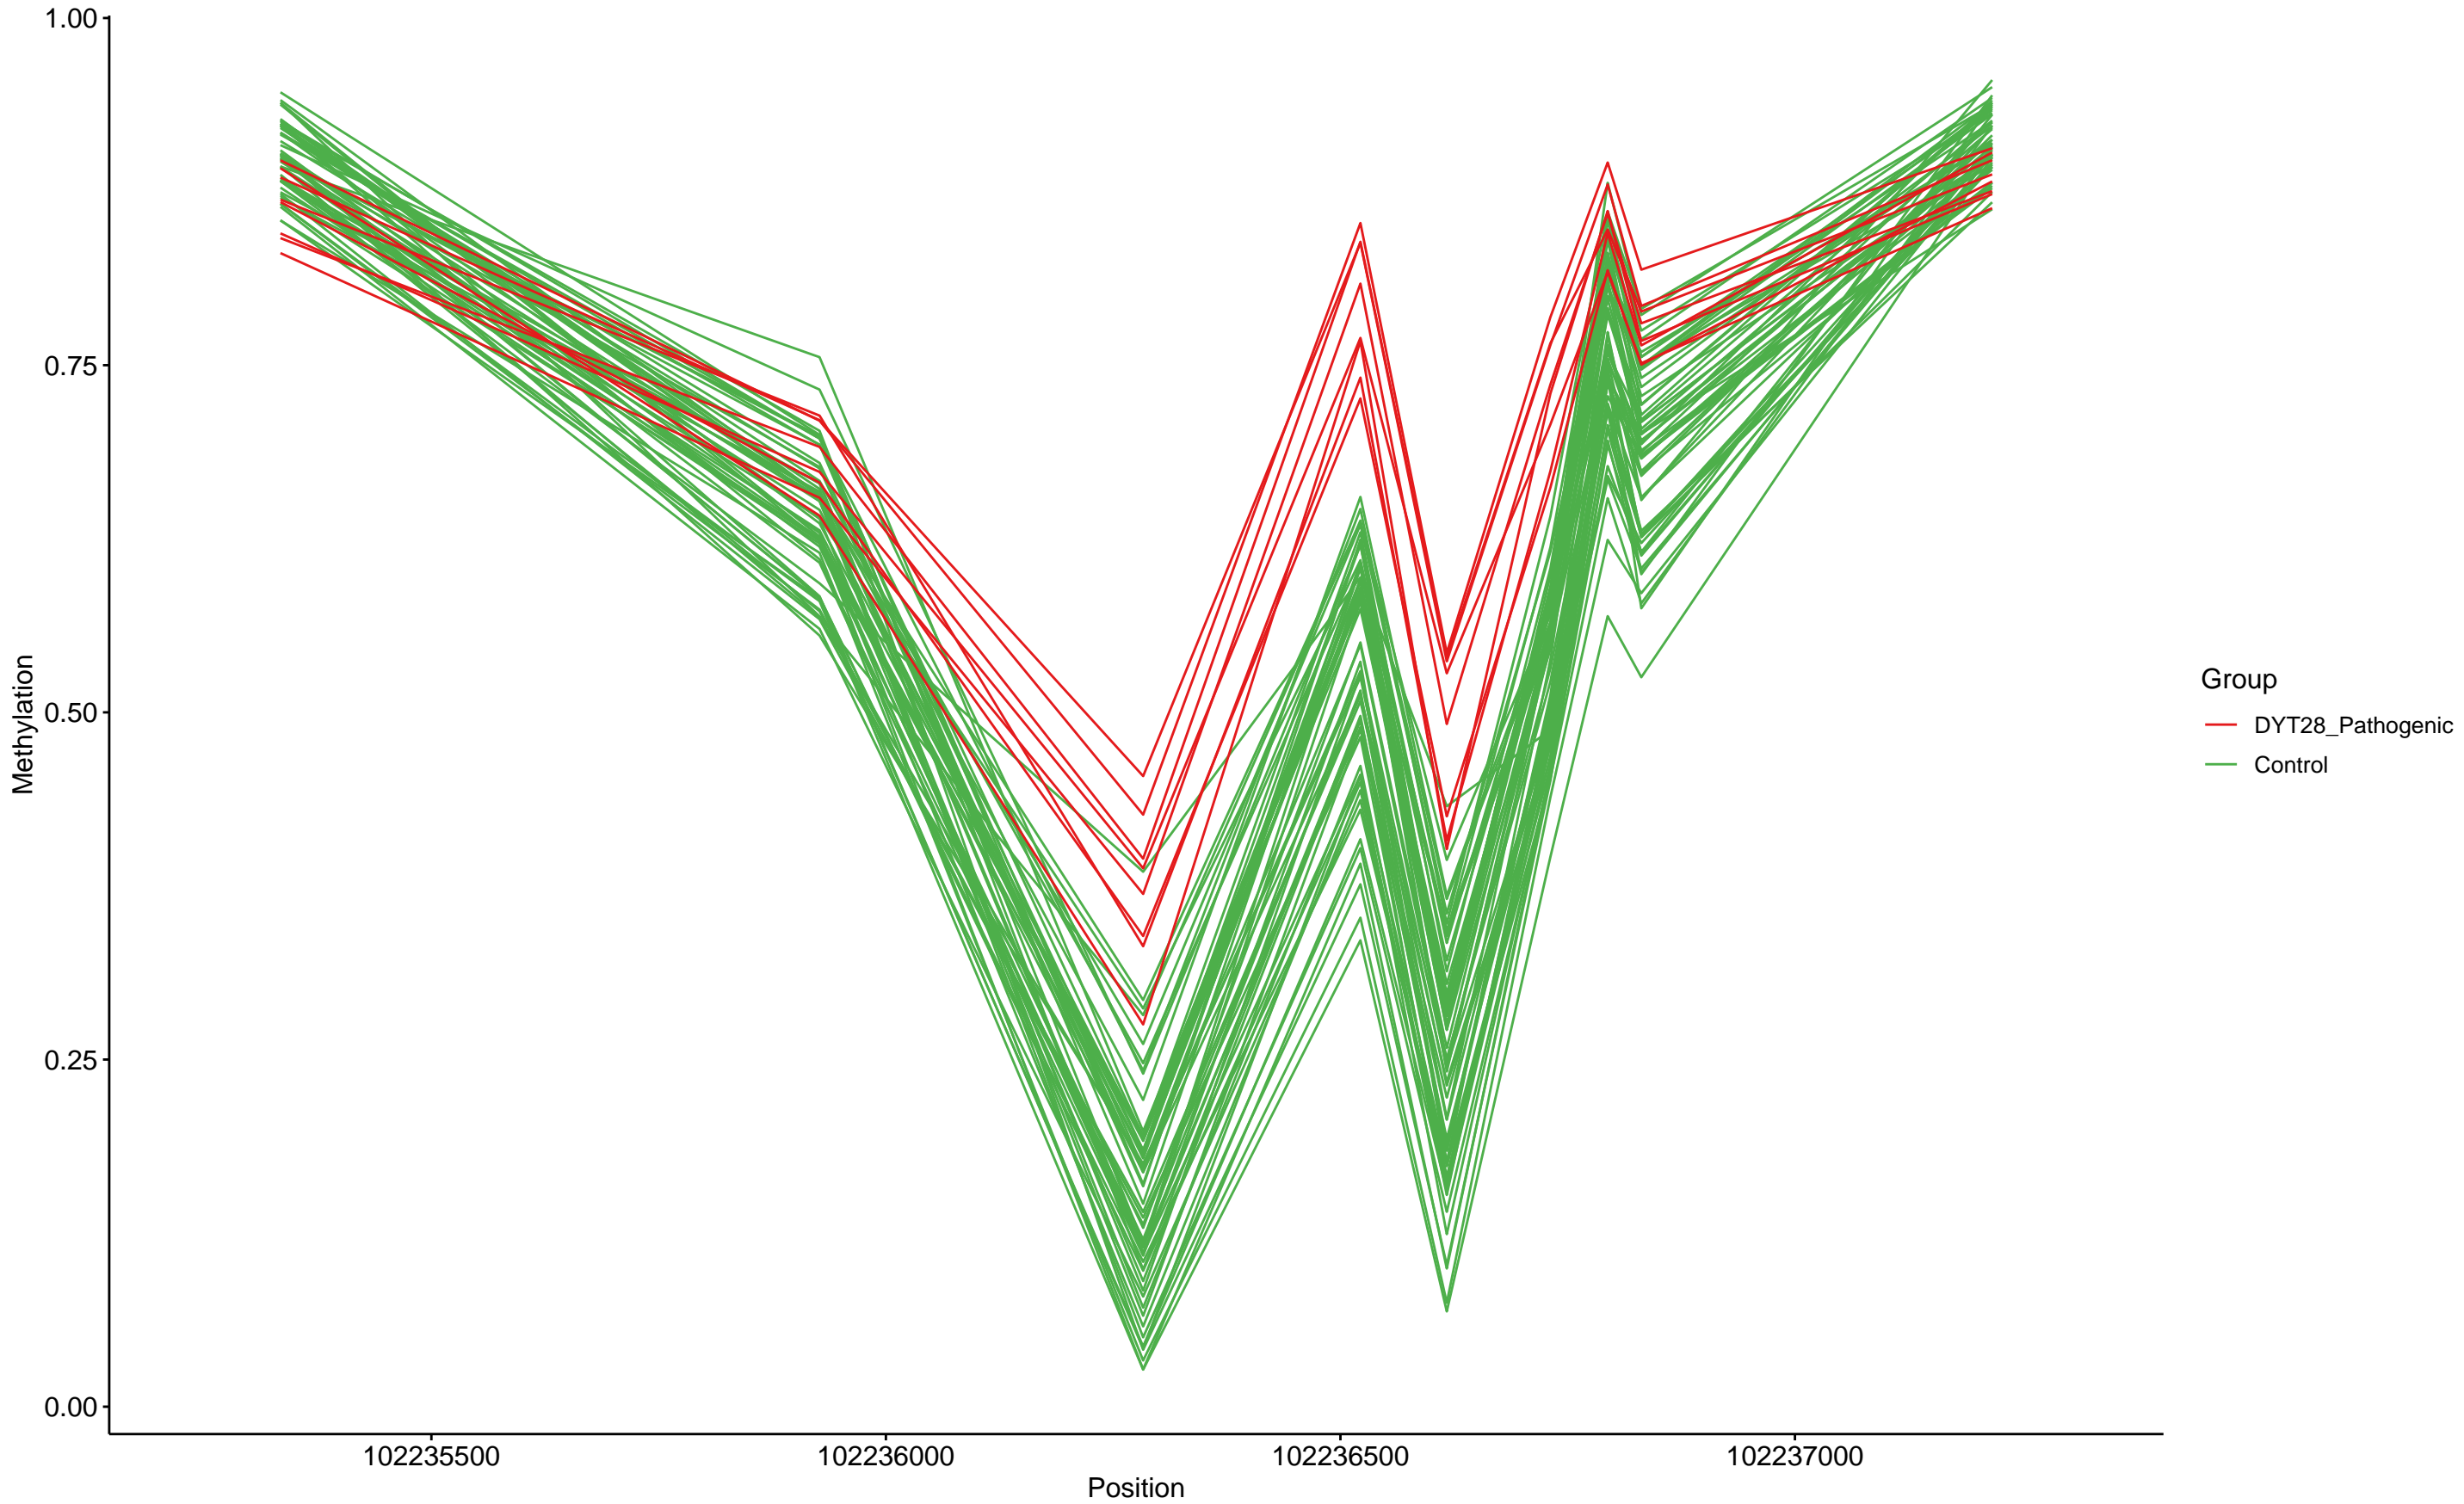

Region 75: chr13:52769289–52770931

Fisher: 2.75056572585582e-34

Stouffer: 3.9429238975802e-33

Mean difference: 0.156476090938499

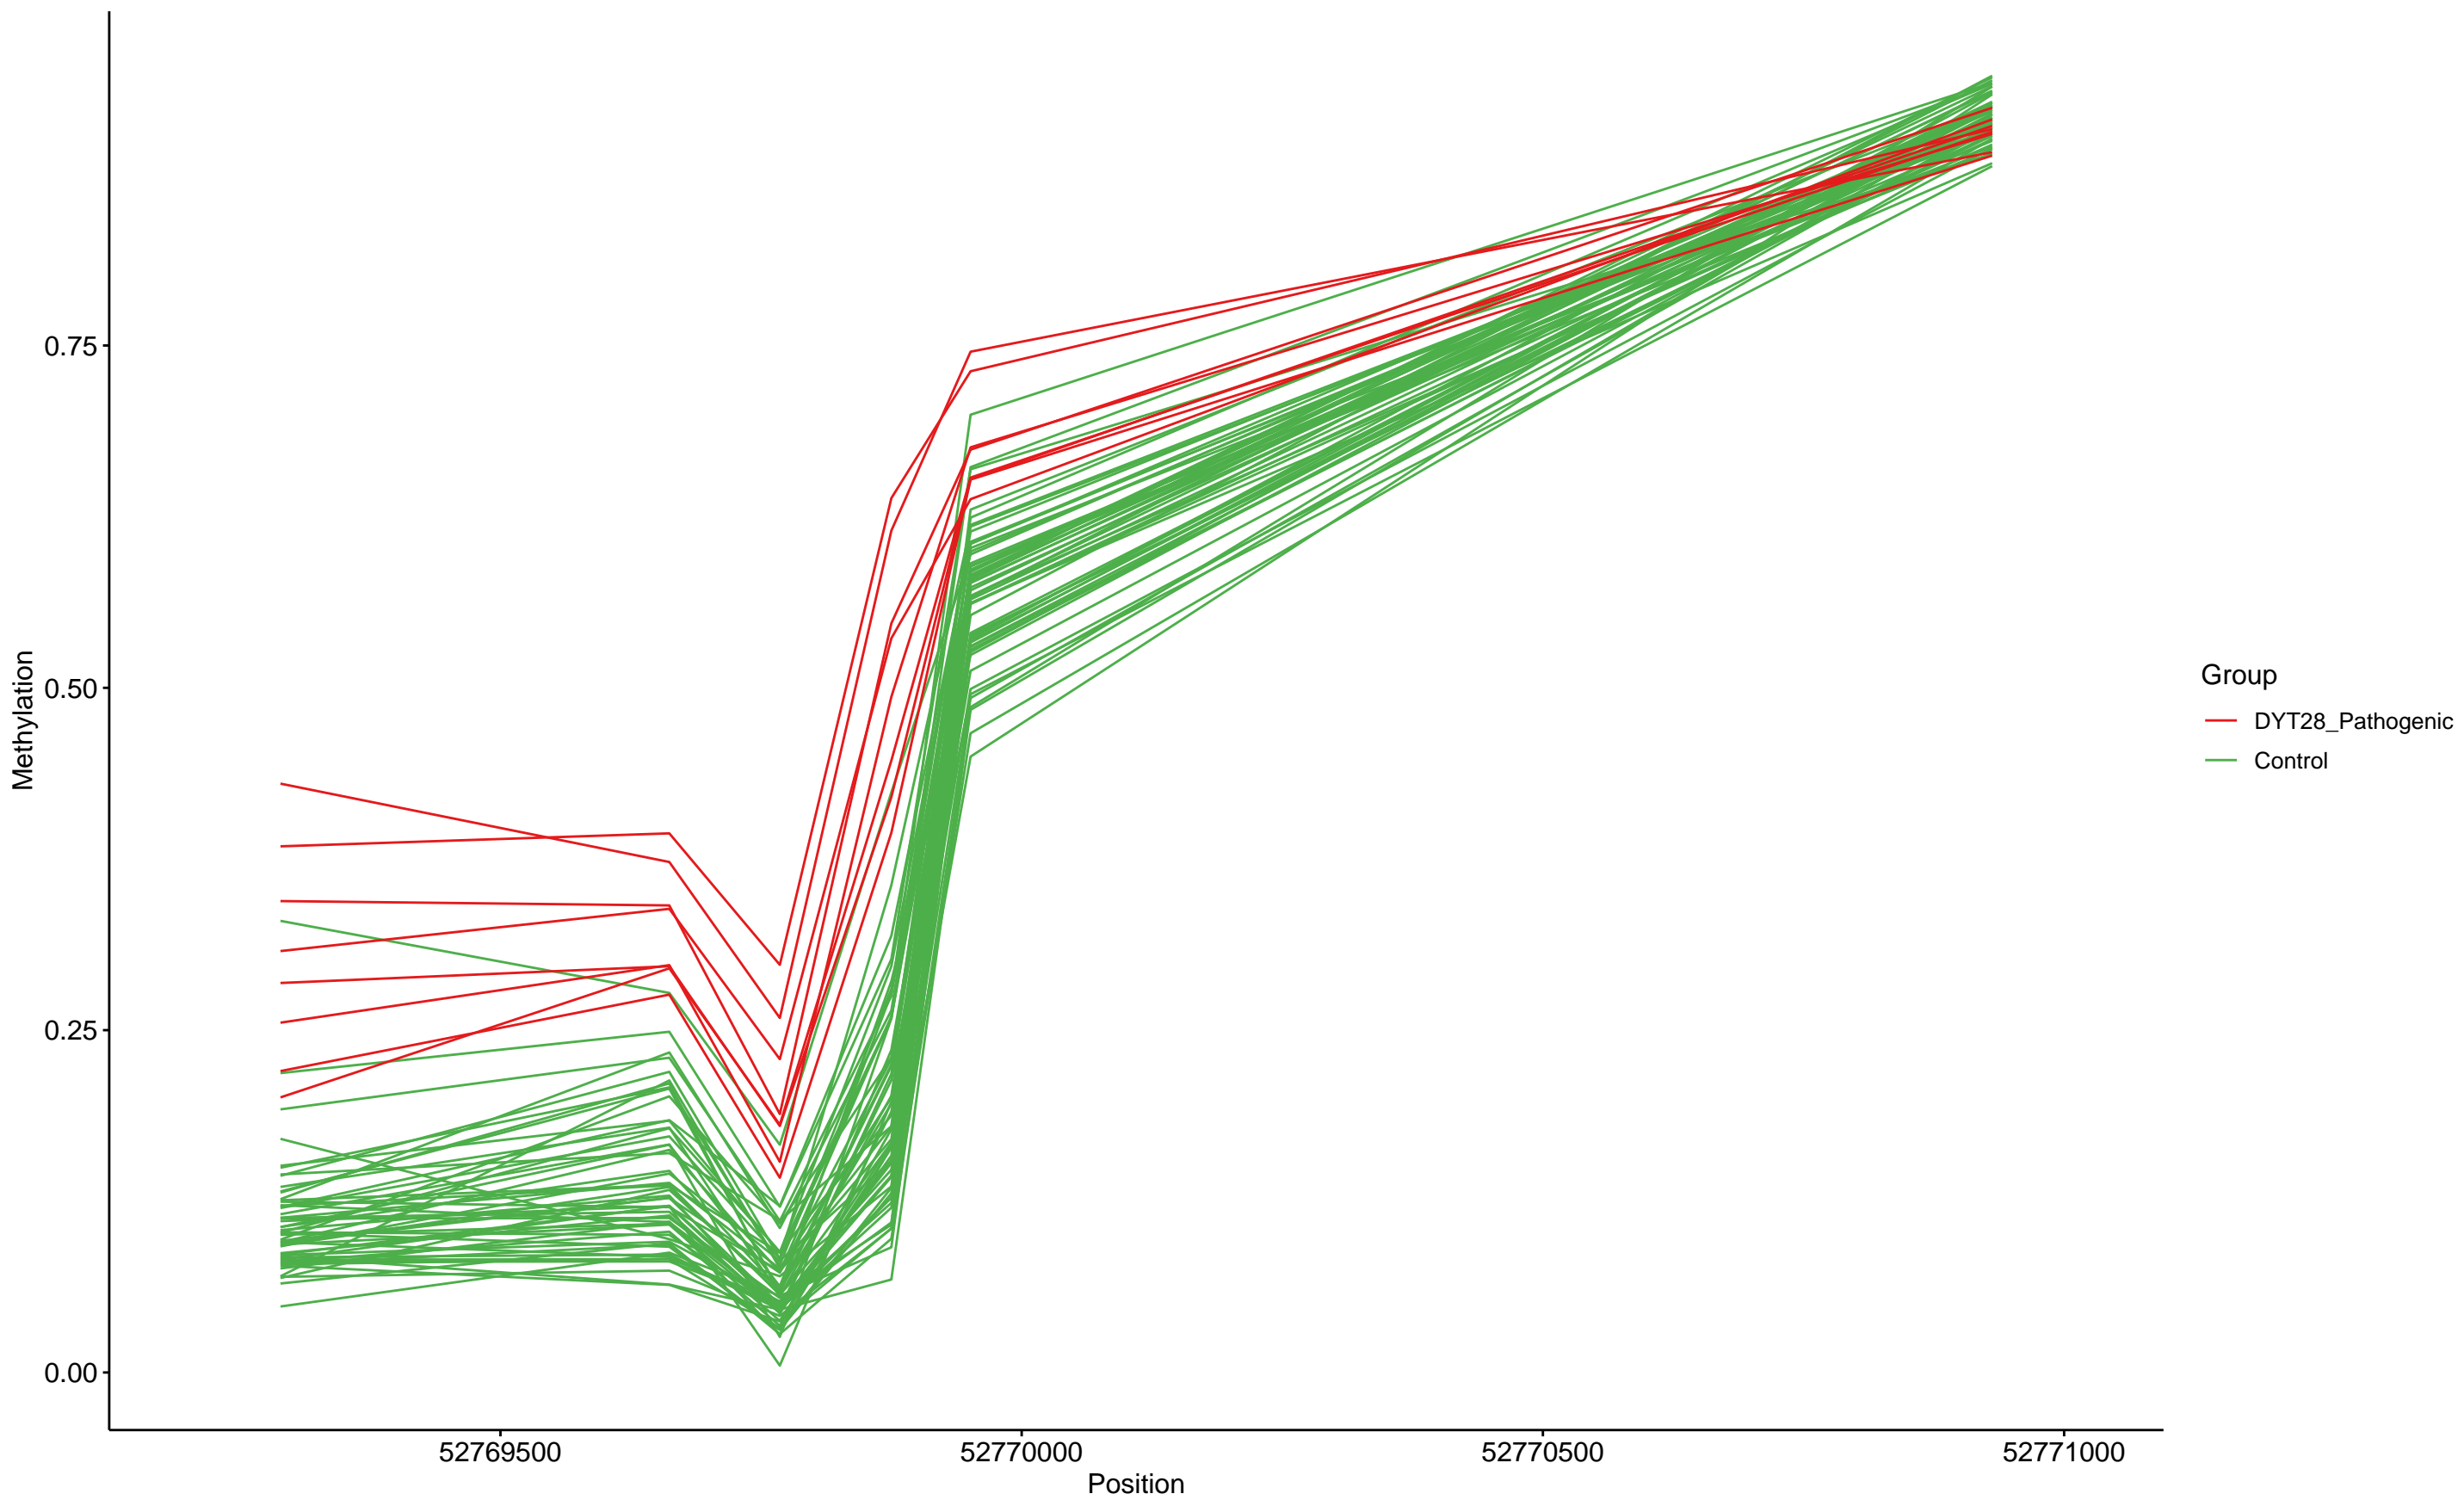

Region 76: chr15:69744390–69745844

Fisher: 5.73363569617118e-34

Stouffer: 3.60579726408575e-21

Mean difference: 0.103471004550918

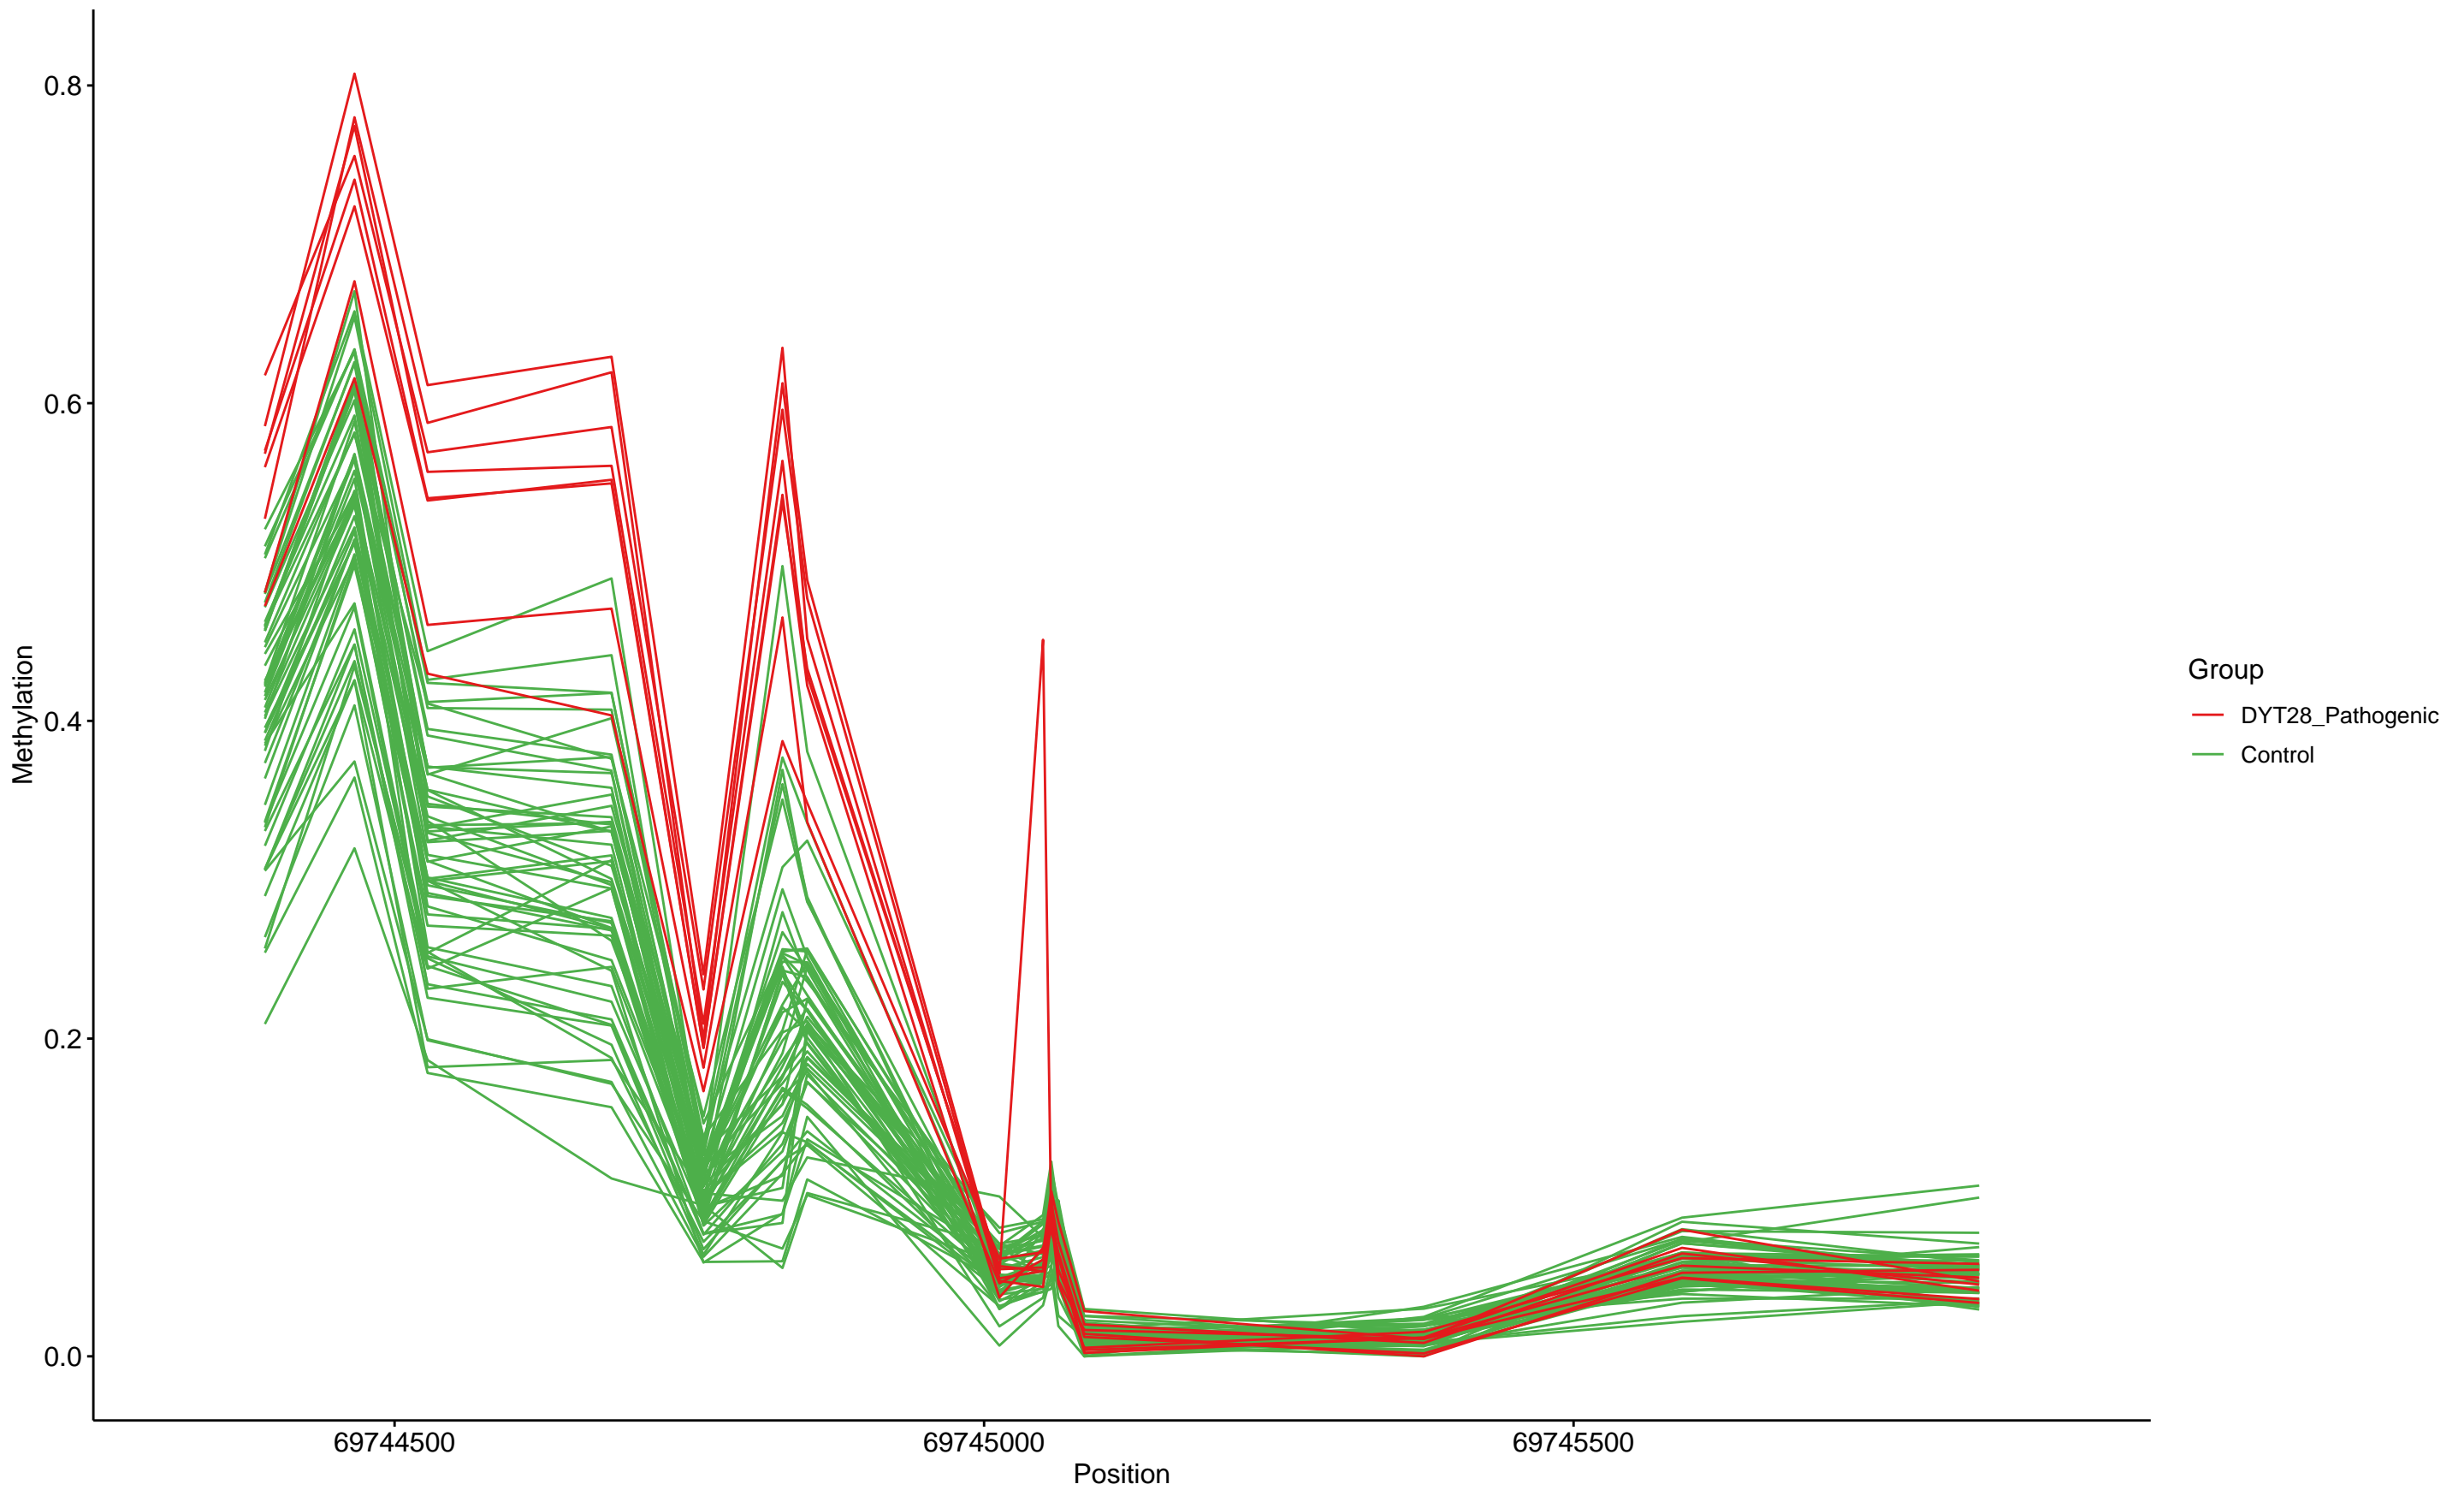



Region 77: chr1:155264372–155265378

Fisher:  $9.81115122844743e-34$

Stouffer:  $1.56928471058074e-34$

Mean difference: 0.112946142839369

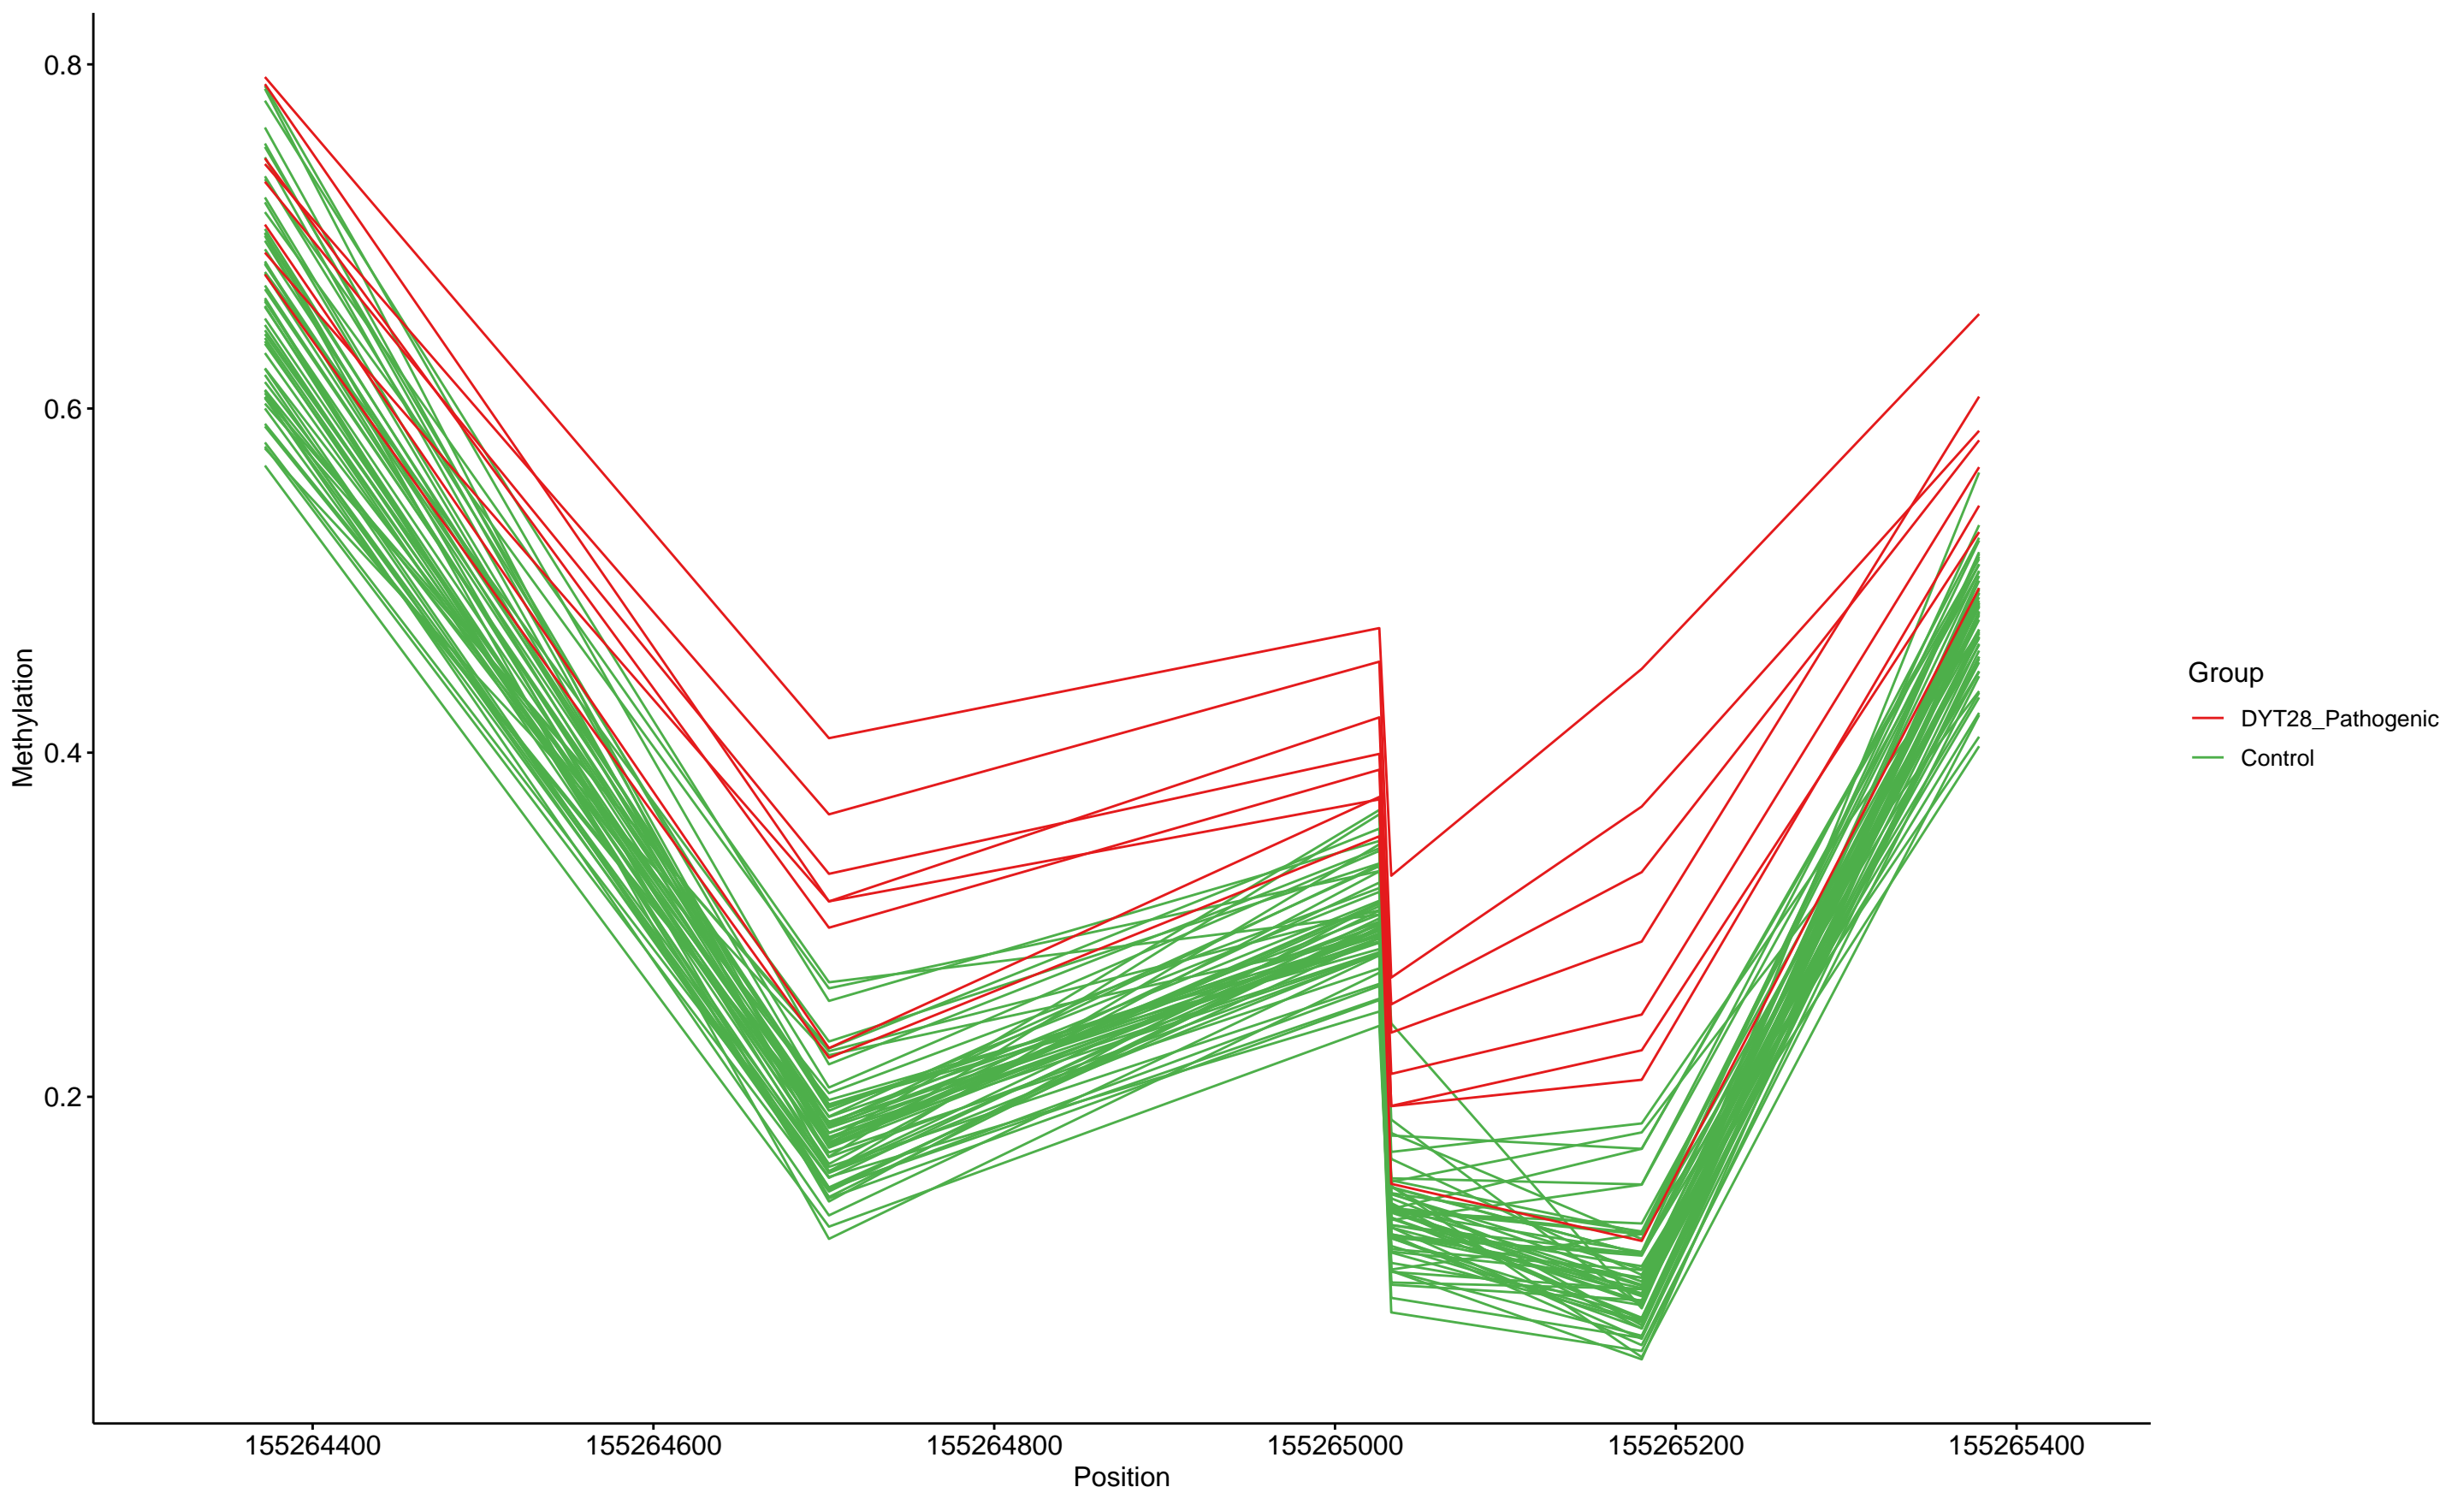

Region 78: chr1:227746111-227748696

Fisher: 1.22584190498588e-33

Stouffer: 2.938950591615e-34

Mean difference: 0.138462202139473

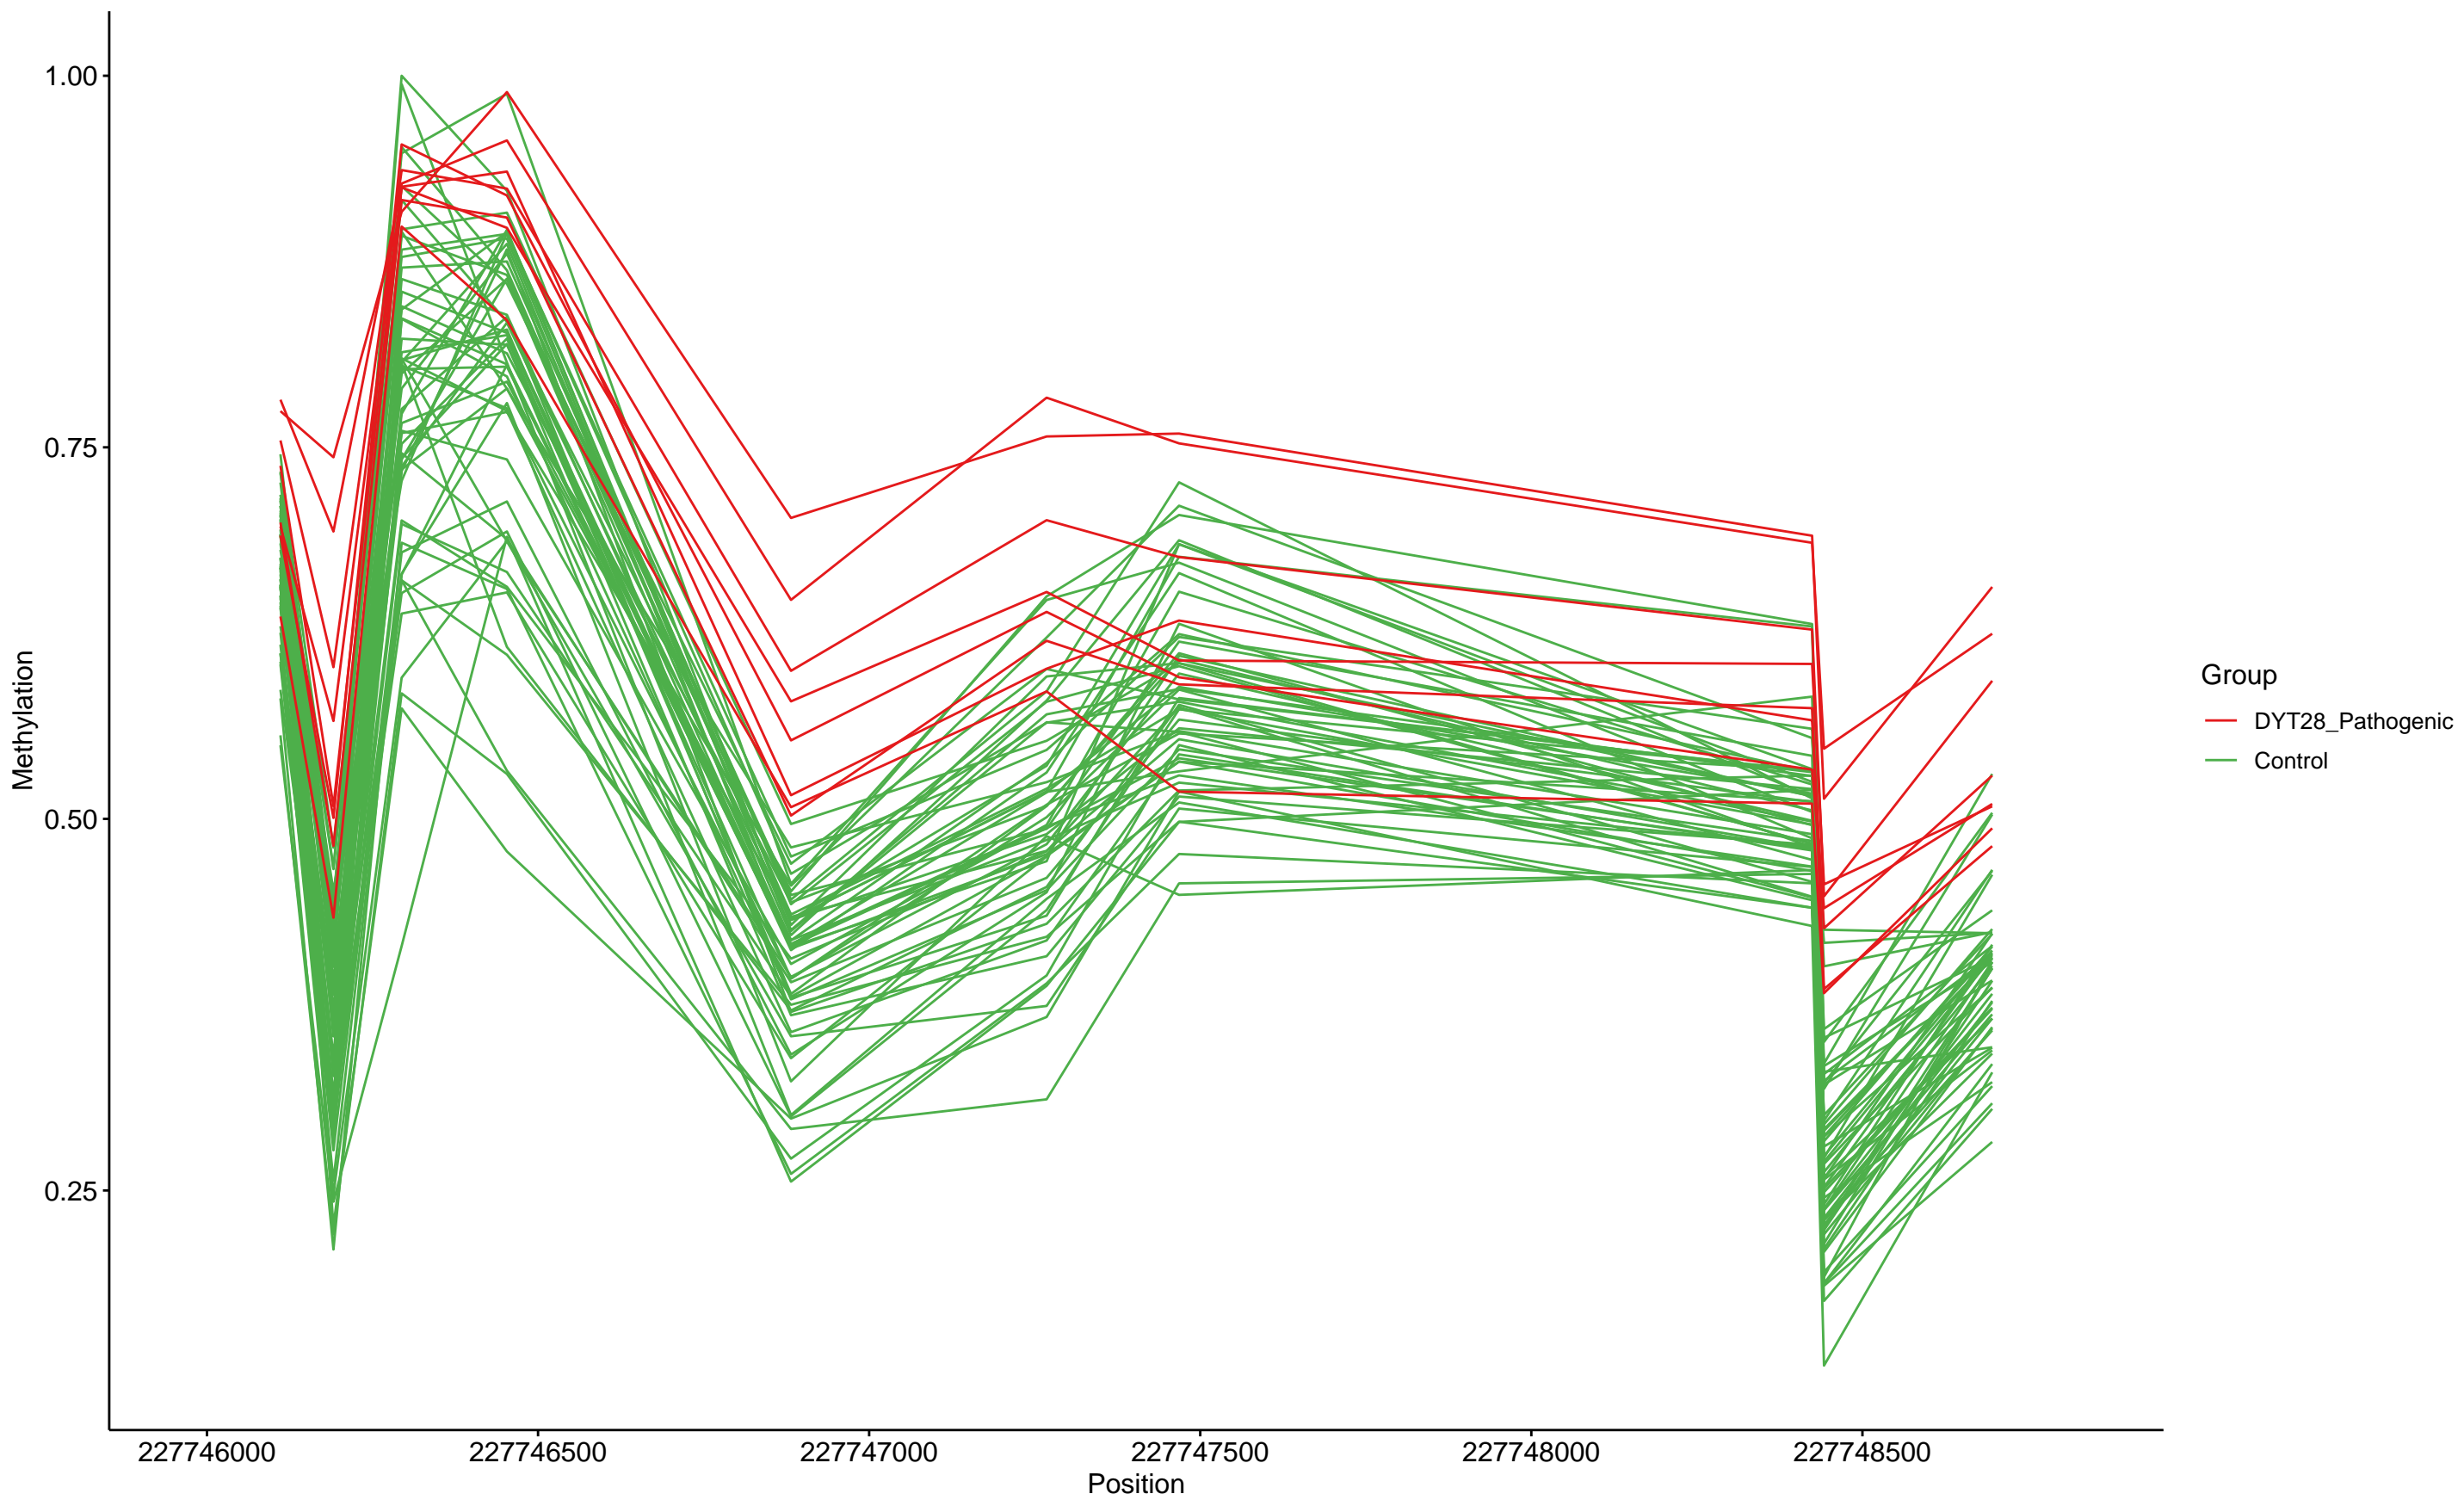

Region 79: chr1:178455607-178456270

Fisher:  $2.51340330578233e-32$

Stouffer:  $1.13671662292763e-26$

Mean difference: 0.150027594526061

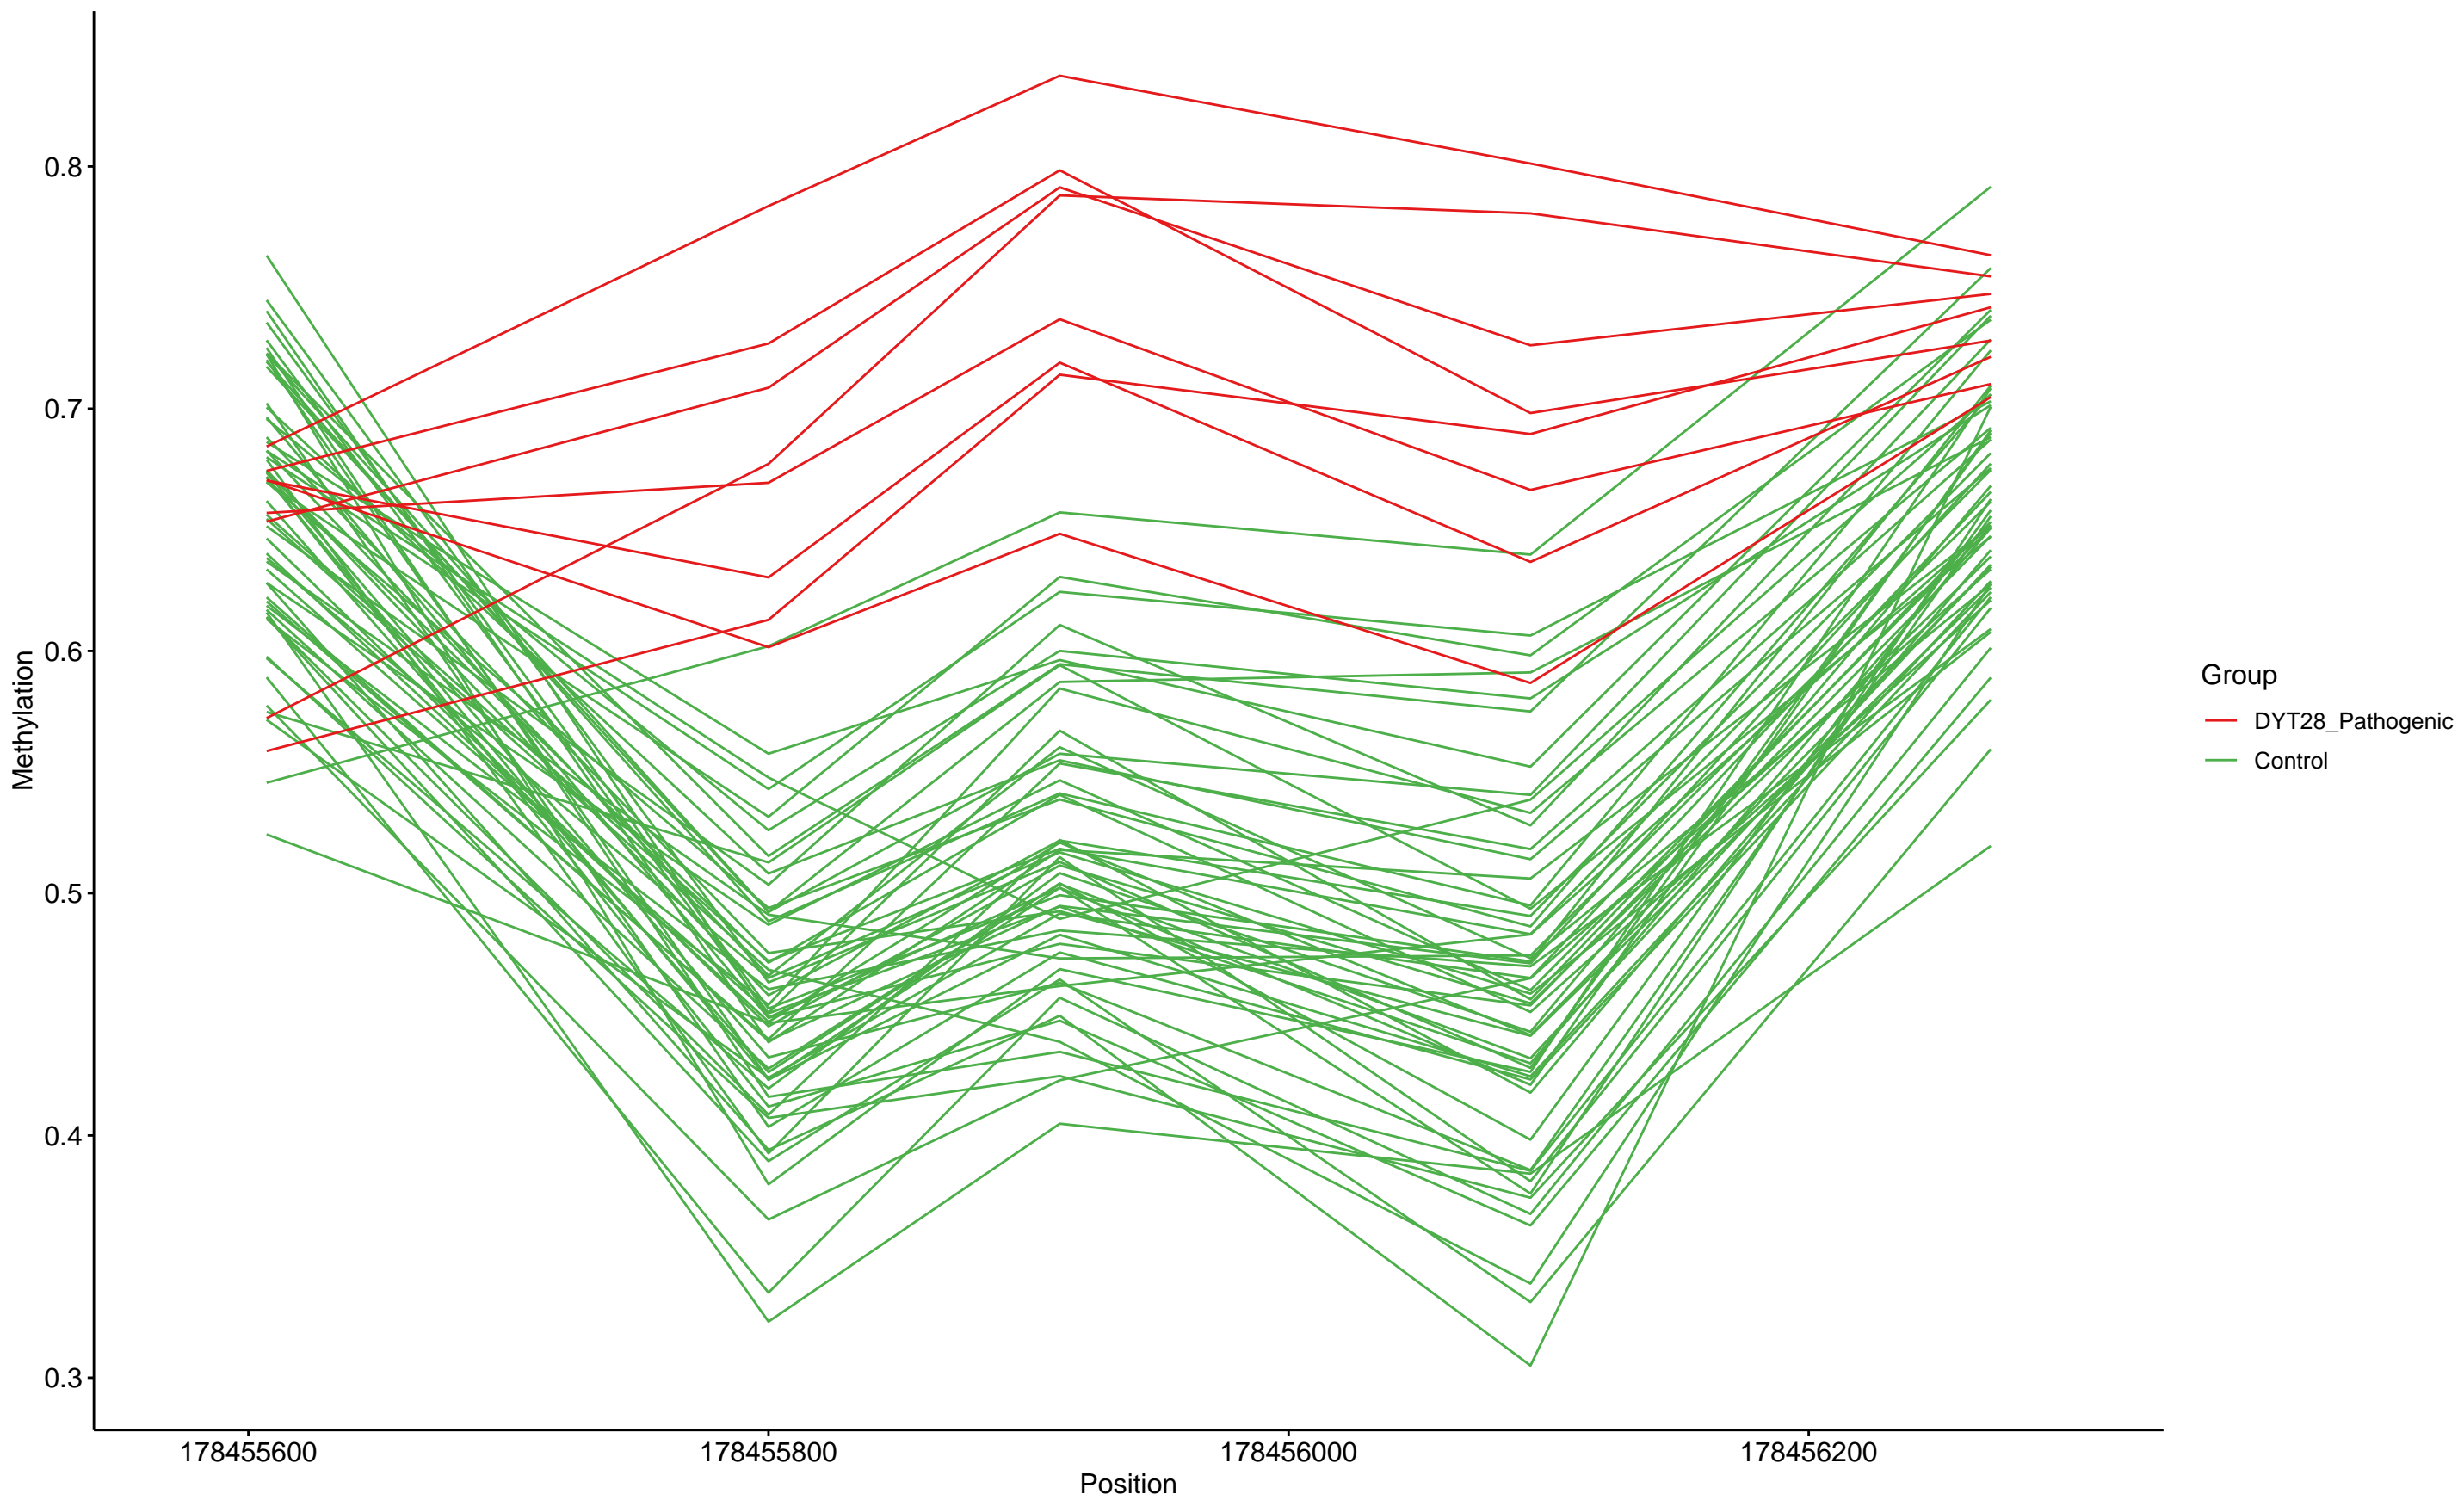



Region 80: chr5:126408756–126410348

Fisher: 3.65713980583759e-32

Stouffer: 1.48244664693489e-28

Mean difference: 0.110493277992197

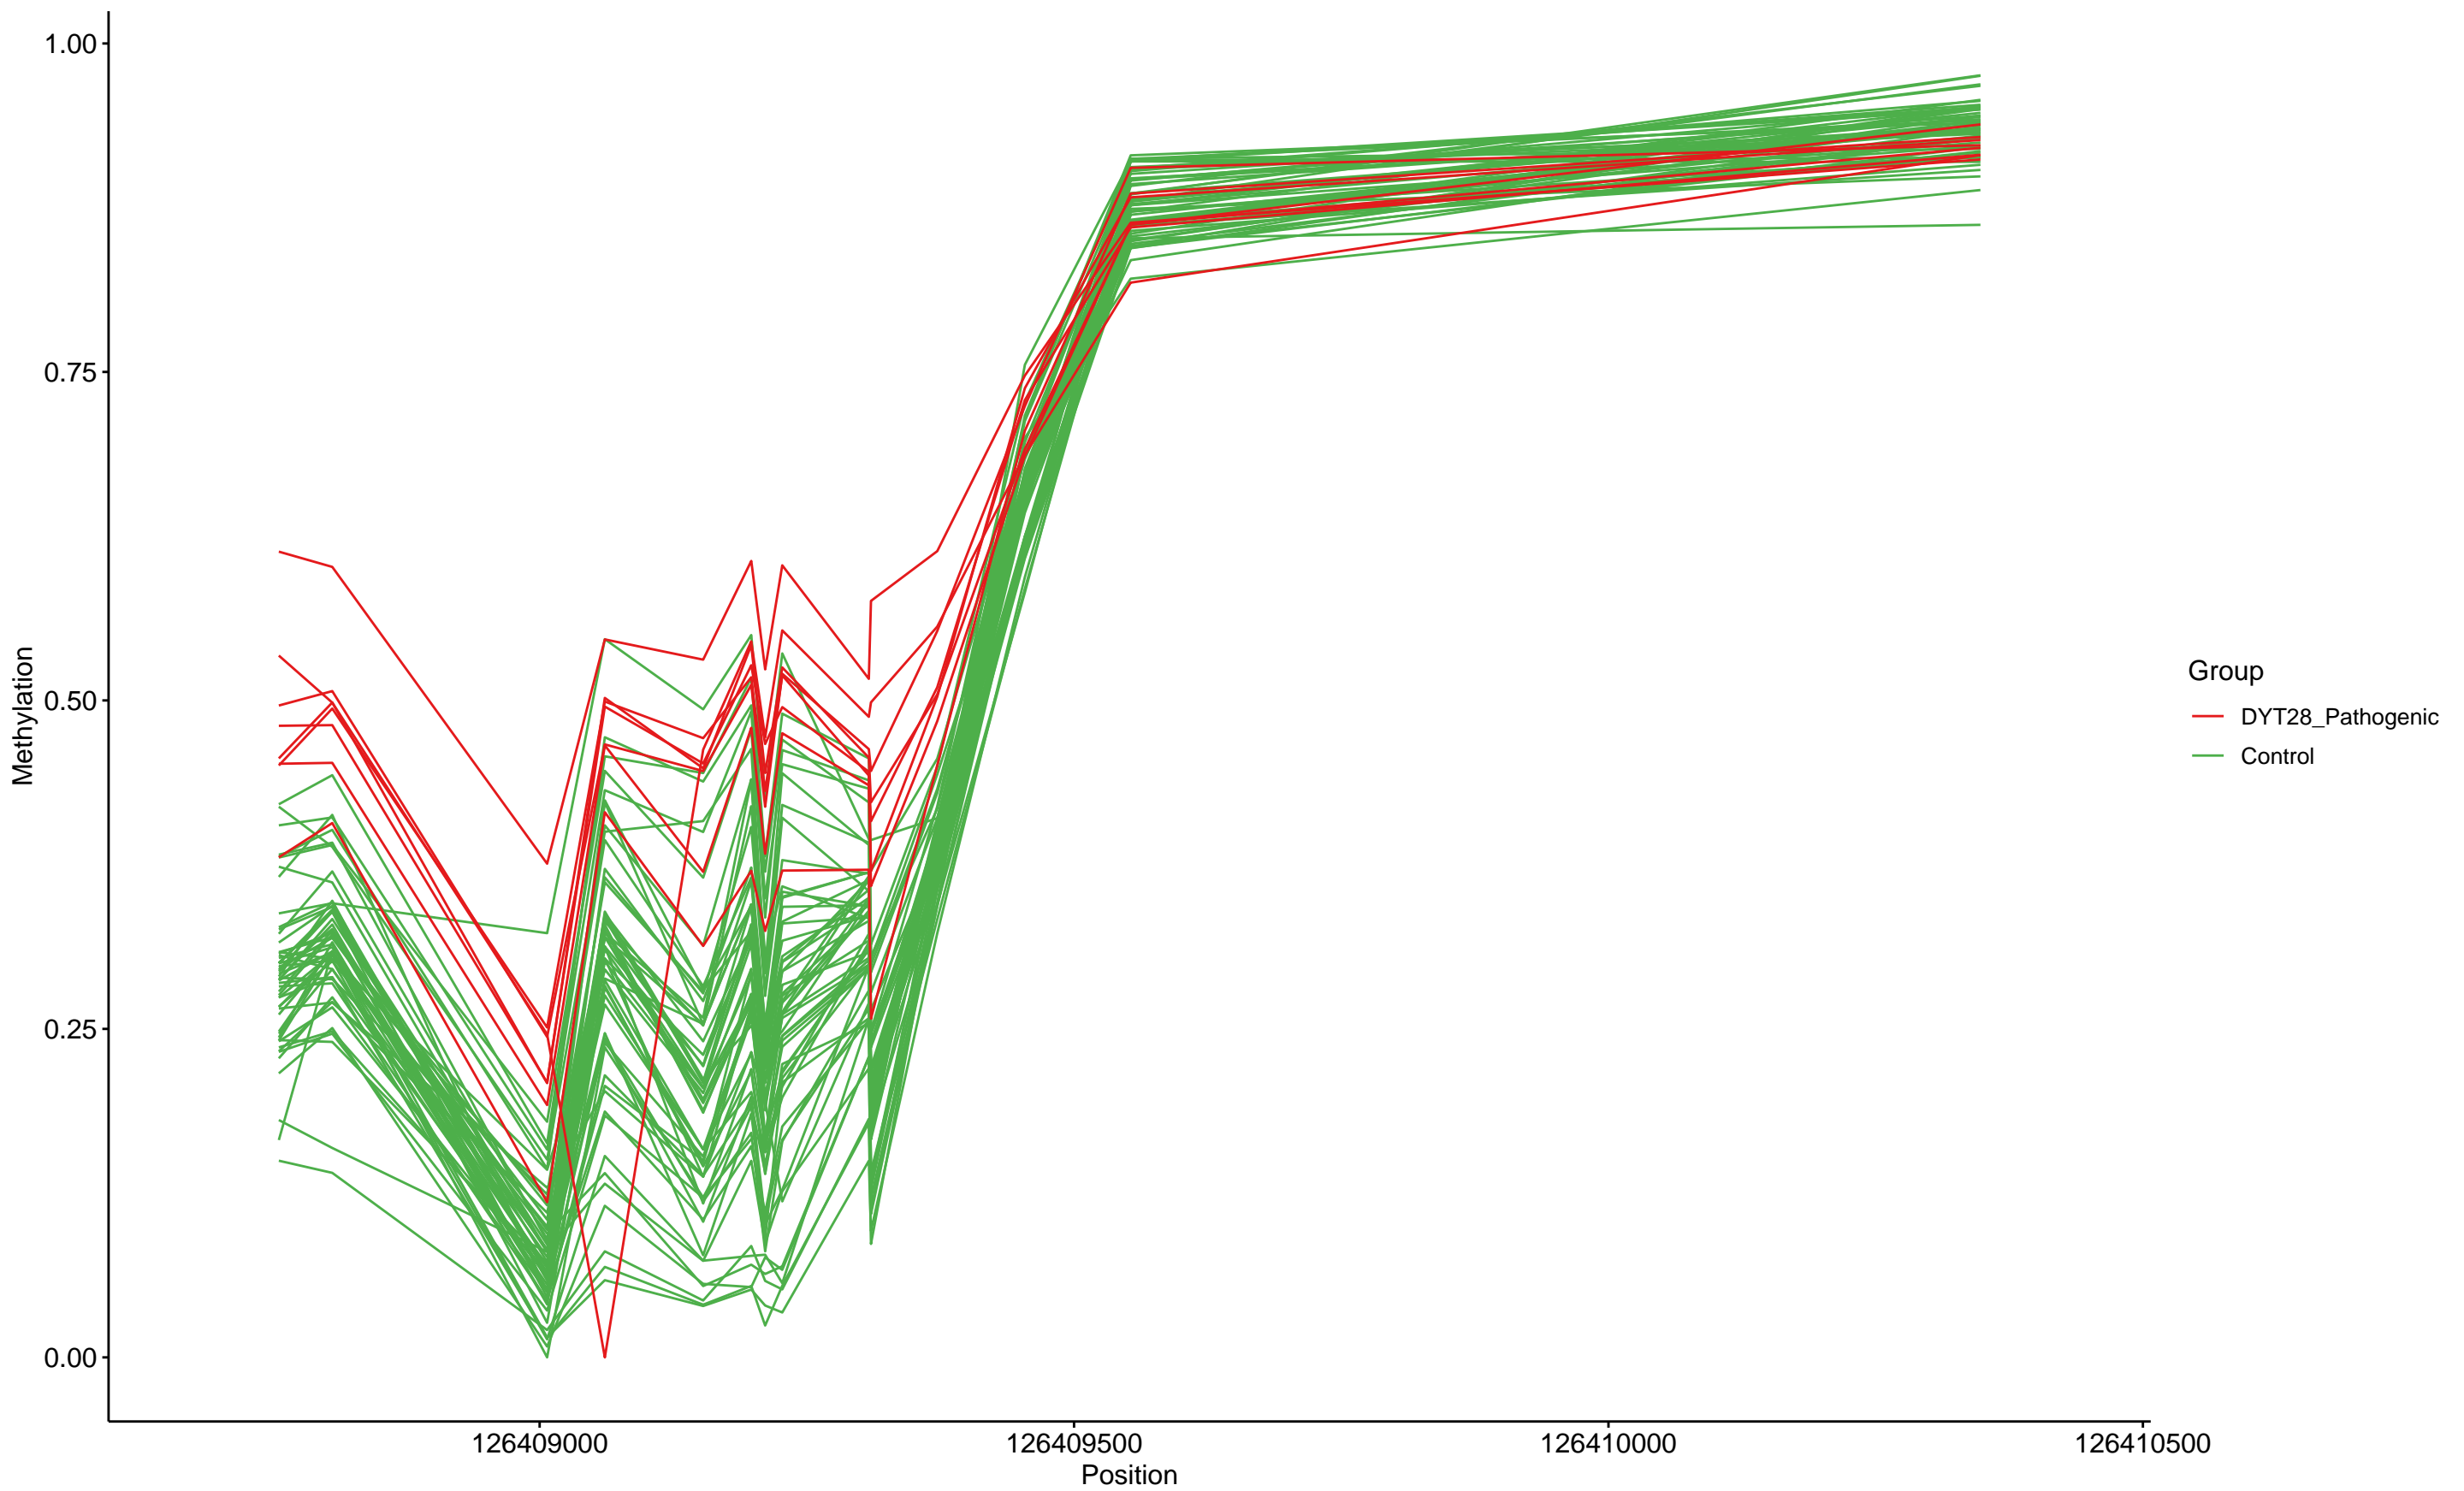



Region 81: chr17:40936078–40937908

Fisher: 4.49233665440843e-32

Stouffer: 2.07063429404808e-36

Mean difference: 0.108497079568782

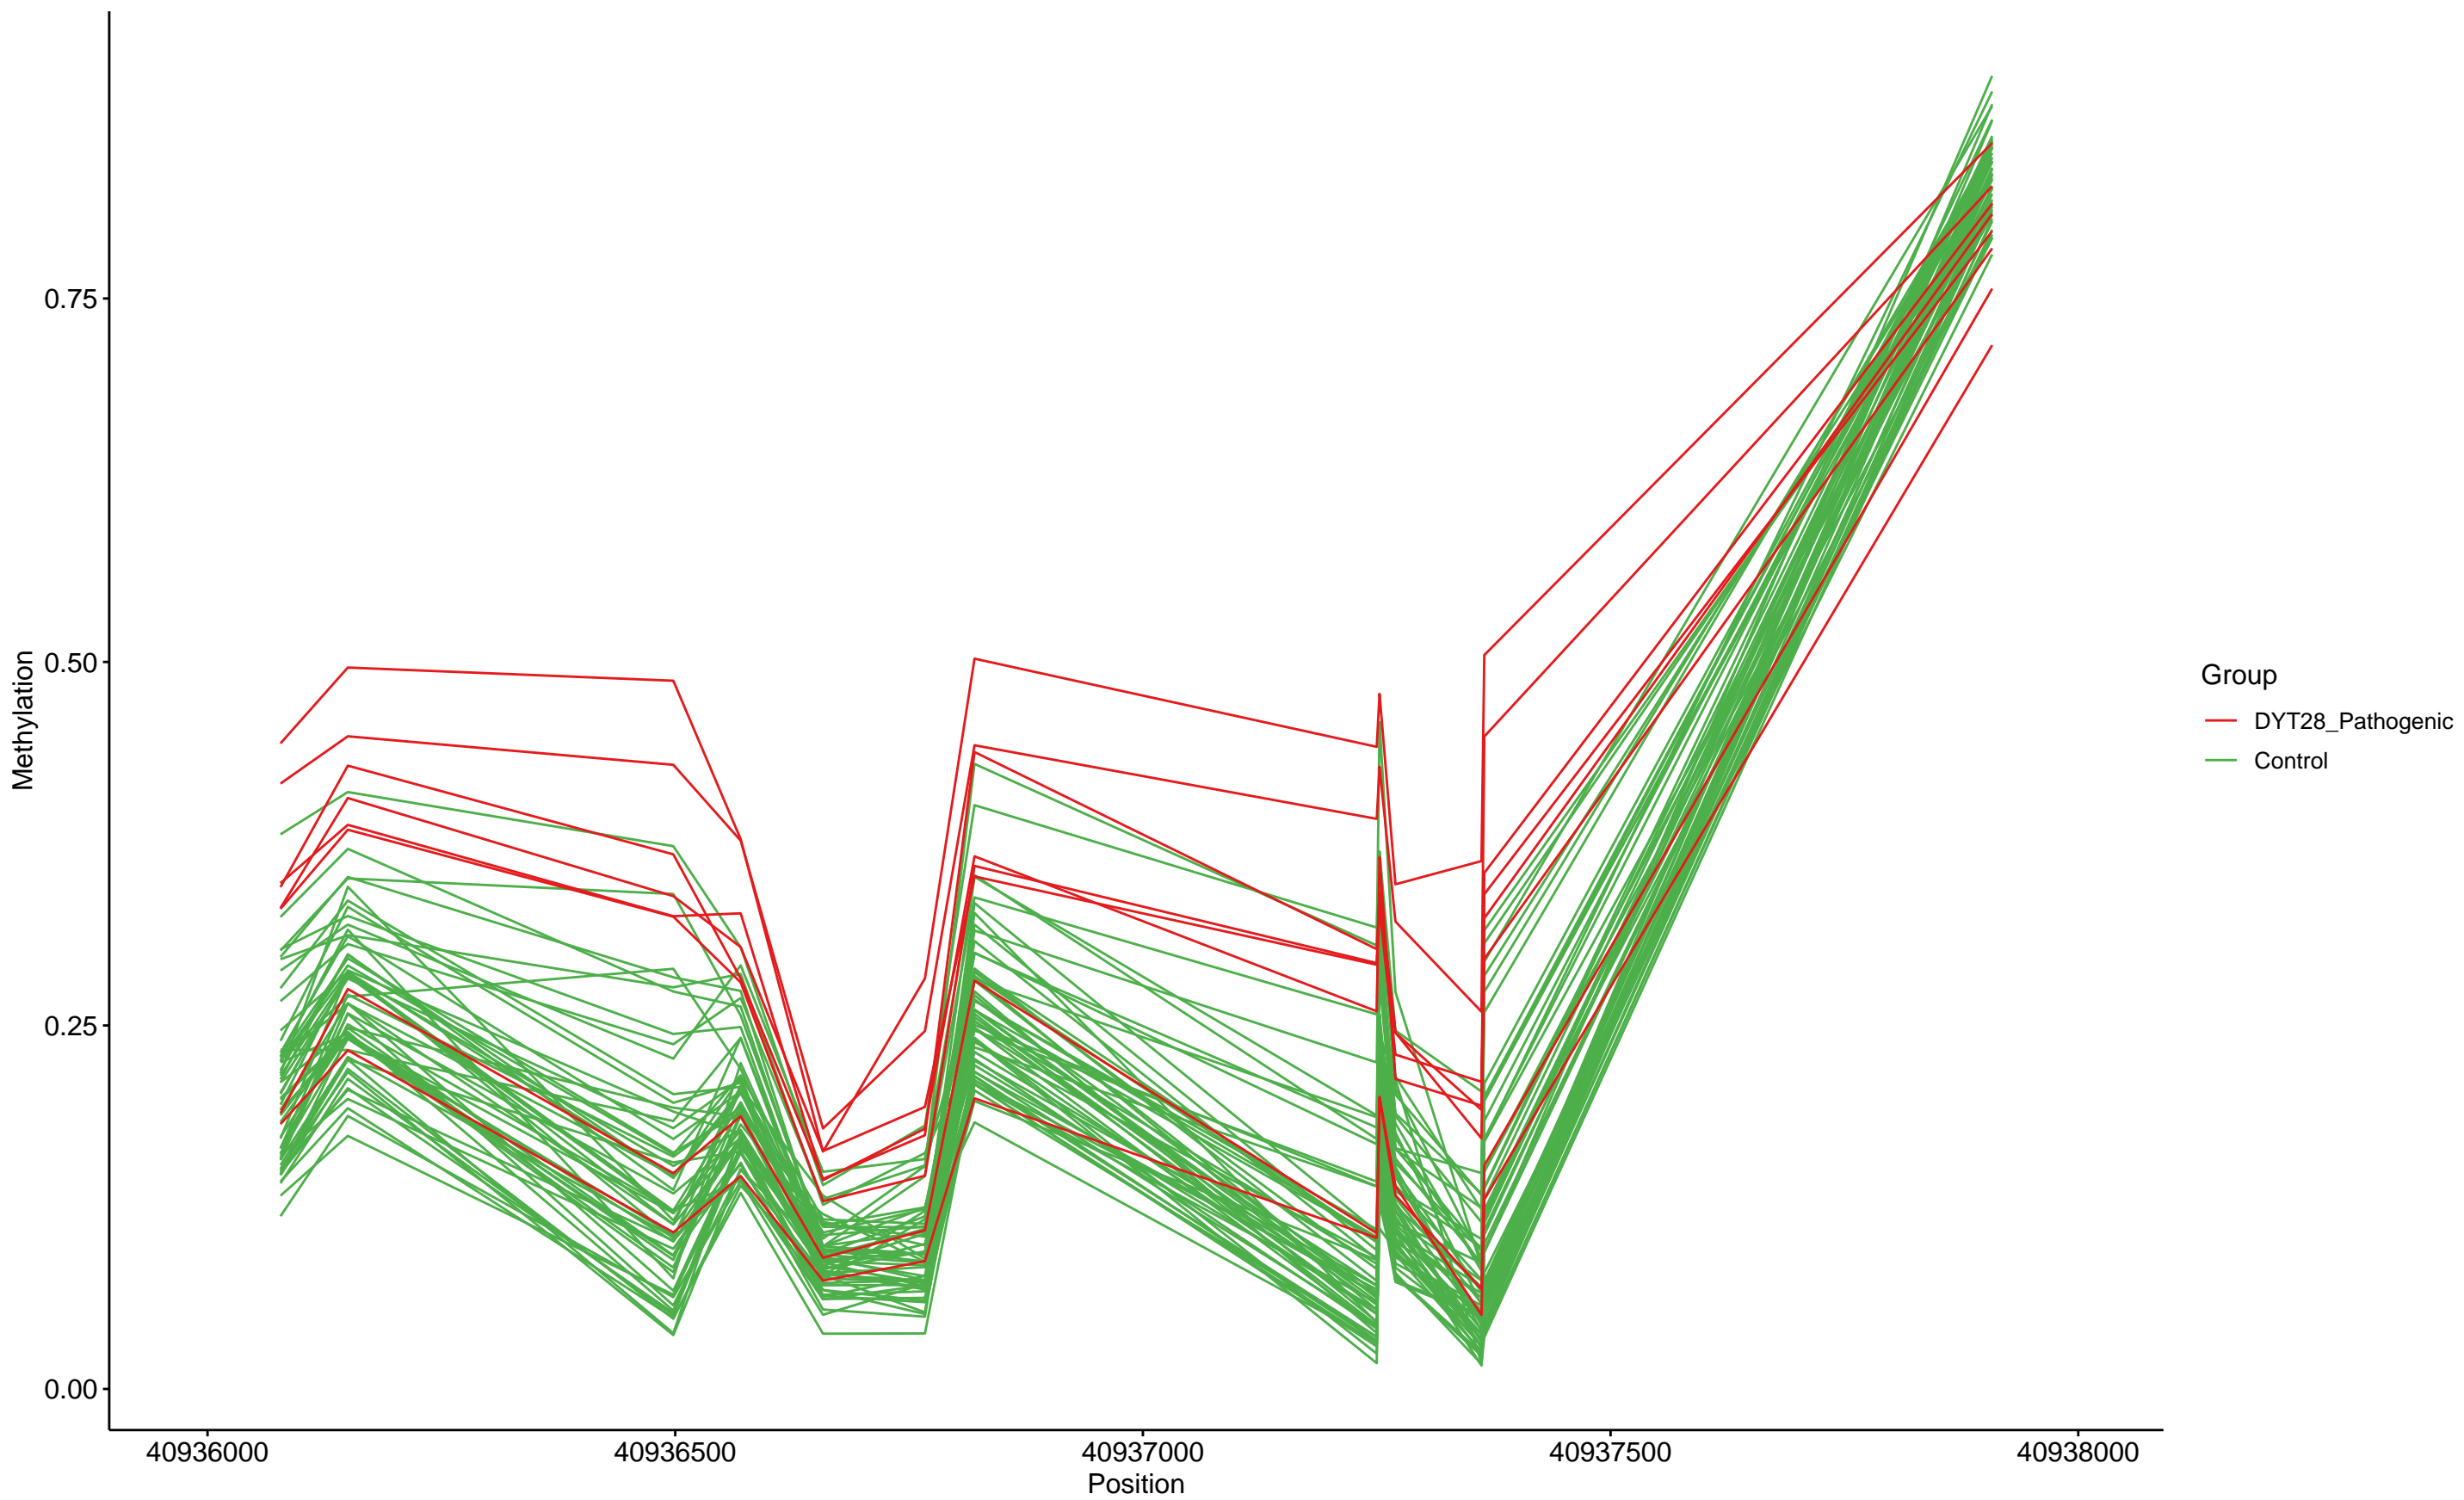

Region 82: chr7:117854280–117854765

Fisher: 1.79646708684635e-31

Stouffer: 1.13100574057153e-33

Mean difference: 0.127966464616869

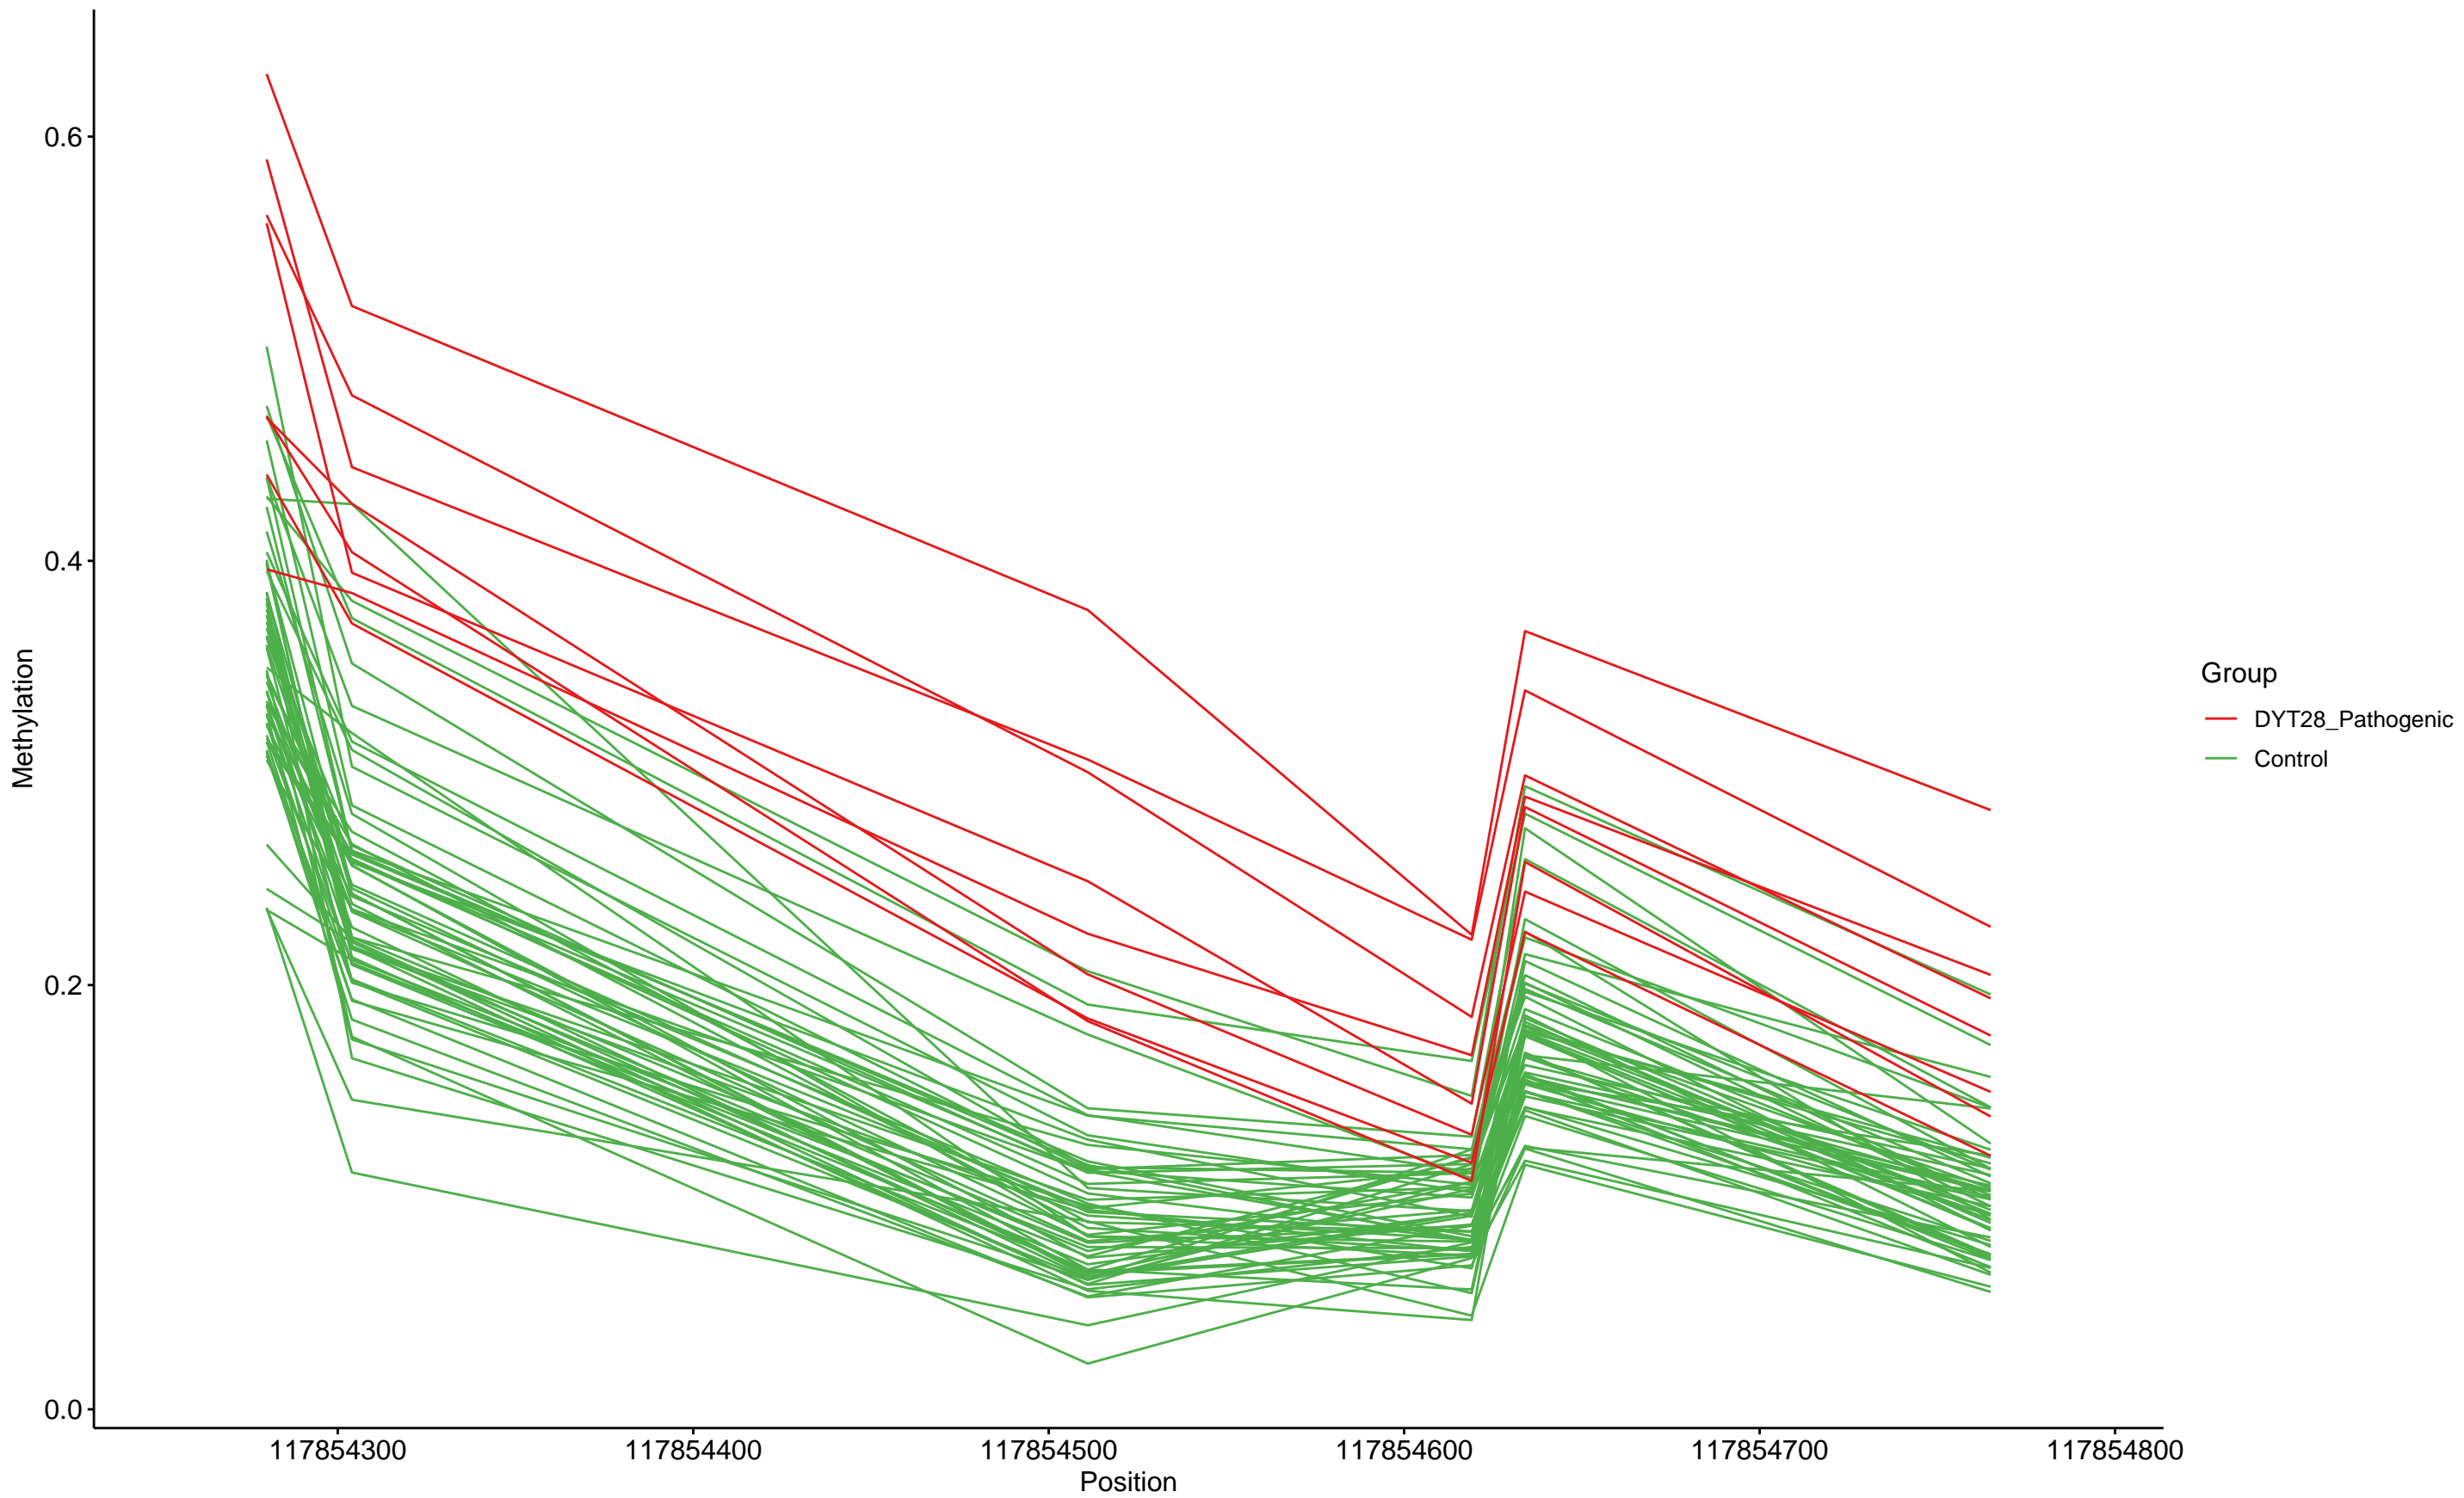

Region 83: chr1:19614429–19615702

Fisher: 1.86549872709111e-31

Stouffer: 1.18922113587912e-27

Mean difference: 0.113050110211339

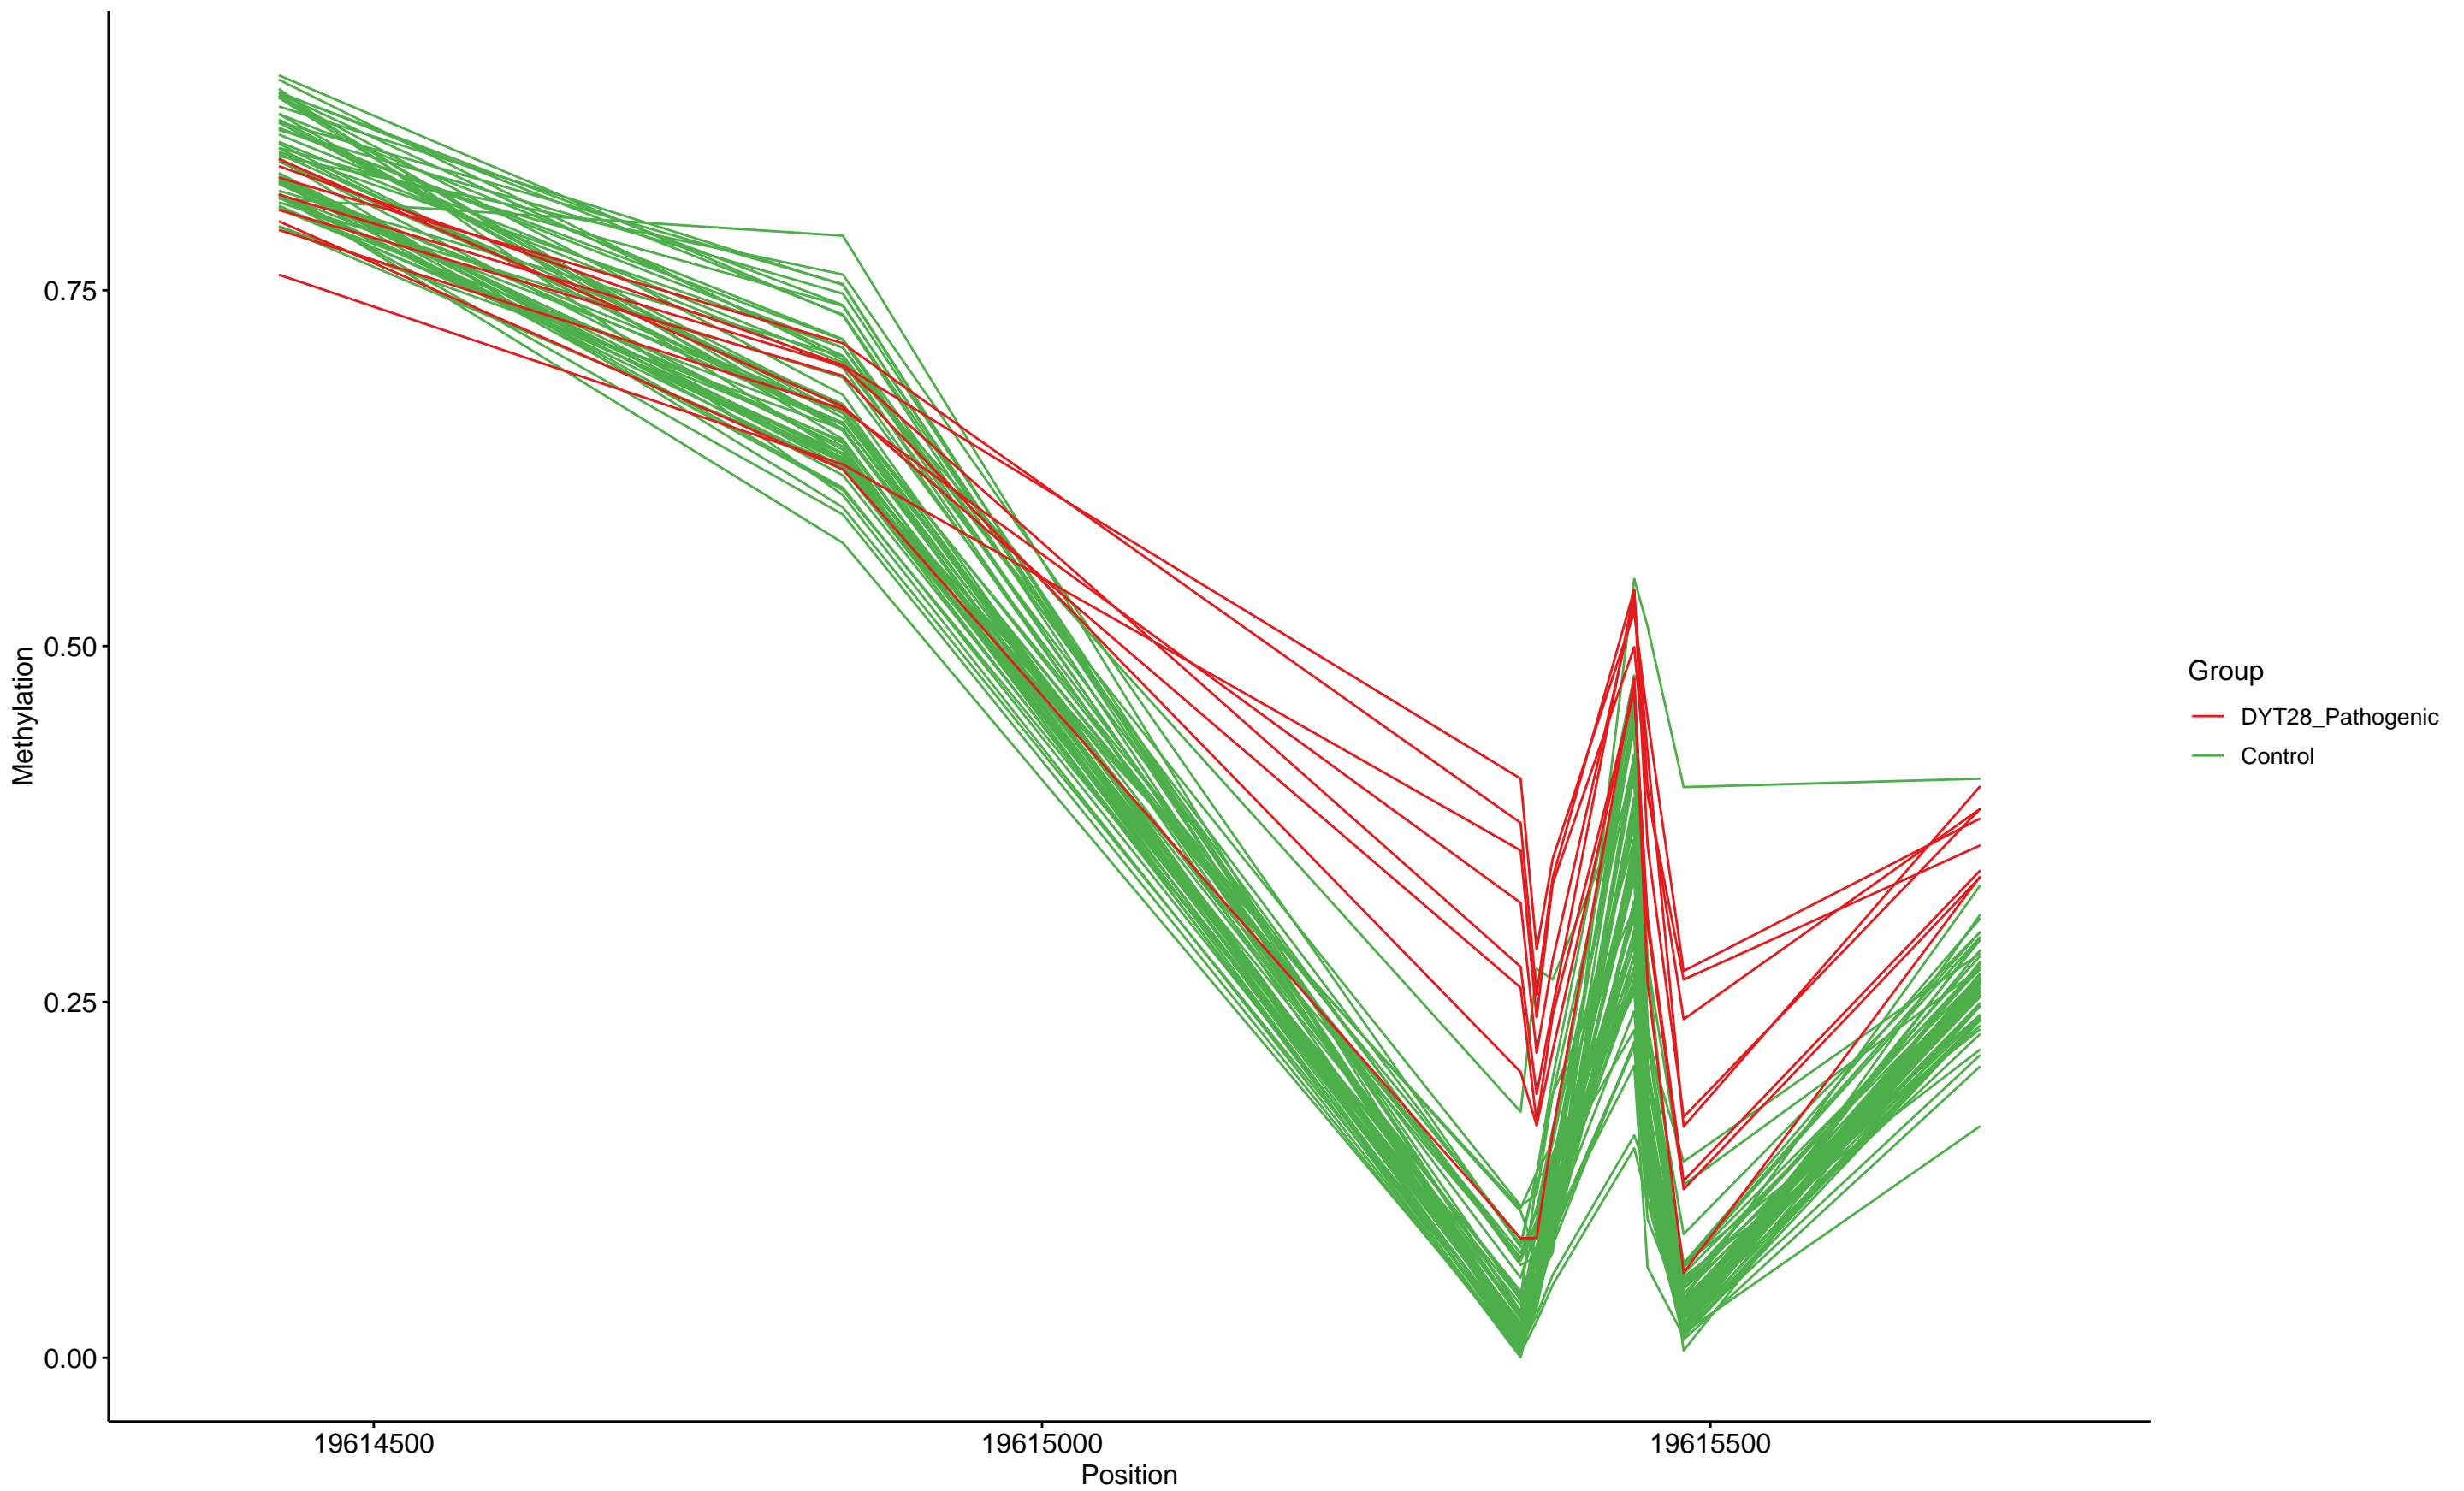



Region 84: chr11:27015473–27016671

Fisher:  $2.63293081155331e-31$

Stouffer:  $3.61004128740712e-30$

Mean difference: 0.127240217905358

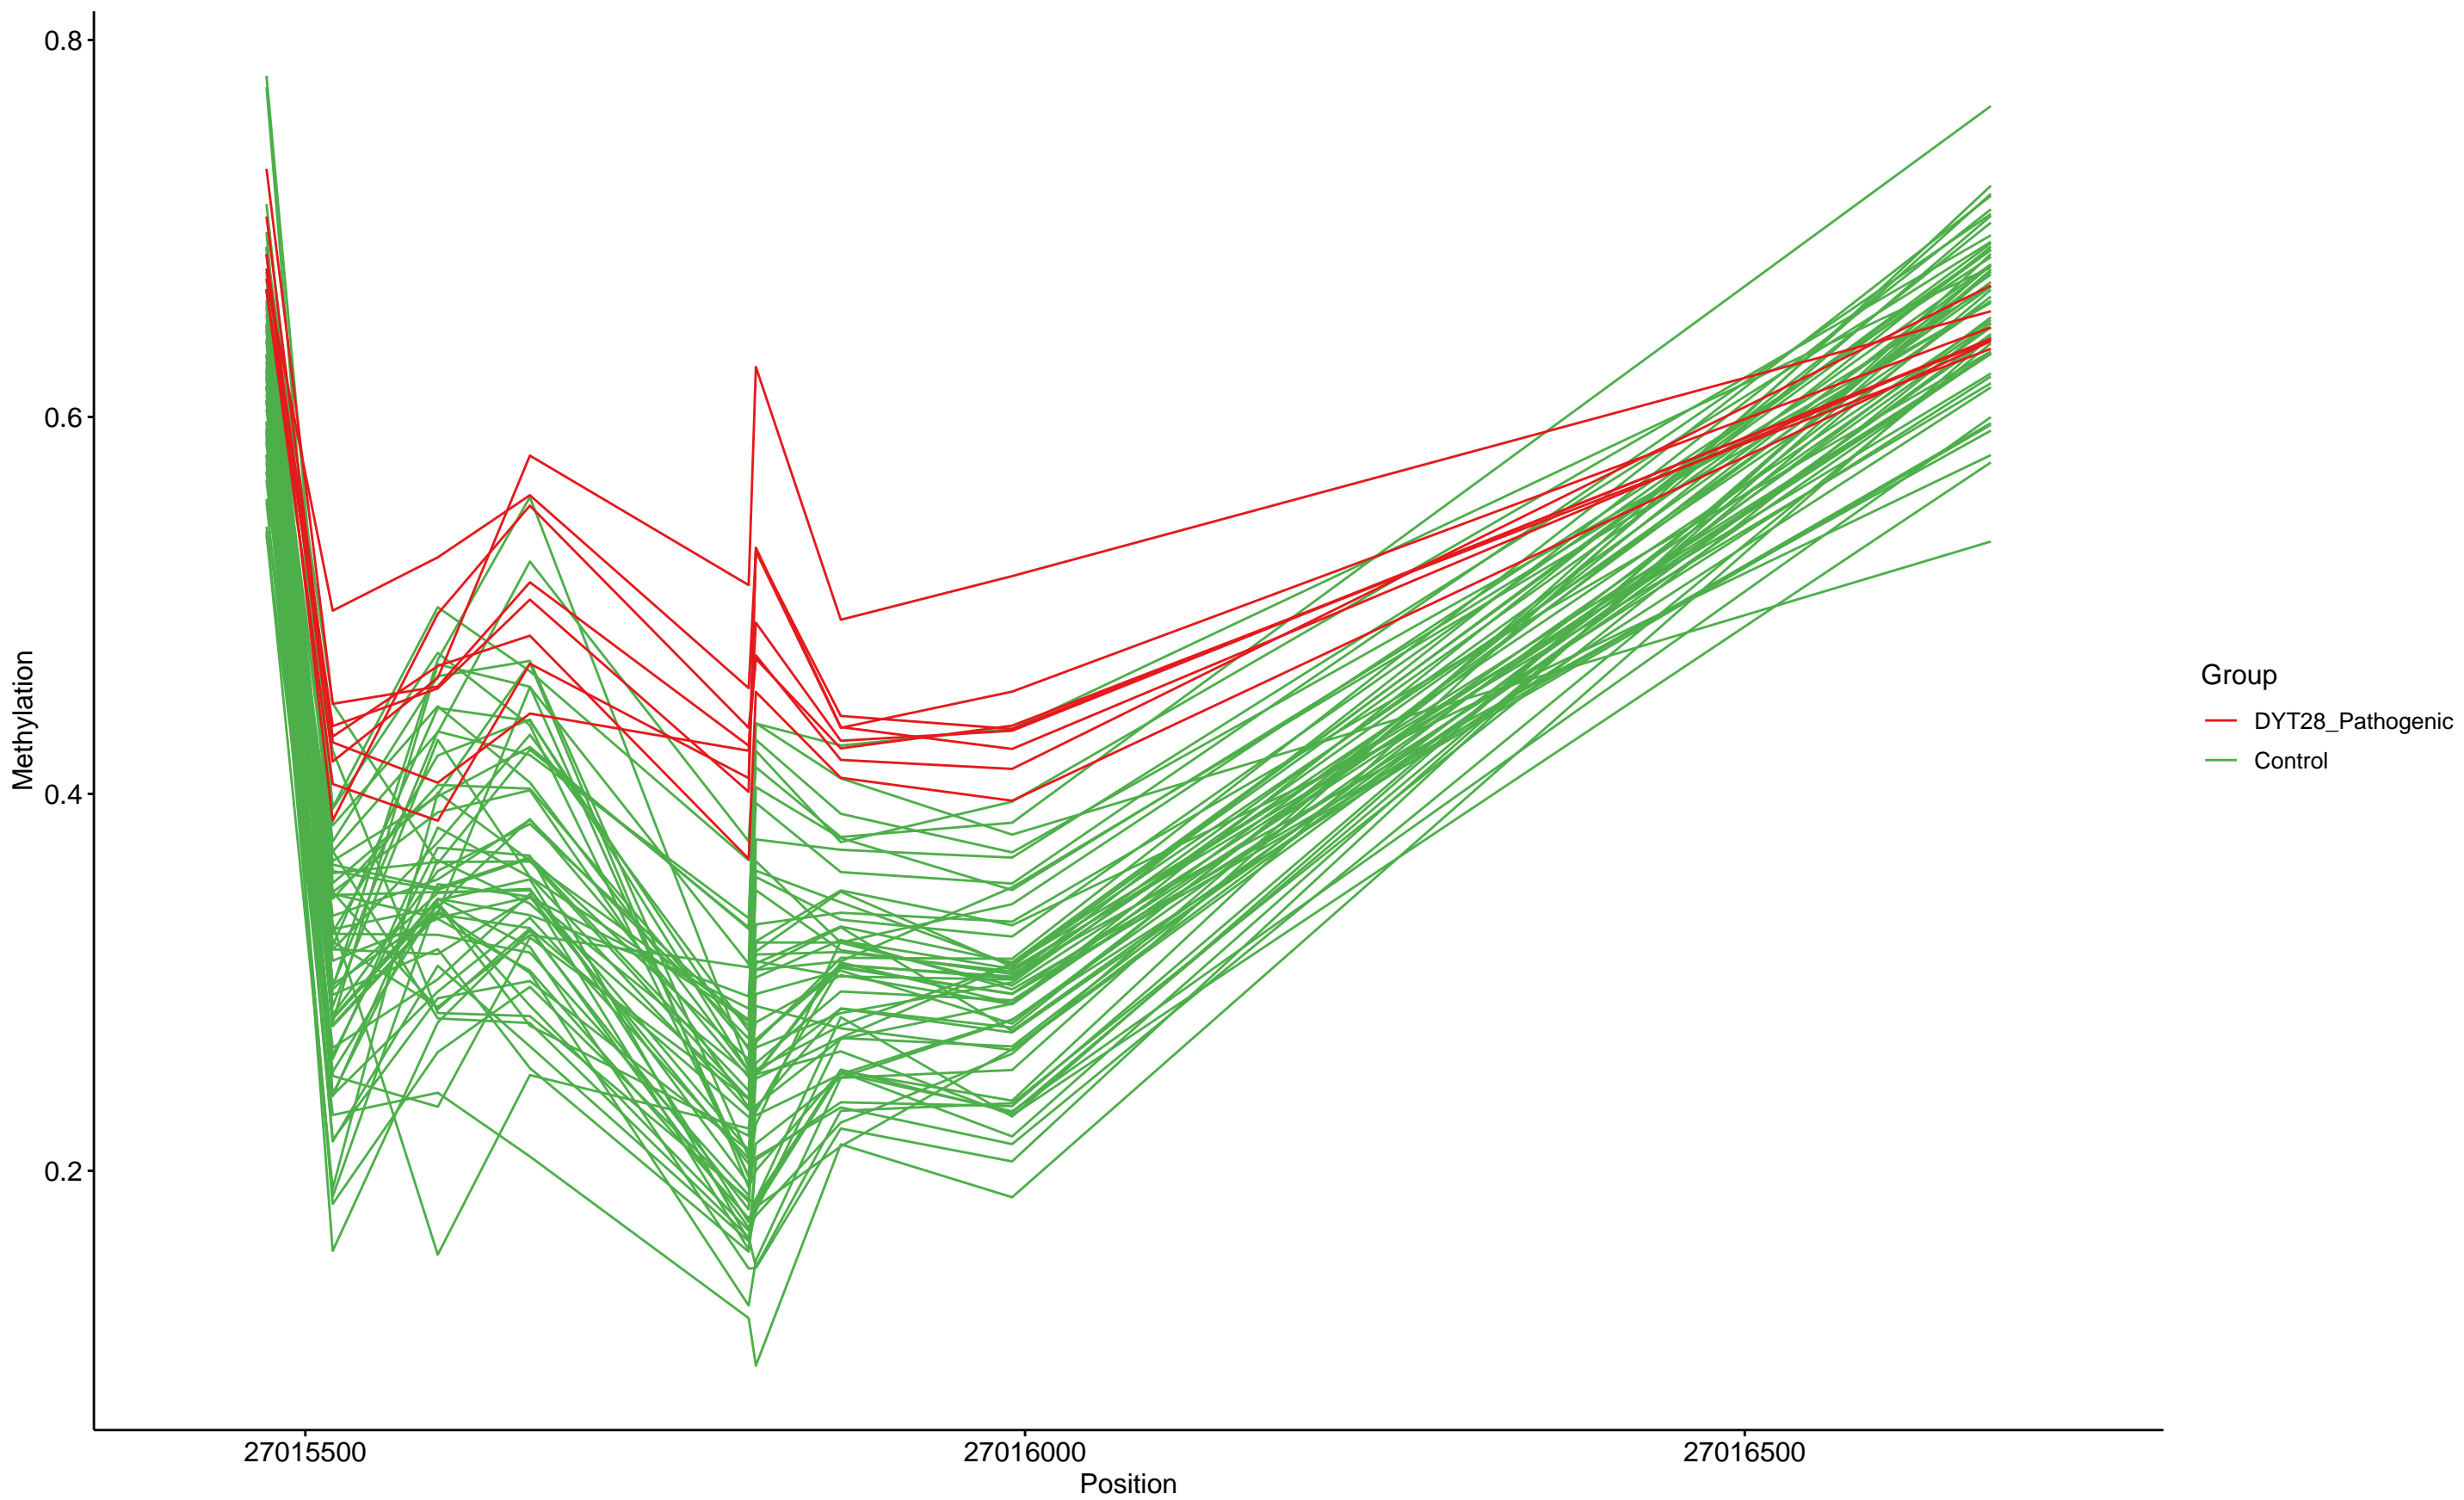



Region 85: chr14:78107677-78108822

Fisher: 3.28749917464424e-31

Stouffer: 1.14591107669577e-31

Mean difference: 0.158271426784613

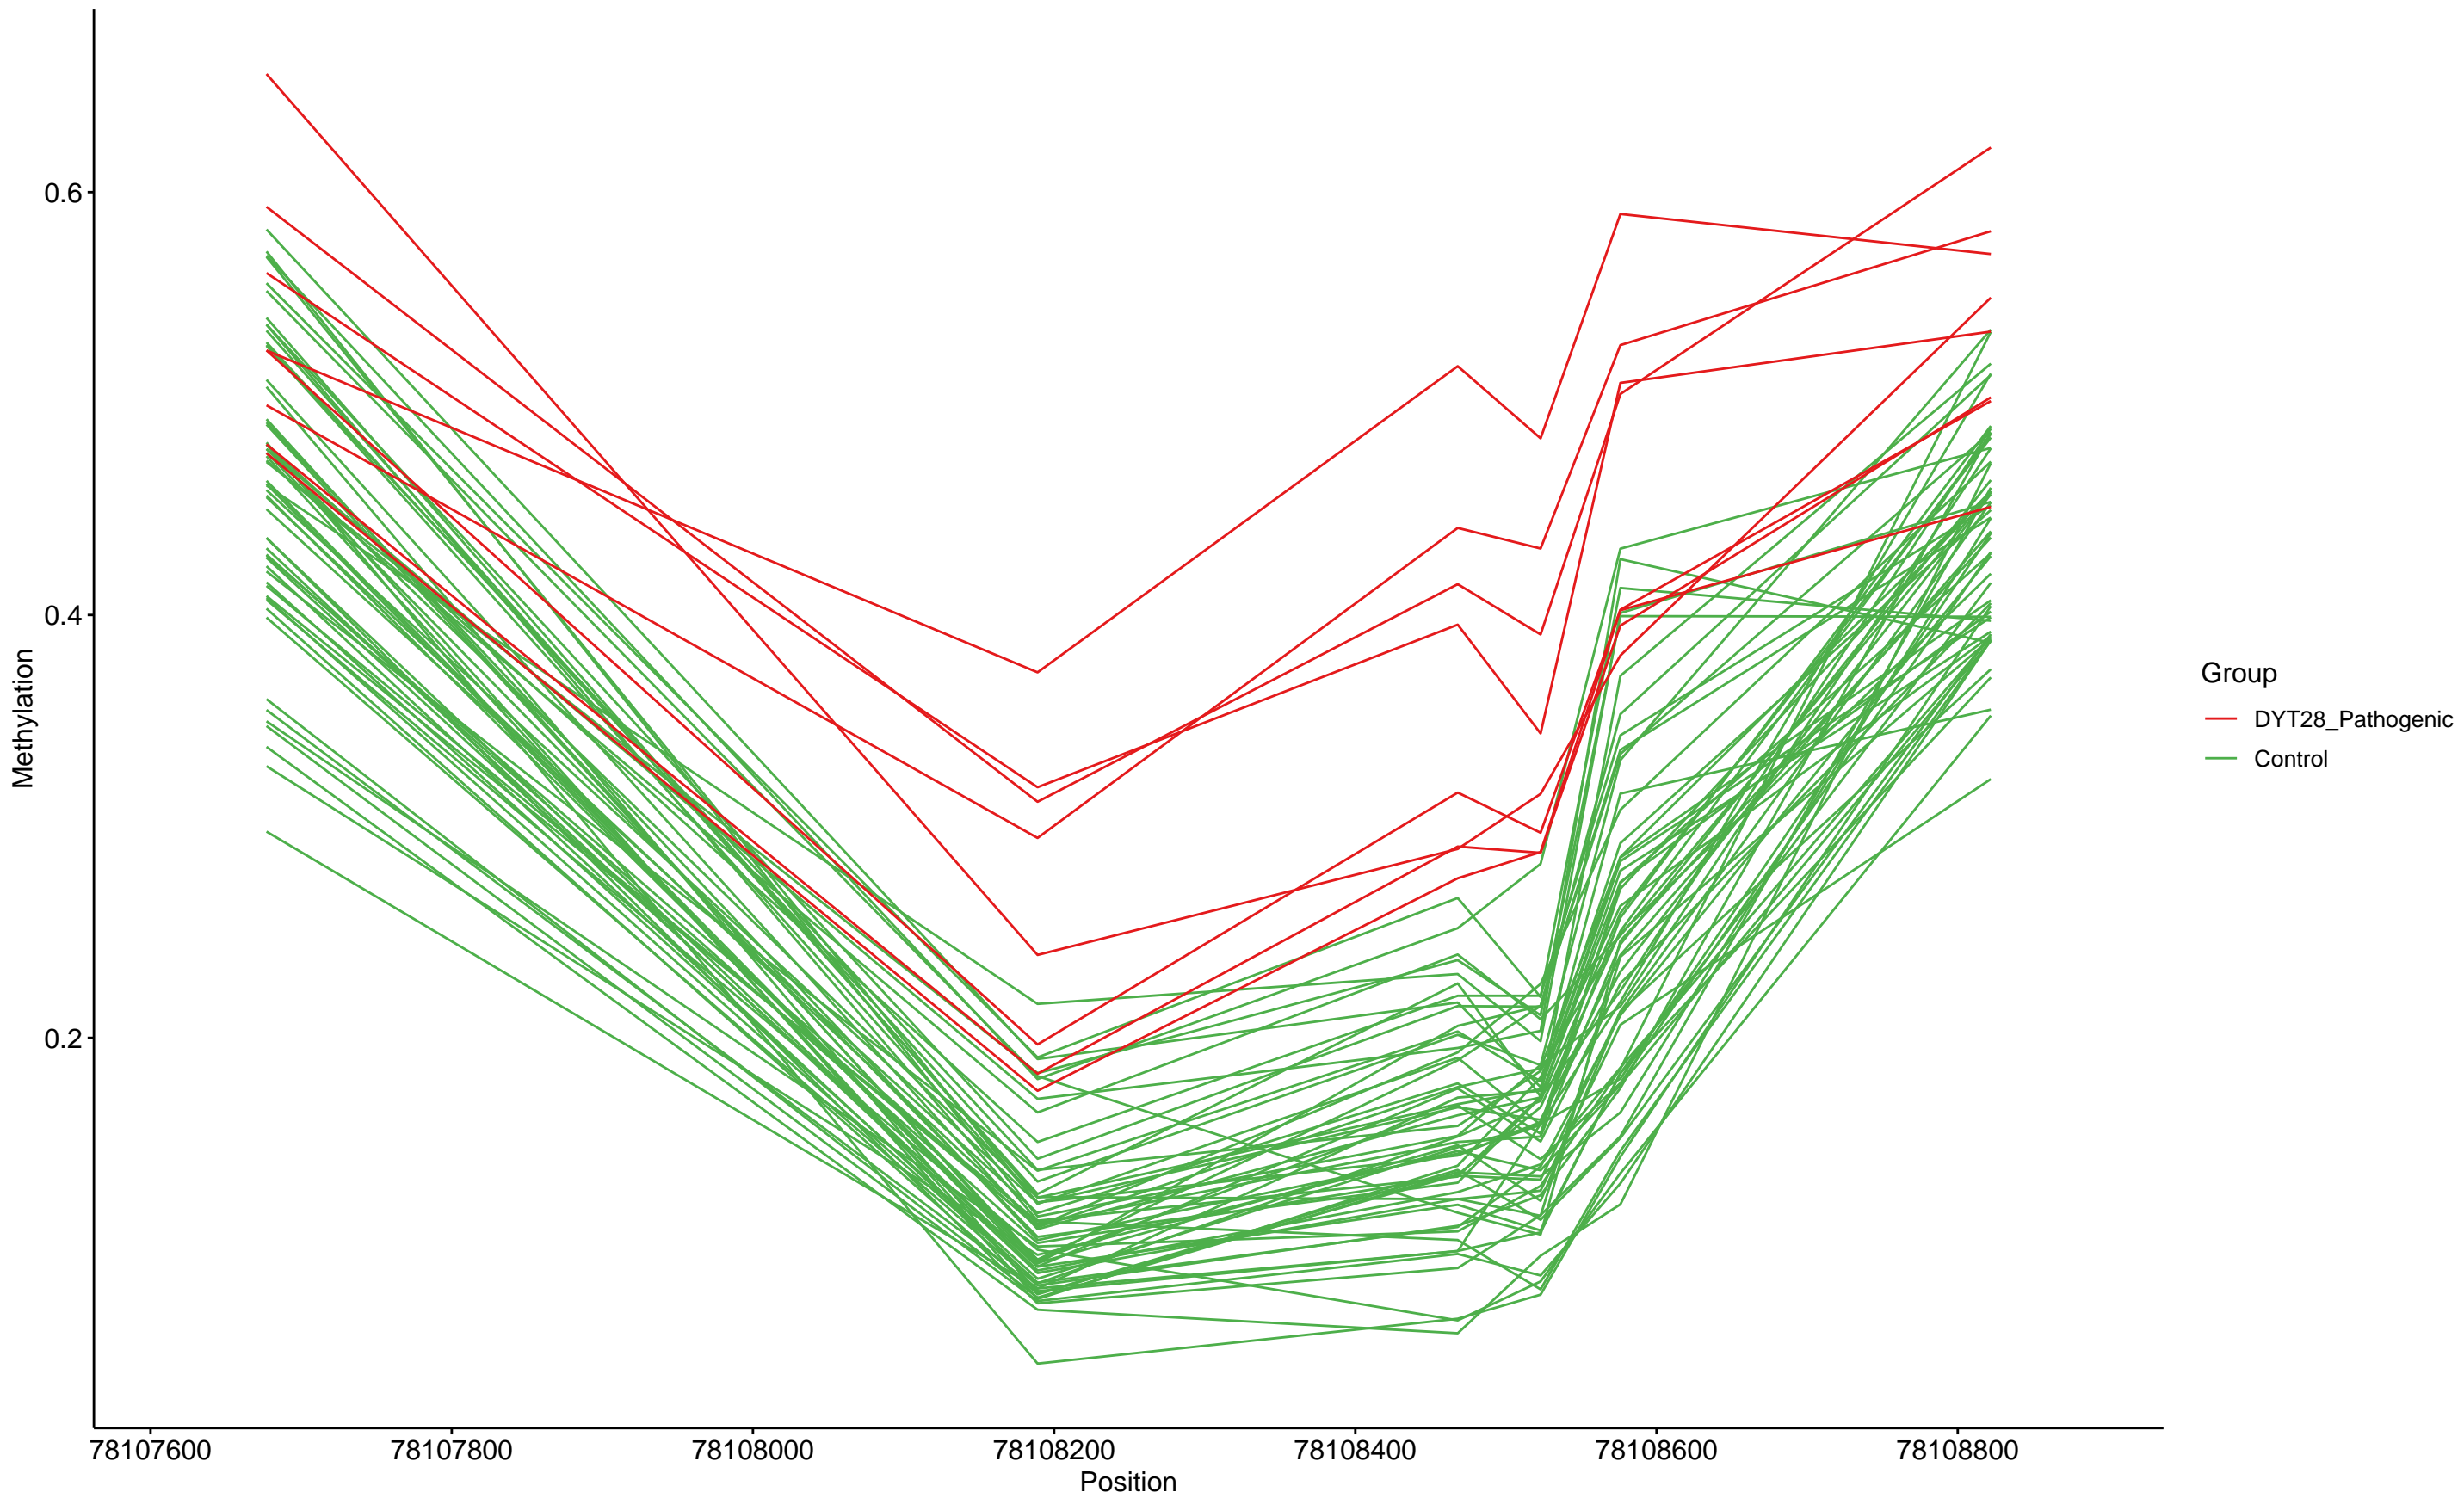

Region 86: chr2:43903227-43904011

Fisher: 4.65435077964824e-31

Stouffer: 2.79319617717631e-28

Mean difference: 0.154596327230116

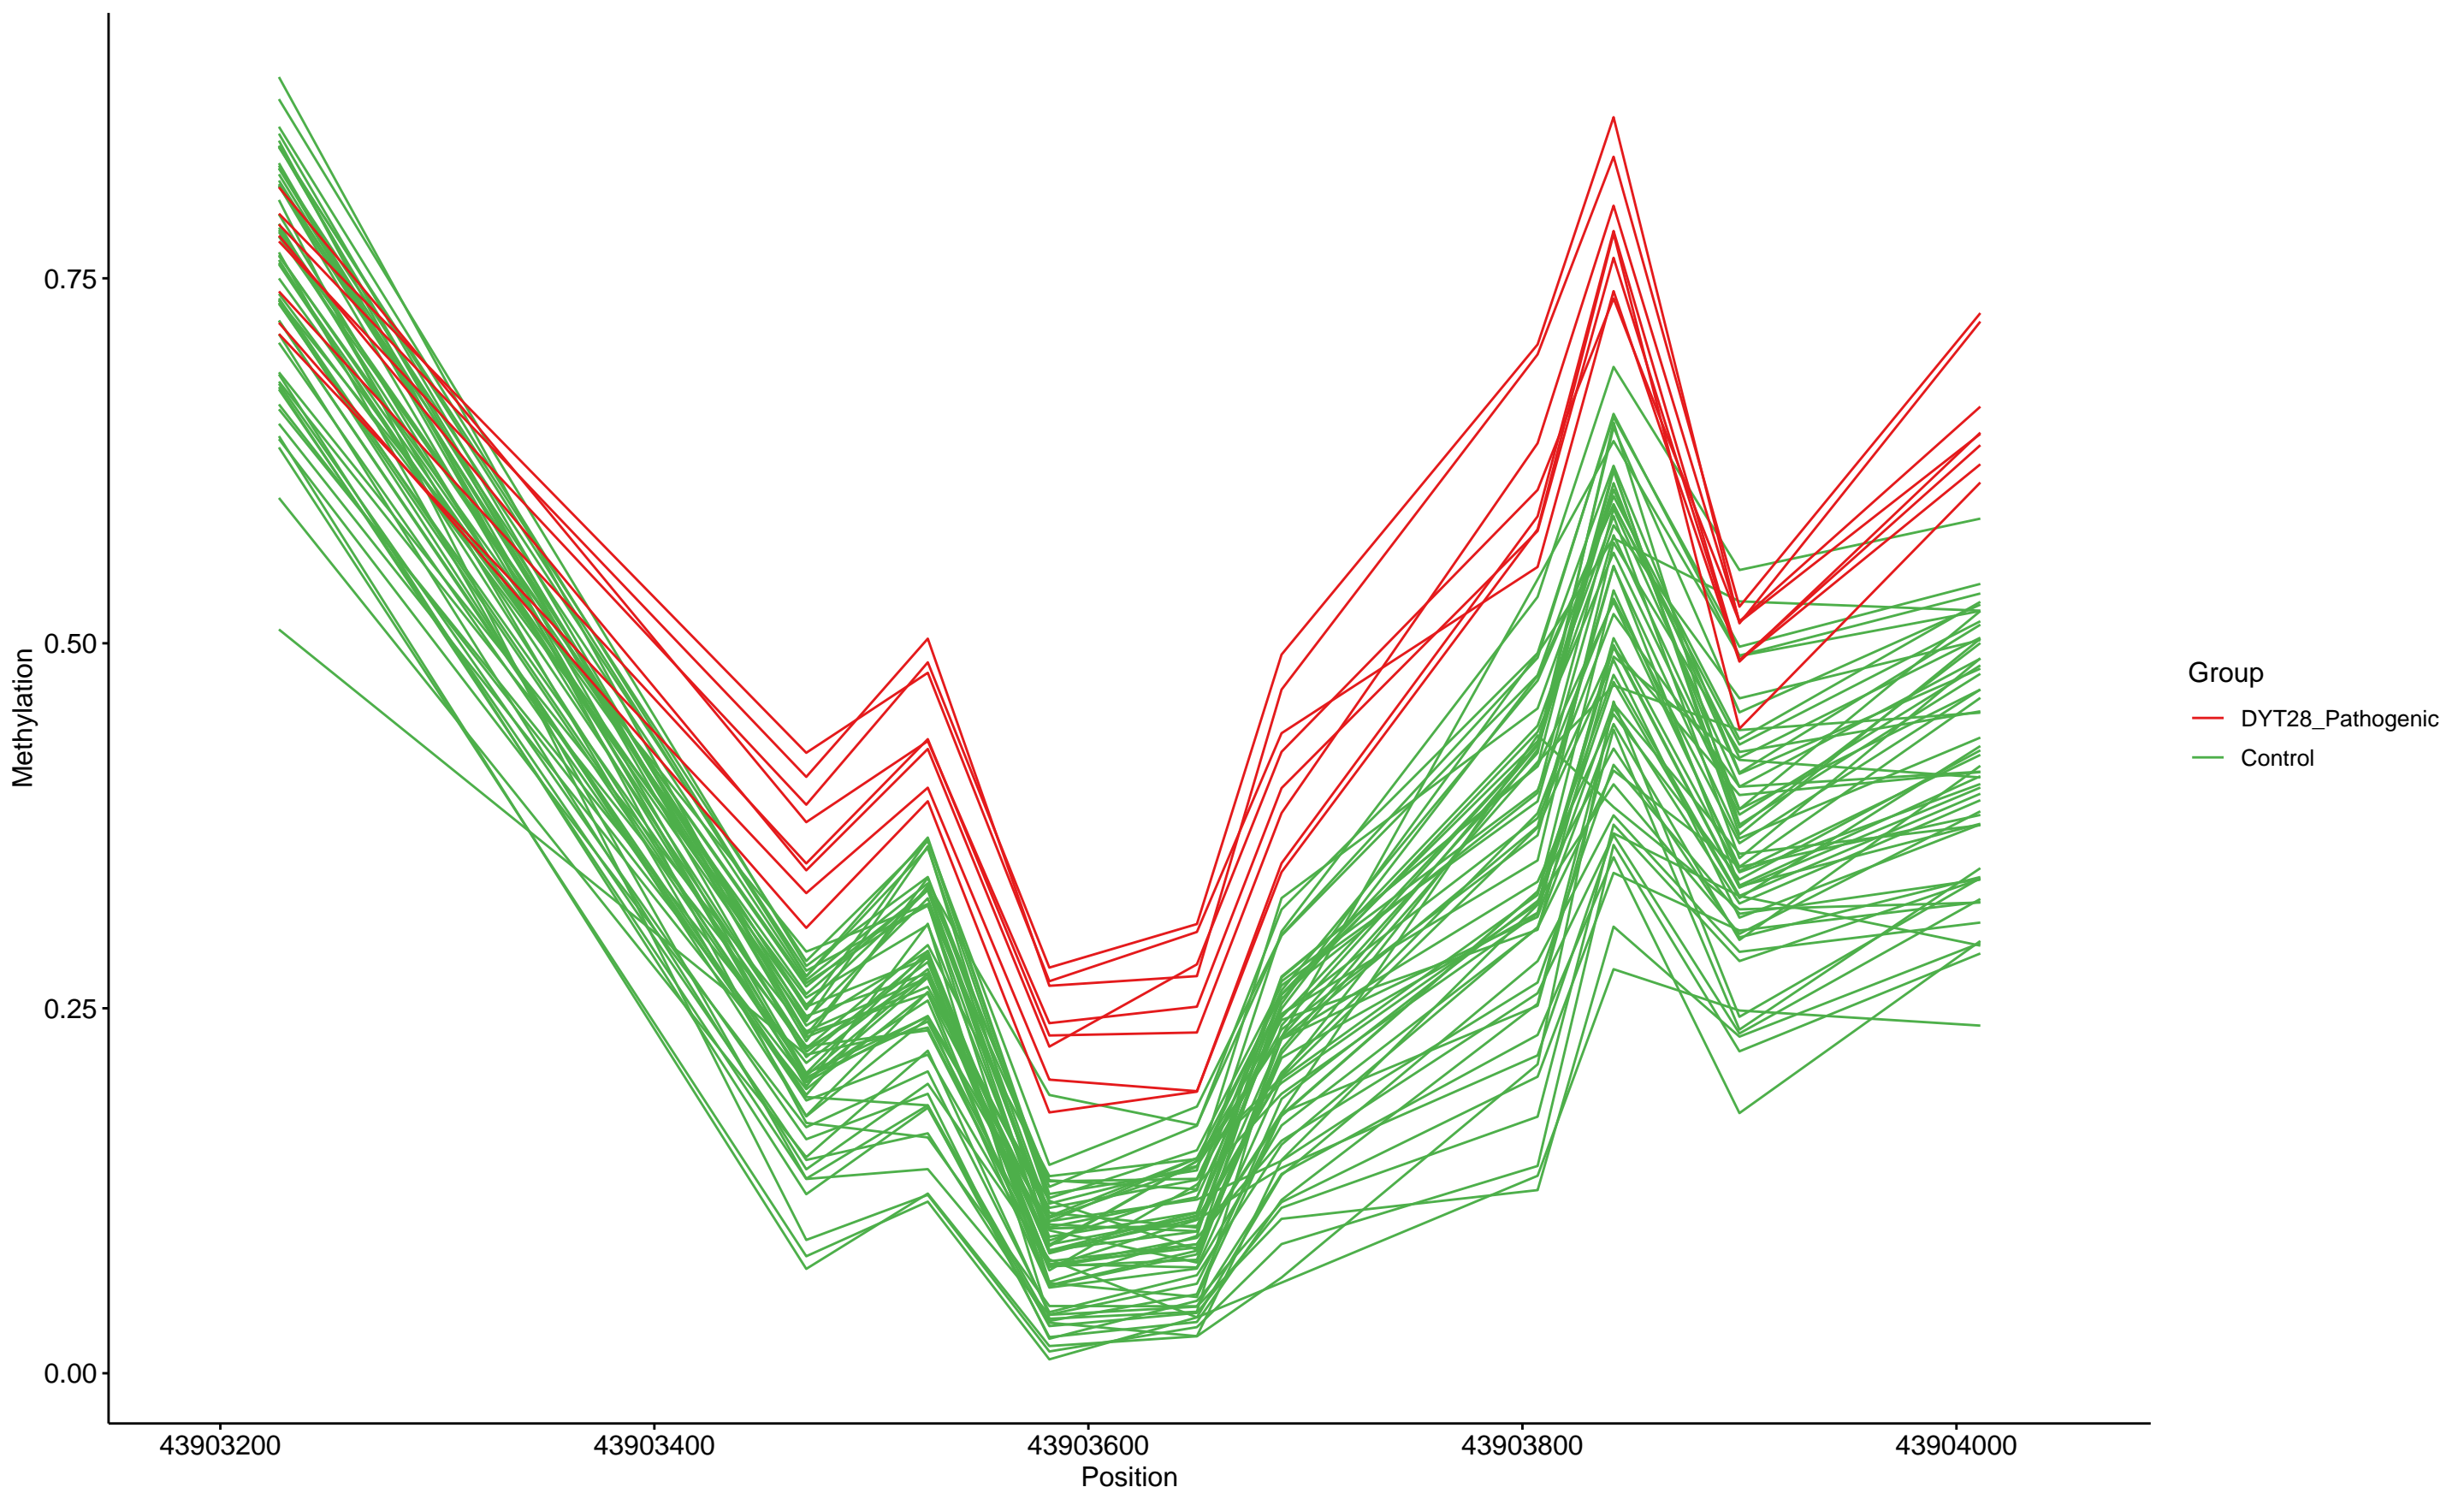

Region 87: chr12:2338399–2339614

Fisher: 4.66840342913166e-31

Stouffer: 1.1033148419419e-25

Mean difference: 0.103544966935119

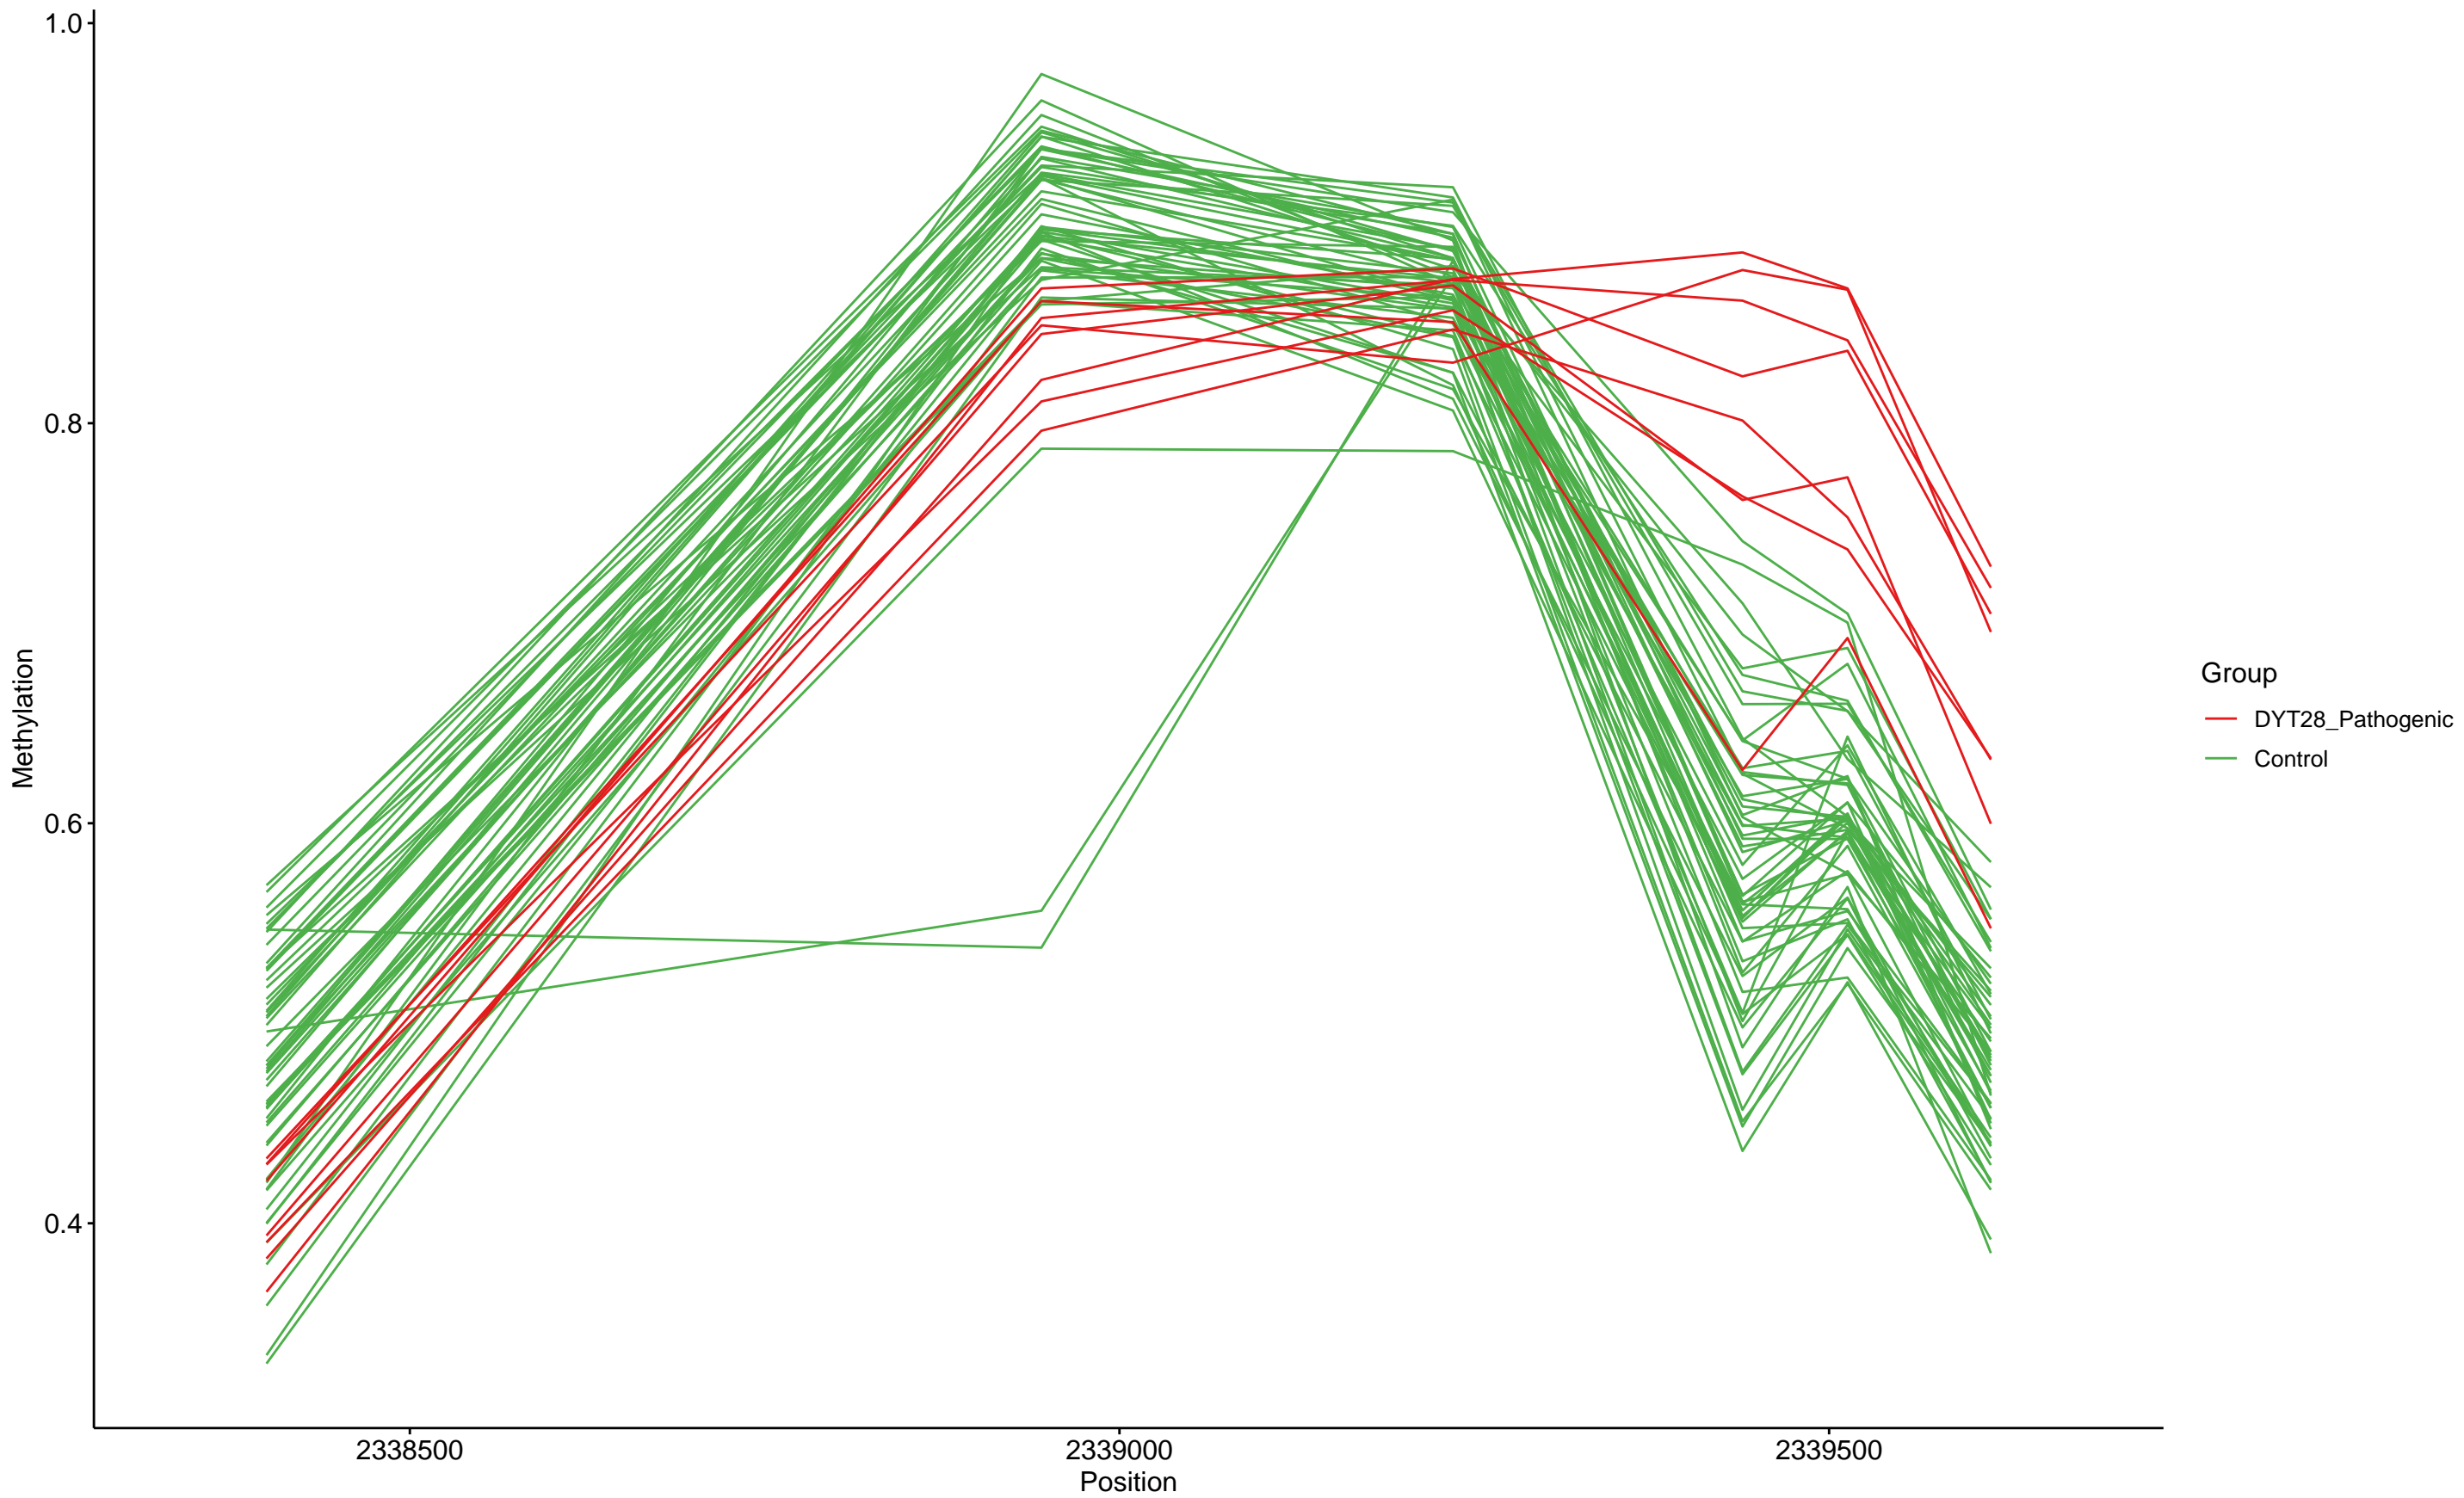



Region 88: chr15:89924731-89925694

Fisher:  $9.15420719786243e-31$

Stouffer:  $6.01200387499142e-31$

Mean difference:  $-0.129351124362403$

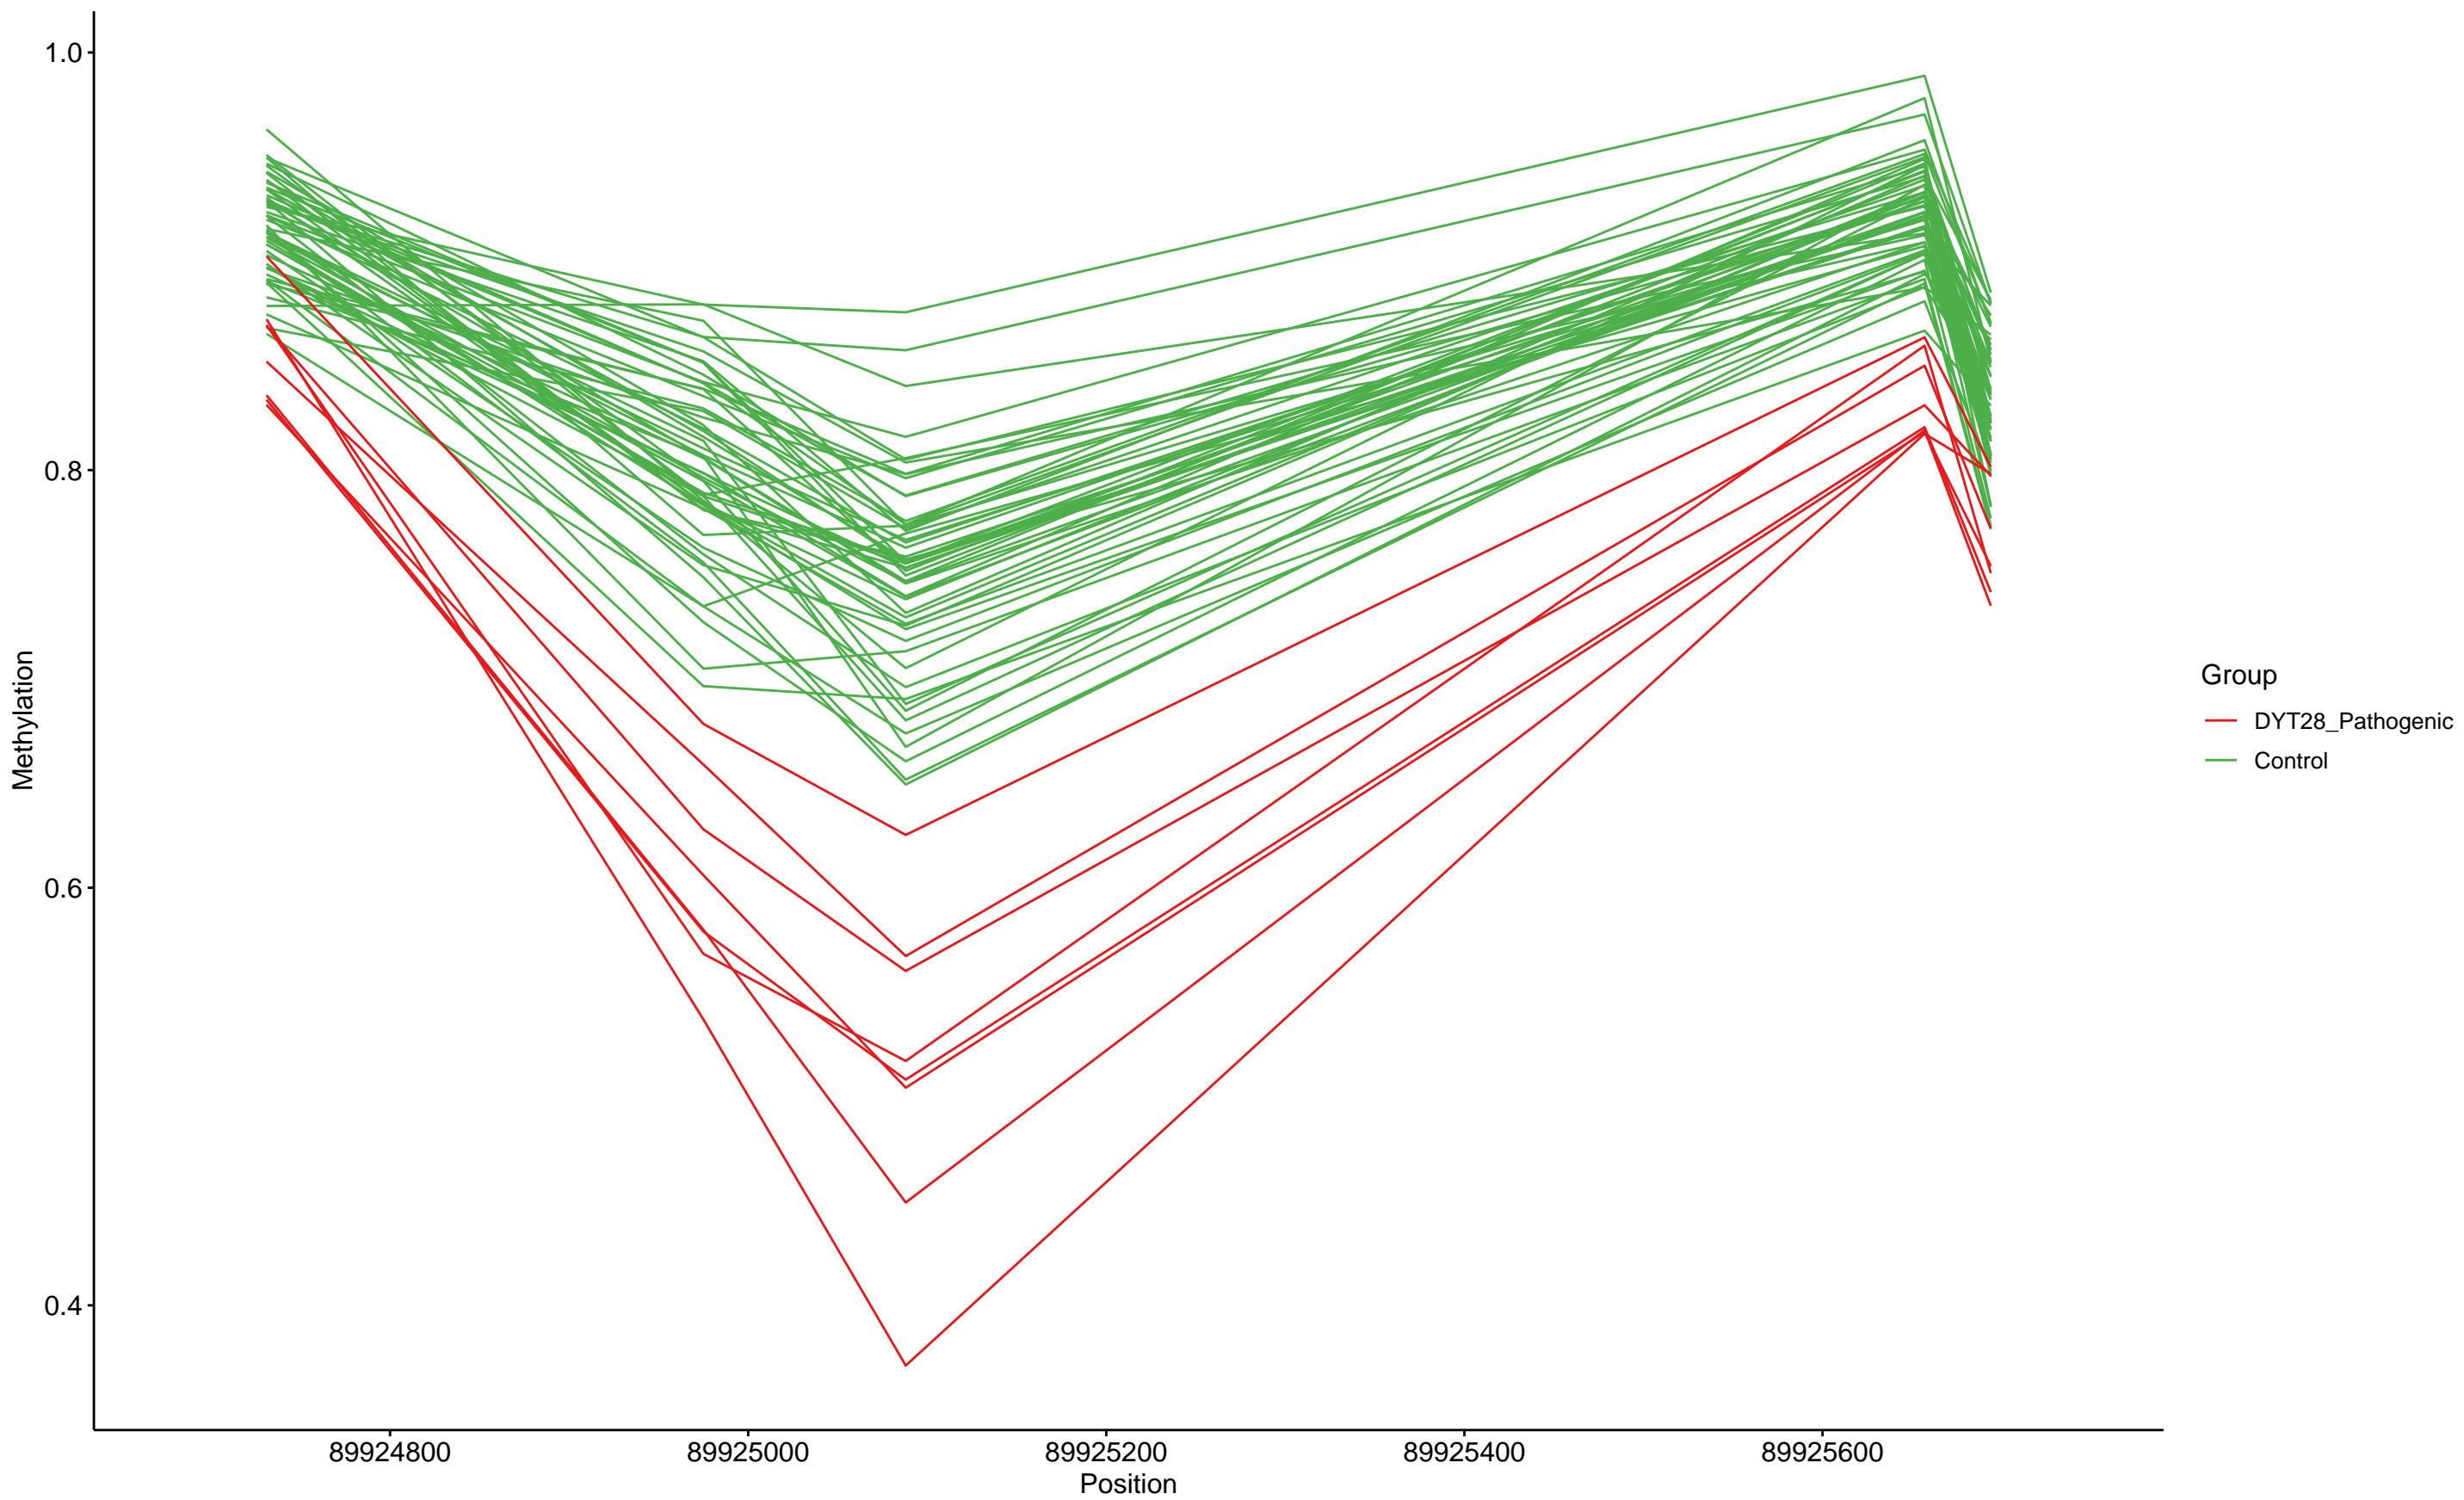



Region 89: chr11:20625538–20627781

Fisher: 1.44030275467913e-30

Stouffer: 6.05355946981892e-33

Mean difference: 0.104516694444129

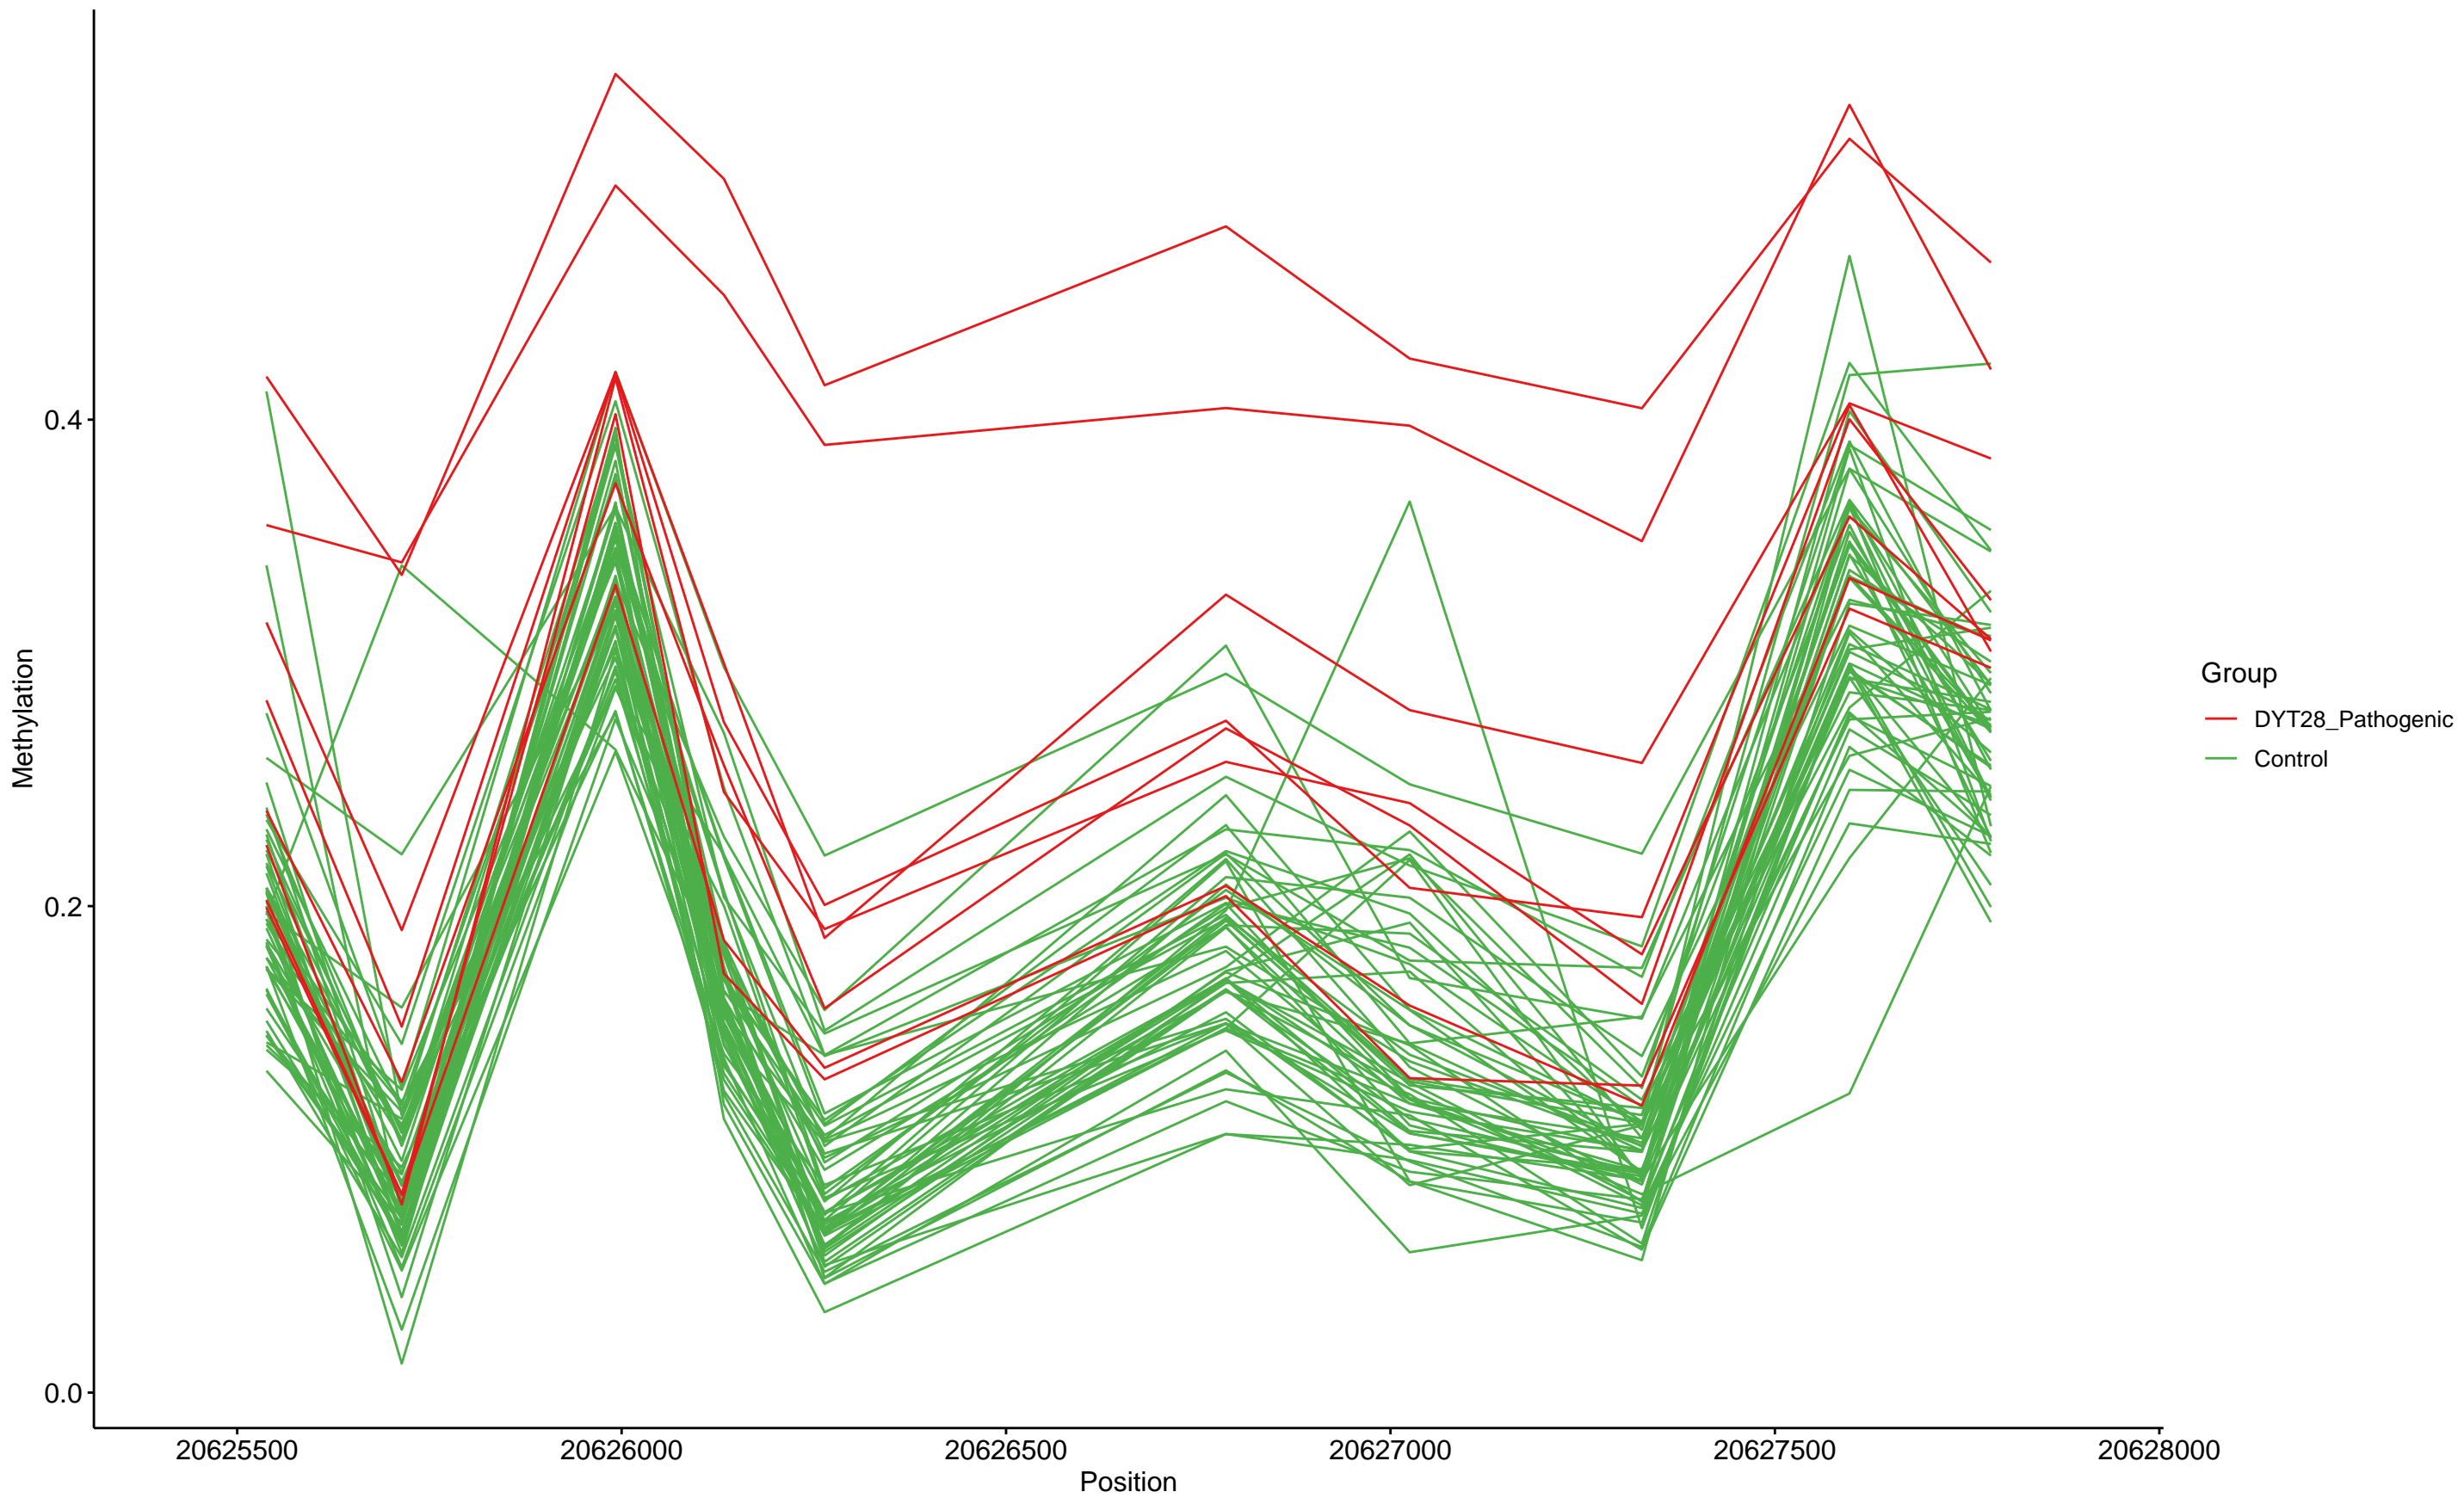

Region 90: chr12:102036140–102036563

Fisher: 1.78584100796232e-30

Stouffer: 1.13059144058671e-31

Mean difference: 0.125026053032545

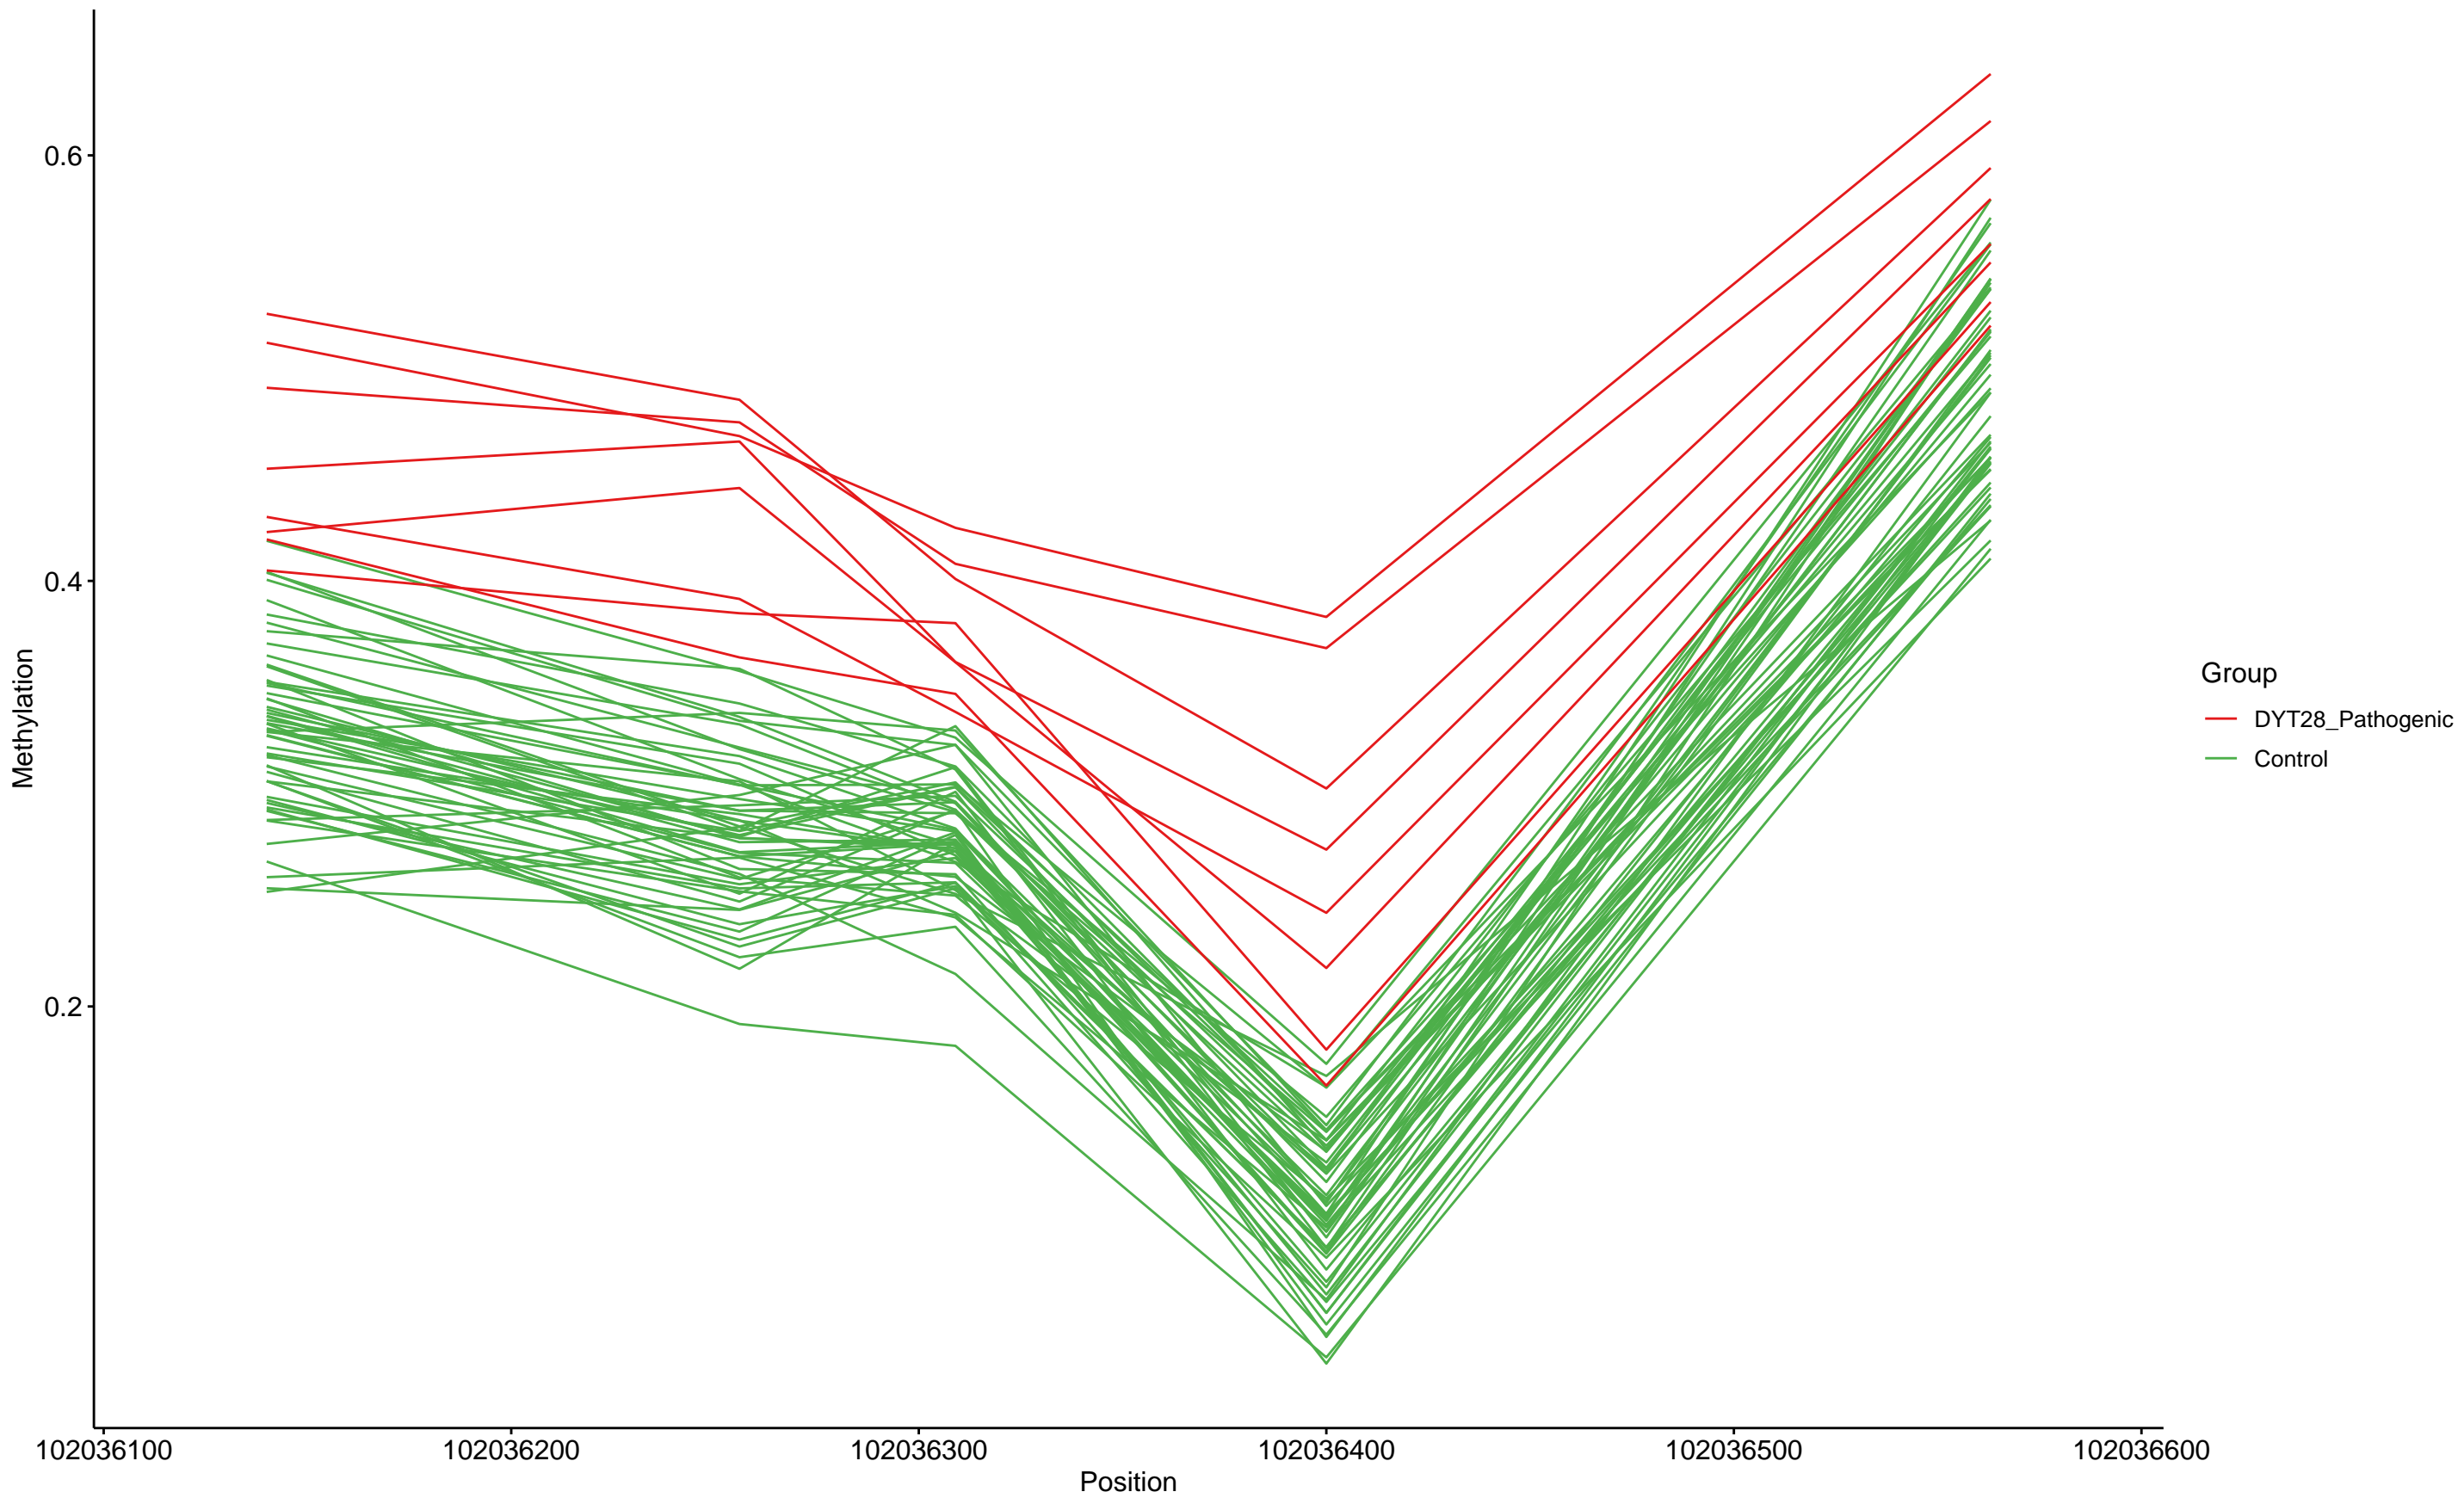

Region 91: chr10:97849481-97850399

Fisher: 2.02389544253852e-30

Stouffer: 1.99731304726543e-27

Mean difference: 0.11884498509179

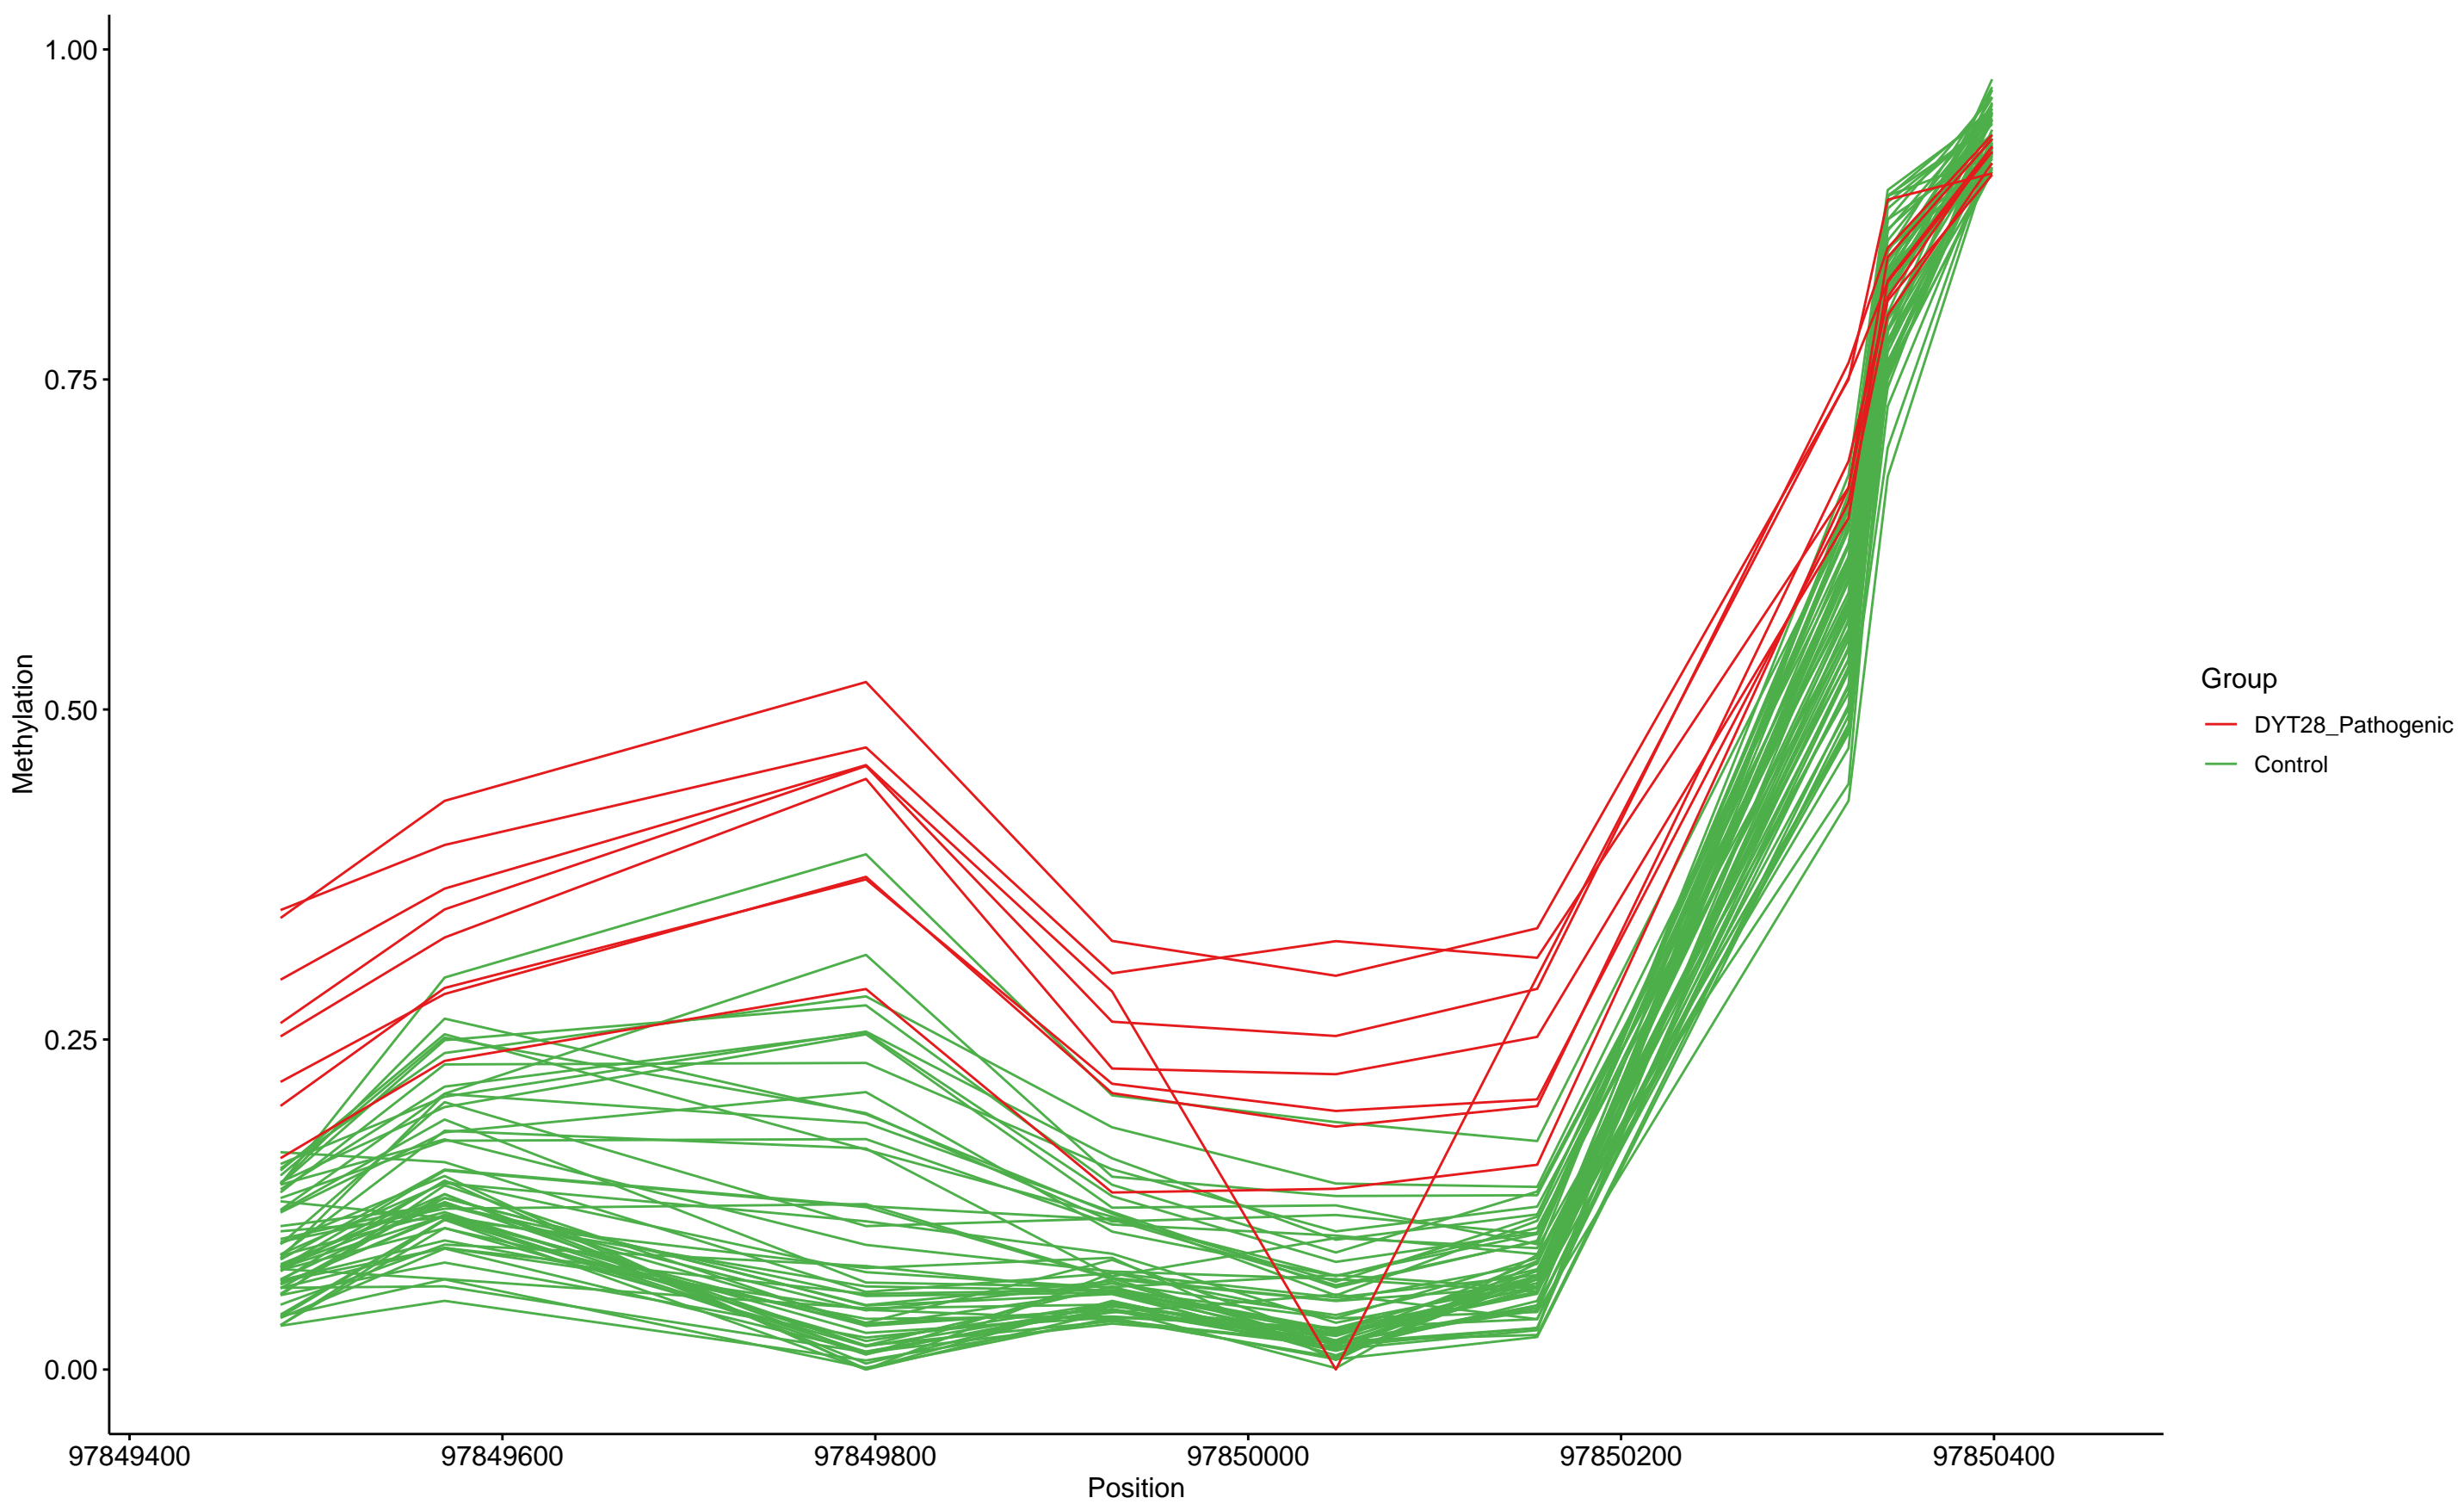



Region 92: chr10:86300295–86300952

Fisher: 5.80685940450345e-30

Stouffer: 2.80934274460871e-31

Mean difference: 0.11164194377619

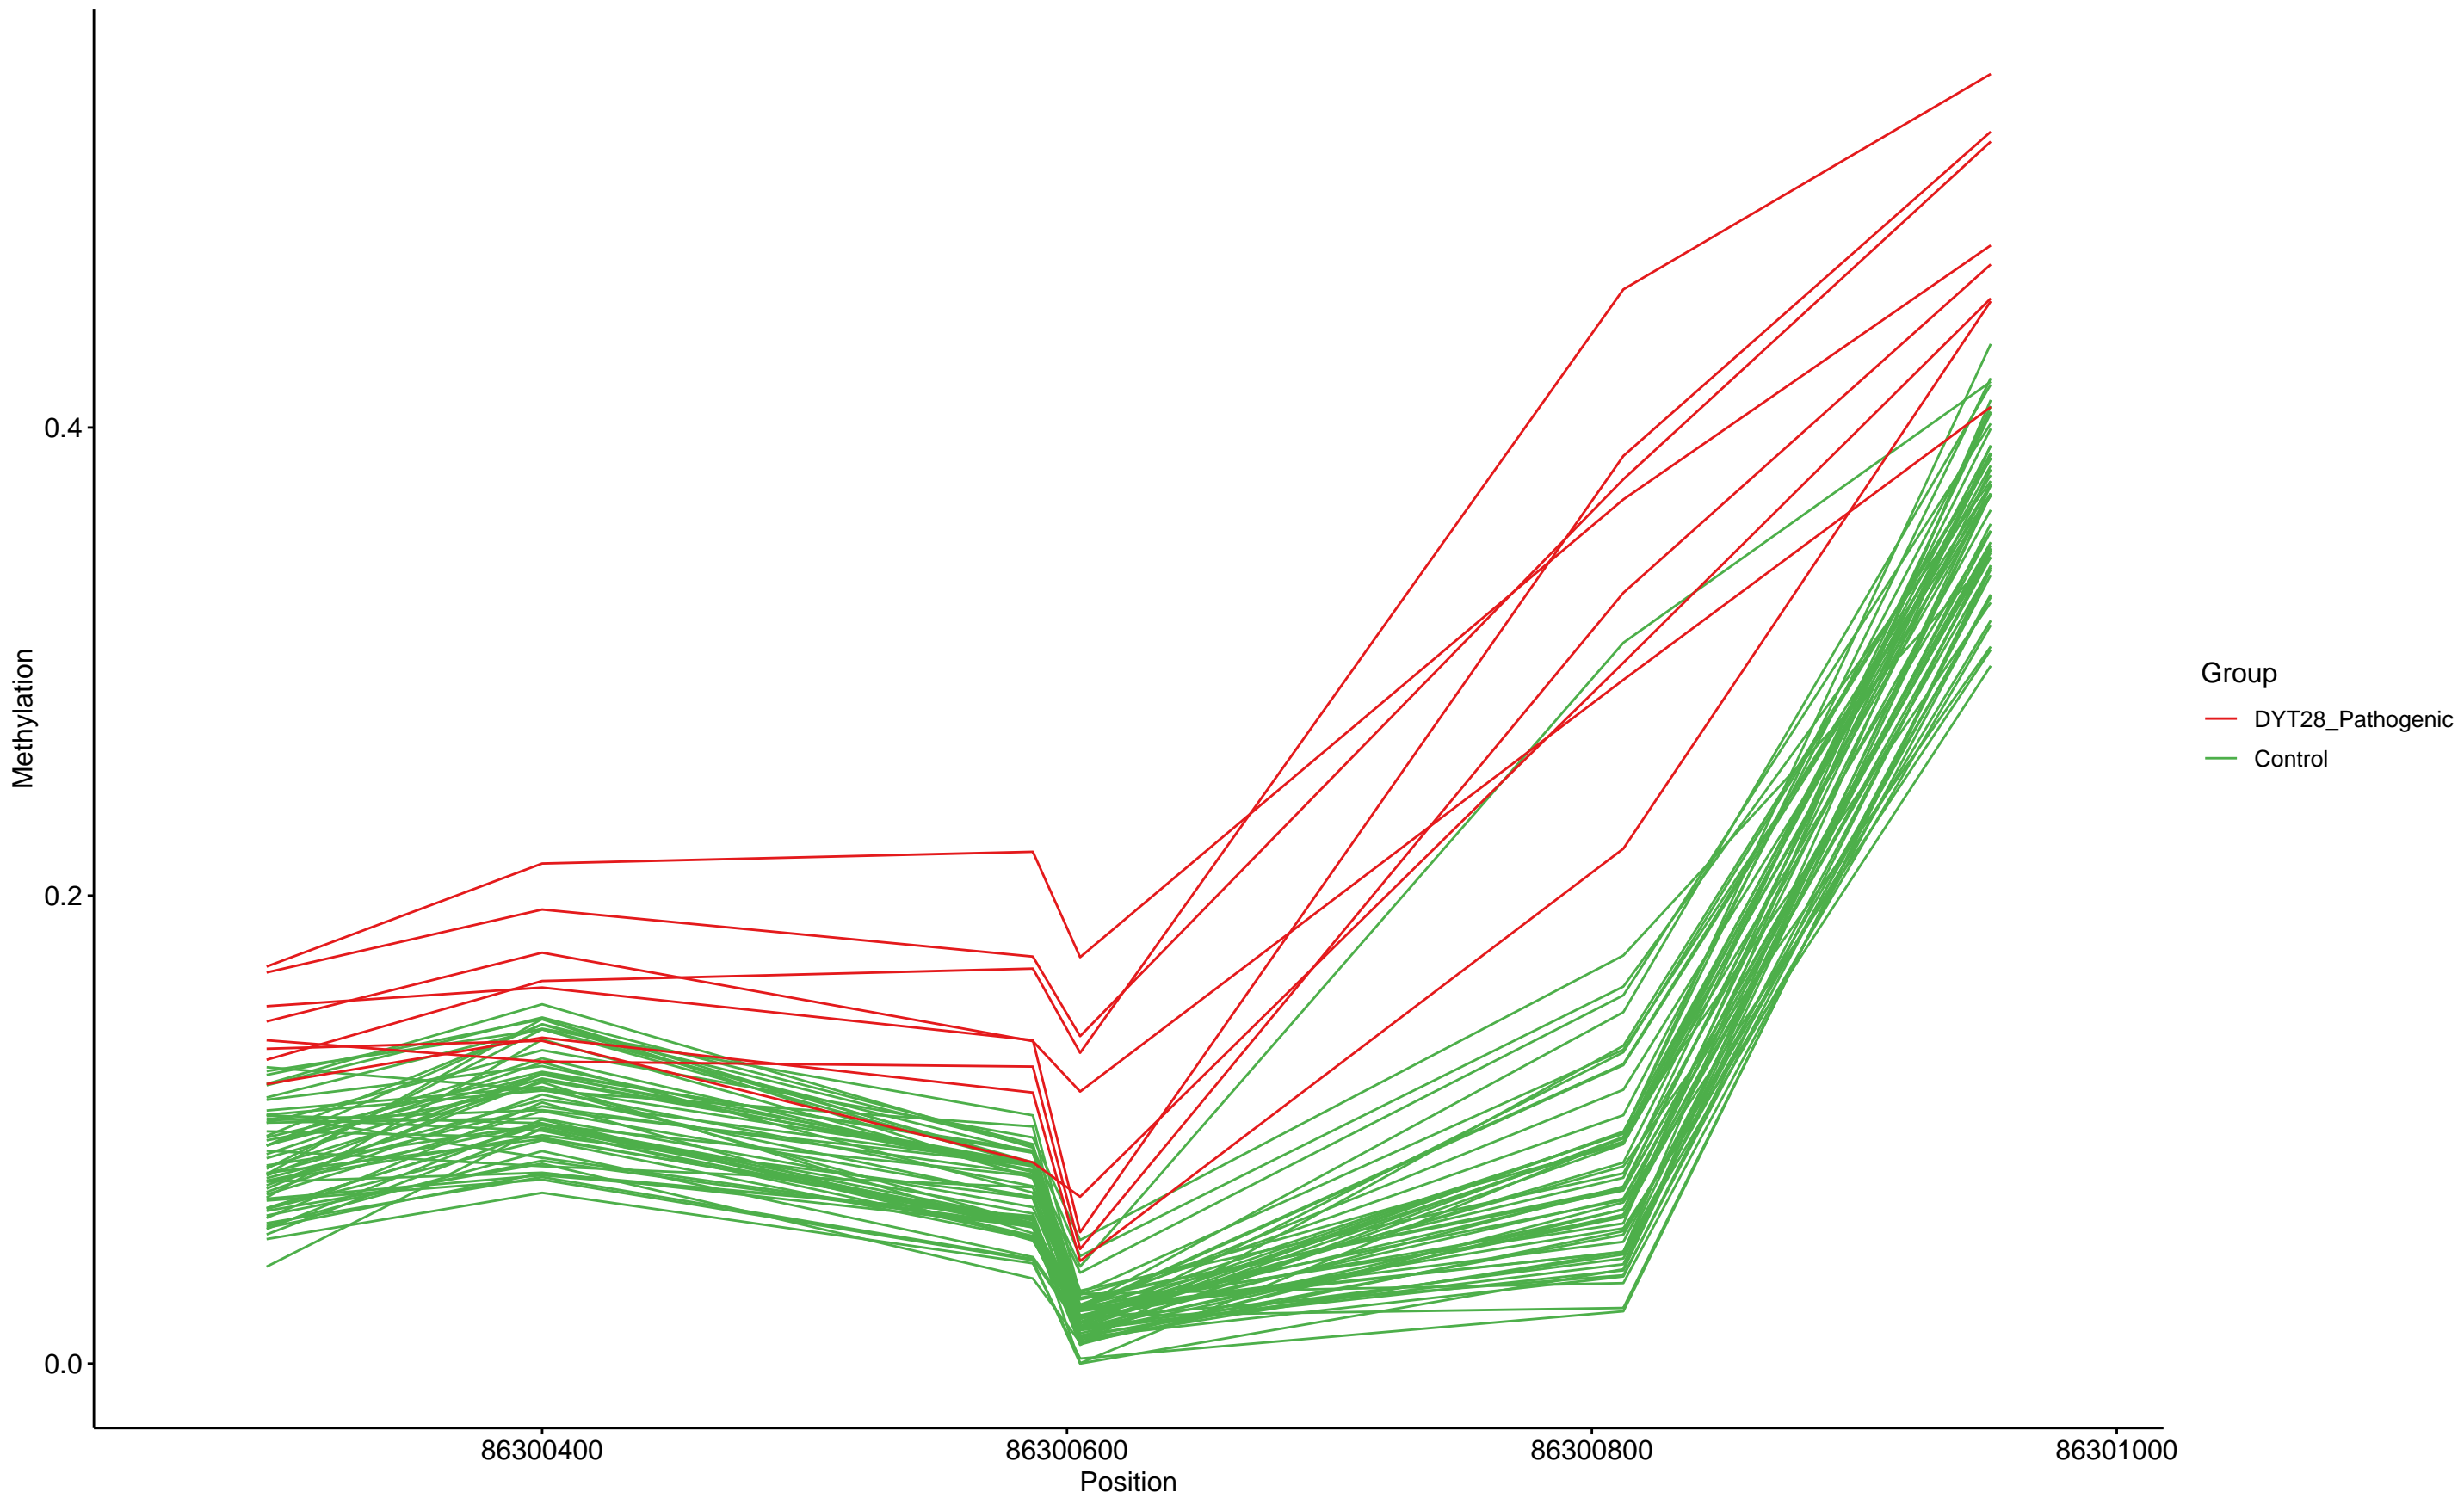



Region 93: chr2:164204628–164205820

Fisher: 3.18472608142678e-29

Stouffer: 4.9424858722641e-25

Mean difference: 0.102962978259782

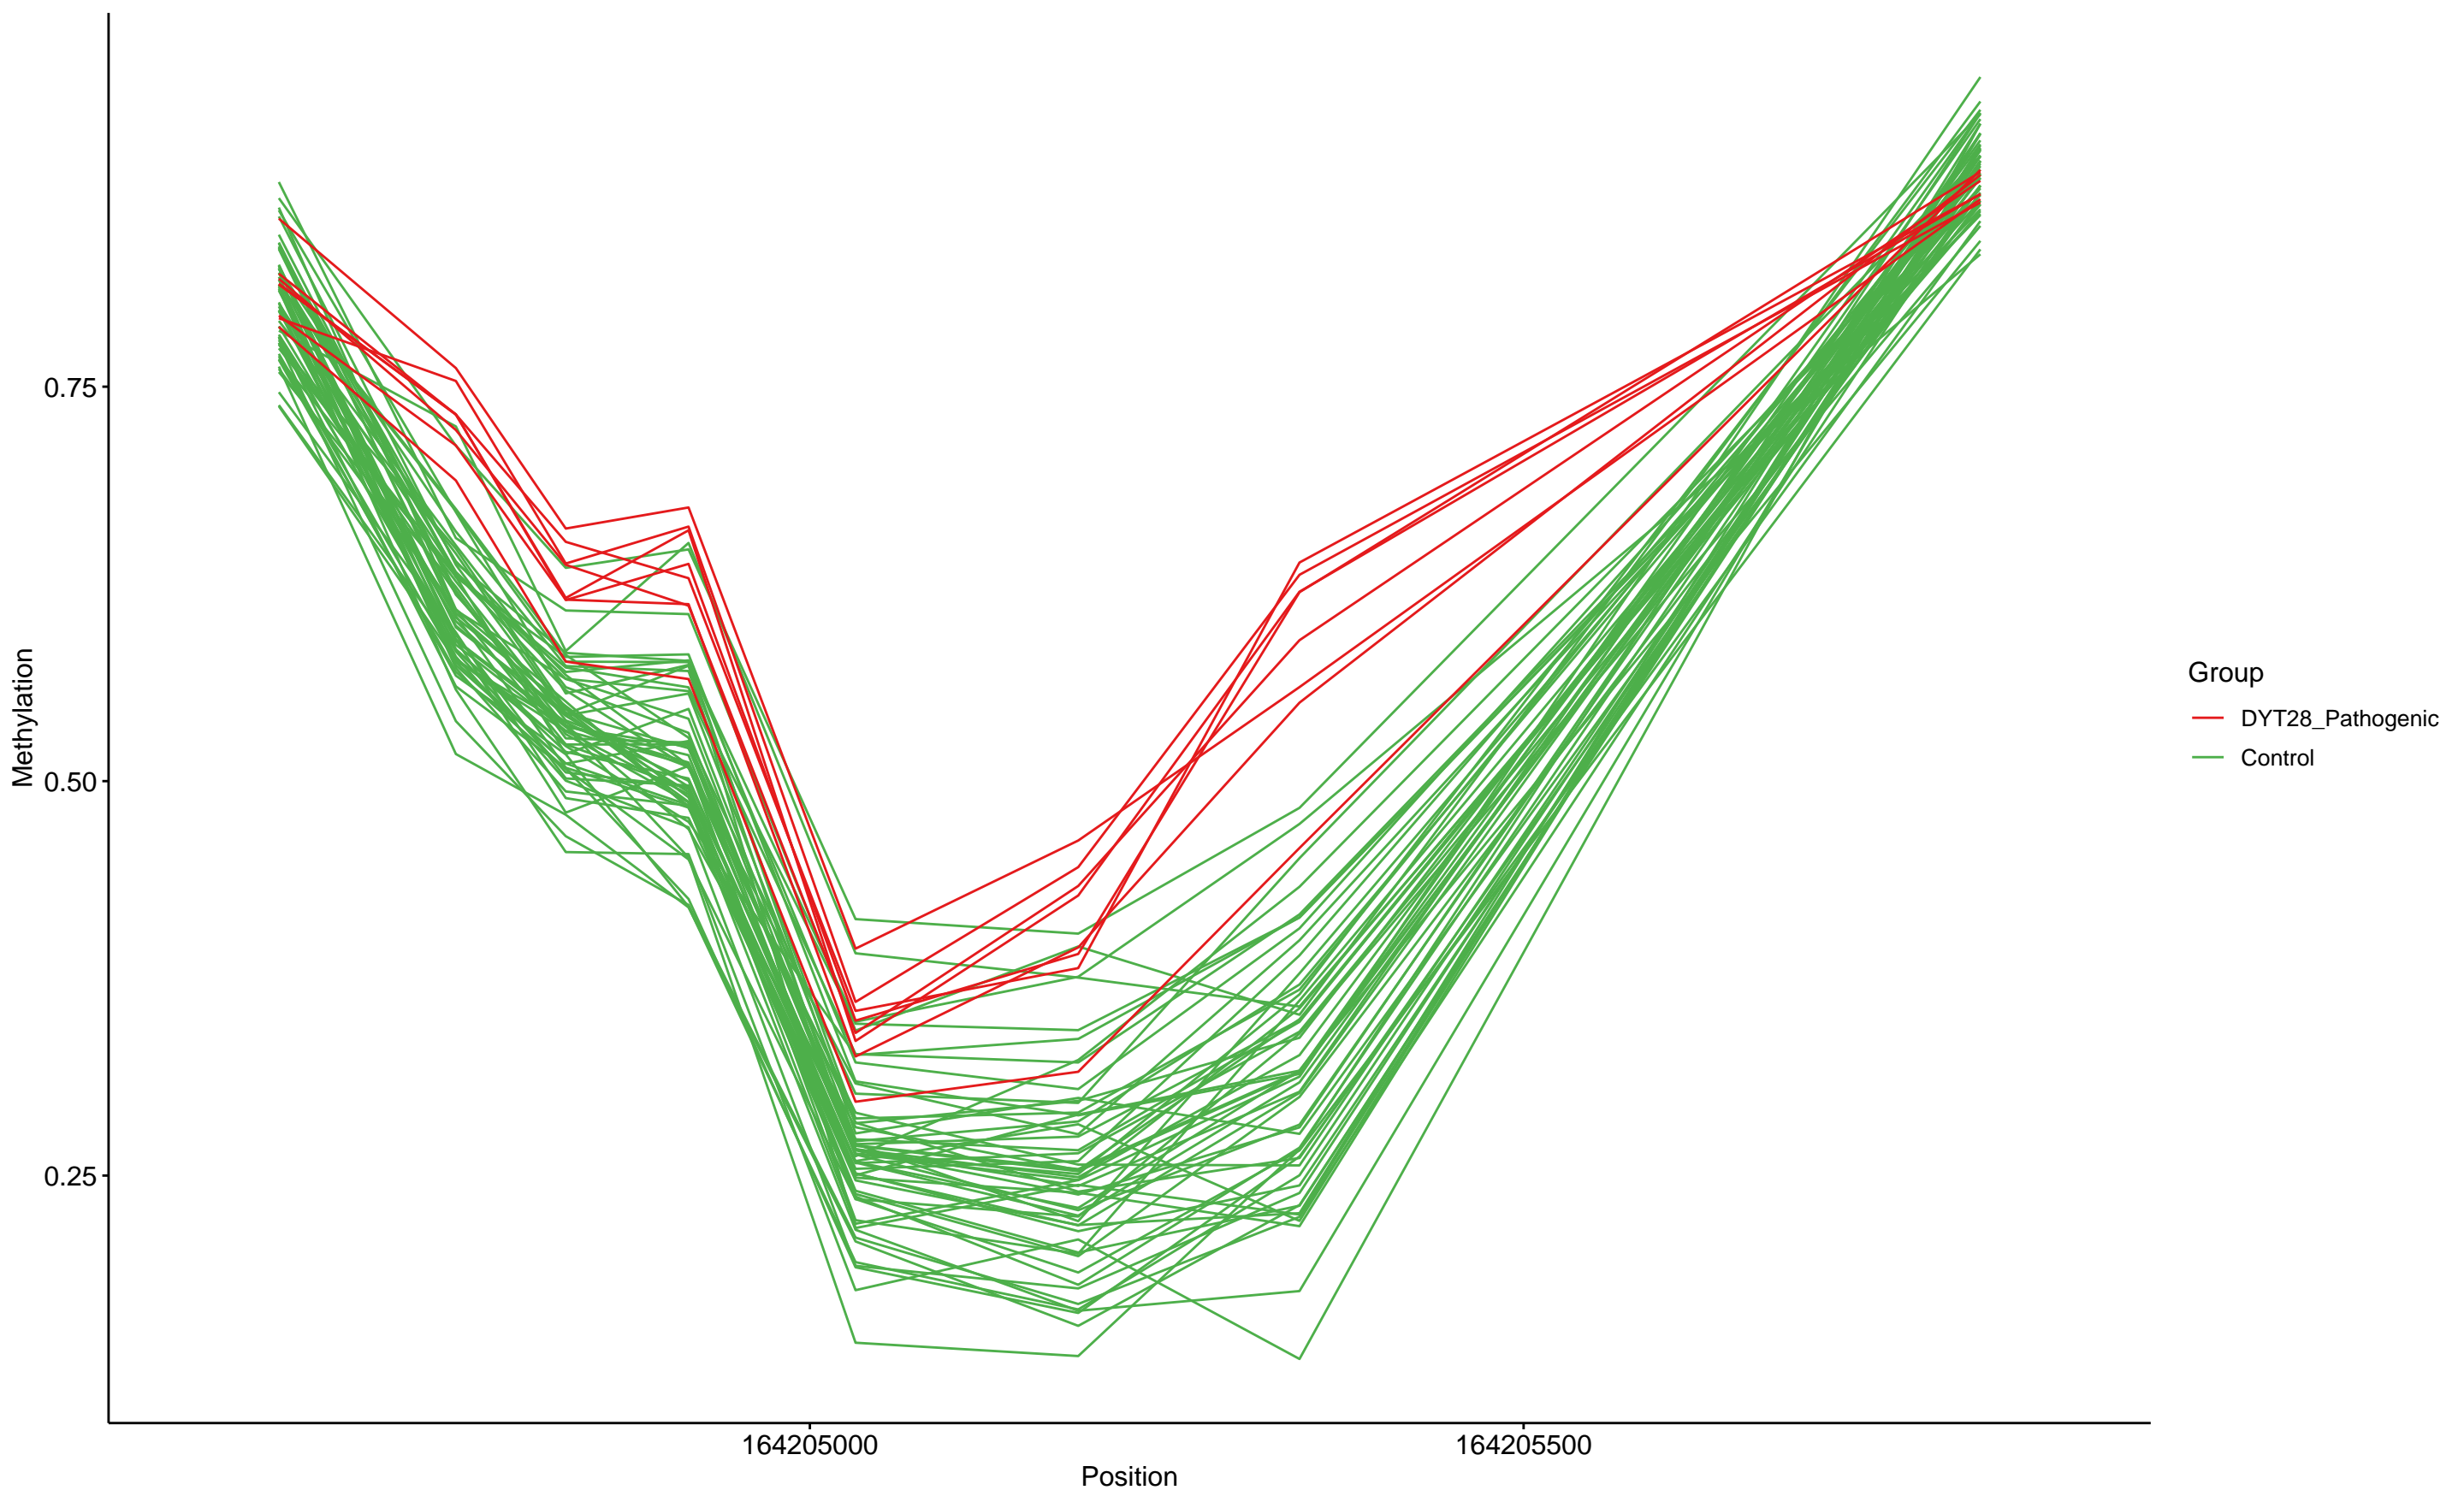

Region 94: chr1:147799707-147801437

Fisher: 5.25803813695172e-29

Stouffer: 4.0684924420818e-24

Mean difference: 0.112964161388059

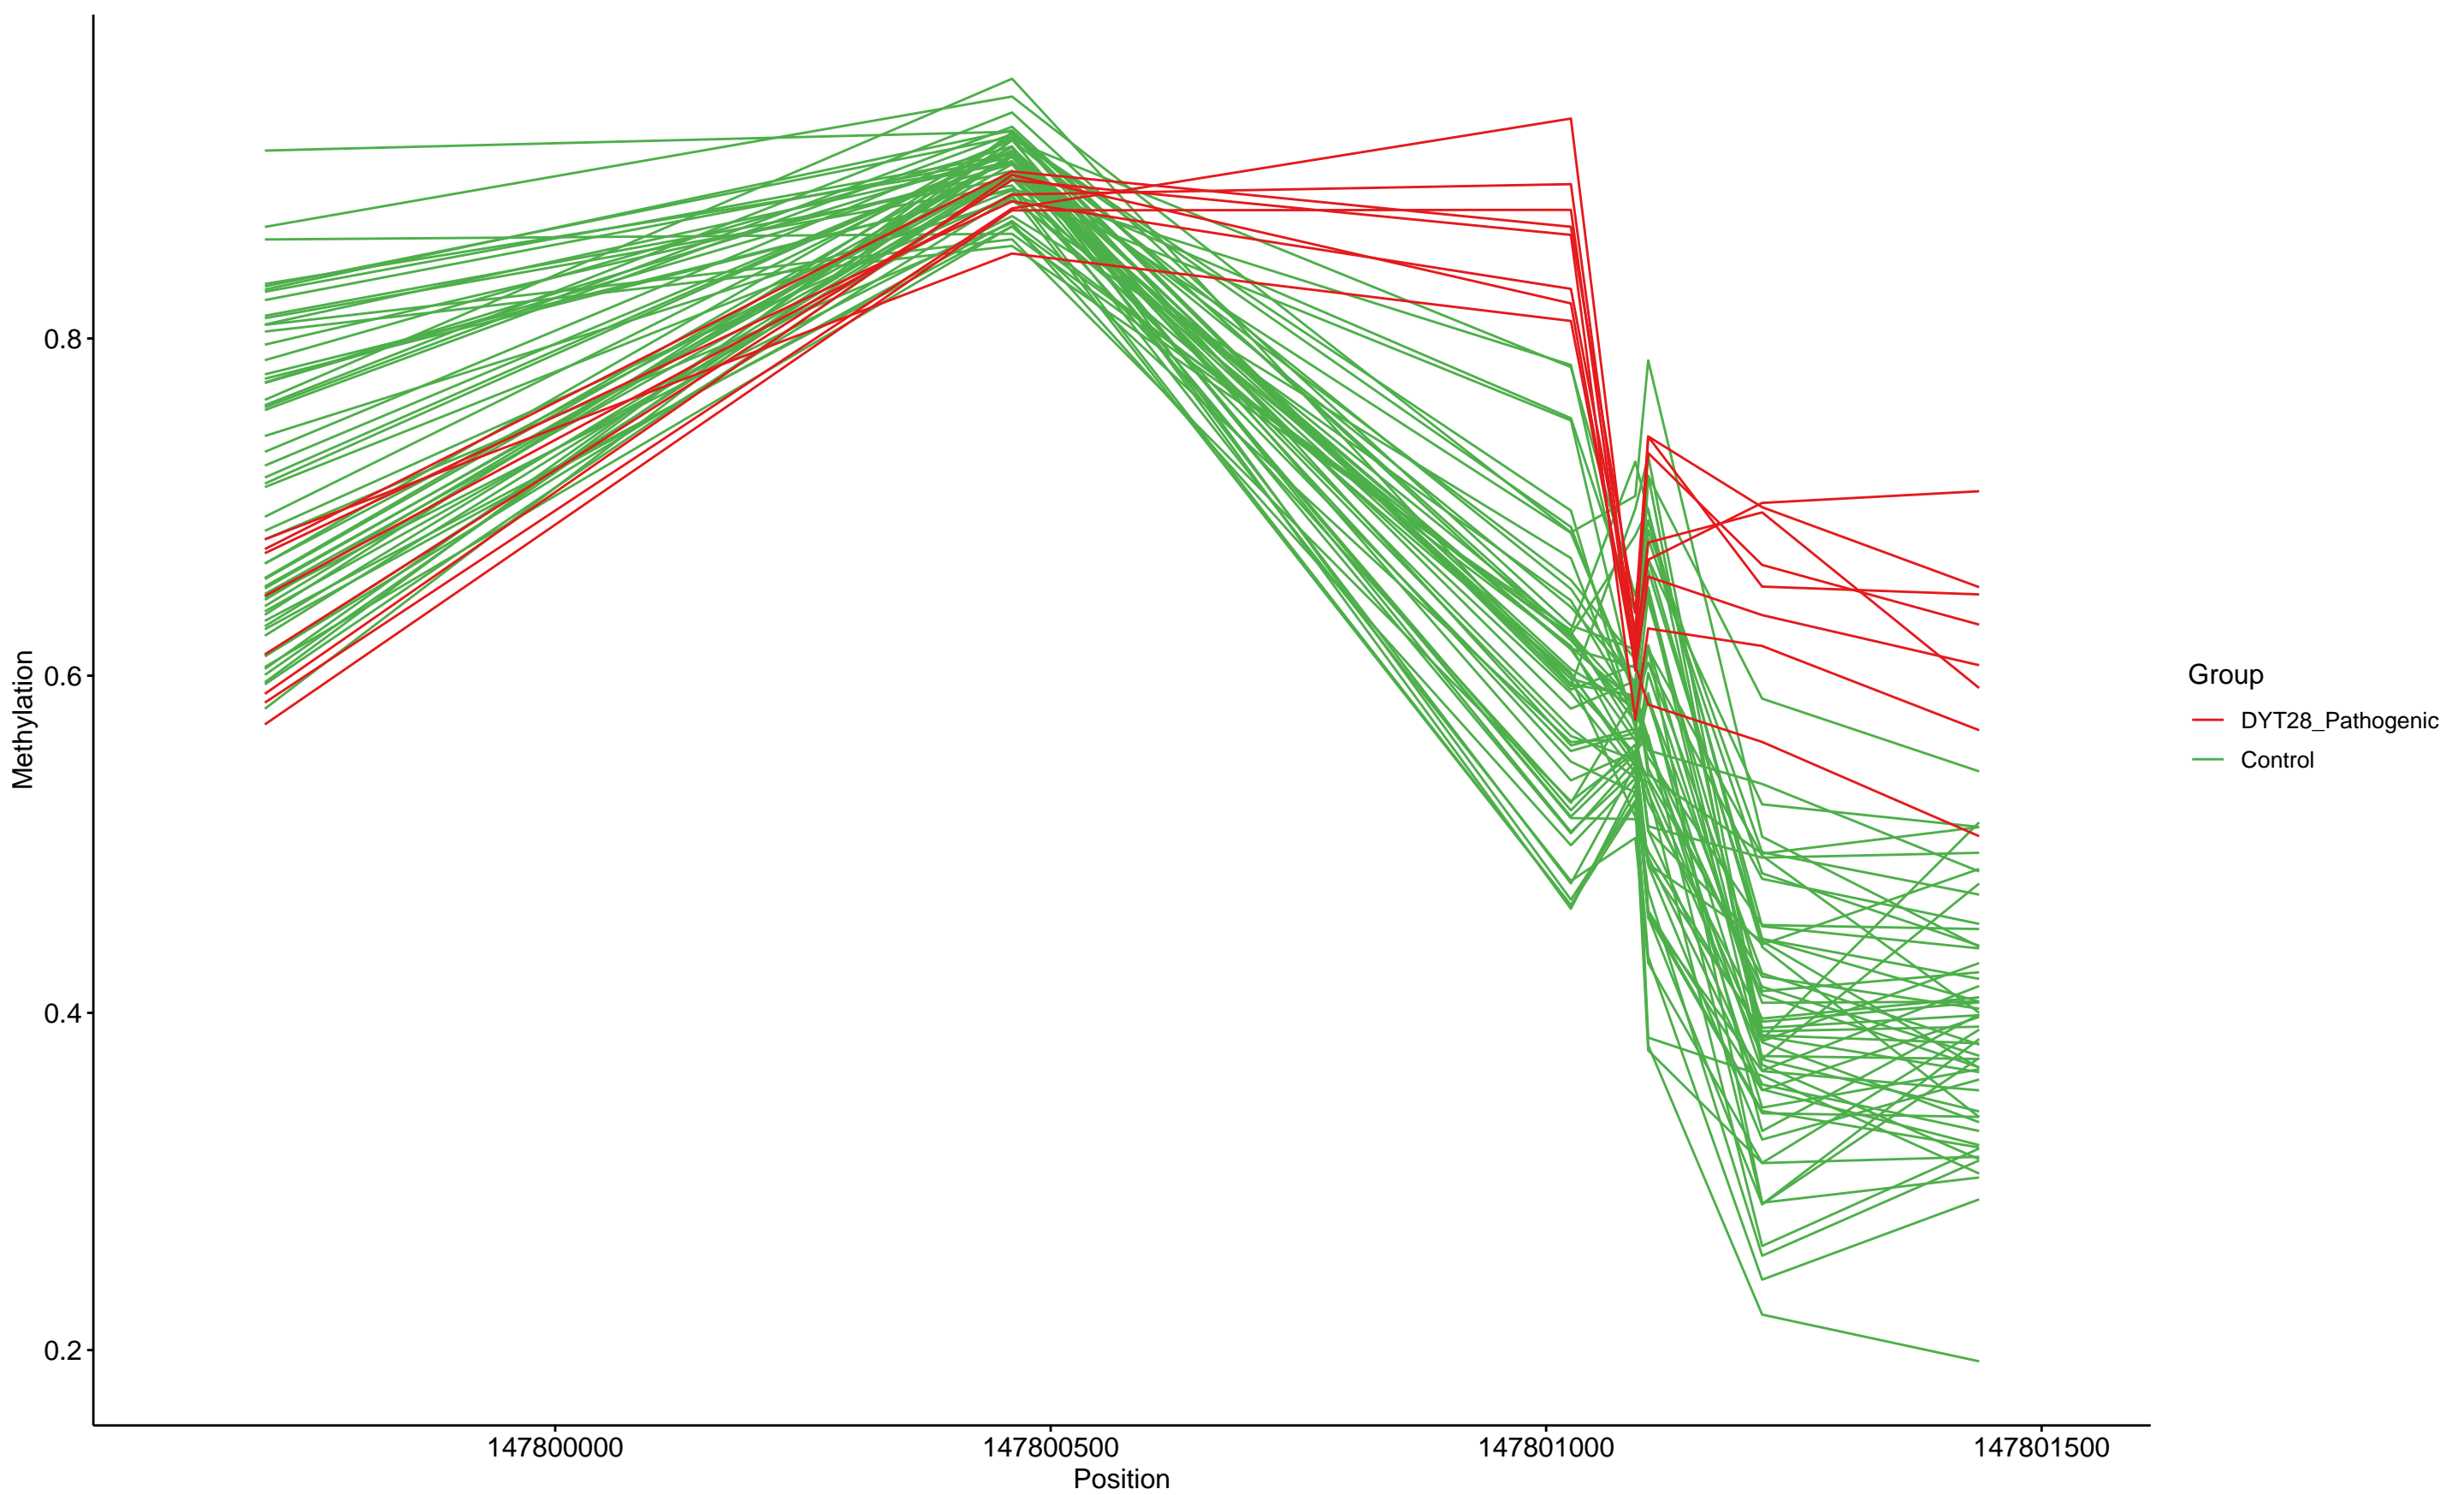

Region 95: chr1:106622574–106623781

Fisher: 7.12340215086538e-29

Stouffer: 6.63619163167583e-29

Mean difference: 0.132008285013592

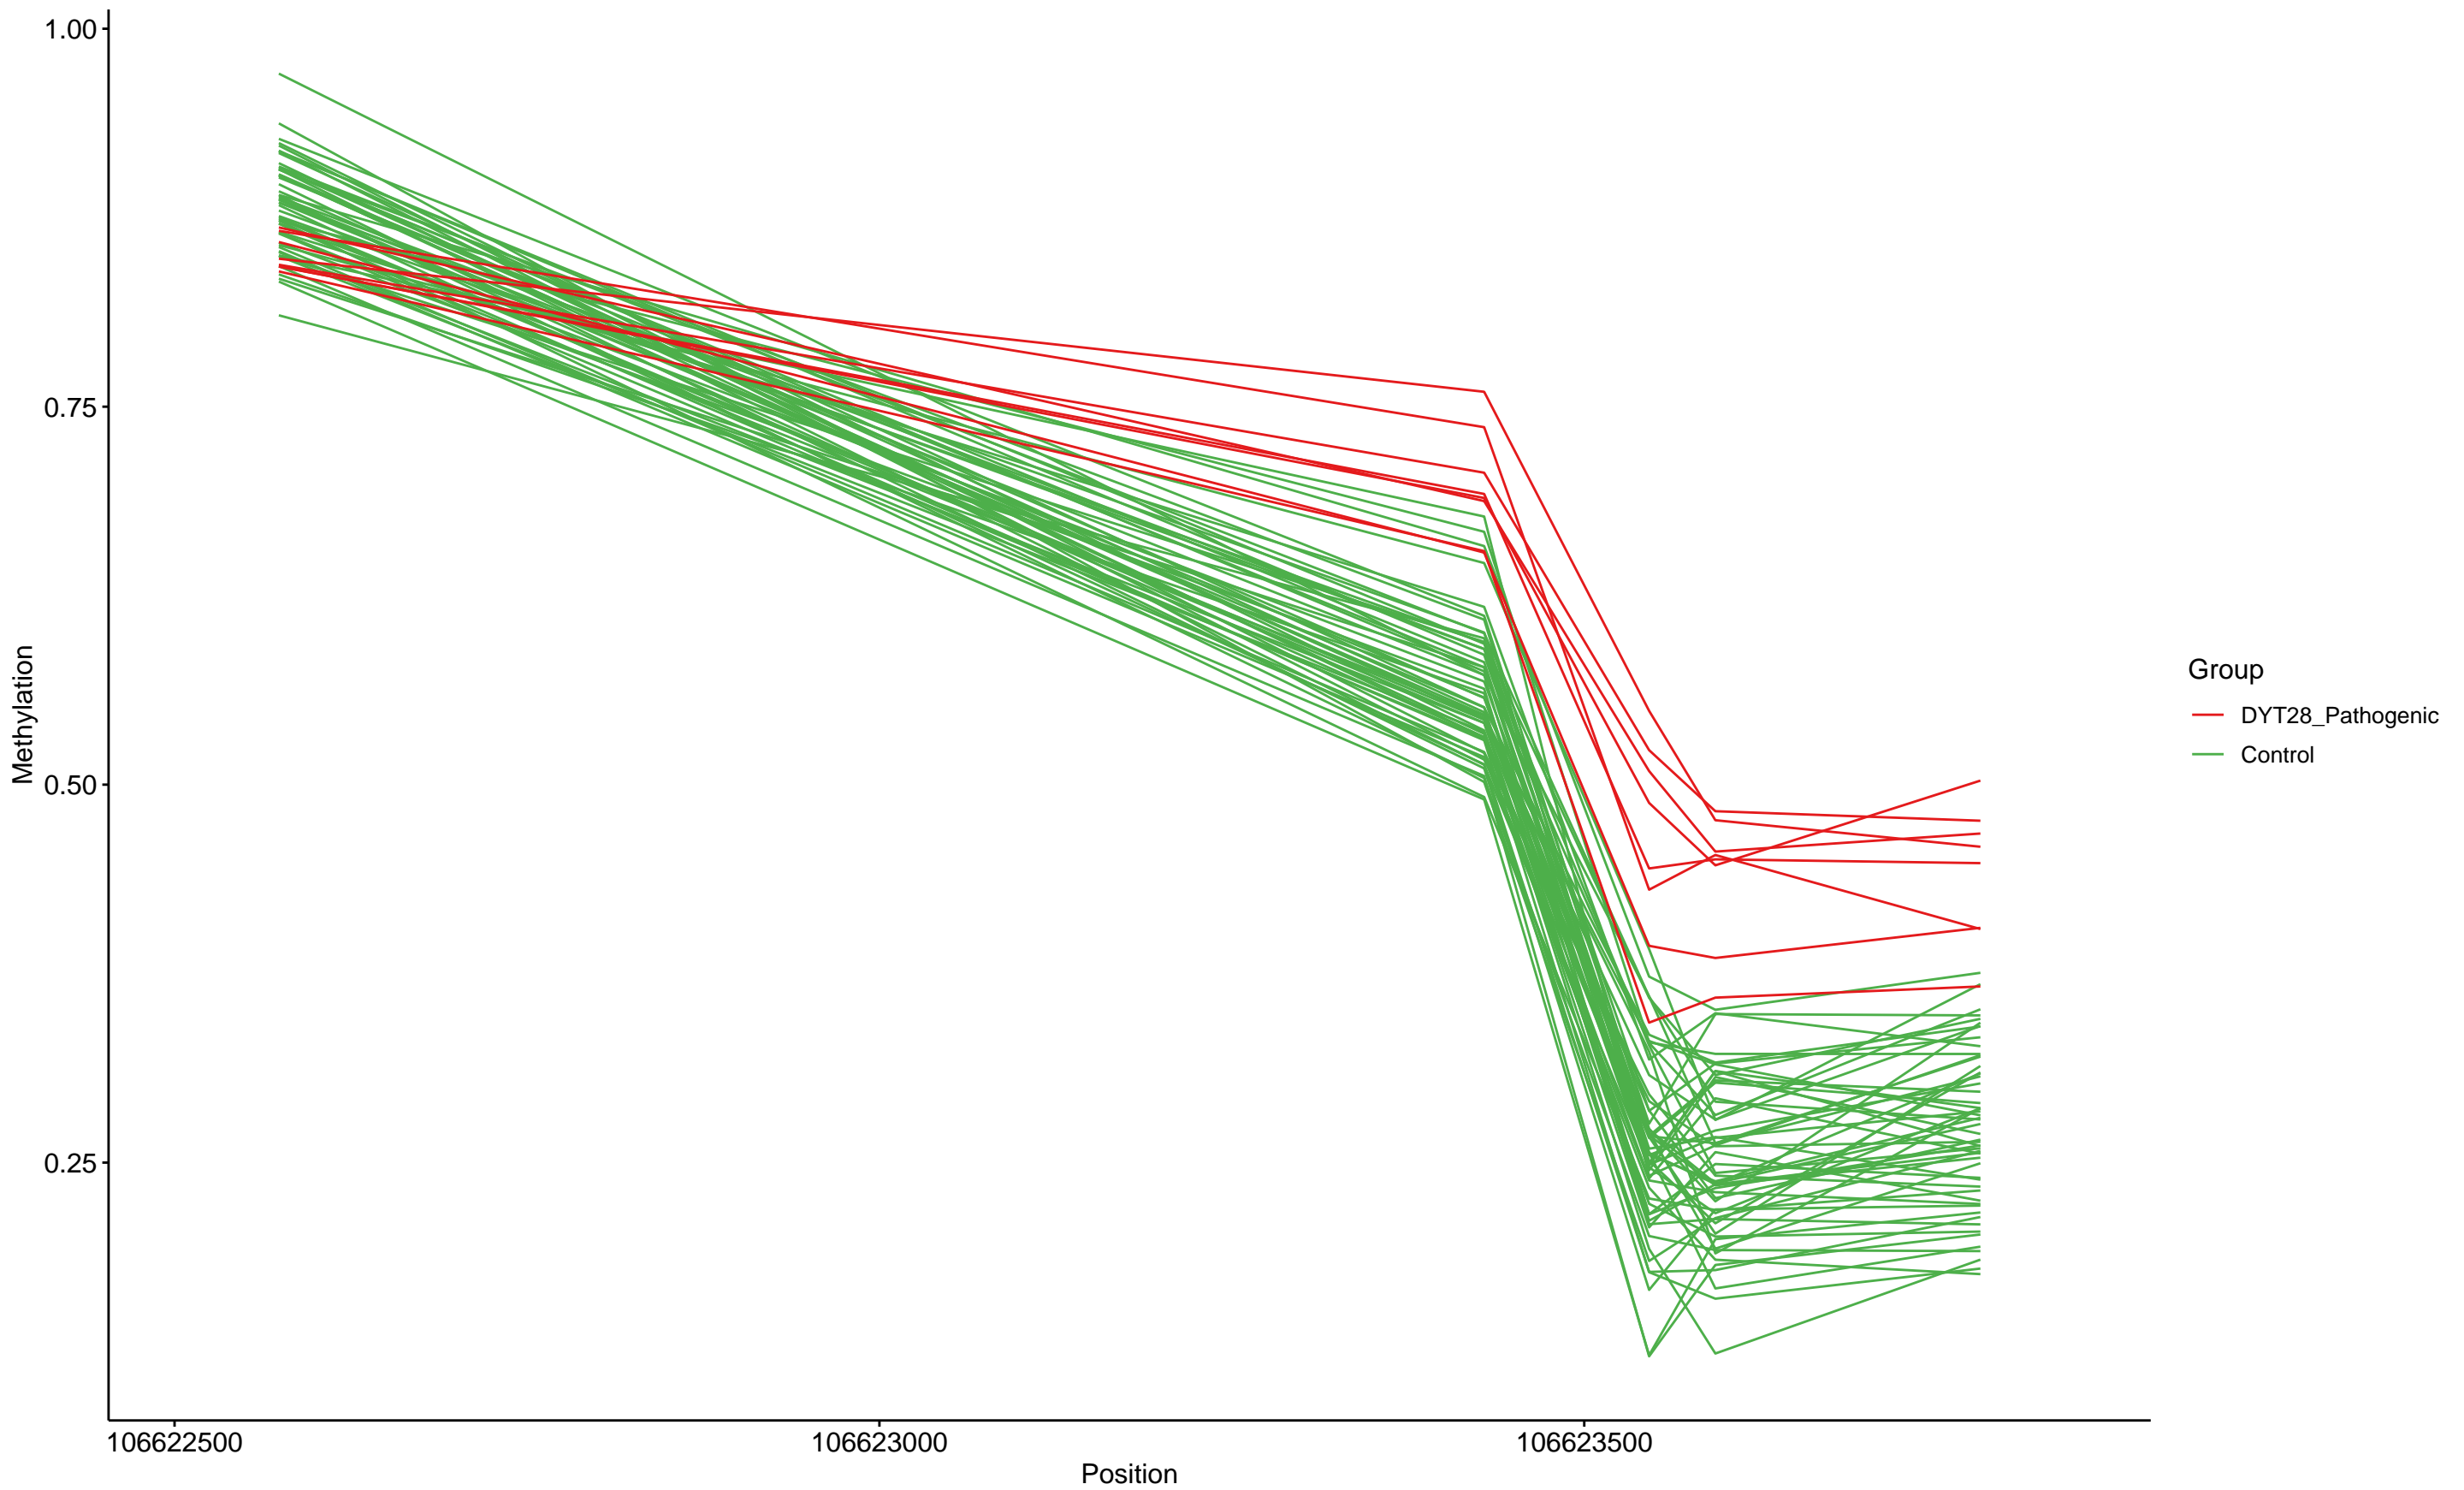

Region 96: chr7:89975159–89976216

Fisher:  $2.49672664842777e-28$

Stouffer:  $2.63090500678596e-21$

Mean difference: 0.102532570612731

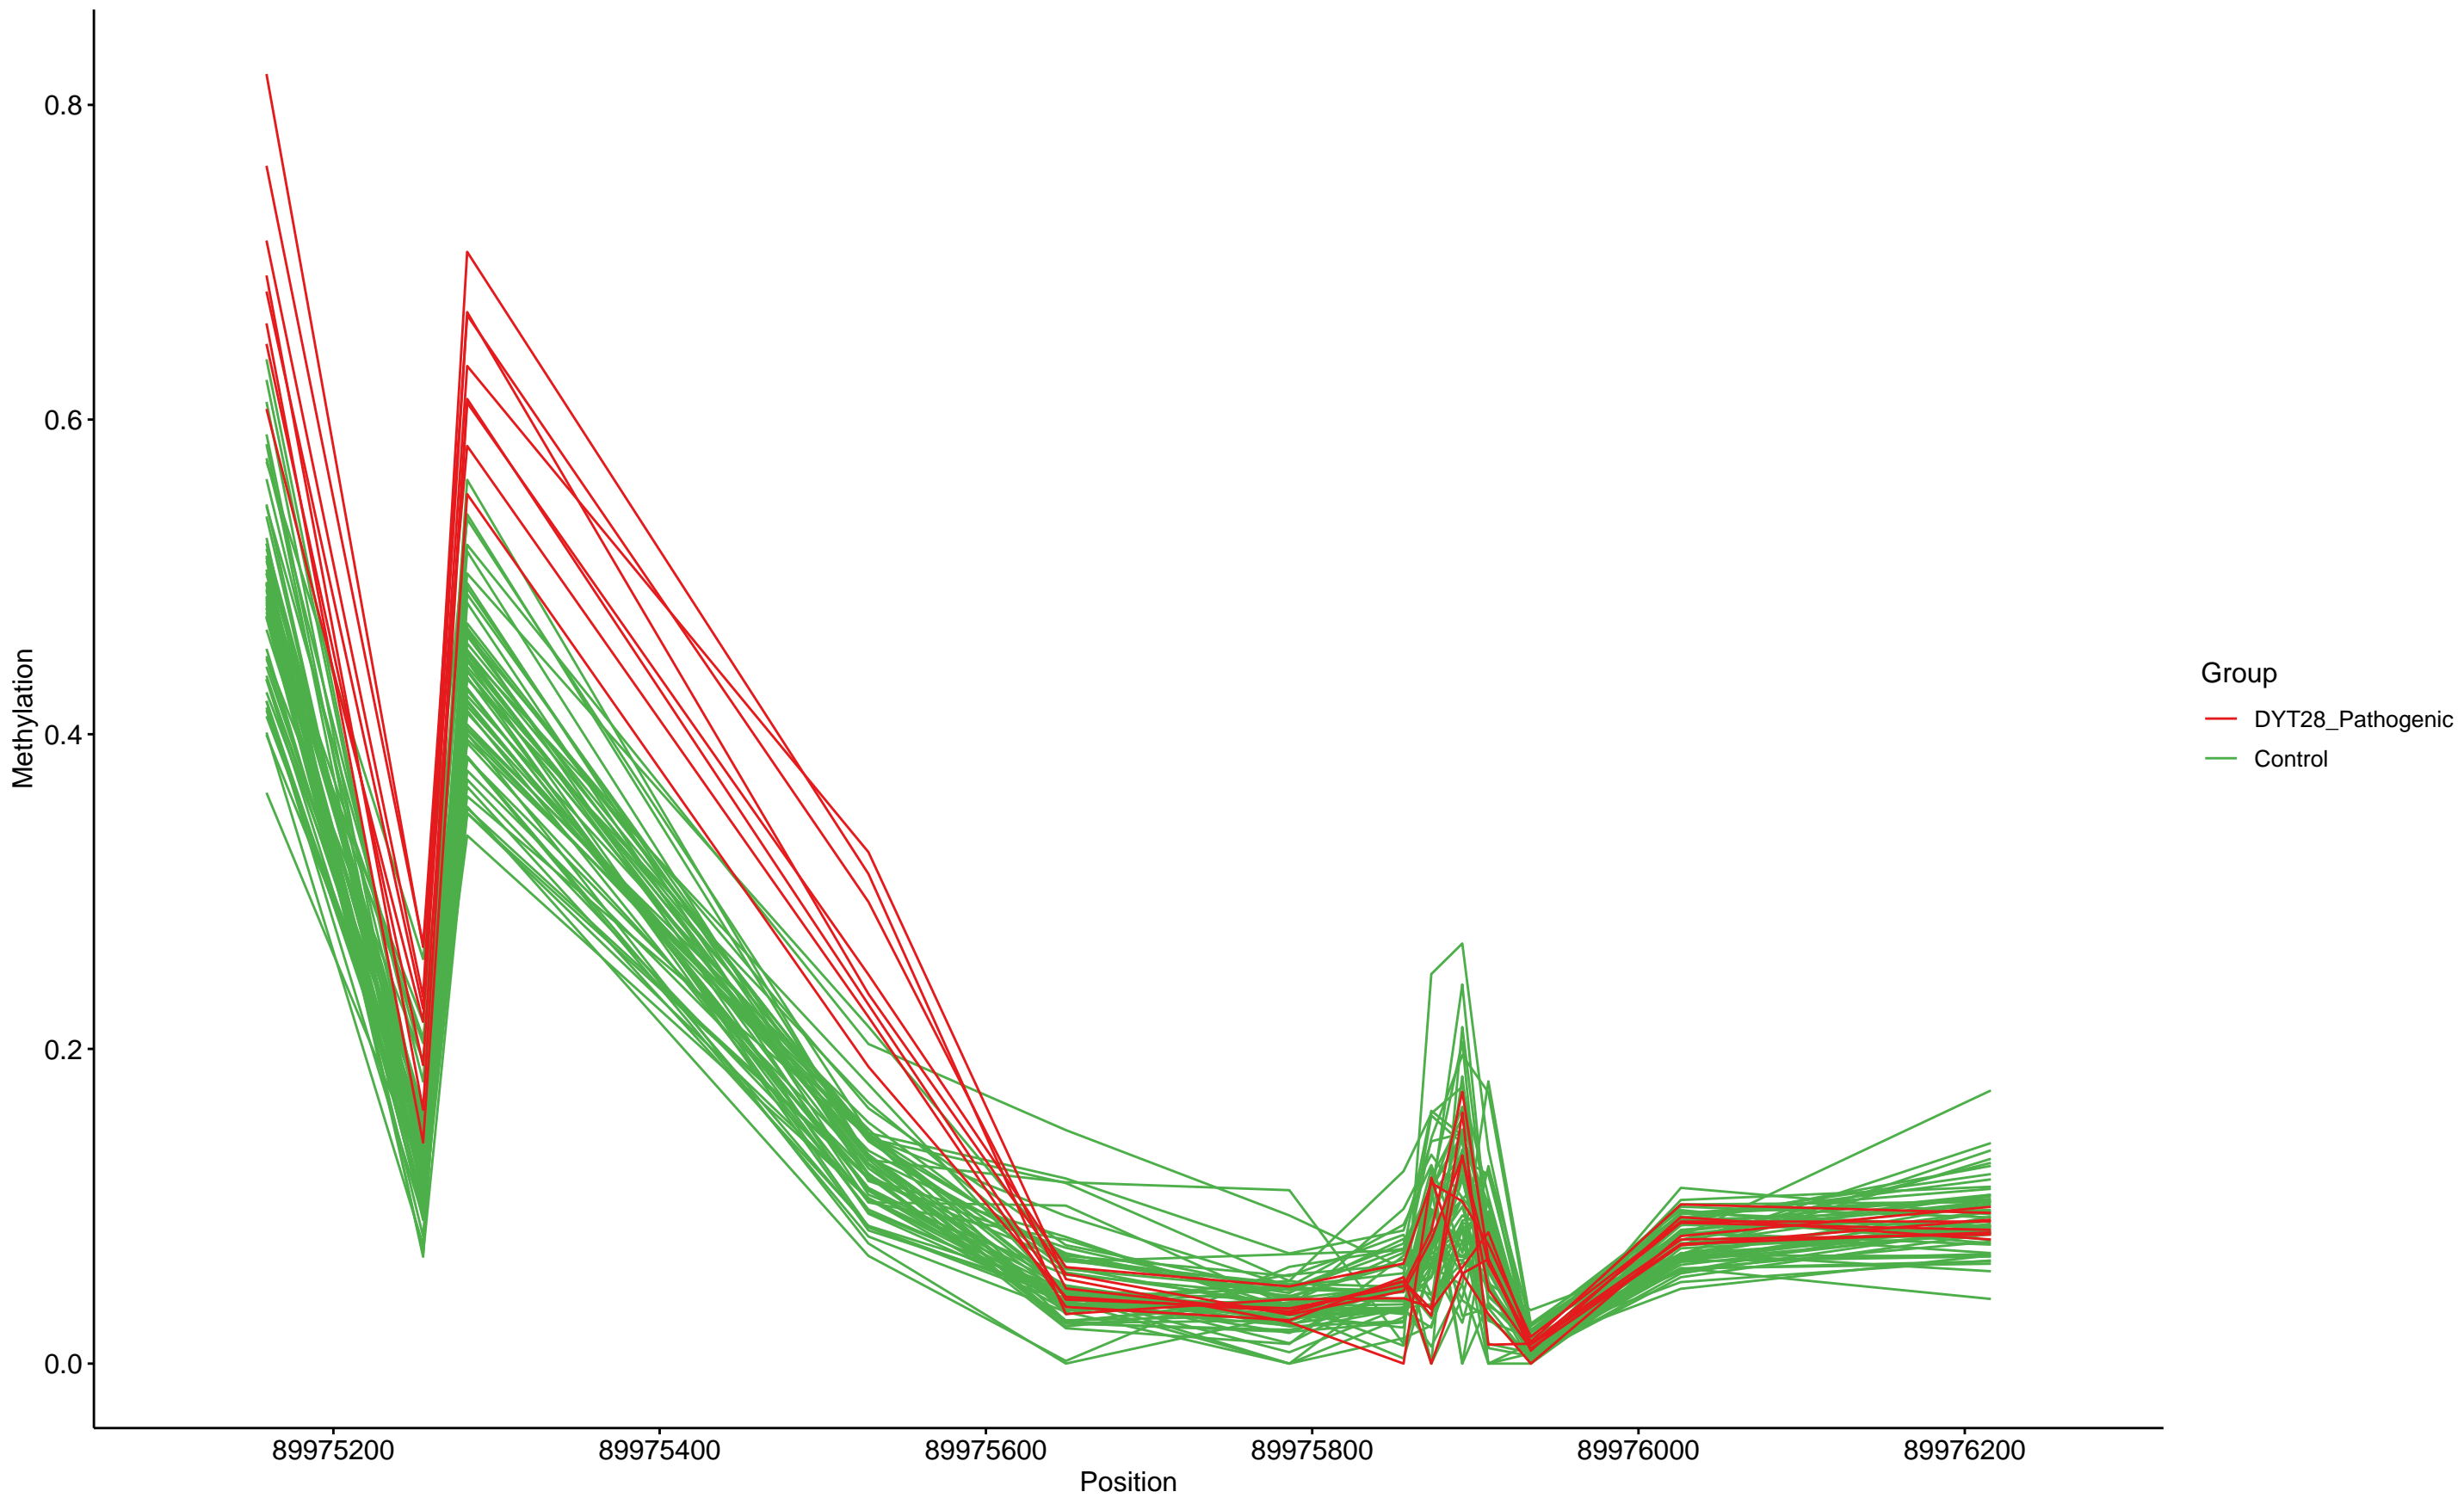



Region 97: chr2:118942638–118943184

Fisher: 3.80547073820079e-28

Stouffer: 1.10453807682285e-25

Mean difference: 0.10626079868422

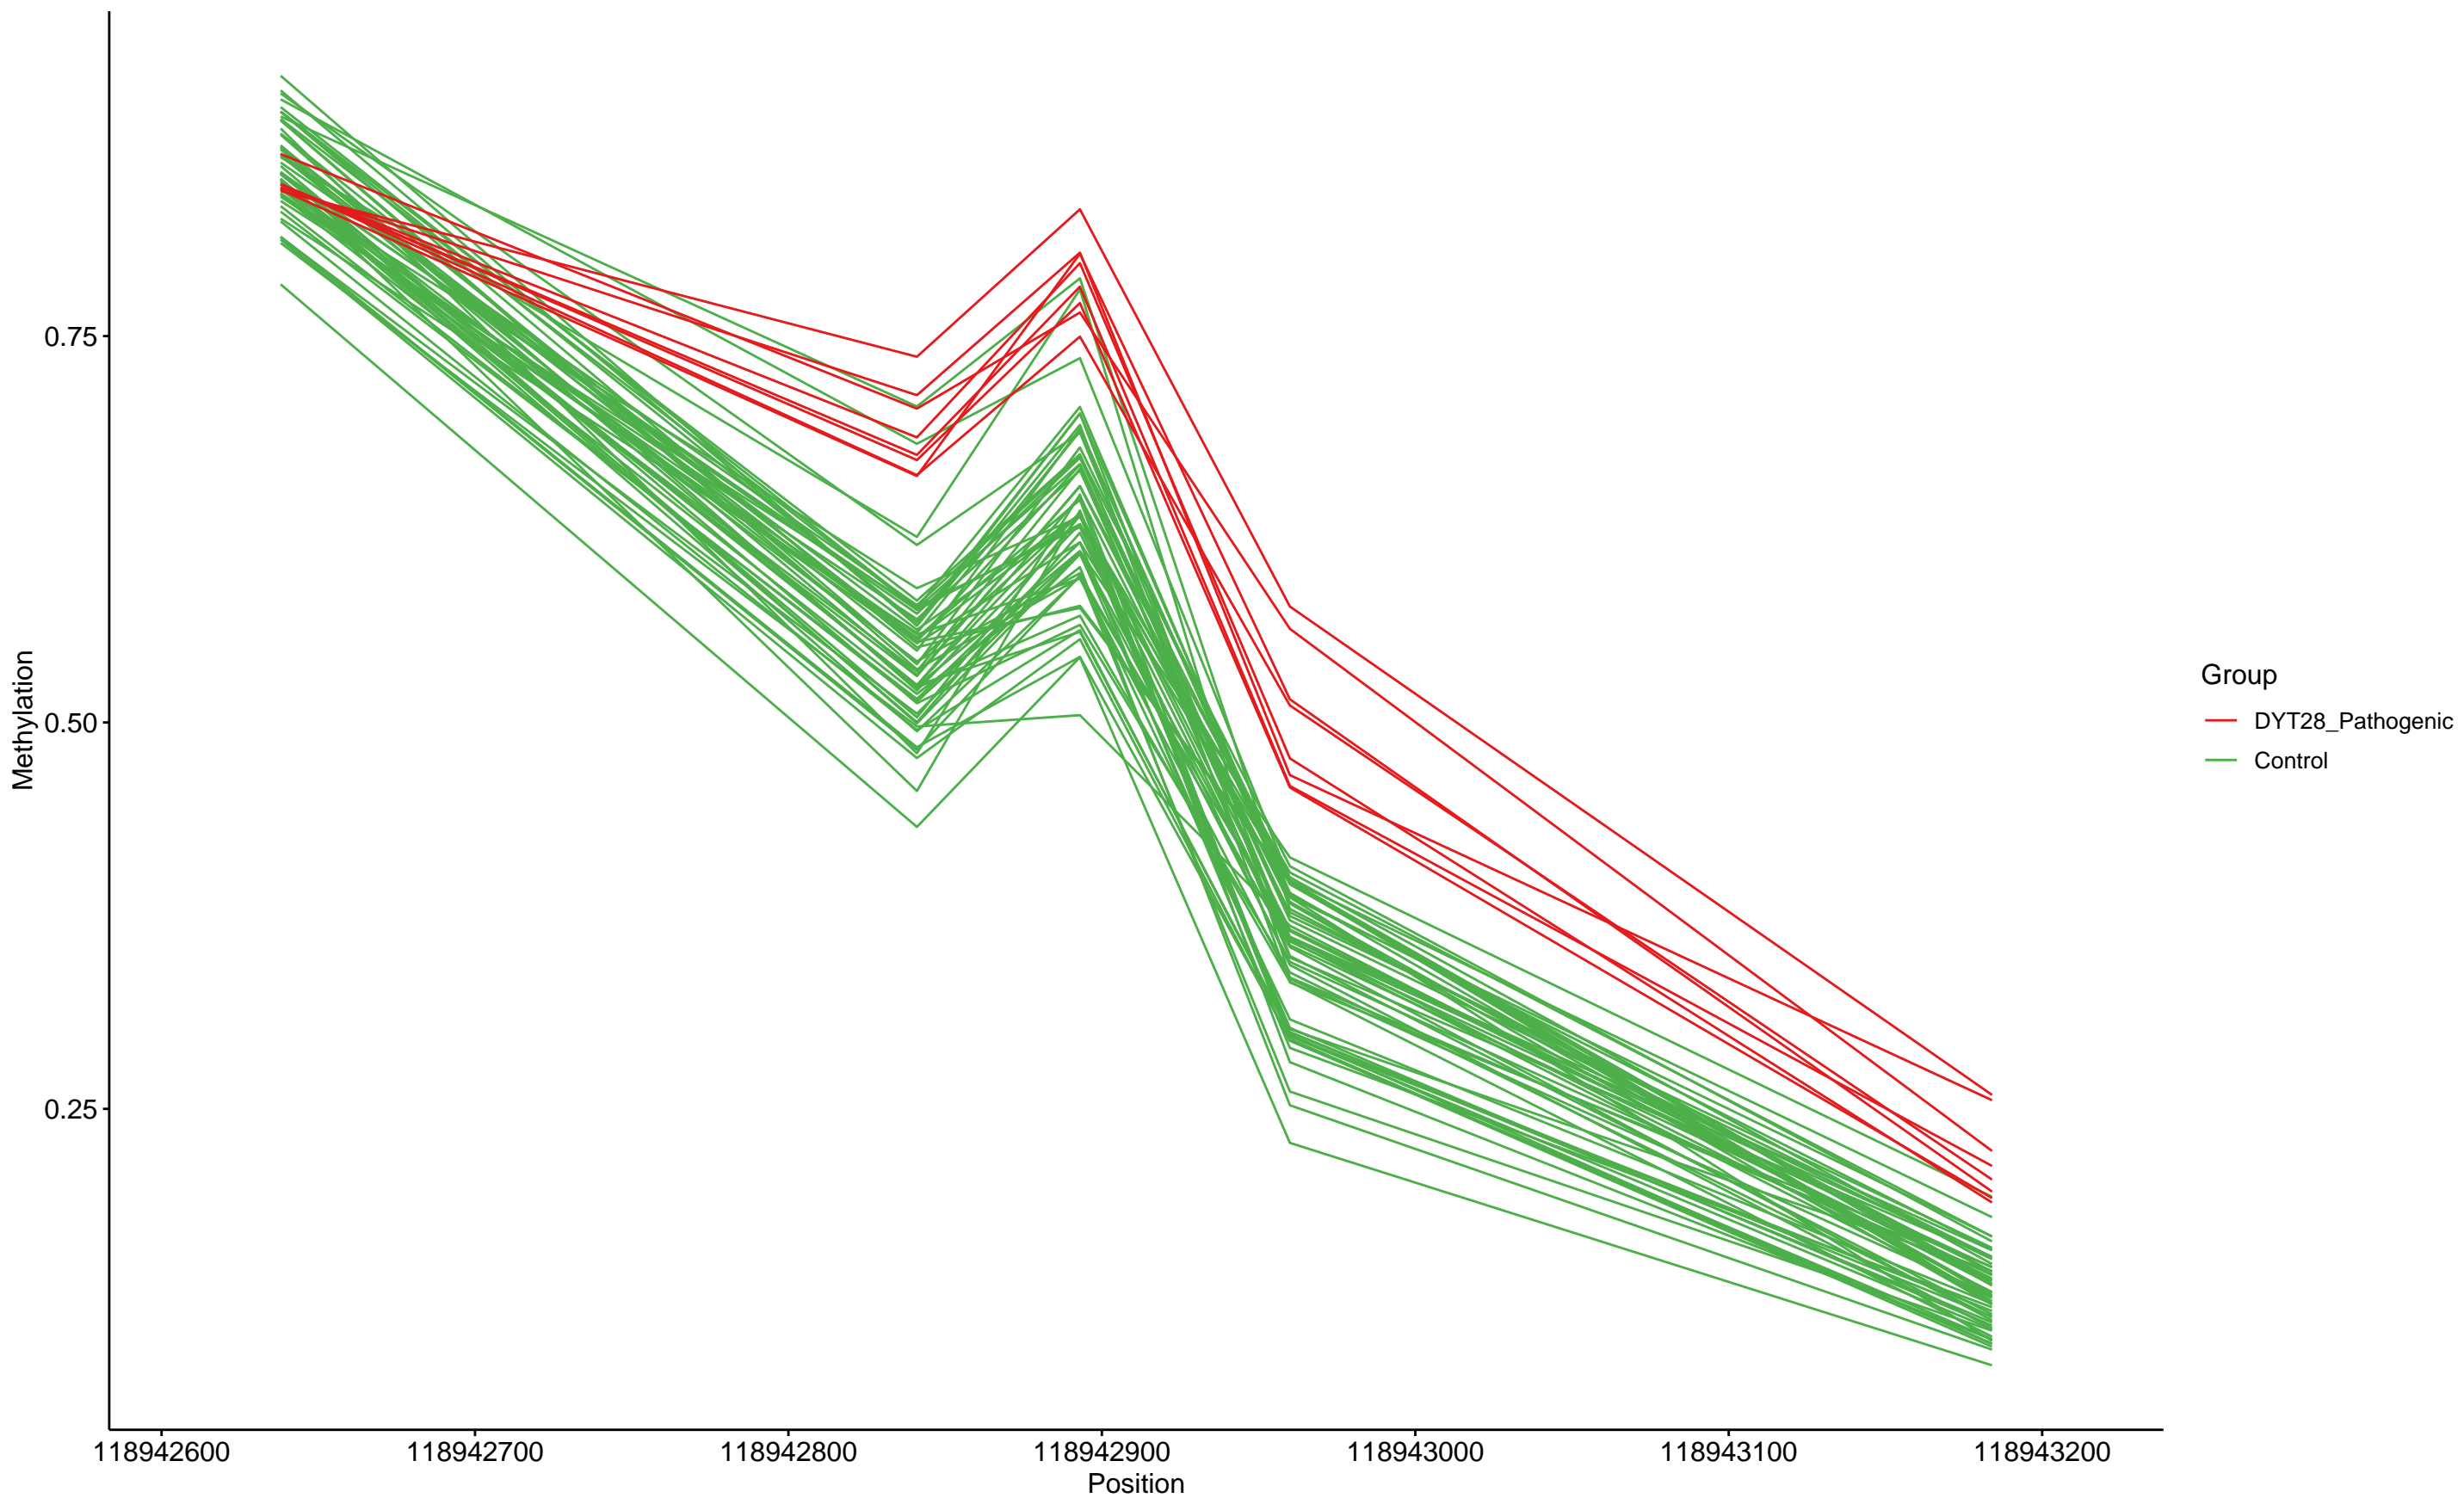

Region 98: chr1:108023249–108023486

Fisher: 1.16748885828732e-26

Stouffer: 6.3922168964062e-29

Mean difference: 0.209139552759359

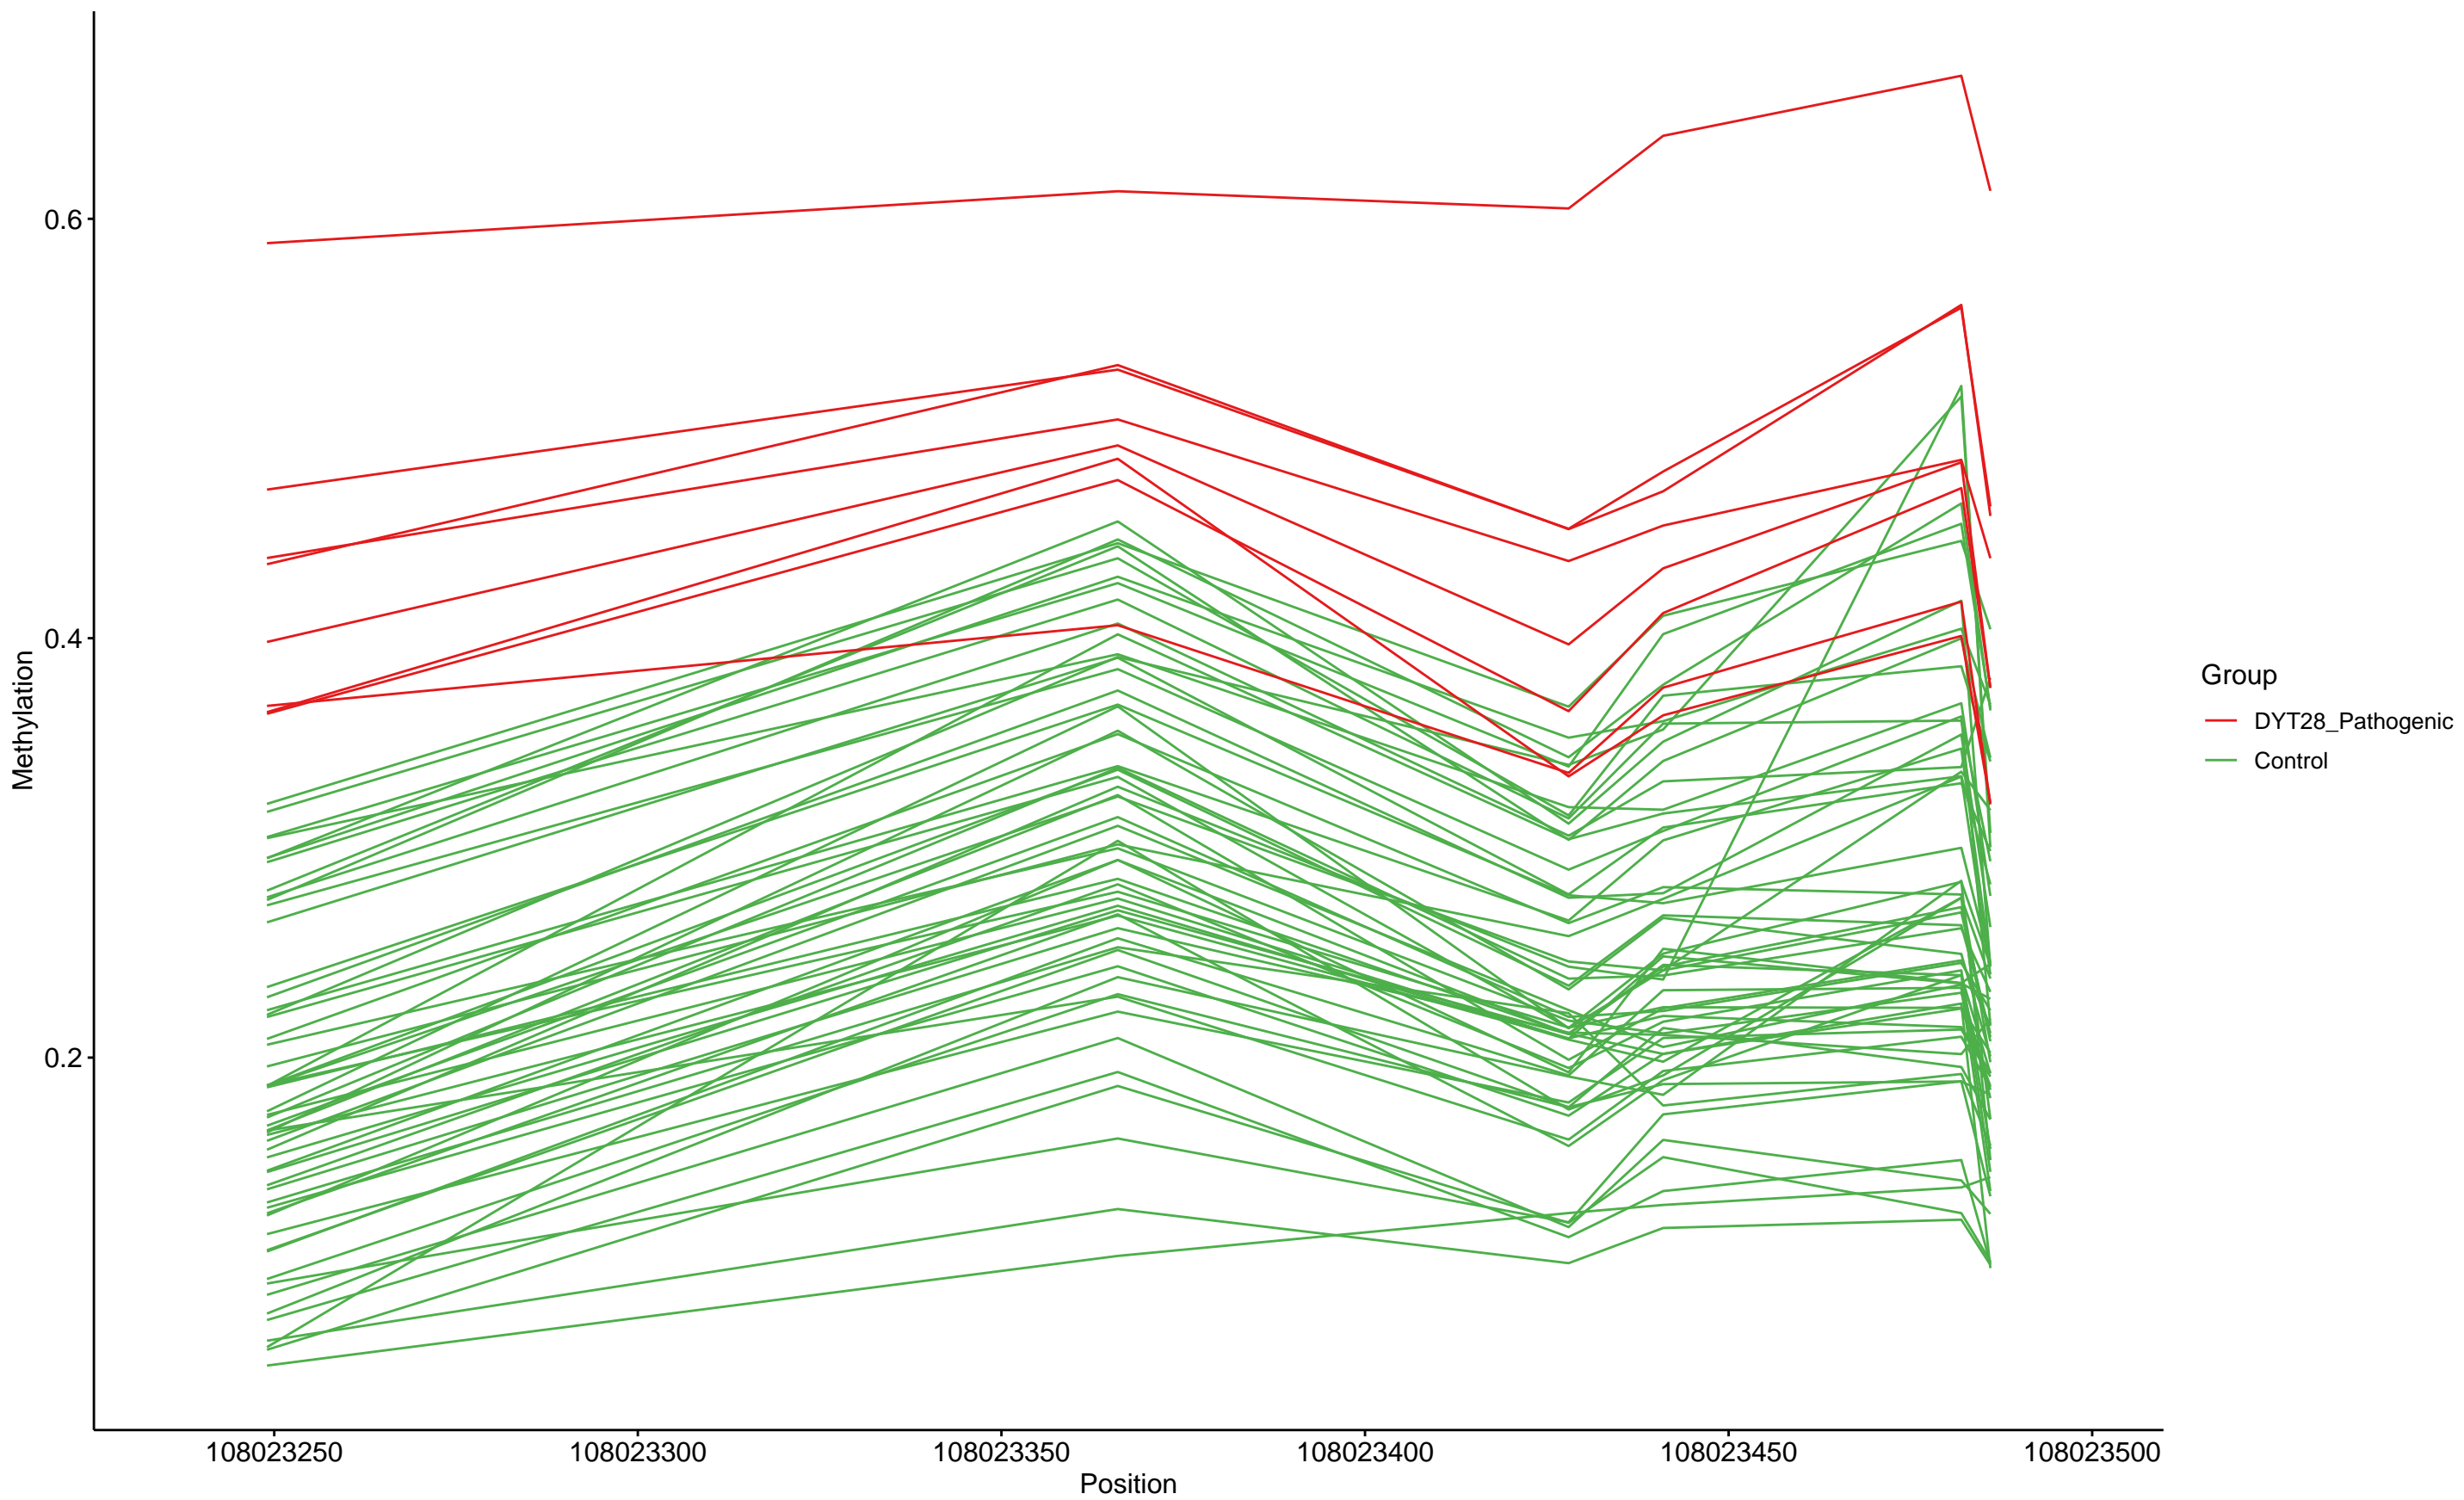

Region 99: chr5:110062384-110062837

Fisher: 2.01763066094682e-26

Stouffer: 1.59493520277688e-28

Mean difference: 0.212069606651882

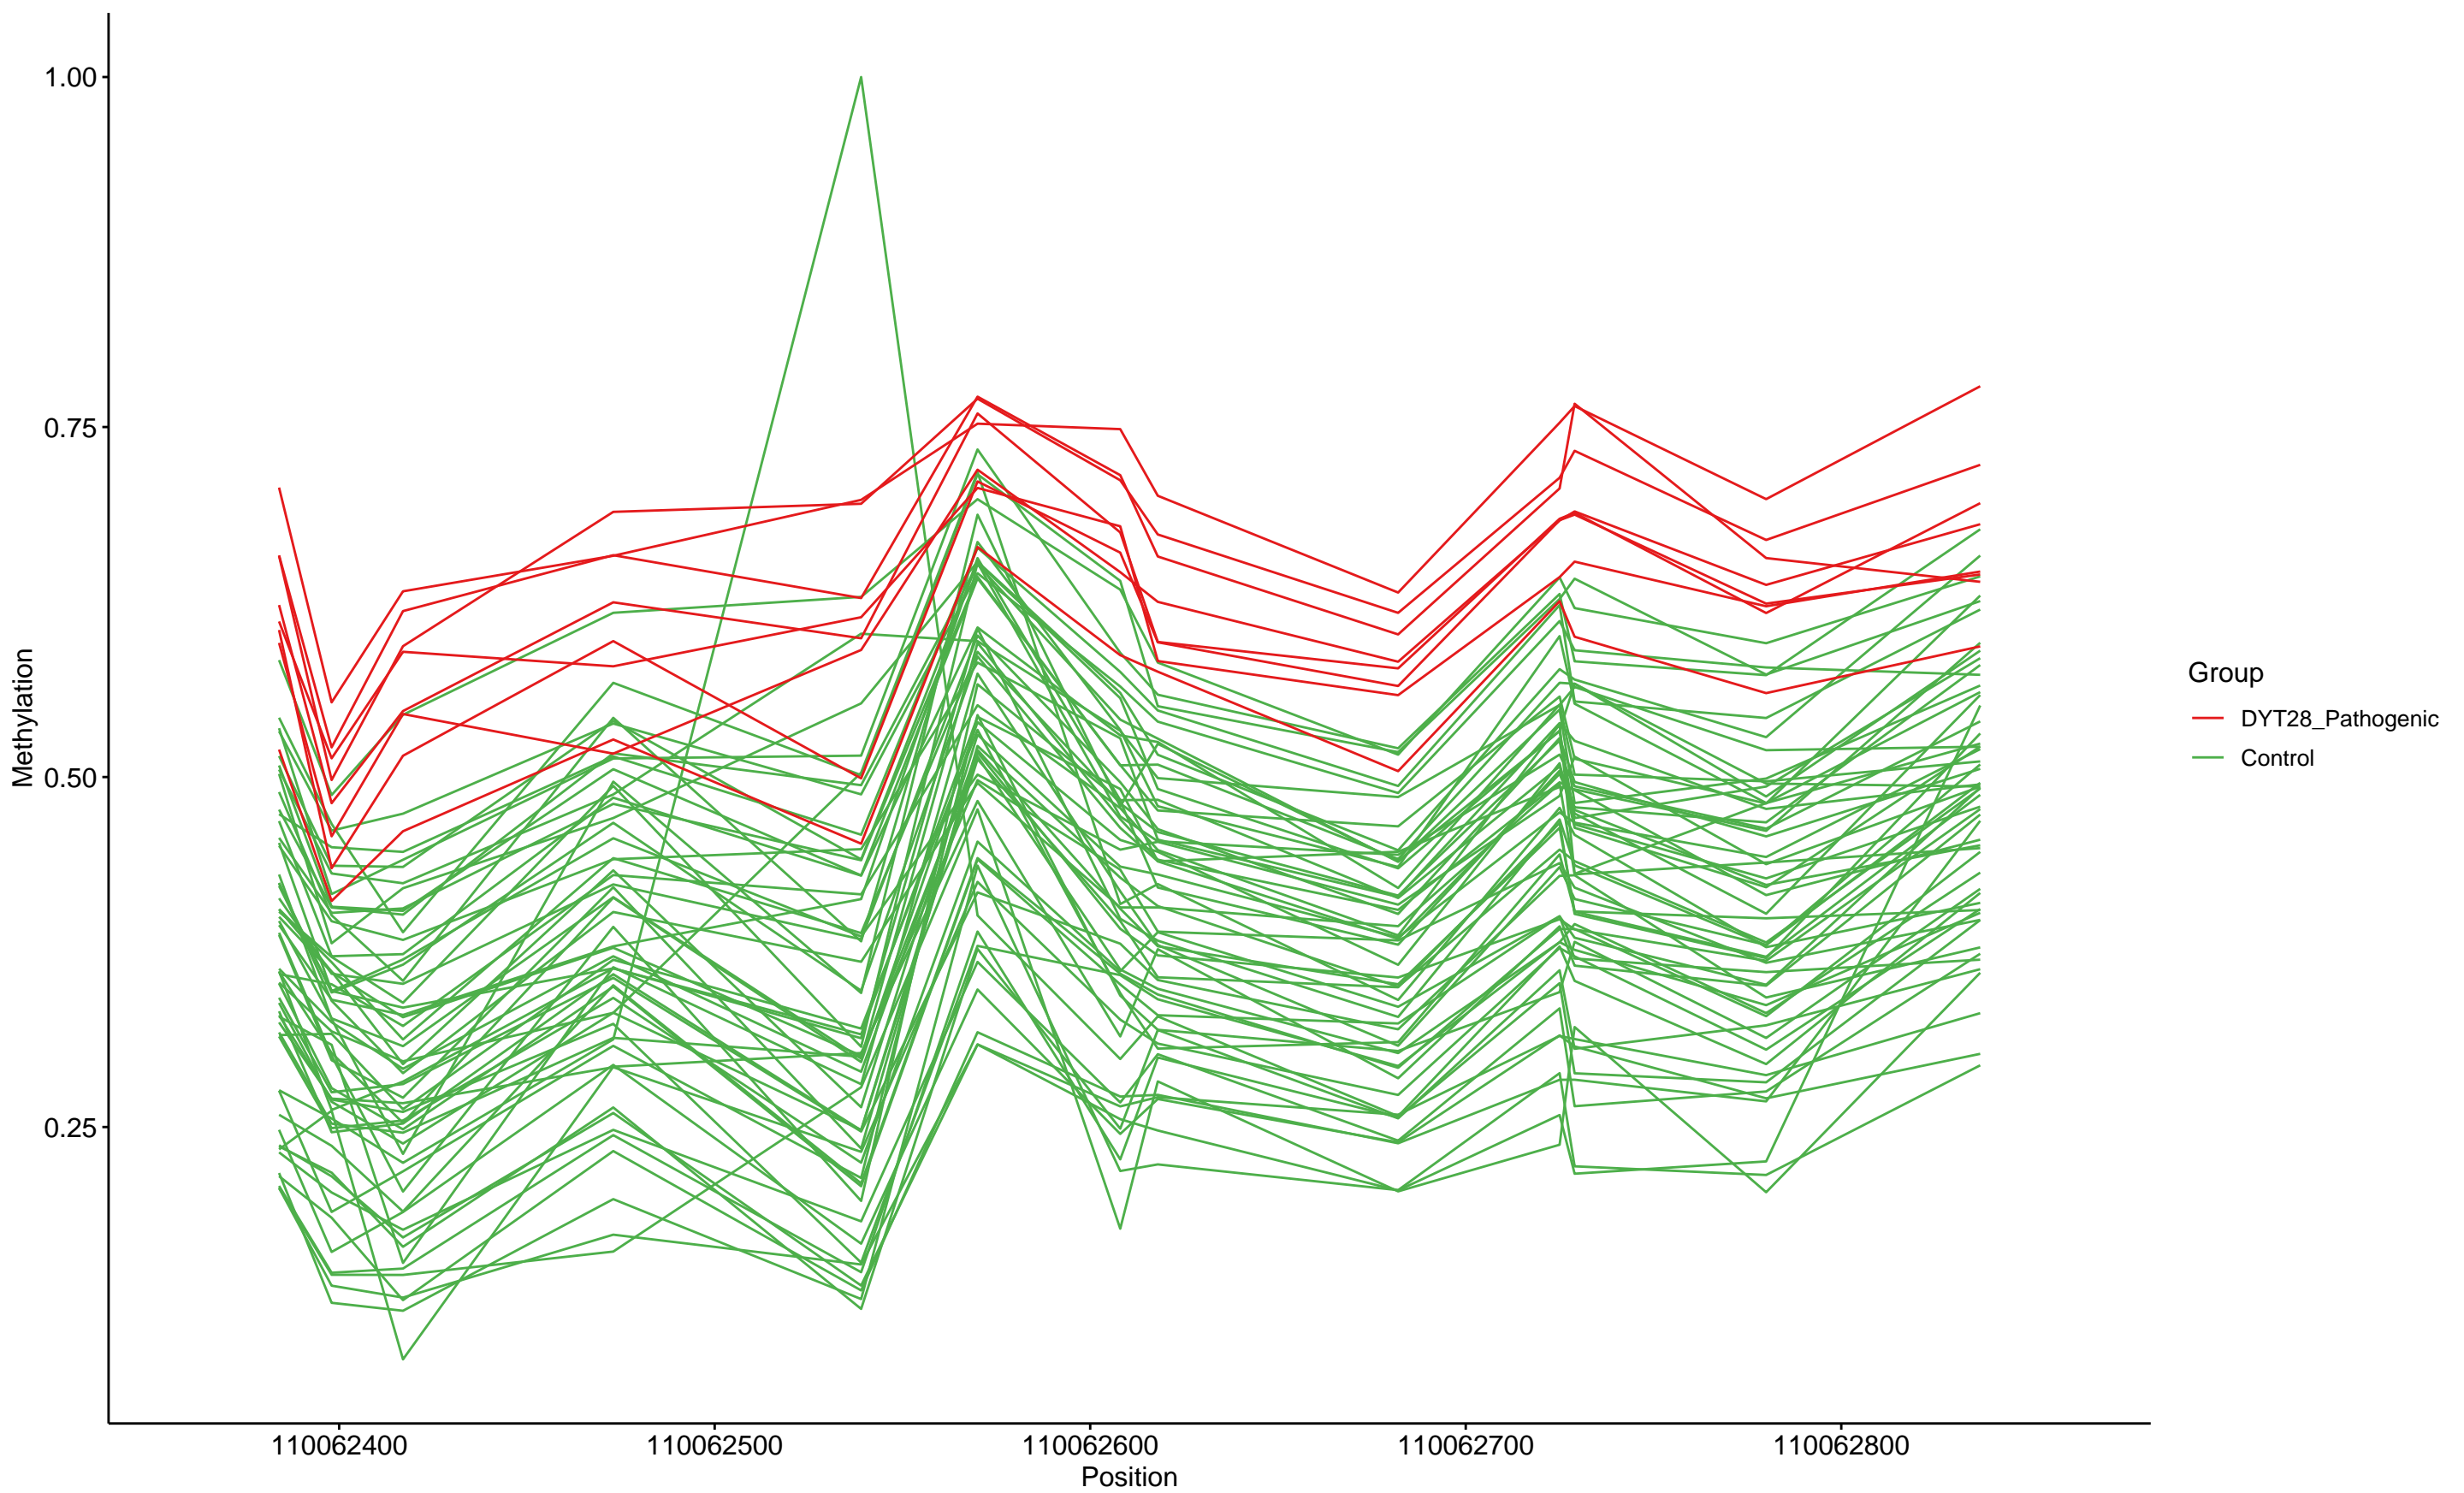



Region 100: chr18:34853689–34855482

Fisher: 2.2276955037518e-26

Stouffer: 1.97534658638666e-19

Mean difference: 0.104049913035111

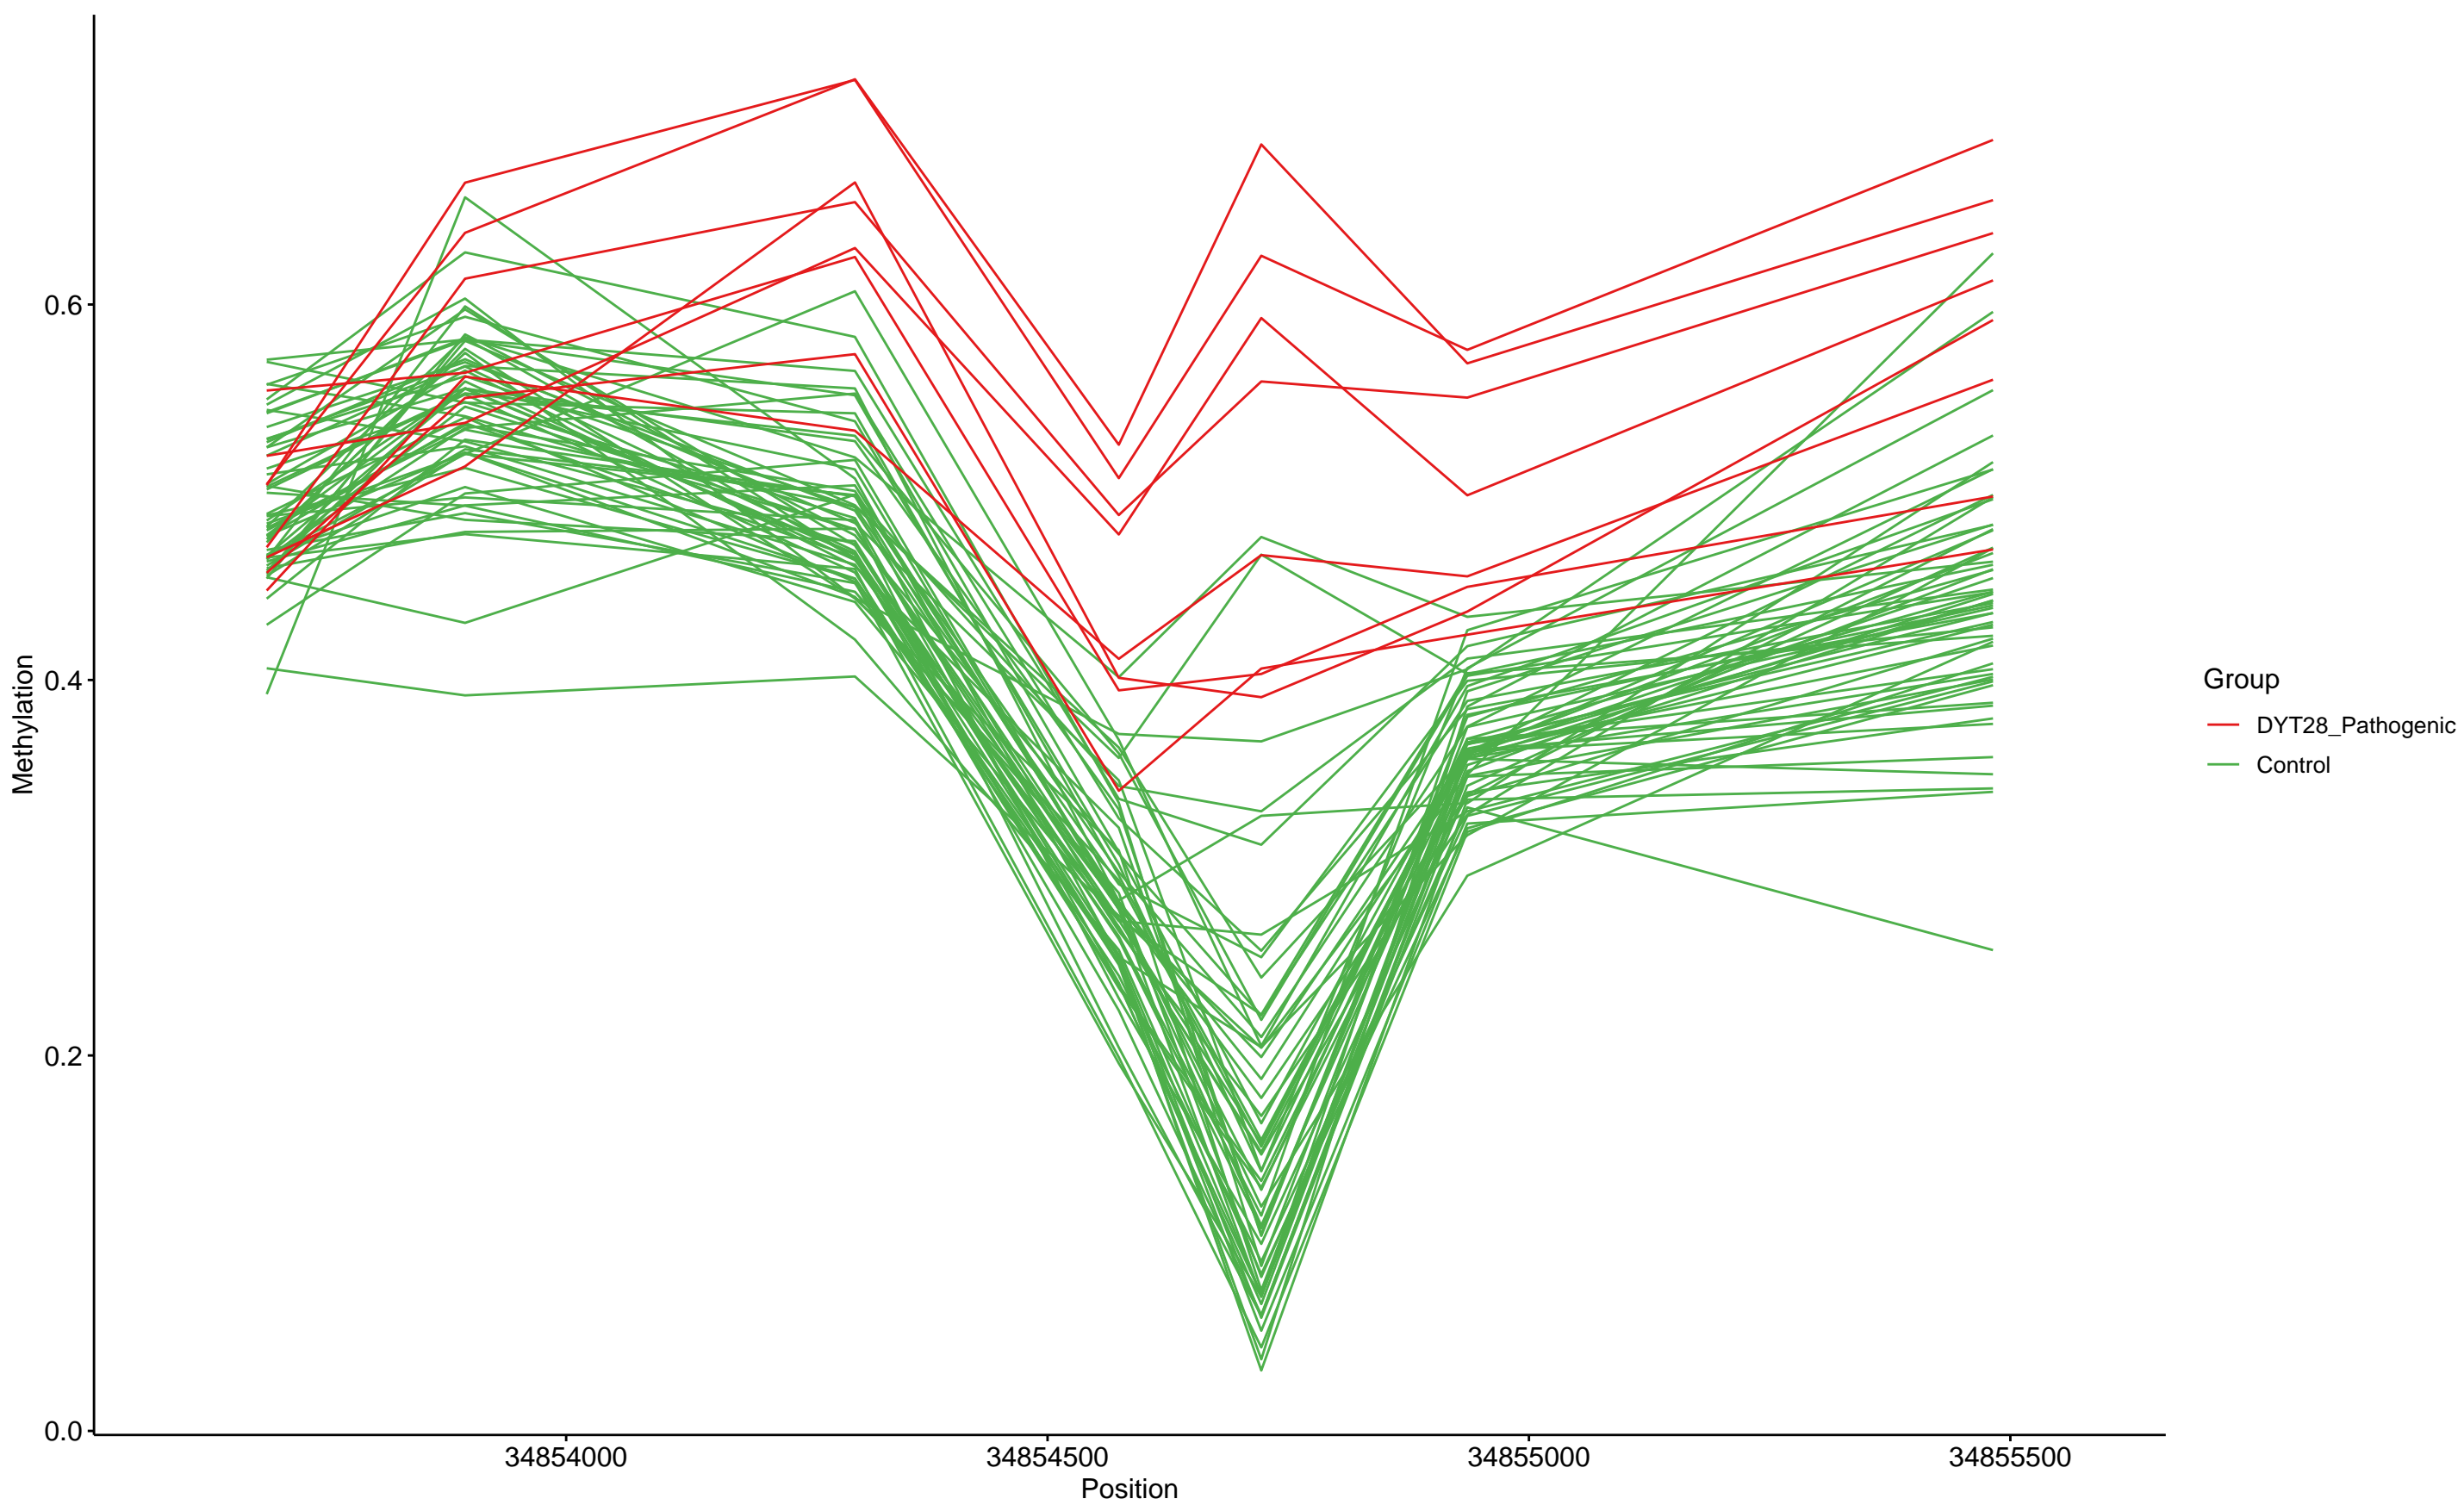



Region 101: chr6:33560953–33561449

Fisher: 1.1053283614721e-25

Stouffer: 1.90538203102461e-26

Mean difference: 0.112084199698275

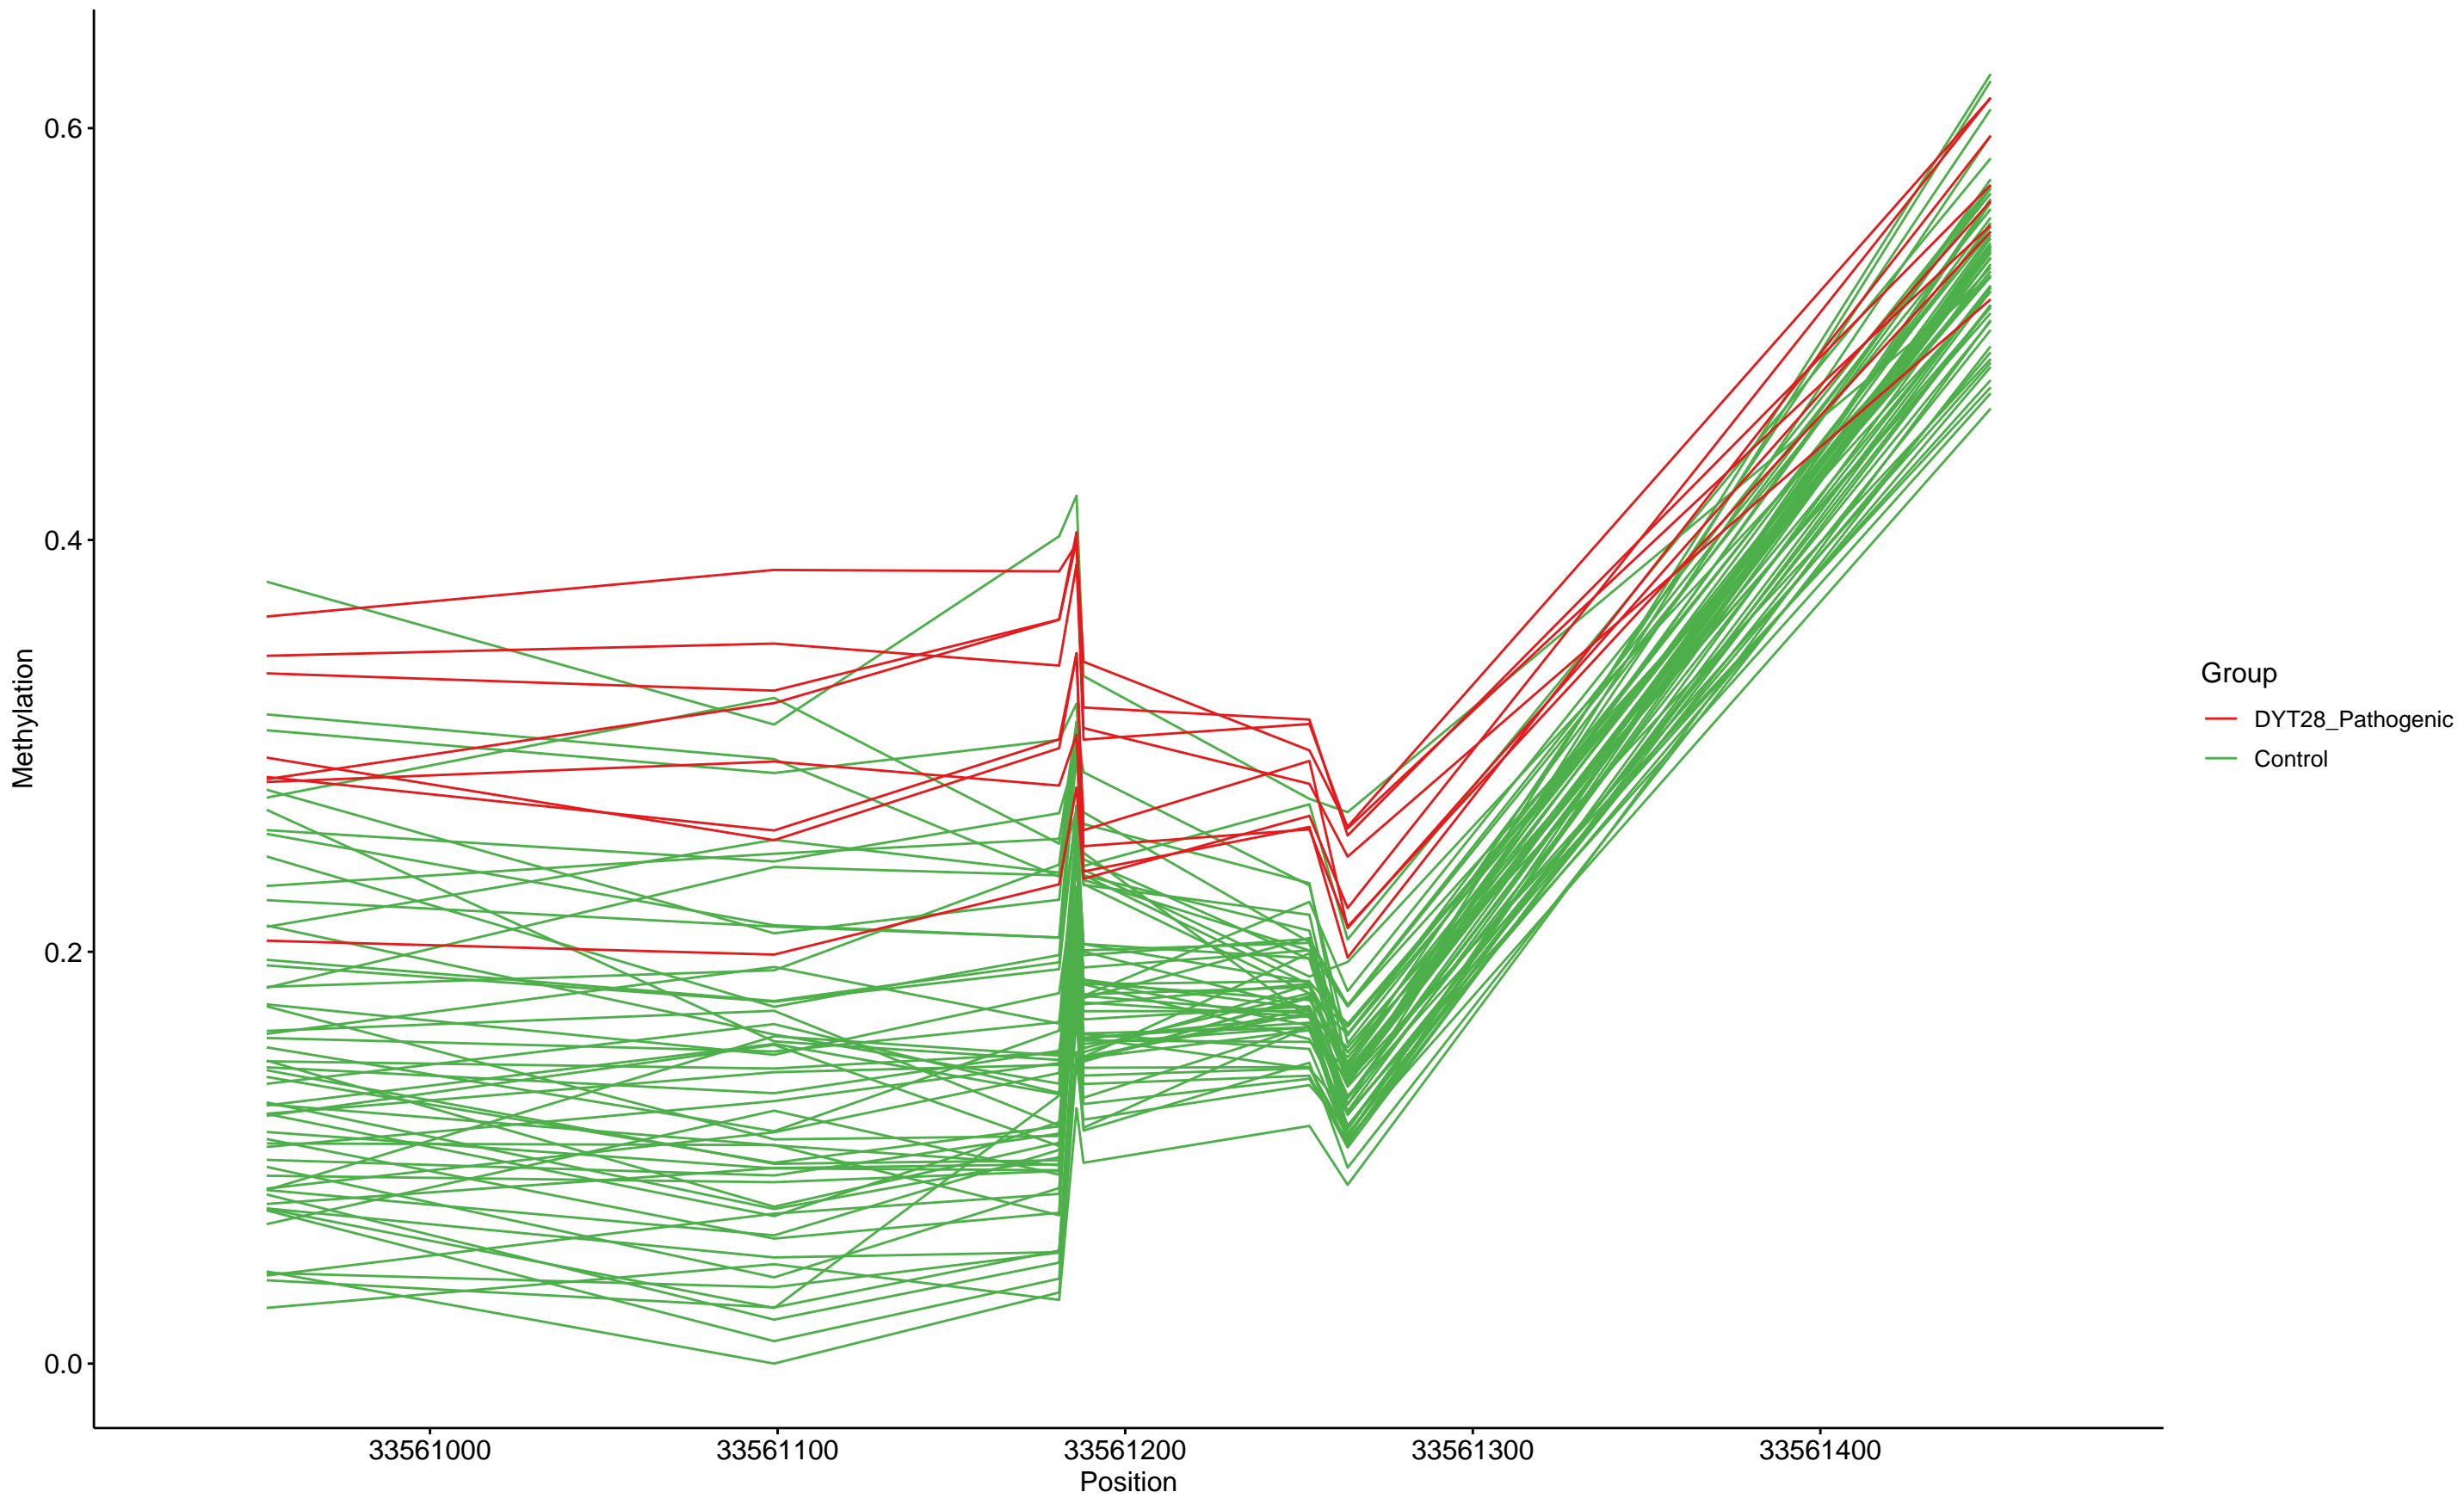

Region 102: chr1:113286397–113287238

Fisher: 1.46713047773962e-25

Stouffer: 1.77654483703504e-27

Mean difference: 0.131606179749431

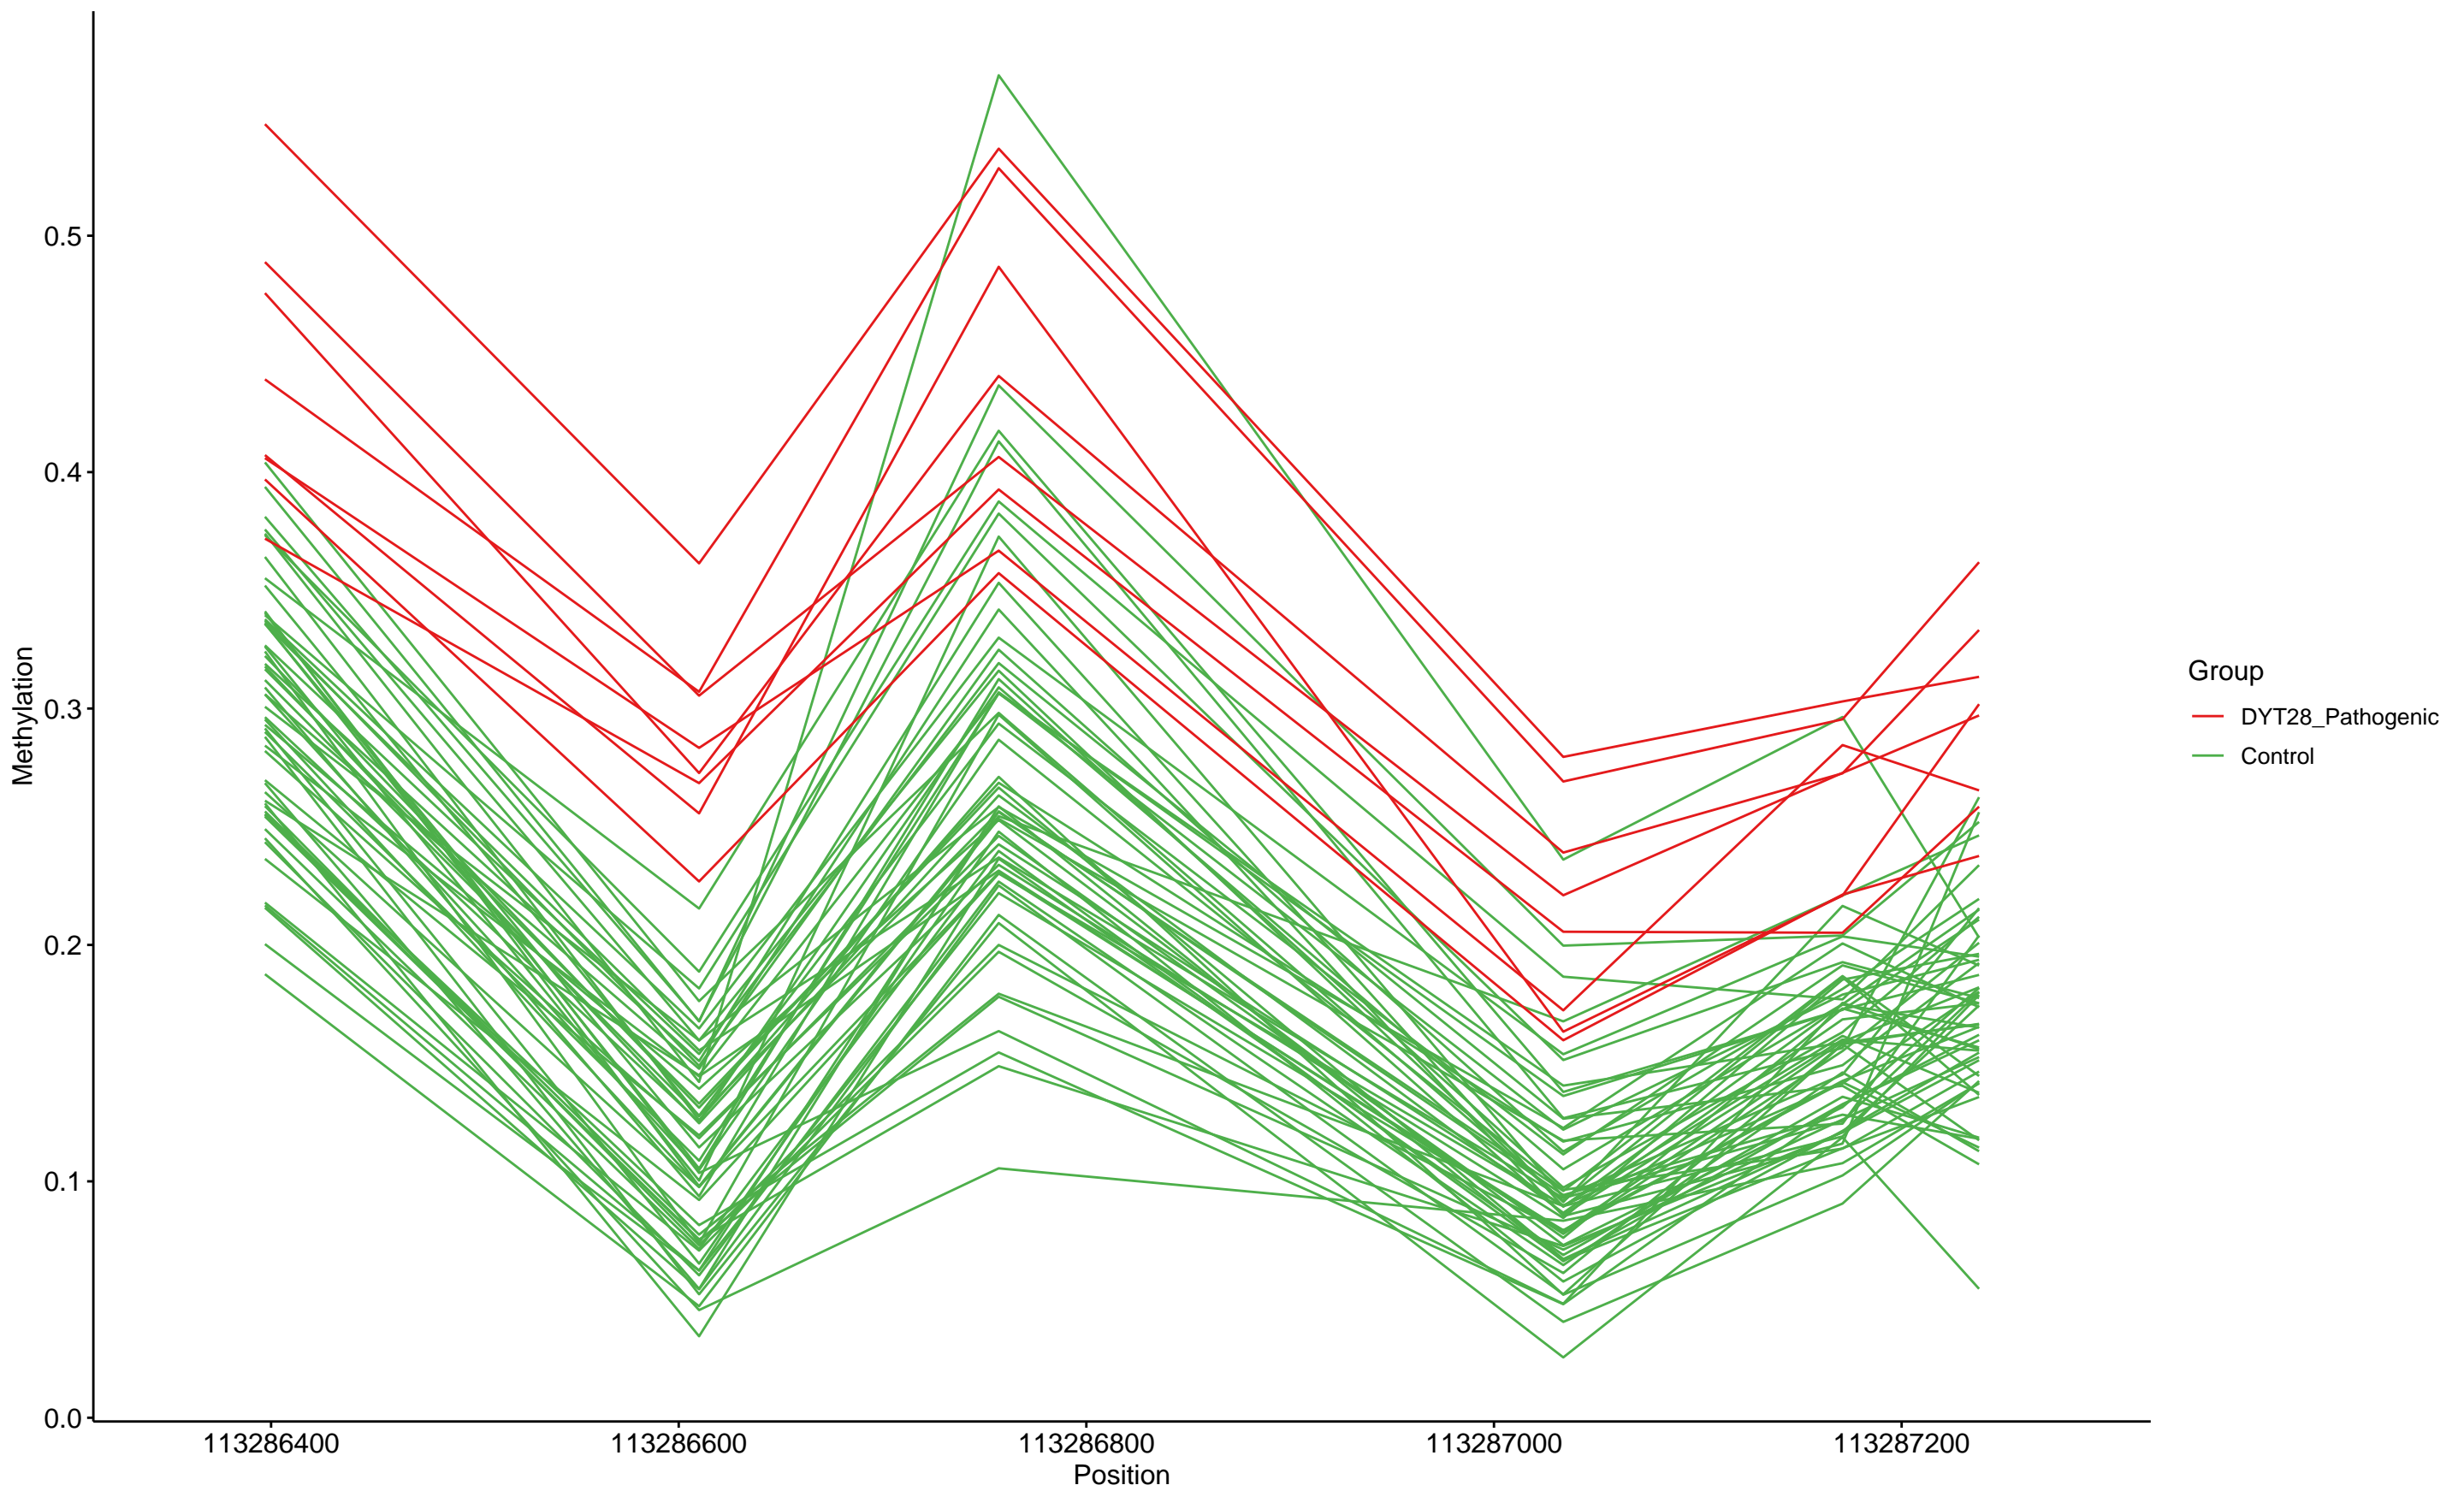

Region 103: chr6:87861261-87862481

Fisher: 2.09896294653434e-25

Stouffer: 9.01750180626248e-27

Mean difference: 0.151039786001576

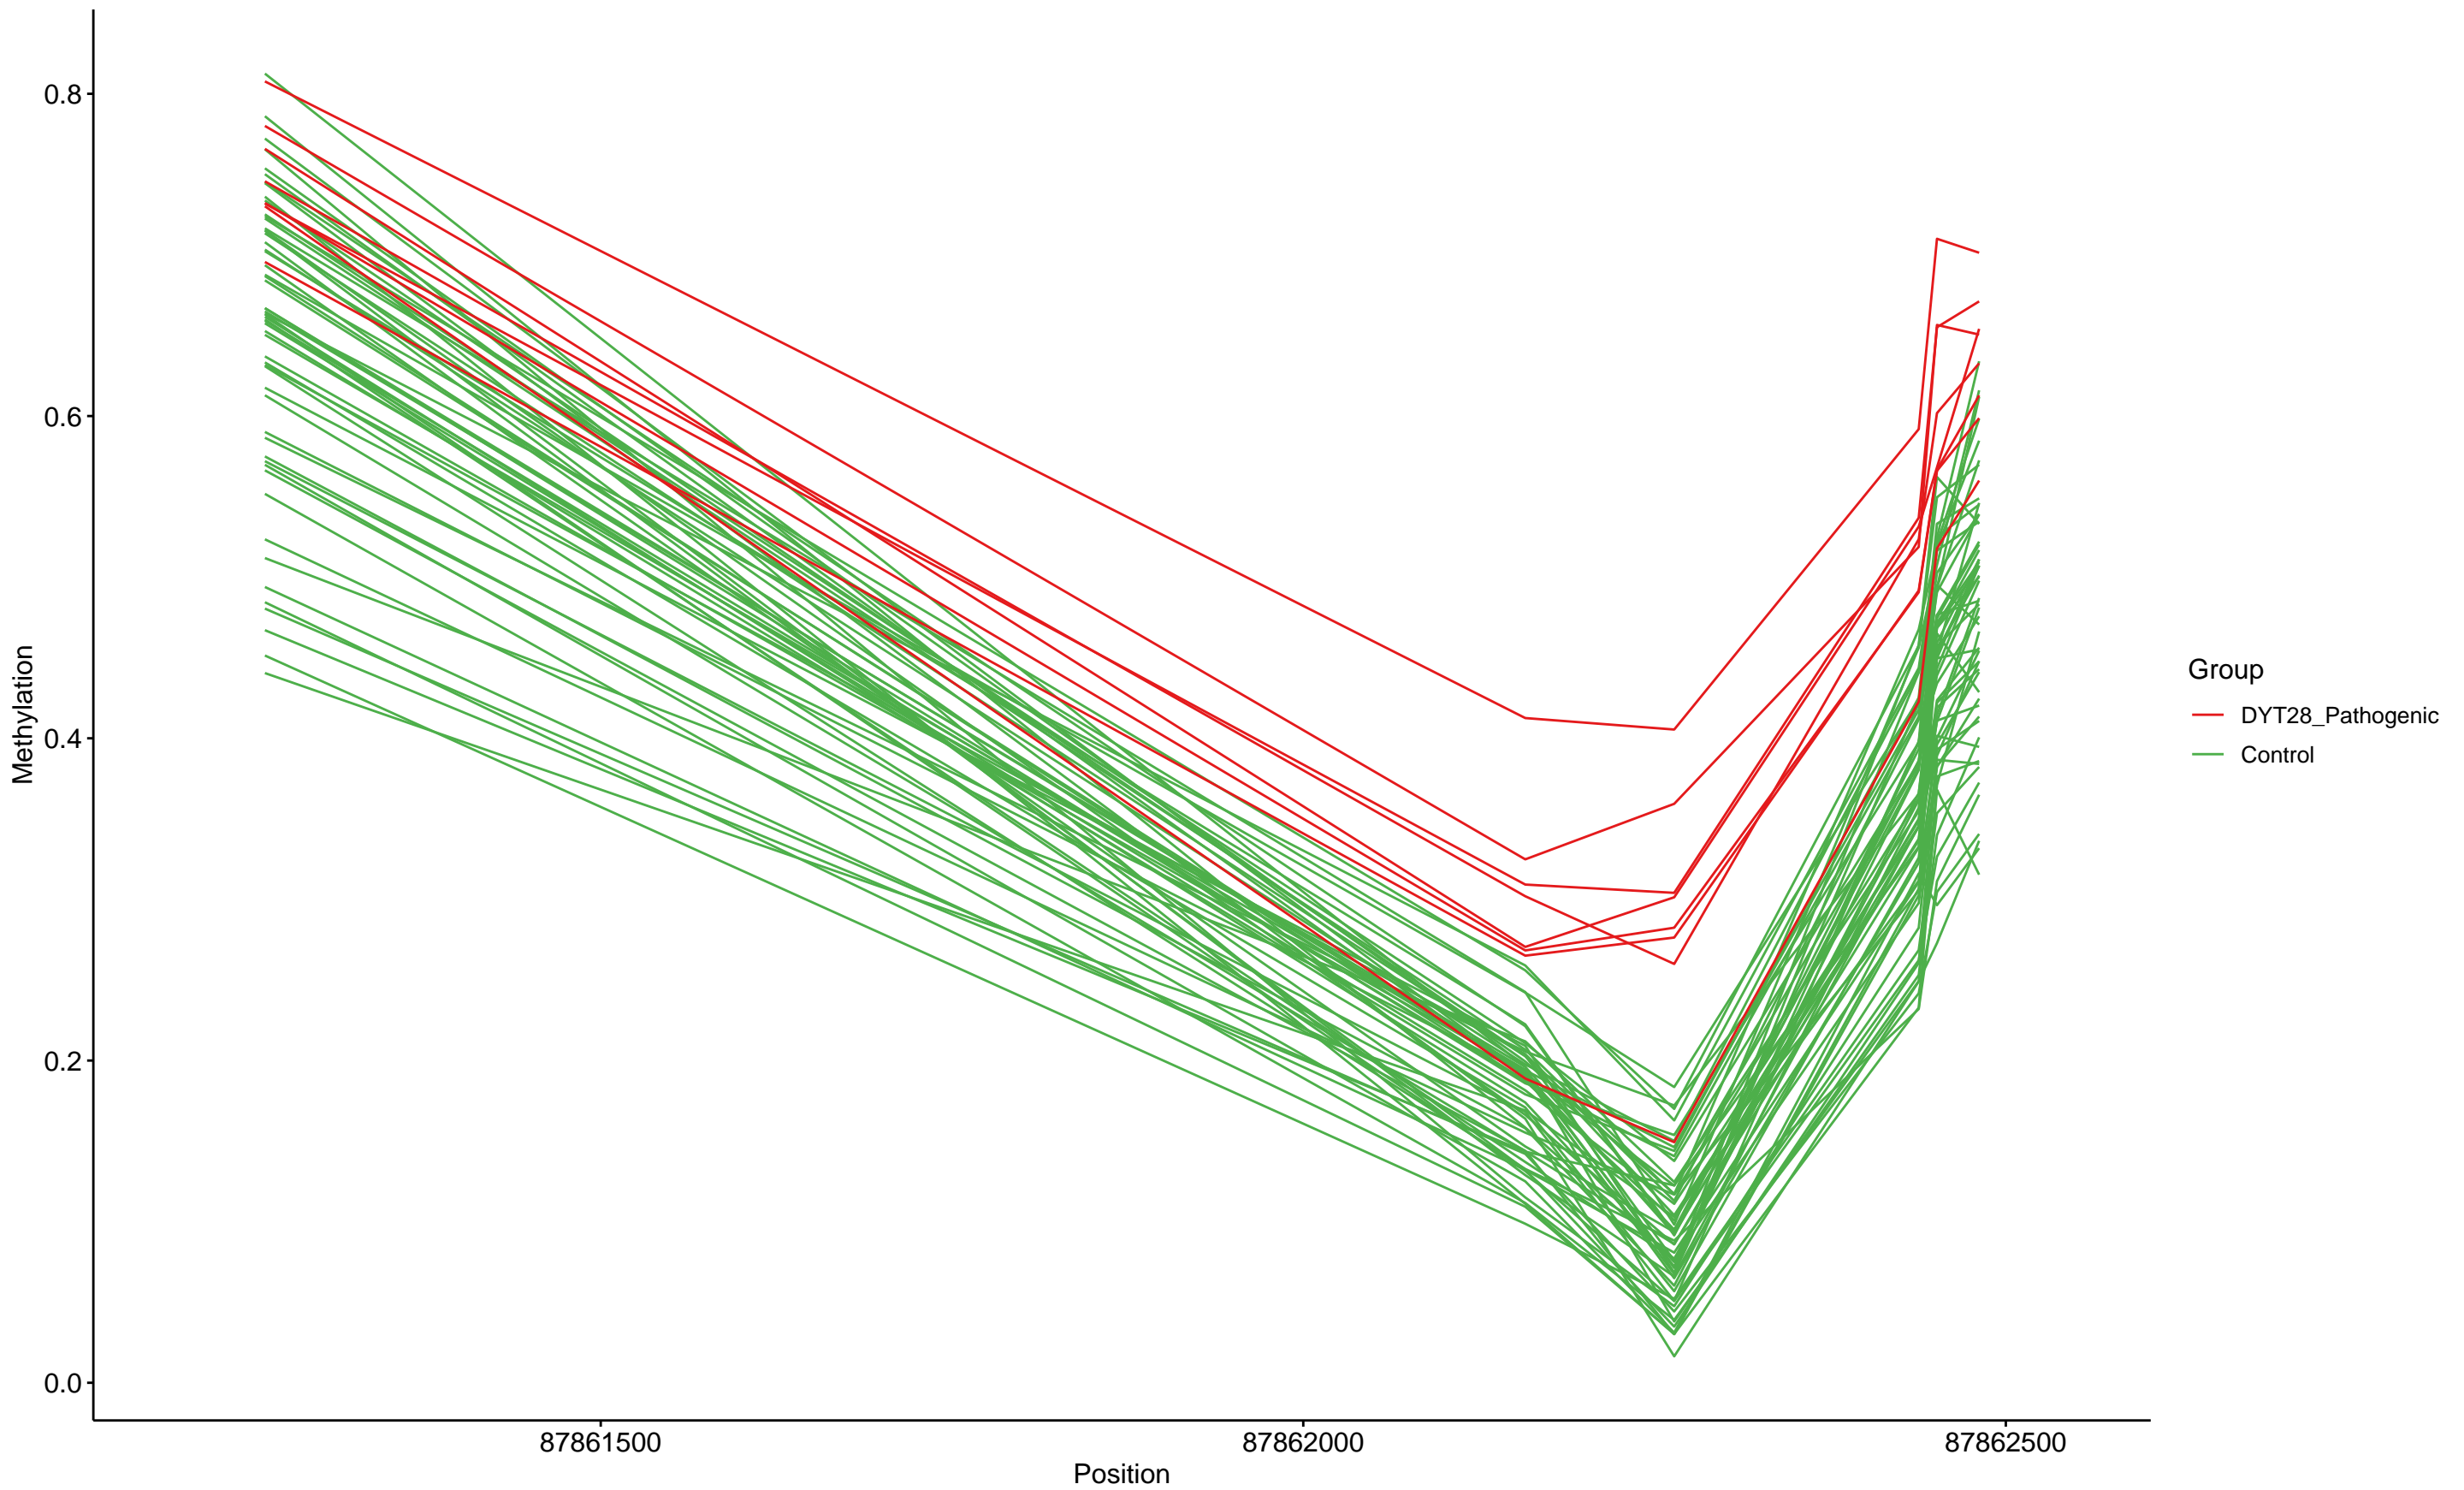



Region 104: chr22:32600722-32601654

Fisher: 1.92366457039346e-24

Stouffer: 1.60611377054073e-17

Mean difference: 0.132310659197222

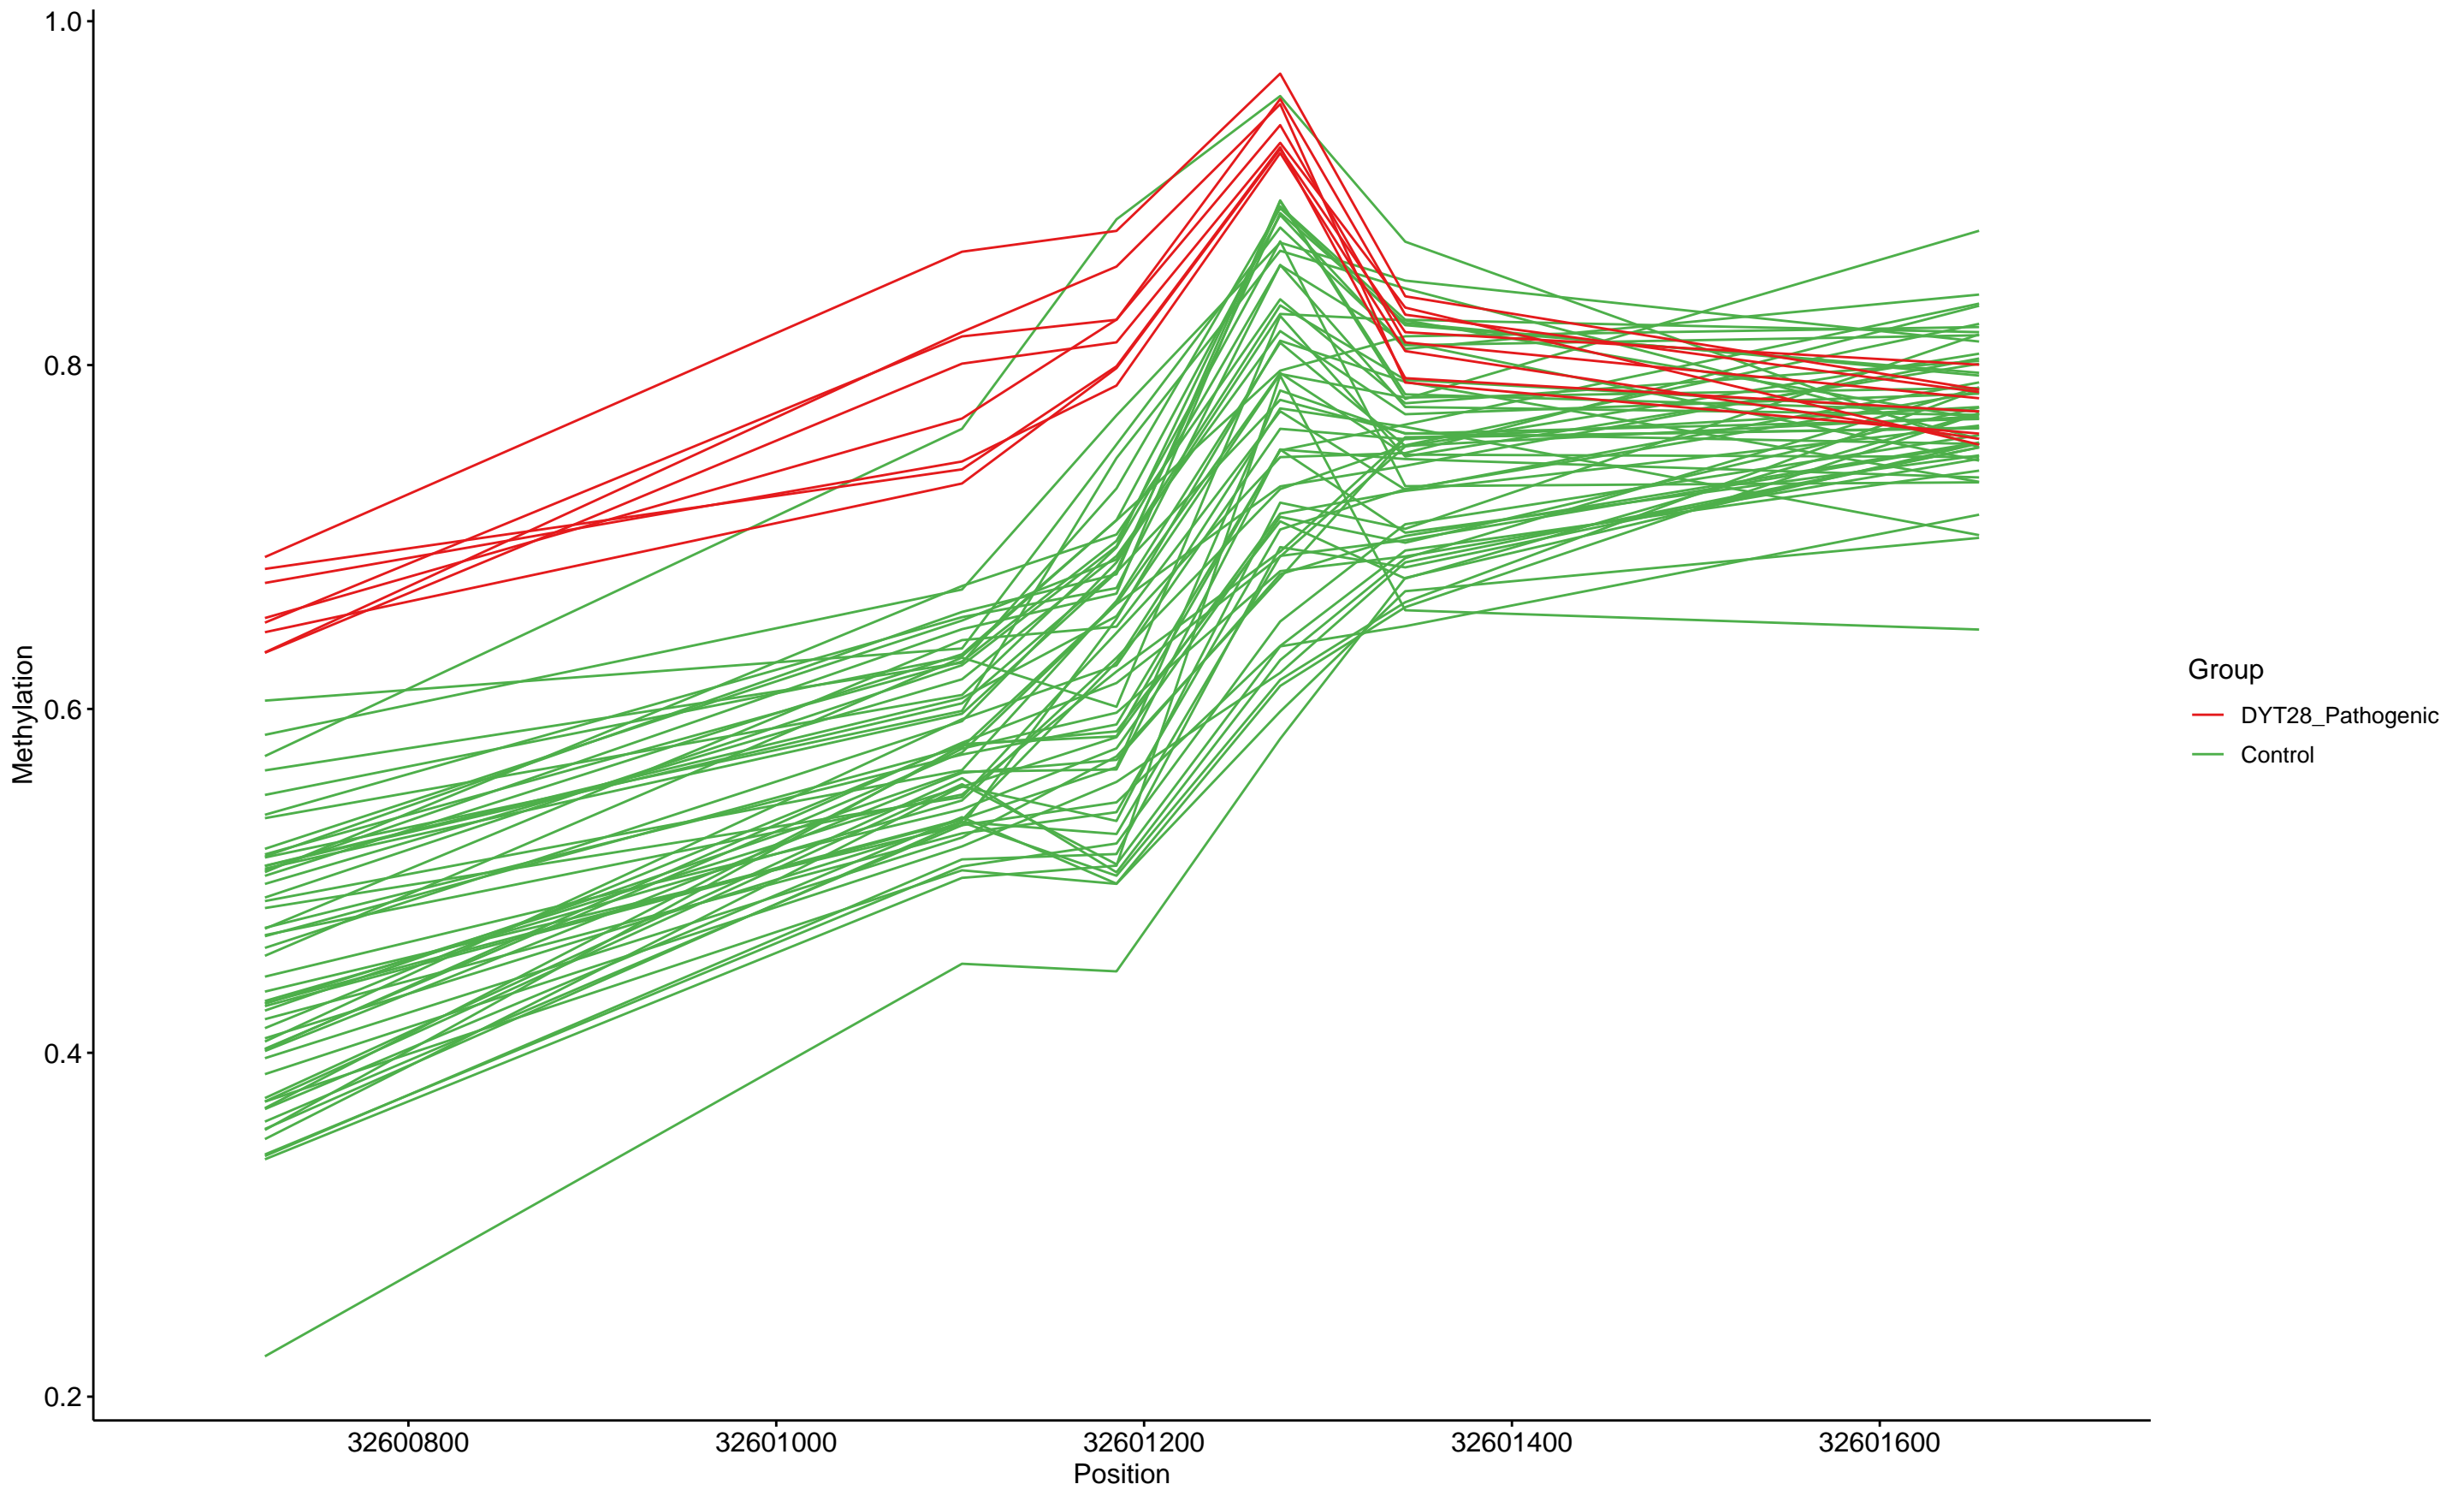



Region 105: chr13:23309689–23310675

Fisher: 2.75631670611363e-24

Stouffer: 2.07394068759088e-26

Mean difference: 0.12225298951792

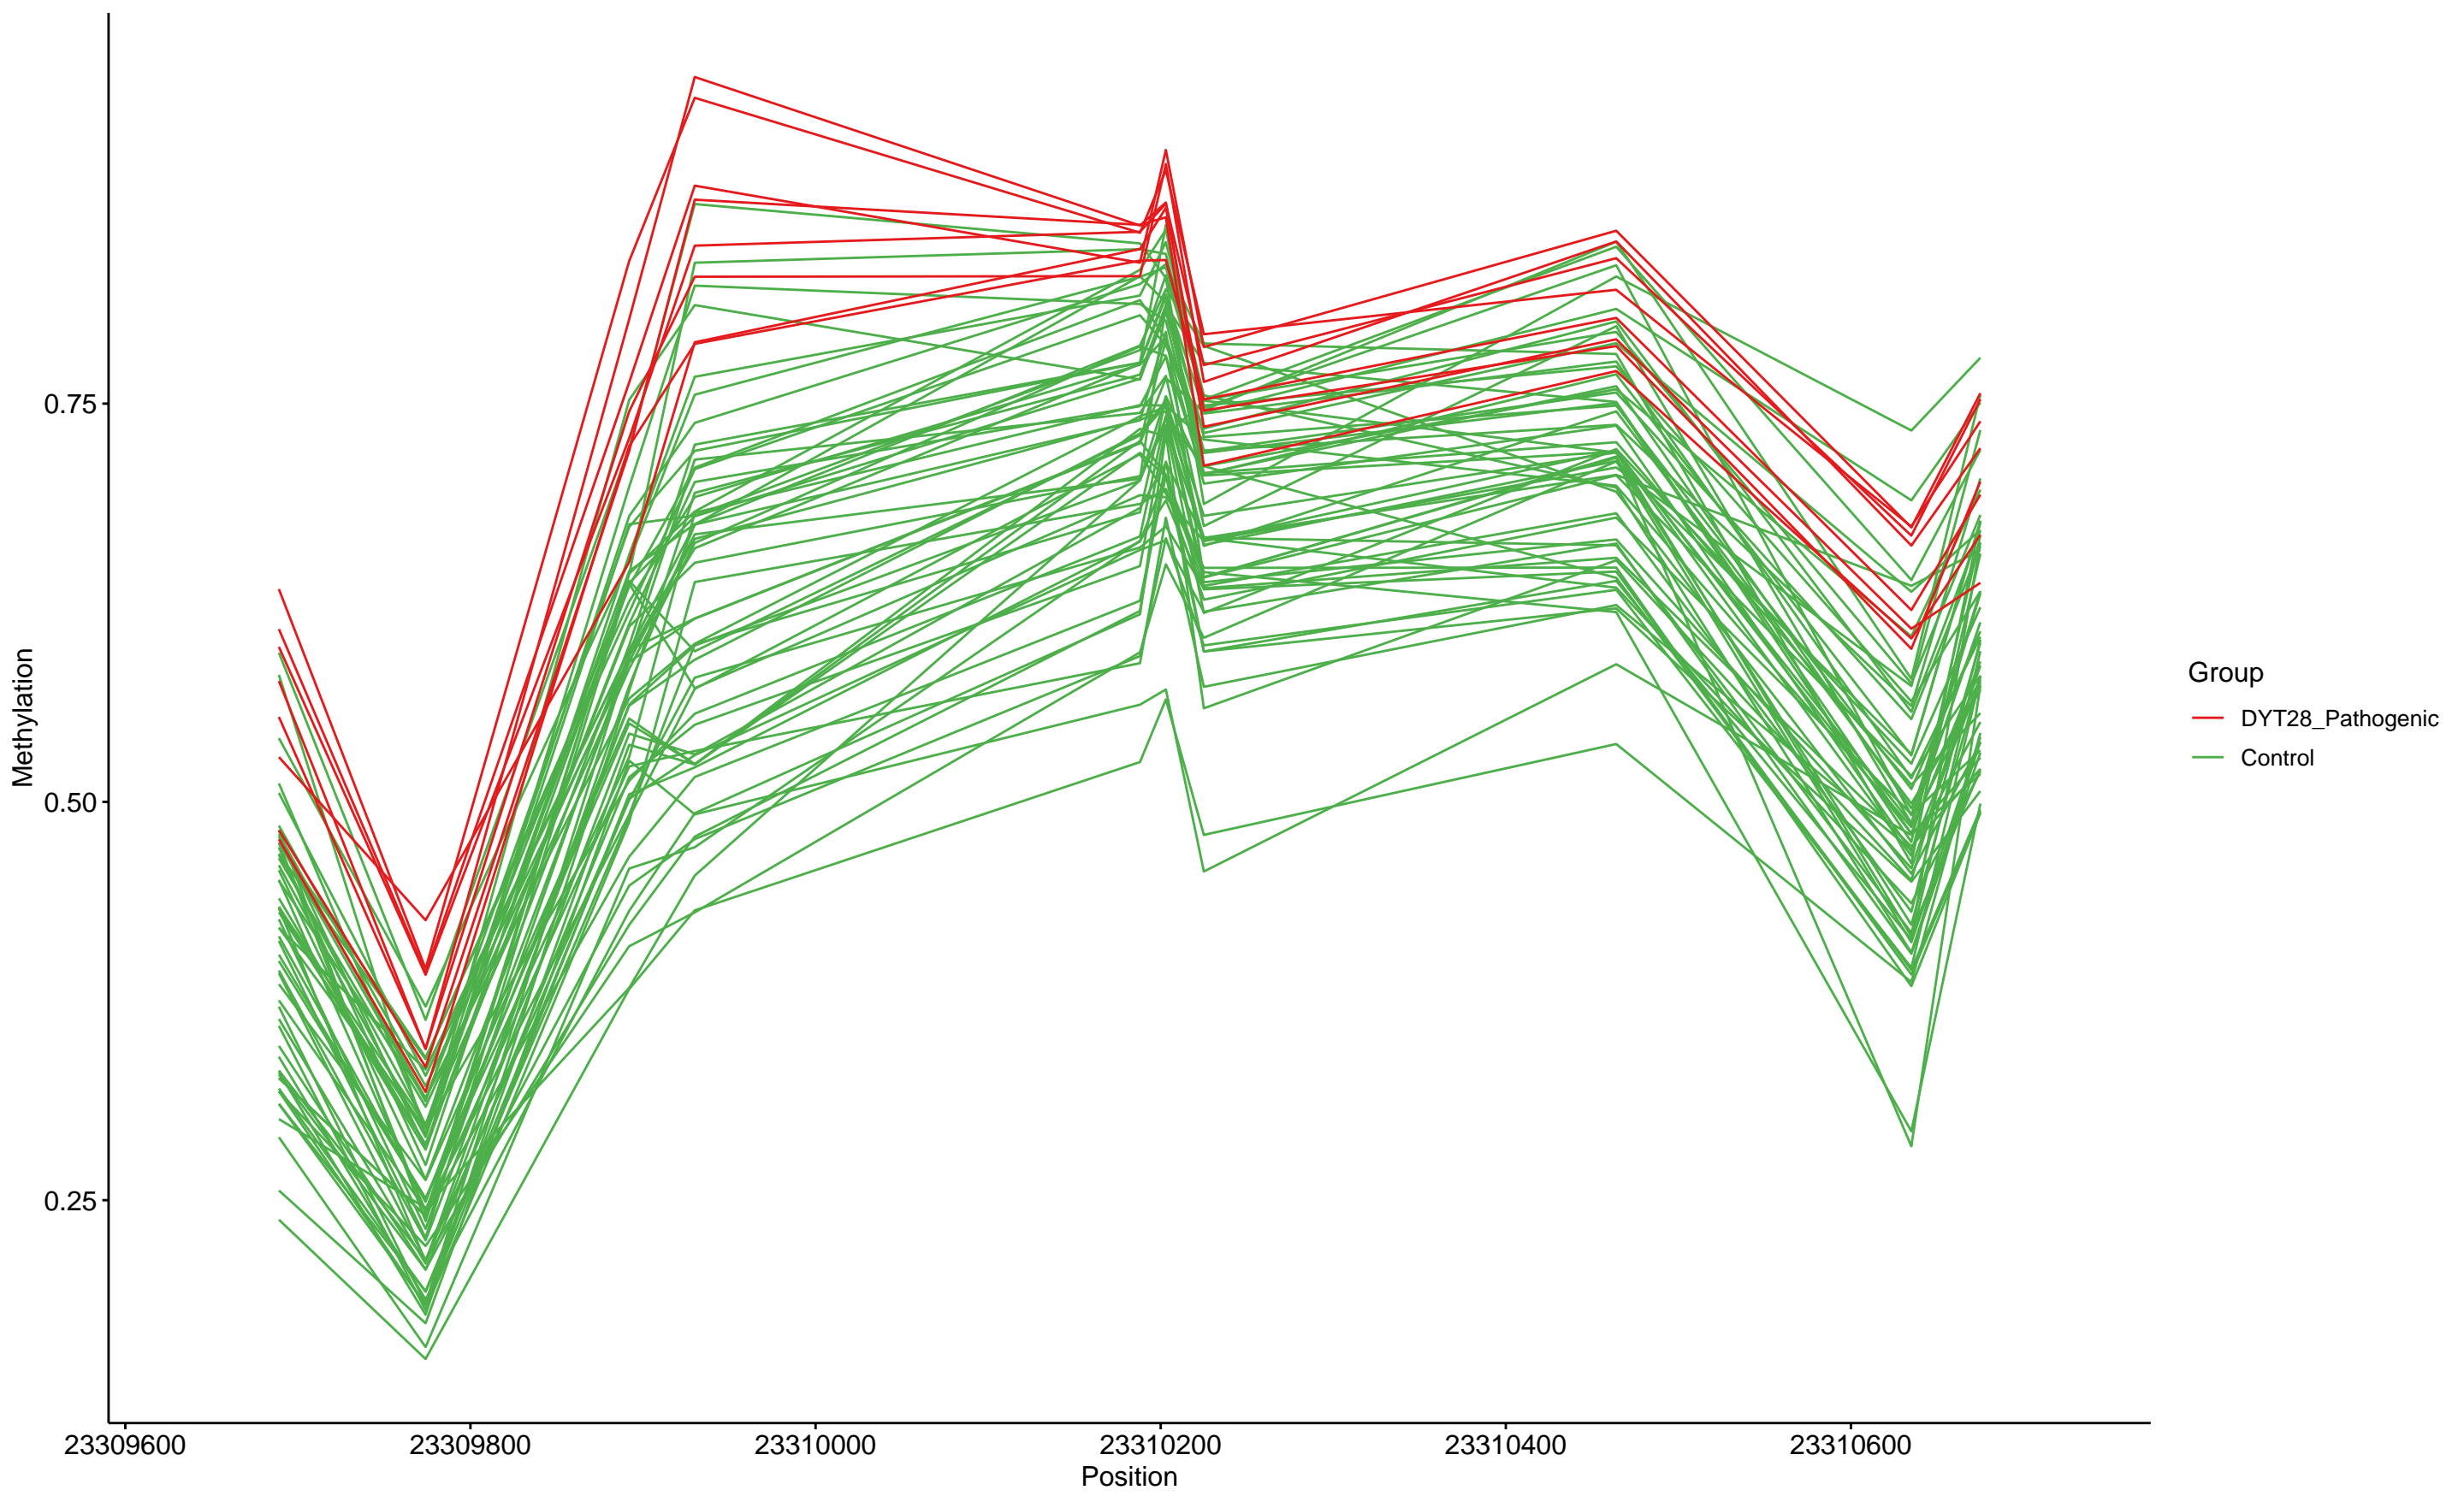

Region 106: chr7:23245562-23246922

Fisher: 6.15821545041504e-24

Stouffer: 6.17478521717979e-24

Mean difference: 0.177935504096031

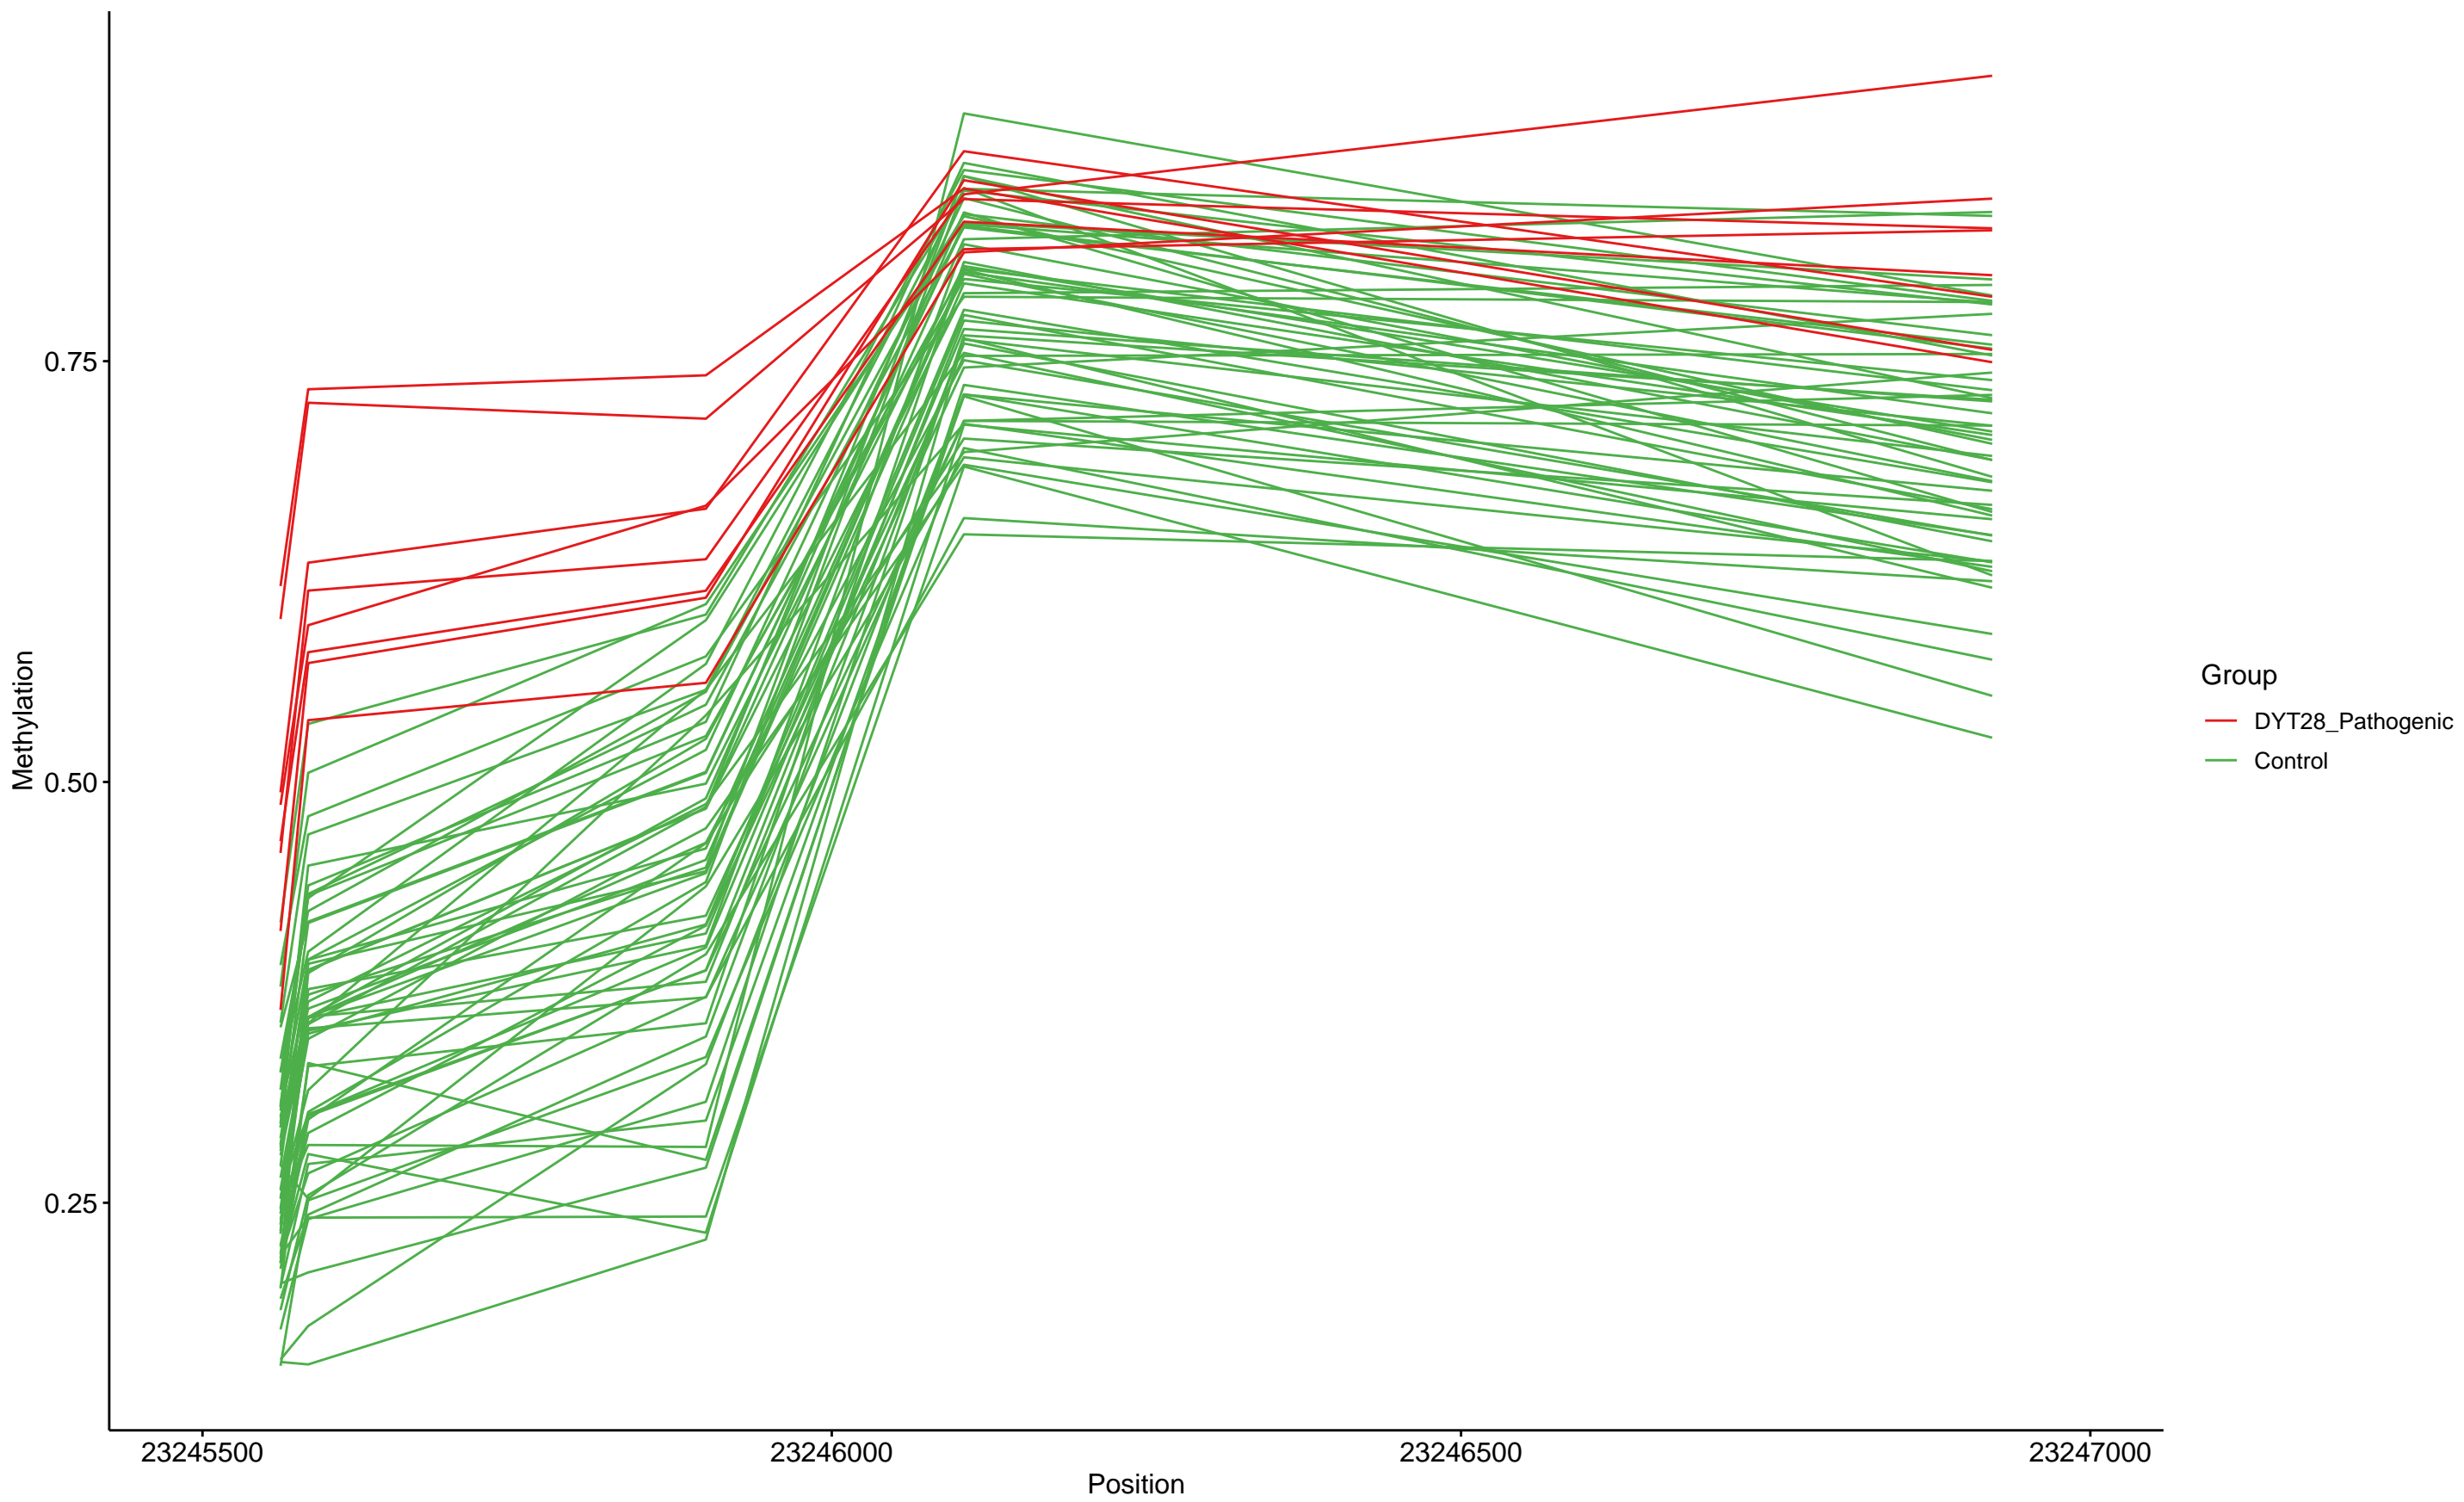

Region 107: chr8:96084821-96085994

Fisher: 1.56959552435035e-23

Stouffer: 1.68527983937722e-22

Mean difference: 0.133361242385734

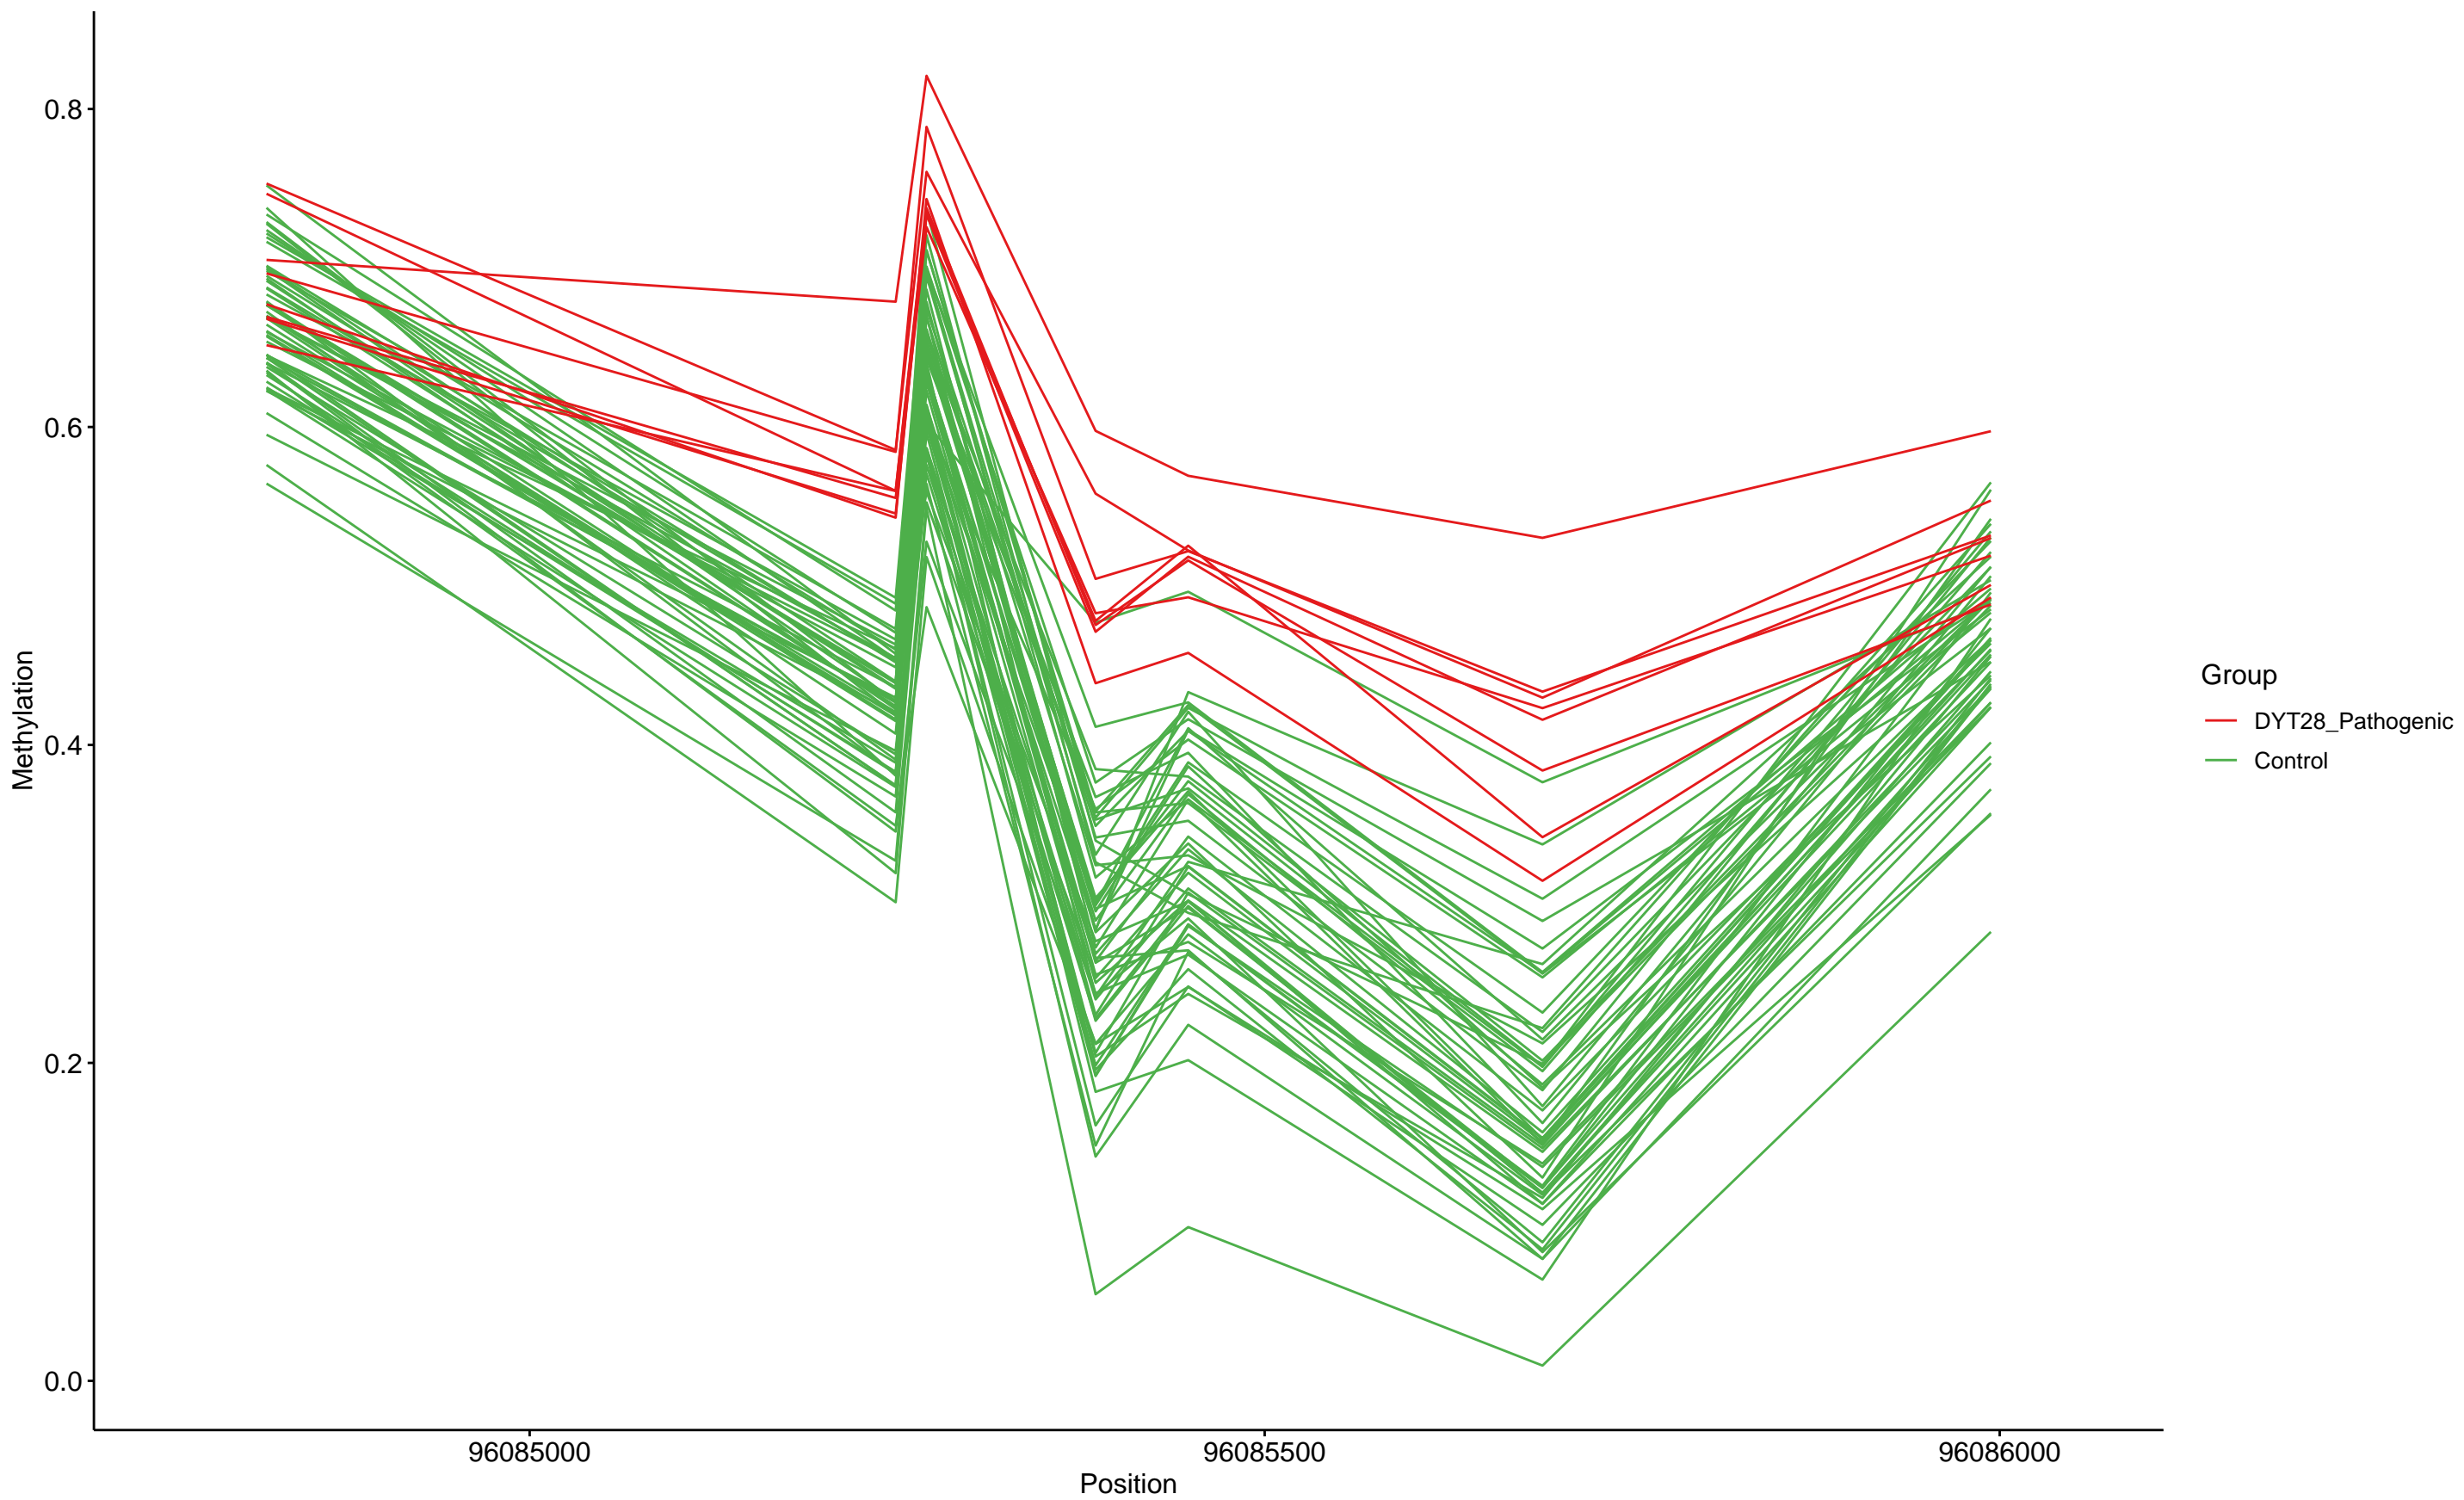



Region 108: chr7:152622022-152623304

Fisher: 1.83807346540876e-23

Stouffer: 1.56641654606548e-24

Mean difference: 0.129229752880561

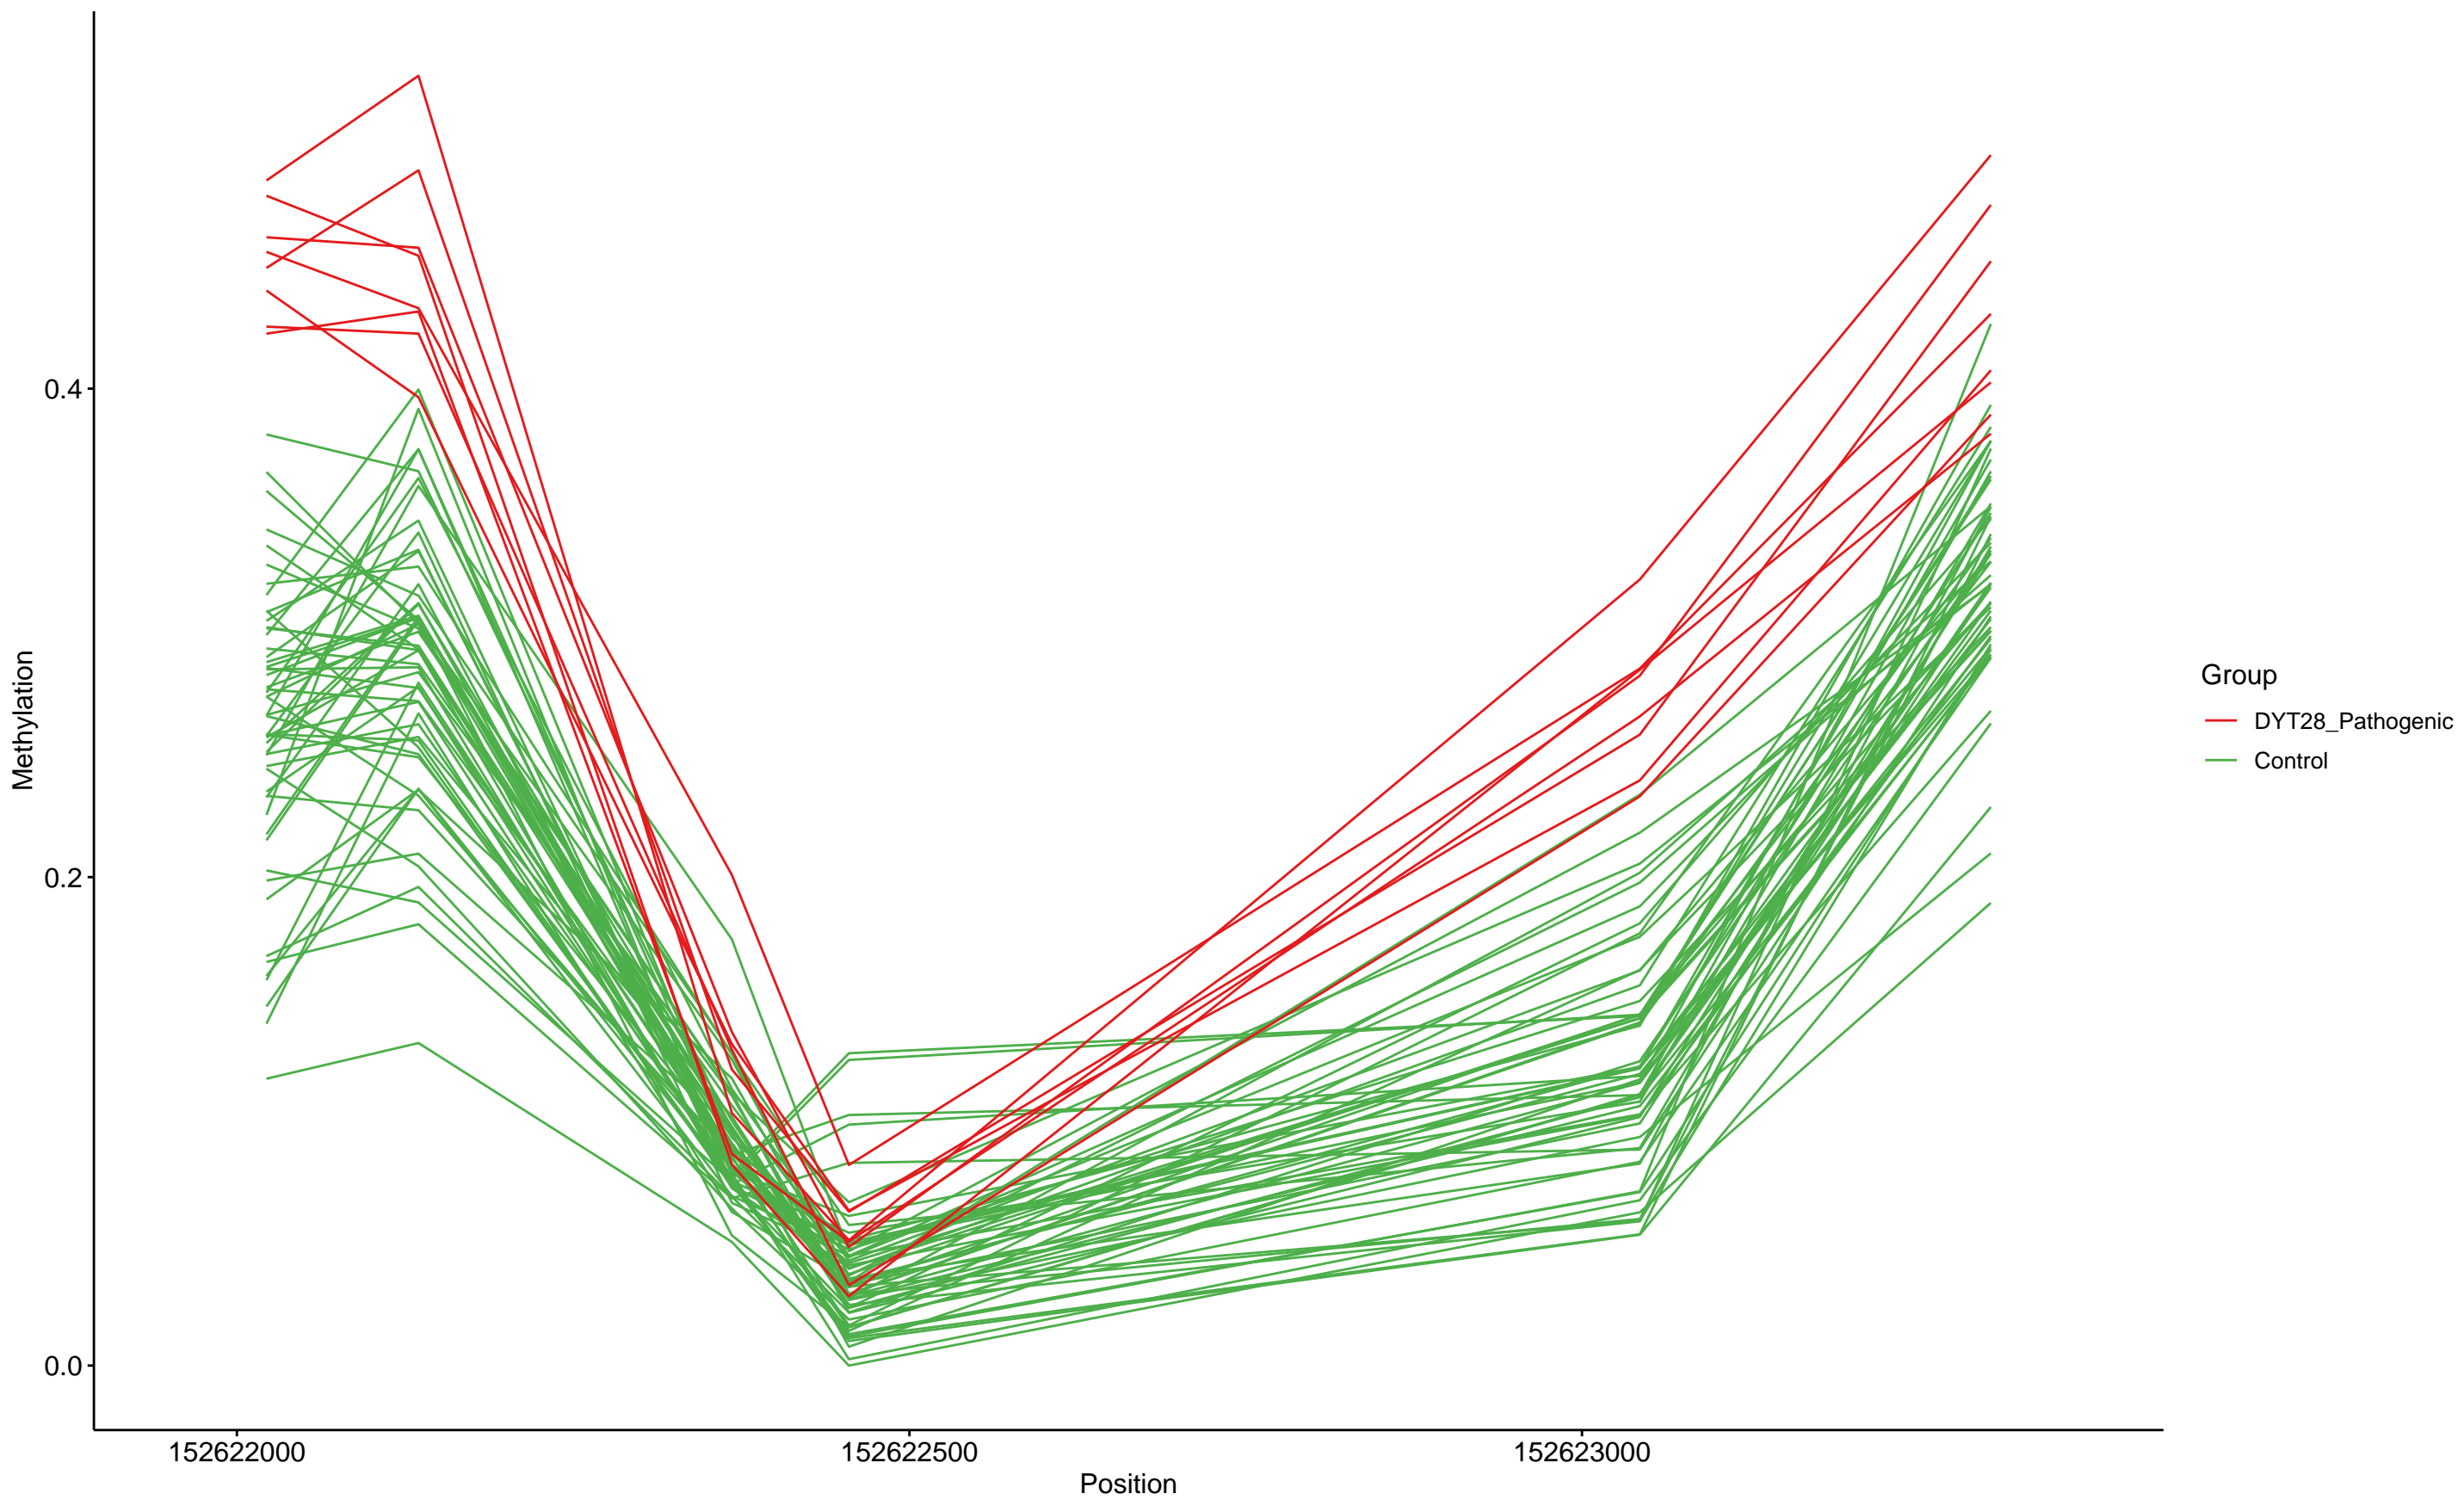



Region 109: chr9:74061449-74062096

Fisher:  $7.82067277124014e-23$

Stouffer:  $2.45339900956779e-24$

Mean difference: 0.101724746565986

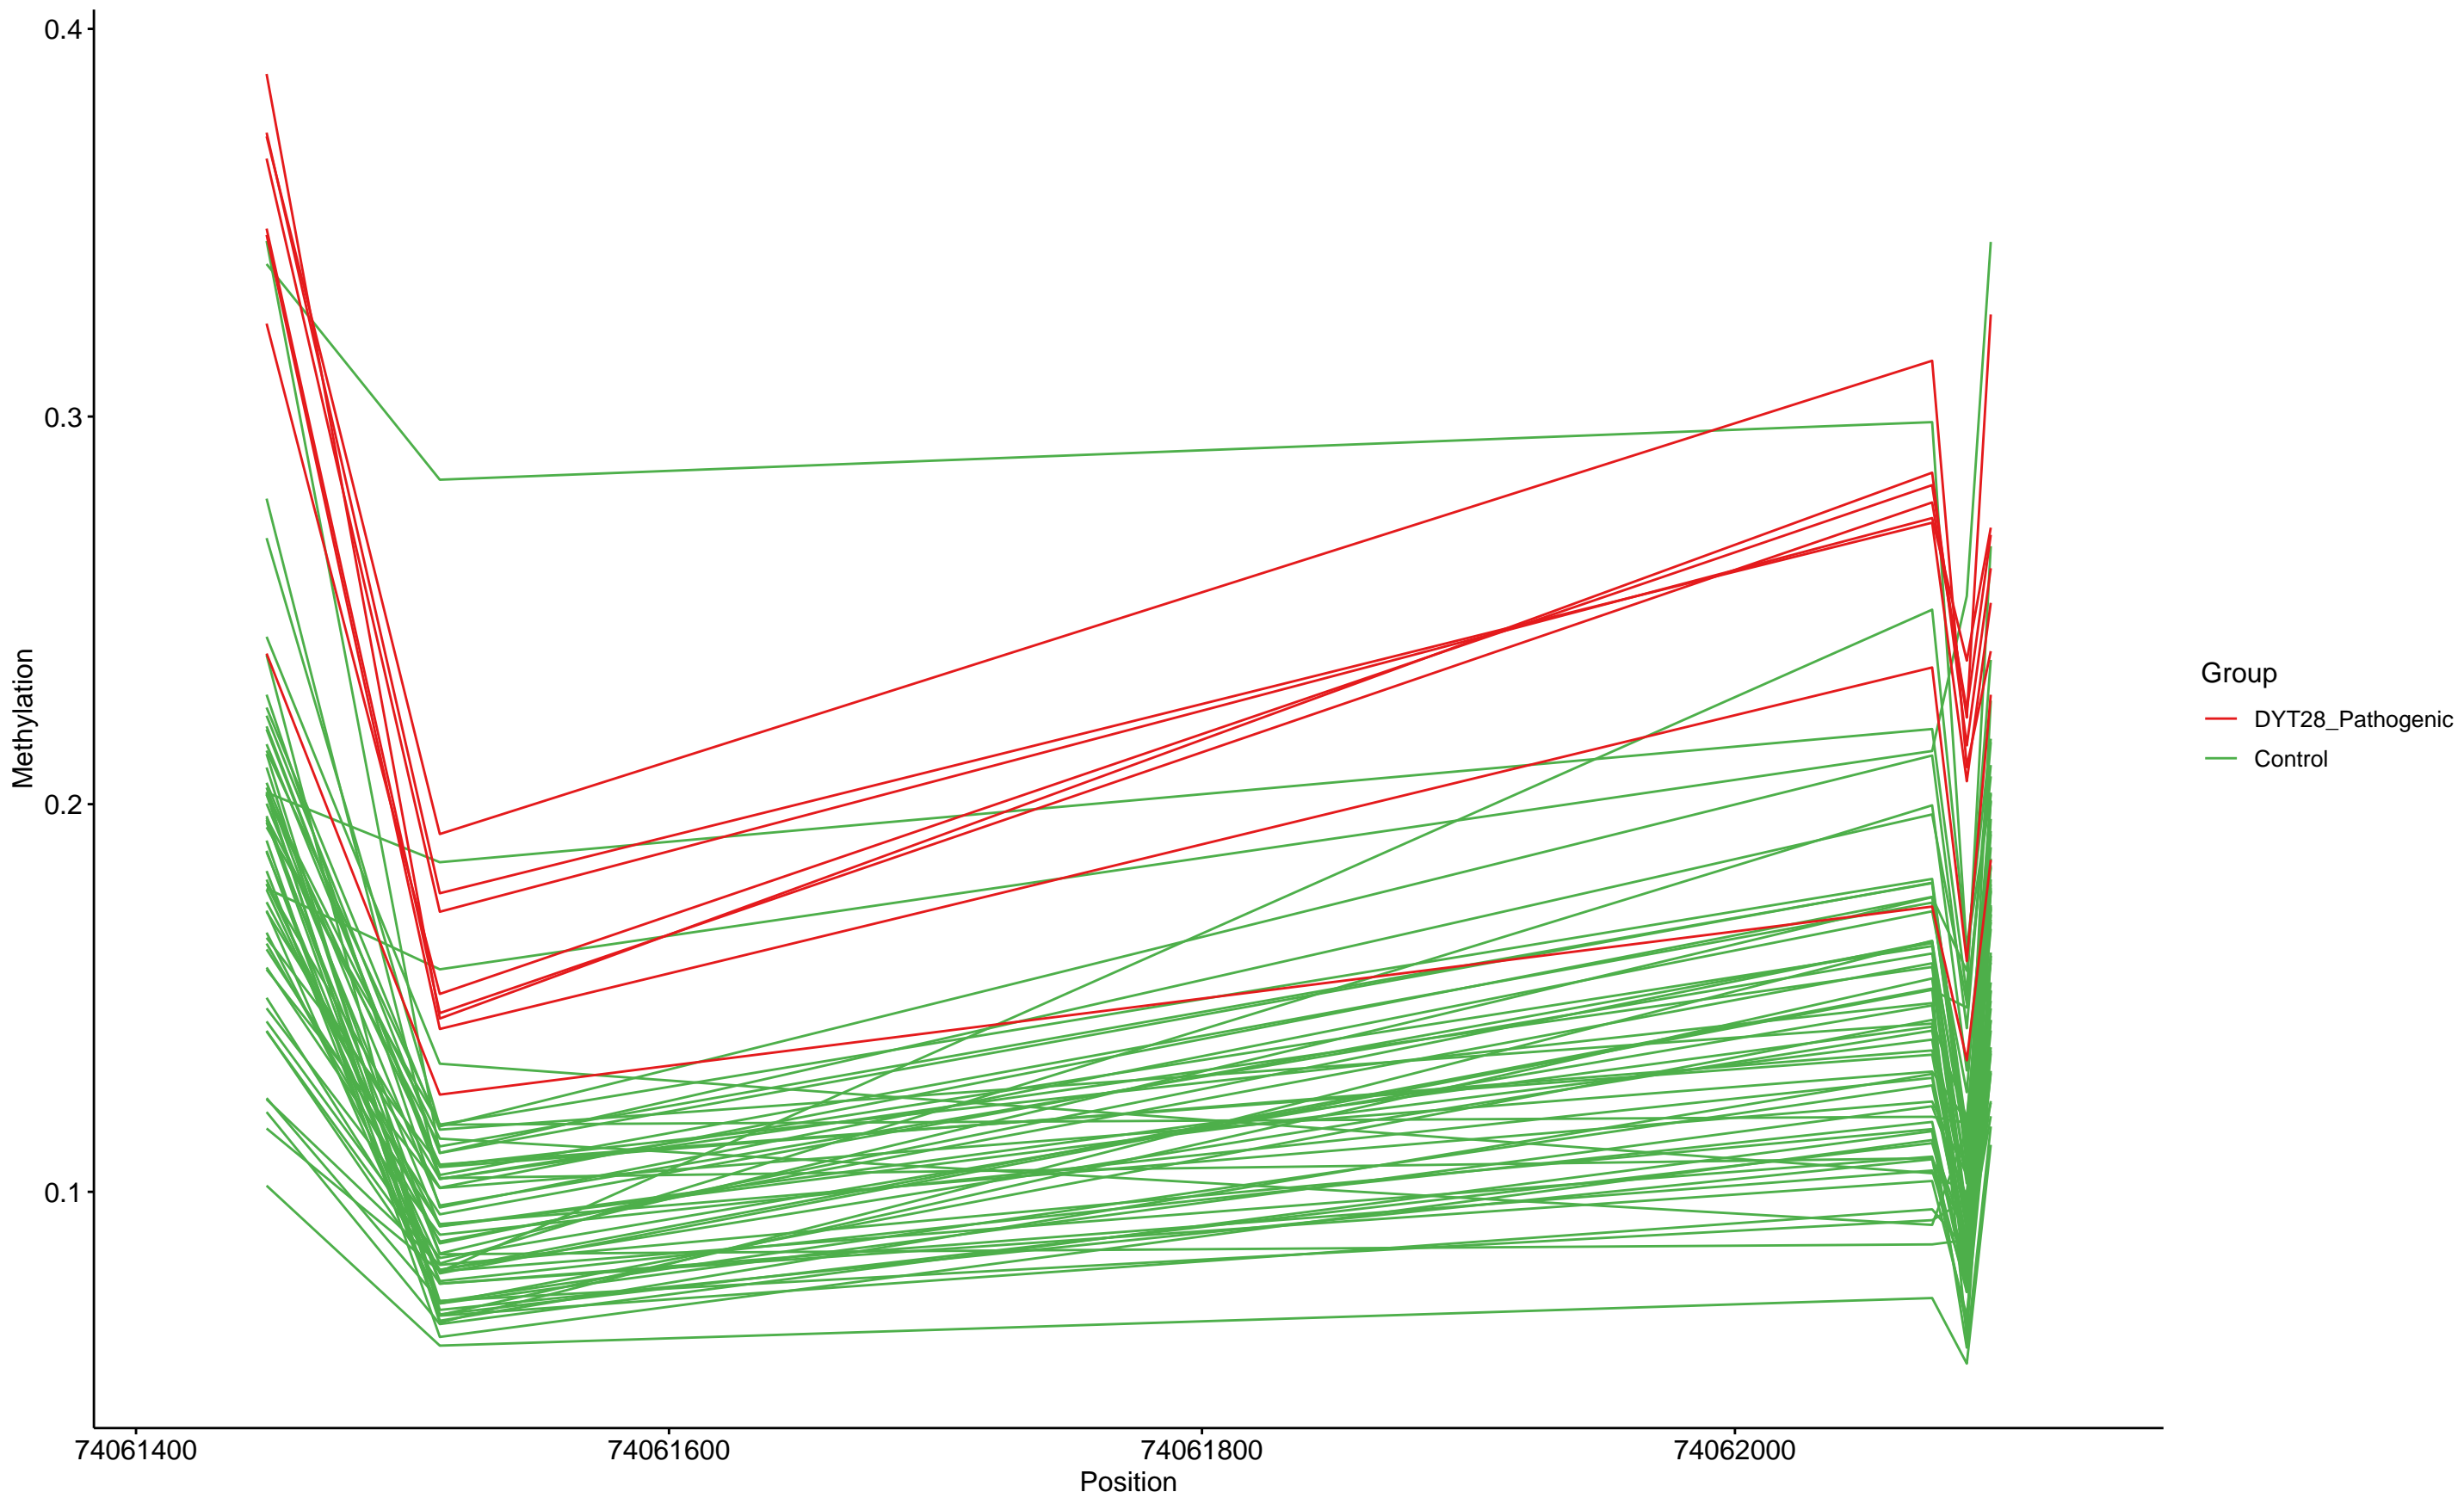

Region 110: chr8:43131431-43132451

Fisher: 8.34666706346606e-23

Stouffer: 3.55661363258531e-24

Mean difference: 0.155930202519552

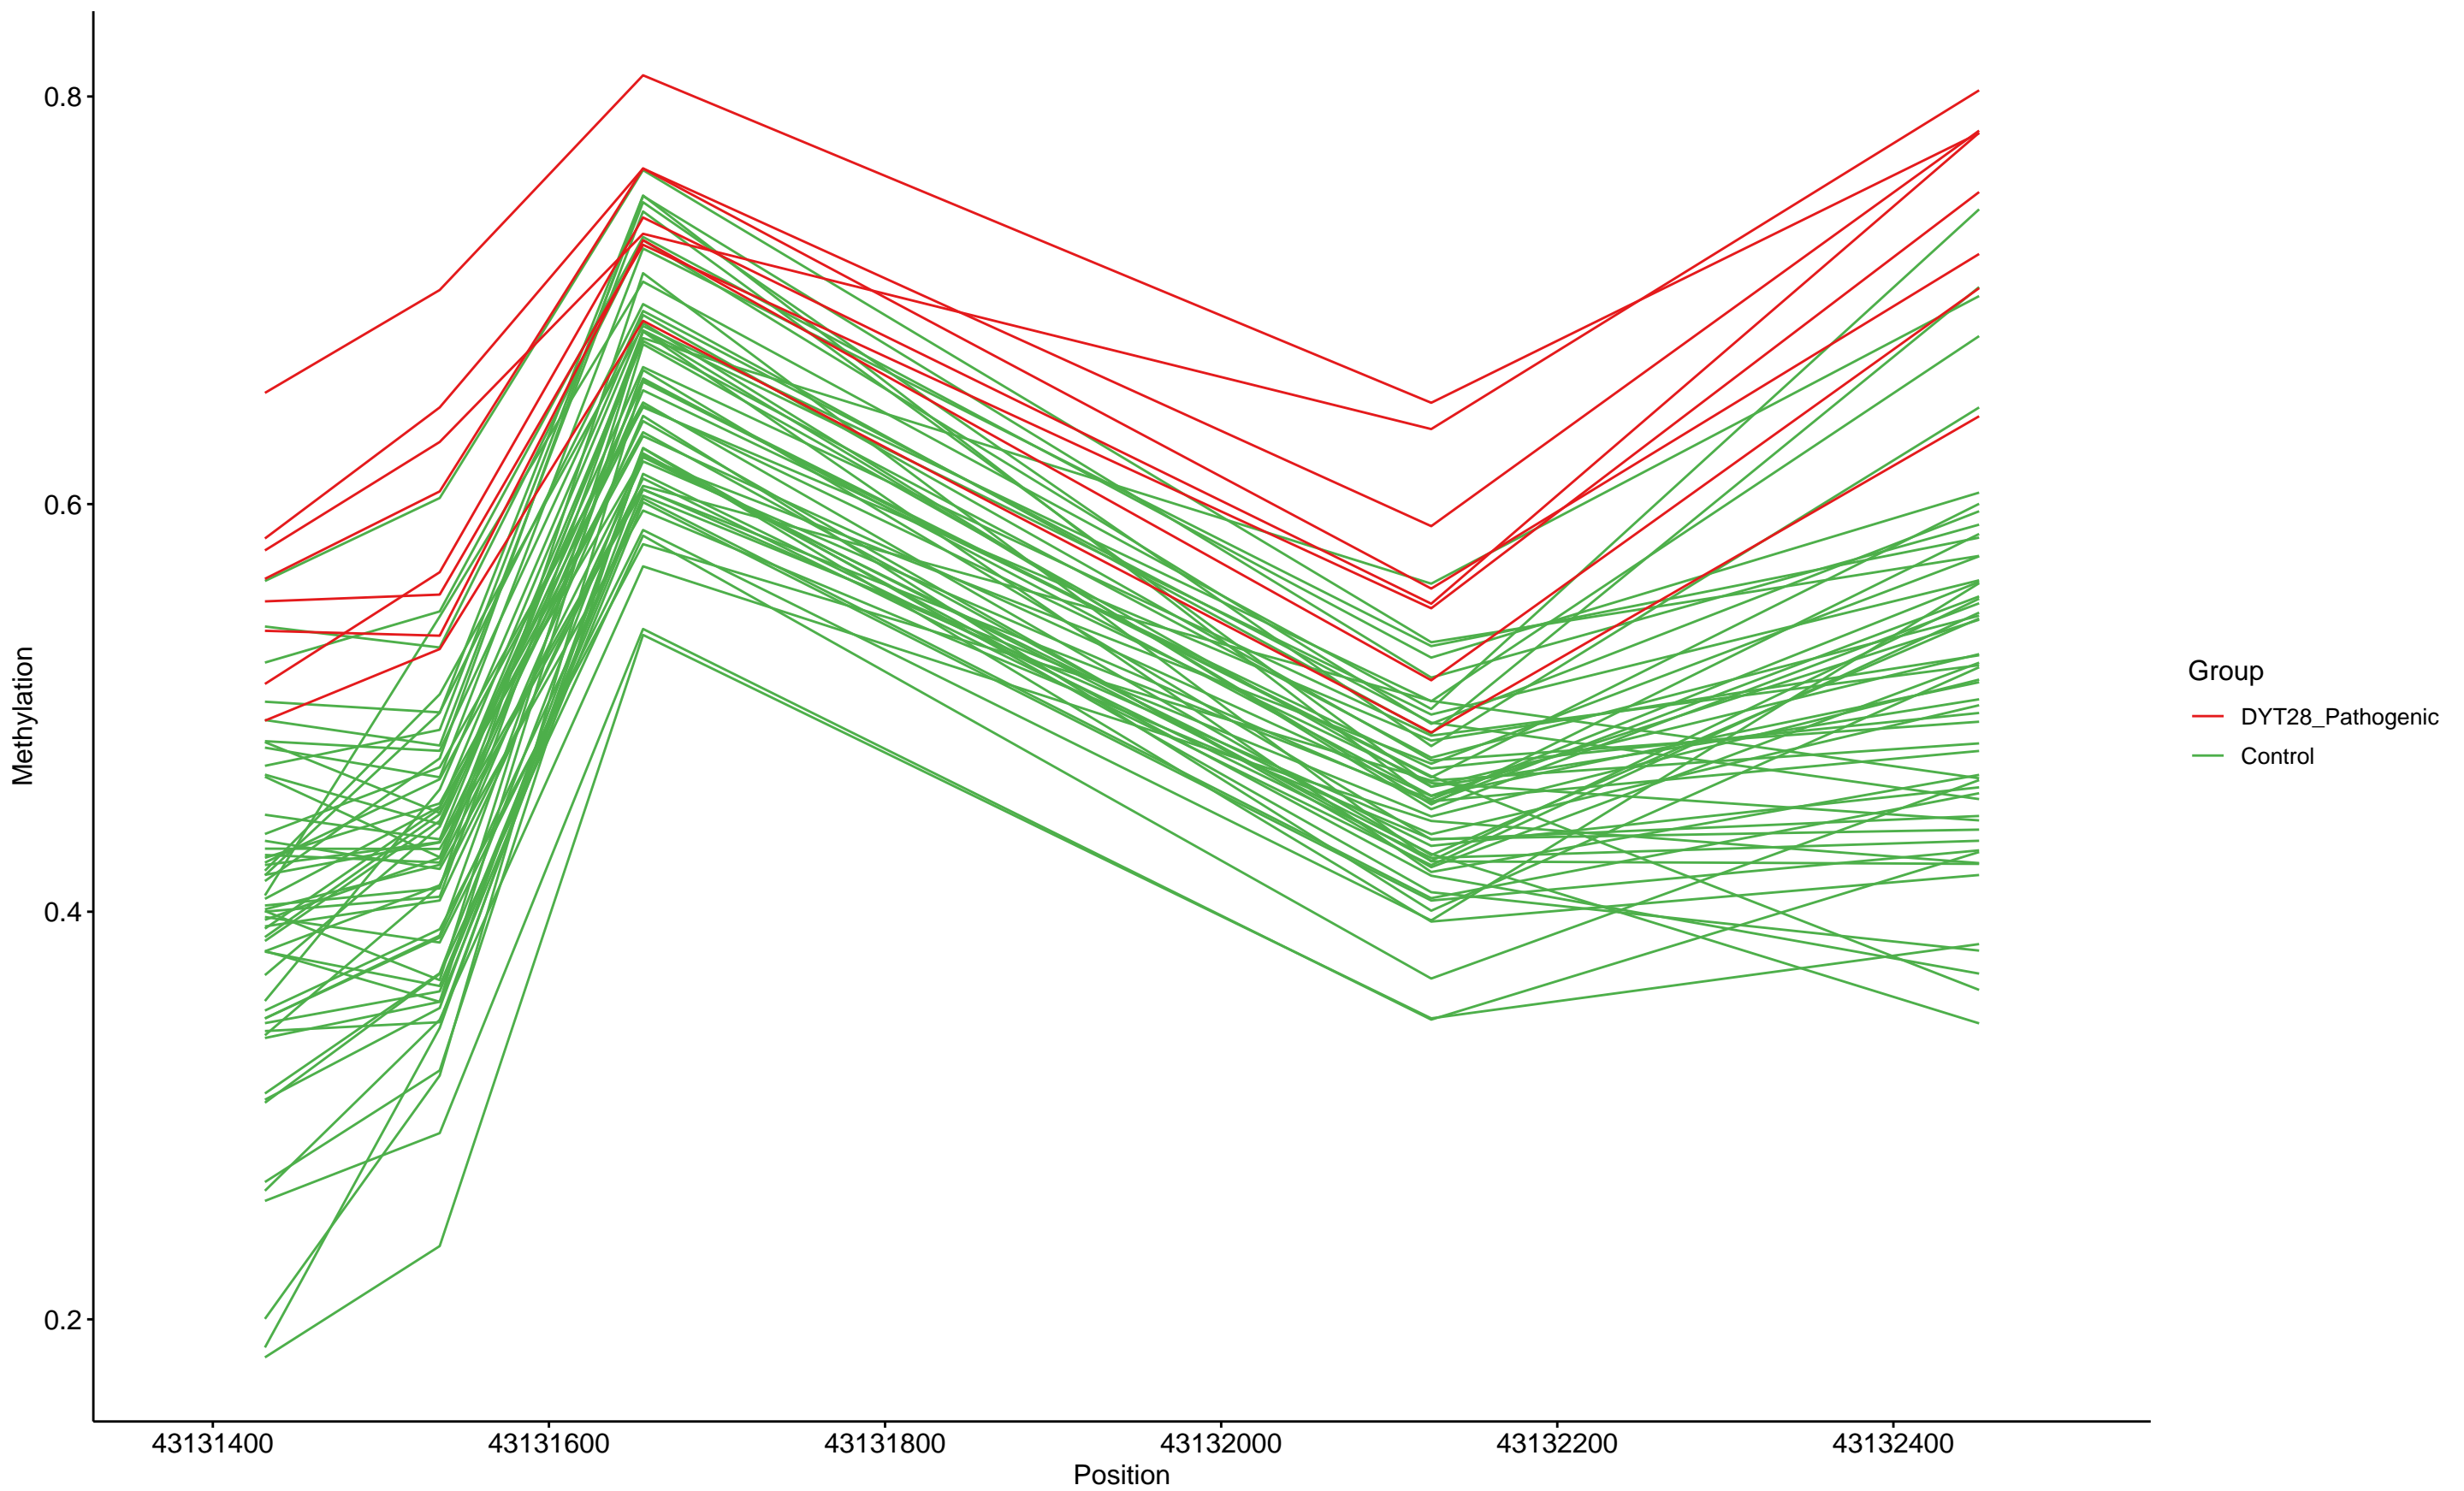

Region 111: chr2:112895559–112896214

Fisher: 1.83763229511784e-22

Stouffer: 2.98207247582058e-21

Mean difference: 0.103063111380722

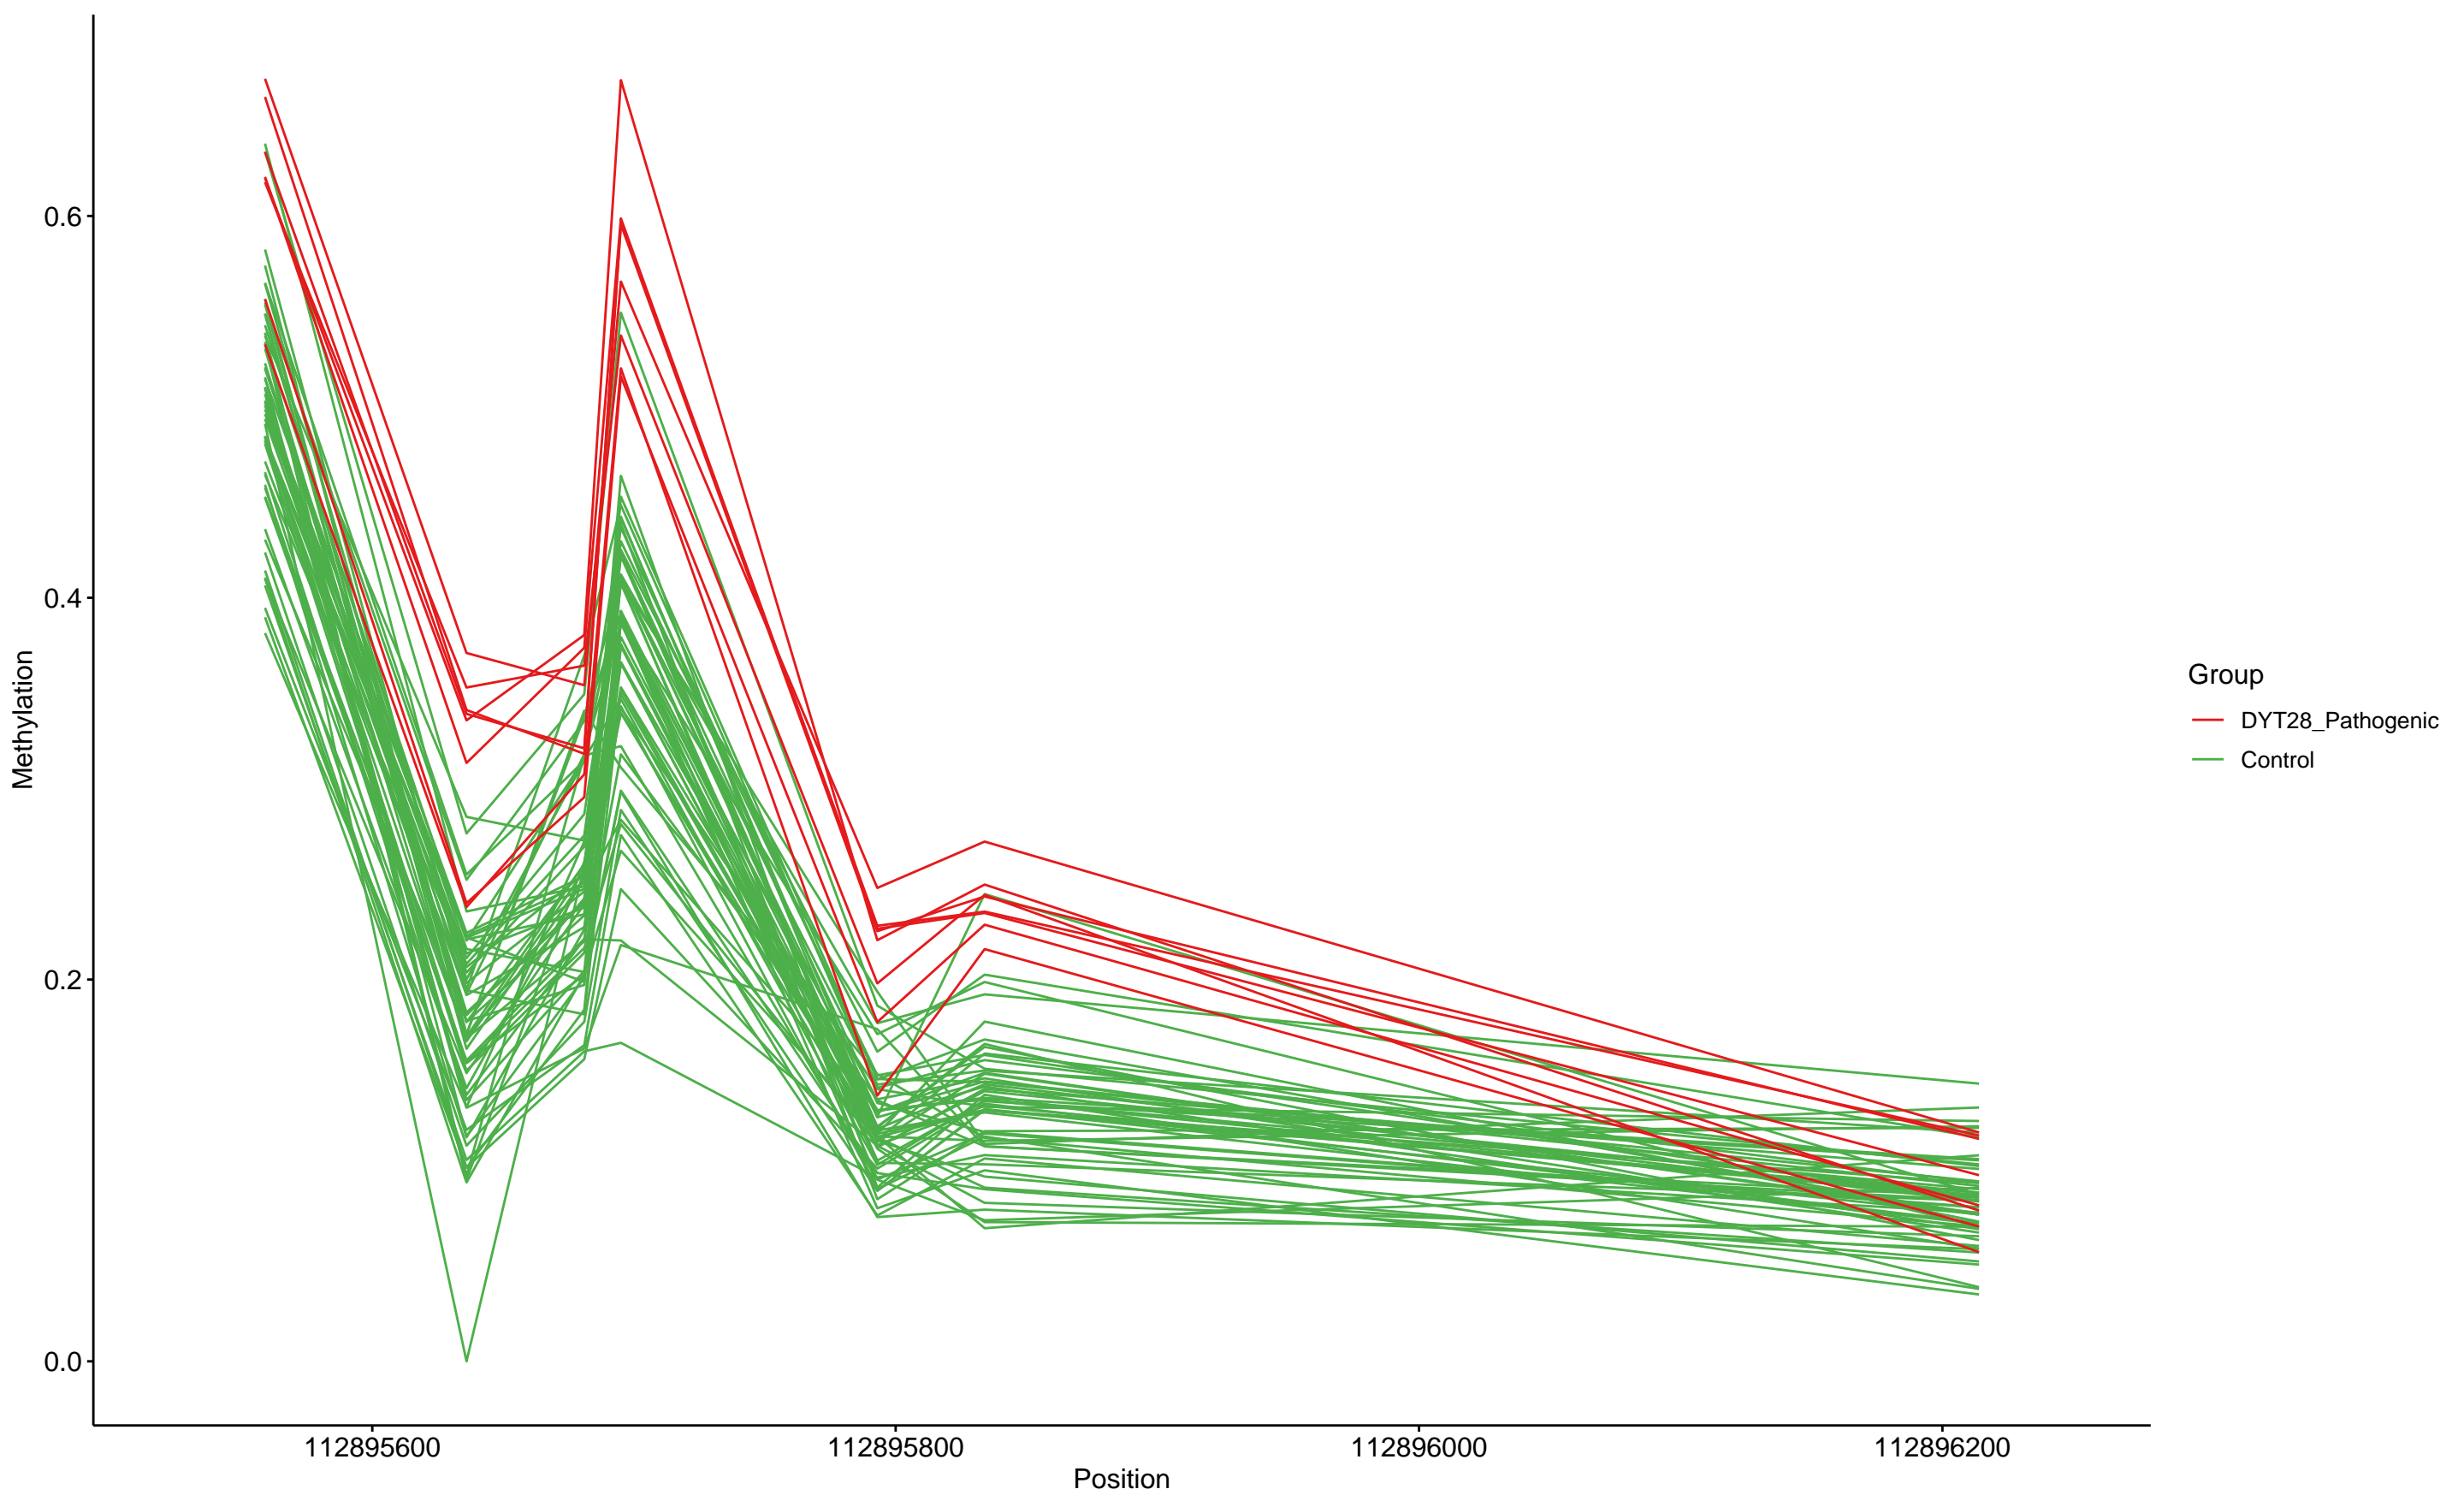



Region 112: chr1:6514605–6516324

Fisher:  $2.13782421352933e-22$

Stouffer:  $8.84456881592138e-24$

Mean difference: 0.136614331707942

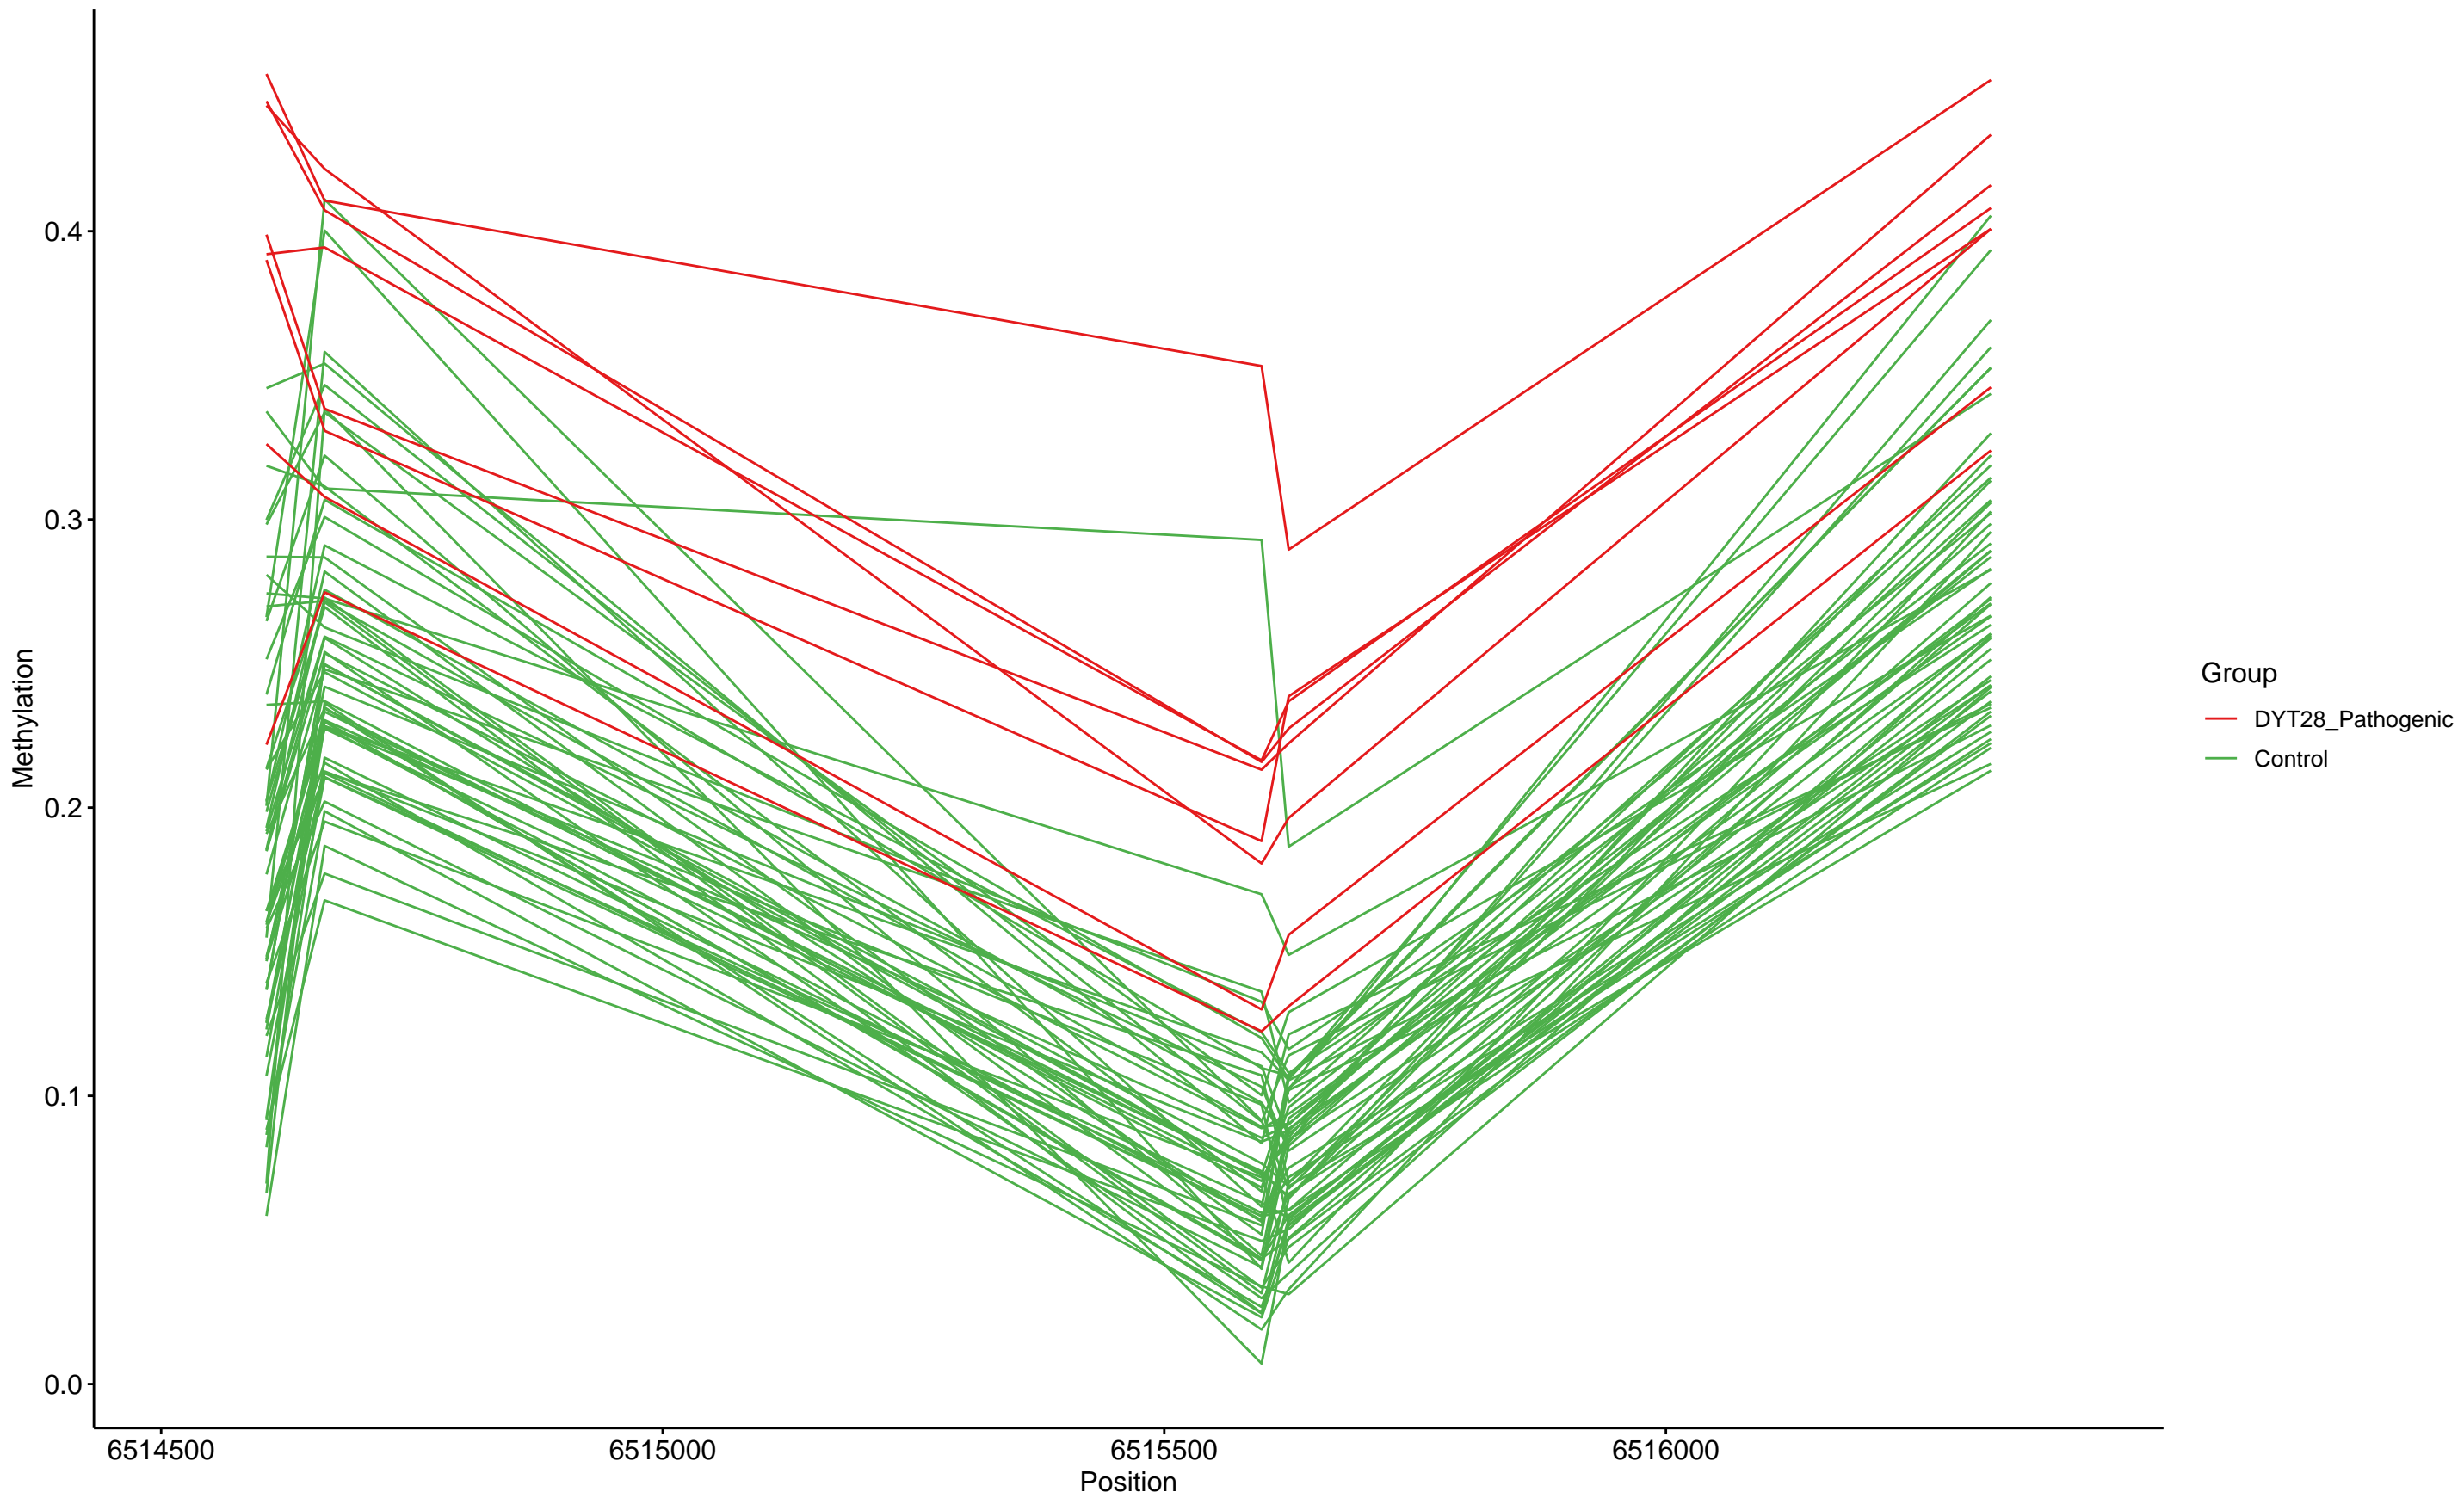



Region 113: chr17:171109640–171110641

Fisher: 2.1656010989696e-22

Stouffer: 5.75452334157866e-16

Mean difference: 0.106976011011533

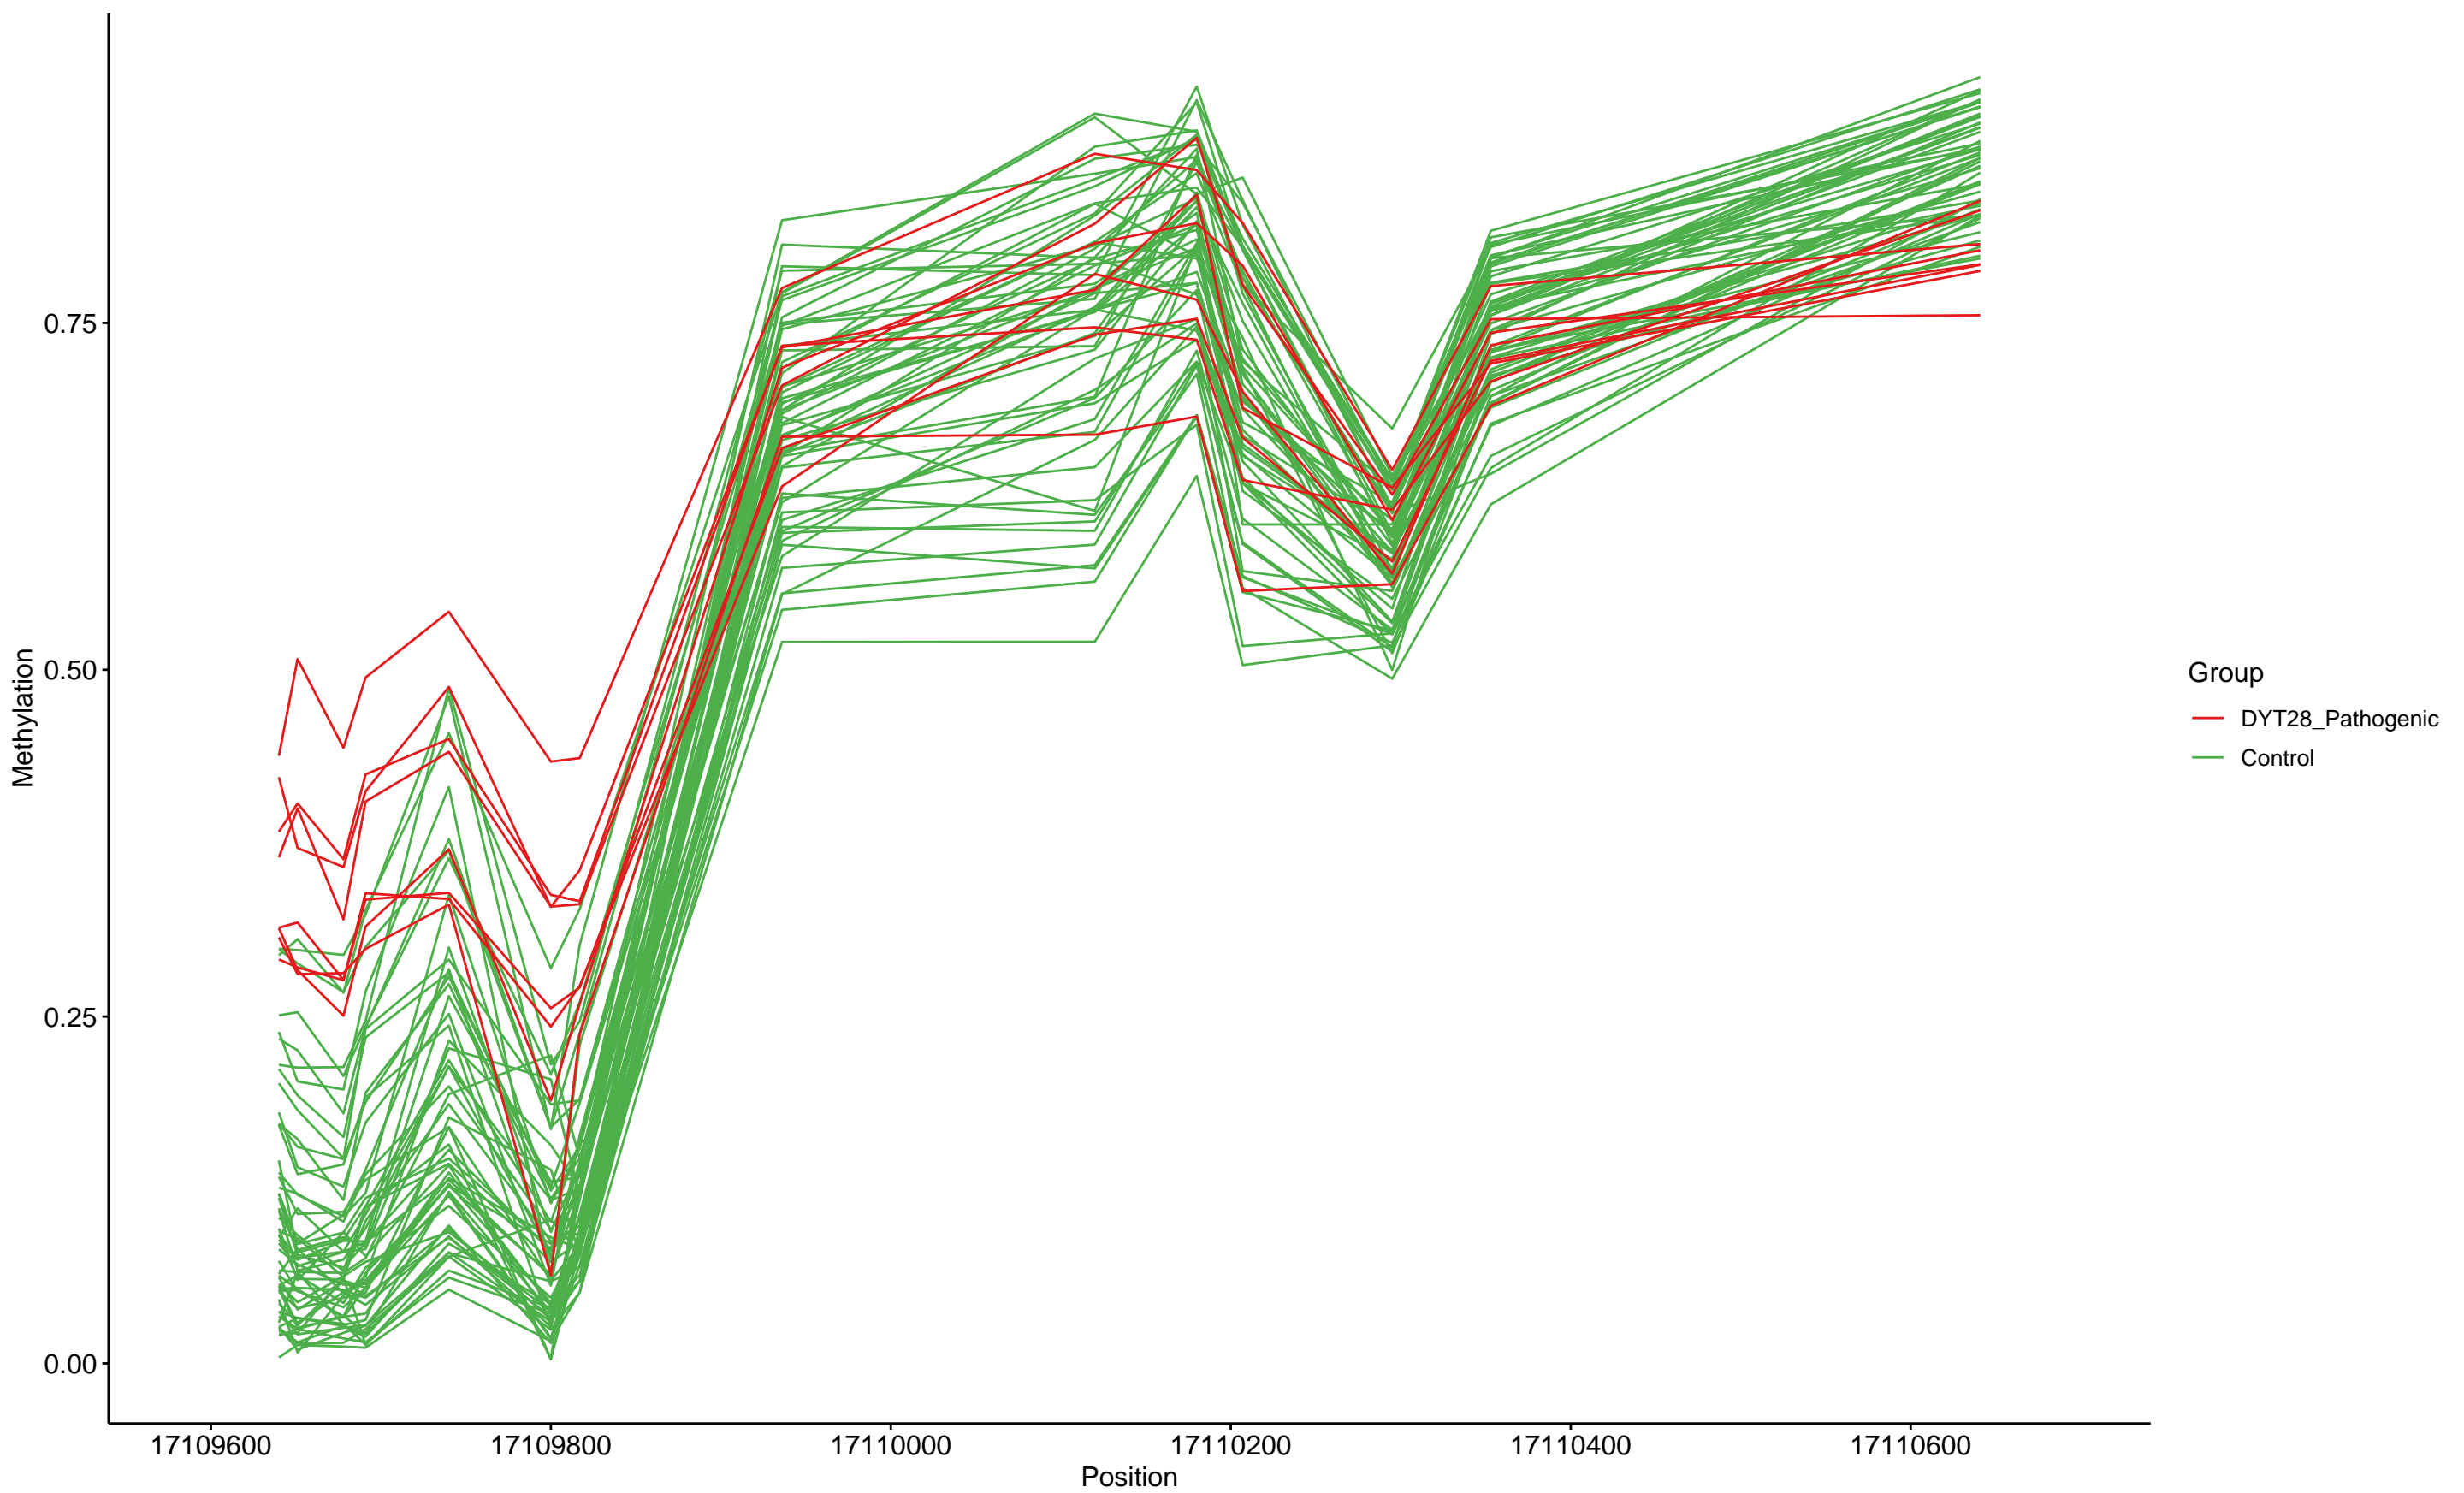

Region 114: chr15:93277307-93278363

Fisher: 2.678624570905e-22

Stouffer: 3.51625874792701e-24

Mean difference: 0.112286411702814

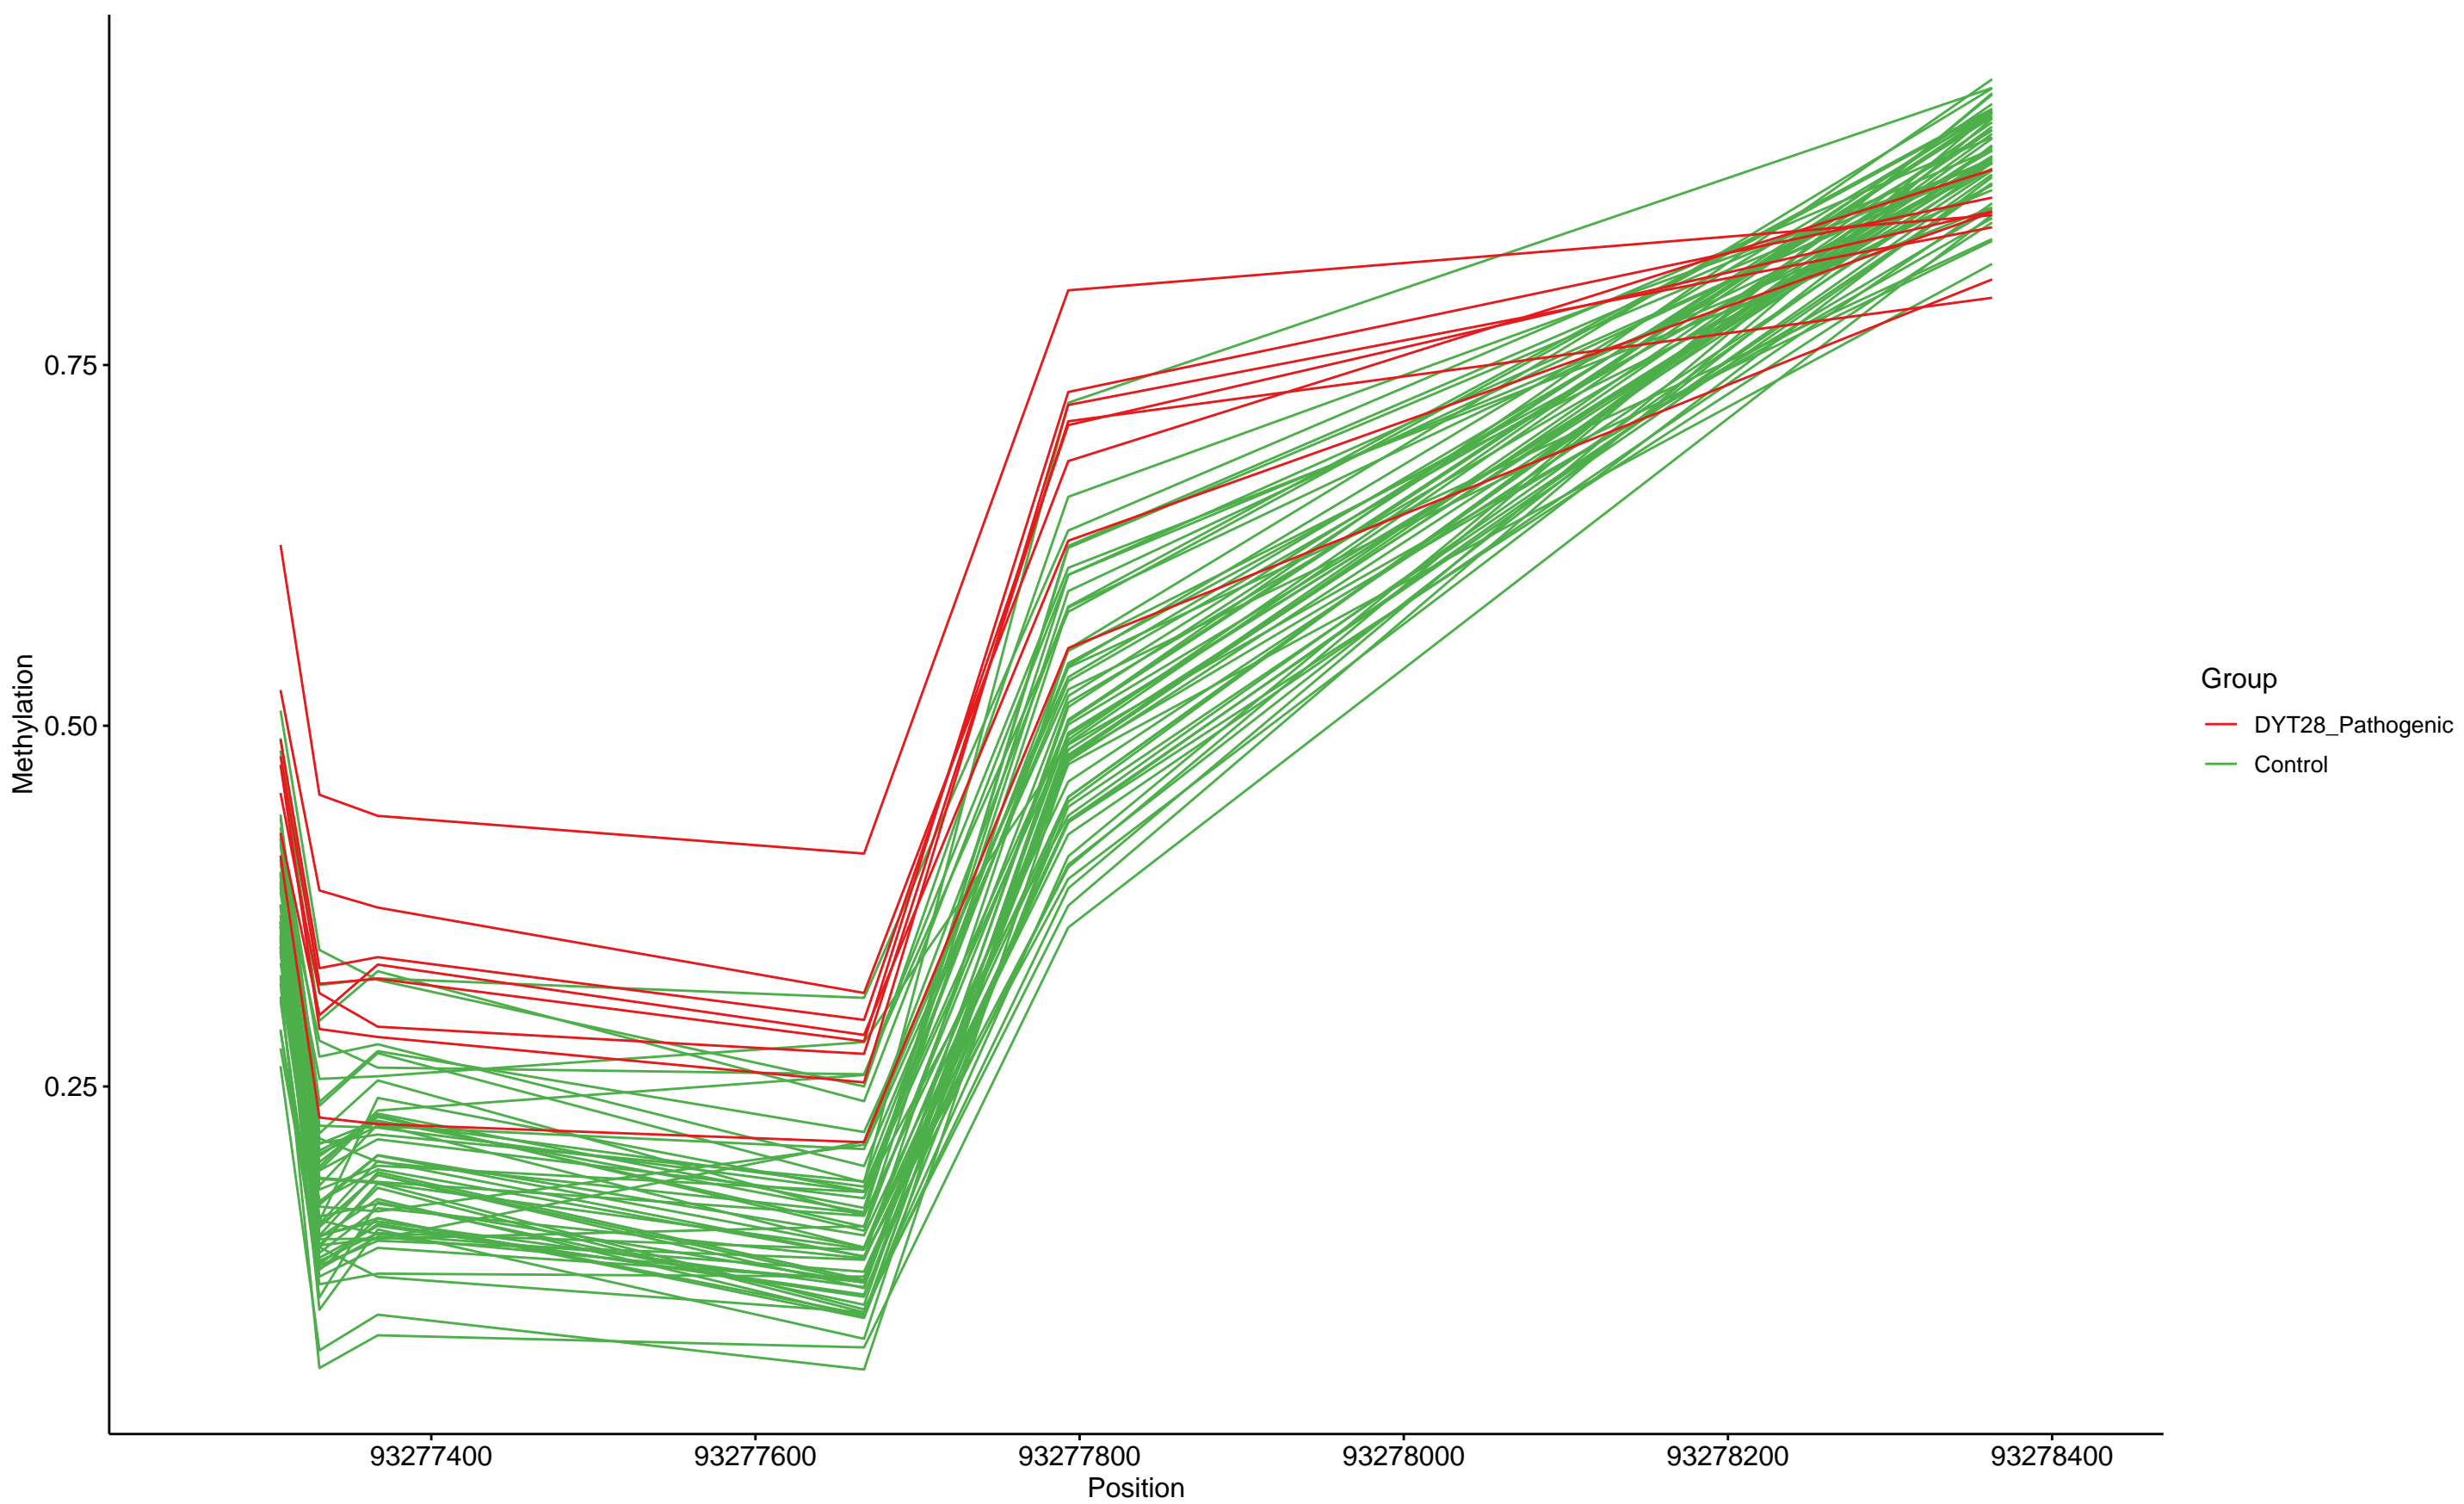

Region 115: chr1:63249197-63250136

Fisher: 2.88047274385005e-22

Stouffer: 1.92853825825983e-15

Mean difference: 0.1314283265091

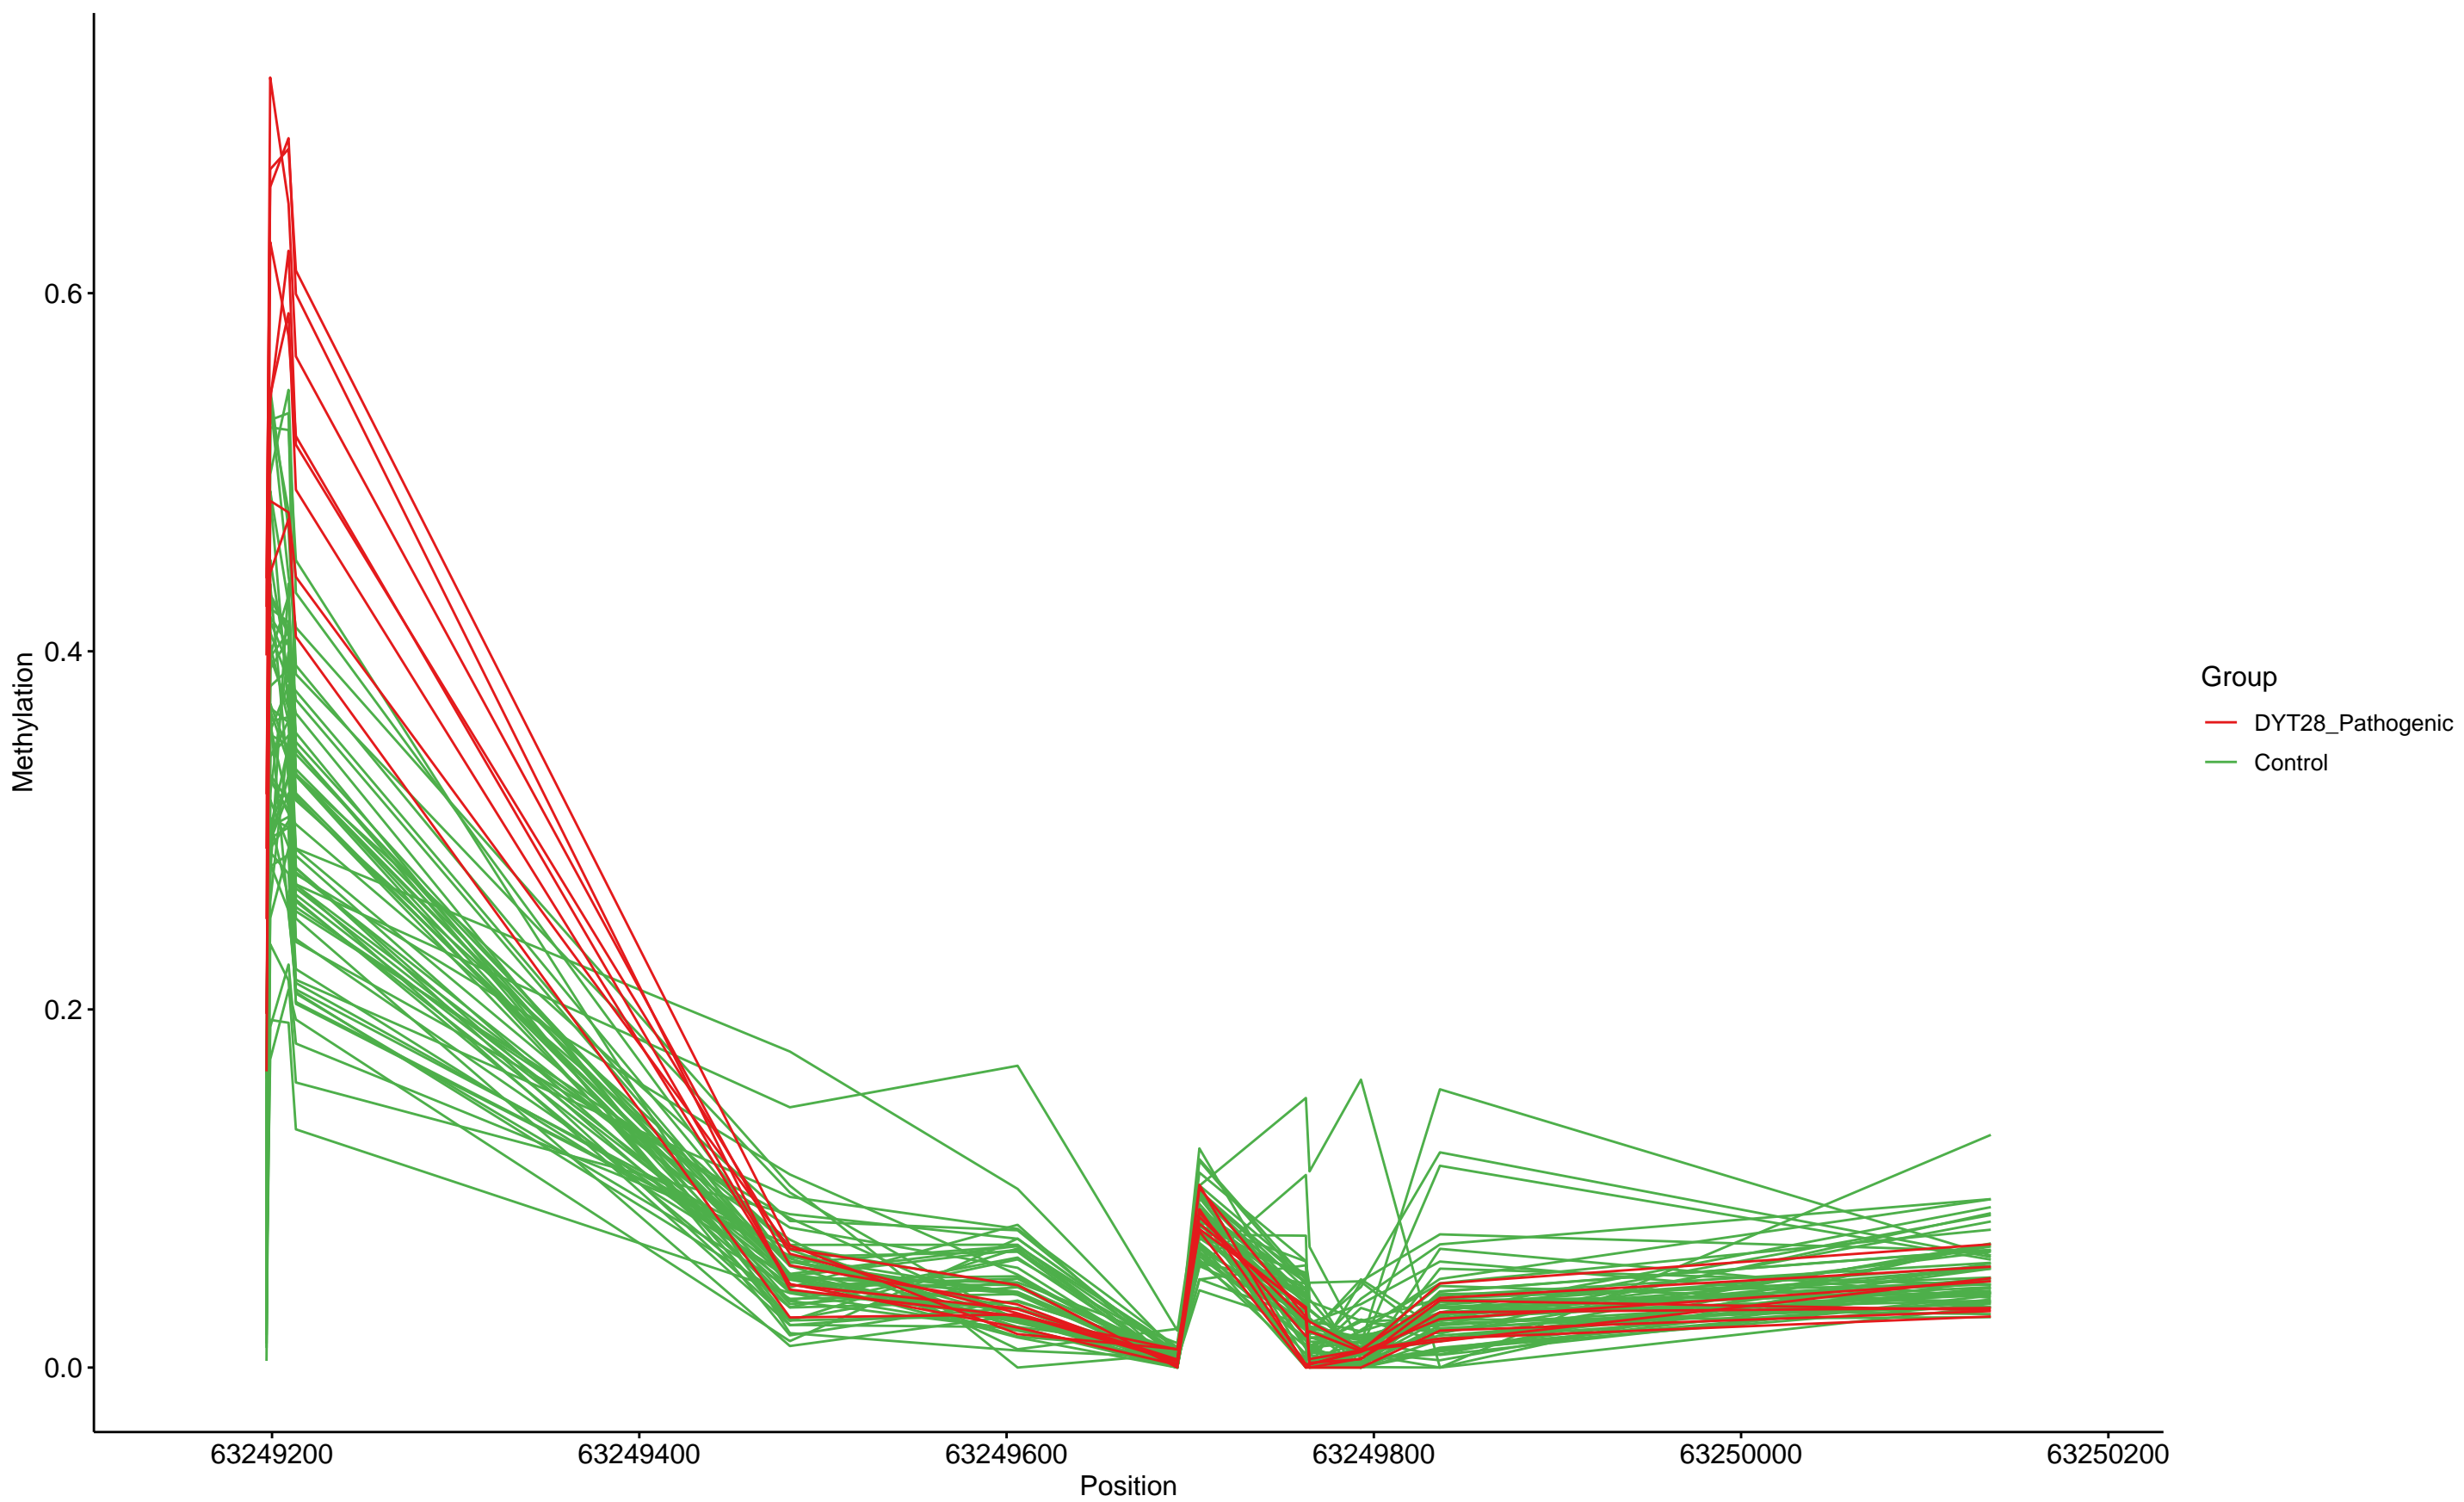

Region 116: chr16:30572739–30573013

Fisher: 3.93527428153069e-22

Stouffer: 2.12297149752161e-23

Mean difference: 0.146647370369895

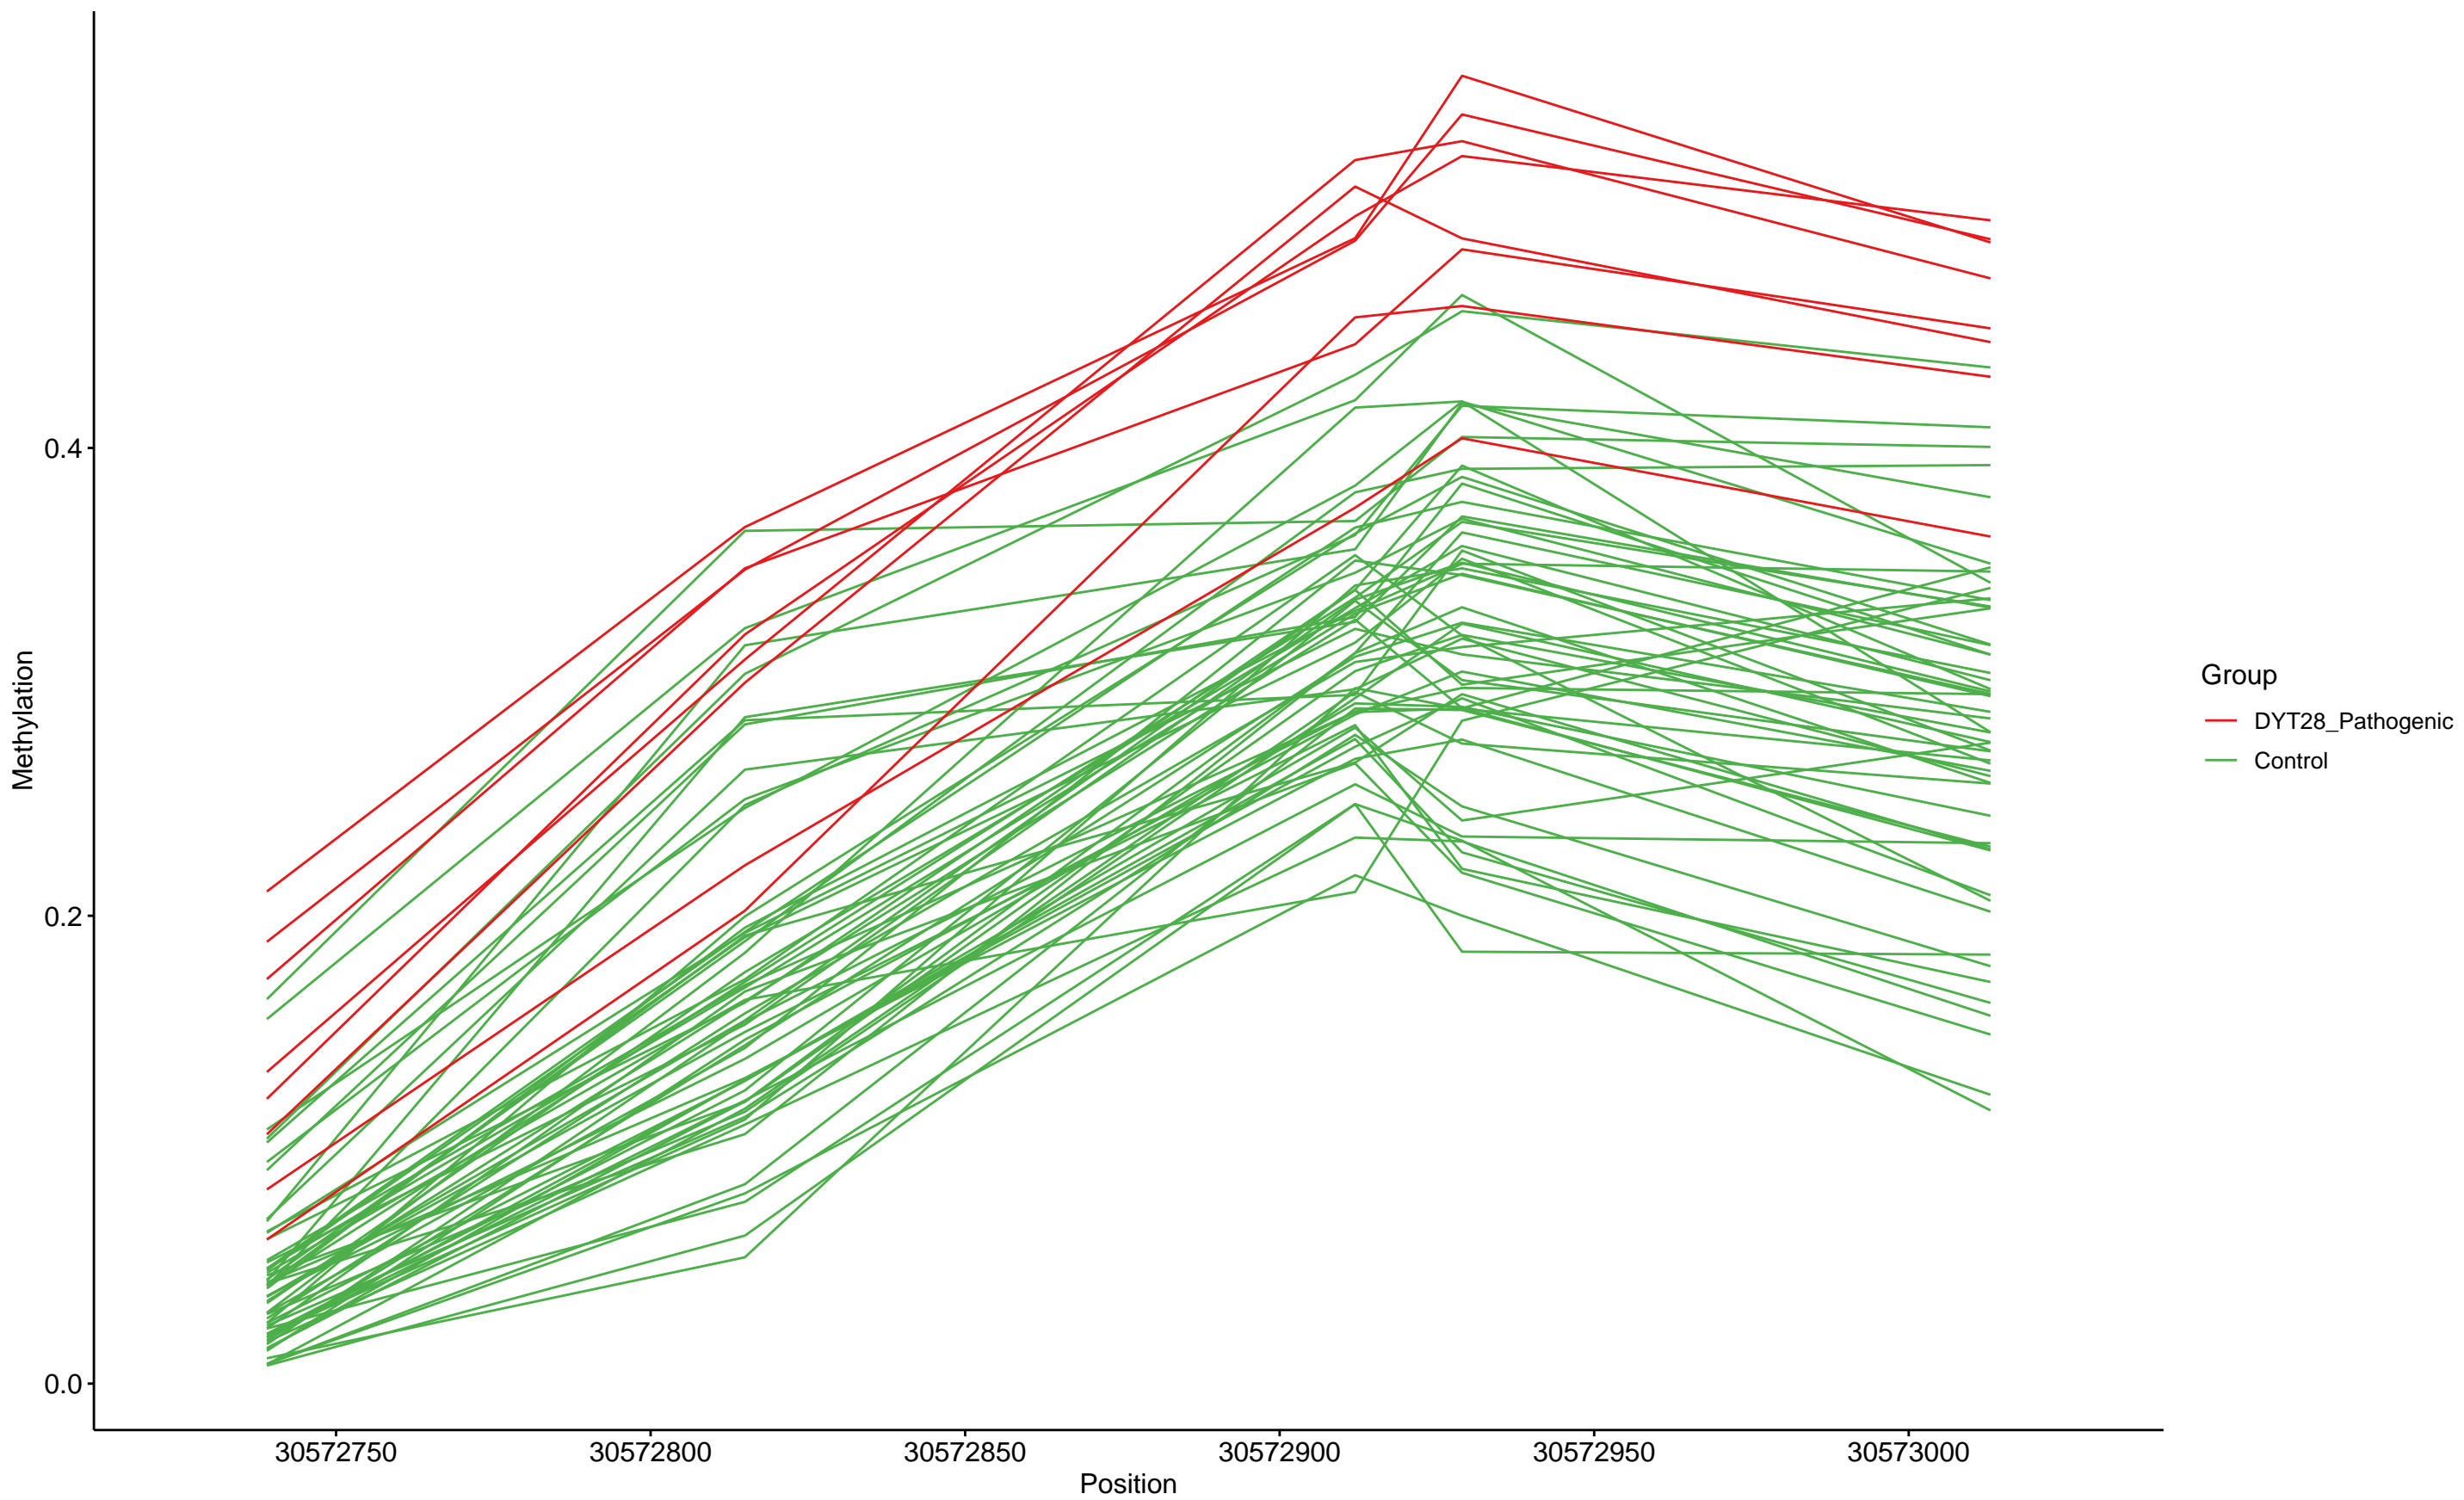



Region 117: chr5:116790447-116791458

Fisher: 5.09547607421223e-22

Stouffer: 3.22444246324134e-22

Mean difference: 0.117941792845917

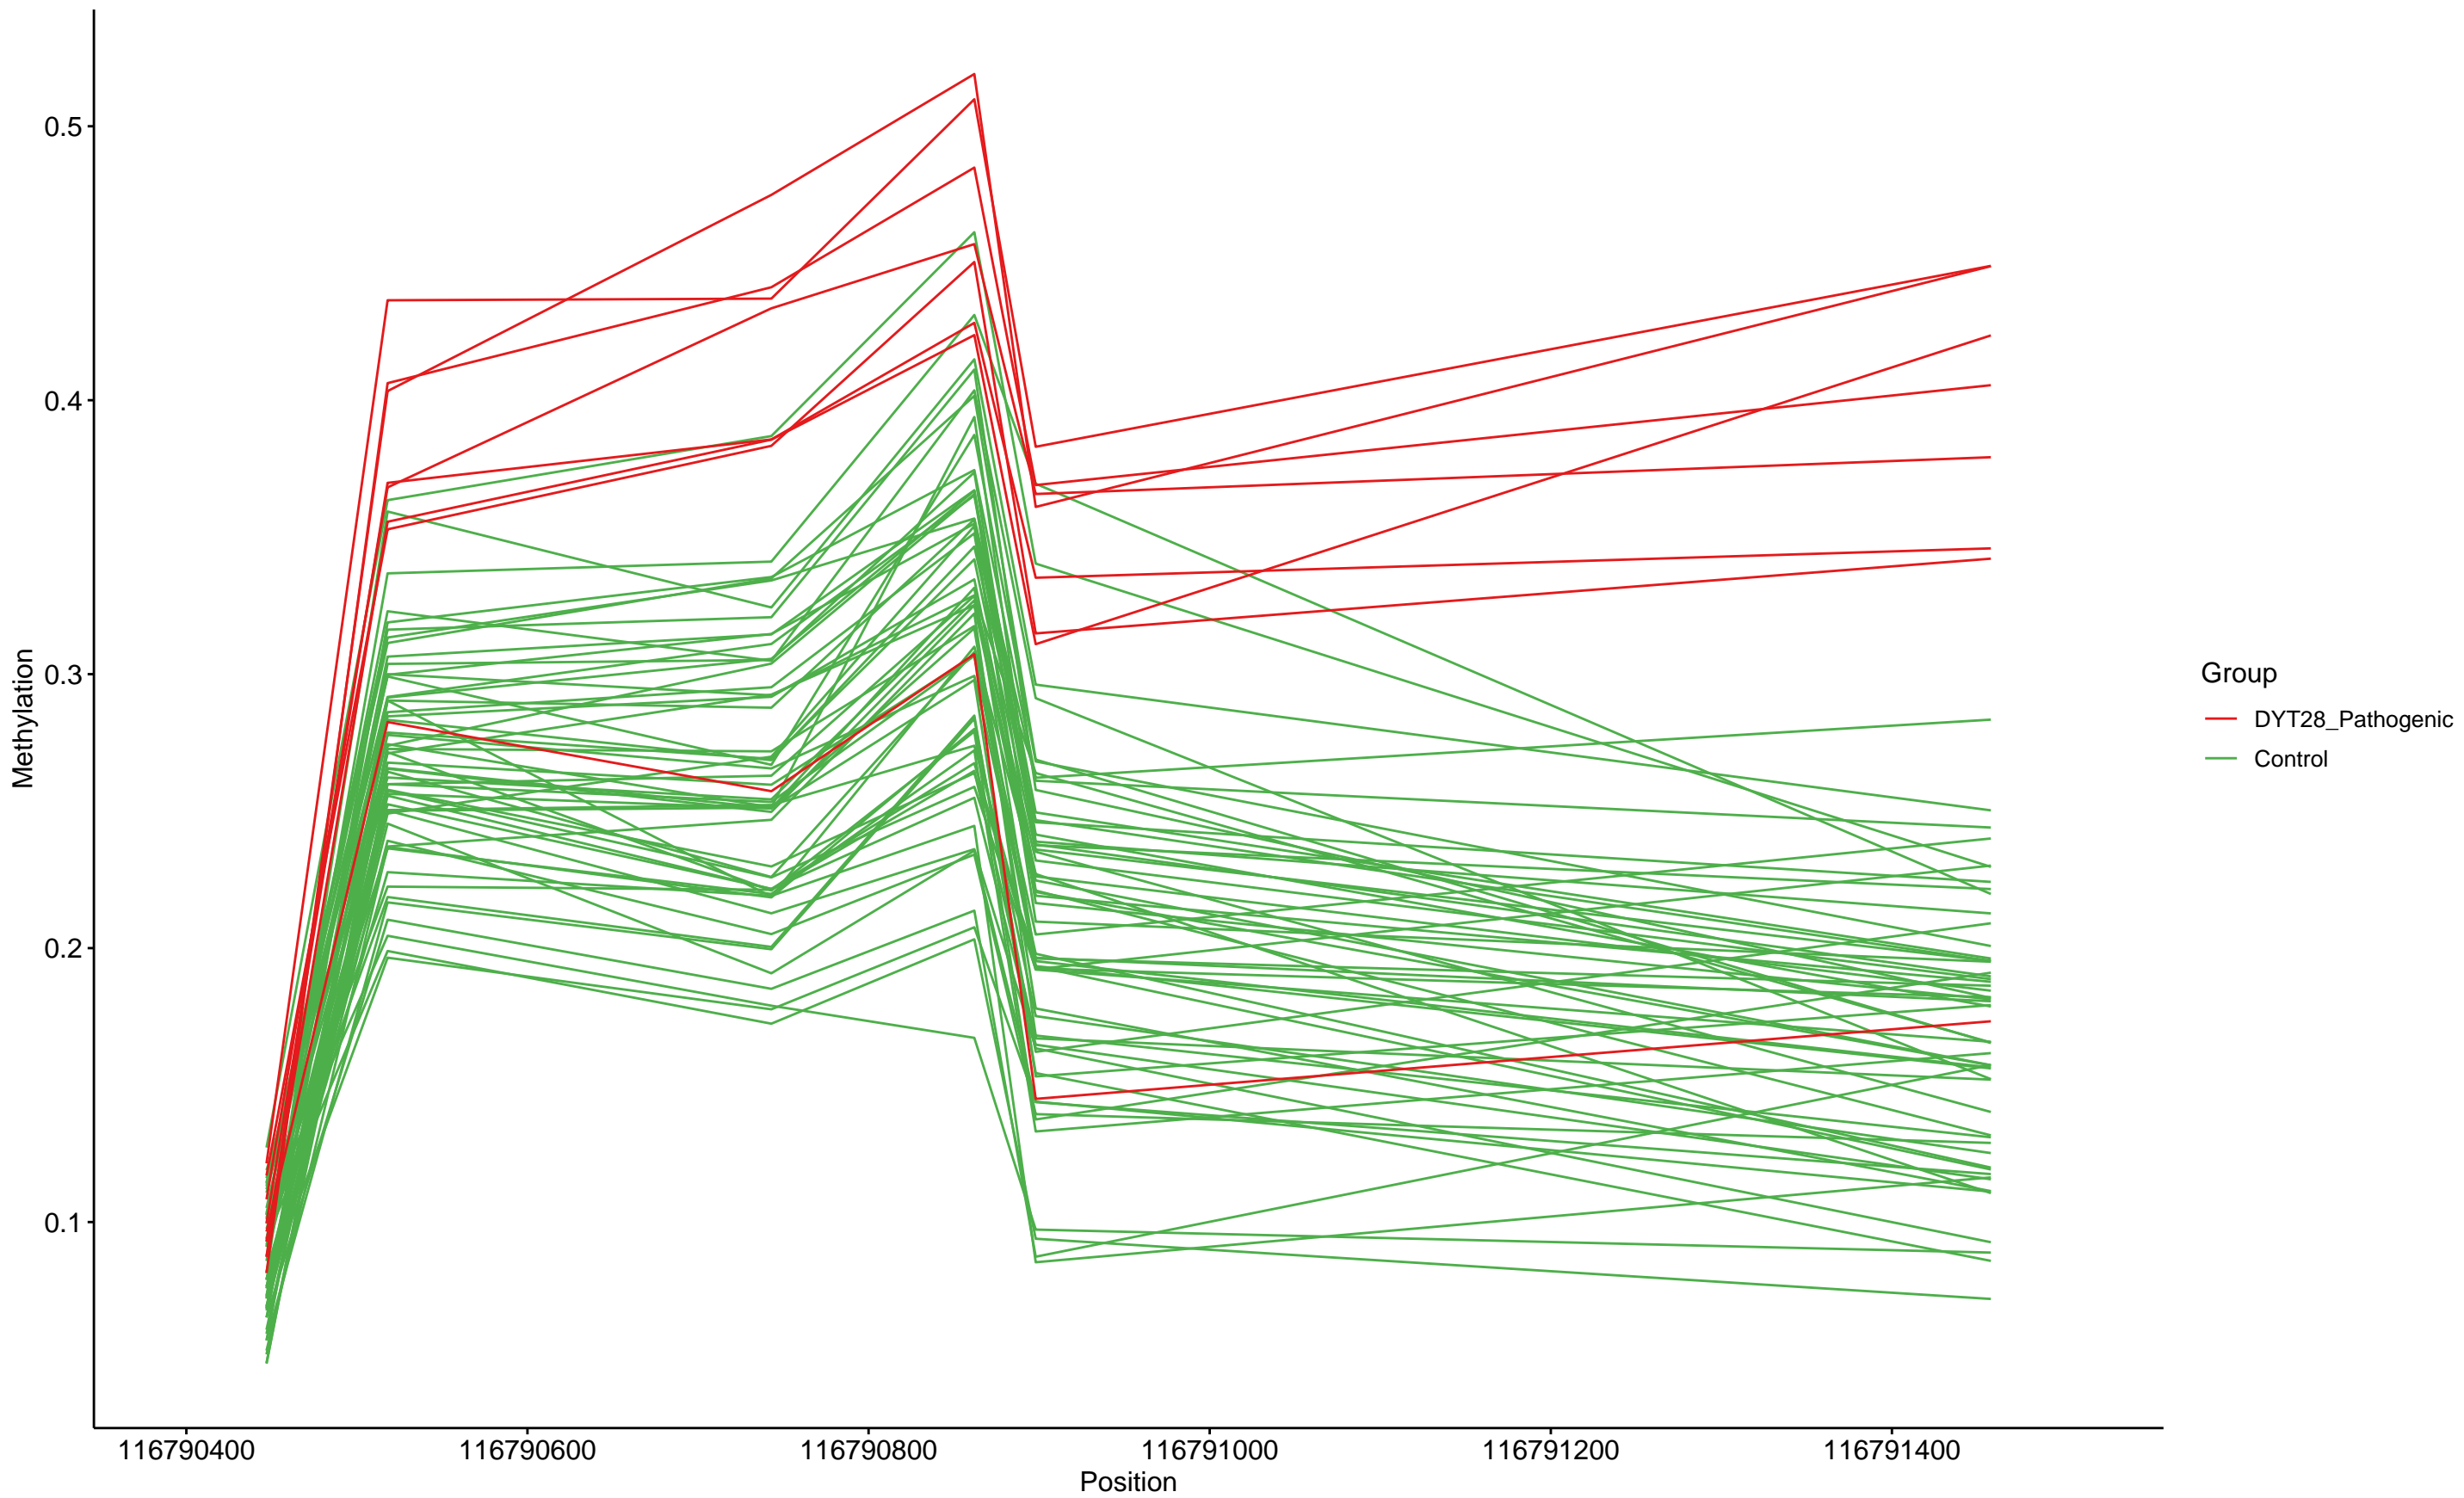

Region 118: chr1:41981735–41982392

Fisher:  $5.56671793139356e-22$

Stouffer:  $9.68096378245388e-22$

Mean difference: 0.115154403592016

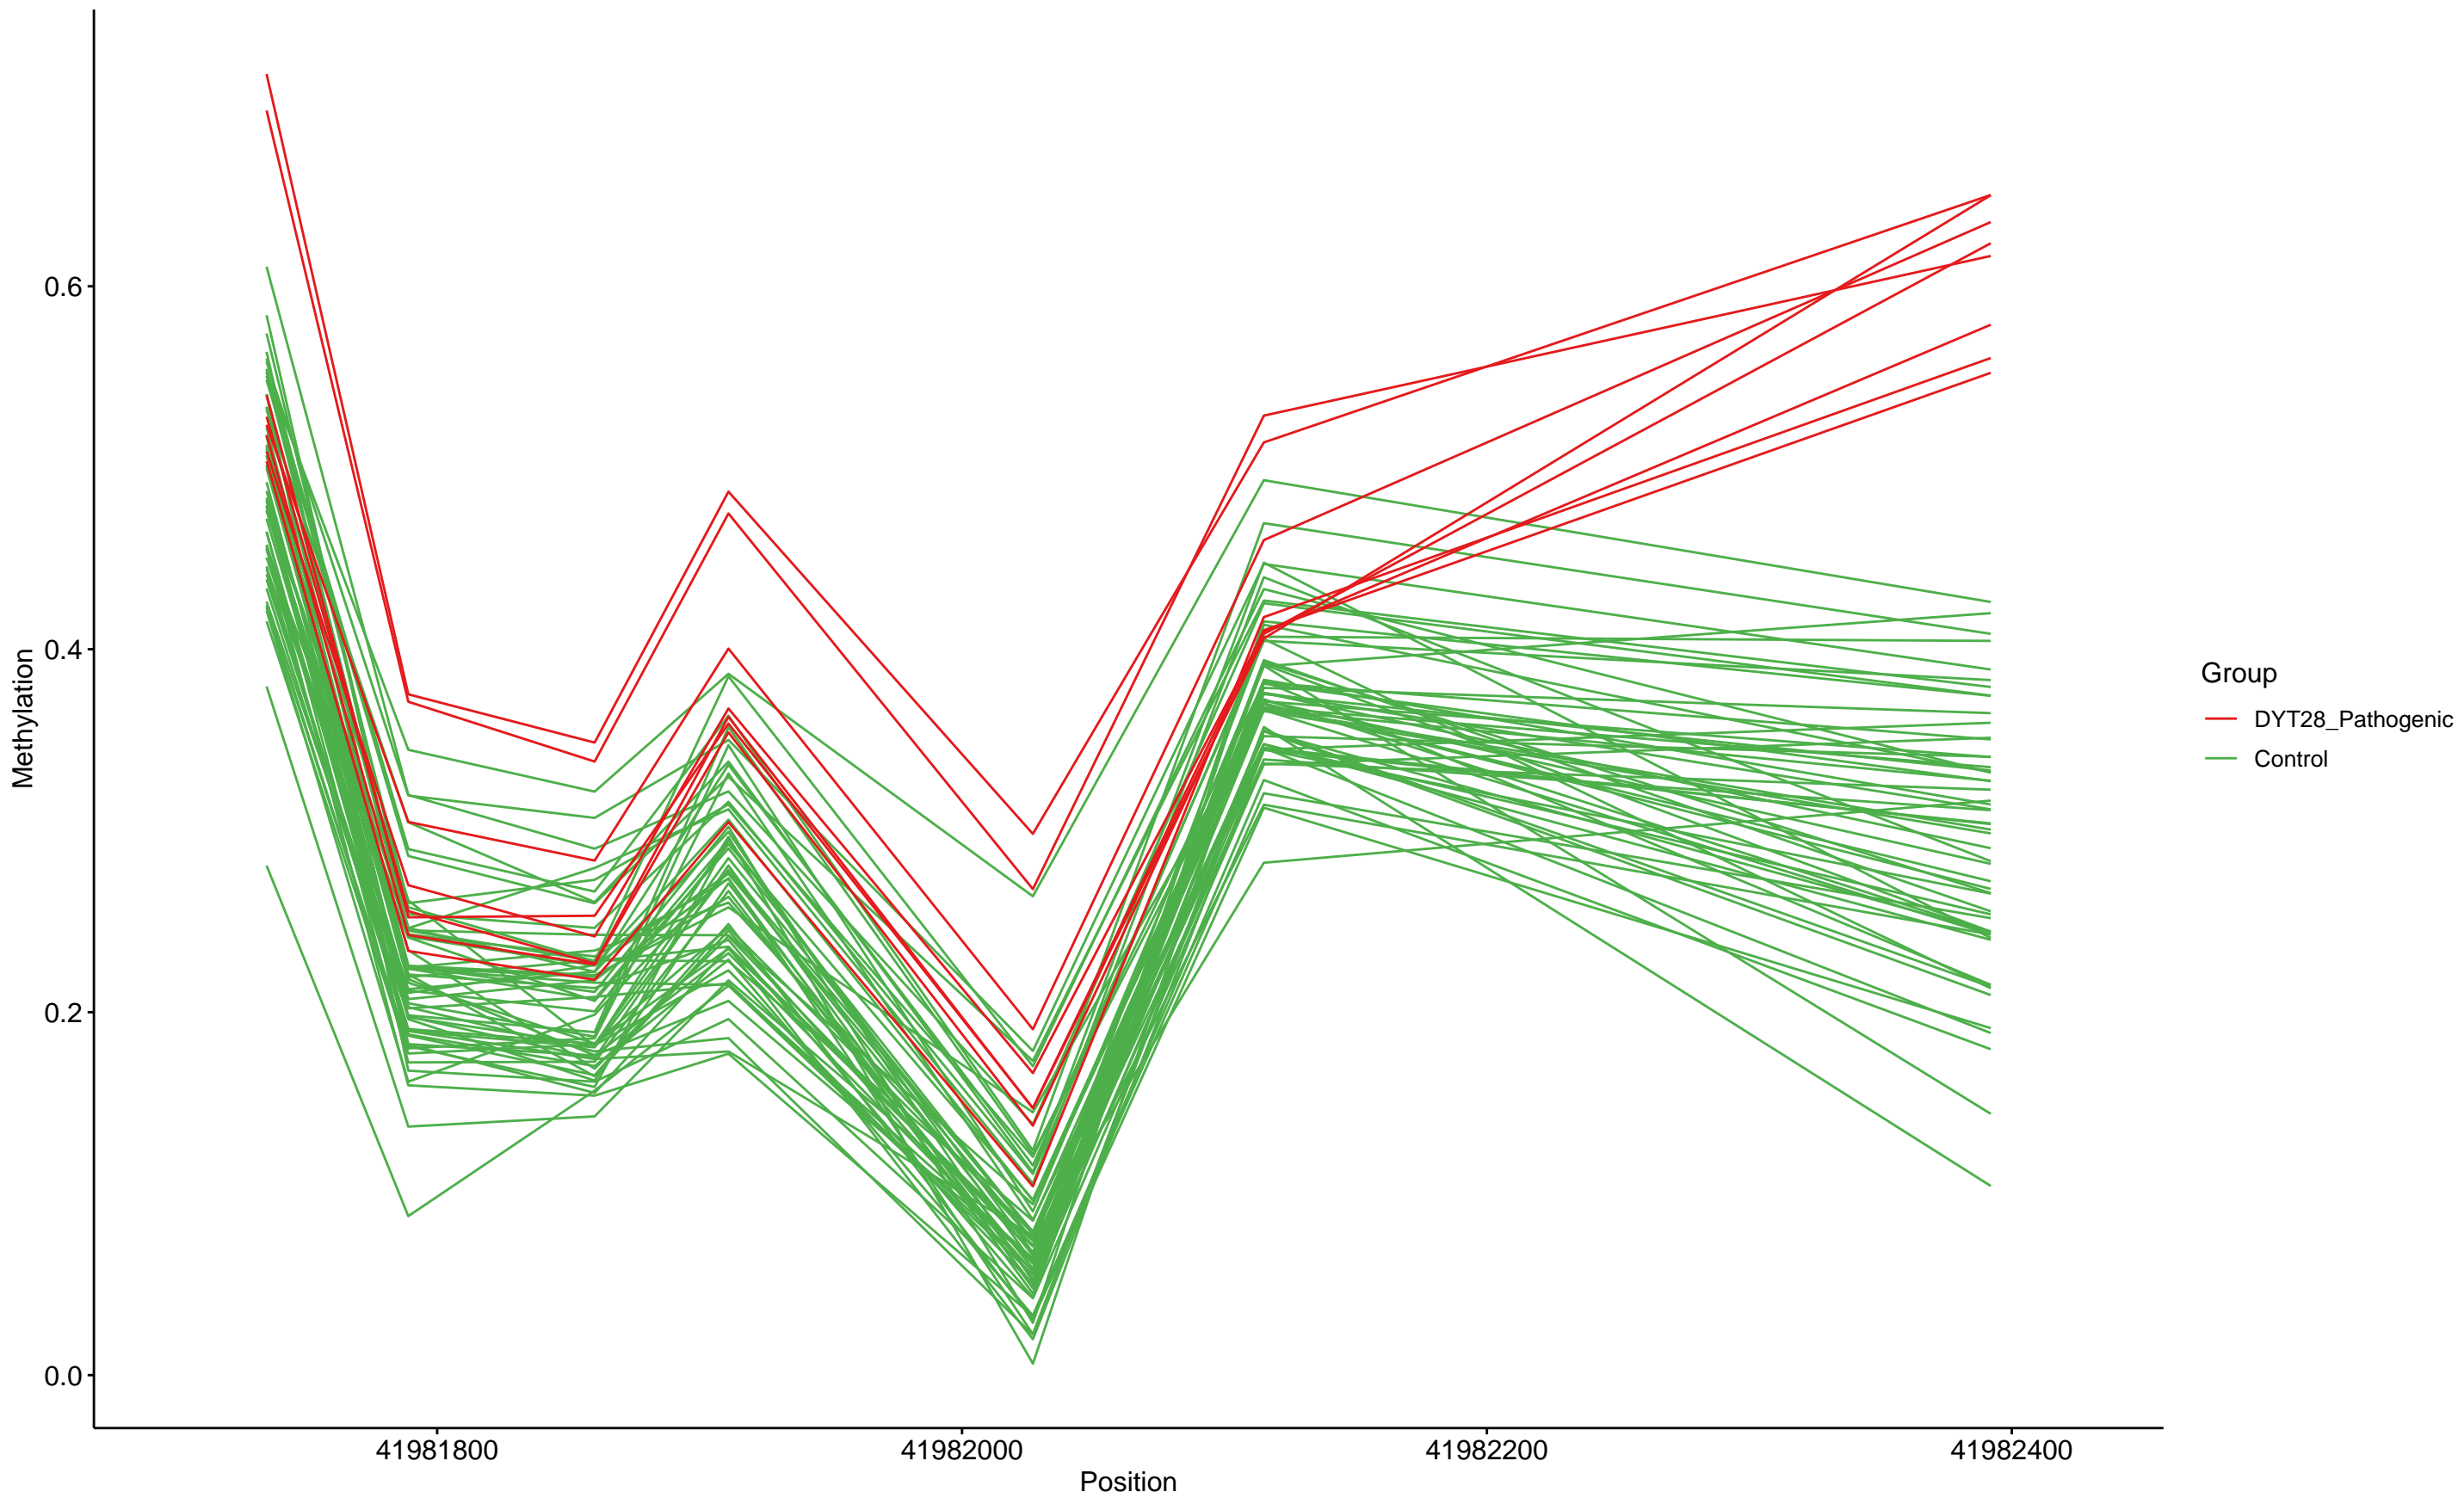

Region 119: chr2:8596070–8597923

Fisher: 5.75655883028104e-22

Stouffer: 2.51702080673396e-23

Mean difference: 0.108777090025351

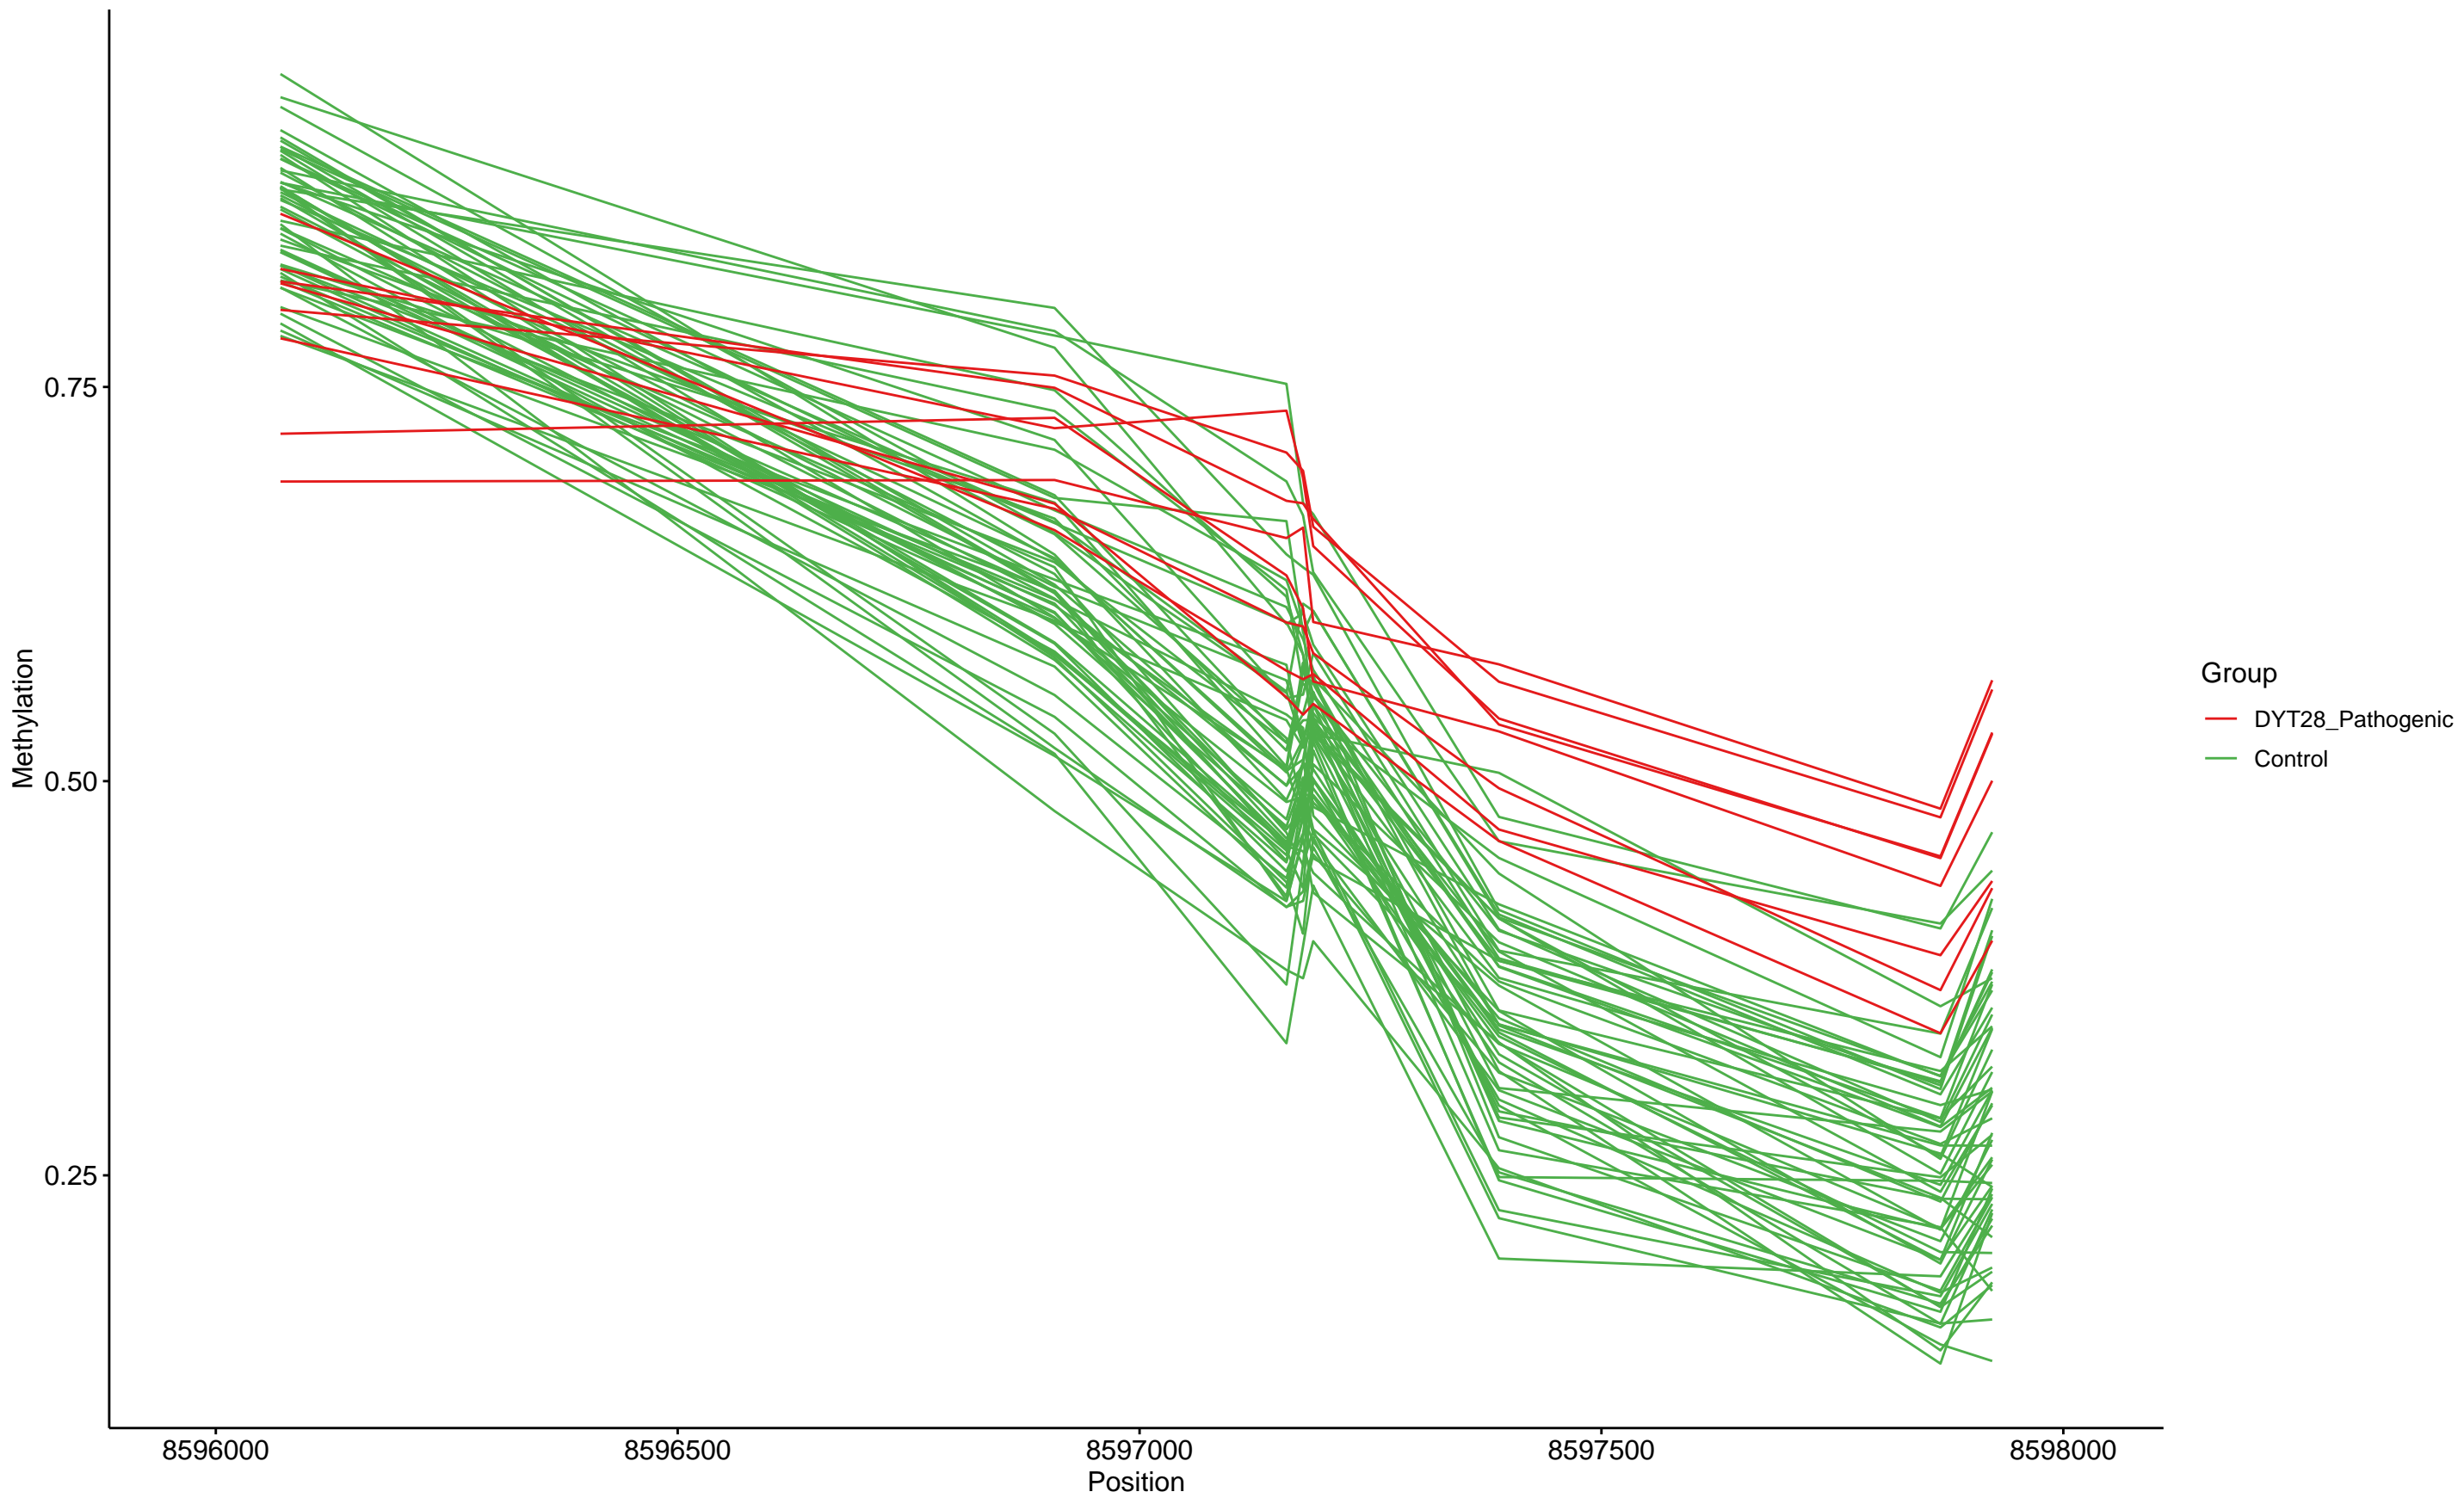



Region 120: chr18:32847251-32848016

Fisher: 2.54949875448704e-21

Stouffer: 1.66777830389928e-20

Mean difference: 0.120627354150426

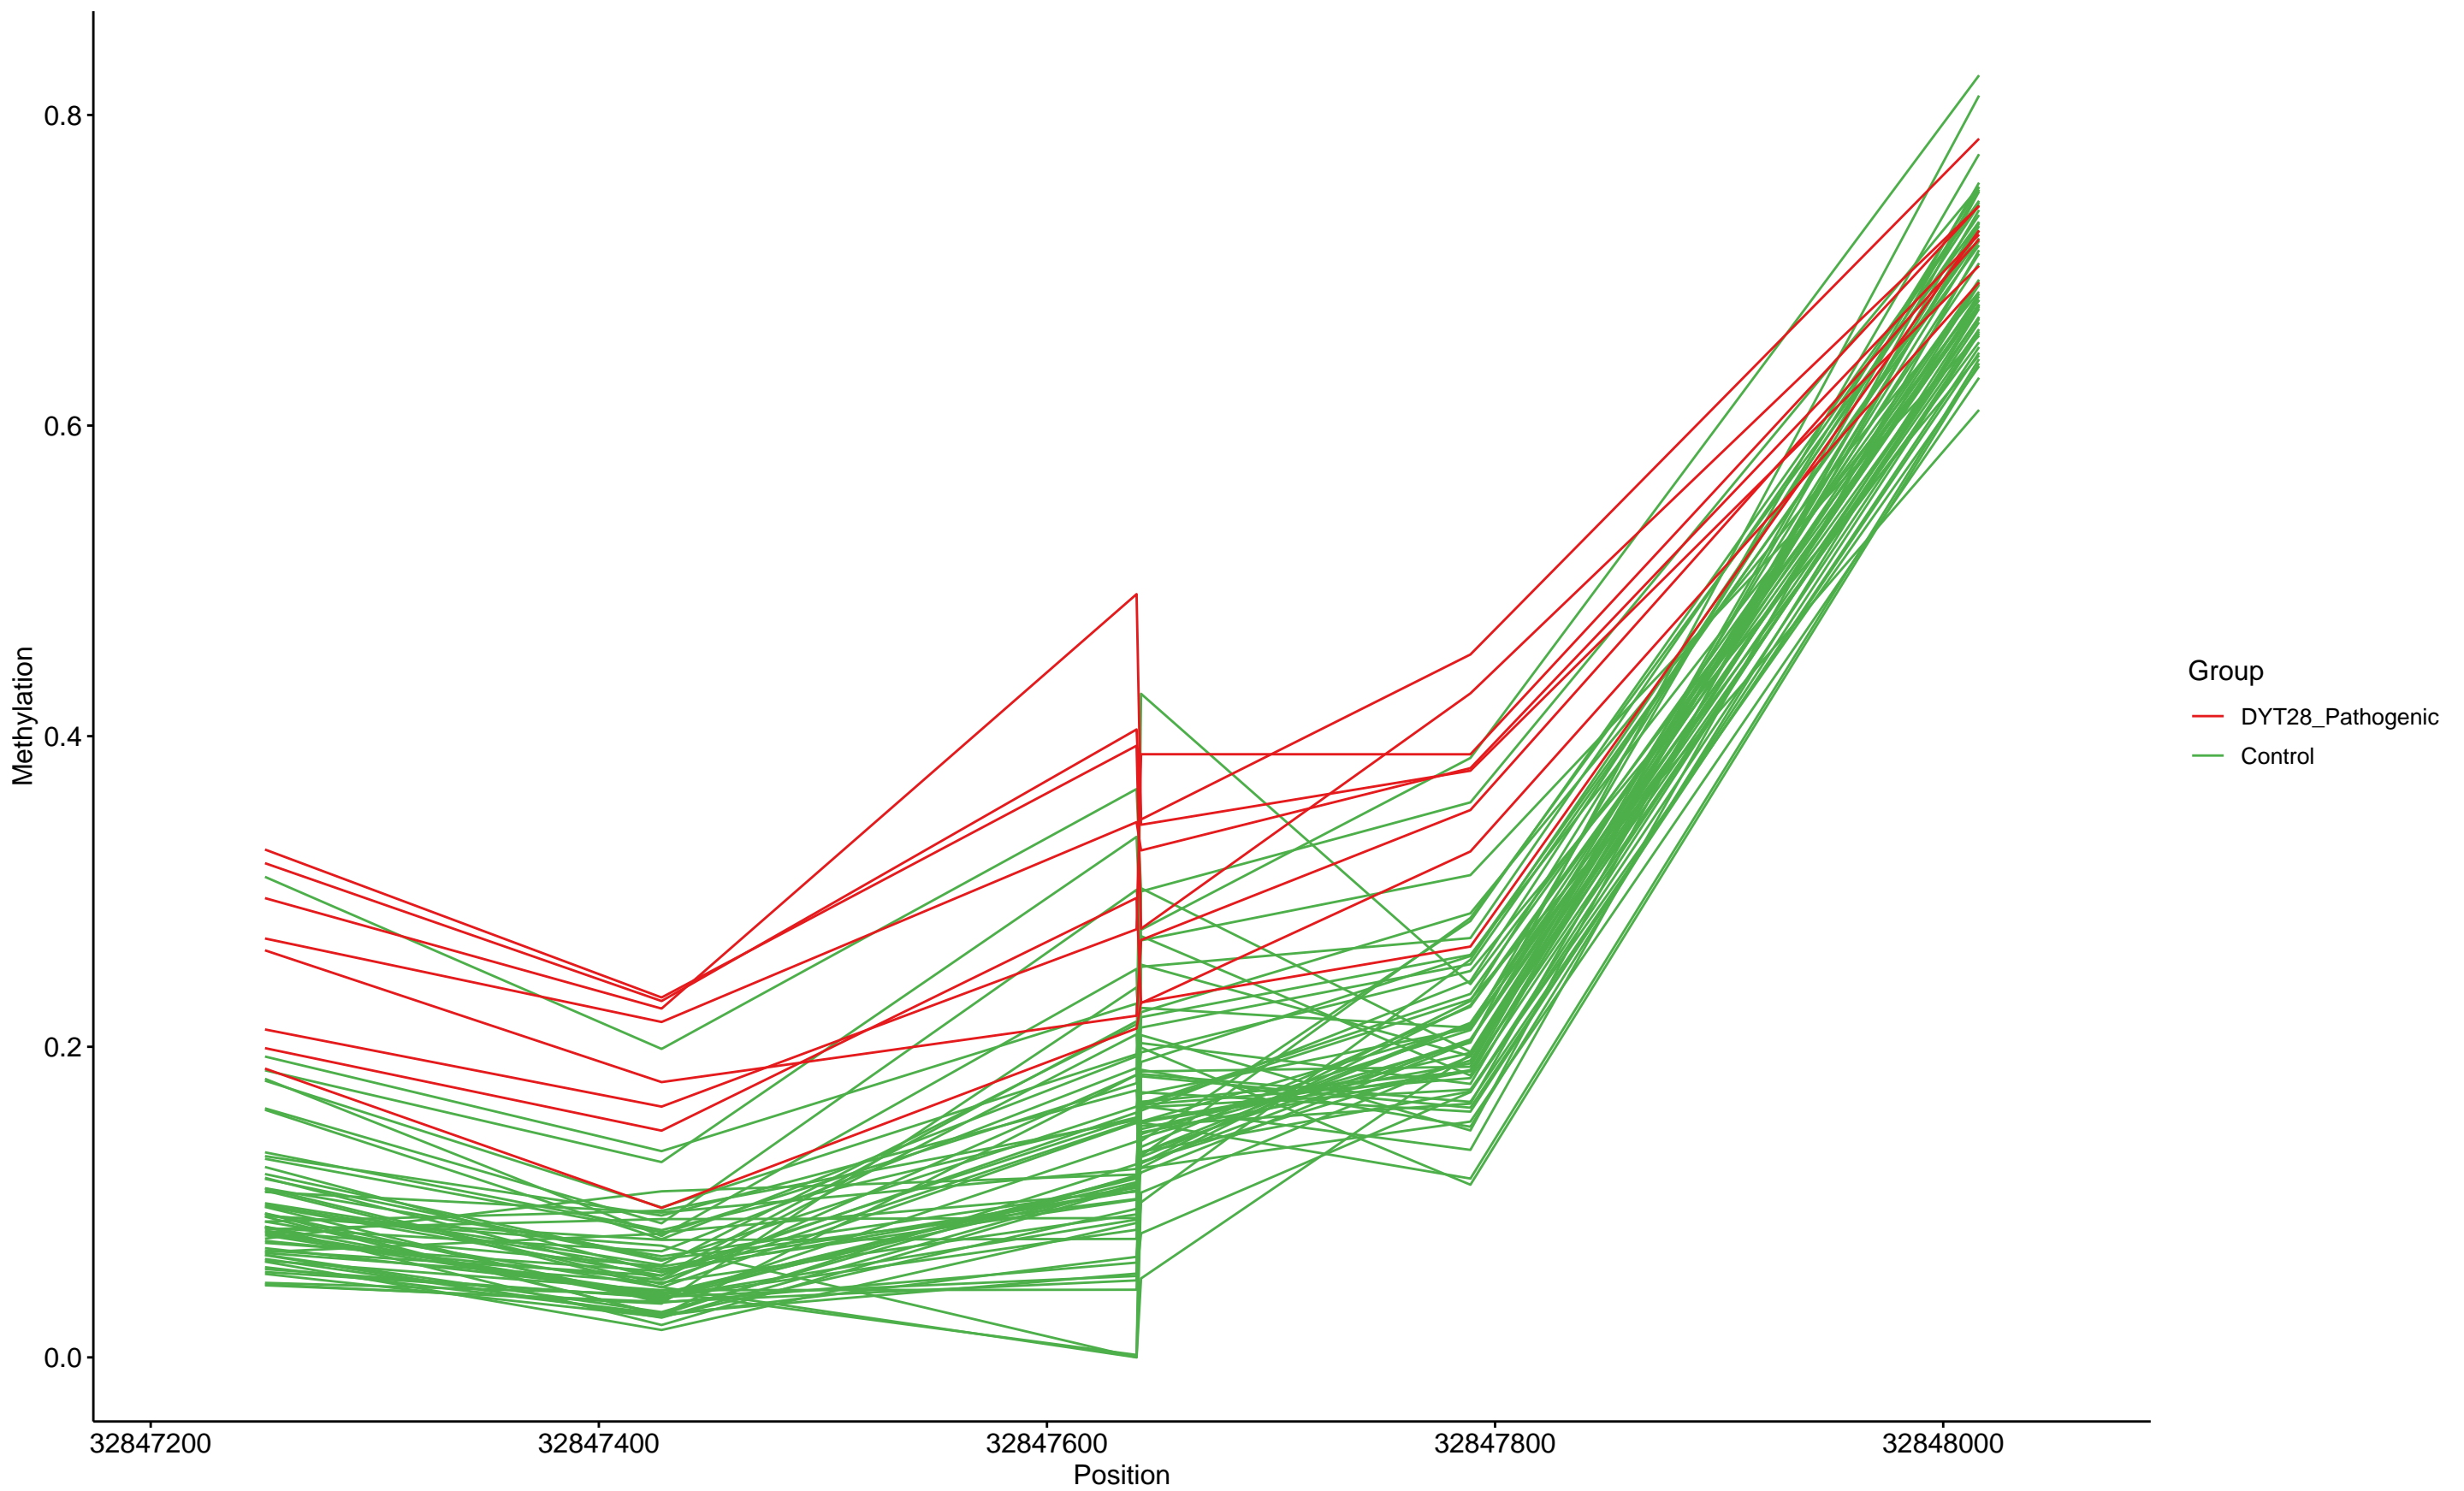



Region 121: chr6:88756897-88758044

Fisher: 3.81326664815218e-21

Stouffer: 1.36192383547785e-17

Mean difference: 0.100683943754725

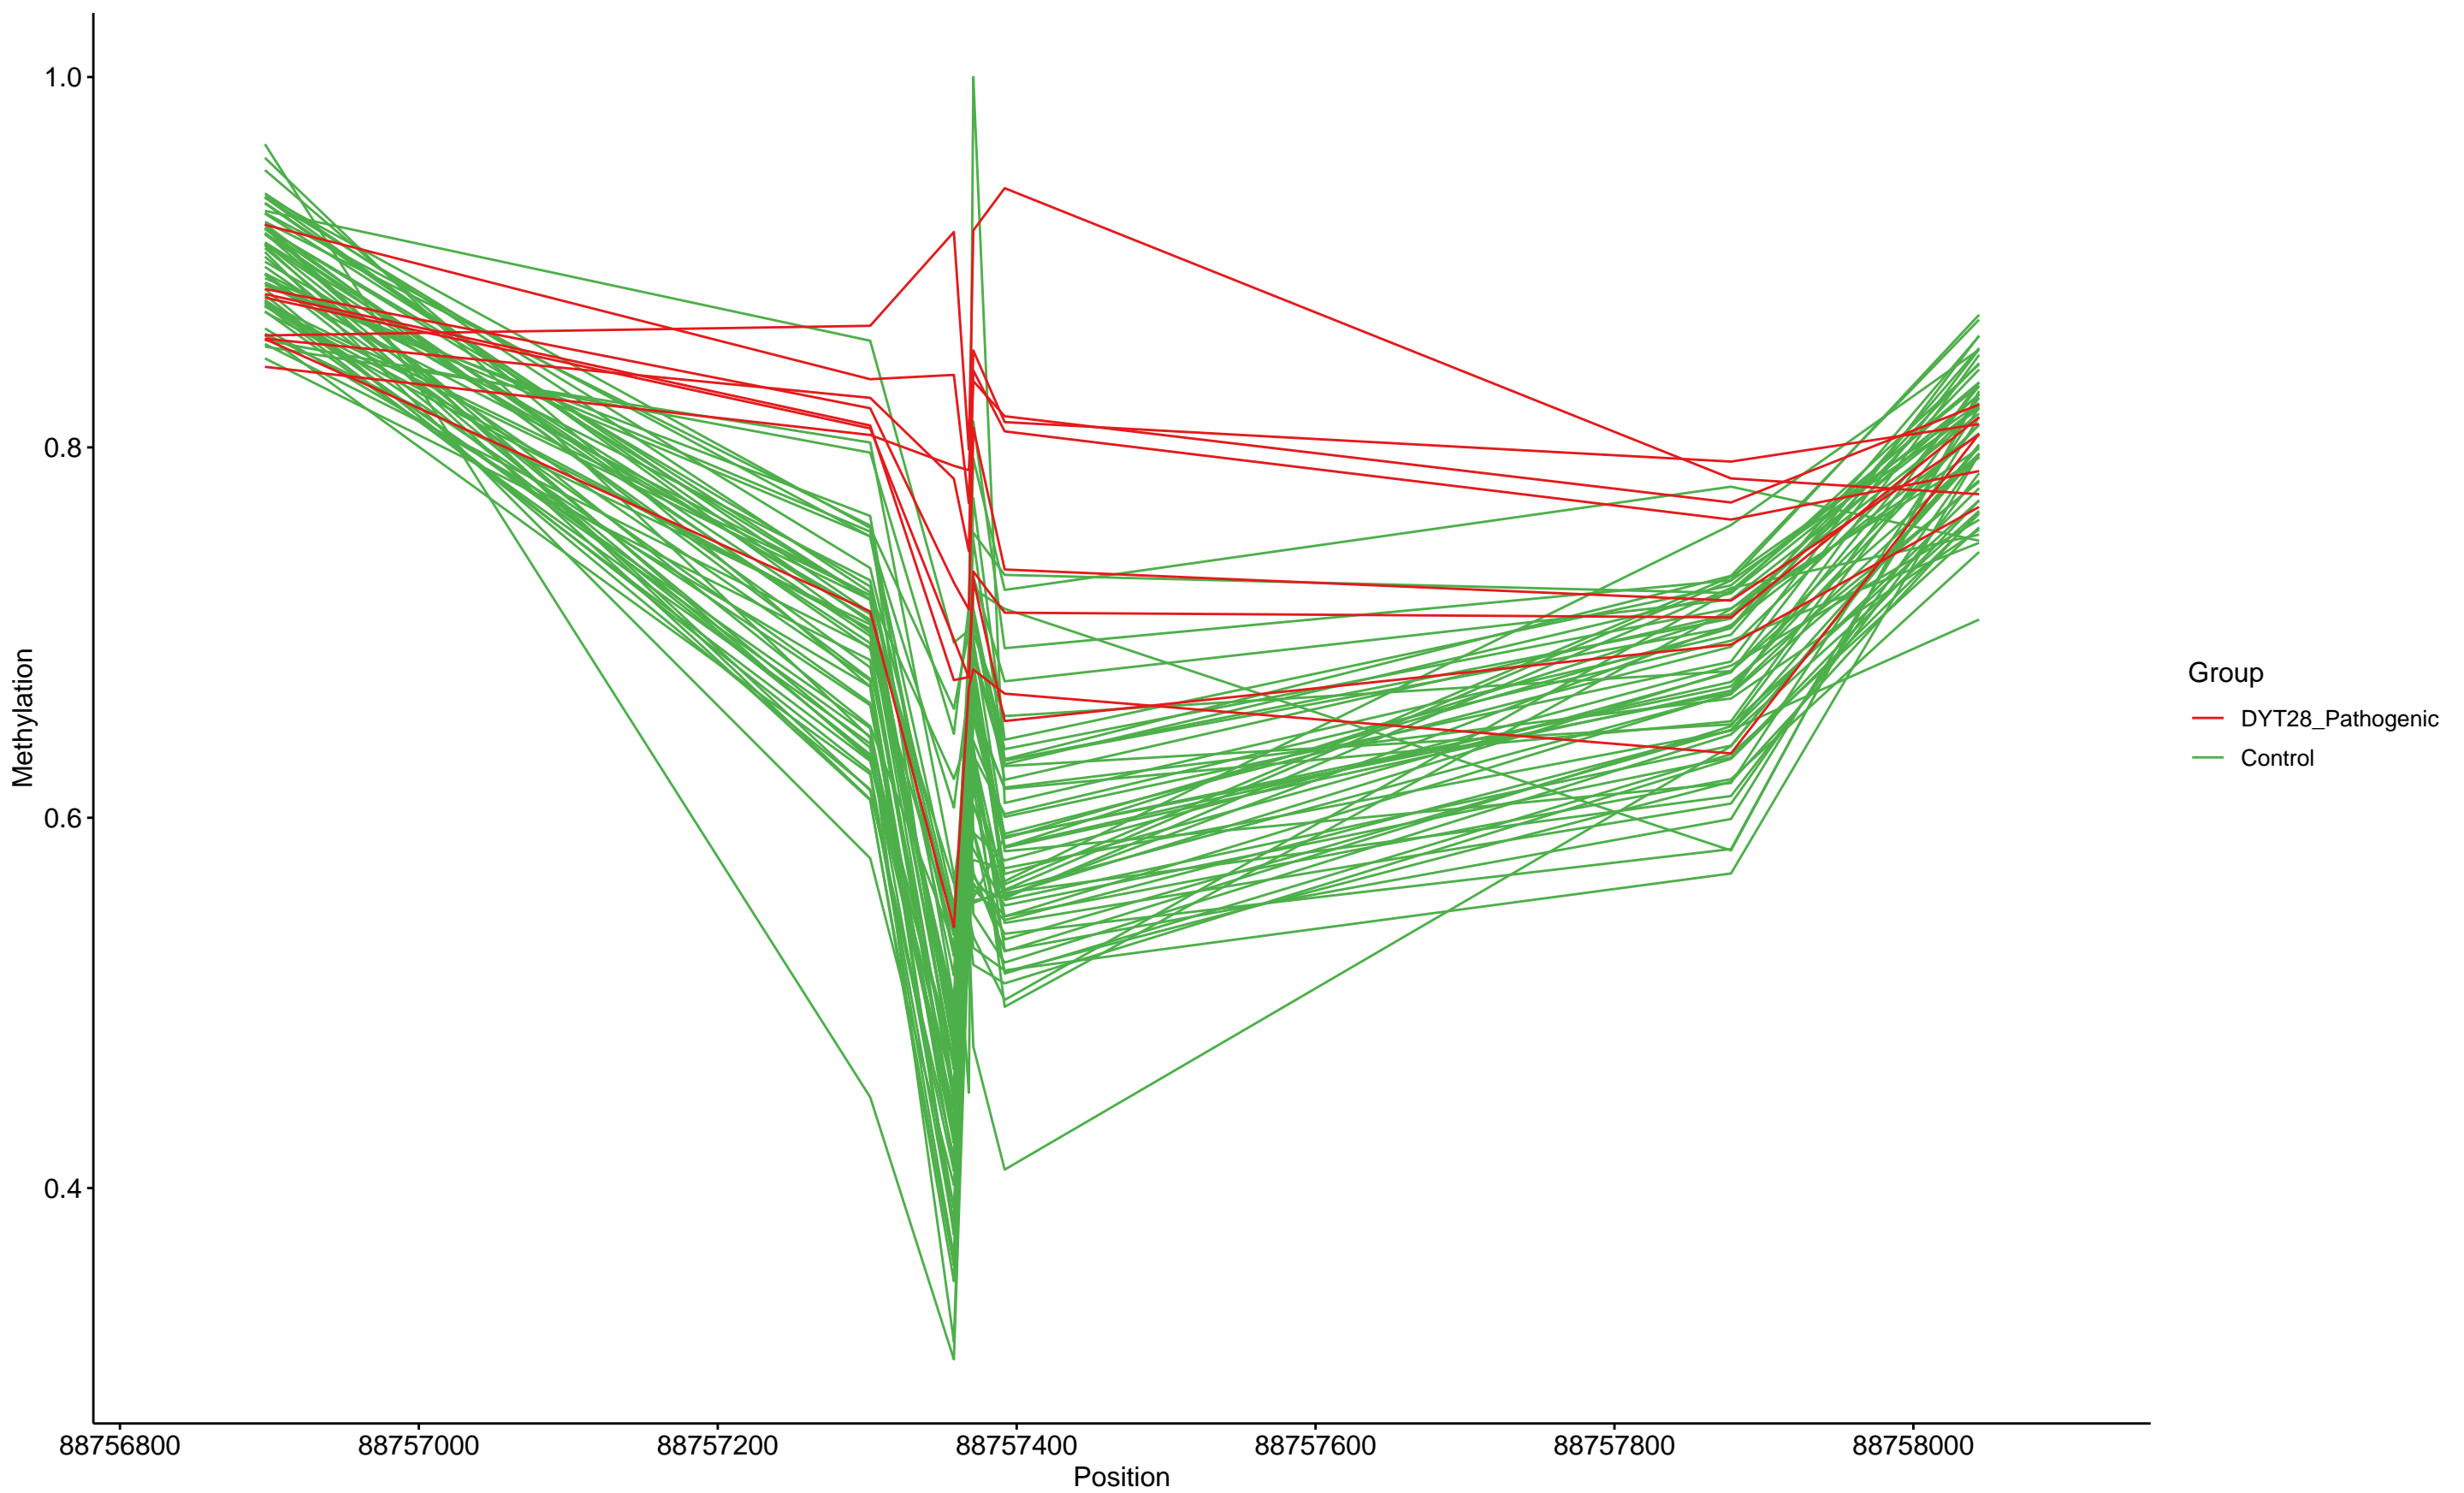

Region 122: chr19:38885050–38886789

Fisher:  $6.24871488661426e-21$

Stouffer:  $9.22891687513109e-22$

Mean difference: 0.108122355080582

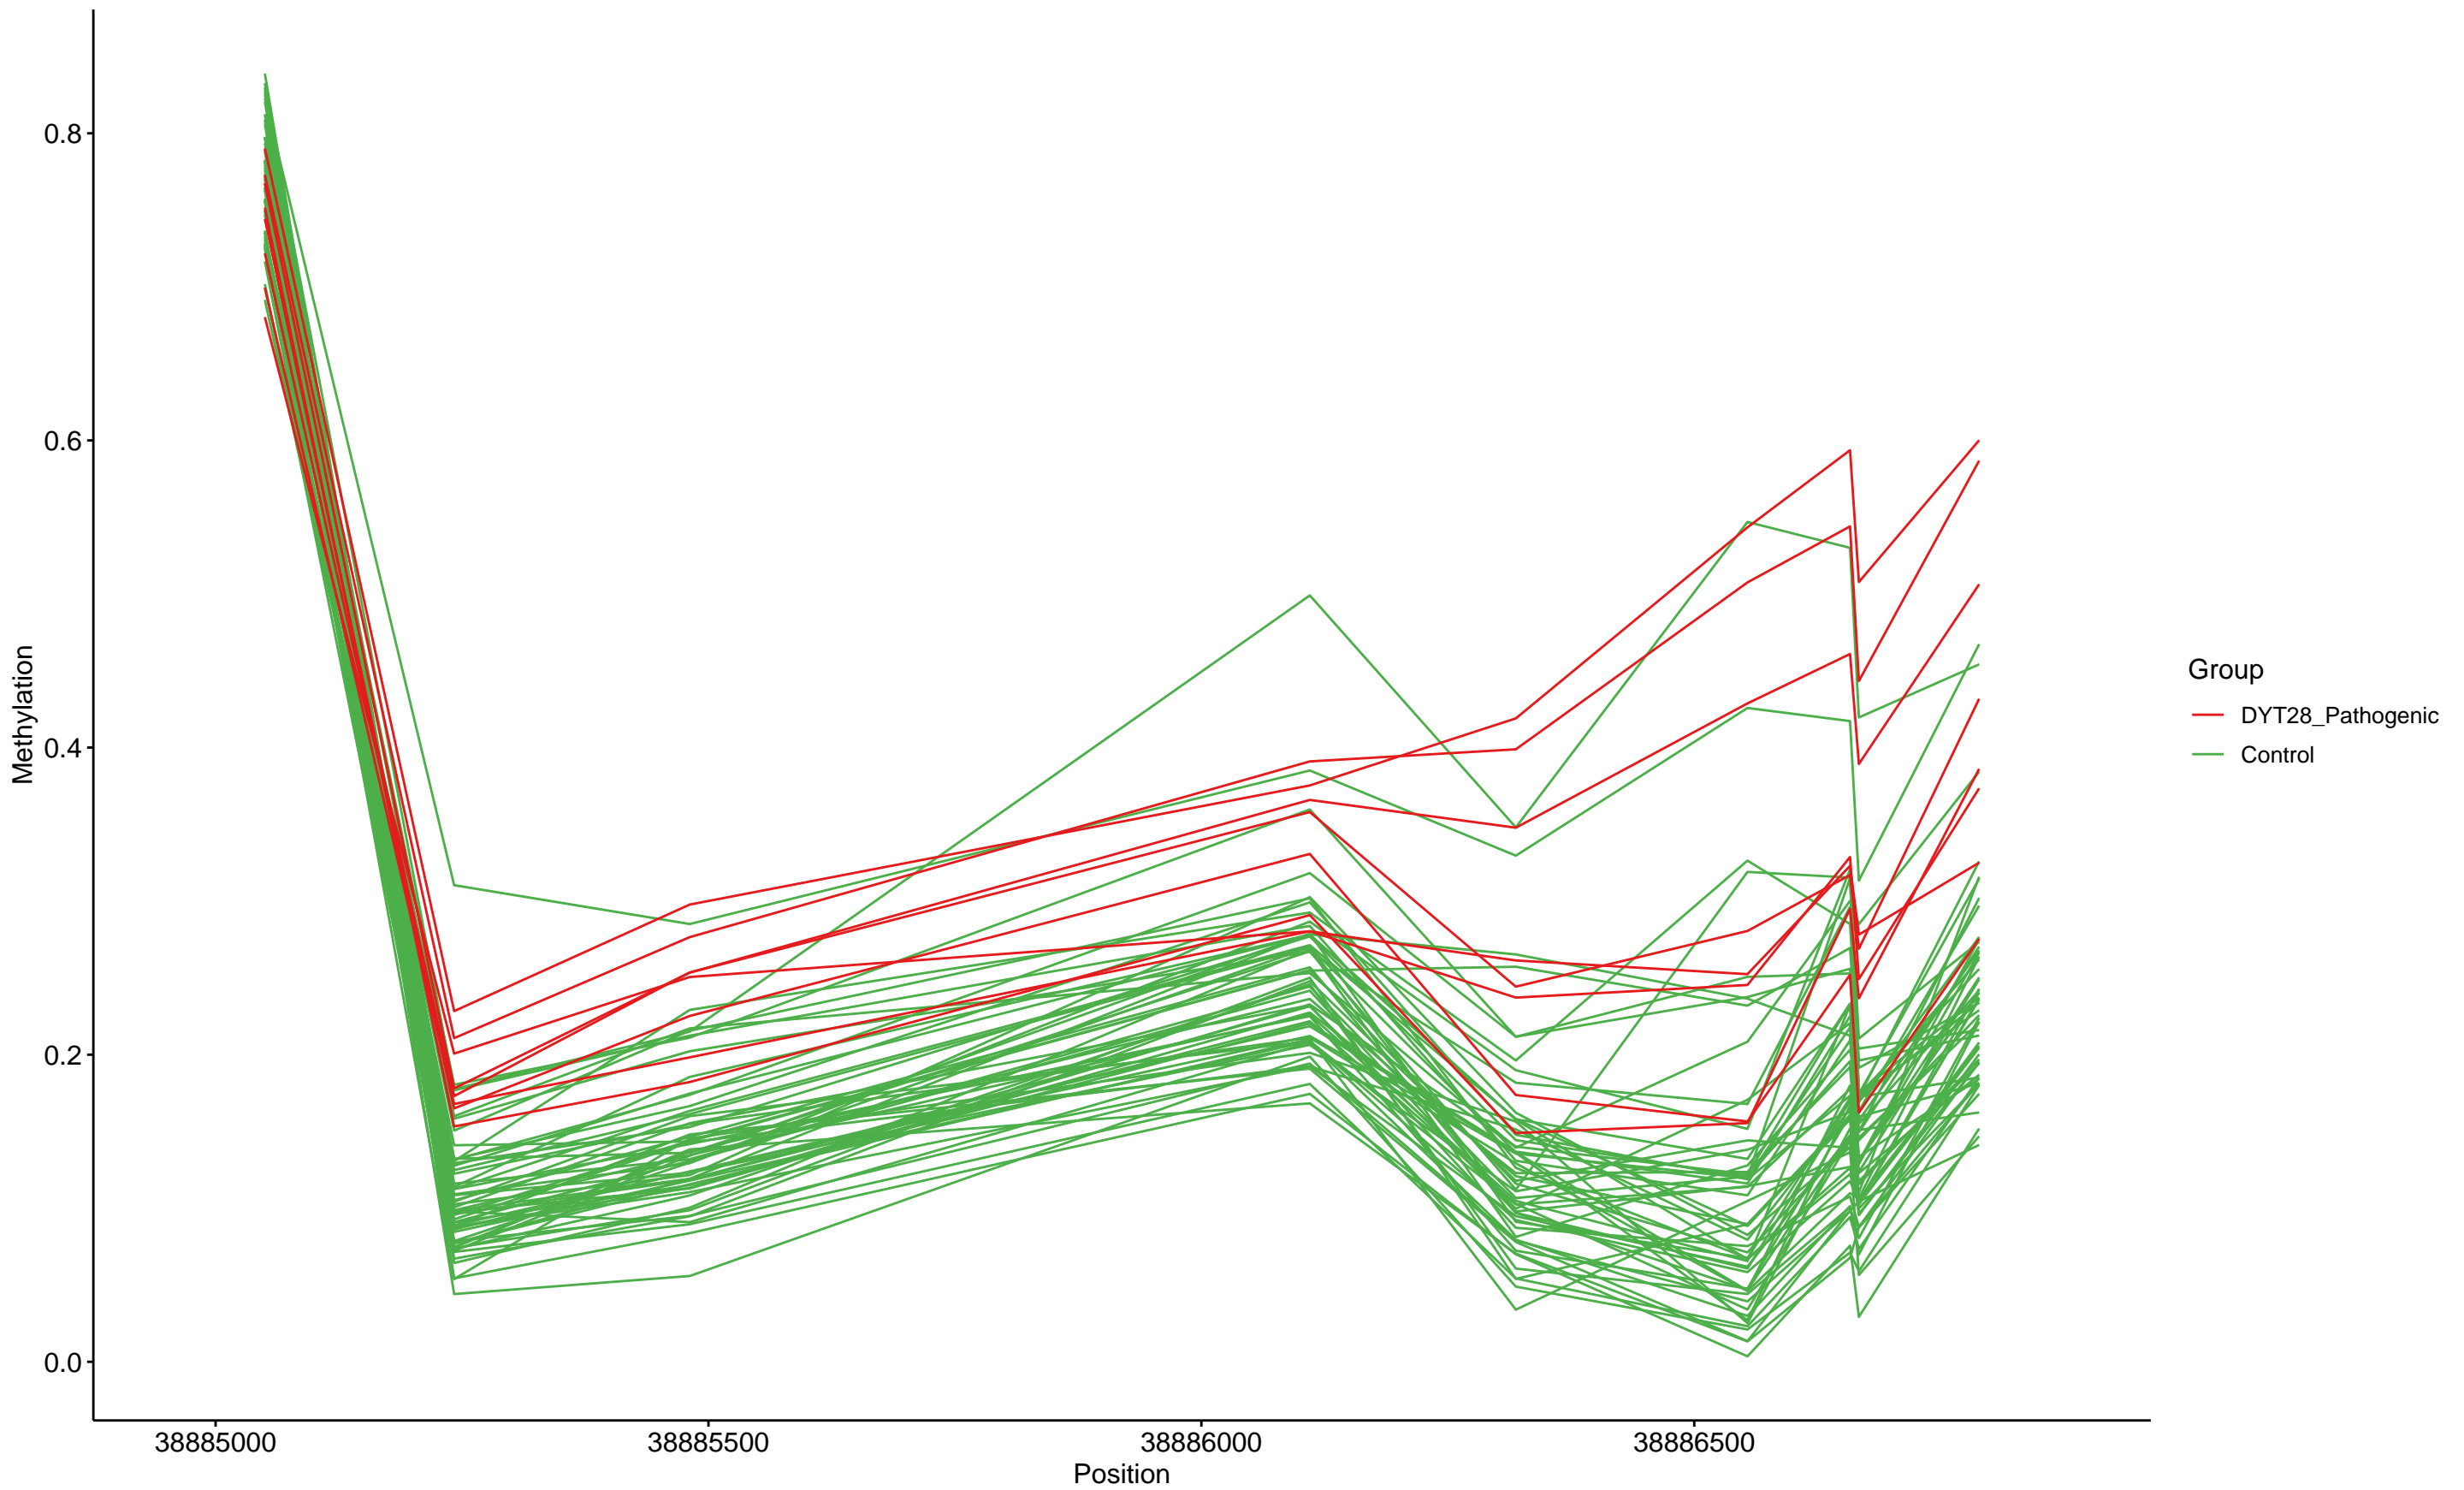

Region 123: chr4:74718978–74719306

Fisher:  $8.51057855306985e-21$

Stouffer:  $7.35730759223649e-23$

Mean difference: 0.111267564076609

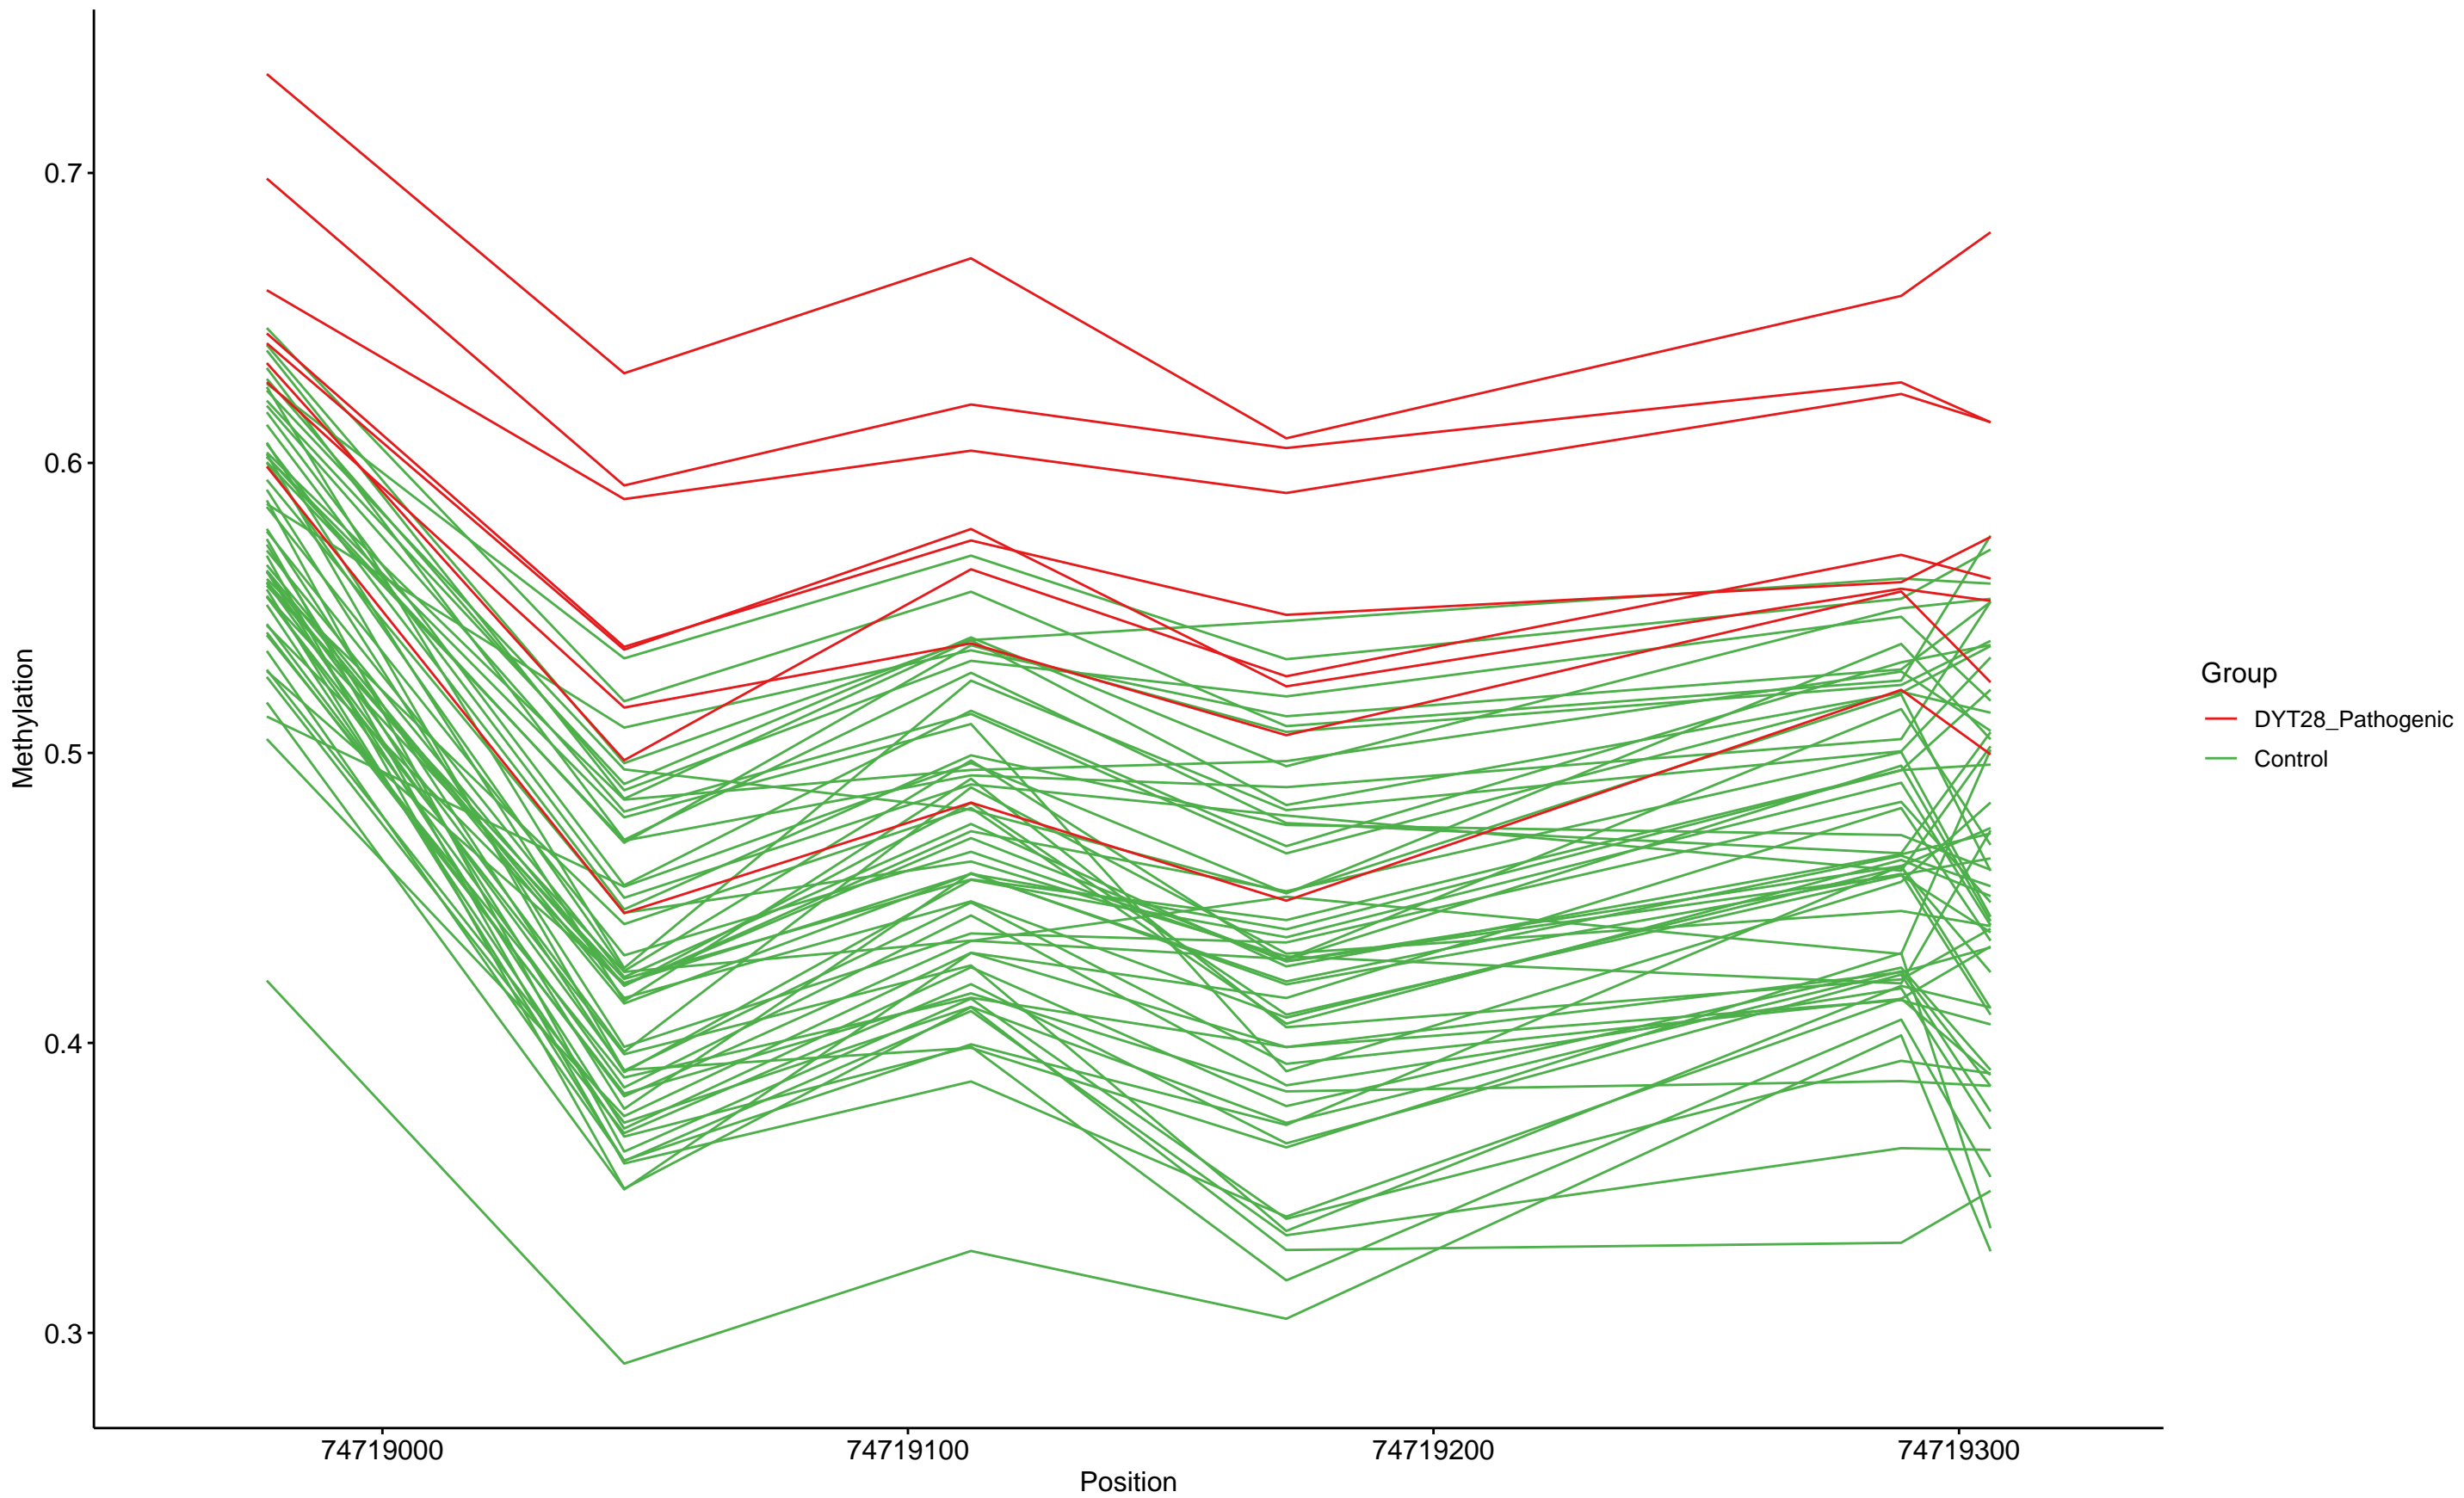



Region 124: chr19:50860534–50862121

Fisher:  $9.07643765480823e-21$

Stouffer:  $2.97510003147617e-18$

Mean difference: 0.124610158873407

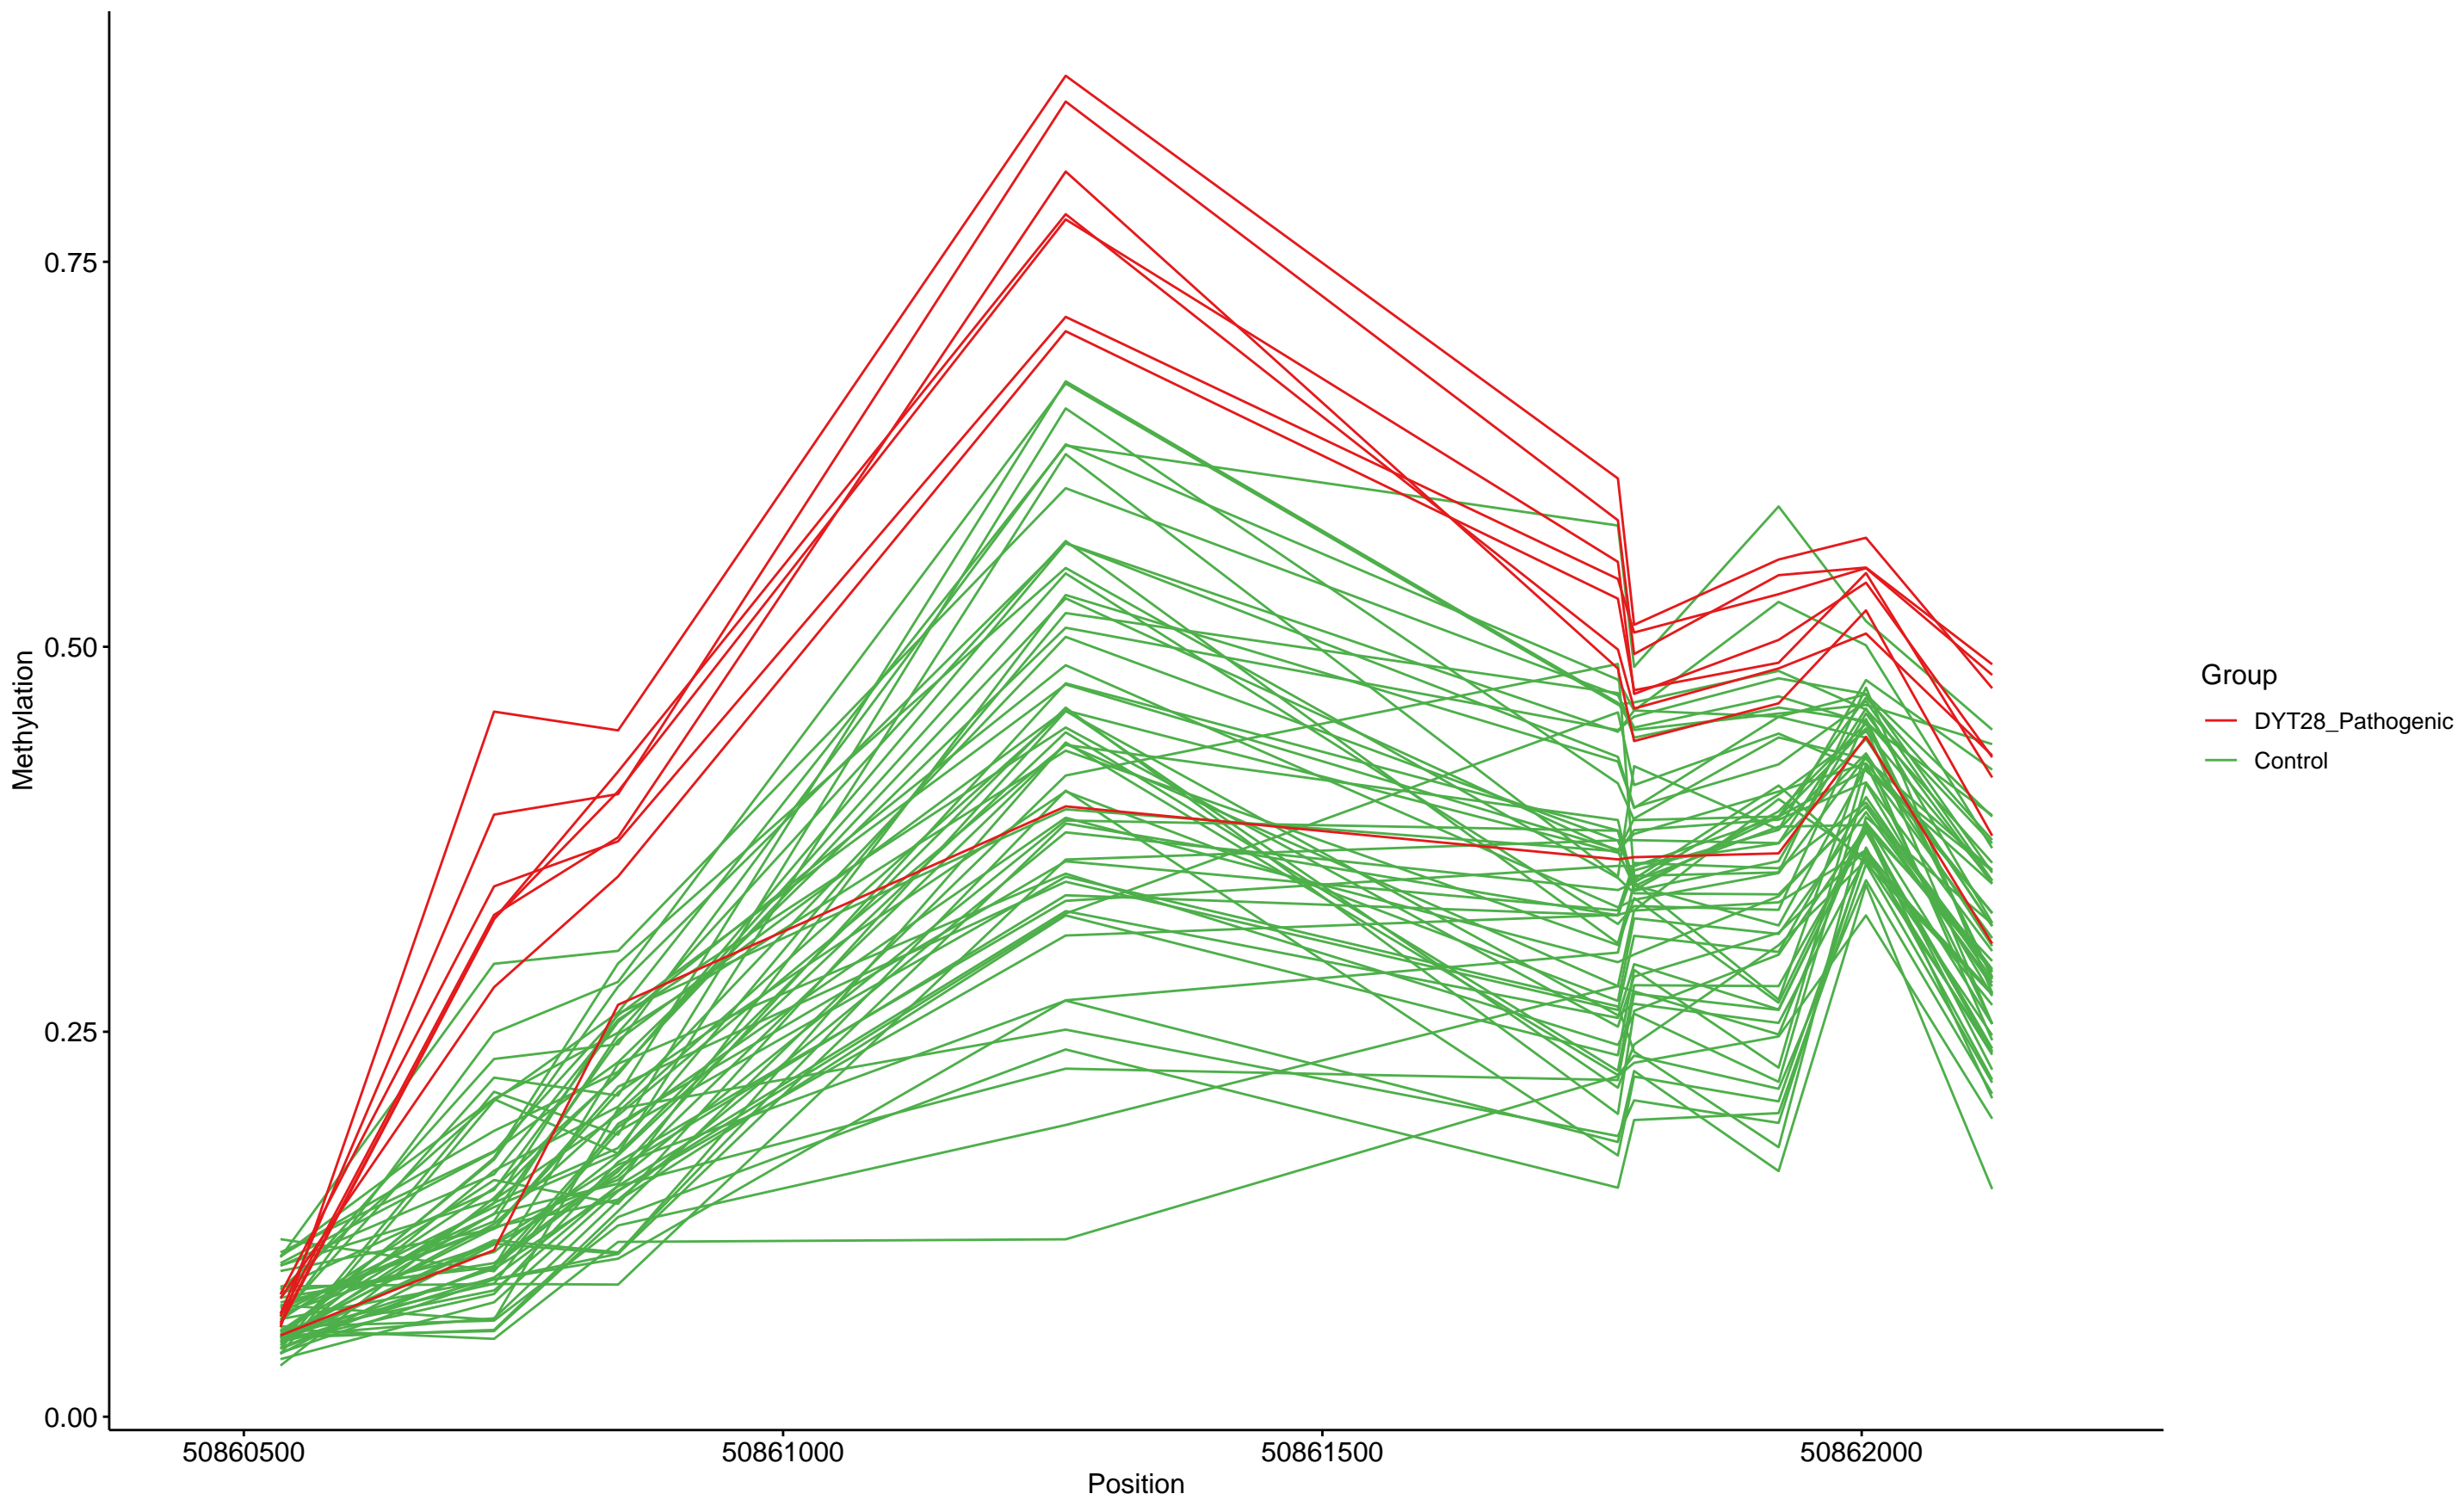



Region 125: chr1:157164556-157165335

Fisher: 1.09840834841348e-20

Stouffer: 1.51256863394308e-20

Mean difference: 0.103771163170032

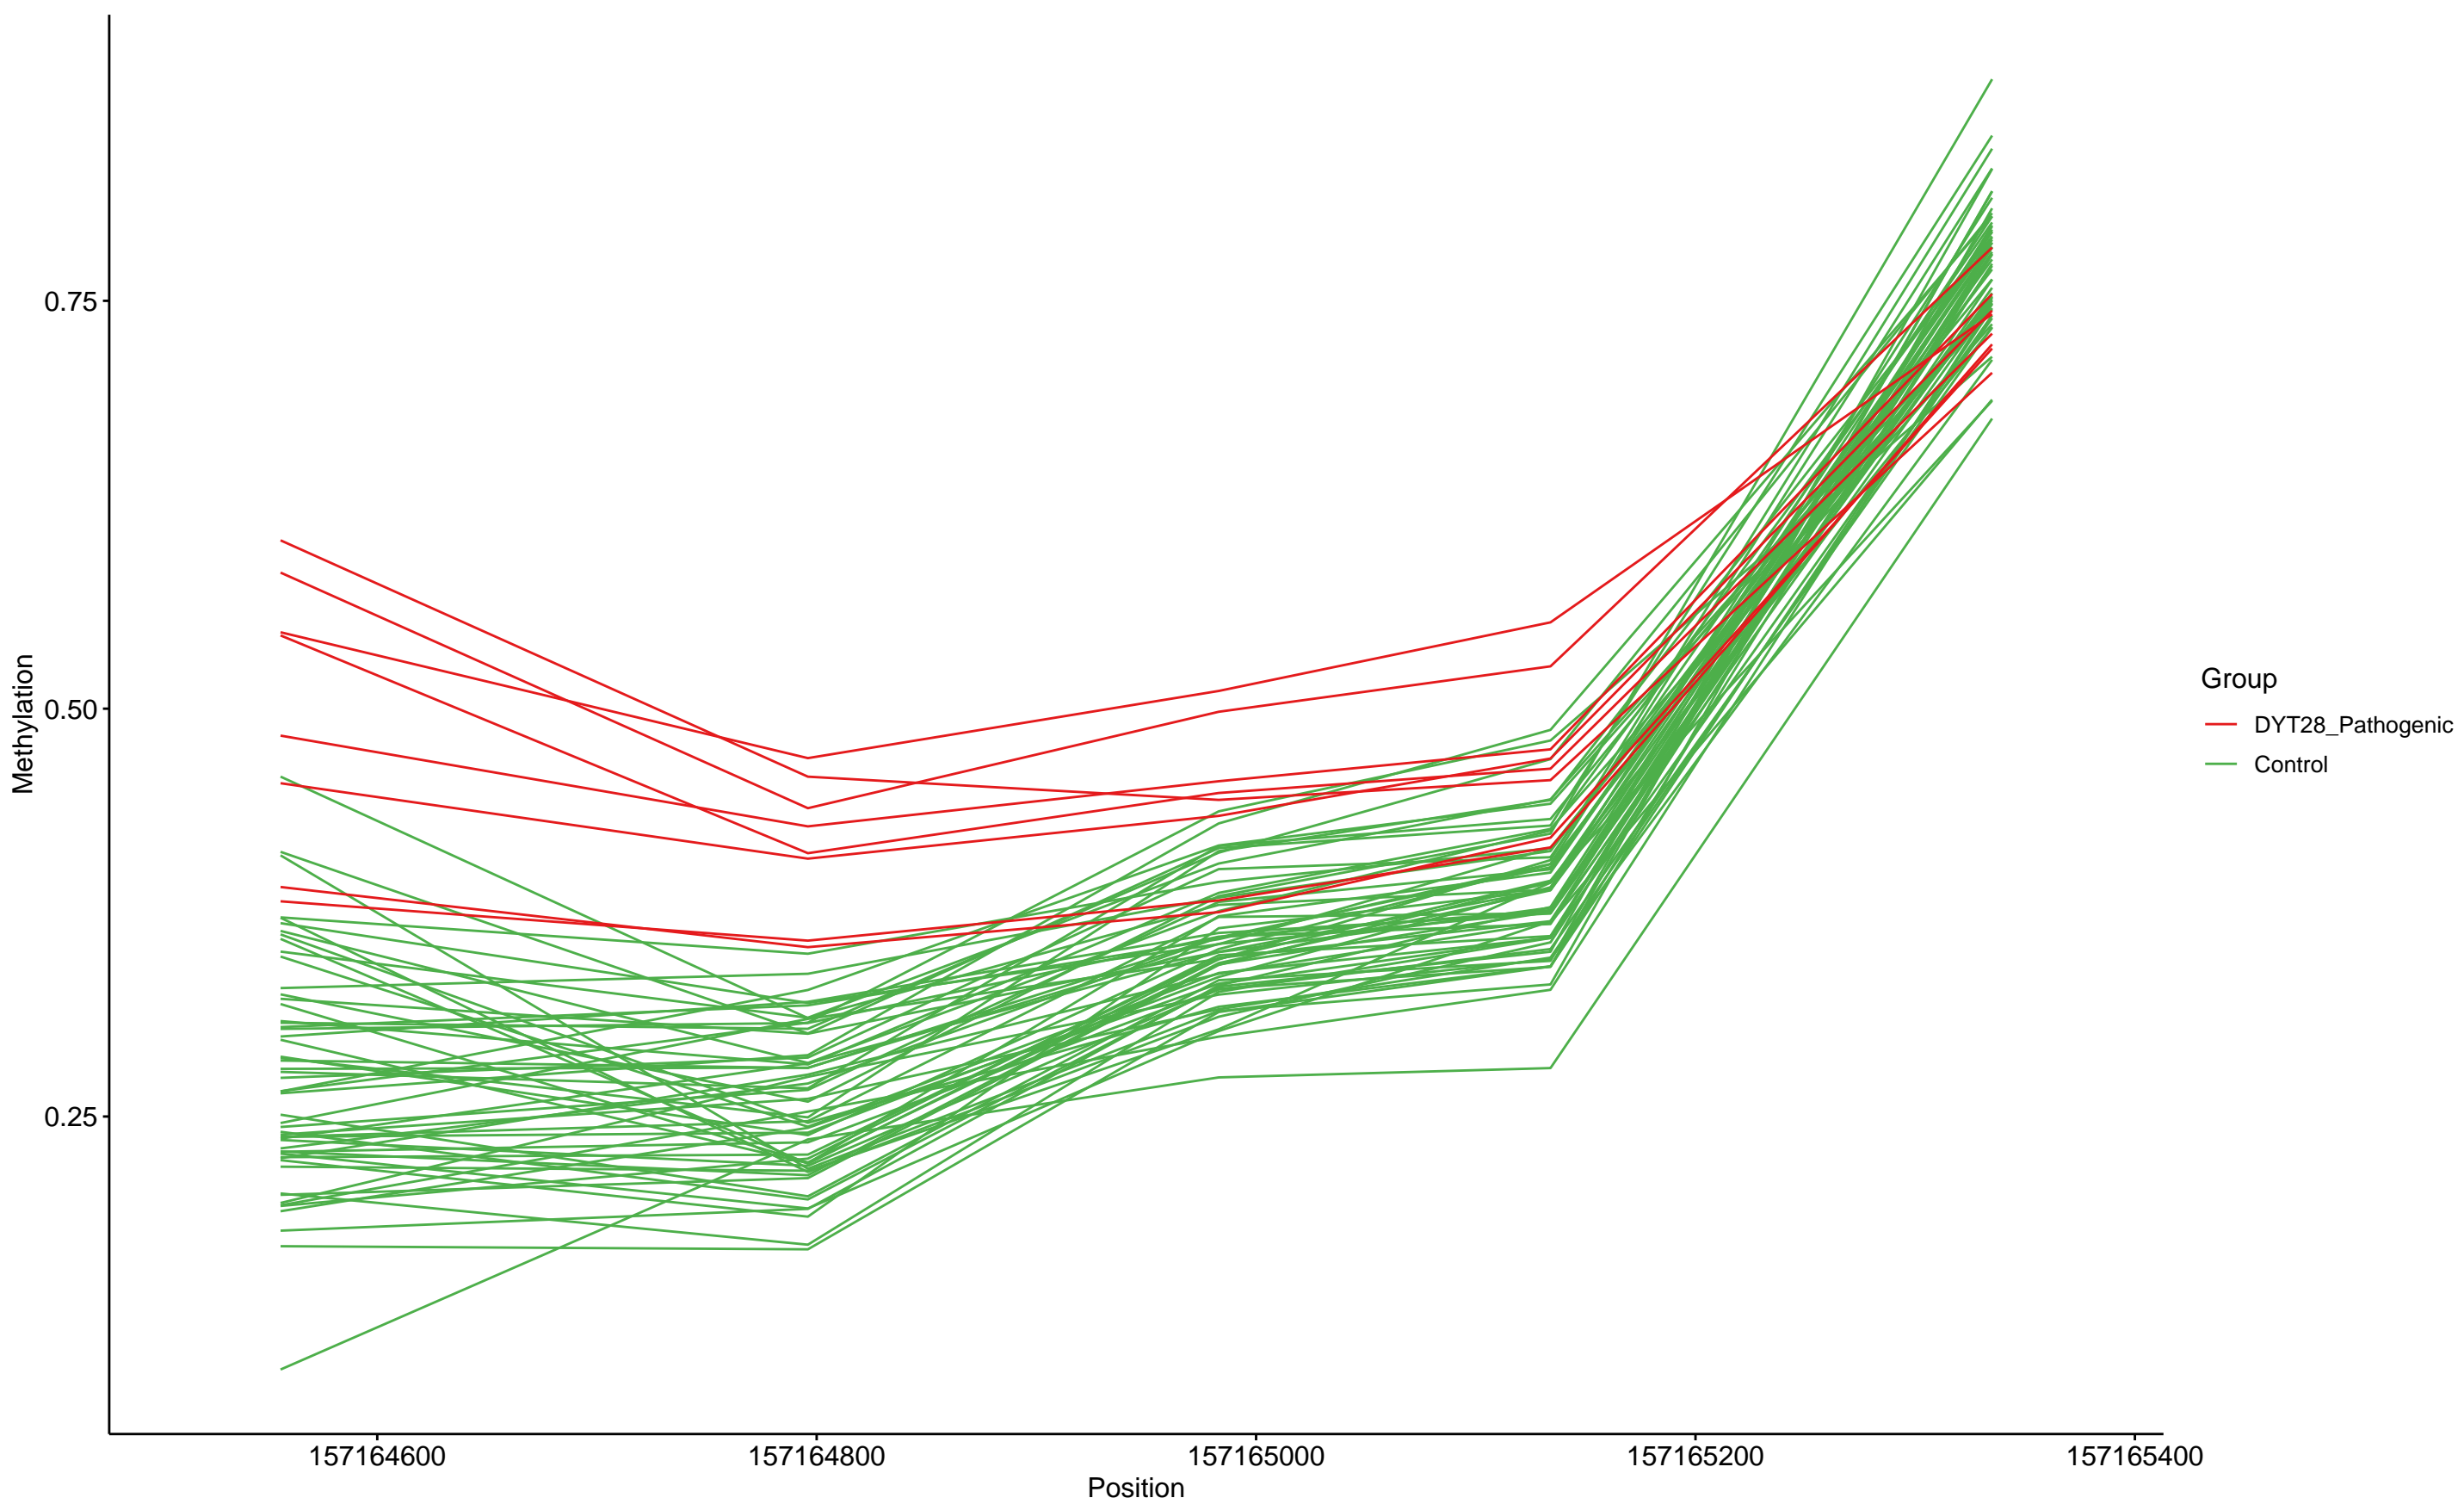

Region 126: chr5:8457124–8458089

Fisher:  $1.46775030430635e-20$

Stouffer:  $3.23213005859517e-17$

Mean difference: 0.14419797351125

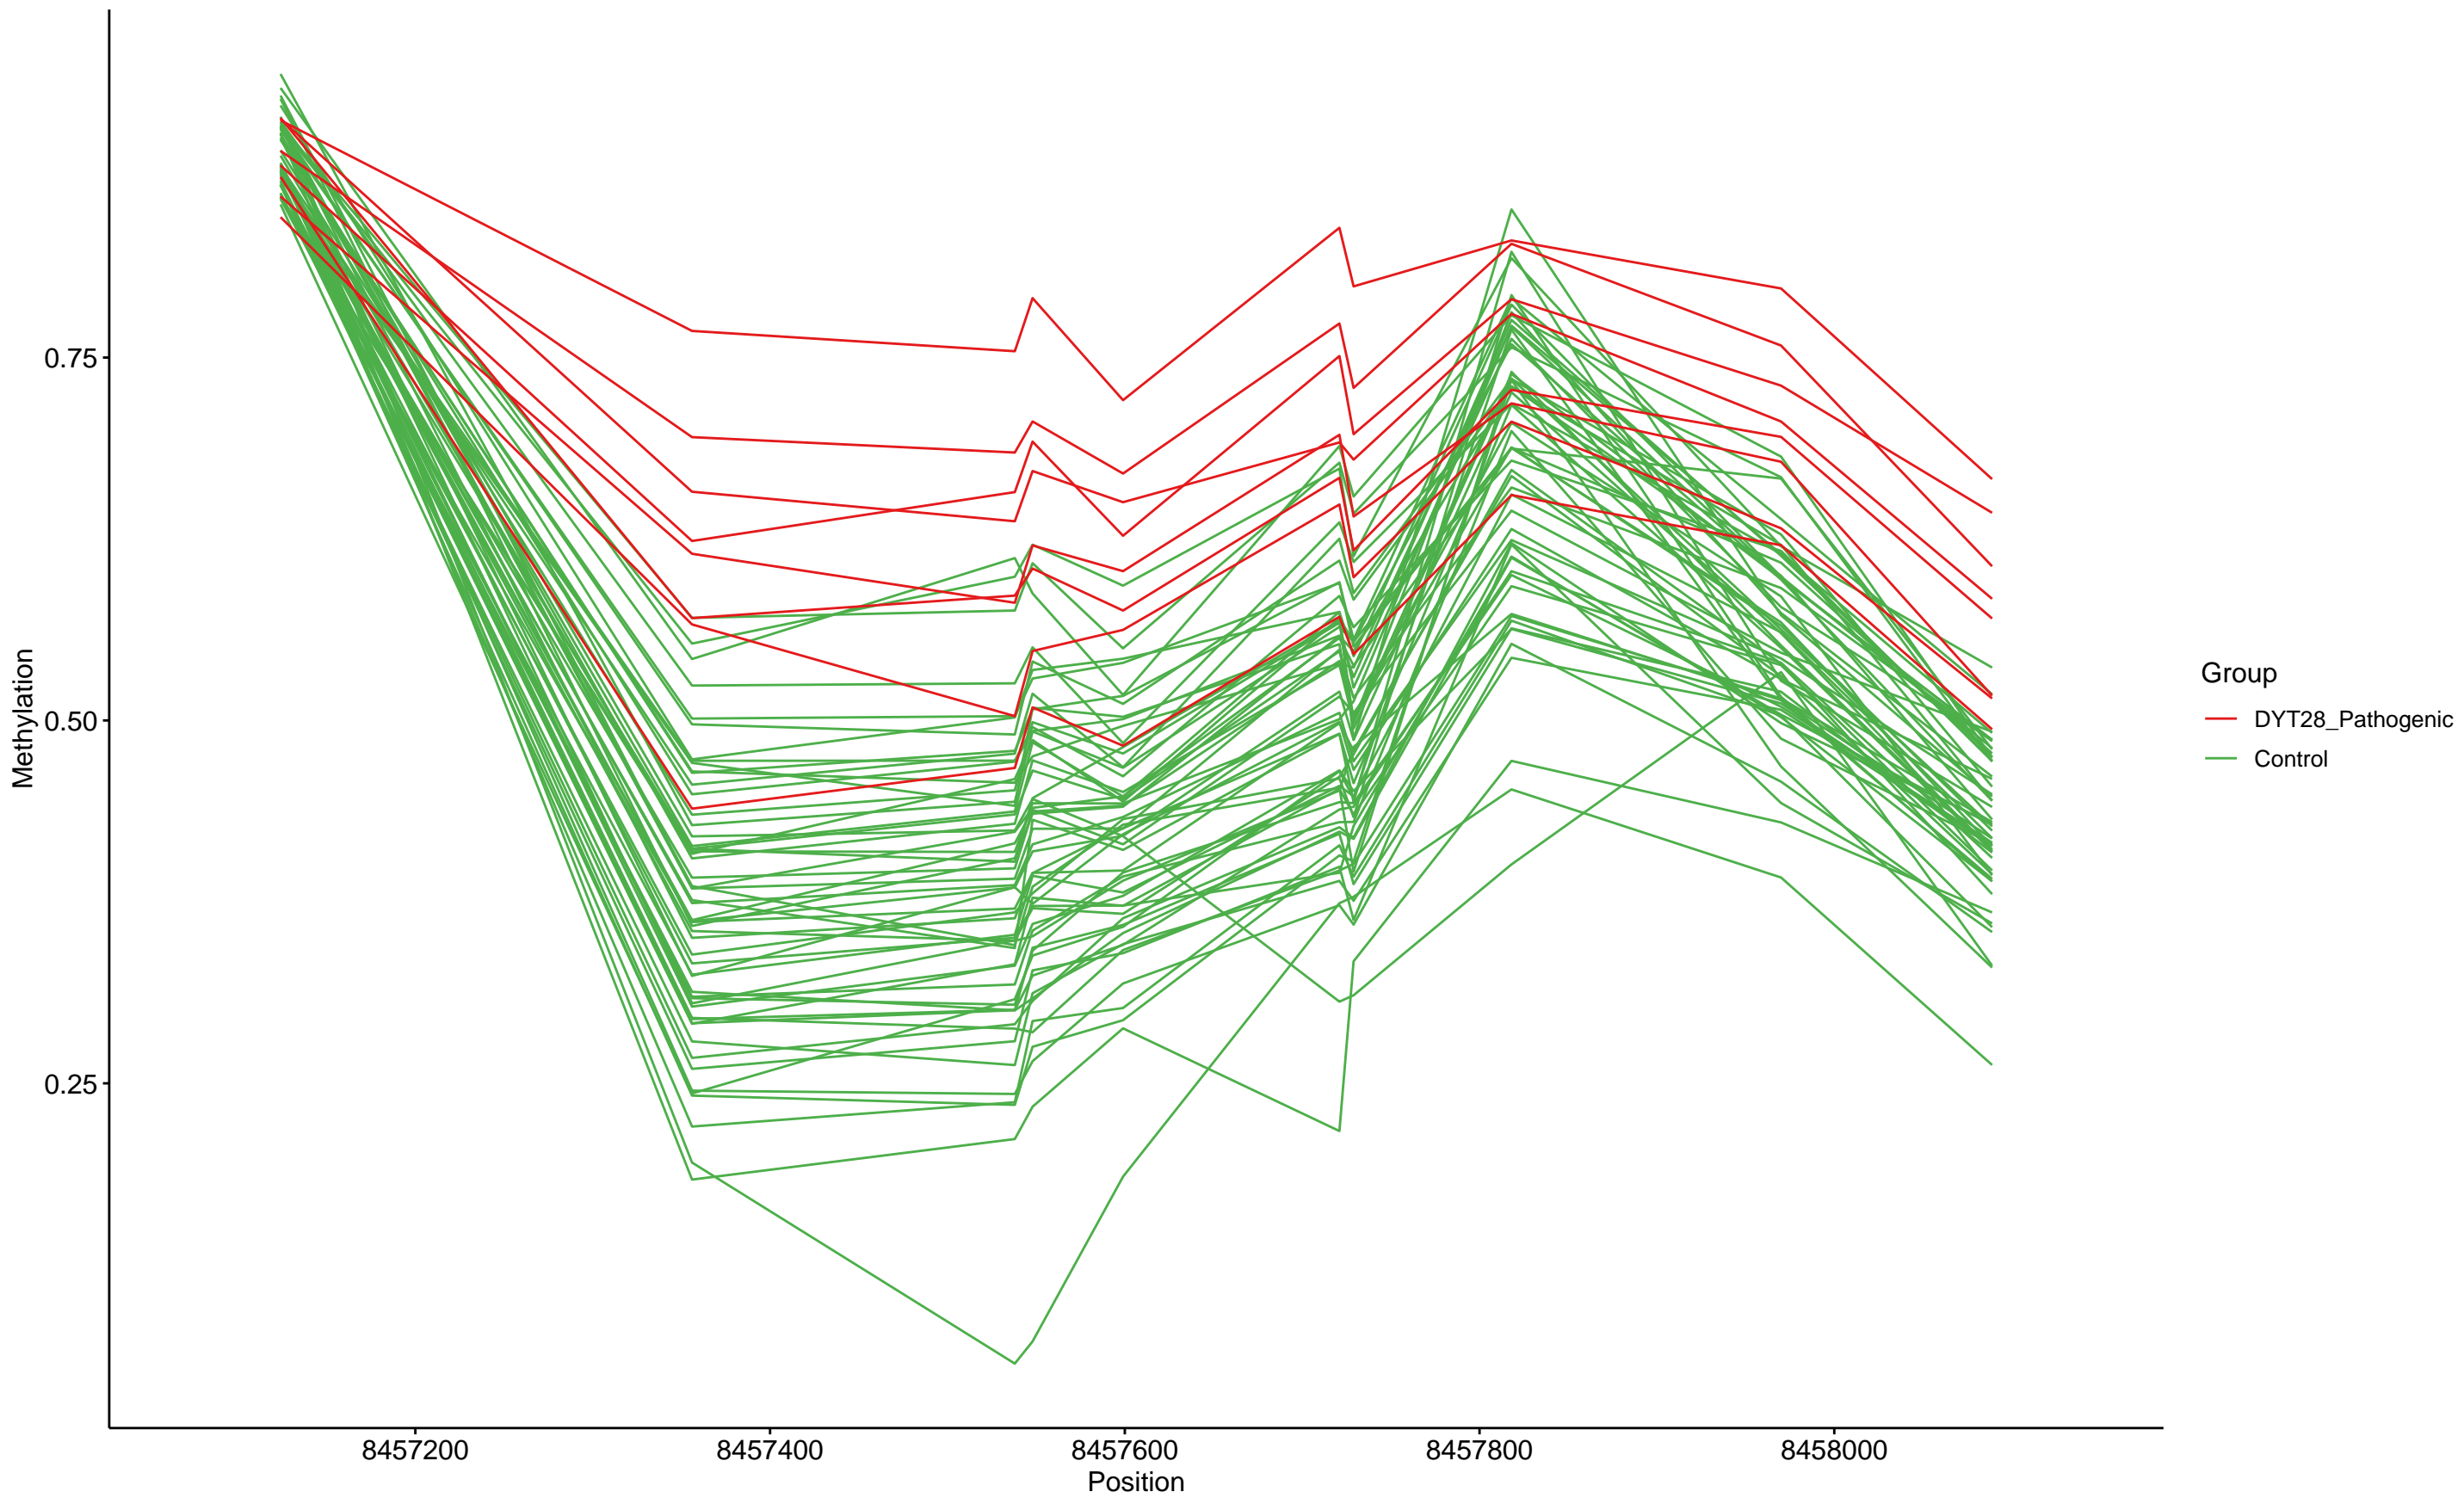

Region 127: chr2:129659018–129659946

Fisher:  $7.72493434850349e-20$

Stouffer:  $6.06931130431537e-21$

Mean difference: 0.124502847827426

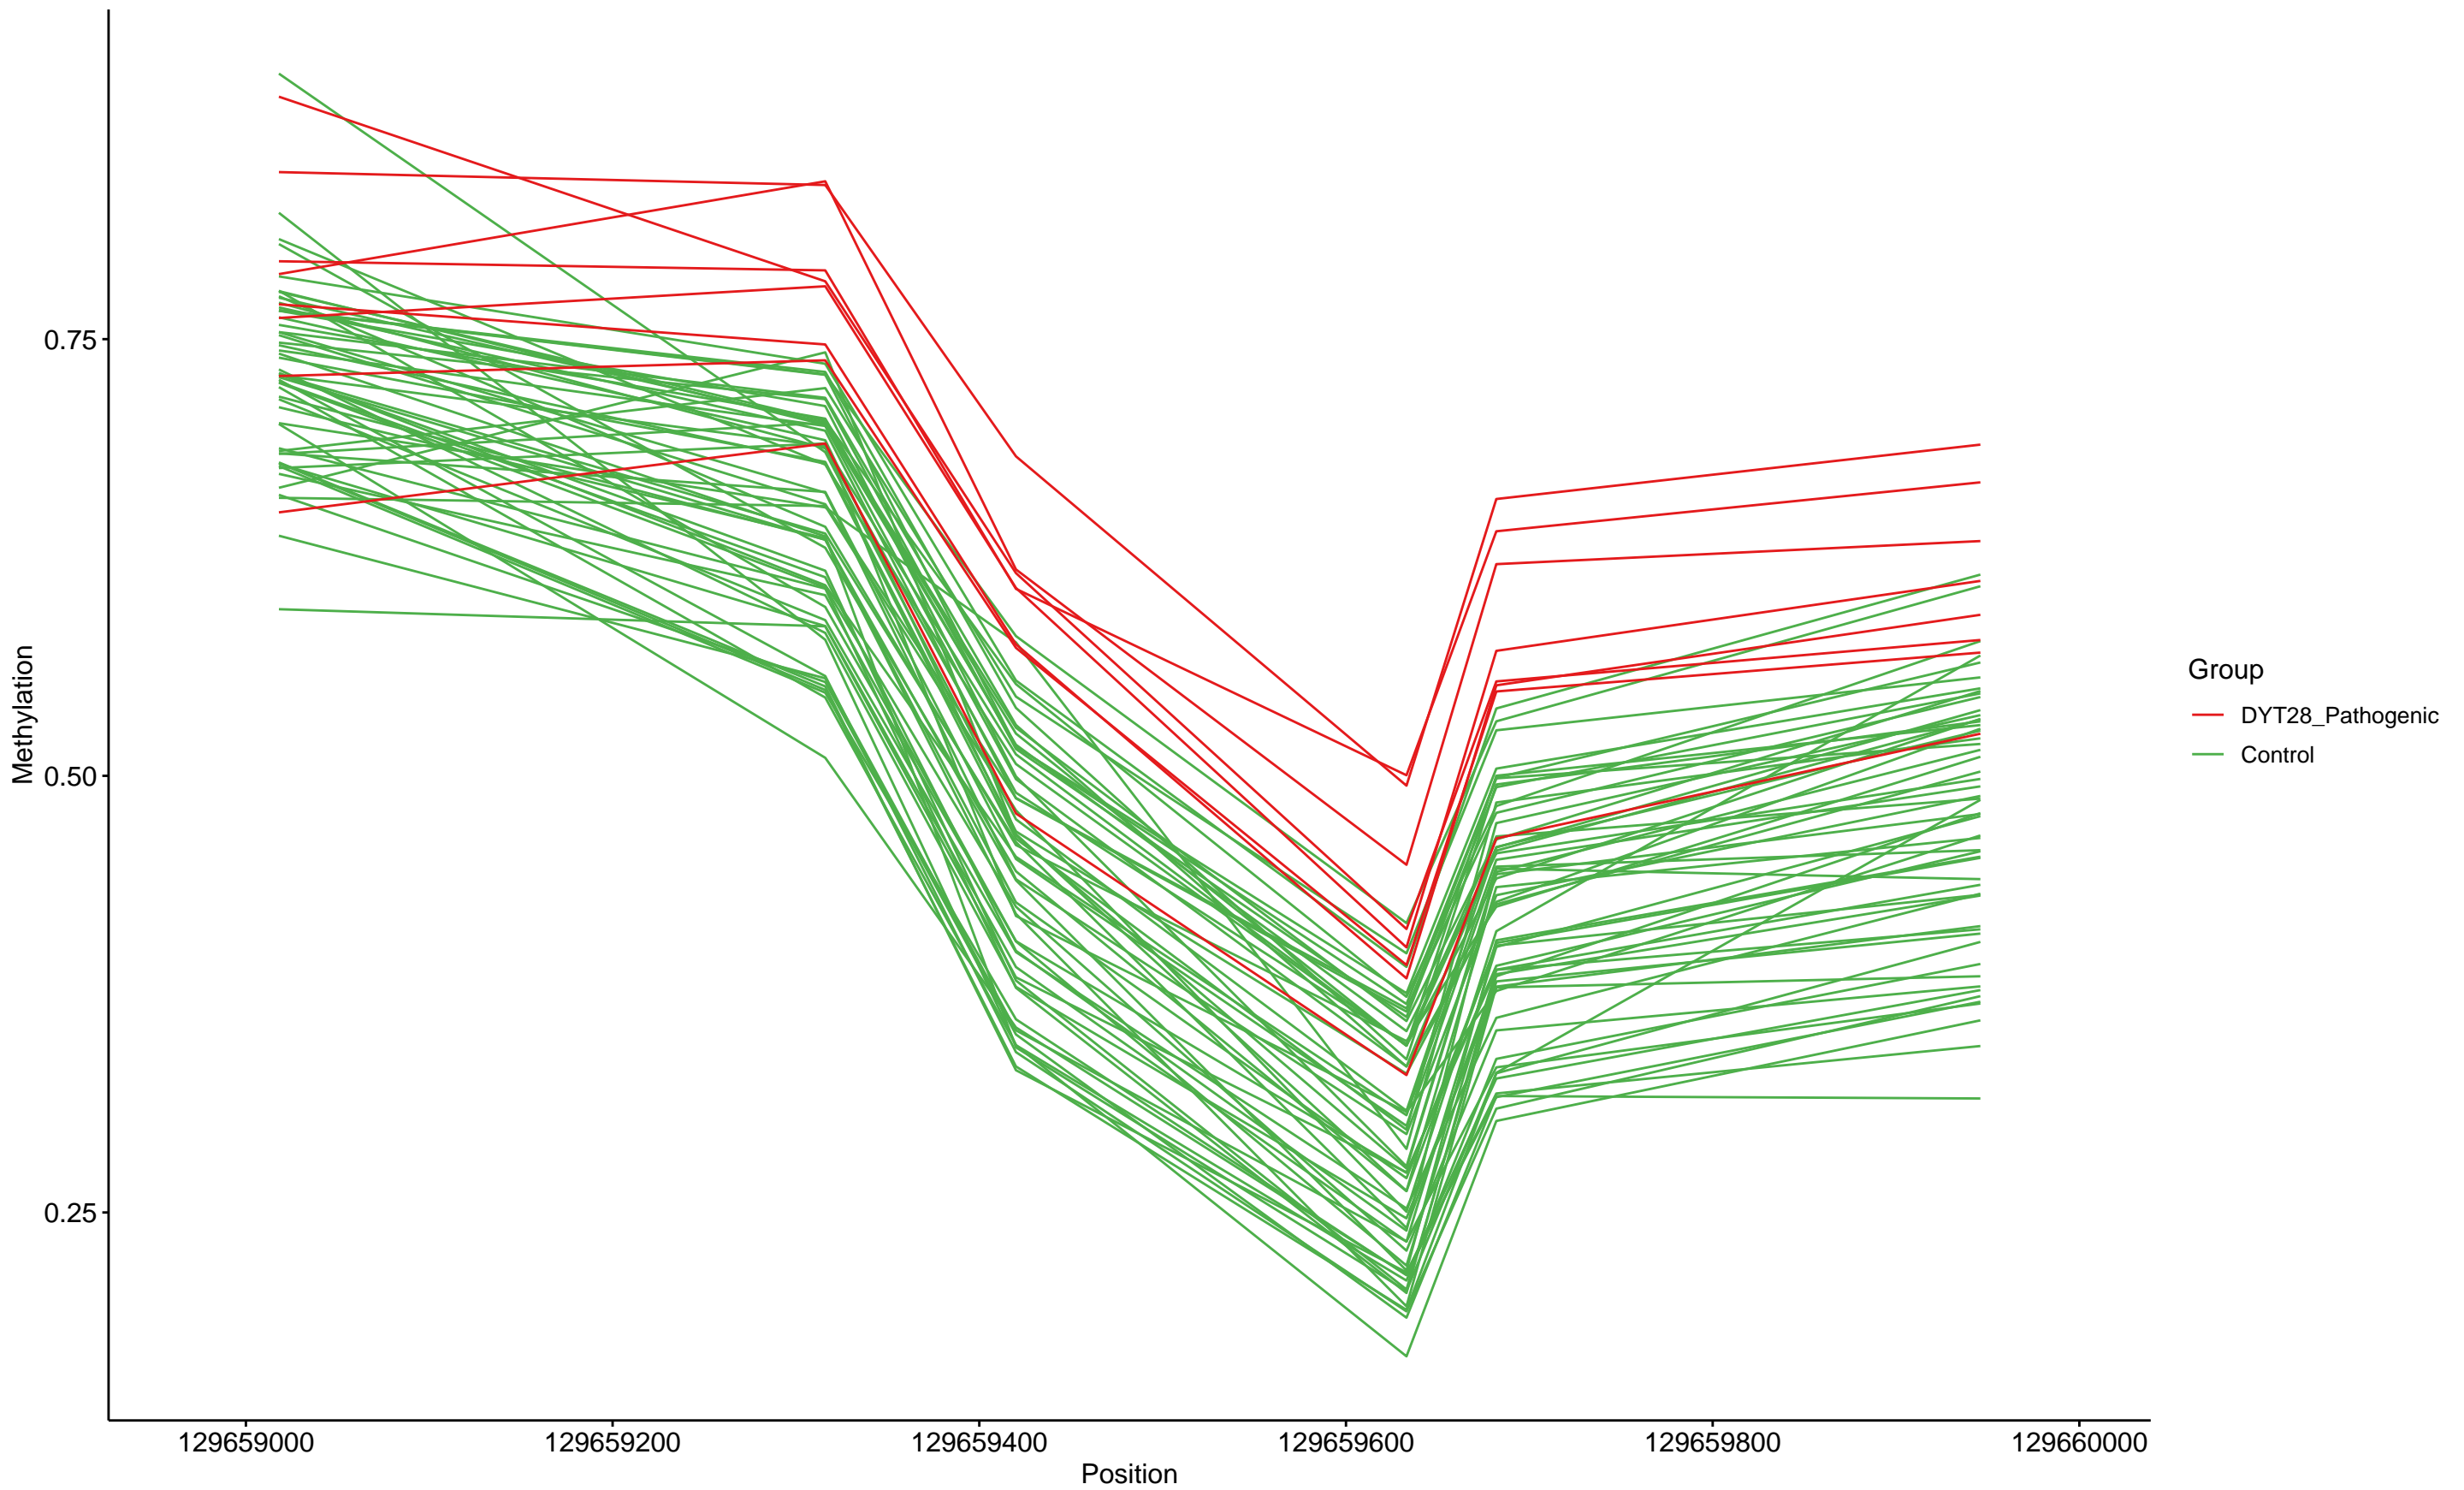



Region 128: chr5:132155233–132155965

Fisher:  $1.75911373657706 \times 10^{-17}$

Stouffer:  $2.23231112090647 \times 10^{-18}$

Mean difference: 0.115266245040314

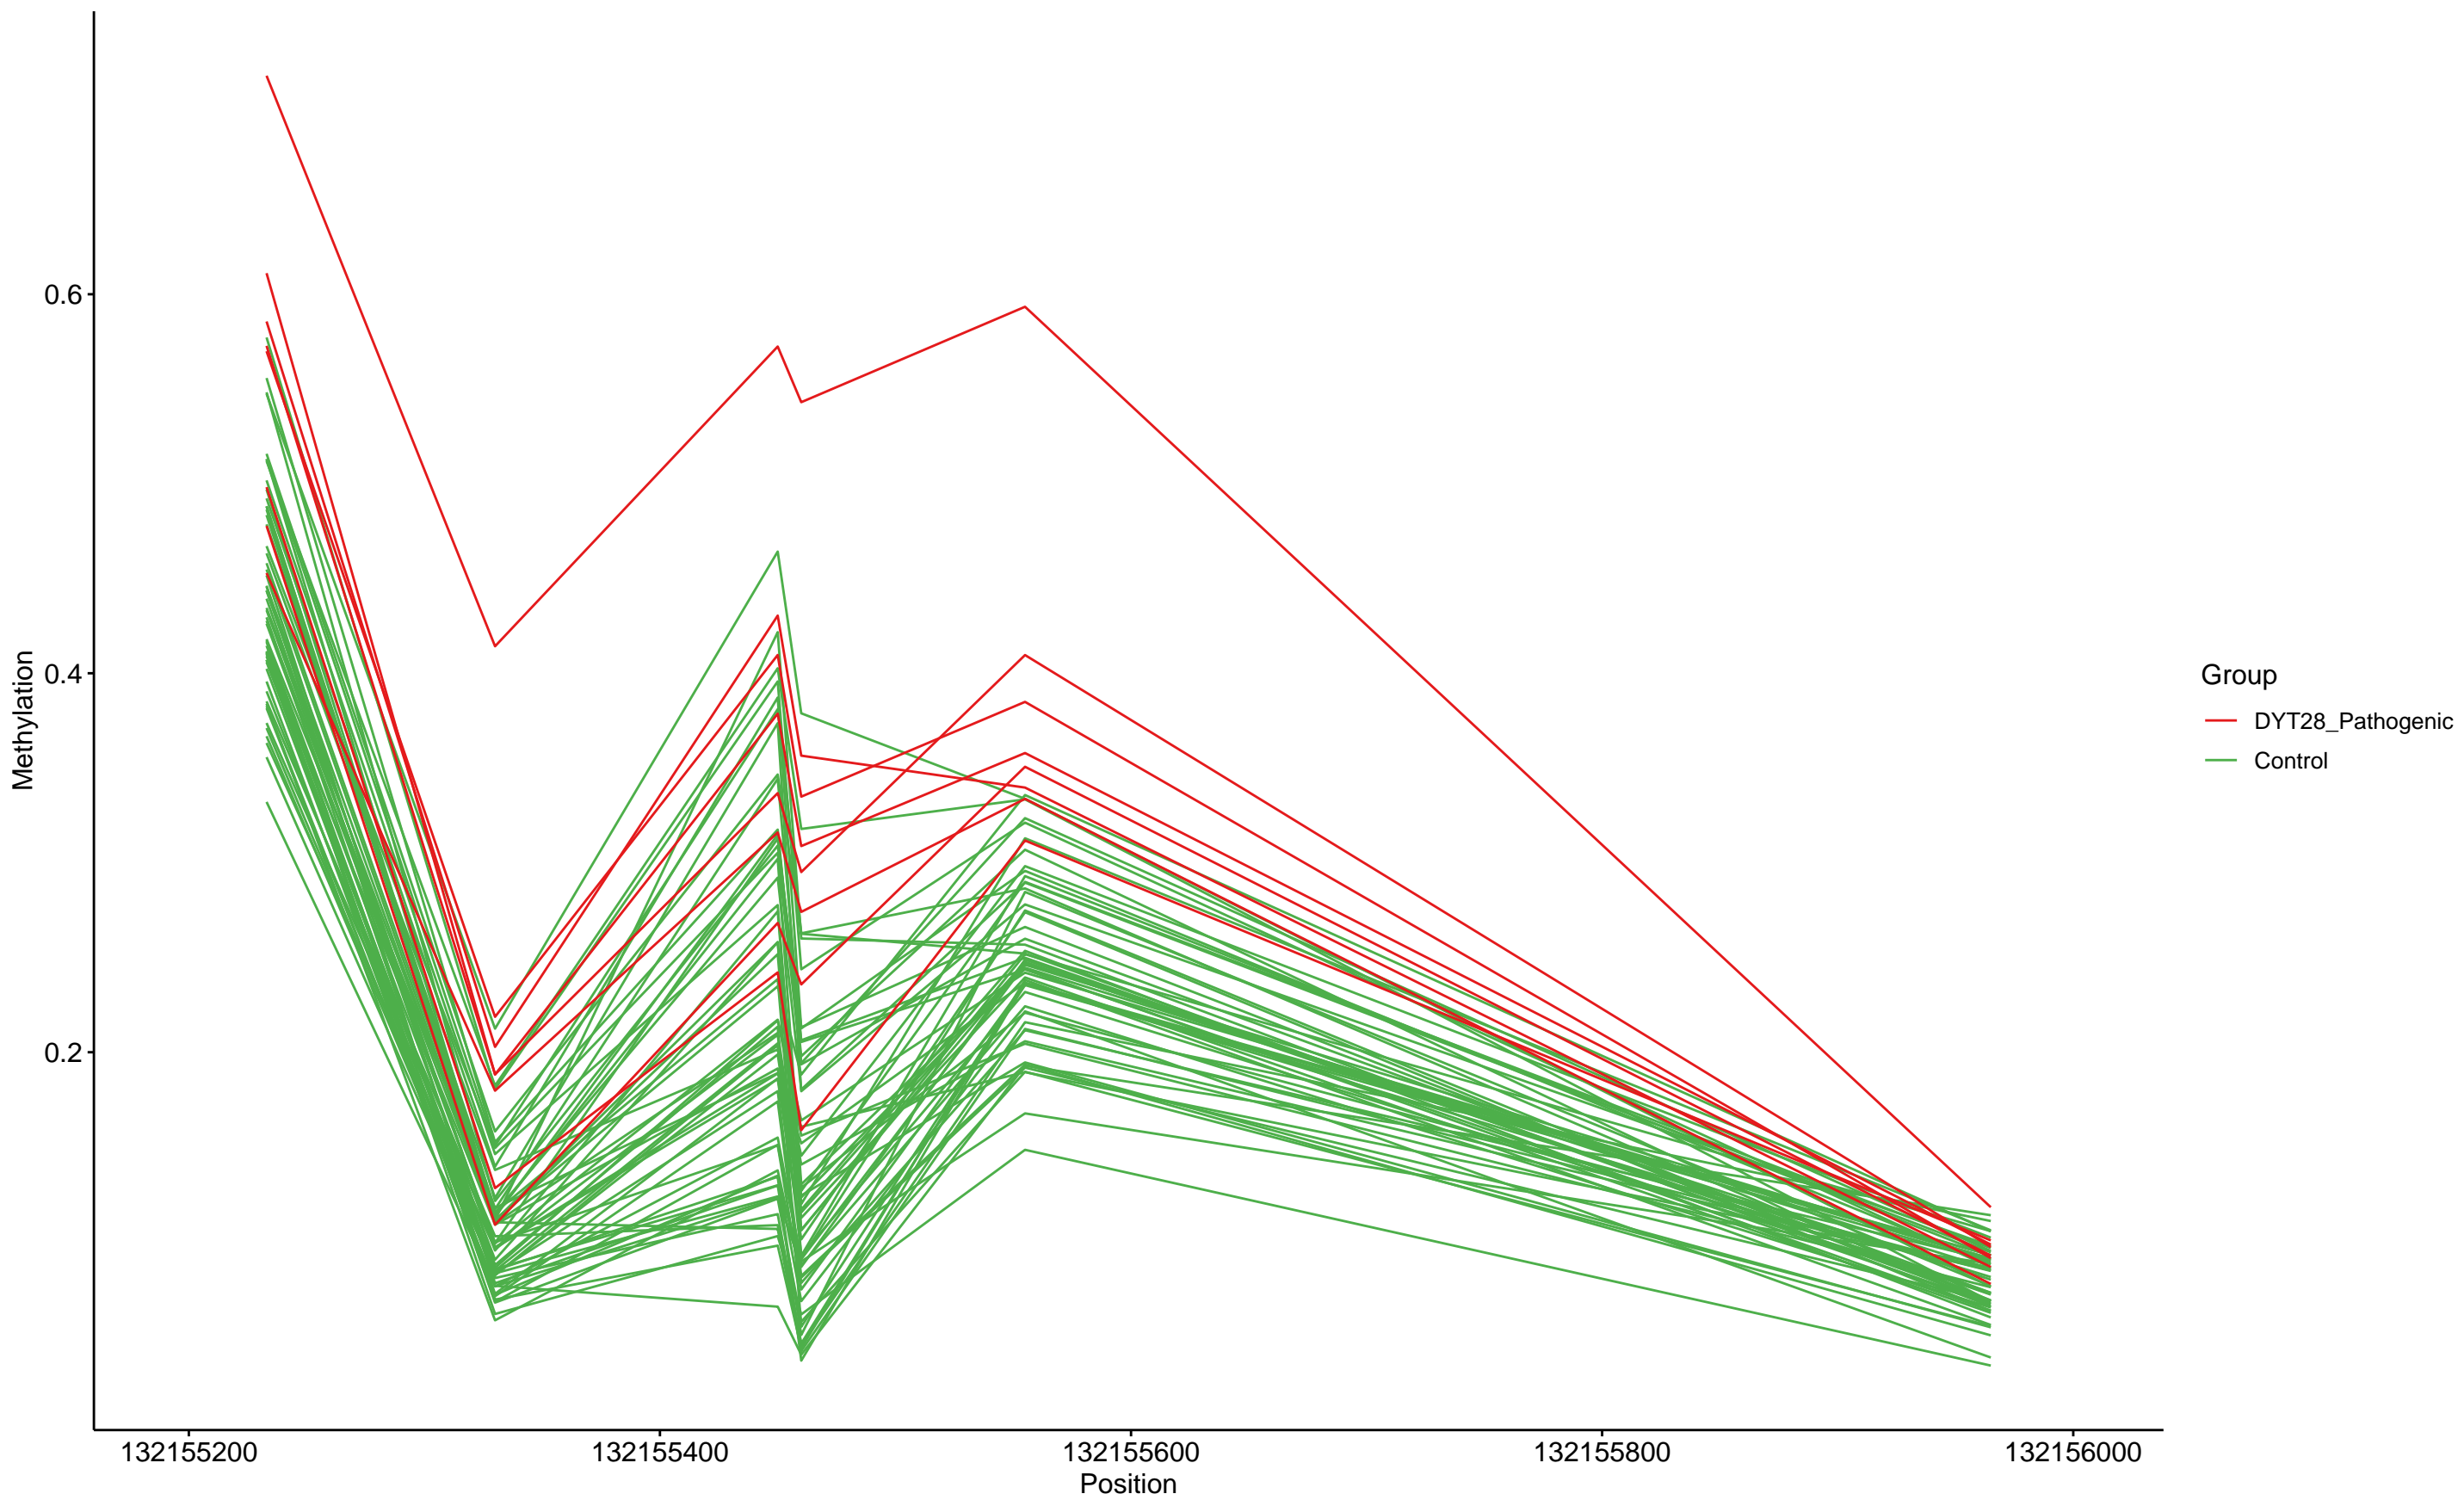



Region 129: chr6:168501903–168503473

Fisher:  $2.28549616715329e-17$

Stouffer:  $1.52459800412595e-16$

Mean difference: 0.124531489171388

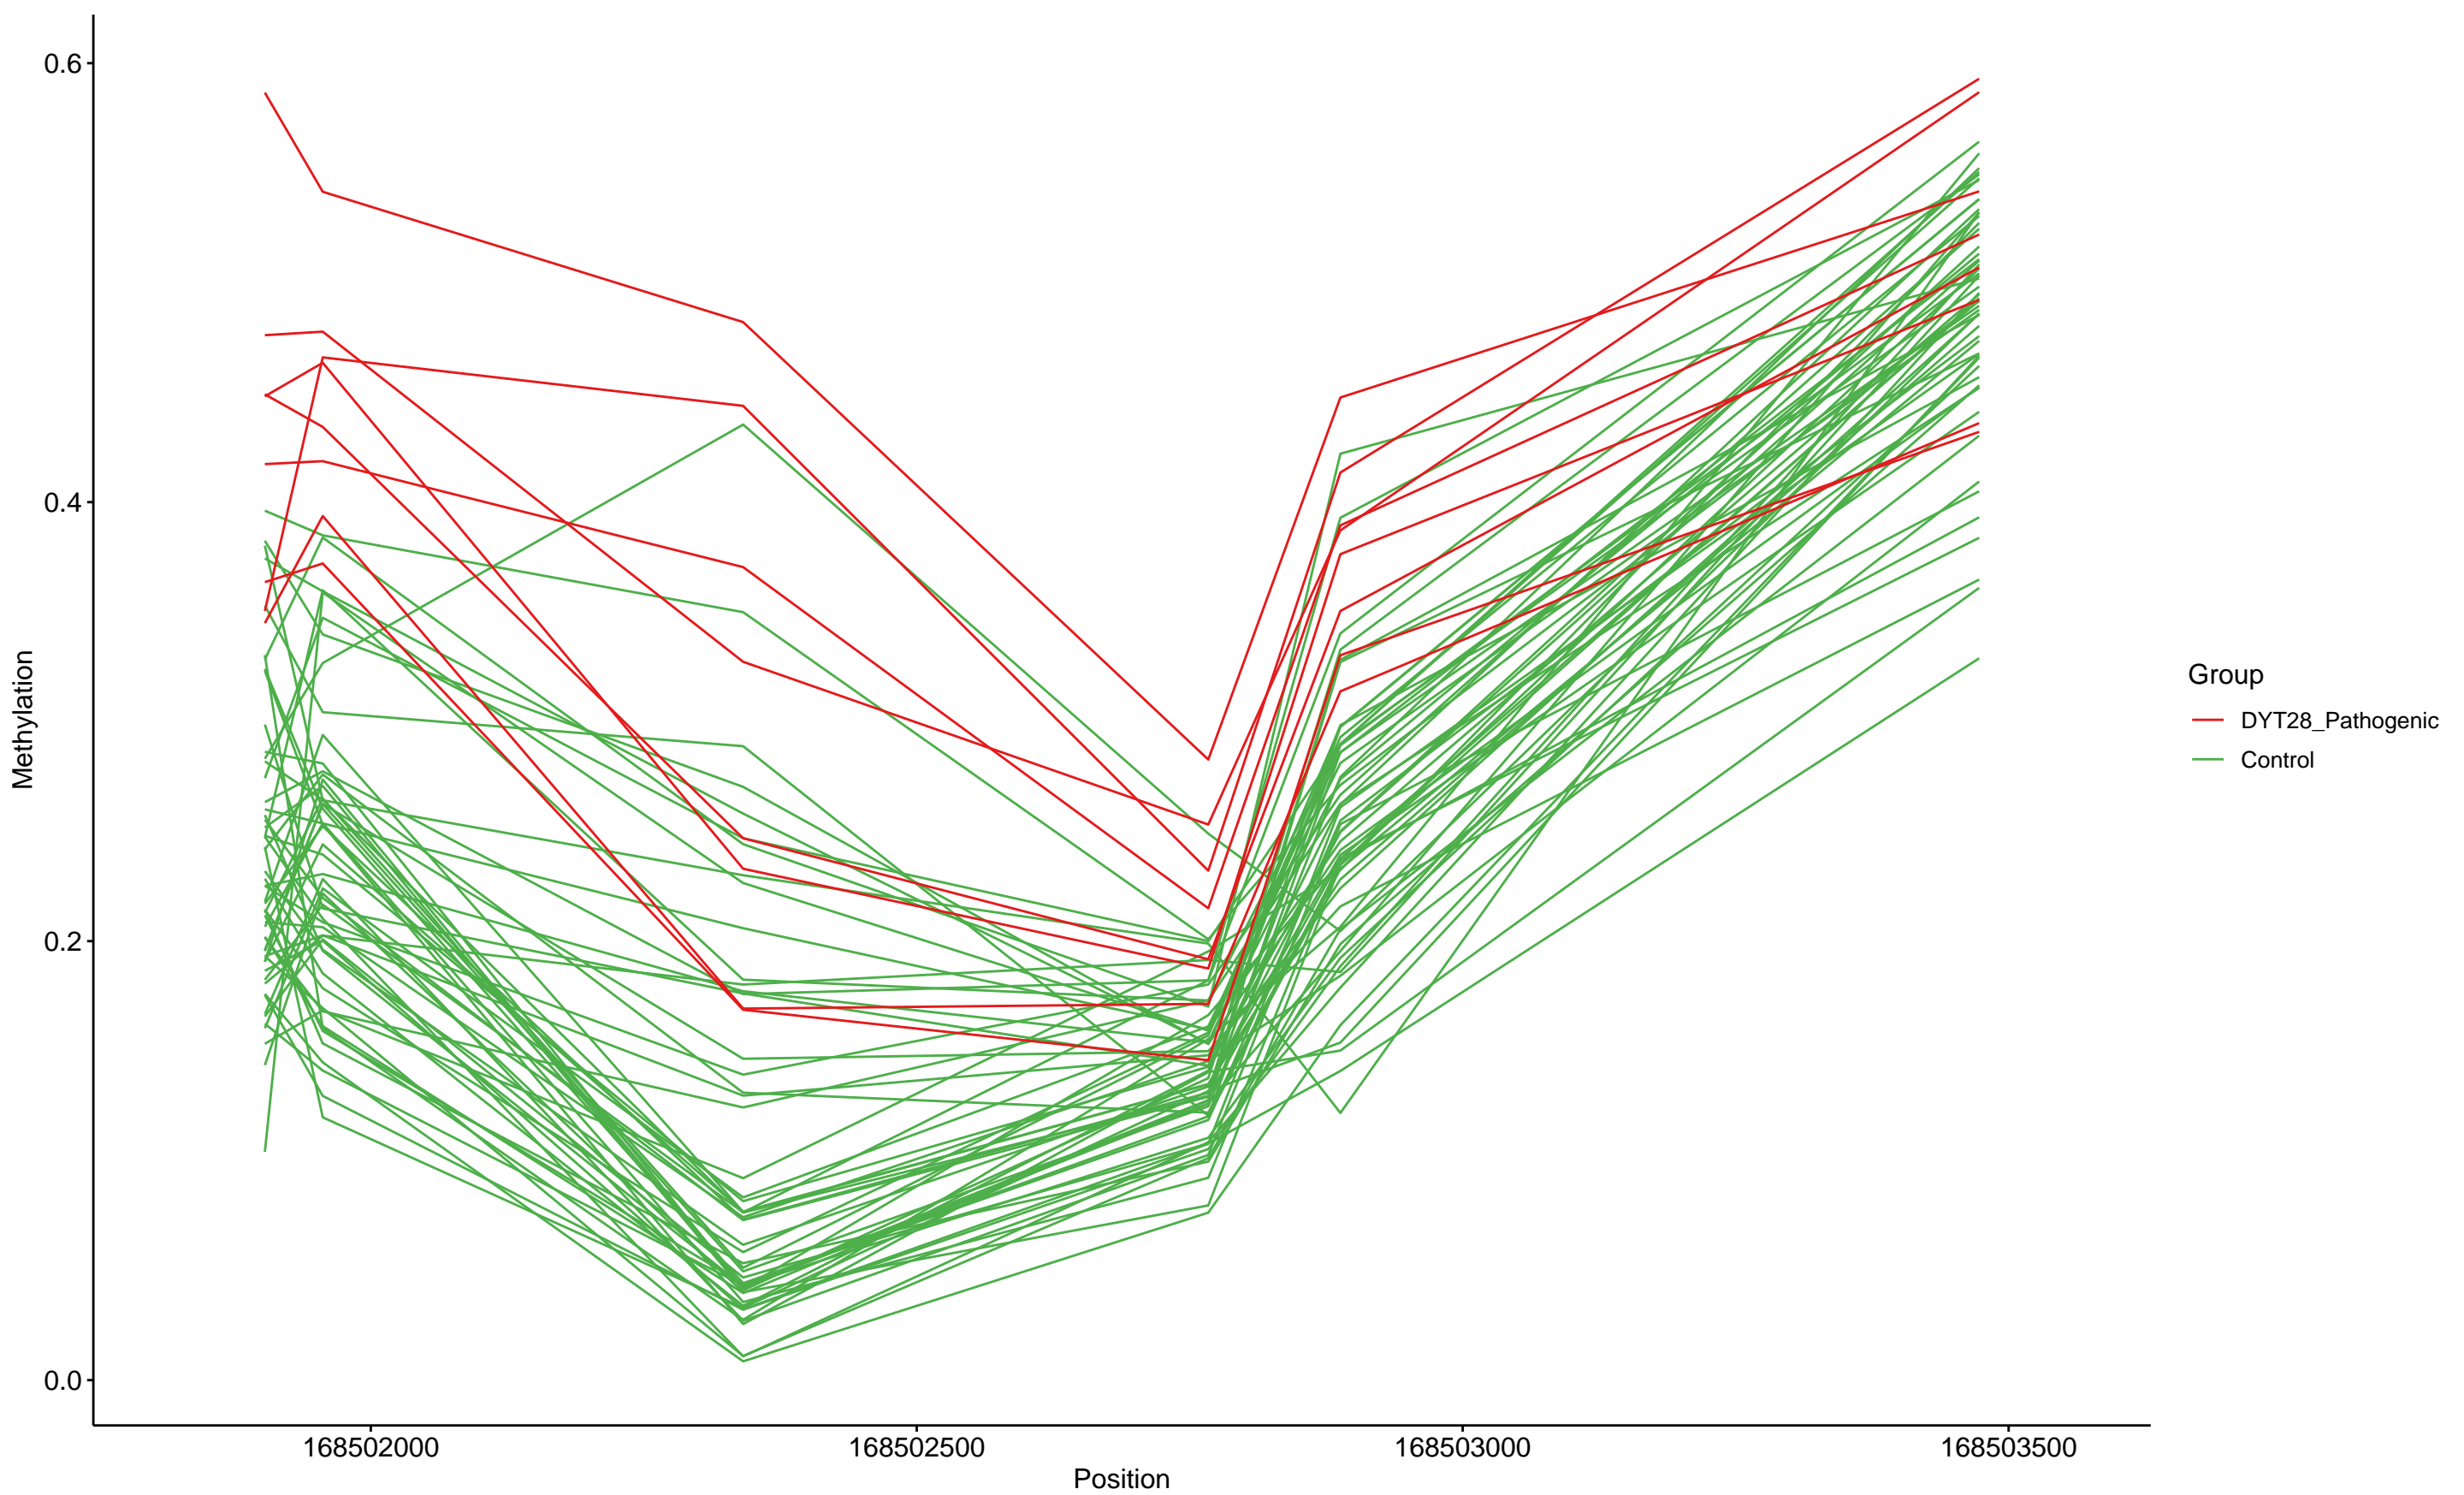

Region 130: chr7:149389444–149389941

Fisher: 4.31991368609496e-17

Stouffer: 2.46565906869148e-17

Mean difference: 0.102694014764301

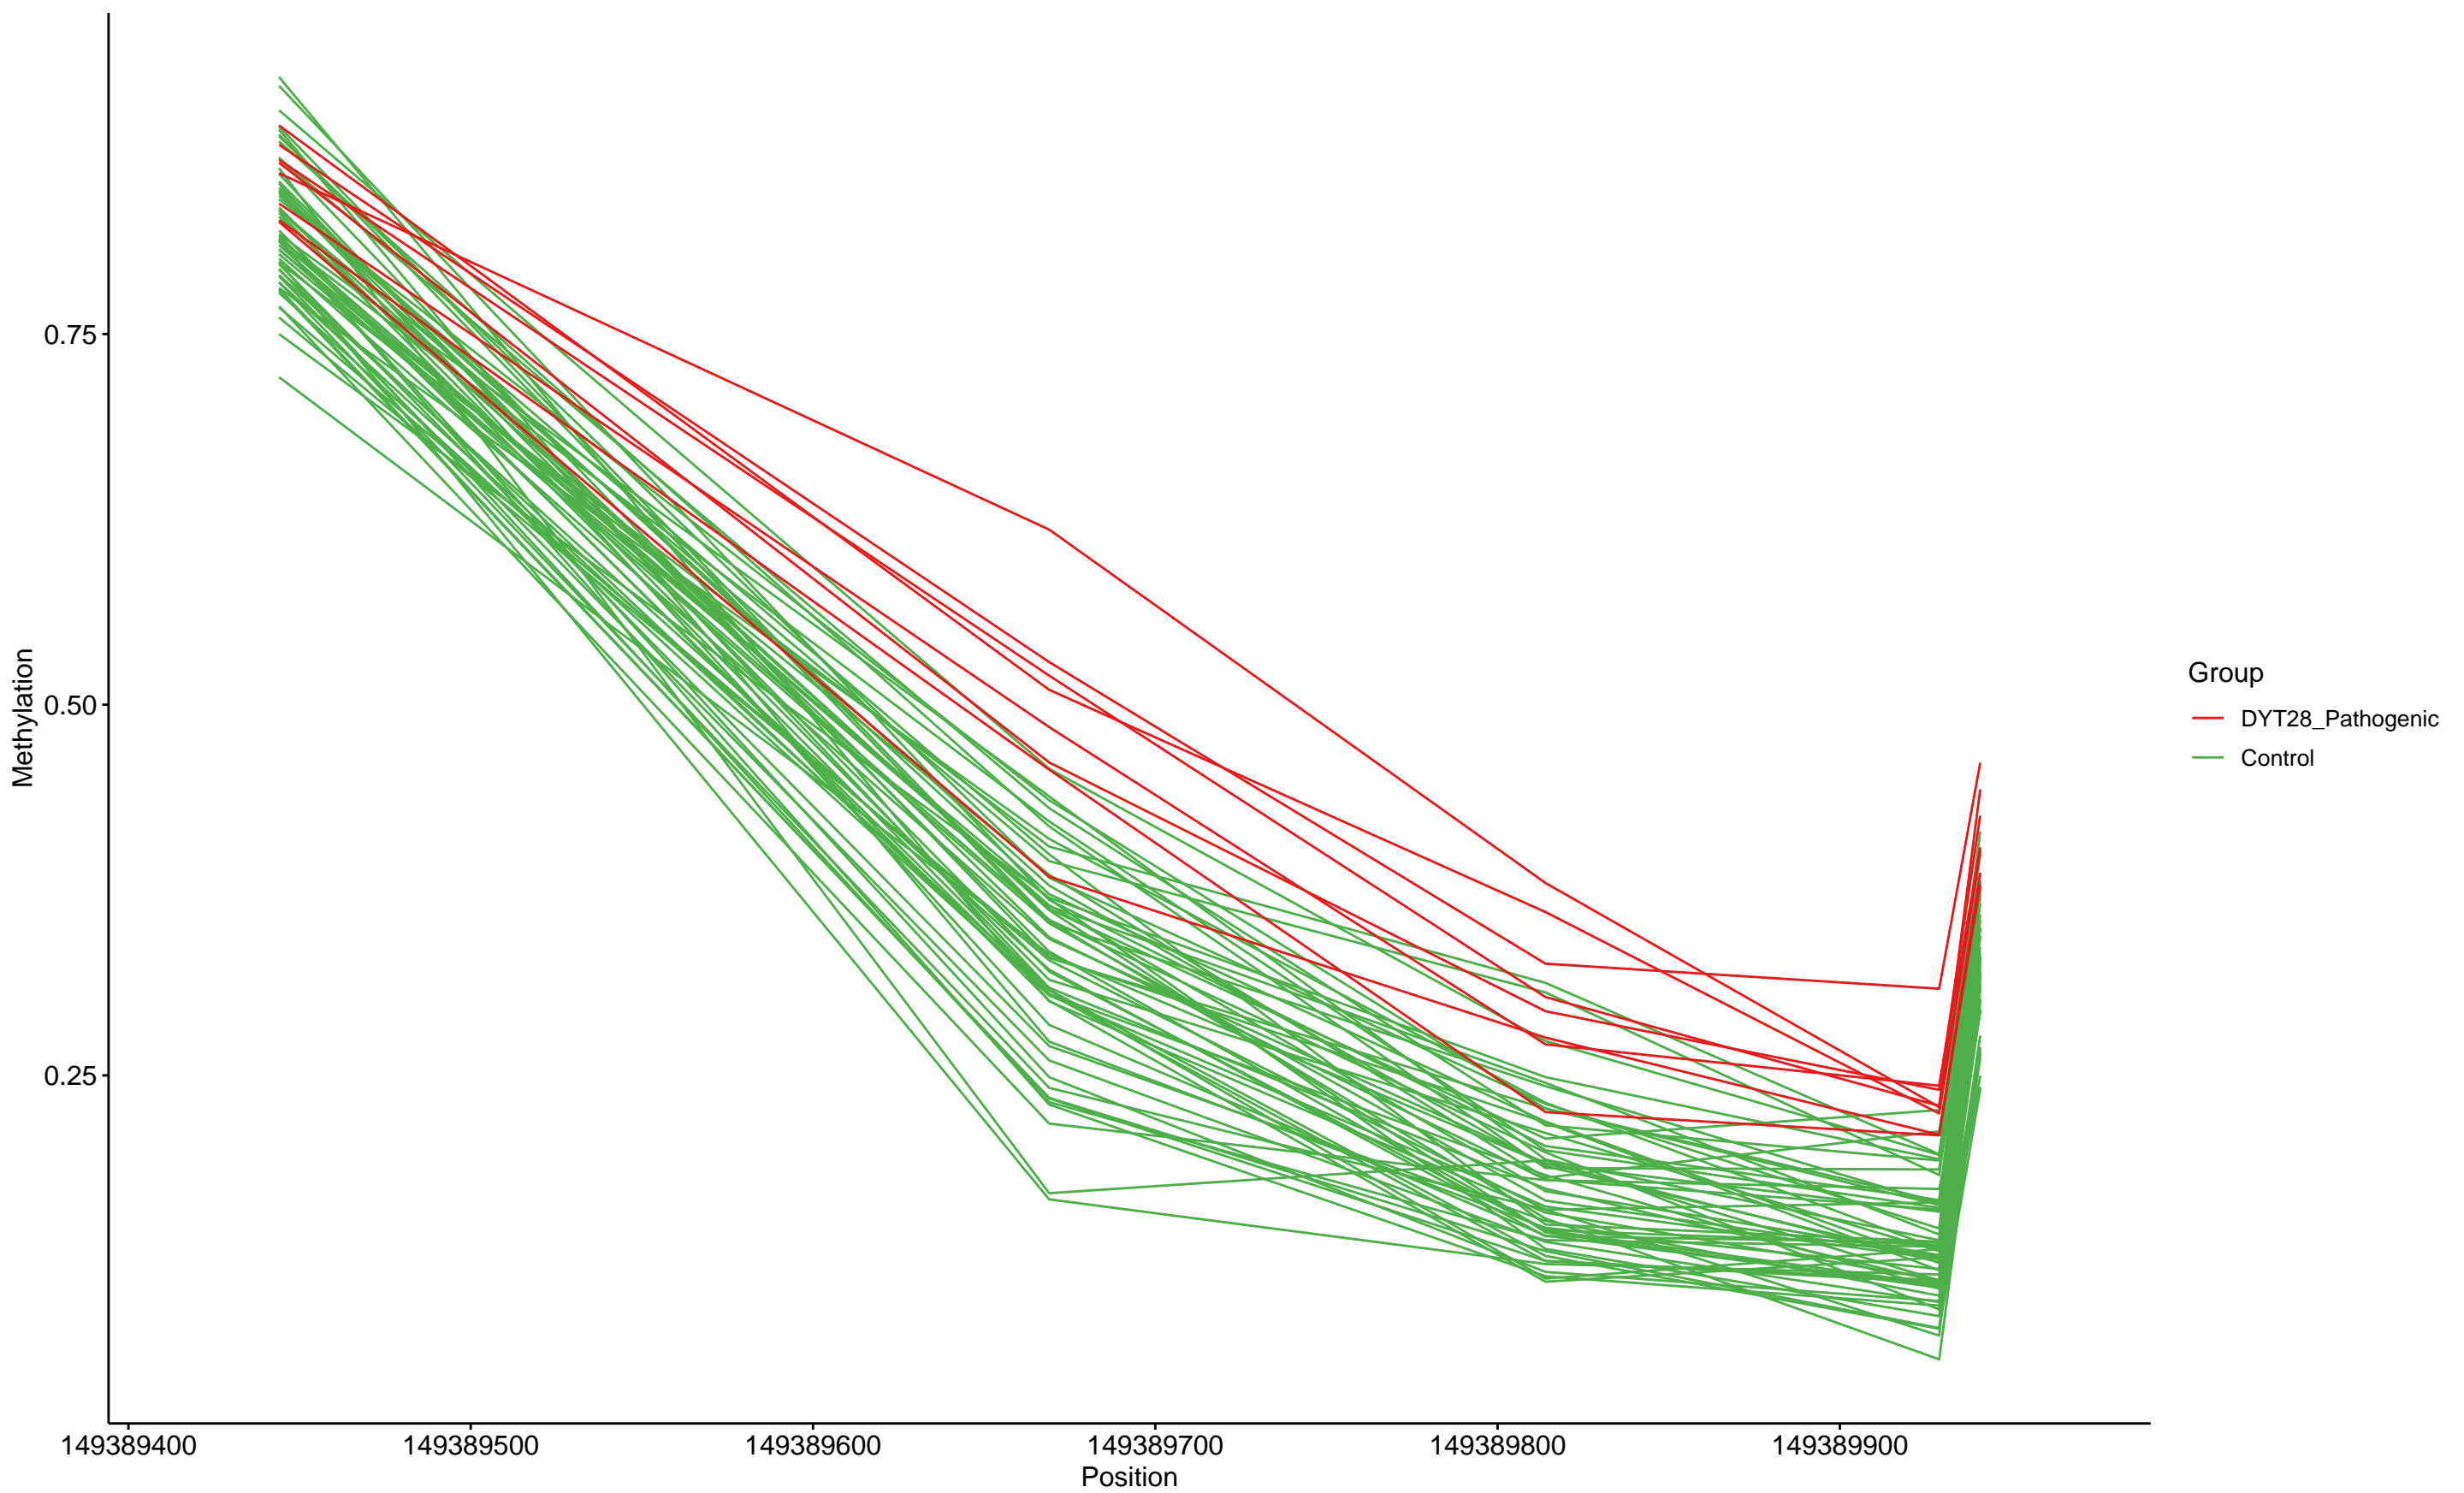

Region 131: chr6:166422182-166422741

Fisher: 5.61012226647902e-17

Stouffer: 4.08809585299748e-18

Mean difference: 0.101948780904776

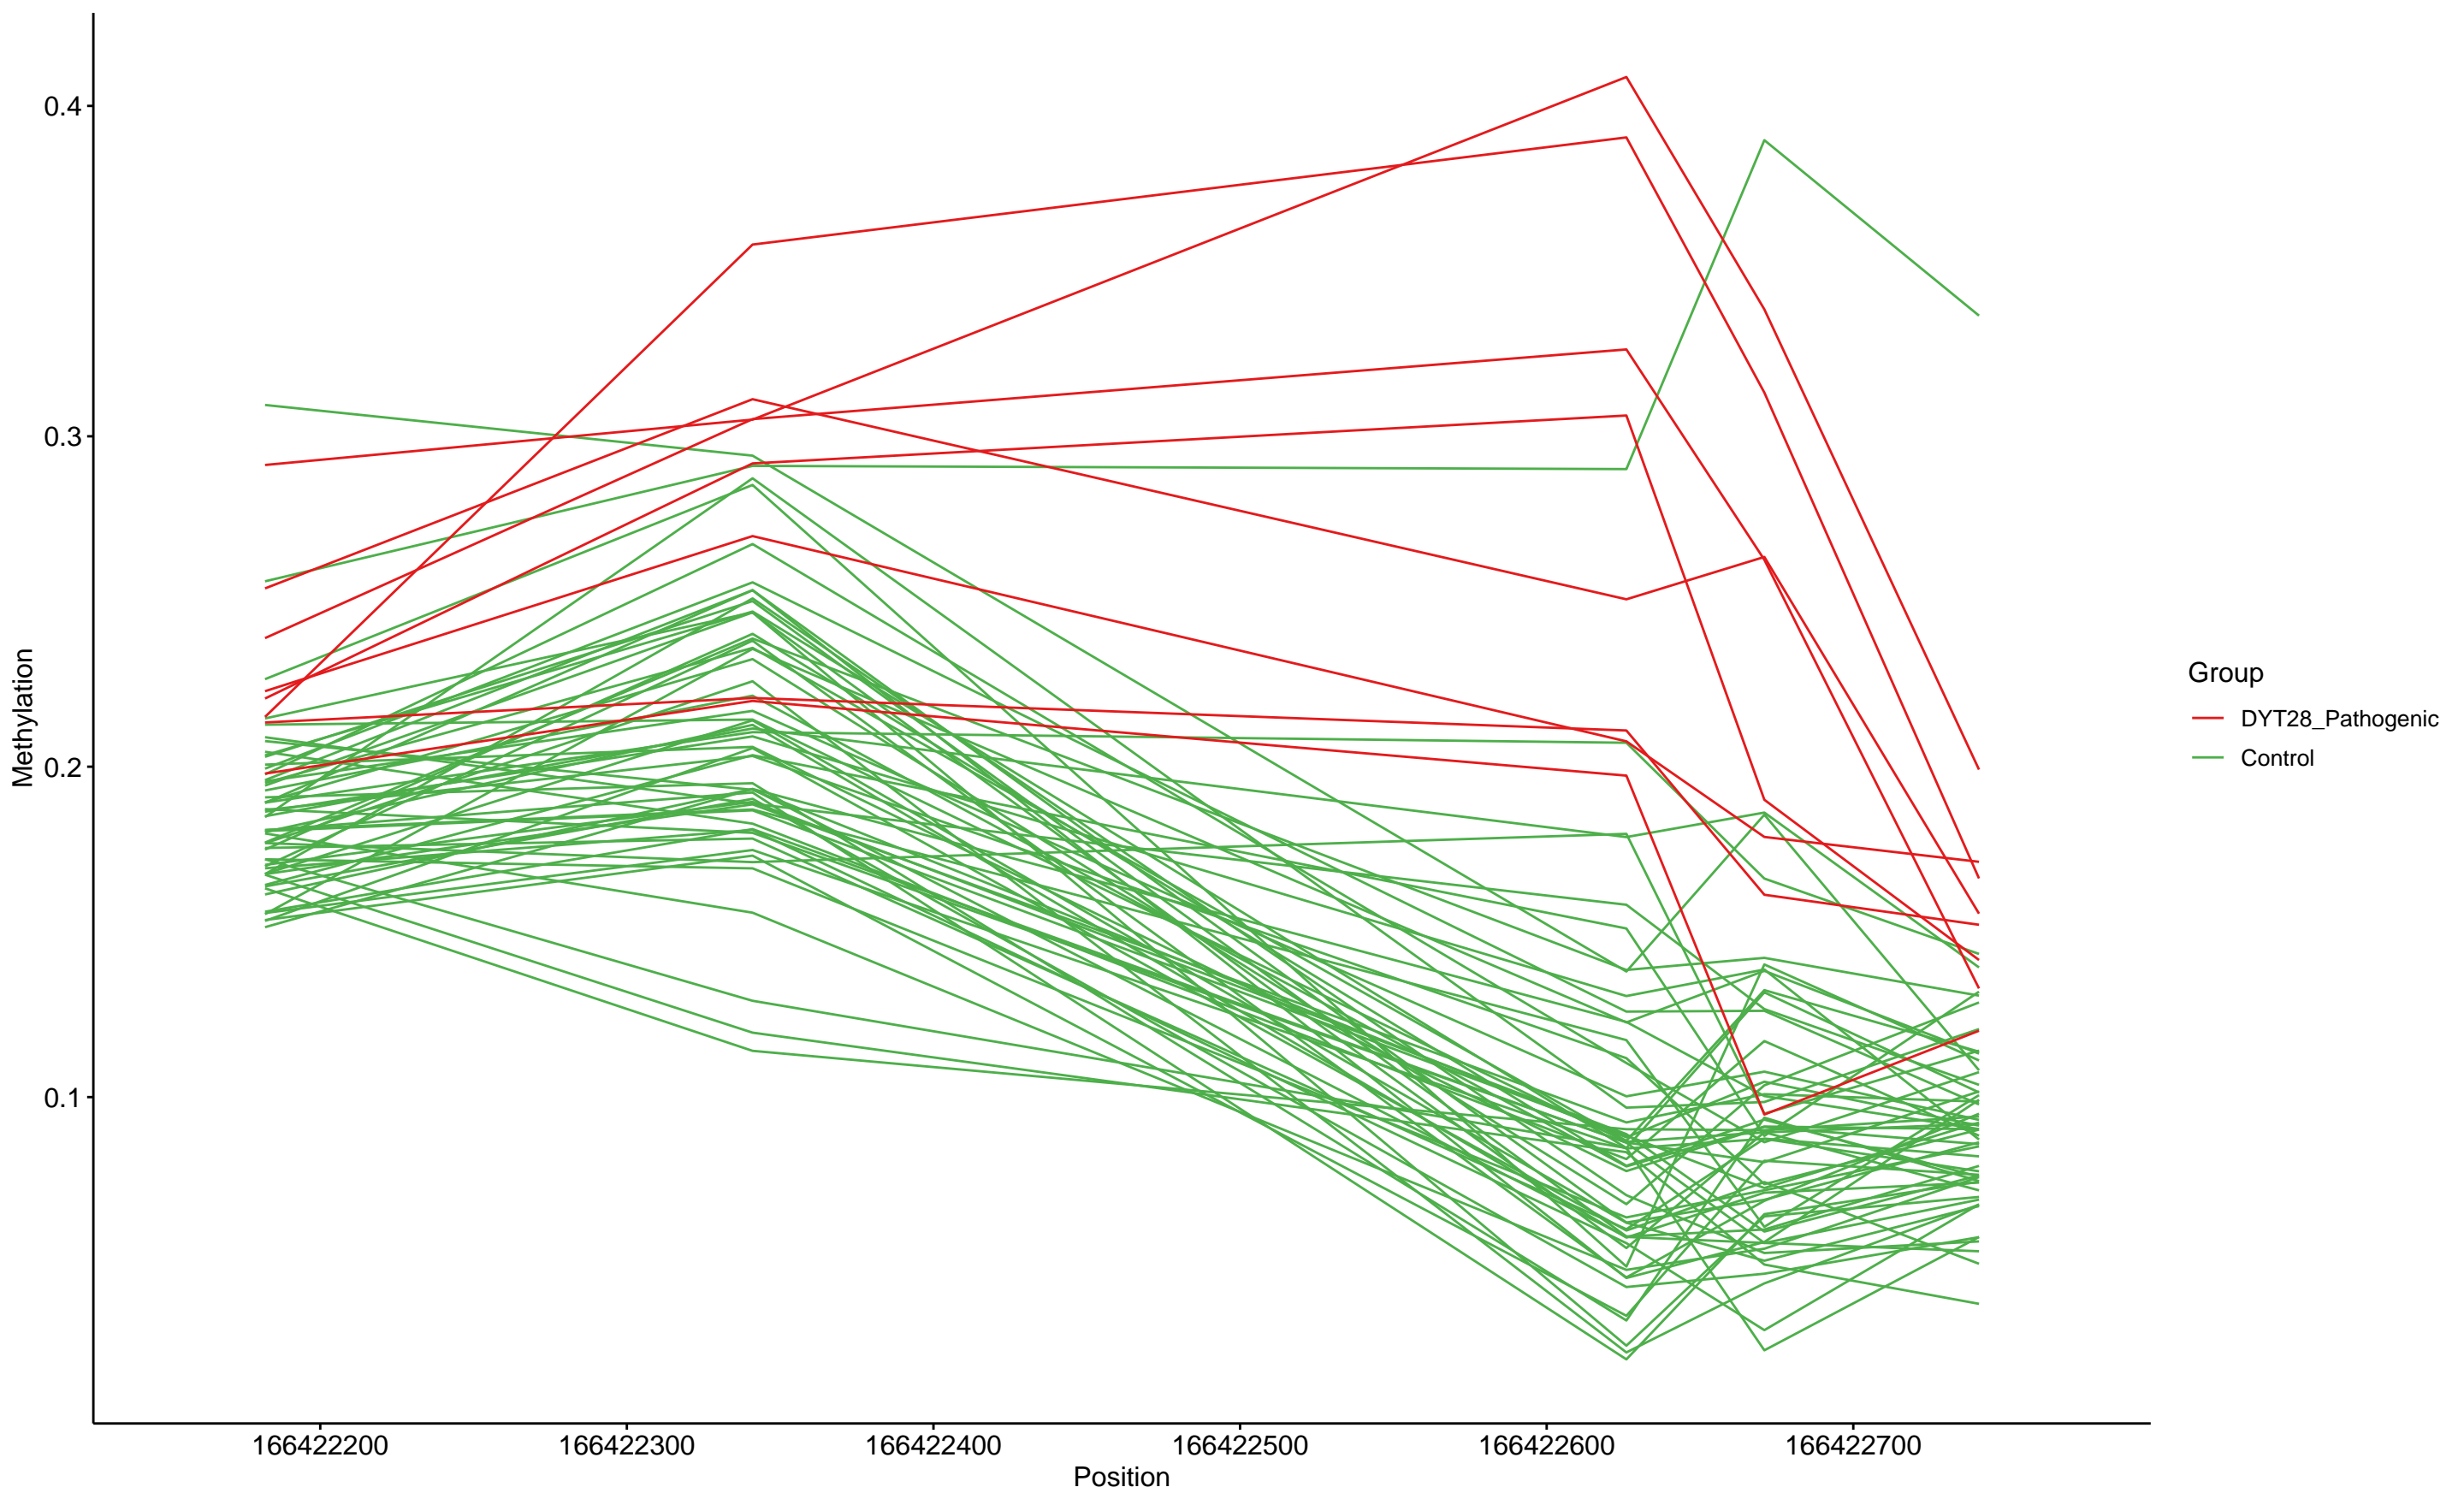



Region 132: chr17:33759929–33760971

Fisher:  $2.13725408504543e-16$

Stouffer:  $3.29606498242725e-18$

Mean difference: 0.103499856692473

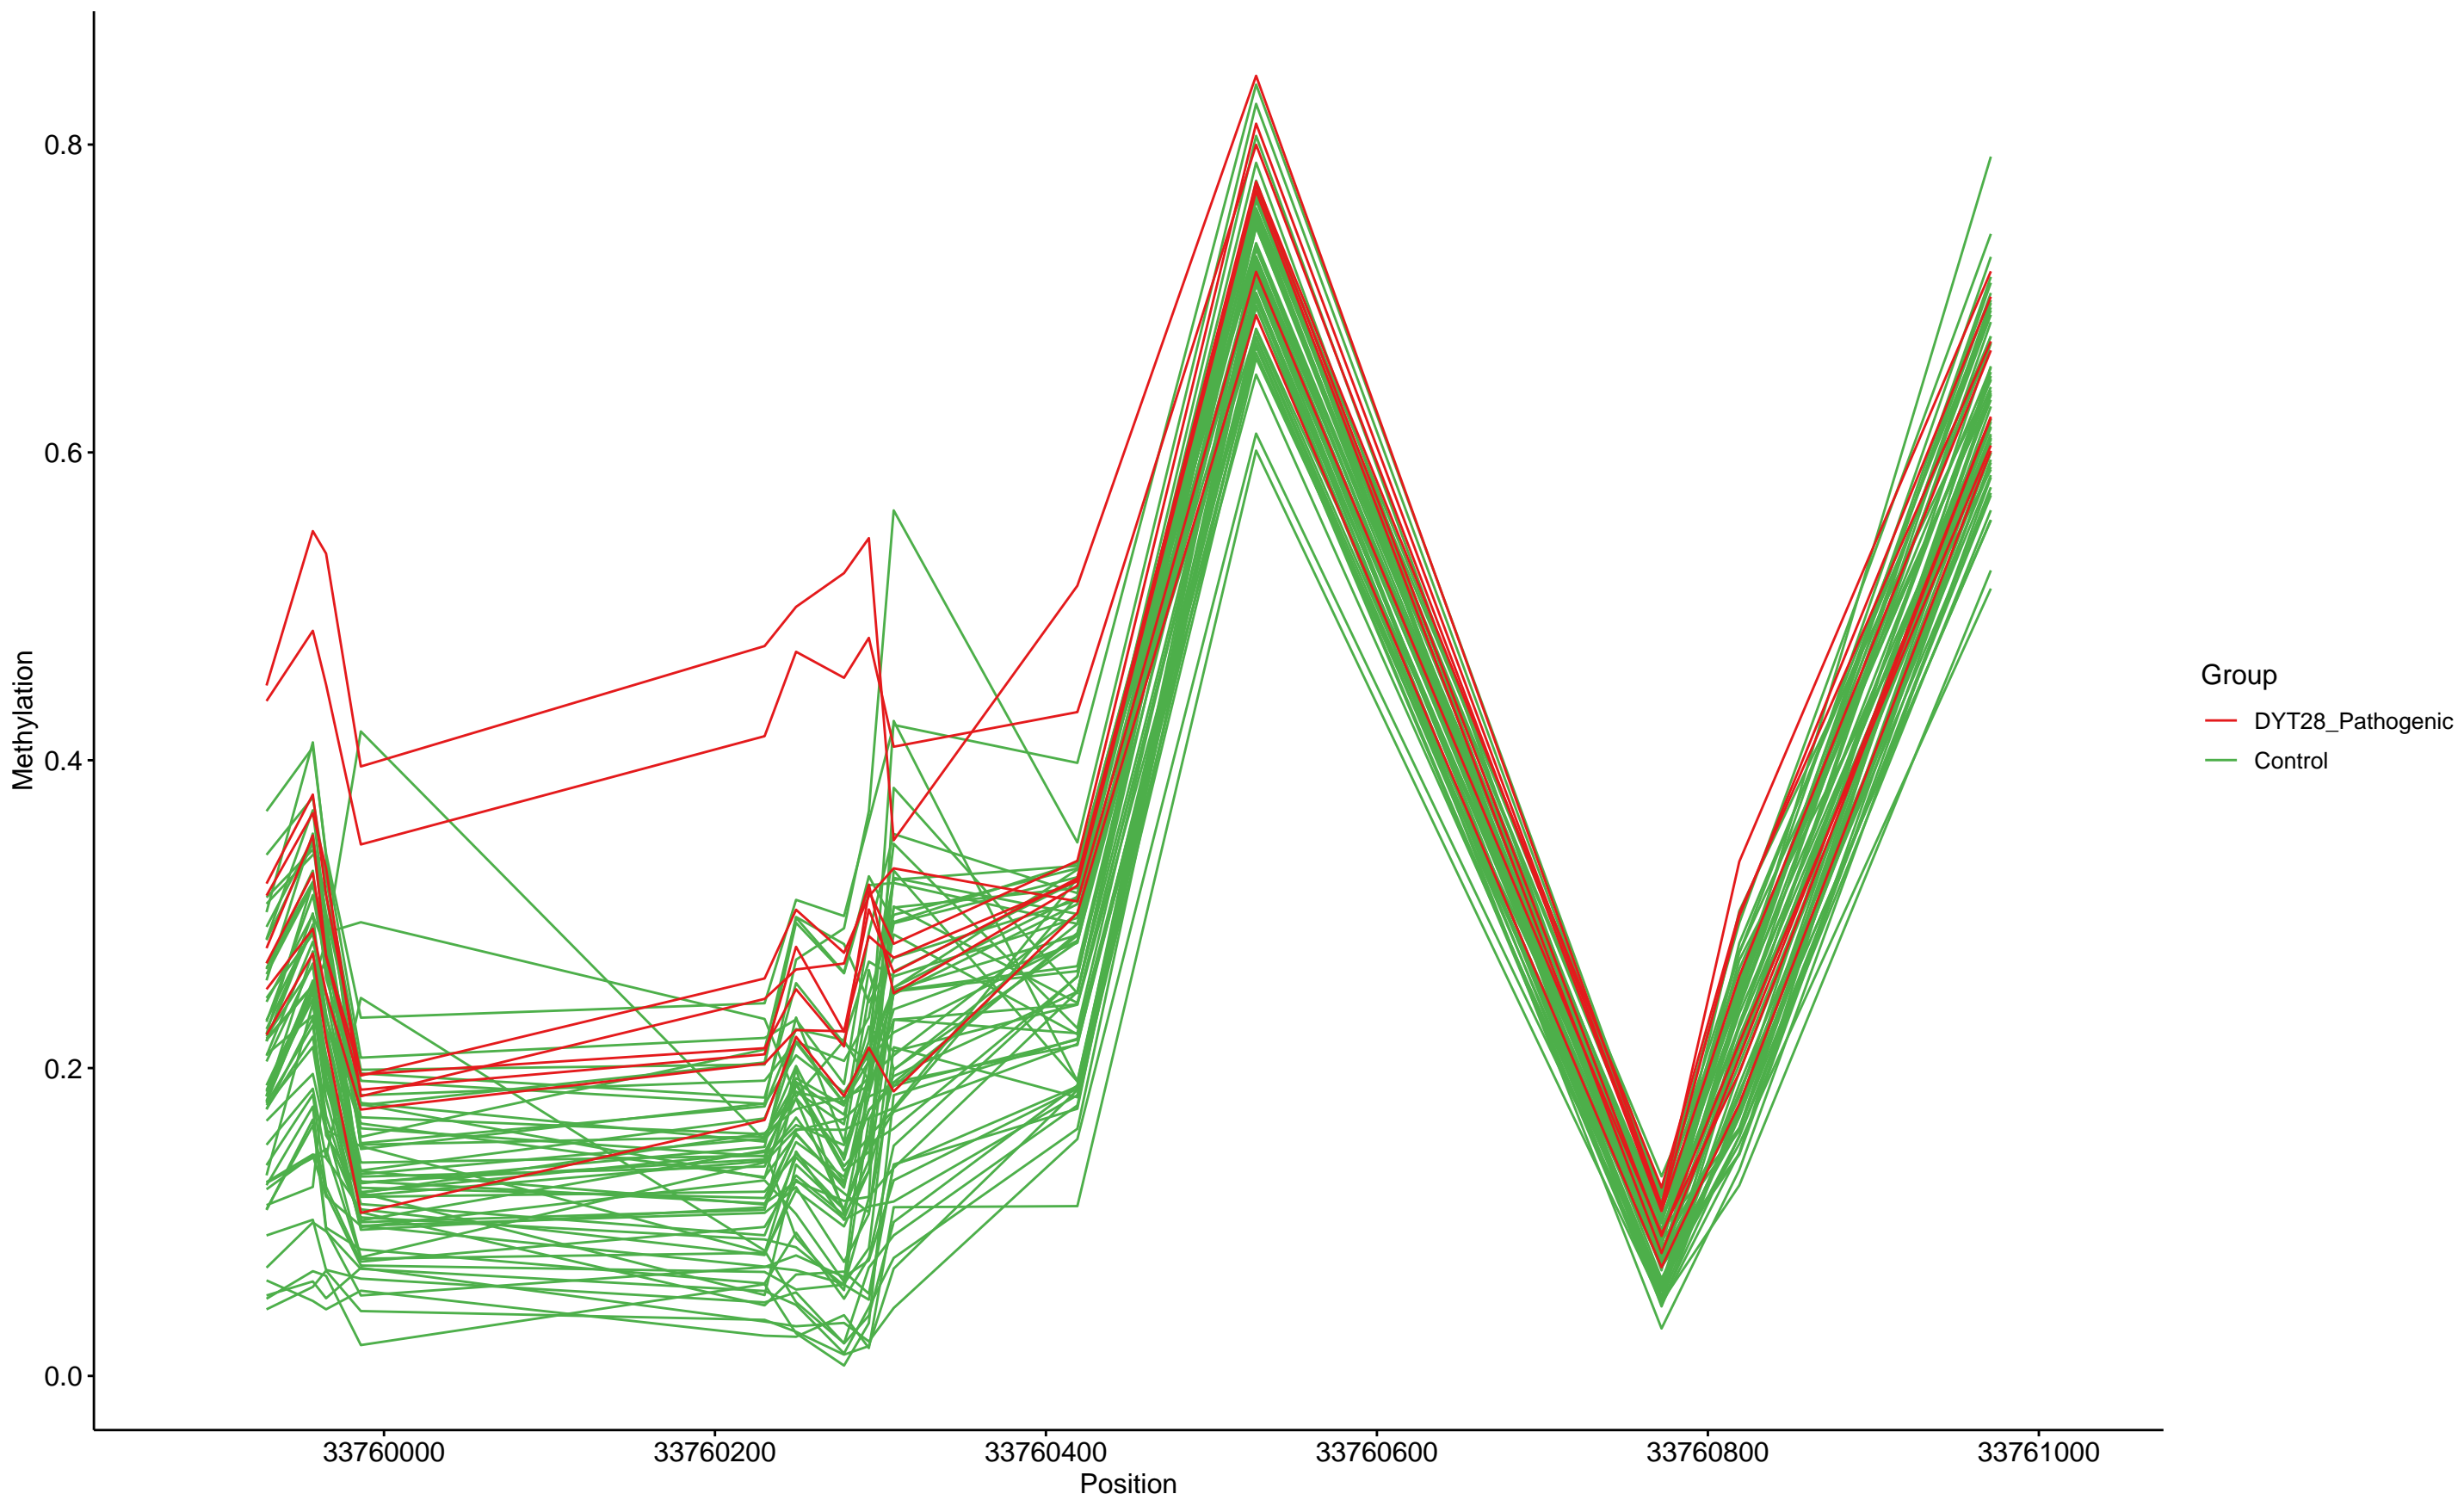



Region 133: chr1:19600141–19601069

Fisher: 2.70084364769819e-16

Stouffer: 8.28200831600448e-15

Mean difference: 0.144245630139346

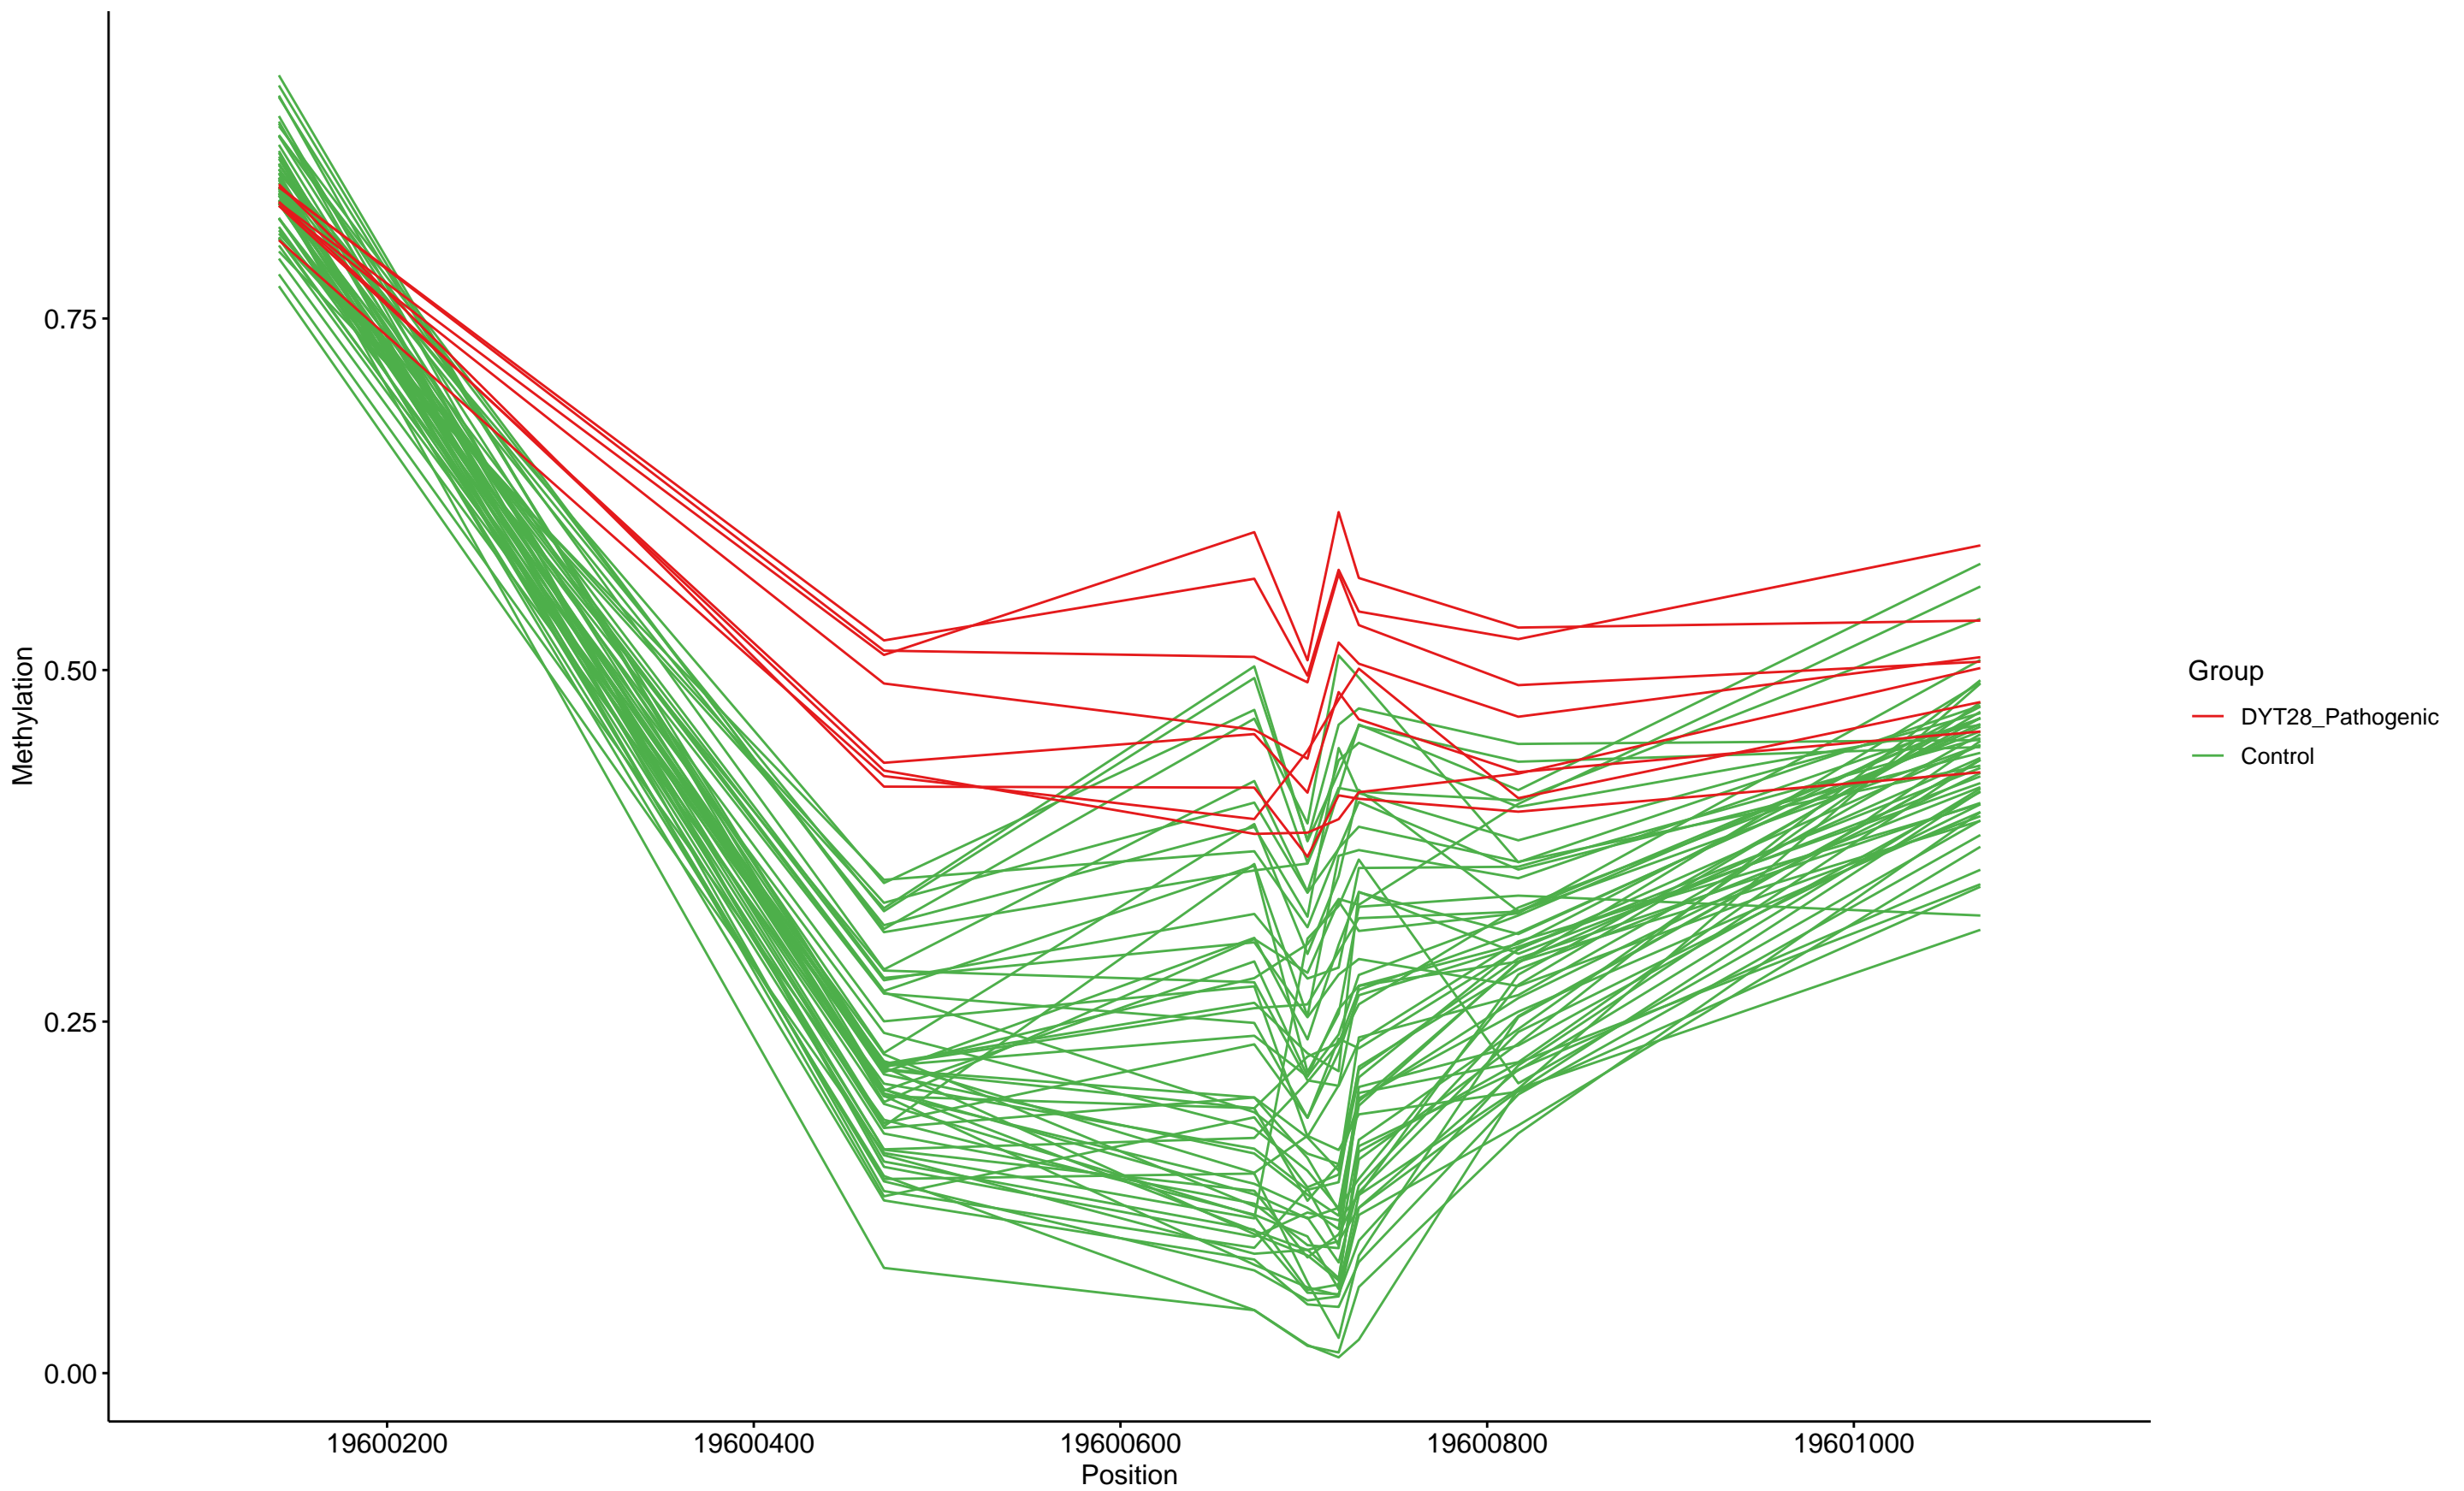

Region 134: chr13:100217924–100219013

Fisher: 3.08988250105195e-16

Stouffer: 1.45513212905829e-16

Mean difference: 0.101678642508889

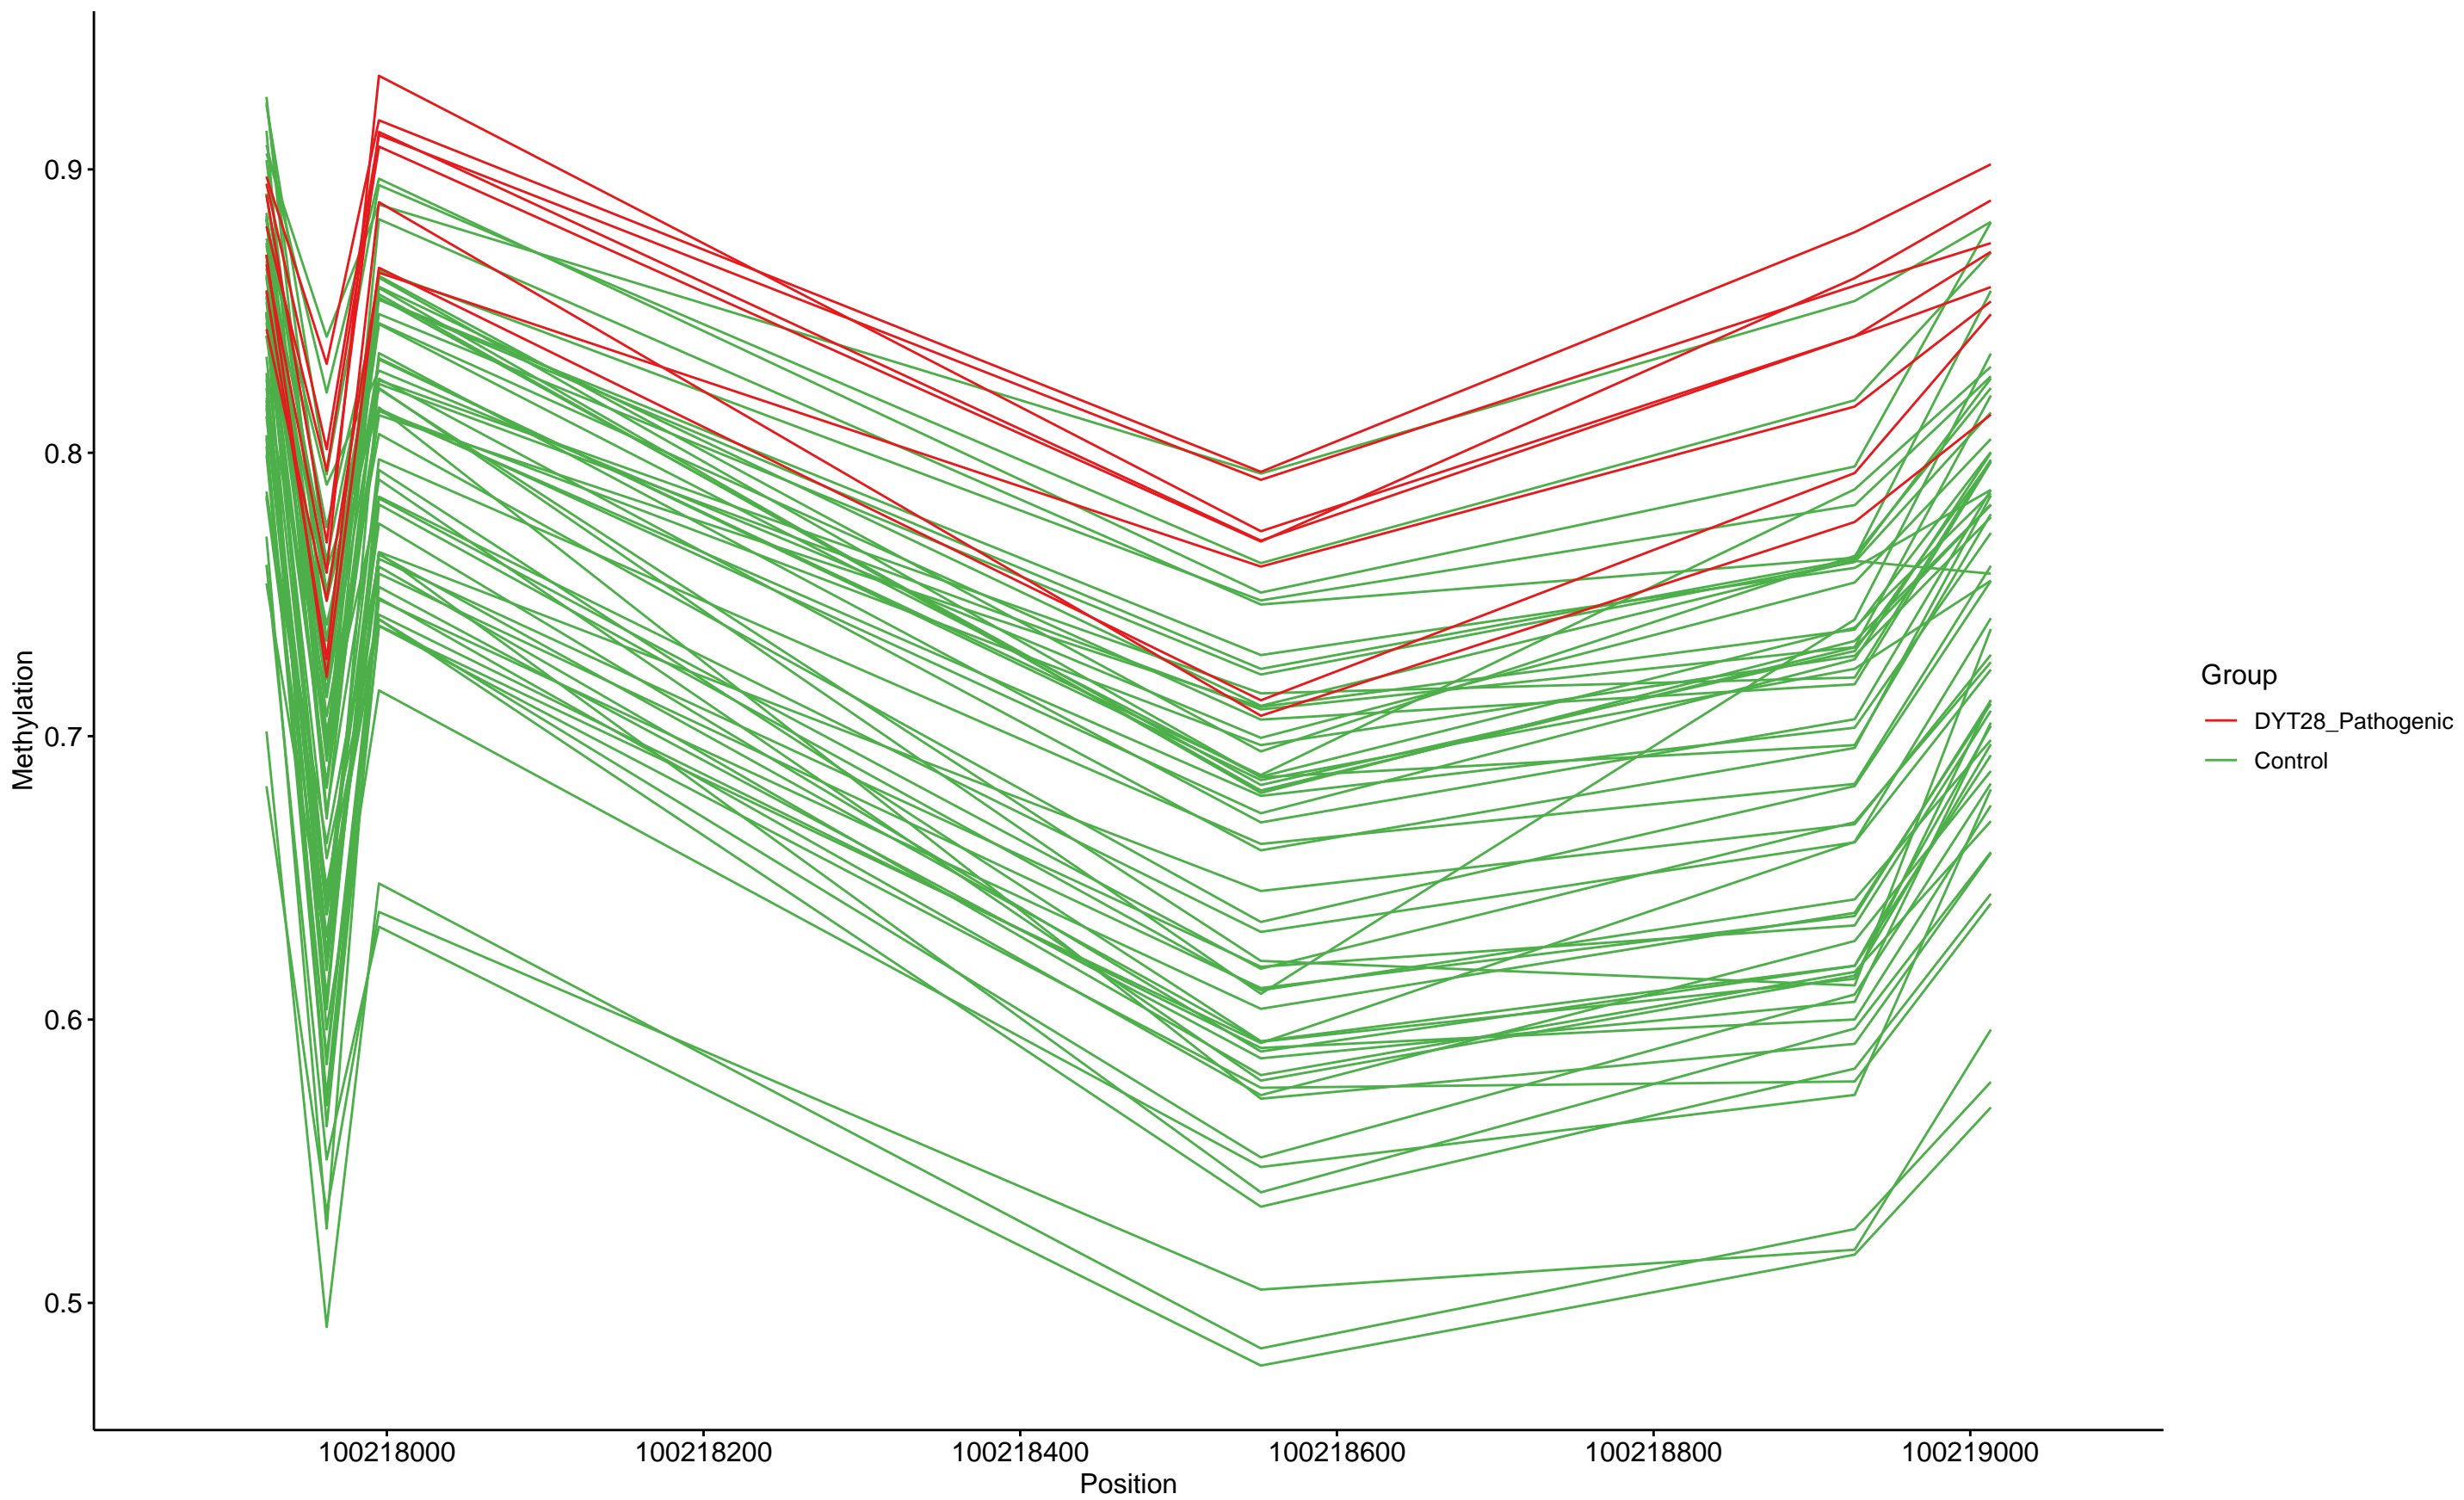

Region 135: chr2:118616377-118618593

Fisher: 8.34568931459336e-16

Stouffer: 1.67563354241717e-14

Mean difference: 0.10087465198642

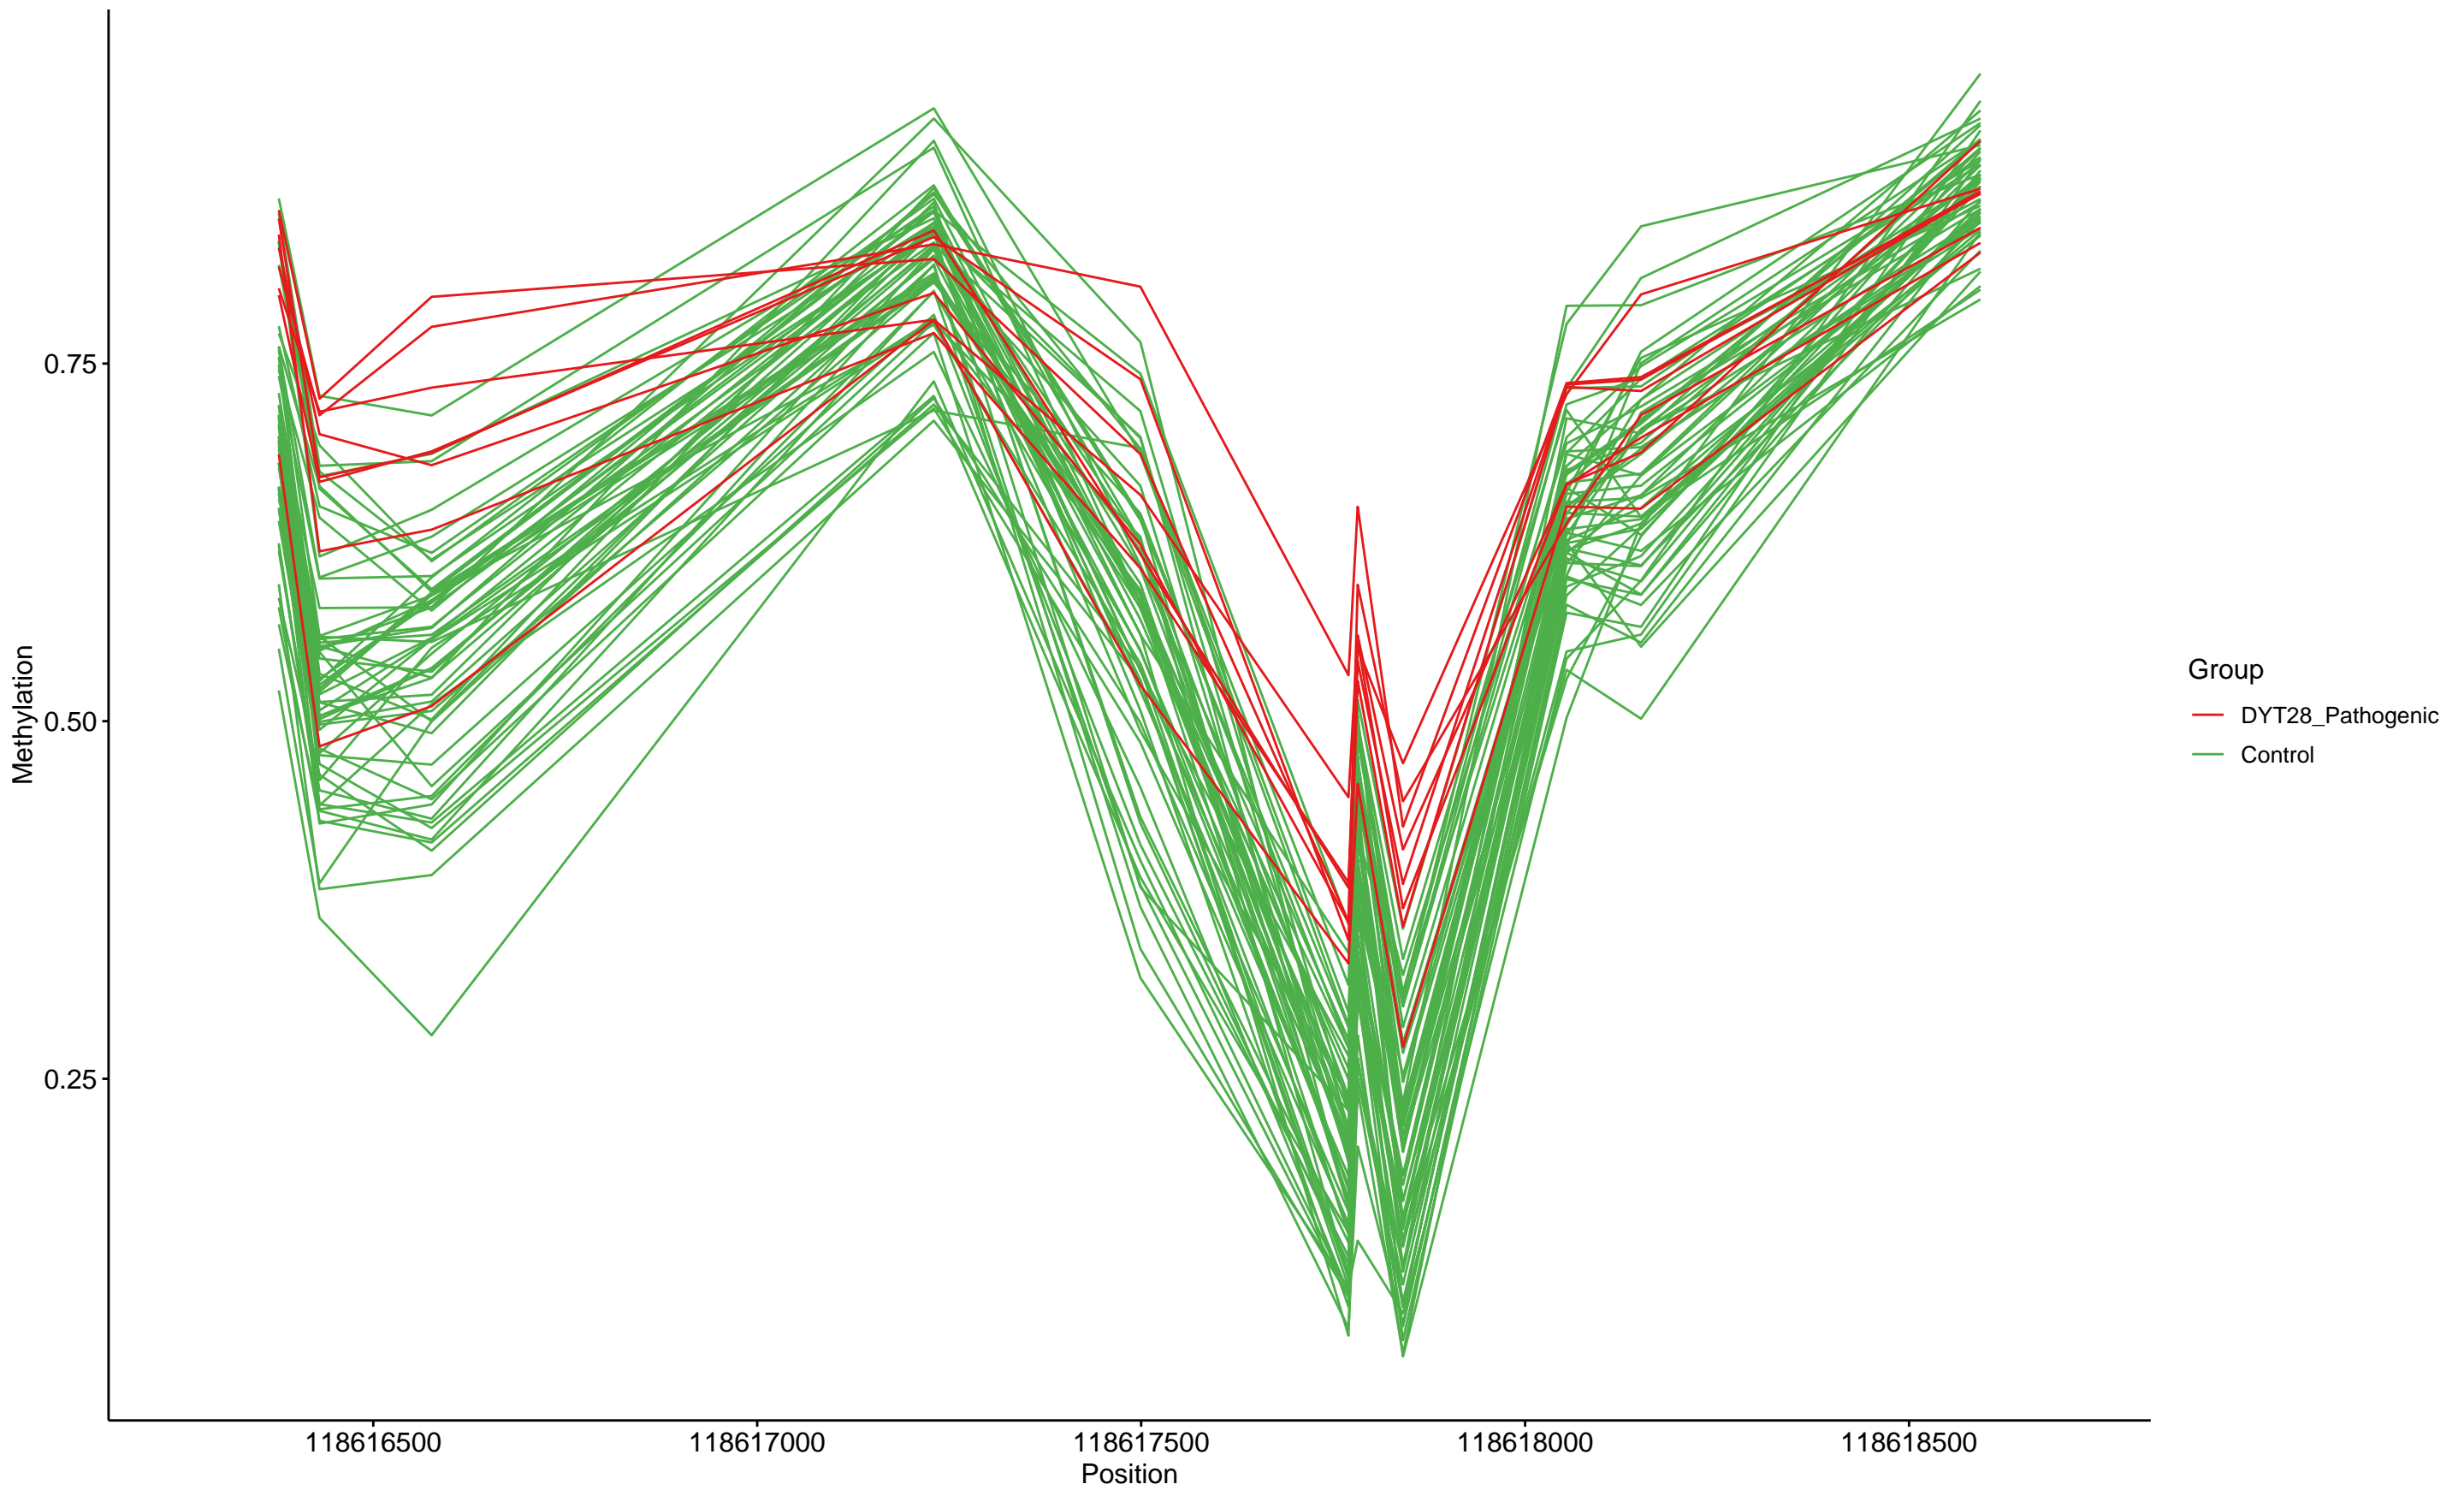



Region 136: chr16:71598553-71599556

Fisher: 1.01258698691182e-15

Stouffer: 6.4094901087335e-10

Mean difference: 0.104597317044647

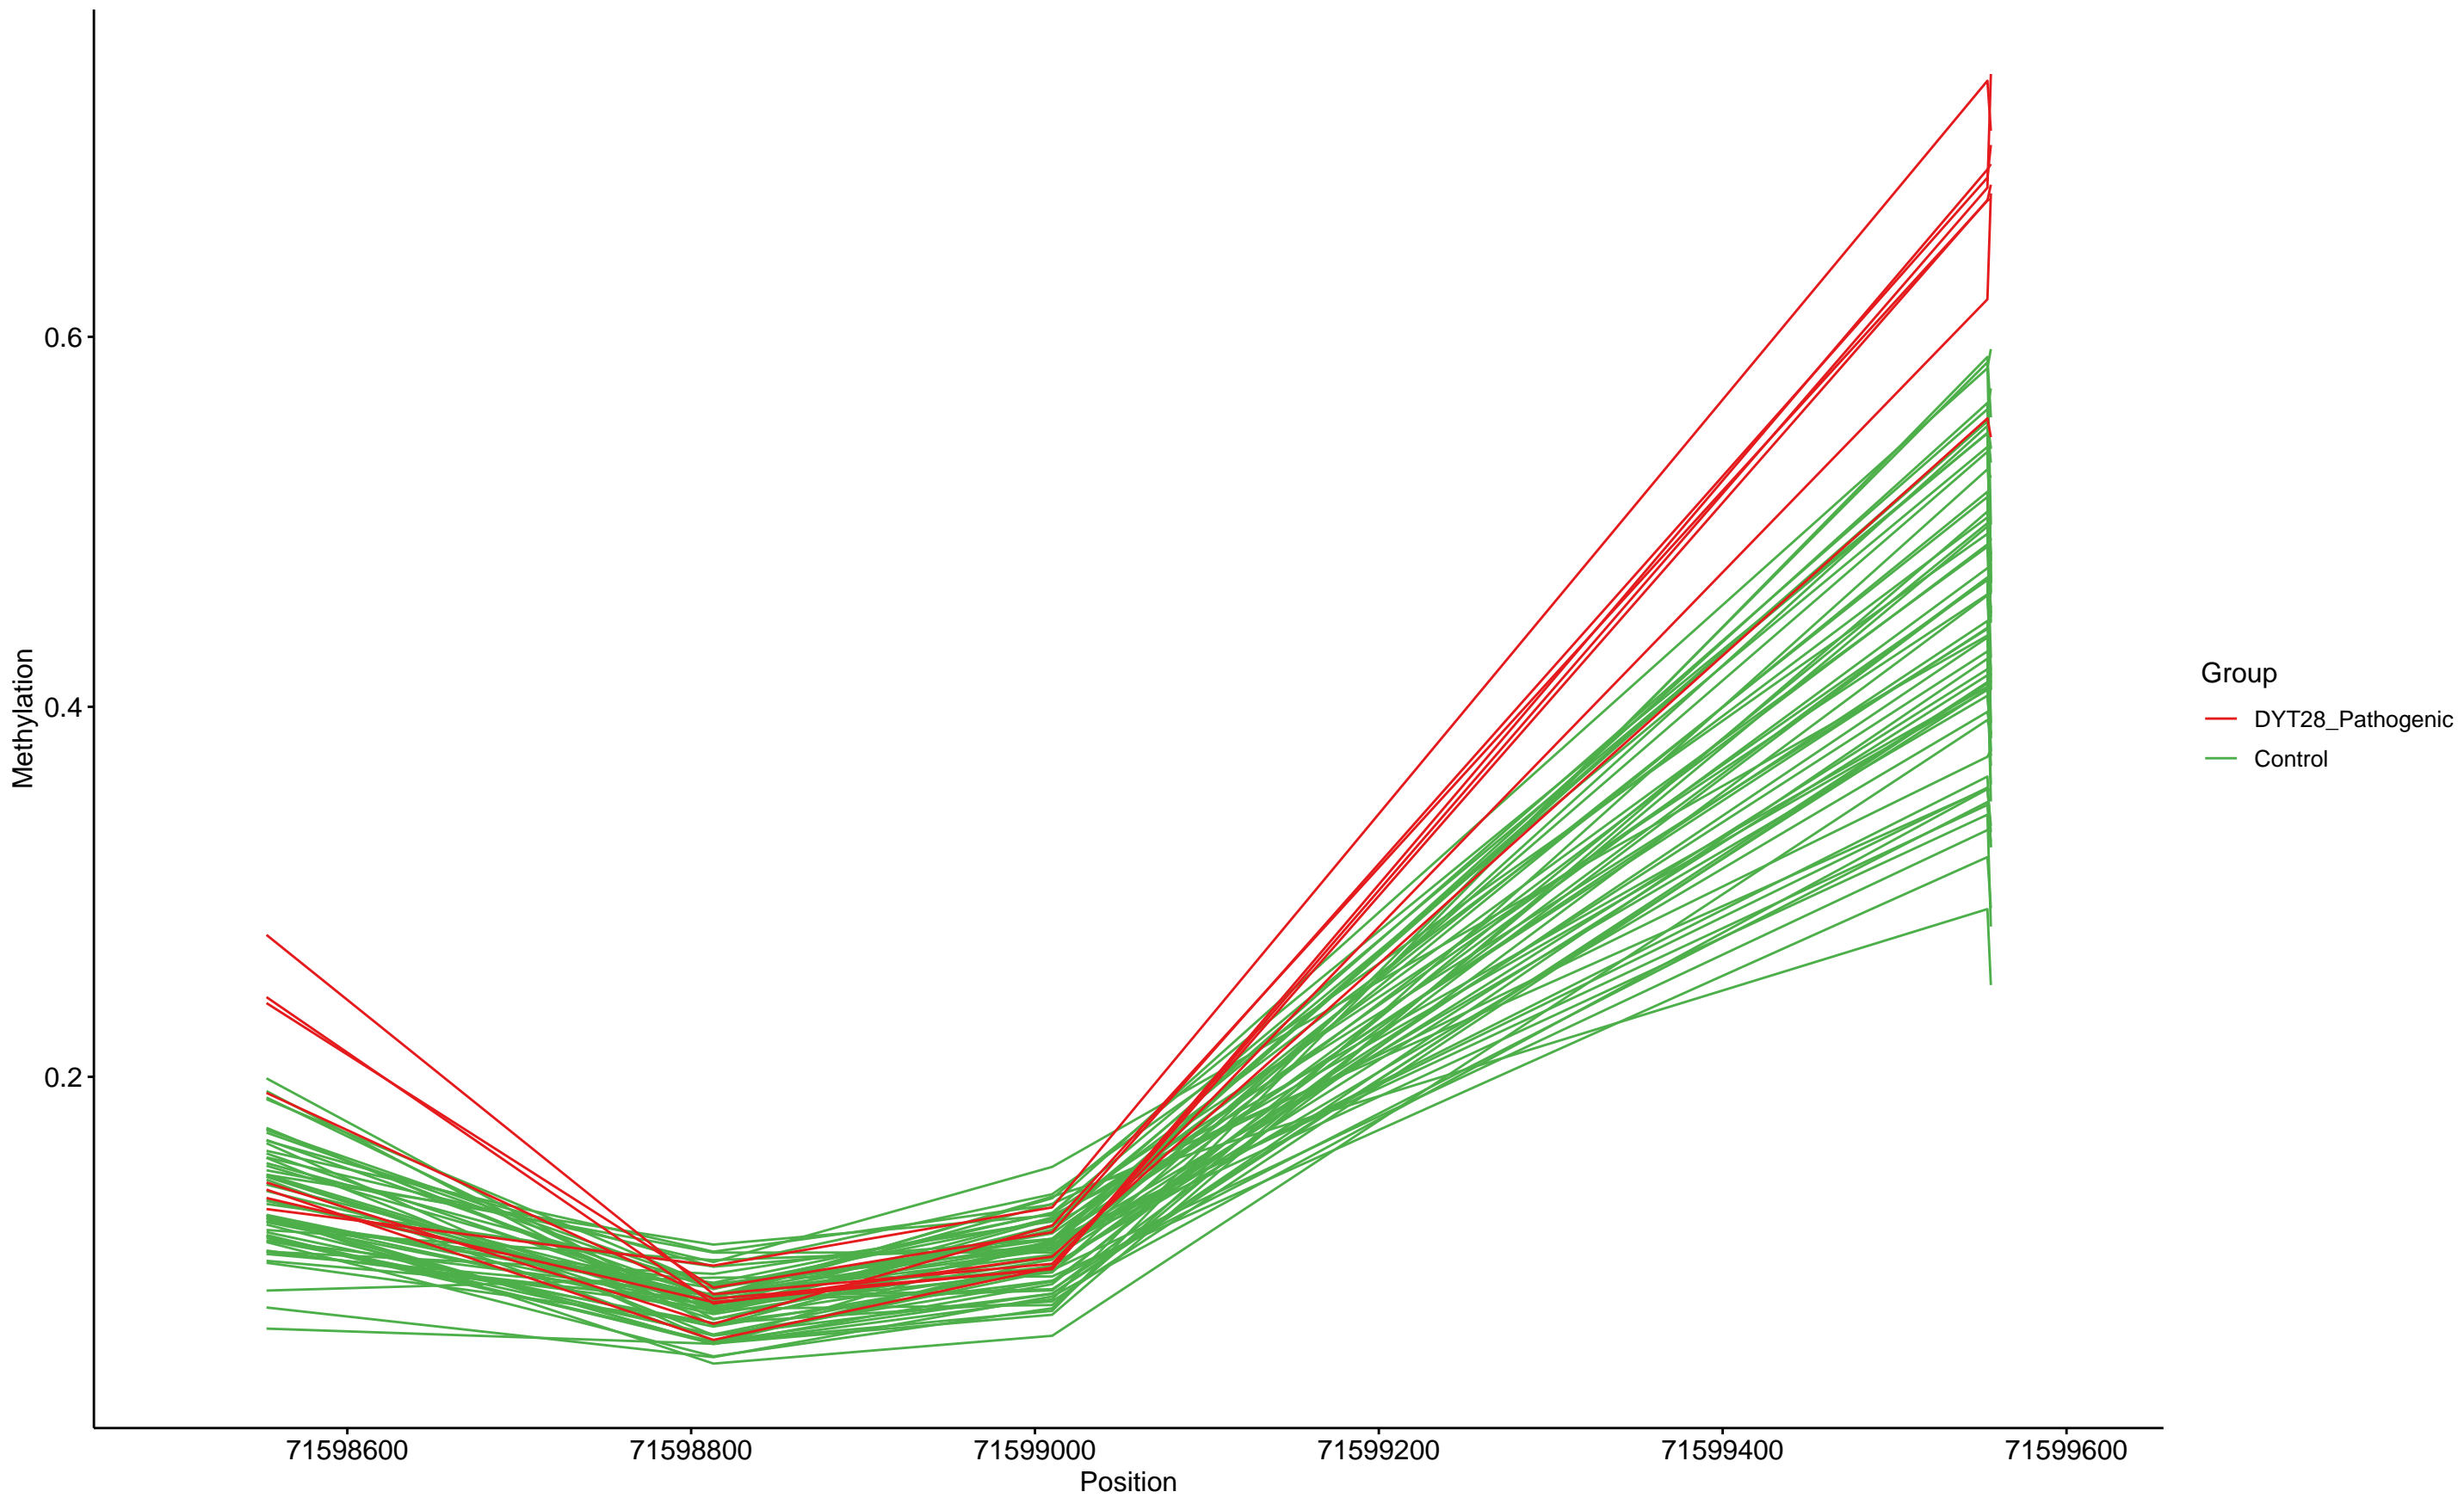

Region 137: chr3:350602–351003

Fisher: 1.16125586360933e-15

Stouffer: 3.00368913774392e-17

Mean difference: 0.11642892986524

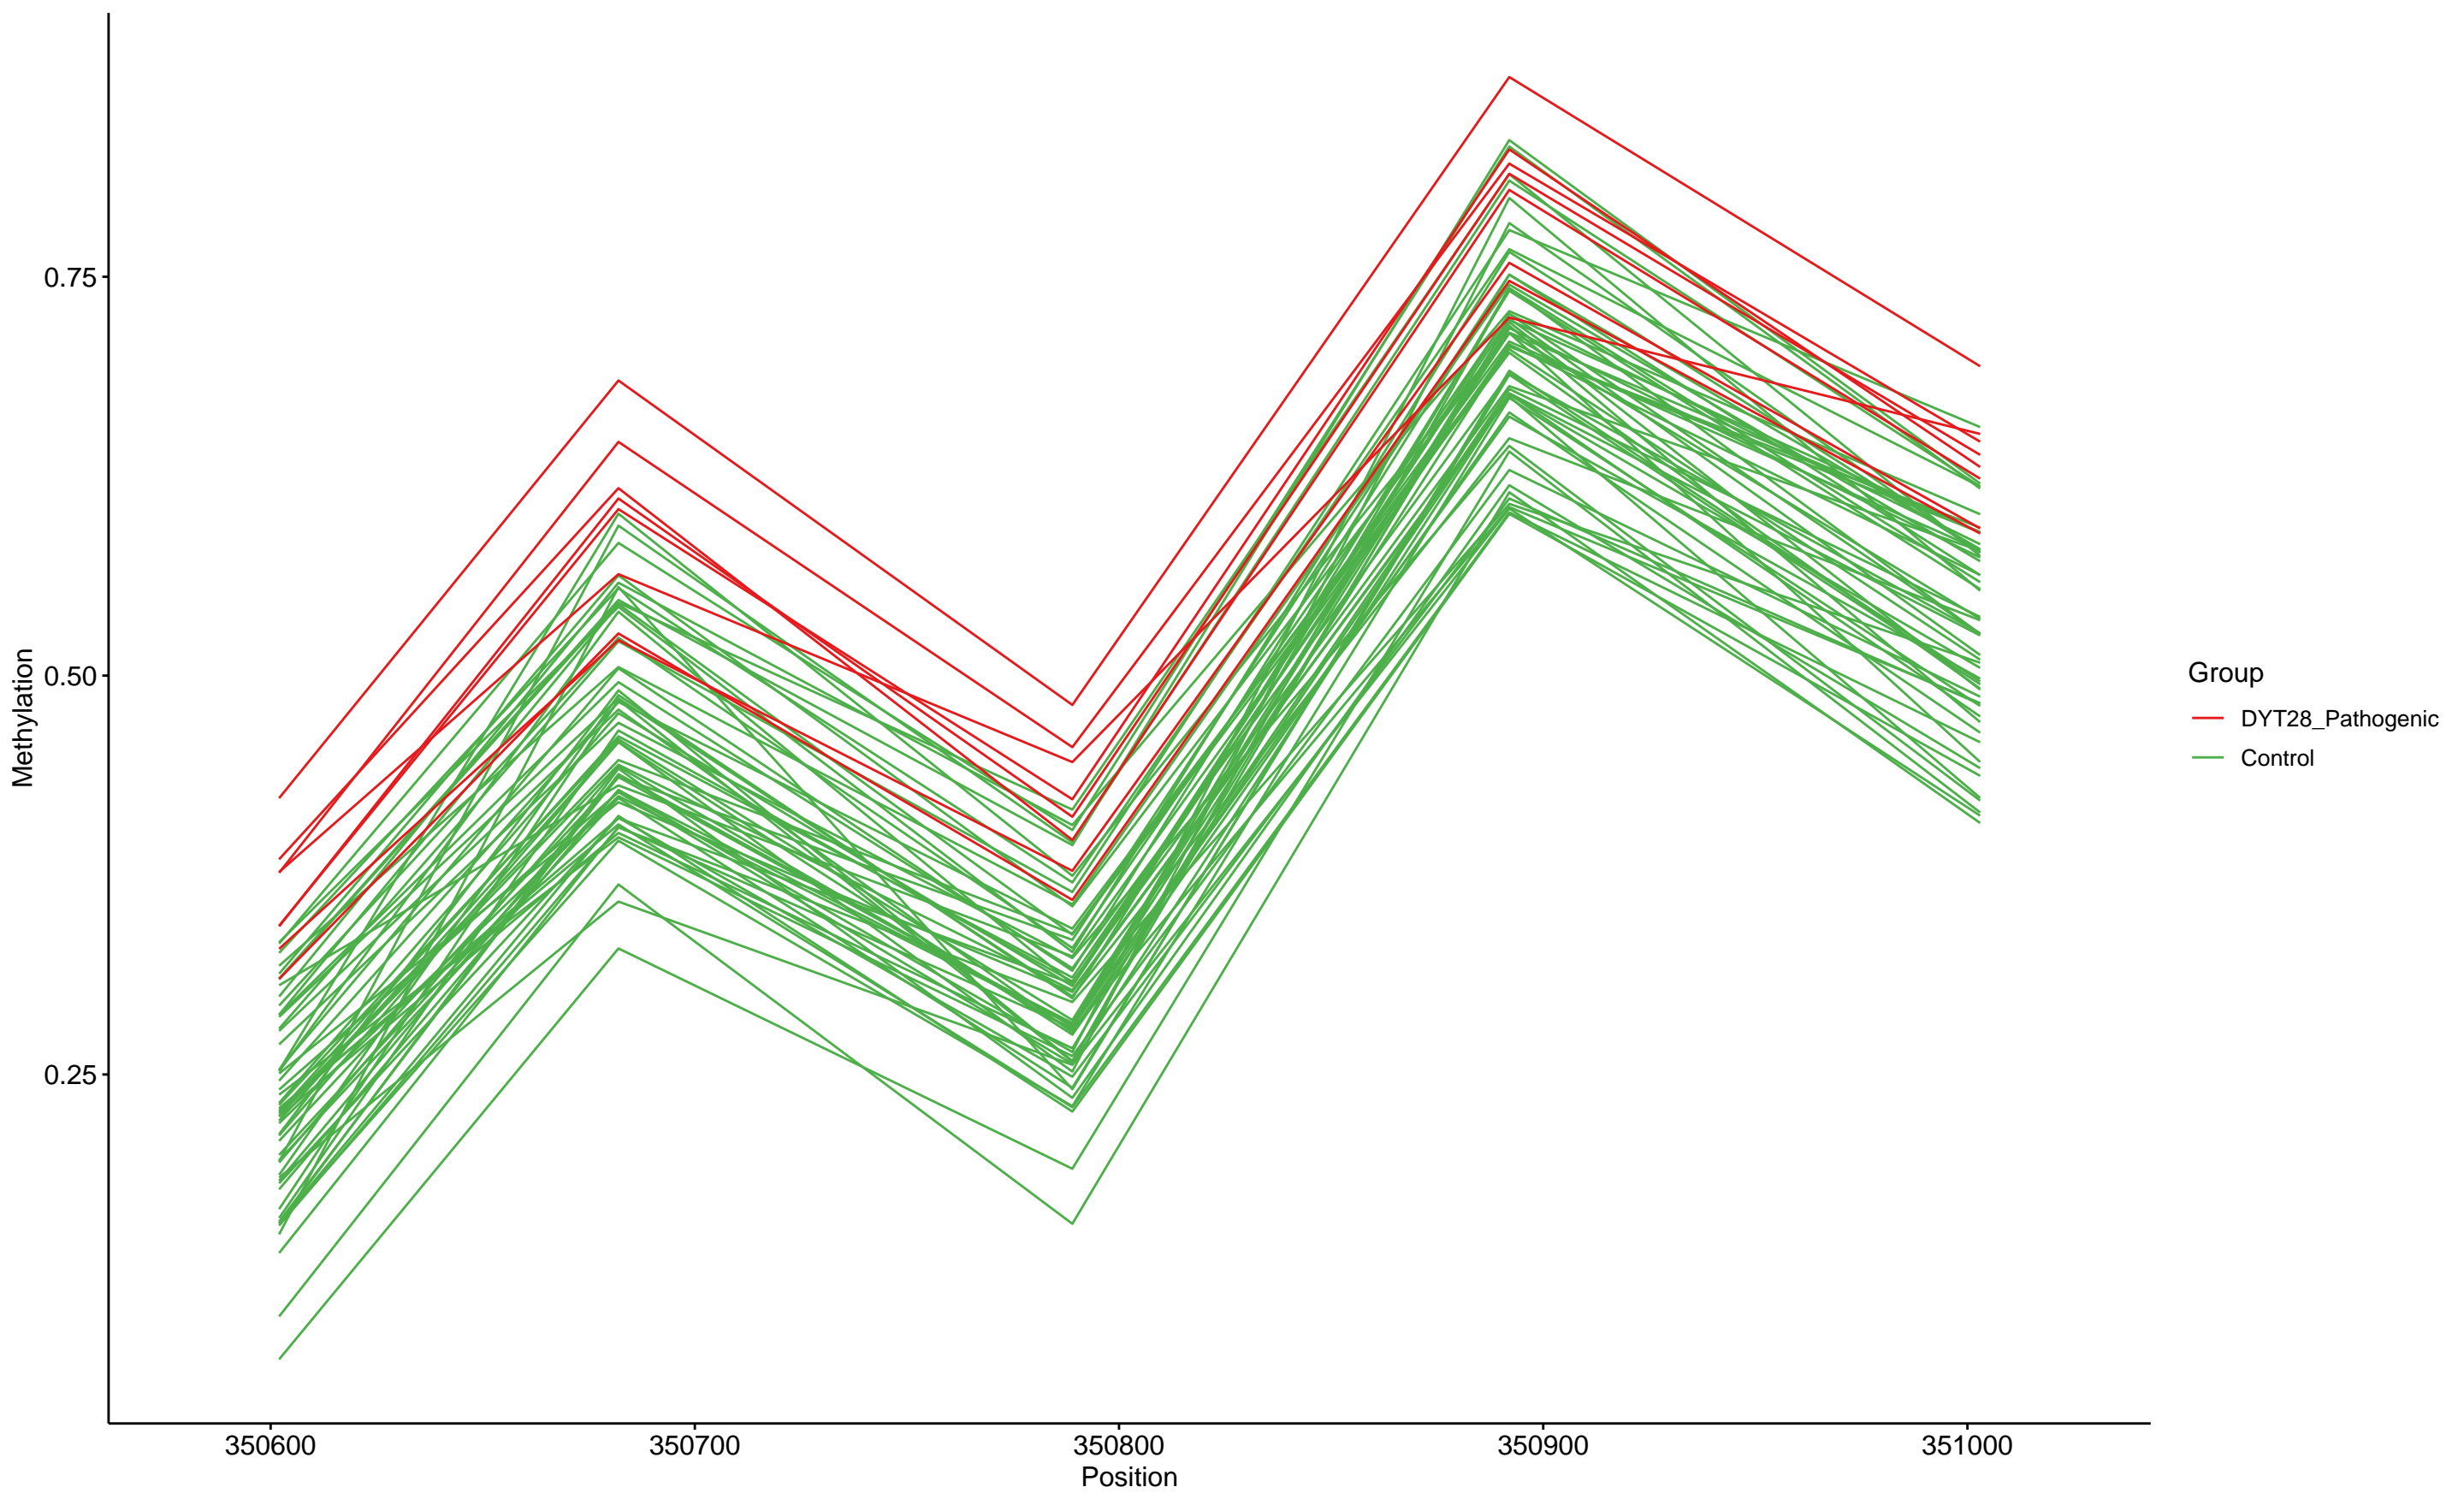

Region 138: chr17:42430376–42432488

Fisher: 1.52381661770405e-15

Stouffer: 3.99779651972259e-14

Mean difference: 0.127490073580688

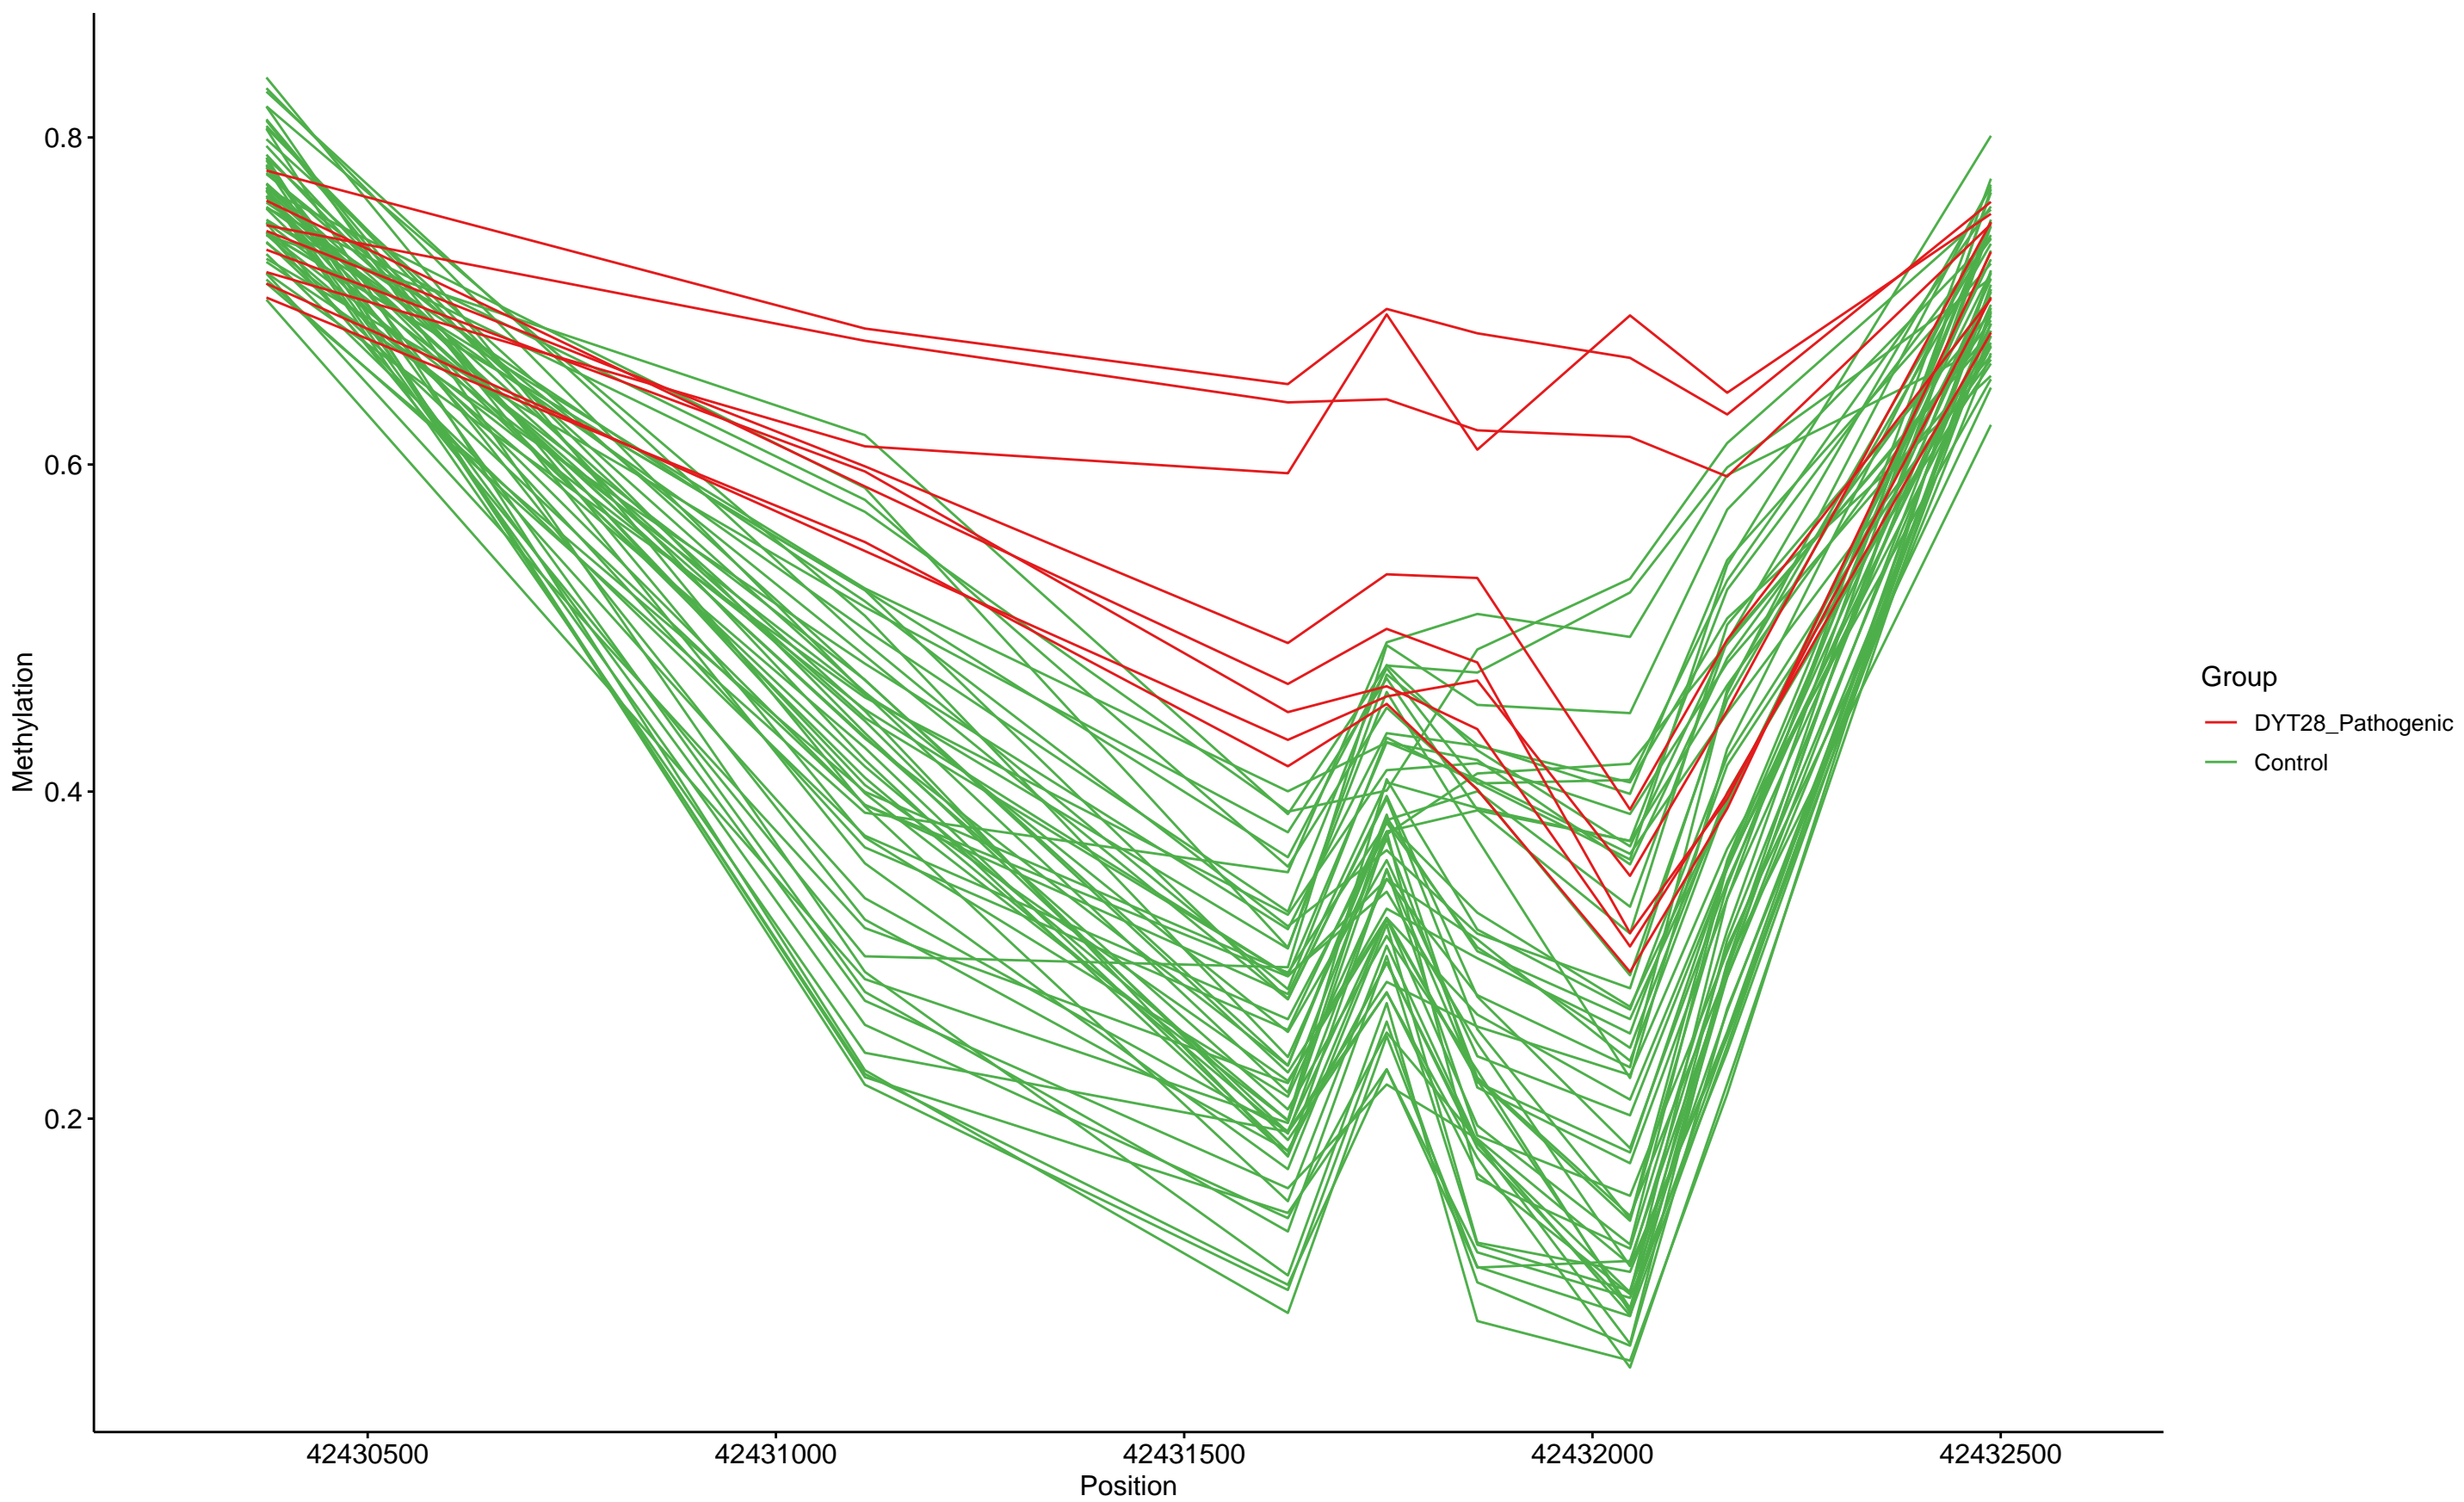



Region 139: chr10:99734081-99735202

Fisher: 1.27630131364963e-14

Stouffer: 9.56538265603274e-17

Mean difference: 0.108836511808559

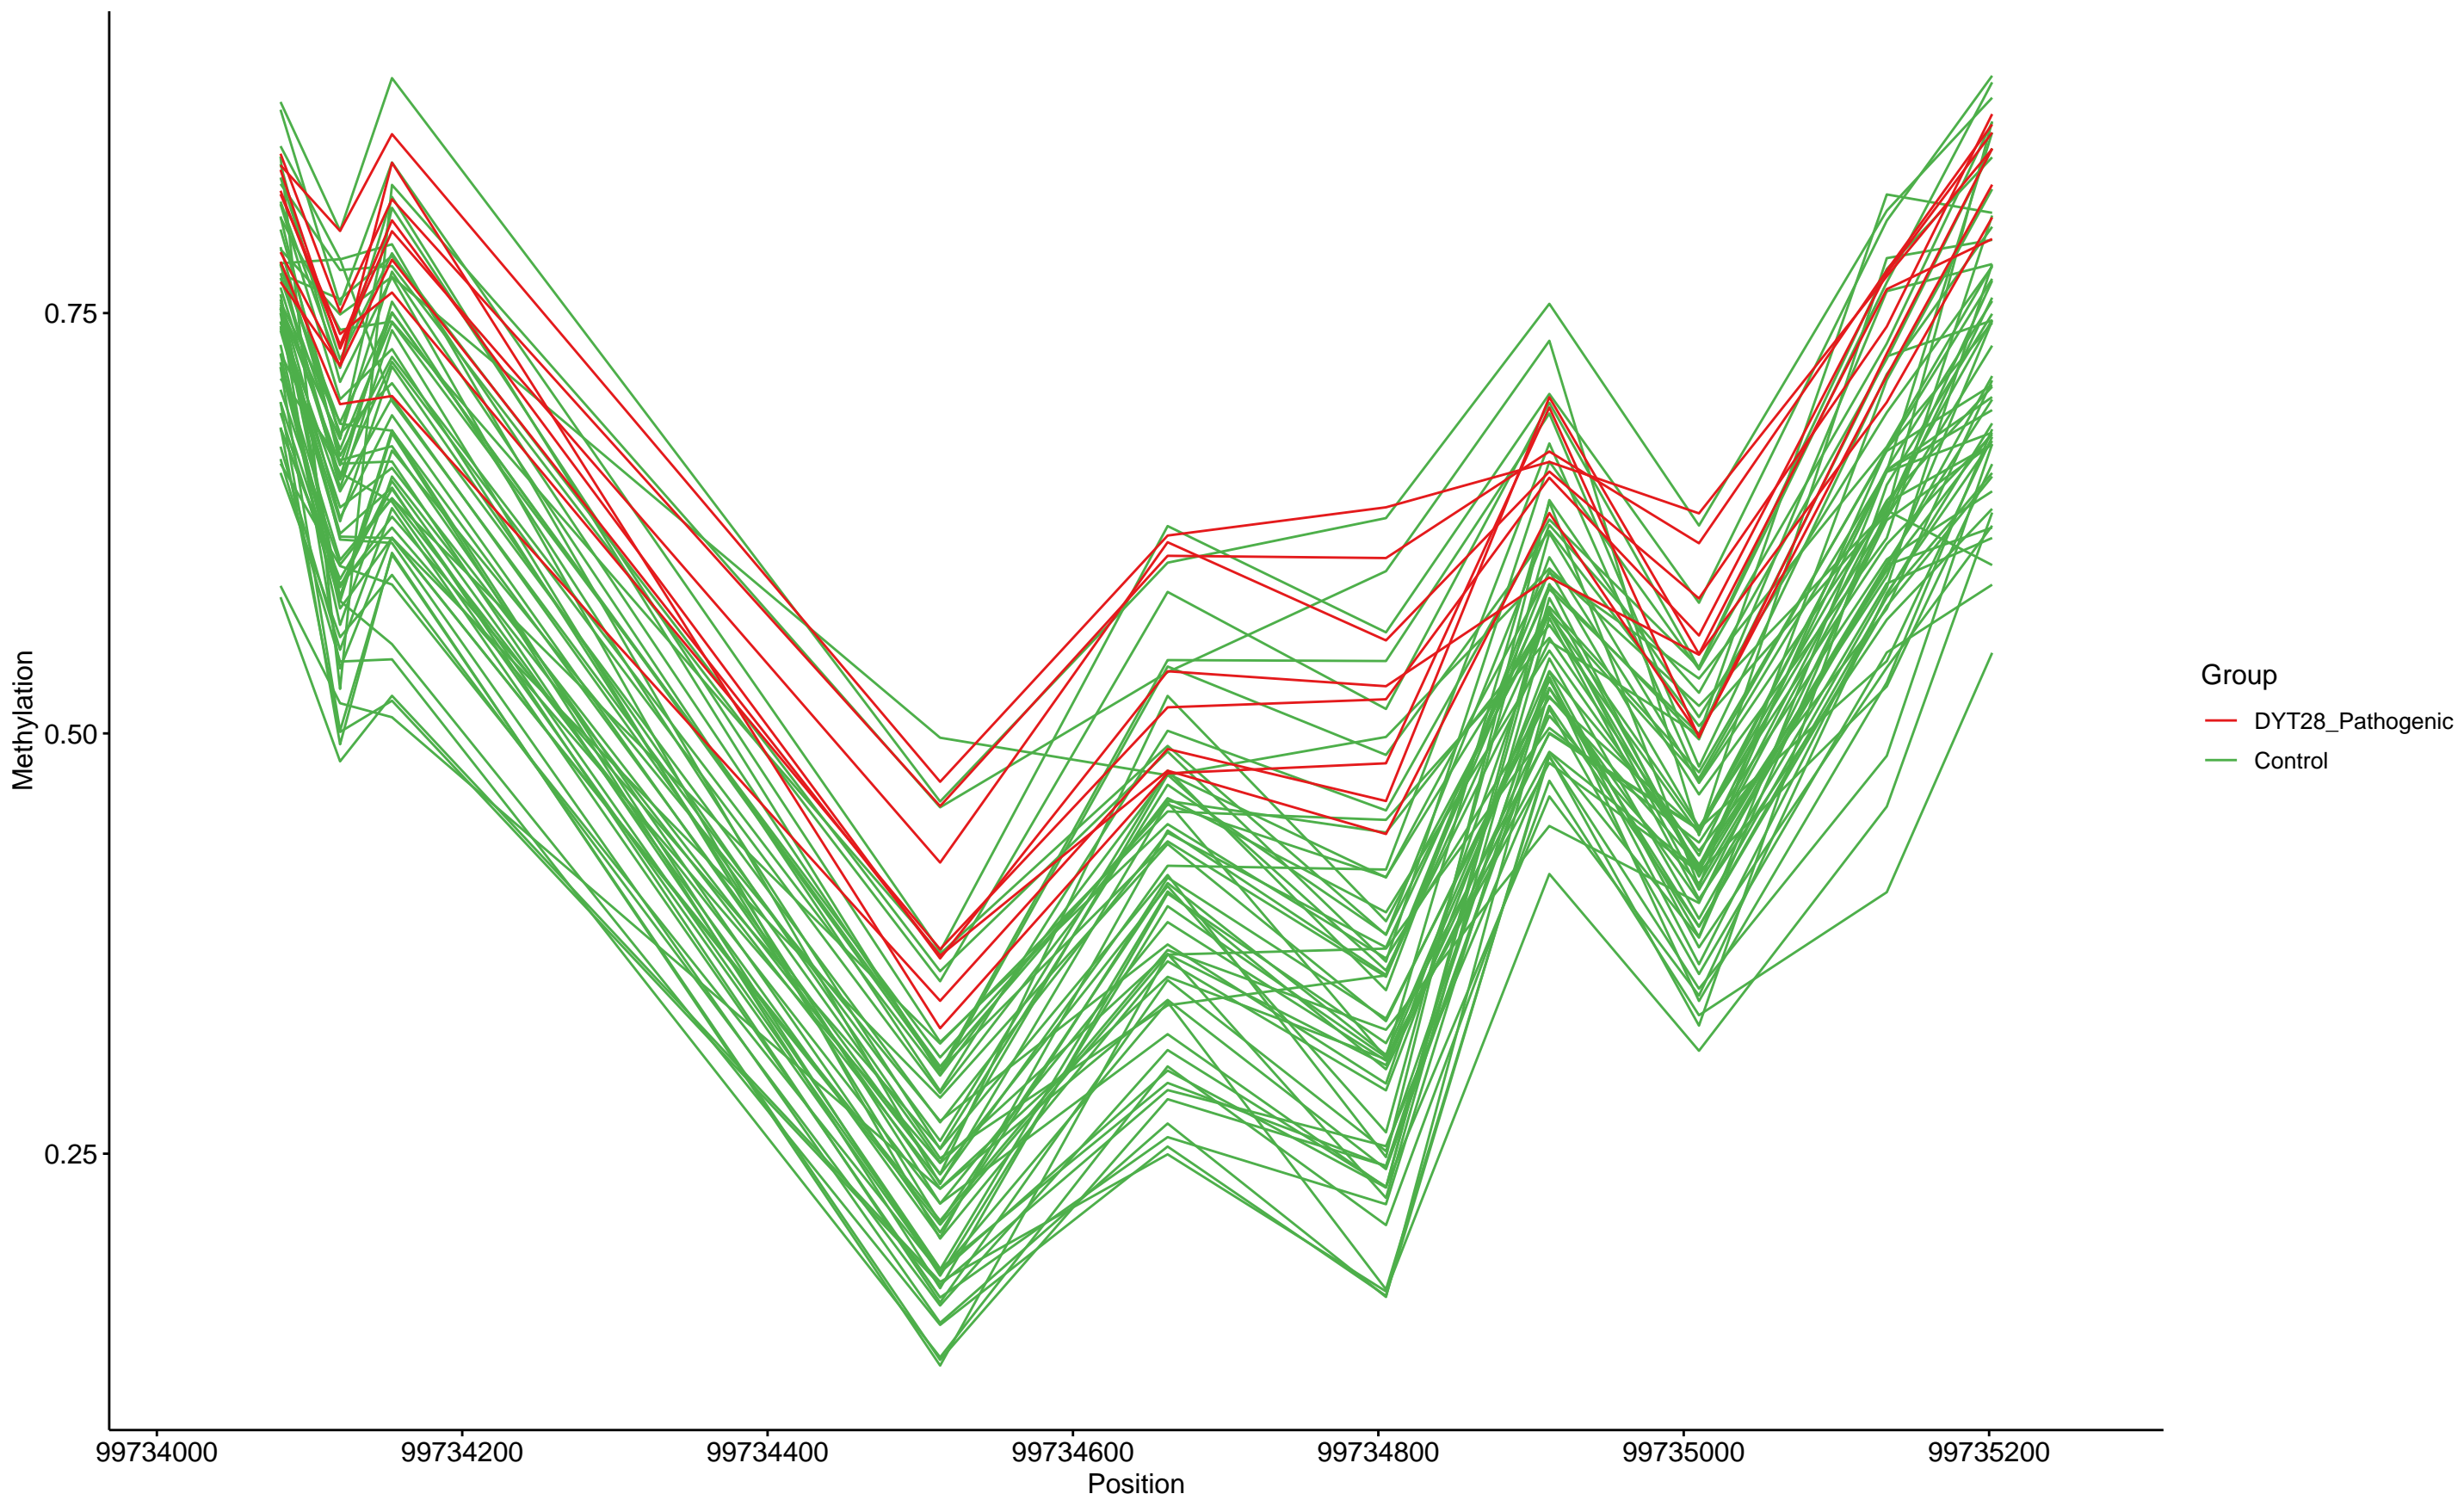

Region 140: chr4:25090198–25090665

Fisher: 8.82471296798307e-14

Stouffer: 1.73596203246899e-15

Mean difference: 0.159078554080391

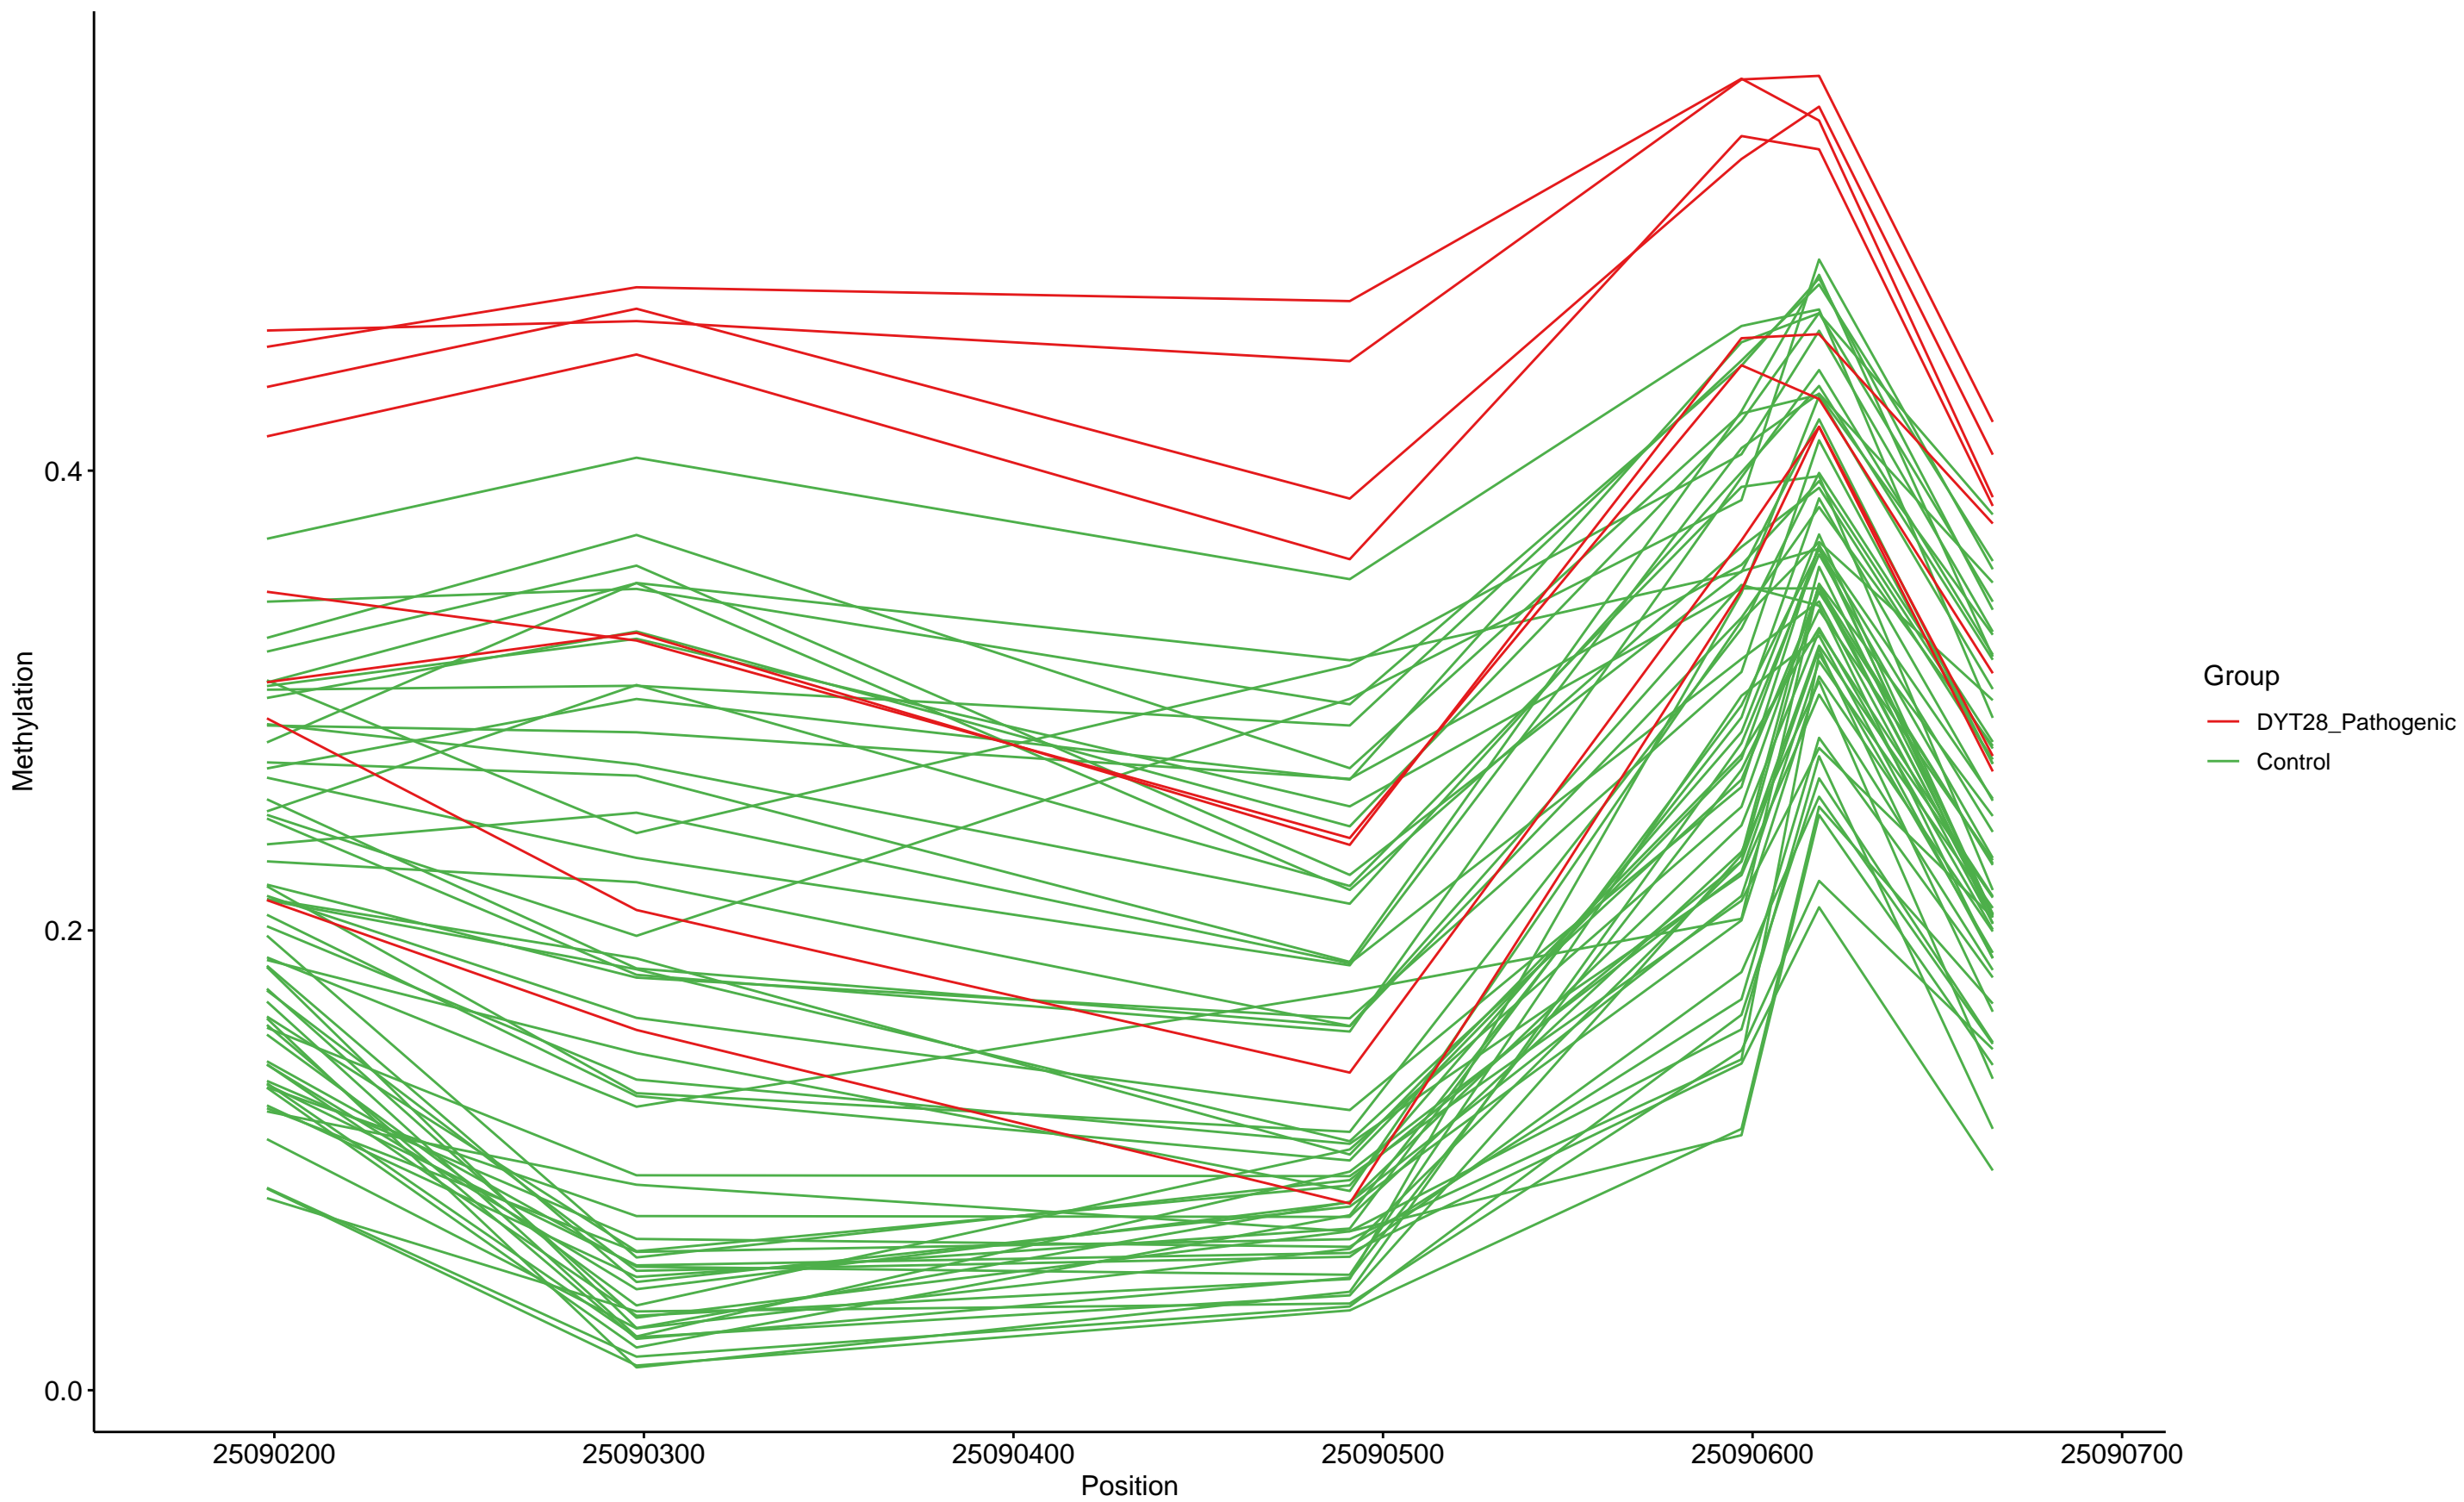

Region 141: chr1:240160972-240162334

Fisher: 5.37366345533256e-13

Stouffer: 1.03700008940576e-09

Mean difference: 0.126438611926371

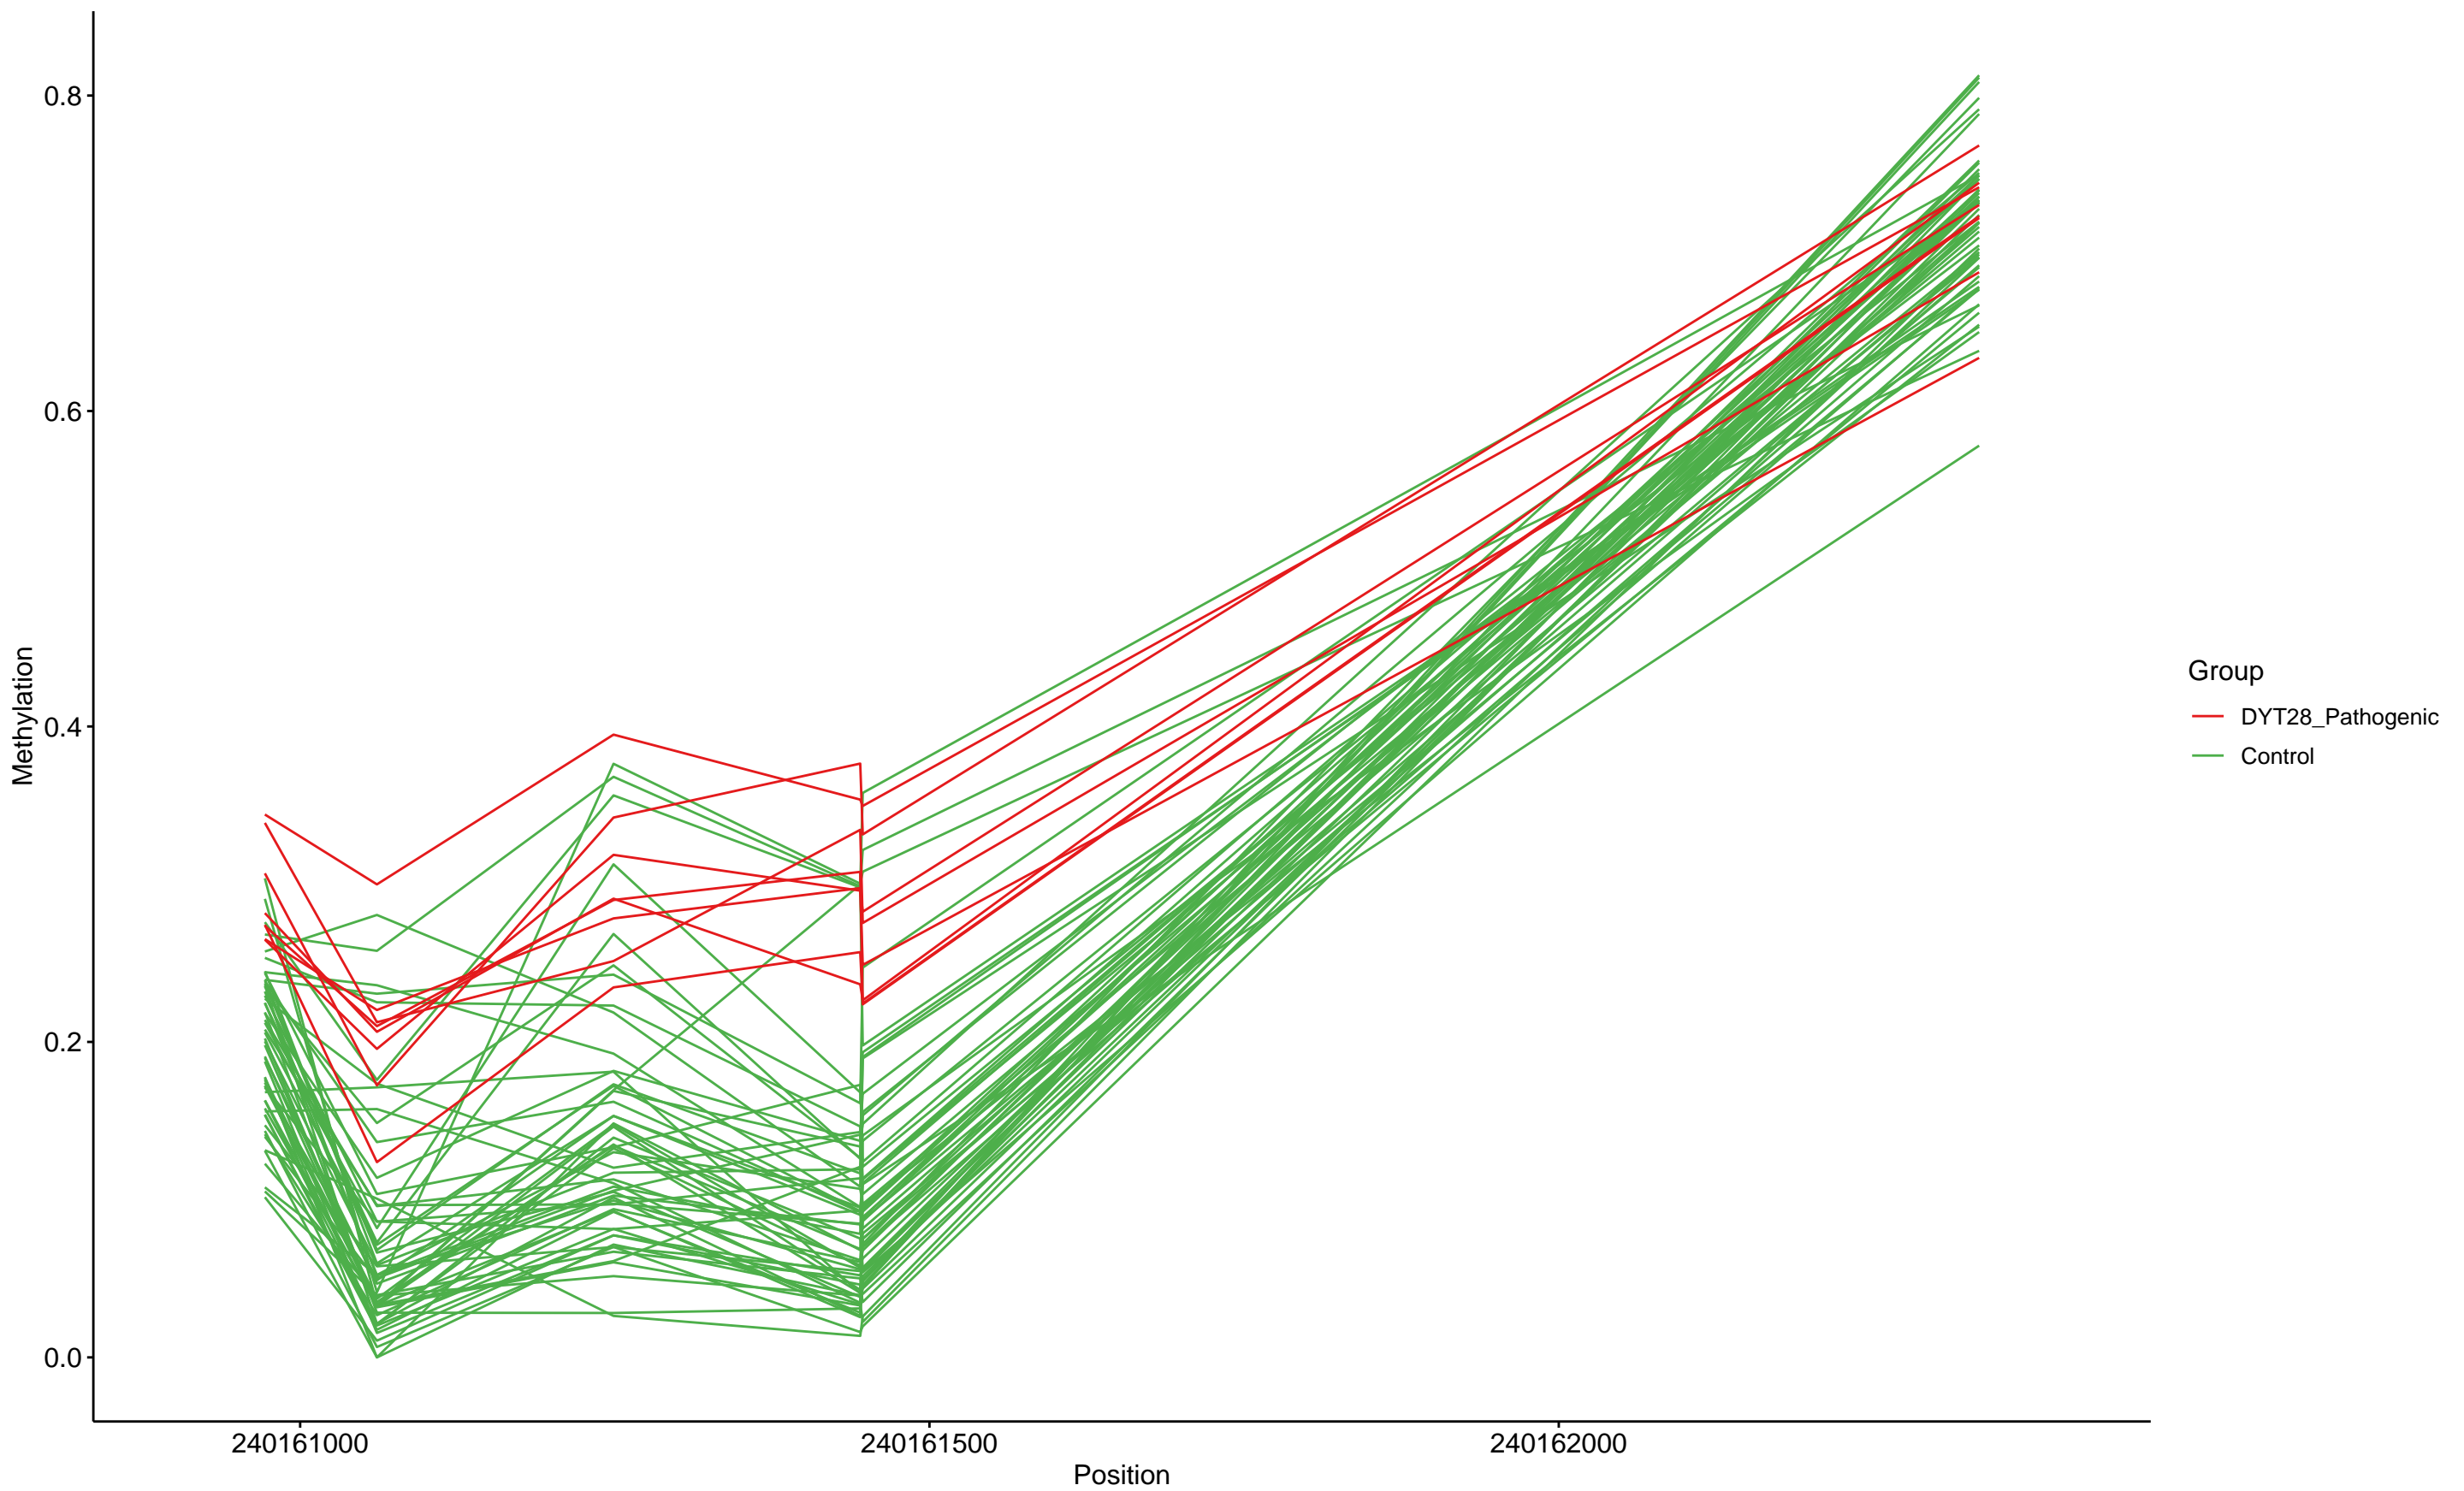



Region 142: chr19:852288–853540

Fisher:  $6.2731351192419 \times 10^{-13}$

Stouffer:  $1.35109834086241 \times 10^{-10}$

Mean difference: 0.1048884892935

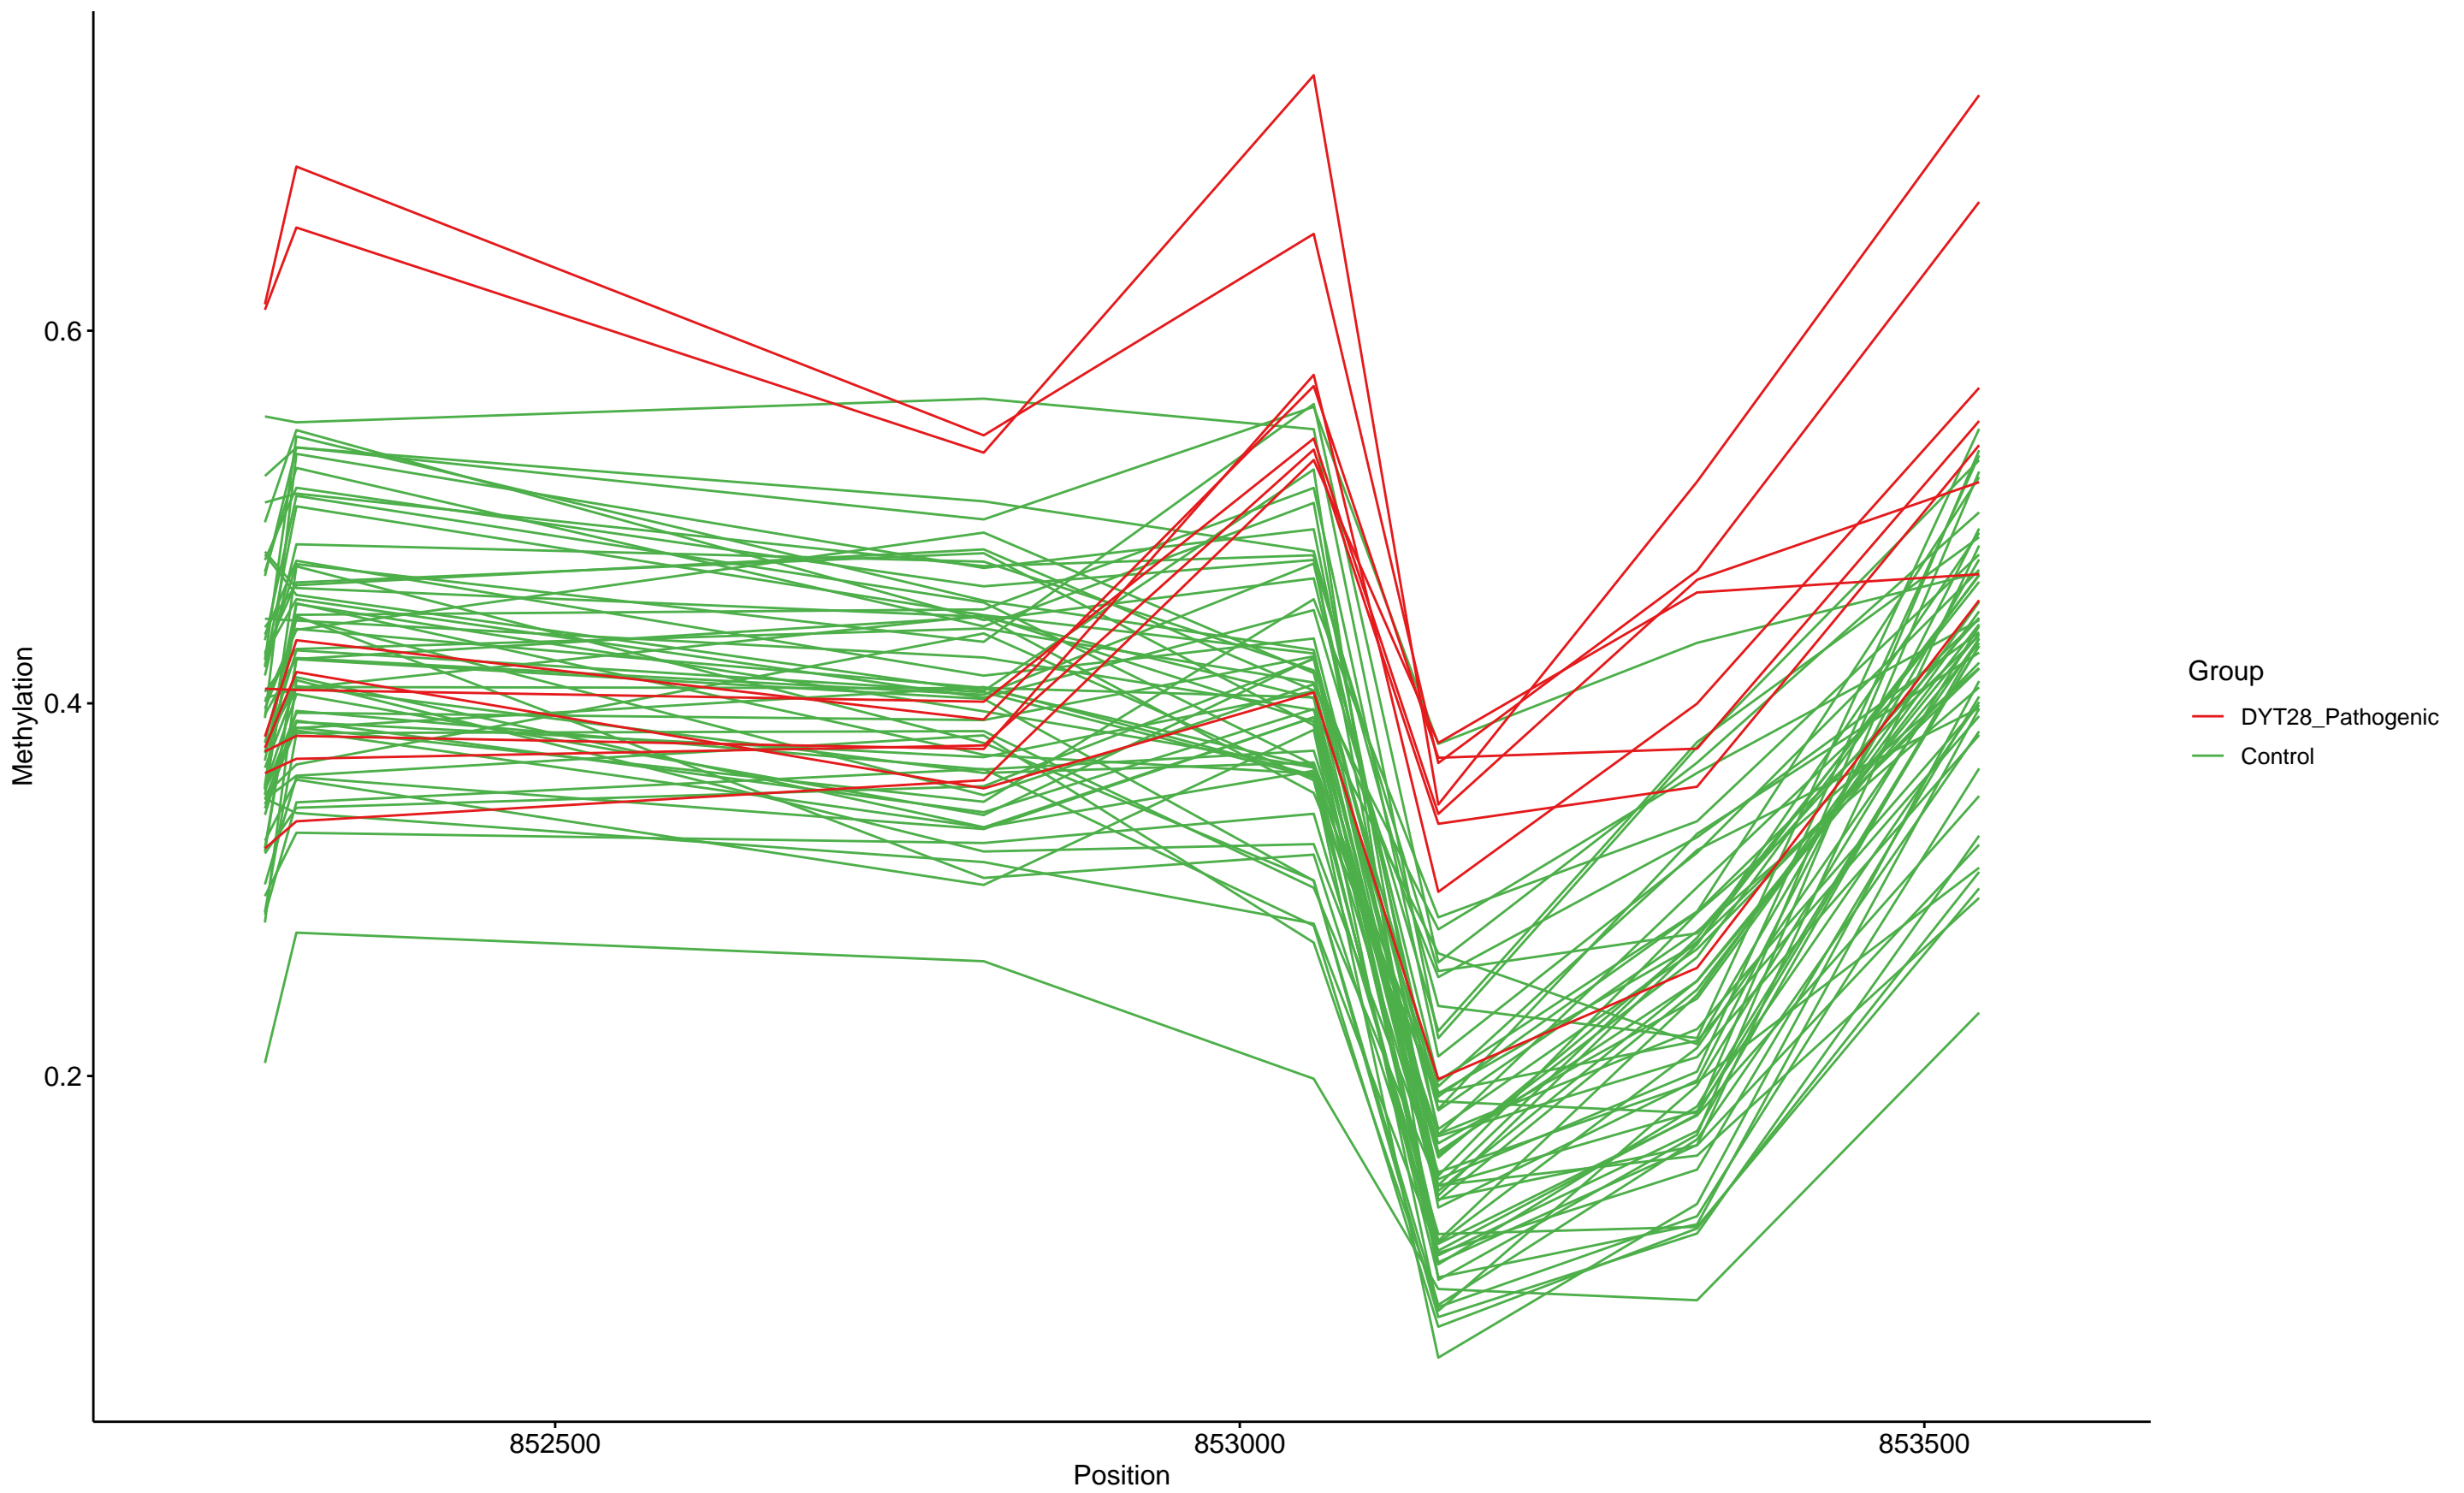

Region 143: chr7:51538921–51539678

Fisher:  $1.7382148099561 \times 10^{-12}$

Stouffer:  $3.16704599355341 \times 10^{-14}$

Mean difference: 0.100872114885186

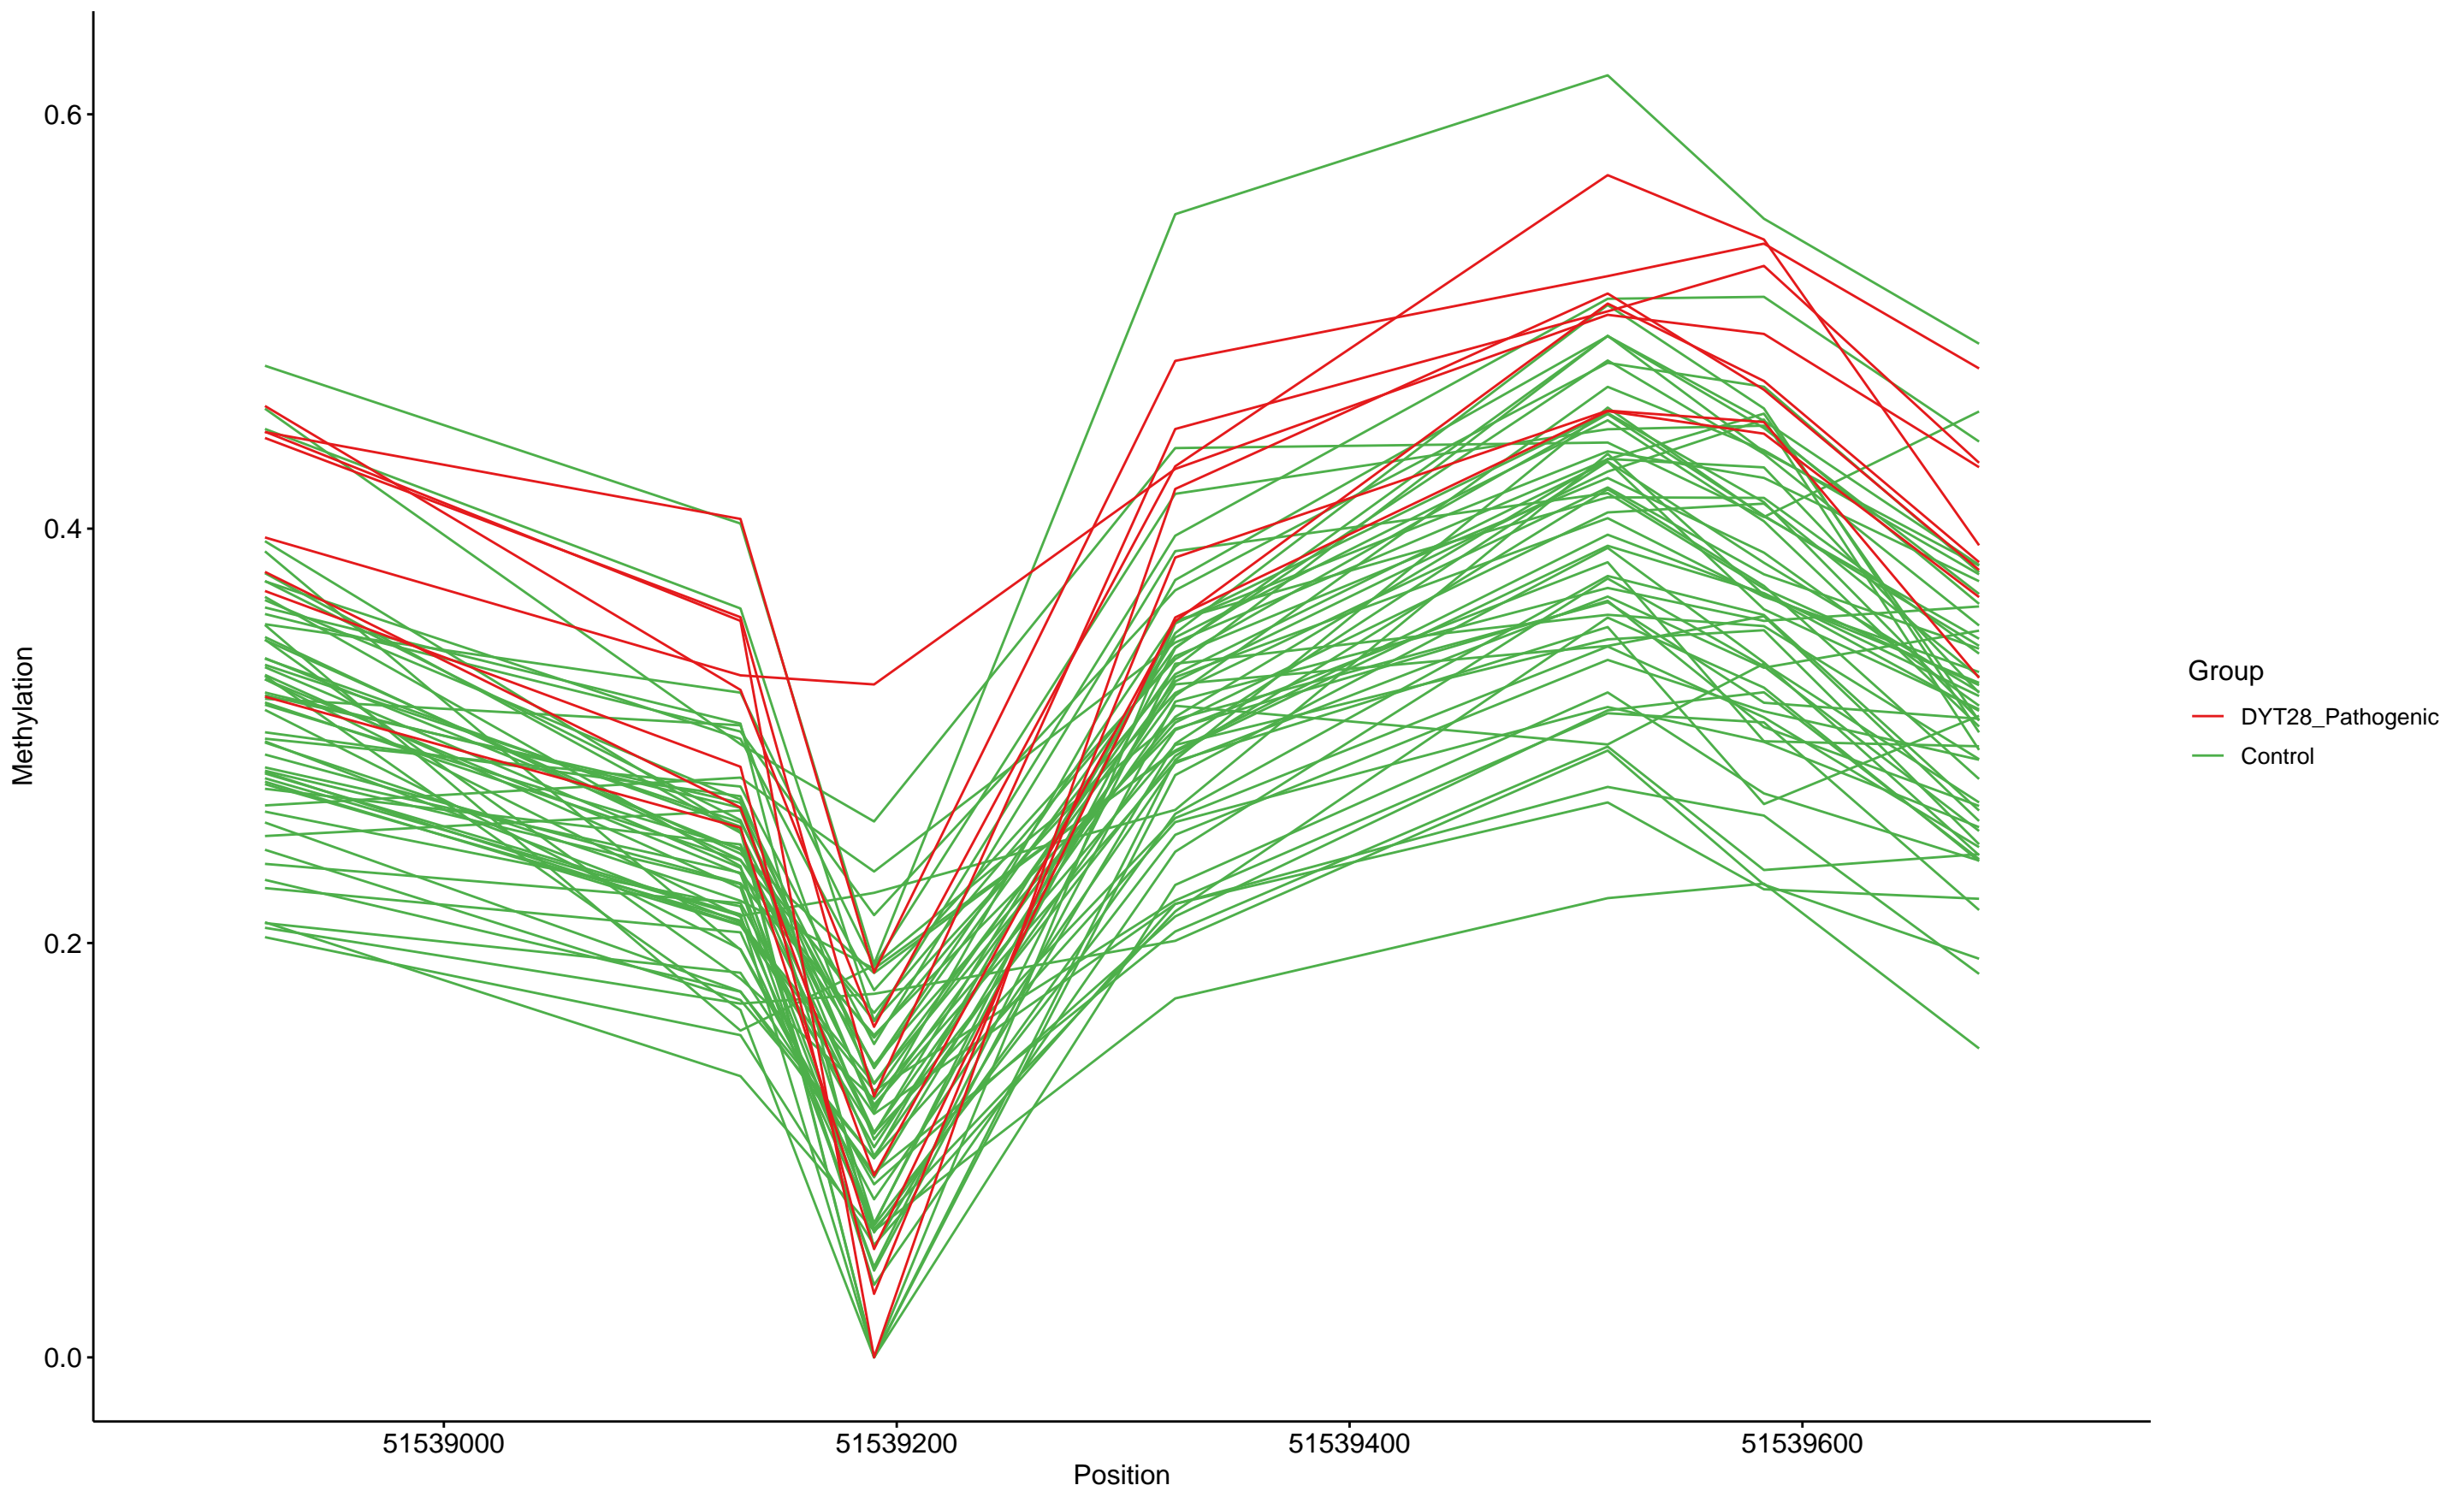

Region 144: chr2:115419729–115420260

Fisher: 1.01795188857161e-10

Stouffer: 7.85238768254868e-12

Mean difference: 0.113733078037168

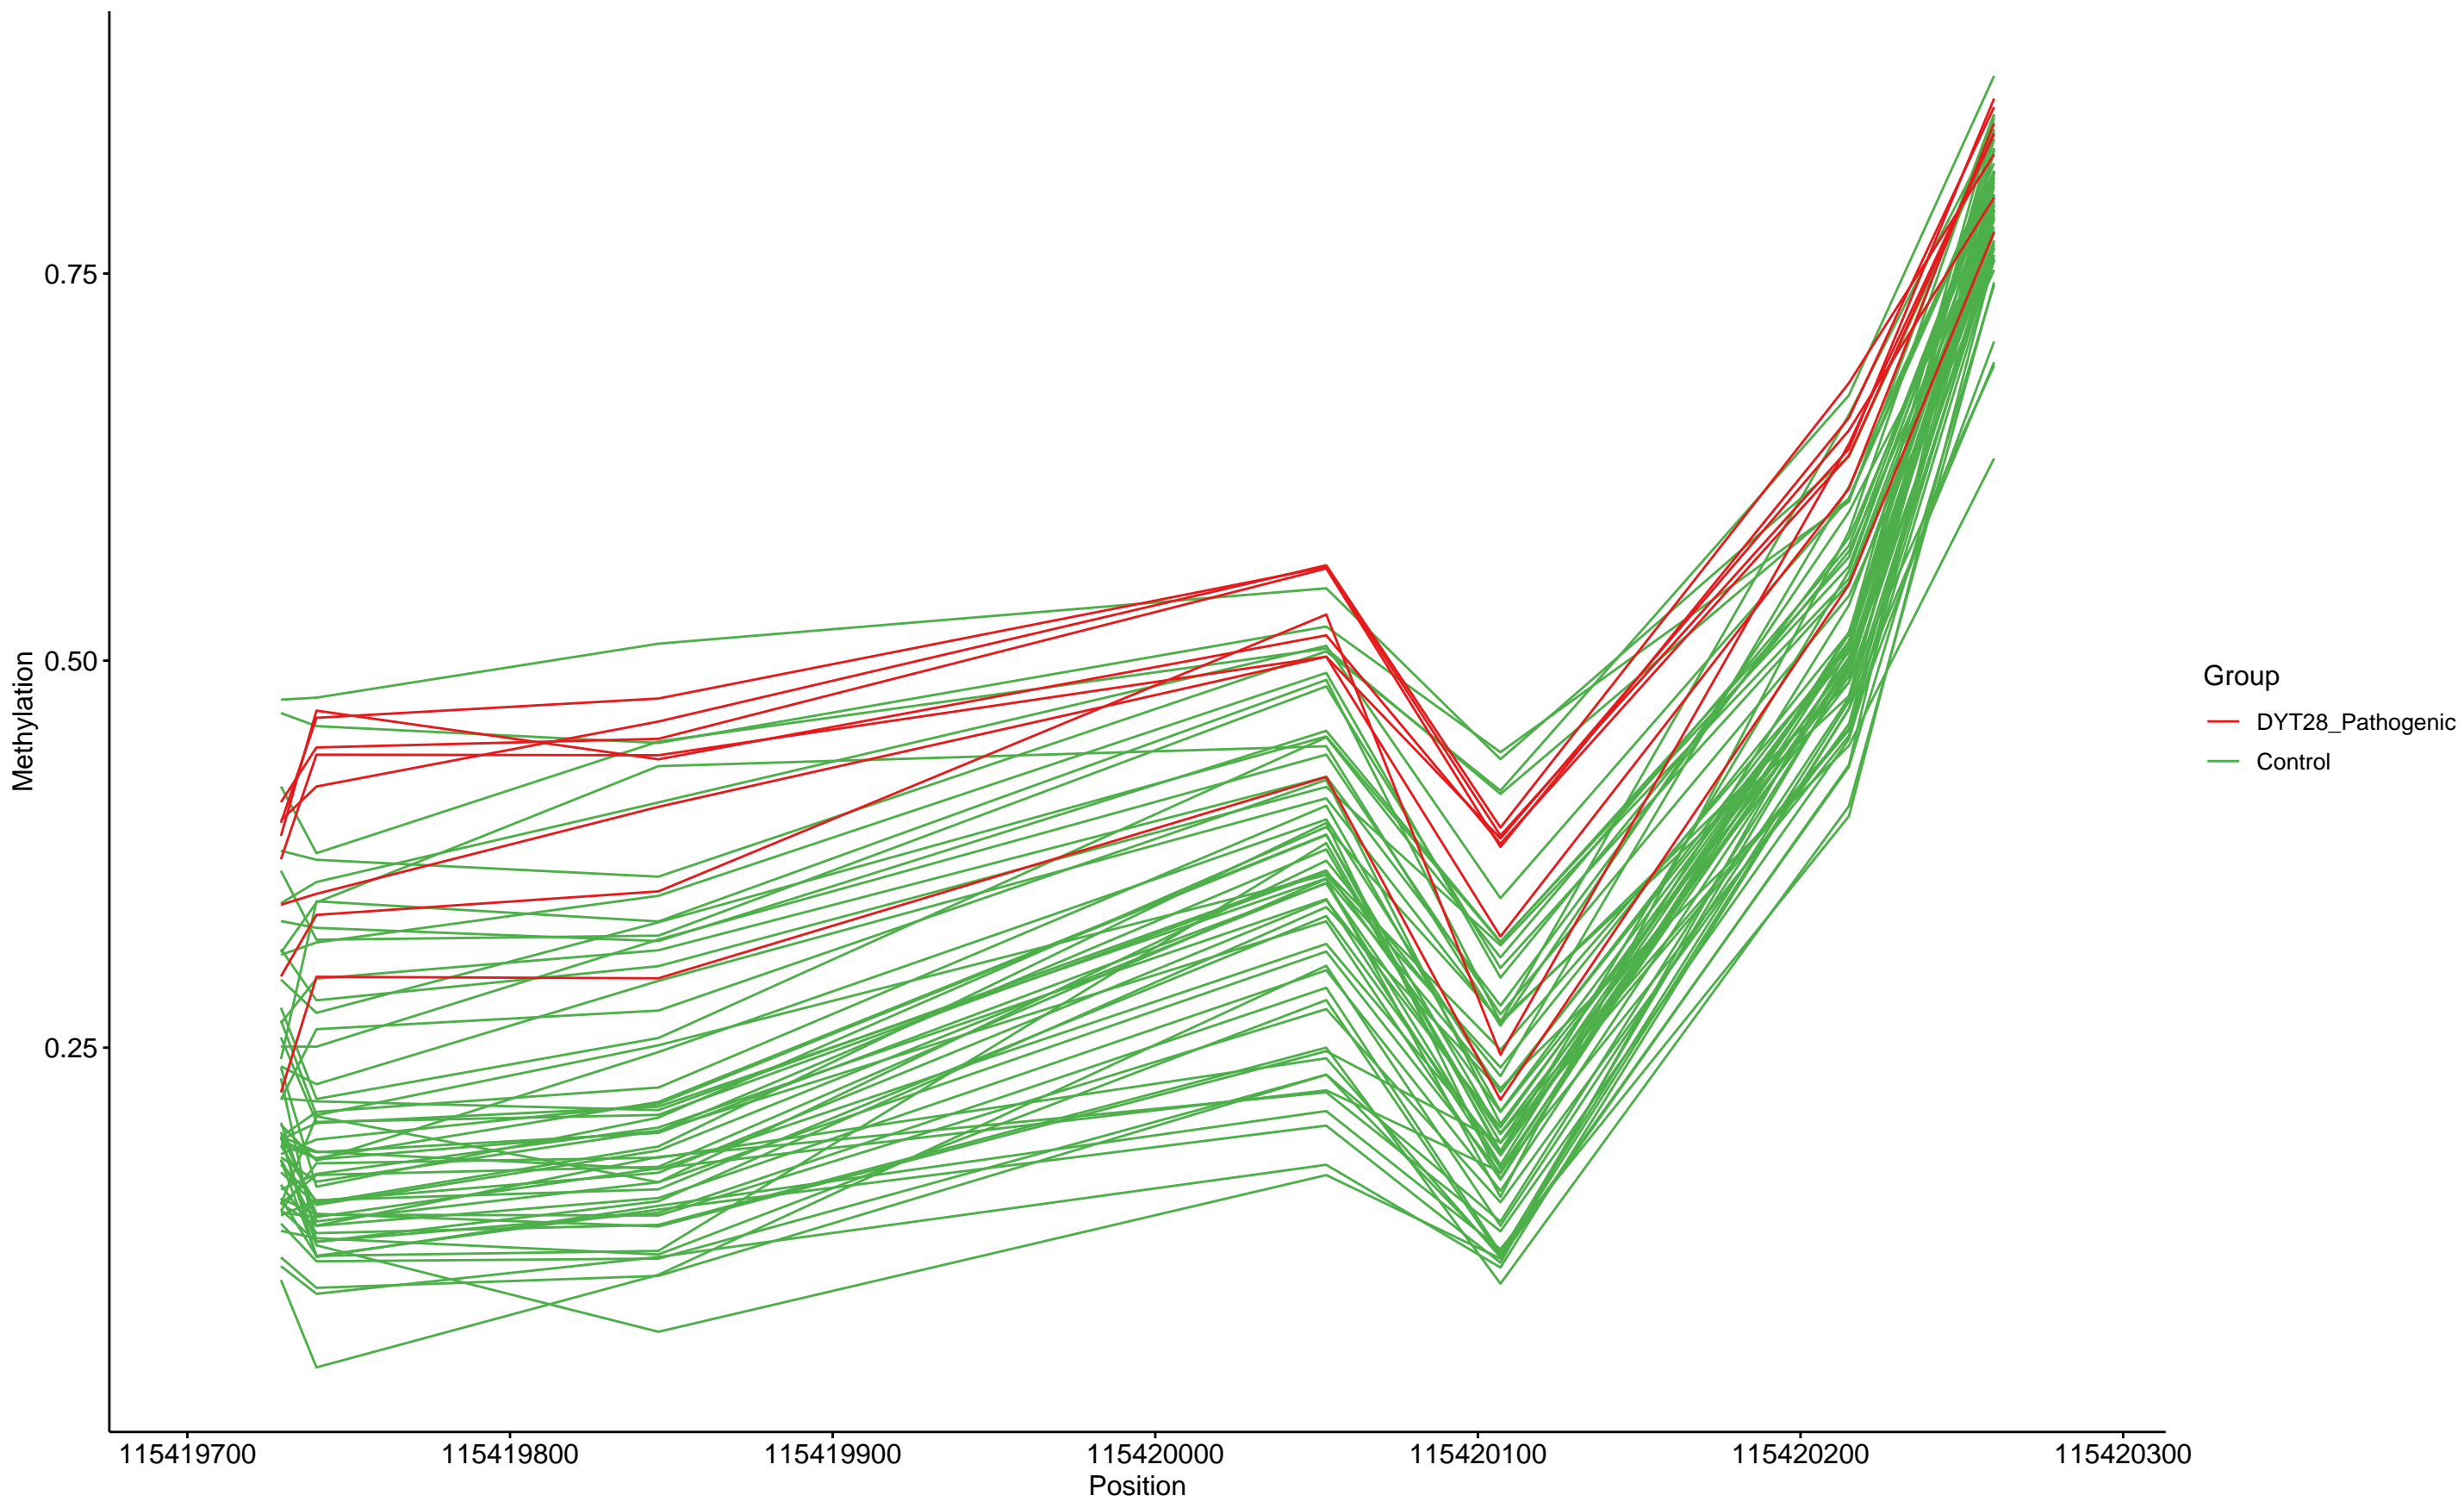



Region 145: chr21:40759534-40759694

Fisher: 2.02999707872593e-08

Stouffer: 9.30504074789941e-10

Mean difference: 0.110219430526785

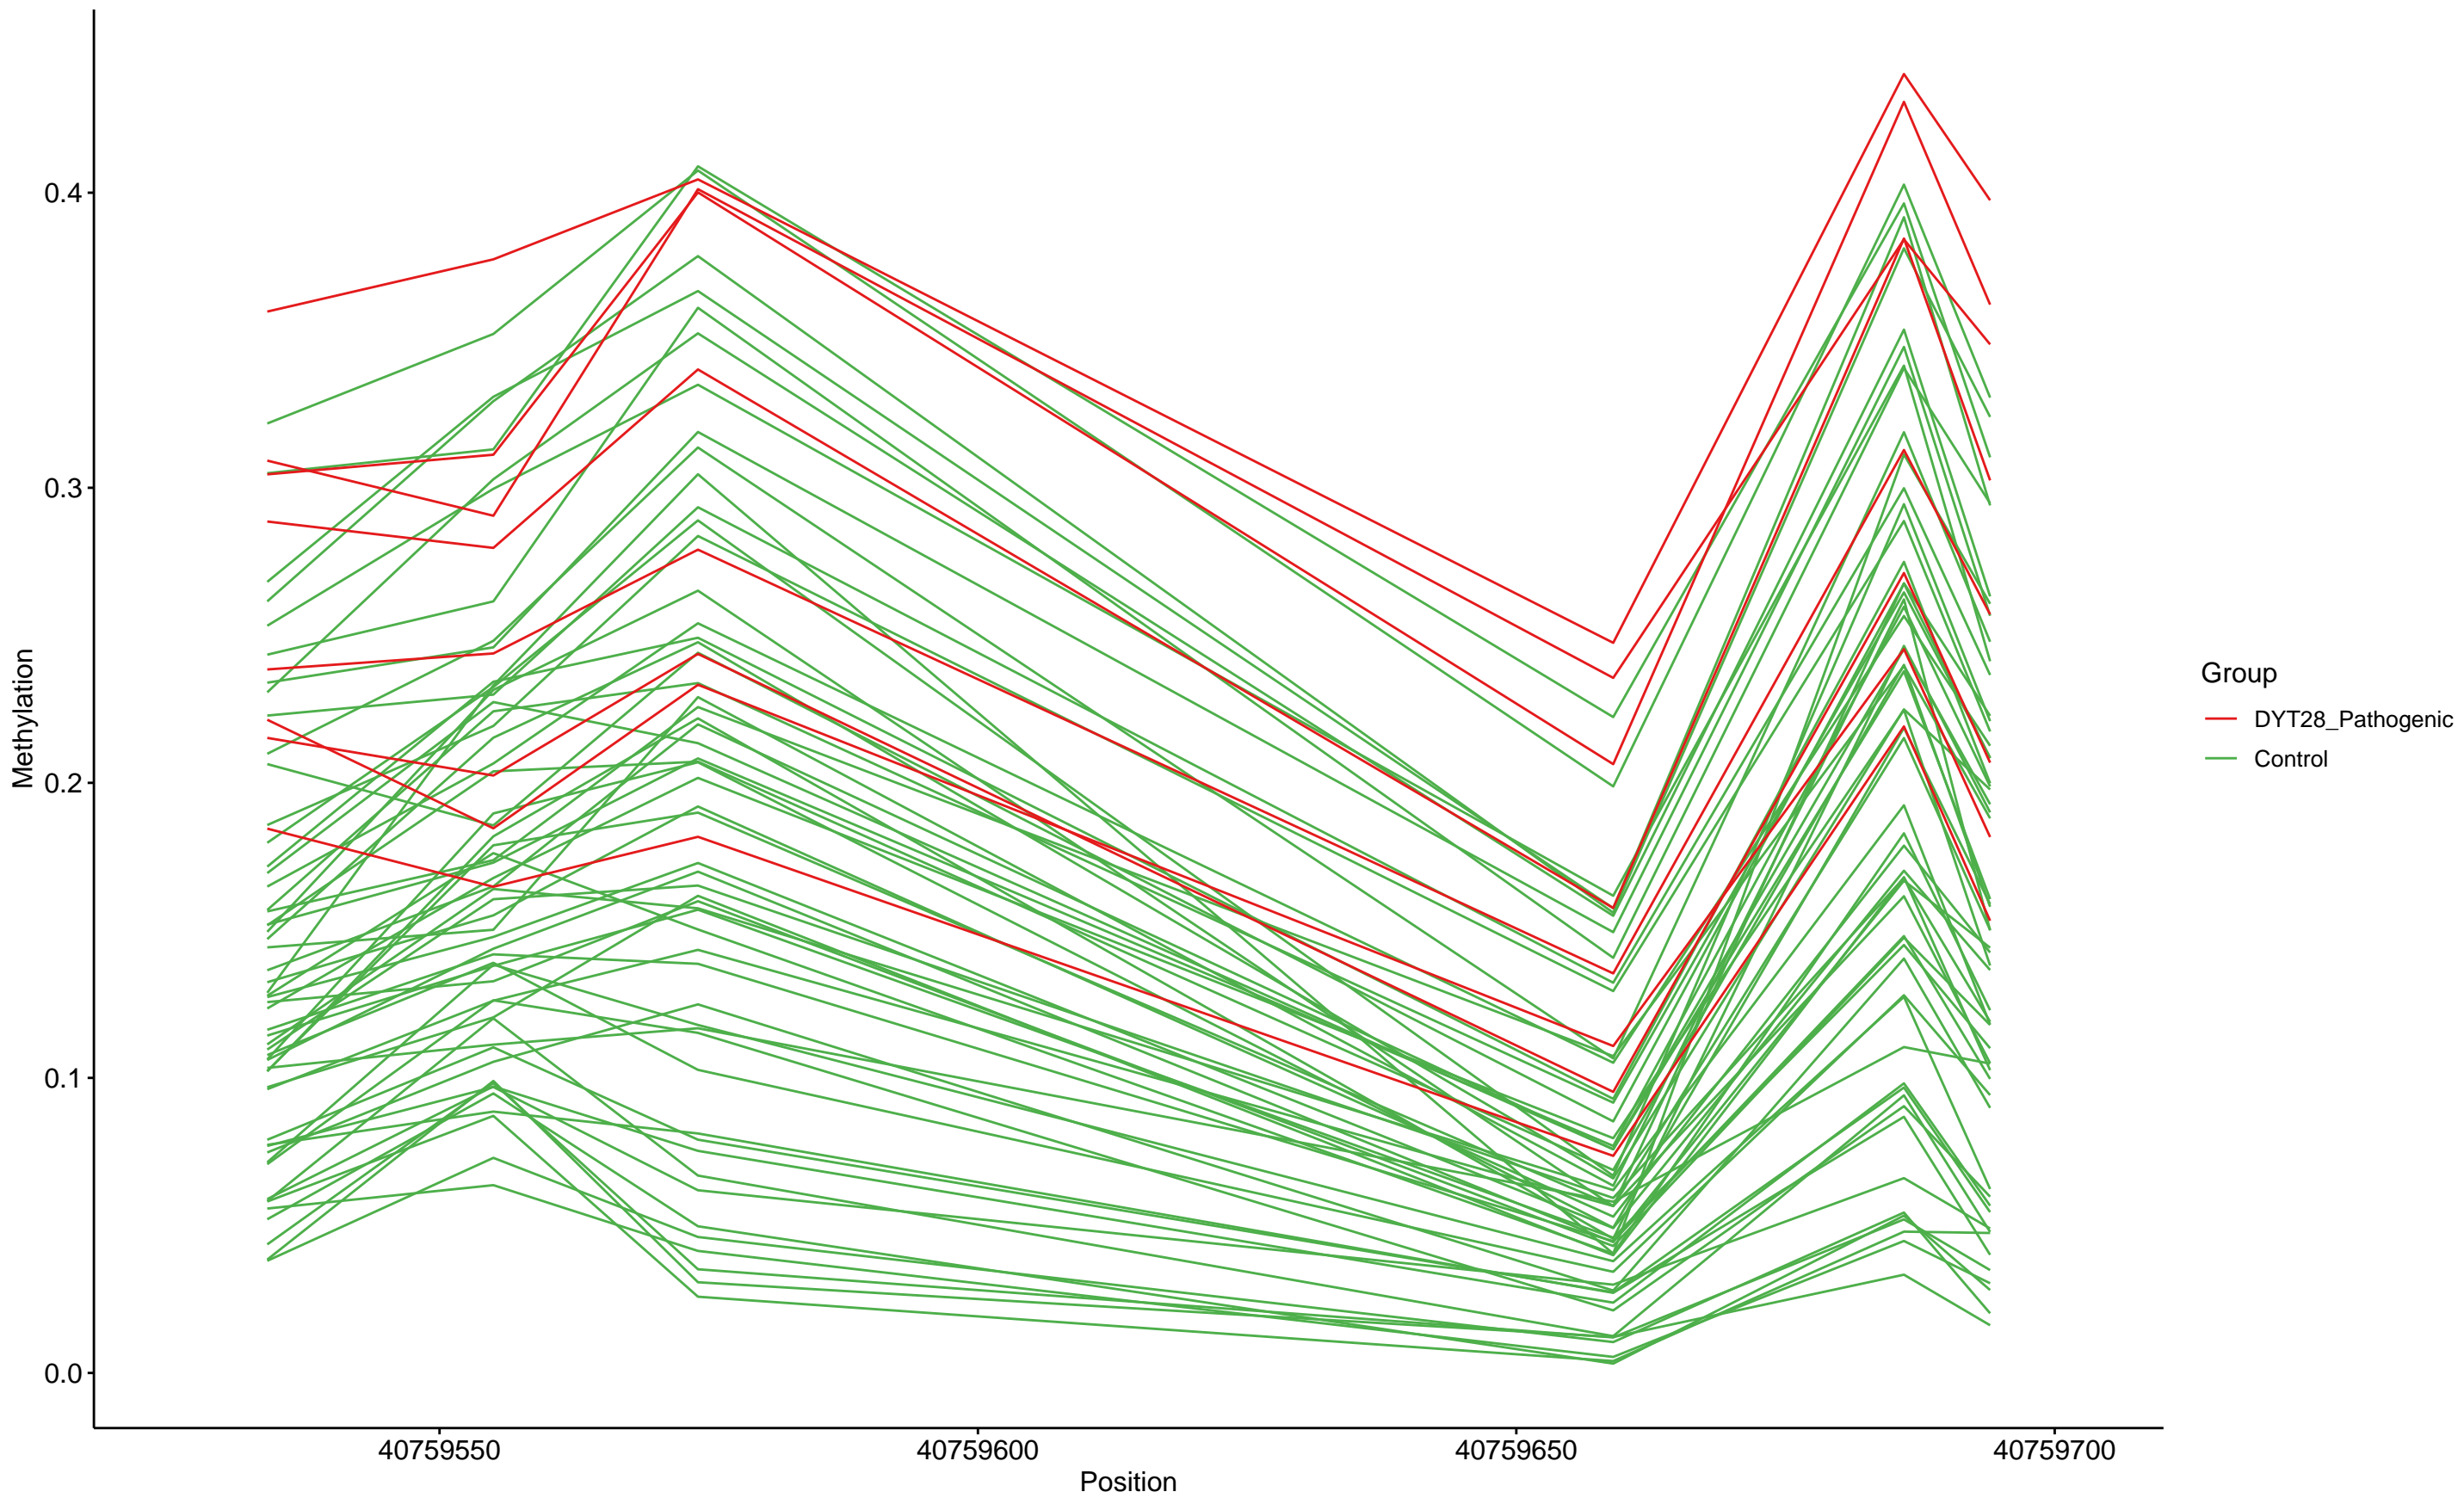

Region 146: chr7:158045980–158046358

Fisher: 4.10045827357668e-08

Stouffer: 3.69678808176895e-09

Mean difference: -0.103719076079815

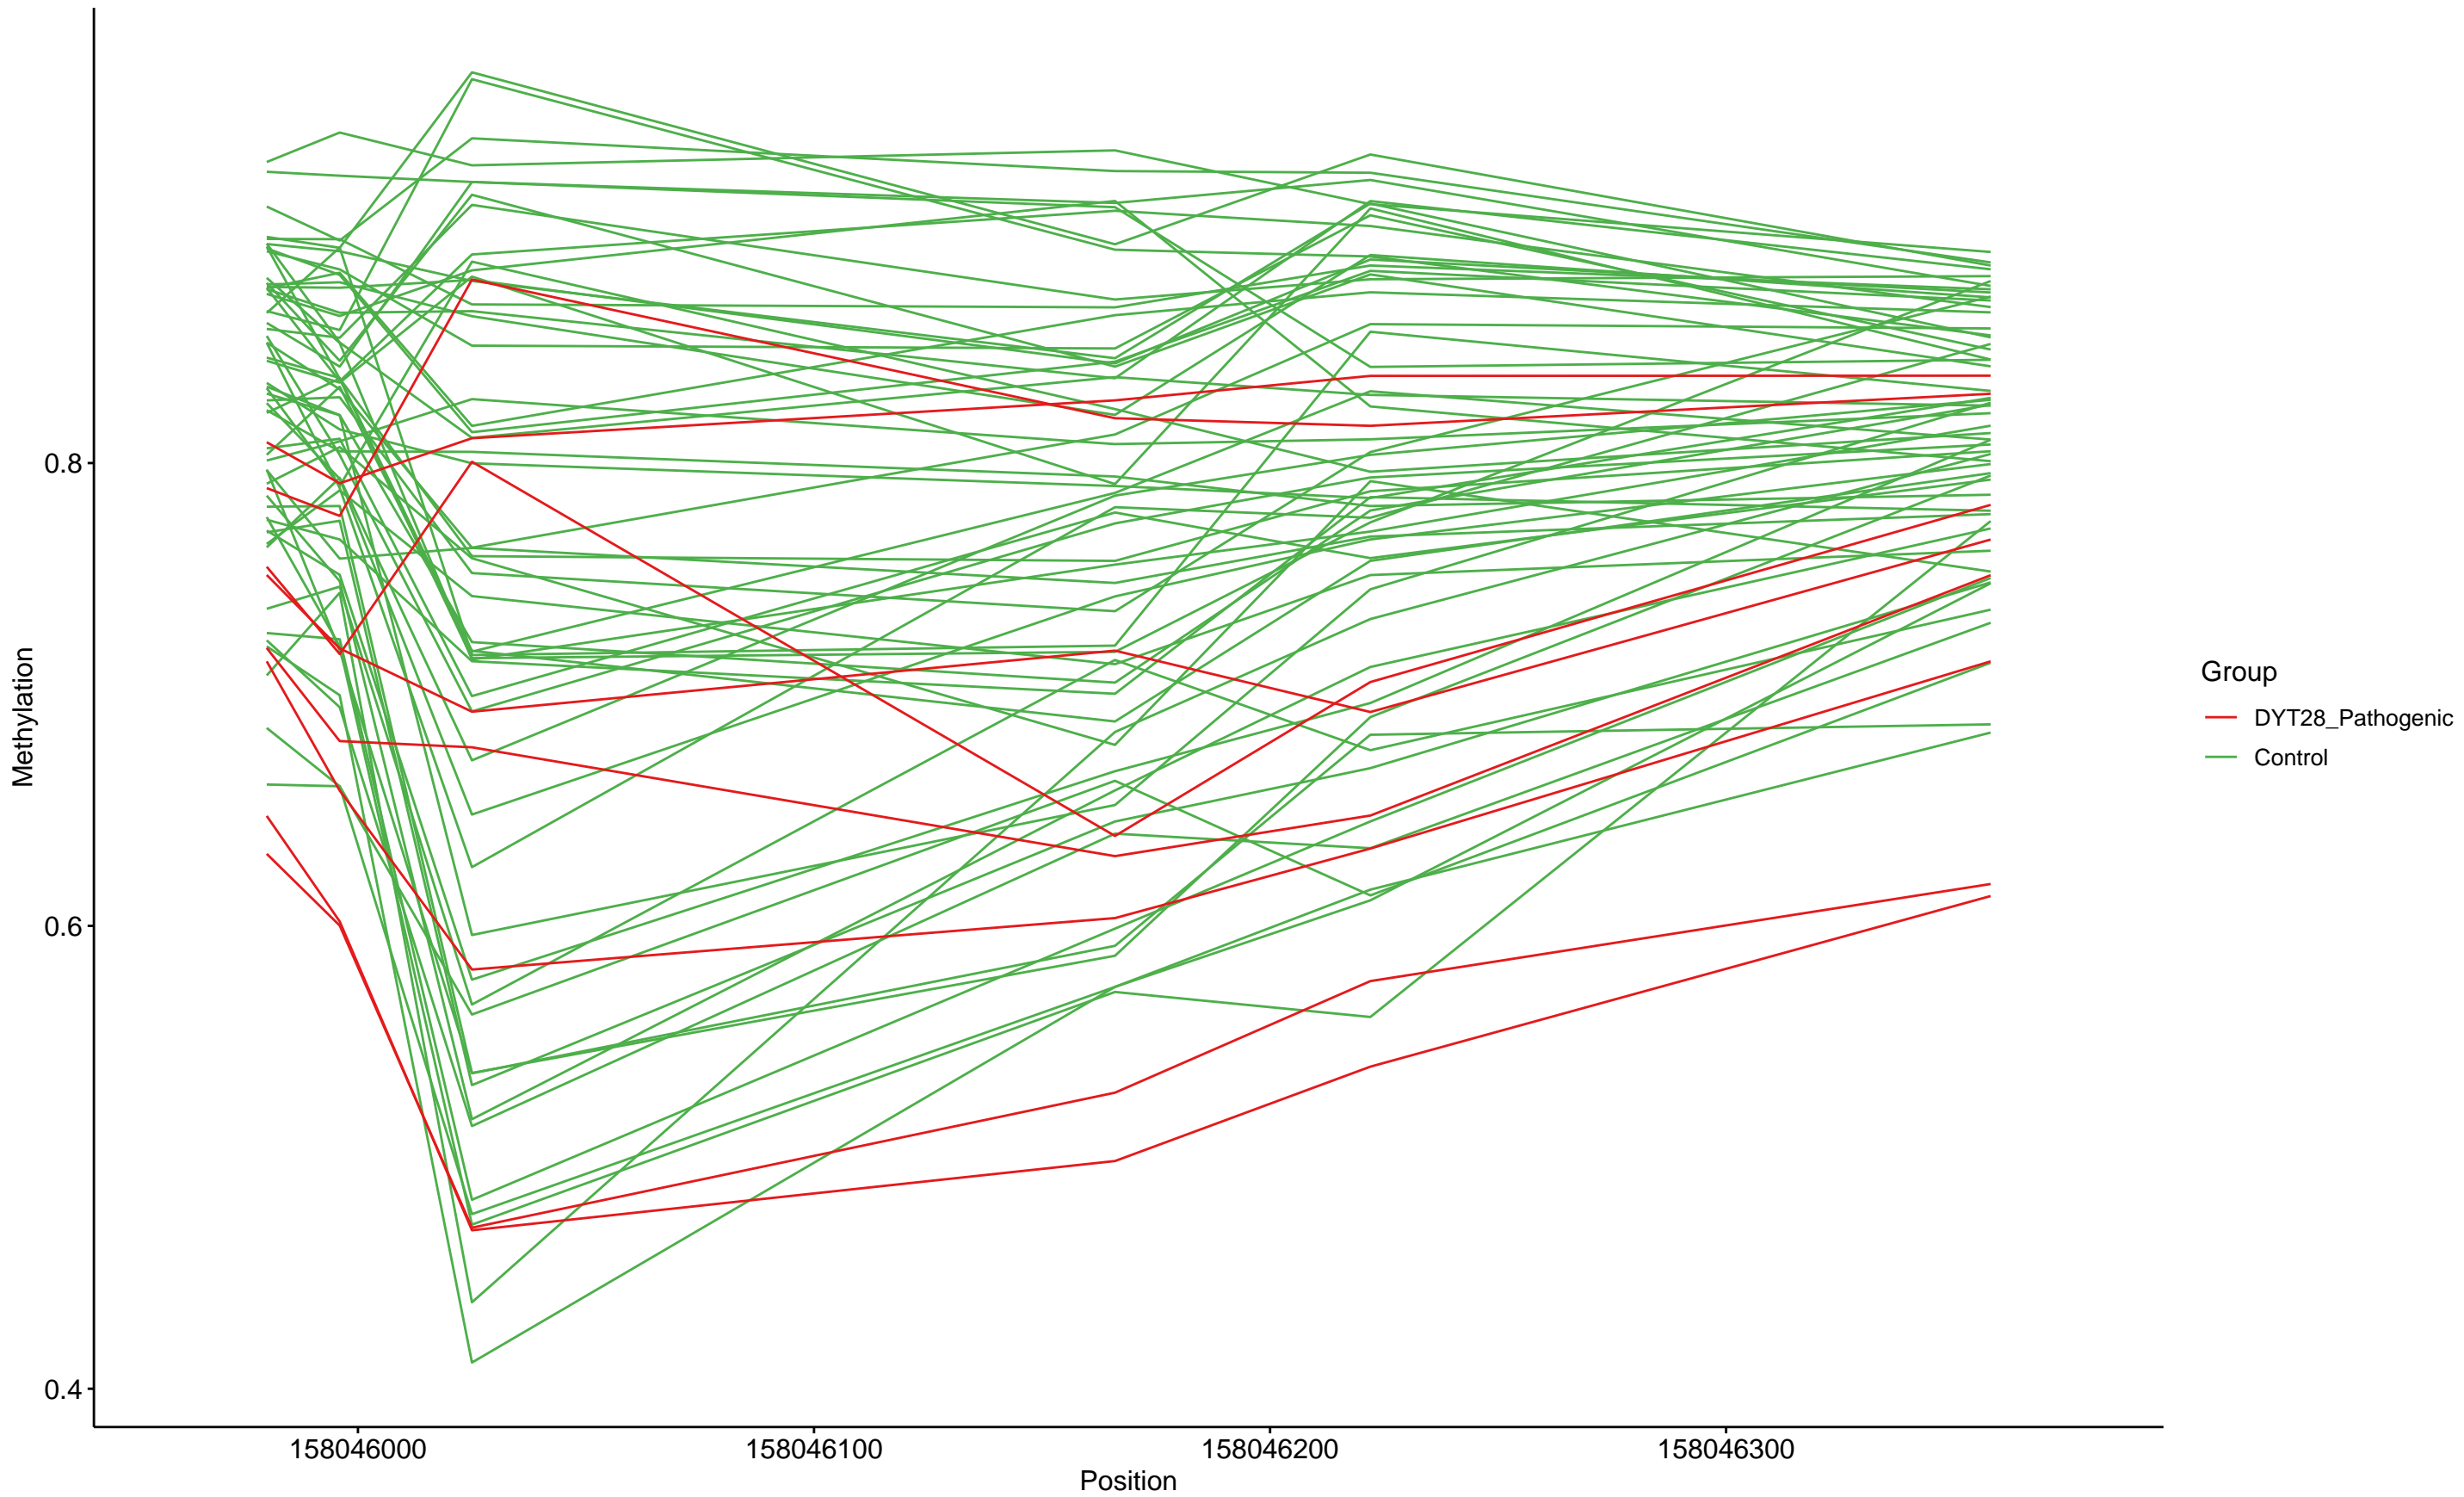

Supplement: 13148_2021_1145_MOESM7_ESM.pdf [file 13148_2021_1145_MOESM7_ESM.pdf]
